# Supplementary material for: Abnormal expression of HOXD11 promotes the malignant behavior of glioma cells and leads to poor prognosis of glioma patients
Source: PeerJ journal article supplement (doi:10.7717/peerj.10820), 2021-02-08

- Debris
- Aggregates
- Dp G1
- Dp G2
- Dp S

File analyzed: S2\_S2-4\_019.fcs  
 Date analyzed: 11-Aug-2020  
 Model: 1DA0n\_DSf  
 Analysis type: Manual analysis  
 Auto Linearity: No

Ploidy Mode: First cycle is diploid

Diploid: 100.00 %  
 Dip G1: 49.17 % at 44.10  
 Dip G2: 26.71 % at 80.58  
 Dip S: 24.12 % G2/G1: 1.83  
 %CV: 8.49

Total S-Phase: 24.12 %  
 Total B.A.D.: 16.62 %

Debris: 17.62 %  
 Aggregates: 0.08 %  
 Modeled events: 17581  
 All cycle events: 14470  
 Cycle events per channel: 386  
 RCS: 2.405

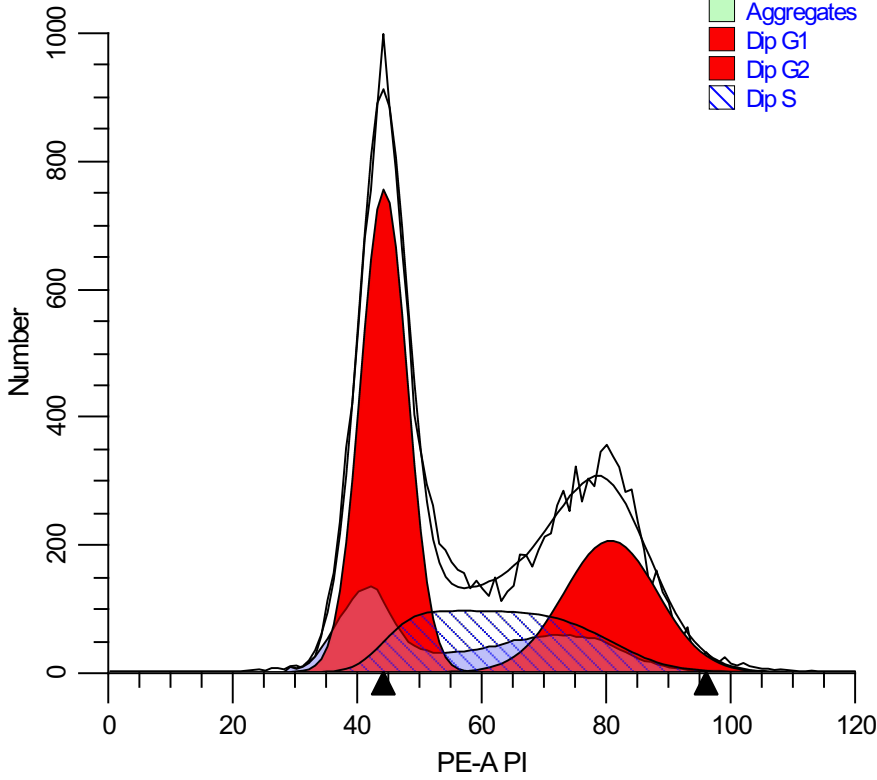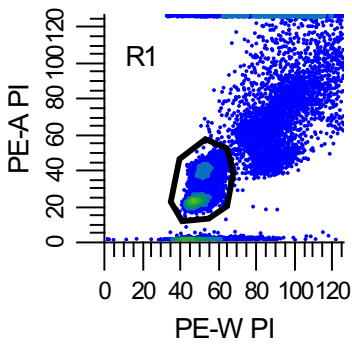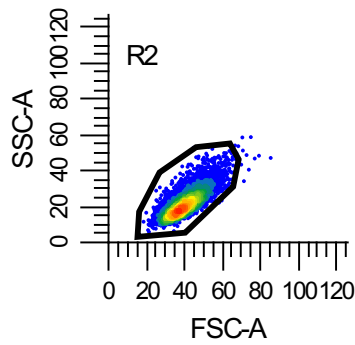

Supplement: Fig_6B-NC-anonymised_raw_data-G1_49.17_%+S_24.12_%+G2_26.71_%.pdf [file Fig_6B-NC-anonymised_raw_data-G1_49.17_%25%2BS_24.12_%25%2BG2_26.71_%25.pdf]
