# Supplementary material for: Abnormal expression of HOXD11 promotes the malignant behavior of glioma cells and leads to poor prognosis of glioma patients
Source: PeerJ journal article supplement (doi:10.7717/peerj.10820), 2021-02-08

- Debris
- Aggregates
- Dp G1
- Dp G2
- ▨ Dp S

File analyzed: S2\_S2-2\_017.fcs  
 Date analyzed: 11-Aug-2020  
 Model: 1DA0n\_DSf  
 Analysis type: Manual analysis  
 Auto Linearity: No

Ploidy Mode: First cycle is diploid

Diploid: 100.00 %  
 Dip G1: 49.98 % at 41.50  
 Dip G2: 24.96 % at 75.91  
 Dip S: 25.07 % G2/G1: 1.83  
 %CV: 8.32

Total S-Phase: 25.07 %  
 Total B.A.D.: 0.51 %

Debris: 0.75 %  
 Aggregates: 0.09 %  
 Modeled events: 25426  
 All cycle events: 25212  
 Cycle events per channel: 712  
 RCS: 2.576

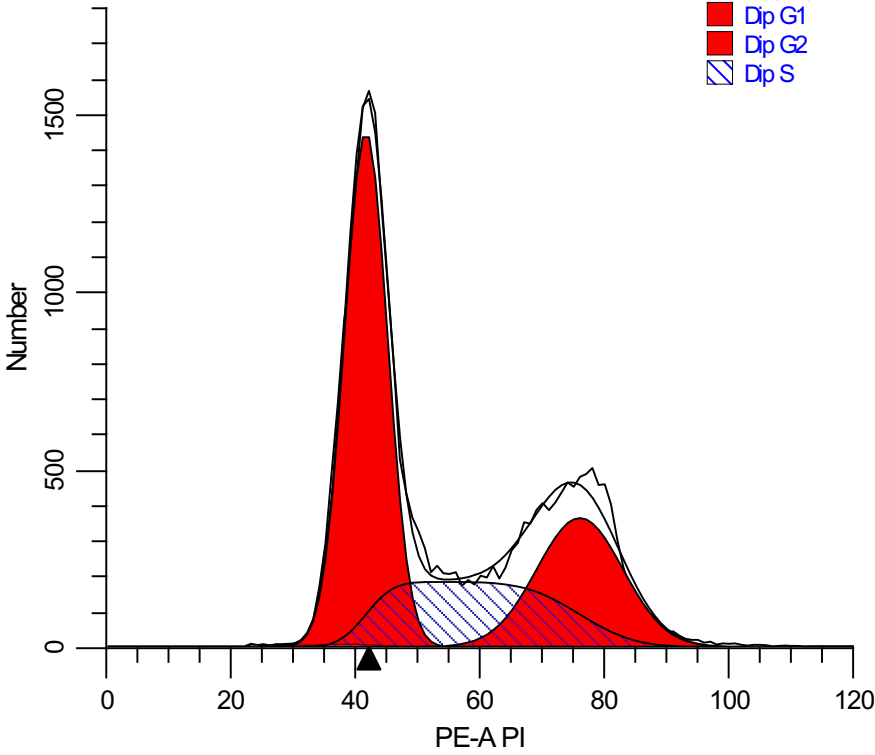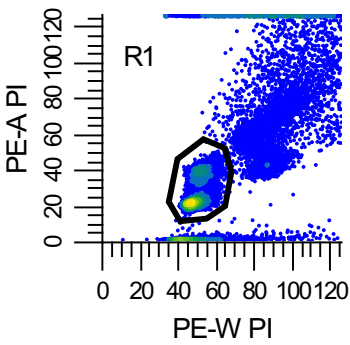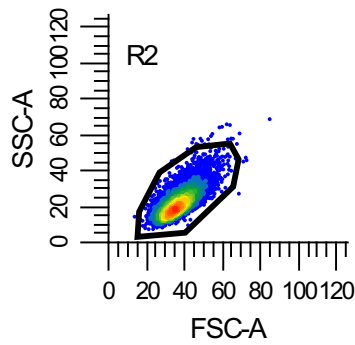

Supplement: Fig_6B-NC-anonymised_raw_data-G1_49.98_%+S_25.07_%+G2_24.96_%.pdf [file Fig_6B-NC-anonymised_raw_data-G1_49.98_%25%2BS_25.07_%25%2BG2_24.96_%25.pdf]
