# Supplementary material for: Abnormal expression of HOXD11 promotes the malignant behavior of glioma cells and leads to poor prognosis of glioma patients
Source: PeerJ journal article supplement (doi:10.7717/peerj.10820), 2021-02-08

- Debris
- Aggregates
- Dp G1
- Dp G2
- Dp S

File analyzed: 001\_NC-9\_009.fcs  
 Date analyzed: 11-Aug-2020  
 Model: 1DA0n\_DSf  
 Analysis type: Manual analysis  
 Auto Linearity: No

Ploidy Mode: First cycle is diploid

Diploid: 100.00 %  
 Dip G1: 61.22 % at 45.49  
 Dip G2: 12.44 % at 81.80  
 Dip S: 26.33 % G2/G1: 1.80  
 %CV: 12.70

Total S-Phase: 26.33 %  
 Total B.A.D.: 0.00 %

Debris: 0.03 %  
 Aggregates: 0.00 %  
 Modeled events: 10478  
 All cycle events: 10475  
 Cycle events per channel: 281  
 RCS: 1.687

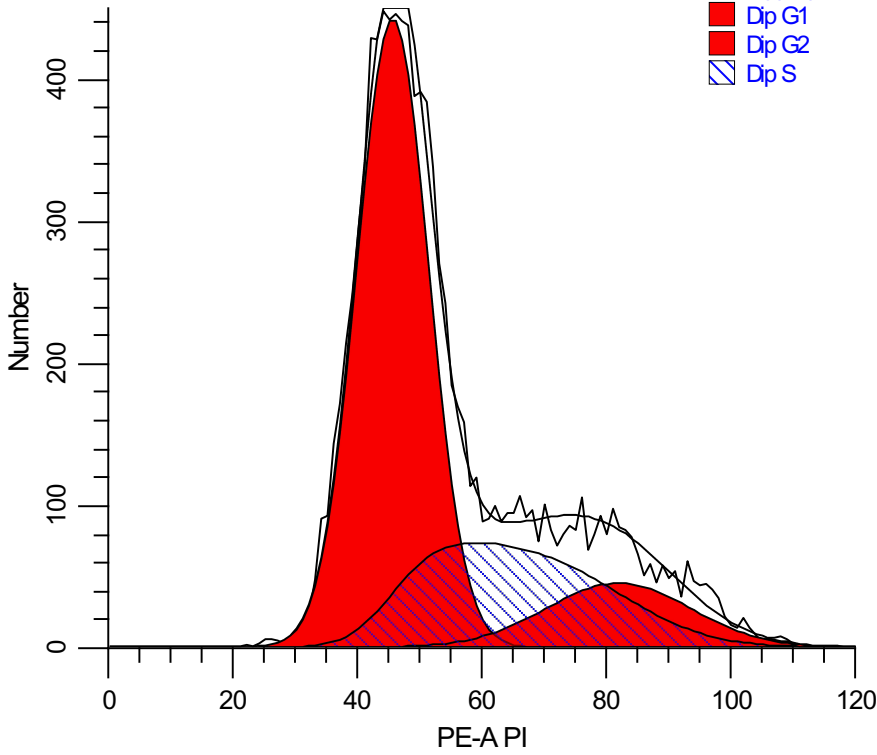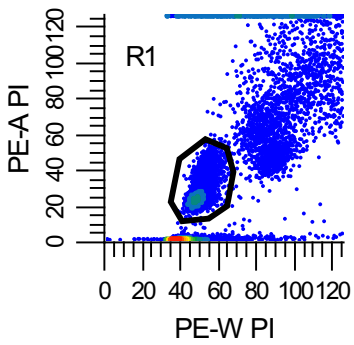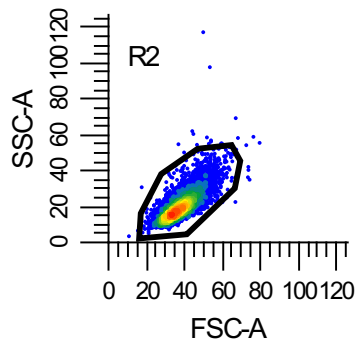

Supplement: Fig_6B-NC-anonymised_raw_data-G1_61.22_%+S_26.33_%+G2_12.44_%.pdf [file Fig_6B-NC-anonymised_raw_data-G1_61.22_%25%2BS_26.33_%25%2BG2_12.44_%25.pdf]
