# Supplementary material for: Abnormal expression of HOXD11 promotes the malignant behavior of glioma cells and leads to poor prognosis of glioma patients
Source: PeerJ journal article supplement (doi:10.7717/peerj.10820), 2021-02-08

- Debris
- Aggregates
- Dp G1
- Dp G2
- Dp S

File analyzed: 001\_NC-6\_006.fcs  
 Date analyzed: 11-Aug-2020  
 Model: 1DA0n\_DSf  
 Analysis type: Manual analysis  
 Auto Linearity: No

Ploidy Mode: First cycle is diploid

Diploid: 100.00 %  
 Dip G1: 63.96 % at 46.53  
 Dip G2: 18.99 % at 82.44  
 Dip S: 17.05 % G2/G1: 1.77  
 %CV: 12.57

Total S-Phase: 17.05 %  
 Total B.A.D.: 0.00 %

Debris: 0.08 %  
 Aggregates: 0.00 %  
 Modeled events: 11357  
 All cycle events: 11348  
 Cycle events per channel: 307  
 RCS: 1.716

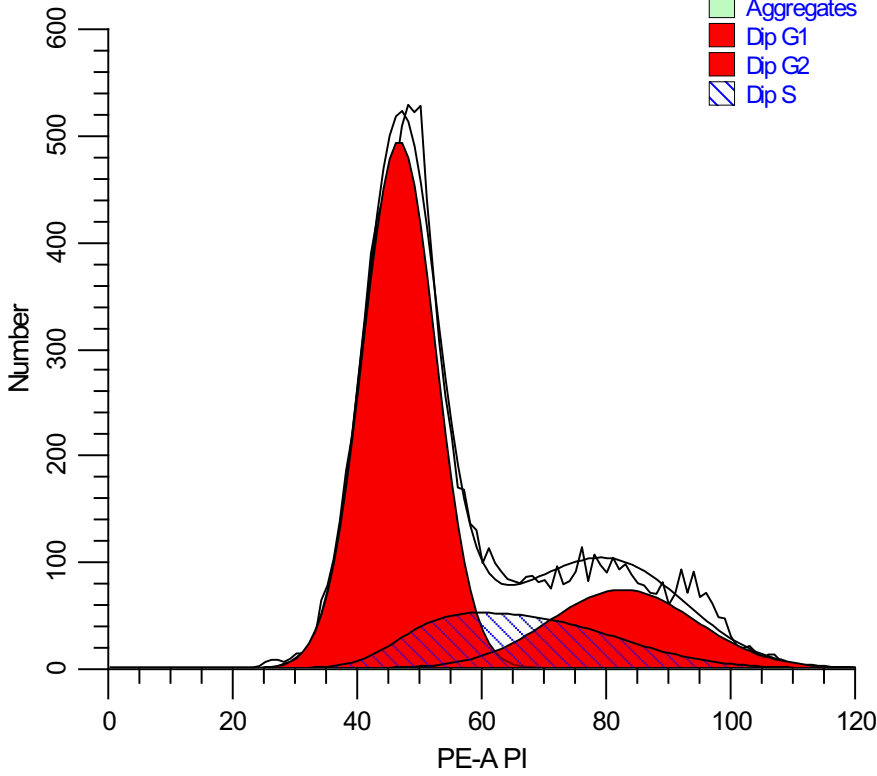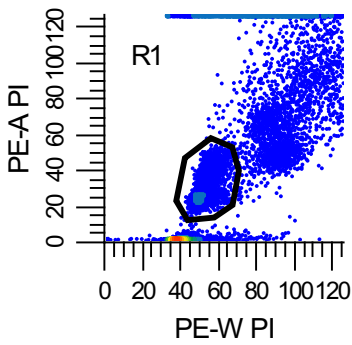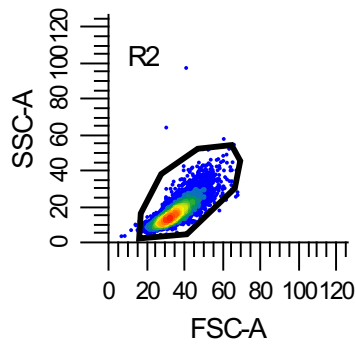

Supplement: Fig_6B-NC-anonymised_raw_data-G1_63.96_%+S_17.05_%+G2_18.99_%.pdf [file Fig_6B-NC-anonymised_raw_data-G1_63.96_%25%2BS_17.05_%25%2BG2_18.99_%25.pdf]
