# Supplementary material for: Abnormal expression of HOXD11 promotes the malignant behavior of glioma cells and leads to poor prognosis of glioma patients
Source: PeerJ journal article supplement (doi:10.7717/peerj.10820), 2021-02-08

- Debris
- Aggregates
- Dp G1
- Dp G2
- ▨ Dp S

File analyzed: S2\_S2-3\_018.fcs  
 Date analyzed: 11-Aug-2020  
 Model: 1DA0n\_DSf  
 Analysis type: Manual analysis  
 Auto Linearity: No

Ploidy Mode: First cycle is diploid

Diploid: 100.00 %  
 Dip G1: 47.43 % at 43.31  
 Dip G2: 26.99 % at 79.43  
 Dip S: 25.59 % G2/G1: 1.83  
 %CV: 8.24

Total S-Phase: 25.59 %  
 Total B.A.D.: 7.85 %

Debris: 8.53 %  
 Aggregates: 0.11 %  
 Modeled events: 22396  
 All cycle events: 20461  
 Cycle events per channel: 551  
 RCS: 1.863

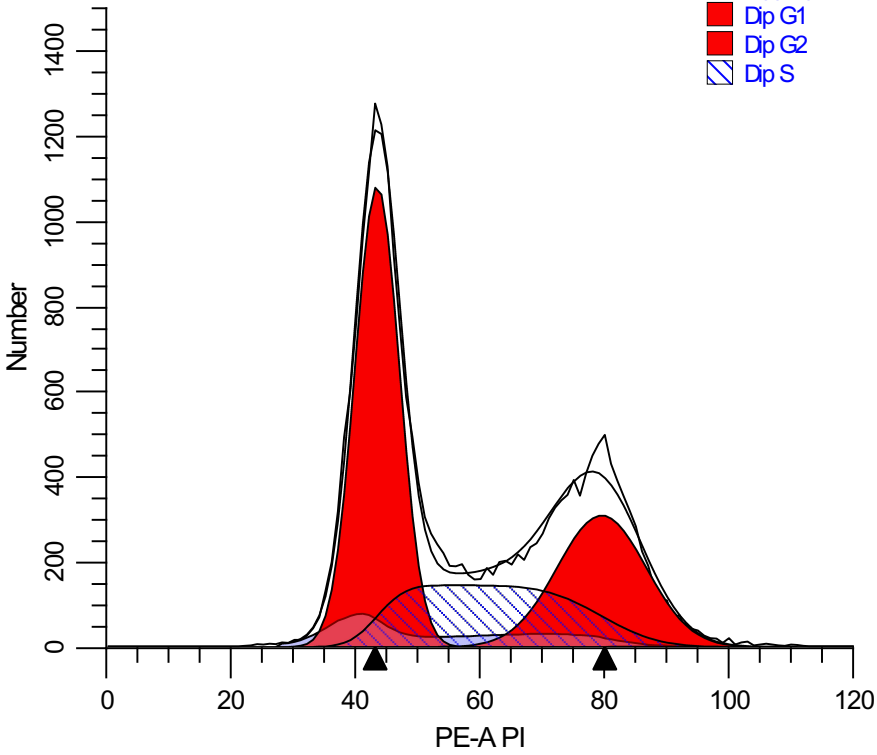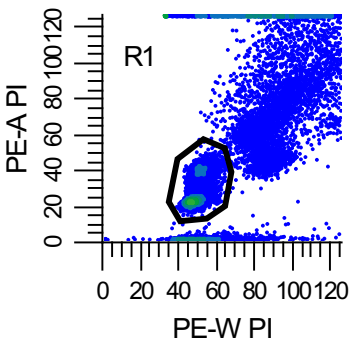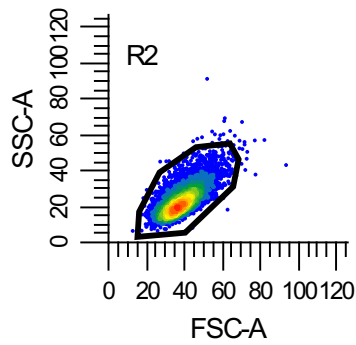

Supplement: Fig_6B-SI-anonymised_raw_data-G1_47.43_%+S_25.59_%+G2_26.99_%.pdf [file Fig_6B-SI-anonymised_raw_data-G1_47.43_%25%2BS_25.59_%25%2BG2_26.99_%25.pdf]
