# Supplementary material for: Abnormal expression of HOXD11 promotes the malignant behavior of glioma cells and leads to poor prognosis of glioma patients
Source: PeerJ. 2021 Feb 8;9:e10820. doi: 10.7717/peerj.10820 (PMC7877241; doi:10.7717/peerj.10820)
Supplement: Supplemental Information 3 [file peerj-09-10820-s003.xlsx]

## Sheet: Sheet1
id	time（year）	state	Name	Gender	Grade	Age	PRS type	Complete resection	KPS	Radio_status	Chemo_status
simple 4	0.619178	1	吕翠	Female	WHO IV	<=50	Primary	No	90	No	Yes
simple 2	1.28219	1	赵凤琴	Female	WHO IV	>50	Recurrent	Yes	80	Yes	No
simple 3	2.21644	1	尹秀英	Female	WHO IV	>50	Primary	Yes	80	Yes	Yes
simple 5	1.42466	1	雷书霞	Female	WHO IV	<=50	Primary	No	90	Yes	Yes
simple 16	1.86027	1	李美荣	Female	WHO IV	<=50	Primary	Yes	90	Yes	Yes
simple 17	3.20548	1	金树忠	Female	WHO IV	>50	Primary	No	90	Yes	Yes
simple 1	1.72329	1	毛成山	Male	WHO IV	<=50	Primary	Yes	80	Yes	Yes
simple 18	0.328767	1	宁立仁	Male	WHO IV	>50	Primary	No	90	Yes	No
simple 19	1	1	孙振东	Male	WHO IV	>50	Primary	No	90	Yes	Yes
