# Supplementary material for: Abnormal expression of HOXD11 promotes the malignant behavior of glioma cells and leads to poor prognosis of glioma patients
Source: PeerJ. 2021 Feb 8;9:e10820. doi: 10.7717/peerj.10820 (PMC7877241; doi:10.7717/peerj.10820)
Supplement: Supplemental Information 4 [file peerj-09-10820-s004.xlsx]

## Sheet: diffExpLevel
	qvalue	GSM97794	GSM97796	GSM97797	GSM97798	GSM97801	GSM97806	GSM97808	GSM97813	GSM97814	GSM97818	GSM97819	GSM97821	GSM97839	GSM97829	GSM97832	GSM97844	GSM97847	GSM97851	GSM97852	GSM97856	GSM97859	GSM97861	GSM97863	GSM97869	GSM97870	GSM97871	GSM97877	GSM97882	GSM97885	GSM97886	GSM97887	GSM97888	GSM97889	GSM97891	GSM97892	GSM97893	GSM97894	GSM97895	GSM97896	GSM97898	GSM97903	GSM97905	GSM97906	GSM97908	GSM97912	GSM97914	GSM97915	GSM97917
SLC30A3	1.74e-34	5.06604	5.21478	4.90721	5.00952	4.83167	5.0388	4.75312	4.67402	5.07985	4.96481	4.53863	5.49911	4.71308	4.7799	5.69819	5.75359	4.65799	4.82478	4.97952	4.85639	4.95759	5.0175	5.12487	4.94674	4.59569	4.85718	4.95843	5.10123	4.63992	4.94473	4.88756	4.98605	4.84345	5.22786	6.02997	4.60888	4.58792	5.03194	4.62312	4.52482	4.85919	4.85758	4.64025	4.71548	4.68231	4.8997	4.89706	4.64886
NDC80	7.26e-28	7.58639	8.56113	6.28578	9.67605	5.63257	7.88025	9.68107	10.403	7.9258	7.9333	6.2177	8.8983	9.05862	6.24923	5.83205	4.04938	8.45204	9.29644	6.81368	8.59981	8.01273	8.53886	8.20917	8.73024	8.67408	8.46517	7.68746	9.33885	9.03452	7.99722	8.62348	9.96597	8.6786	9.15237	3.2186	8.38293	9.64502	8.15836	8.83069	8.69699	8.1241	8.44166	8.97477	7.25717	10.0642	7.87777	8.07515	8.10282
SERTM1	7.48e-26	8.4762	6.67577	6.58062	6.62461	6.52658	7.83511	5.95238	6.5869	7.38749	7.53831	6.93483	8.7714	7.64112	6.6426	9.25282	9.75377	7.66159	6.73968	6.90206	6.88679	7.20474	6.9637	7.09533	7.66274	6.07044	6.52362	8.23762	7.5626	6.71564	6.30245	6.66757	7.72115	5.90961	7.53034	9.55909	7.12706	6.45371	6.99898	7.19852	6.40134	6.97974	6.8869	7.00404	7.41556	5.77892	6.82054	7.002	6.54795
NOTCH2NL	3.61e-25	12.0668	12.9098	11.3336	12.945	12.6573	12.406	13.444	11.6659	12.7721	12.4743	11.7348	12.6429	12.3583	12.1341	11.3149	10.9119	12.2494	12.1467	12.3884	11.6017	12.354	11.7831	12.6987	12.1606	12.115	12.6035	12.1983	11.9548	11.9953	14.1472	12.9051	12.9402	11.1936	13.1238	10.9092	12.5289	12.8776	12.2409	12.3366	12.1341	12.5751	12.3444	12.7721	12.2871	11.5281	11.8053	12.4582	11.8734
RPLP0	5.5e-25	14.0659	14.2257	14.0393	14.2257	13.6985	14.2732	14.1619	14.2732	14.3427	14.0816	14.1472	14.2257	14.1472	13.8291	13.9729	13.1782	14.1062	14.2898	14.195	14.0816	14.3624	13.8455	14.0816	14.2257	14.2117	14.2117	13.7961	14.132	14.241	13.9729	14.5488	14.195	14.0267	14.2732	12.748	14.2566	14.132	14.4262	14.5685	14.241	14.3072	14.2566	14.3072	14.0511	14.3427	14.2732	14.3249	14.1187
TOP2A	5.81e-25	9.72277	9.70665	7.57008	10.6364	6.43081	10.0184	10.6477	11.1547	8.97519	8.39975	7.0141	11.2039	9.3778	7.55279	7.14441	3.98553	8.7779	8.85866	9.13628	10.7588	9.92482	9.68447	8.7801	10.362	10.5374	10.4669	8.86001	10.6953	10.4988	9.97918	10.9444	11.5237	9.54082	11.0898	3.89374	9.30258	10.5348	6.41808	10.0342	9.22371	9.62803	8.59872	10.1738	8.54749	10.9211	8.17446	9.47219	7.53393
ANXA5	1.06e-24	13.3673	13.5137	13.1346	13.3531	13.1843	13.8911	13.2986	13.2808	13.8568	13.7526	12.3605	12.8211	13.7145	14.1062	12.2069	11.4533	13.3239	13.7064	13.2522	13.2697	13.2117	13.8291	13.7961	13.1238	12.2027	13.4021	13.0692	13.3942	13.464	13.7603	12.9723	13.2175	13.5988	12.9402	11.7738	13.5073	12.727	12.7952	12.9402	13.0432	13.5746	12.945	13.3804	13.3406	12.3321	13.2865	13.821	13.2808
NES	1.17e-24	11.6772	12.0022	10.9346	13.0794	11.8066	12.5871	12.9098	12.2893	13.0484	11.8291	11.2484	12.1792	11.6397	11.9284	10.093	8.21322	10.9112	11.3552	10.8948	12.2313	11.1789	12.6069	12.4691	11.365	12.0076	12.5256	10.6217	11.9834	12.0459	13.0379	12.0777	11.3495	12.0442	12.3957	8.86732	12.3391	12.3659	9.27003	11.8376	12.2601	11.5366	12.1835	12.9589	12.4639	11.7589	11.261	11.7186	11.2409
VIM	1.26e-24	13.4698	13.6169	13.4768	13.8117	13.444	13.5369	13.6397	13.464	13.7961	13.4505	10.7168	13.444	13.5369	13.1396	11.5454	11.7714	13.8733	13.4021	13.821	13.5442	13.4768	12.9769	13.8655	13.7961	13.1676	13.777	13.1503	13.6397	13.674	13.9934	13.821	13.7526	13.8039	13.9625	11.5829	13.4293	13.9088	13.8568	13.7372	13.8291	13.6818	13.4227	13.7372	13.6241	13.2697	13.3353	13.7526	13.3804
BTG1	2.95e-24	11.8554	12.7832	12.0567	12.3492	11.5187	11.6744	12.254	11.4749	11.498	12.039	12.0687	11.5923	11.8167	11.4282	11.5164	10.7542	12.1324	11.8463	12.7303	12.7756	12.5967	11.7321	12.1606	11.5993	12.0527	12.0267	11.914	11.8554	11.9393	10.7841	12.0372	12.1912	12.5359	11.4191	10.2991	11.7888	12.1446	11.9779	12.5909	11.7006	12.4109	12.2847	11.756	12.4203	12.0828	11.9711	12.2468	11.7385
CD99	3.62e-24	13.0432	13.4161	12.6789	13.7372	13.1083	13.2924	13.6545	13.674	13.769	12.5839	13.8733	12.915	13.6644	13.2924	12.2688	10.7465	13.9522	14.0148	13.8995	13.674	13.6241	13.4924	13.6468	13.1622	13.2986	13.9837	13.0537	13.3607	12.8696	13.4293	12.5809	13.9088	12.0703	13.4293	11.8716	14.0267	12.8495	13.3114	13.8995	14.0935	13.018	13.9171	12.8495	13.5137	13.1724	12.7989	13.4698	13.6644
SNRPG	5.1e-24	12.1264	12.2069	11.5958	12.4853	11.6597	12.4255	12.6198	12.8911	12.3856	11.8449	12.1814	11.9218	12.406	11.6883	11.9779	10.9245	12.3341	12.401	12.3713	12.5564	12.0112	12.0961	12.4131	12.225	12.4743	12.1264	11.4533	12.4826	12.2468	11.9934	11.4926	12.4909	12.0112	12.406	10.9843	12.3884	12.5359	11.9427	12.2941	11.9953	12.3778	12.3605	12.542	12.2799	13.1083	12.0687	12.3929	12.1013
CPLX3	5.97e-24	6.88309	6.37163	6.52234	6.52376	7.00155	5.959	6.30674	6.87136	6.1818	6.96141	7.61457	7.51316	7.04344	6.77108	7.23922	7.85417	6.50739	6.35361	7.57696	7.05869	7.133	6.03286	6.9017	6.75143	7.15787	6.77755	6.53209	6.95091	6.74518	6.37824	6.63586	7.02676	6.71451	6.21429	8.56827	6.54348	7.22626	6.76537	6.97929	6.37238	6.8769	6.69787	6.84978	6.98502	6.90298	6.6352	6.68085	6.47669
TSPAN6	1.35e-23	10.9471	11.4263	10.2868	11.4479	11.3687	11.3194	11.147	11.0928	11.5933	10.9218	10.951	10.1514	11.2714	11.6299	10.1154	9.29891	10.8543	11.111	10.9444	11.9627	10.9162	10.6118	11.367	11.0546	11.2043	11.0703	10.338	11.3495	11.0247	10.49	11.7714	11.5344	10.803	11.171	8.83786	11.756	11.4415	10.645	10.7993	11.2602	10.4988	11.1919	11.2179	10.7312	11.0247	11.5035	11.591	11.486
LY86-AS1	3.46e-23	7.11726	6.60161	6.46604	6.91092	6.30512	6.76574	6.57309	6.45102	6.11374	6.92398	6.22964	6.9543	5.0759	5.94342	7.33833	7.97061	6.03346	6.21986	6.54348	6.29539	6.45389	6.74843	6.78389	6.48728	6.31183	6.55904	7.78347	6.82468	6.7094	6.61842	6.6597	6.2773	6.5487	6.85198	8.16606	6.29769	6.03843	6.62954	6.40086	6.13367	6.76574	6.69816	6.05727	5.93877	6.58795	6.515	6.37348	6.74309
UHRF1	4.13e-23	10.6385	11.5497	9.52404	11.8435	8.98175	11.635	12.1341	11.8435	11.7375	10.1467	10.332	10.3983	9.92433	10.9694	10.2191	7.49612	8.6711	11.0286	9.05445	11.5862	11.7872	12.271	10.5448	11.6207	11.3406	12.0317	9.39728	11.598	11.6183	11.6857	12.6137	12.3806	11.6906	10.8909	7.89367	12.2757	11.6275	7.7783	11.8796	11.7199	11.5056	11.5175	11.6183	8.974	11.7645	10.9516	11.2164	9.80562
SST	4.66e-23	9.11596	8.15902	8.33176	6.77803	8.74383	7.91372	6.09872	6.61627	5.04117	8.74575	7.14242	10.1942	6.85585	9.13536	11.0445	10.3416	8.76613	7.51202	8.52531	6.88181	6.93788	8.51327	7.62256	9.24785	8.51201	7.86451	9.79913	8.53194	8.12334	6.89816	7.31808	7.3853	7.12145	8.41213	11.7816	6.94982	7.59999	7.50321	7.10794	6.38901	7.99752	7.43505	7.23546	7.85848	8.00365	8.20626	5.65159	5.67325
GABRA5	6.07e-23	8.4236	7.14136	7.15959	6.52284	6.41222	8.16446	6.34987	5.85732	7.38184	7.20286	7.01199	9.19159	6.2674	7.07738	8.89296	10.1032	7.7084	6.55588	8.07356	6.08111	7.19253	7.3379	7.08221	8.22819	6.47235	5.99851	8.89059	7.7936	7.9561	6.68451	6.87606	7.3546	6.74012	6.92	10.1234	6.22621	6.328	7.19309	7.15359	6.91359	7.36874	7.12636	6.2664	6.8643	6.42811	7.05802	6.94503	6.75117
WEE1	6.38e-23	10.3013	11.1926	9.45387	11.1477	9.30482	10.4915	10.6262	10.1254	11.4159	9.65109	10.2352	10.5324	10.053	9.83794	7.46049	6.93679	10.3193	11.6584	10.1942	11.4544	9.92513	10.2126	11.0818	9.47188	9.56413	11.0033	9.13376	10.3004	10.4491	10.1422	10.904	10.5298	12.4285	10.3858	5.84378	10.1464	11.0737	10.3361	10.7853	10.4587	10.2723	9.73041	10.1847	10.0841	9.20269	9.57714	10.238	11.1968
CCKBR	1.33e-22	7.83511	6.82908	7.02863	6.57026	7.53994	7.86855	7.41802	7.06232	6.90379	7.15315	7.4857	8.02378	7.36604	6.75897	8.3509	8.91831	7.68339	6.95199	7.0466	7.34067	6.76079	7.1948	7.36771	7.23195	6.73123	6.66641	8.44234	7.6572	7.18608	7.28412	7.67487	7.24338	7.07766	7.57124	9.12411	6.76117	7.21766	6.78125	7.17586	7.02044	7.38516	7.35401	7.07144	6.76607	7.24399	7.5234	7.28812	7.06035
RPS19	1.35e-22	13.089	13.6322	13.4293	14.0023	13.5137	13.8039	14.0659	13.3531	14.0935	13.8823	12.7913	13.5	13.5442	13.5073	13.1191	12.7184	13.4698	13.5668	13.464	14.2257	13.9729	13.4505	13.6169	13.6322	13.275	13.4768	13.1448	14.0659	13.5595	13.6397	14.1472	13.9302	12.8065	13.8291	12.6069	13.8291	13.6818	13.8823	13.9934	13.8117	14.0023	13.8733	14.241	13.522	14.1619	13.7064	14.0511	13.7064
CRH	1.37e-22	6.23382	5.81009	5.94221	5.83205	5.37312	6.66067	5.73145	5.90765	4.79246	6.16336	5.75135	7.31498	4.09579	5.36521	8.05751	7.32925	5.5309	5.91525	5.84839	5.43831	5.23641	4.53313	4.86234	5.80611	5.81775	5.15916	6.4712	4.93521	5.61334	5.93719	4.30935	5.18041	5.12076	4.18638	8.60499	4.49726	5.75966	4.36619	4.8997	5.5398	5.84084	5.90533	5.25007	5.40132	5.24942	5.7248	5.73329	6.0655
SPARC	1.73e-22	13.5988	13.4698	13.6241	13.4372	13.7288	13.2986	13.3114	13.5137	13.787	13.5595	13.9625	12.3659	13.3475	13.6322	13.8995	11.6219	13.8995	13.7372	13.2474	13.1956	13.6397	13.5988	13.6241	13.5369	13.5821	13.4924	13.5369	13.3406	13.3531	12.81	13.6241	13.6896	12.8736	13.023	12.1853	13.8655	13.4161	13.8655	13.5442	13.9302	13.1782	13.9522	13.674	13.787	13.1503	13.3406	13.769	12.8911
SEMA4A	1.86e-22	8.50386	8.07203	7.89034	7.69969	8.22013	7.94581	7.19782	7.60894	7.42706	7.79528	7.95717	7.77508	7.97732	6.80208	8.39401	9.4242	7.47457	7.33951	5.73464	8.10296	7.87503	7.75718	7.45503	7.79111	8.10733	7.48941	8.23972	7.67742	7.2498	7.57776	6.42791	7.26885	7.73929	7.95194	8.91391	7.32158	8.44368	7.24651	7.35774	7.74699	7.66573	7.57642	7.2093	8.42245	7.30297	8.02047	7.24366	7.62651
P4HB	1.93e-22	11.9763	12.6326	11.958	12.6679	11.566	11.9677	12.6035	12.5289	12.4826	11.9934	11.8053	11.728	12.6296	11.8944	11.0052	10.7388	12.6643	12.5387	12.8824	12.7682	12.3778	12.0512	12.8577	12.0651	11.9711	12.5967	12.1228	12.2427	12.1568	11.7645	12.4229	12.5328	12.4937	12.2776	10.7119	12.2494	12.2229	12.7337	12.7082	12.8136	12.3465	11.6945	12.8211	12.6165	11.8435	12.626	12.5871	12.1378
WDR7	2.63e-22	9.54205	8.75726	9.35487	8.60487	9.69847	9.21699	8.51498	8.85758	8.47384	9.81491	9.29346	9.83374	9.07609	9.52161	10.1742	10.5289	9.14035	8.73511	8.88598	8.50179	8.57091	9.21871	8.45953	9.79984	9.19962	8.19814	10.224	9.28372	9.28959	7.55631	8.93256	8.45081	8.3331	8.95713	10.735	8.695	8.05517	8.68248	8.42014	8.72192	9.39616	9.2744	8.59201	9.37916	8.65931	9.46759	8.53719	9.07811
MELK	2.7e-22	9.73775	9.02407	7.52744	9.83017	3.95443	9.24551	10.4345	10.7454	9.03278	8.49901	5.22558	10.5598	9.14309	7.02661	6.82332	3.19539	8.92788	10.0838	8.98888	10.2885	9.55995	9.00938	8.70007	9.55089	9.83035	9.41282	7.67691	10.3119	9.74102	10.4915	9.37235	11.2212	9.85918	9.94194	3.84697	8.77623	10.4682	7.60824	10.0773	9.8248	9.11233	8.77341	9.96861	8.19361	10.4085	8.15067	9.44806	8.99014
RPN2	3.56e-22	12.6137	12.6643	12.2688	13.2986	12.3929	12.4582	13.5524	12.7832	13.2058	12.8538	12.2557	12.5599	12.7147	12.9361	11.7519	11.0868	12.9852	12.8034	12.4909	13.1503	12.3637	12.4084	12.6035	12.4285	12.4772	13.1238	12.3659	12.3982	12.6818	12.5627	13.0938	13.1191	13.0692	13.0329	11.1016	12.8373	13.5988	12.5289	12.6679	13.2986	12.5079	12.7337	13.4924	13.4085	12.9275	12.6471	13.0938	12.8619
RAB31	3.56e-22	12.4772	13.1238	12.4312	11.6906	12.748	12.8211	11.5088	12.9361	12.6504	12.9197	13.777	12.685	13.0484	13.2865	12.7404	11.6757	12.9497	13.3735	11.9743	11.9062	12.8256	13.6468	12.7184	13.1724	13.2634	12.915	12.2518	12.6001	12.9769	12.271	13.157	12.3252	13.2342	12.8736	11.9627	13.0692	12.3278	11.6253	12.9361	13.3804	12.7116	12.8412	13.275	13.0794	12.3982	12.8736	13.1191	12.0906
RASAL1	4.2e-22	8.18985	5.73818	7.55162	6.57519	7.55069	7.82624	5.95752	5.75414	5.67056	8.00087	5.84561	8.24131	5.89688	6.18884	8.77623	9.20816	7.93881	6.60242	6.90995	6.49055	6.67015	6.96179	7.06644	7.55437	7.11527	5.87512	8.12568	7.40034	7.31263	6.19088	5.15256	7.36681	5.31231	7.71204	9.2577	7.46113	6.29158	6.4894	6.91586	6.3622	7.36771	6.08363	6.70891	6.69245	6.1348	7.86237	5.48661	5.45396
SEC61A2	5.09e-22	8.94849	8.10176	9.30327	8.21294	9.27341	8.68558	8.14971	9.76593	8.33624	8.82605	8.77719	9.35009	8.35183	8.53261	9.35258	9.85293	7.96928	8.03427	8.12146	8.38356	8.75317	8.60815	8.30824	9.36805	8.96849	8.4299	9.28493	8.51458	8.84399	9.15698	8.74383	8.54089	9.07131	8.75632	9.83171	8.58694	8.18672	8.28454	9.1229	8.27375	8.52199	9.29182	8.48818	7.9827	9.39065	8.78673	8.0557	8.50201
LRP11	5.47e-22	10.3921	9.64635	10.0869	9.60531	10.0958	9.55009	9.70187	9.23538	8.26802	10.3206	10.1105	10.7478	9.04724	9.6493	10.7437	11.449	10.0359	9.39038	10.0733	10.0869	9.34861	9.75765	9.37321	9.93228	9.70036	8.67586	10.836	9.66395	9.63789	9.73895	8.63446	10.1664	9.41684	9.38965	11.4593	9.55789	9.46092	10.8534	9.20694	8.9209	10.0793	9.95426	8.98454	8.98429	9.56051	9.84725	9.01615	10.1479
HTR2C	5.63e-22	6.51403	5.51199	5.70475	5.86326	5.65296	5.21096	6.00837	5.45396	5.57729	5.94114	4.85216	6.35823	5.1651	5.96553	6.7391	7.43716	5.80445	4.50689	5.23171	4.62123	5.49448	5.64039	5.31324	6.4329	5.6289	5.55191	7.27933	5.22012	6.07608	4.14934	5.37183	5.56197	5.81285	5.13203	8.11771	5.23356	4.91573	5.89418	6.43911	5.30551	5.76202	5.13024	5.16008	5.74699	4.09326	5.7248	5.53759	4.64097
HSD17B10	6.38e-22	10.9557	11.3122	10.6641	11.1454	11.222	11.4321	11.2426	11.8245	11.6275	11.1096	11.2834	11.175	12.0724	11.4081	10.7306	10.1039	11.3465	11.7024	12.0495	12.2027	11.2107	11.3795	11.1023	11.1124	11.2626	11.1342	10.5479	11.5293	11.234	12.0036	11.3122	11.157	11.0515	11.8675	10.1286	11.6183	12.3228	10.7758	11.1783	11.8854	11.3486	11.3306	11.8659	11.6857	11.6813	11.3786	11.6189	11.4749
SMAD5	6.92e-22	10.5131	10.5136	10.321	10.75	10.0324	10.4785	10.5954	10.5216	10.3074	10.0491	10.4094	10.7921	10.4448	10.2364	10.0955	9.45268	10.1043	10.0459	10.0834	10.085	10.2578	10.3278	10.1178	10.3074	10.3914	10.6077	9.94627	10.4656	10.7421	11.1154	11.7952	10.4703	10.6445	10.886	9.42533	10.6641	10.6559	10.4825	10.382	10.2256	10.0778	10.3322	10.3602	10.2368	9.56351	10.0225	10.7136	9.89858
EIF4EBP1	7.09e-22	8.53833	10.3677	8.83288	9.49651	8.22792	9.99962	9.62114	9.99894	9.38302	9.49502	9.53919	8.44912	10.1552	8.47866	8.48638	5.18329	9.97389	10.6467	10.76	10.92	10.5216	10.0243	10.3359	9.74195	9.81419	9.94807	8.25365	10.6609	10.0951	9.57038	9.43442	10.0032	9.58584	9.01122	5.31803	9.12638	9.10729	9.10509	10.1014	9.53716	10.3602	9.54164	9.1575	10.2806	10.4948	9.85763	9.81475	9.22229
NOTCH2	7.41e-22	11.1646	11.175	10.7484	11.4426	10.7284	11.4479	11.4003	10.8577	11.2179	10.9905	10.4491	11.5112	11.086	10.8463	10.4693	10.3022	11.1463	11.0883	11.5237	10.5025	10.9346	11.0239	11.2091	10.8041	10.8518	11.2534	10.9283	11.0474	11.2253	11.2595	11.6611	11.2107	10.7216	11.234	10.1242	11.4902	11.3296	11.4717	11.1242	11.4159	11.2115	11.6149	11.2508	10.5913	10.8985	11.0163	11.2365	11.4182
HMGB2	7.72e-22	11.2391	12.1531	10.4638	12.4365	10.3316	11.5099	12.3828	12.5656	11.1628	10.8318	9.88192	12.2131	11.2365	10.3464	9.74672	9.40958	10.5383	11.2824	11.1734	11.5767	11.8228	11.3094	10.9365	11.8025	11.5639	11.6597	11.1432	12.1708	11.7186	10.8493	11.7631	12.6165	10.9885	11.8854	9.77629	10.9745	11.5088	11.9079	11.3724	11.0984	11.4605	10.5108	11.646	10.383	11.7006	10.8397	11.2443	10.6825
EZH2	8.9e-22	9.60382	9.6232	8.29186	9.64742	7.71897	9.35738	9.94627	10.6137	9.4349	9.00436	8.09852	10.412	10.0036	8.39412	7.22004	6.08997	8.5846	9.66395	9.36893	10.5166	9.97146	10.0401	9.82952	10.2772	10.3742	10.0265	8.82902	10.5348	9.98125	10.0205	9.92752	10.9112	9.44483	10.1497	6.85112	9.62597	11.1578	8.18756	10.4434	9.77629	10.1818	9.85901	9.94004	8.0212	10.4943	8.60008	9.51347	9.20463
MAML2	9.02e-22	10.6046	10.9379	10.188	10.6779	10.1564	10.5928	10.5991	10.6675	11.0999	10.2802	11.292	9.96983	10.7777	10.1085	10.6283	8.81497	10.5508	10.1126	10.36	10.1322	11.2551	10.5315	10.635	10.497	11.3162	10.5161	10.4249	10.1984	11.04	10.5825	11.4246	10.5327	10.364	10.9148	8.60632	10.9618	10.4457	10.6893	11.5555	11.1501	10.7431	11.5099	10.7486	10.2595	11.2714	10.2735	10.45	10.8425
CPNE6	9.69e-22	7.57448	5.39094	5.22309	4.97709	6.58844	6.85861	4.57849	4.73012	5.10901	6.68349	4.04975	7.90165	6.49939	6.51104	8.43679	9.25871	6.32317	4.27508	5.63392	4.38337	3.97675	6.87396	4.72276	6.85976	5.77465	4.31671	8.0645	6.0163	6.0196	5.47393	4.48799	4.53313	4.67235	6.82848	9.15888	4.97952	4.61406	4.62231	4.46285	4.34678	5.65951	4.32614	6.04737	5.90548	5.08528	7.80683	5.27683	4.46758
RHOC	1.04e-21	10.9224	11.5791	10.9639	11.3269	10.64	11.141	11.2619	11.3279	11.9001	11.214	10.1907	10.76	11.6006	10.9034	9.67015	9.04736	11.5269	11.9268	11.5013	11.4522	10.1949	11.899	11.3876	11.1523	11.2115	11.9658	10.1884	11.6423	11.4926	11.4794	10.2768	10.3085	11.8304	11.0286	9.43266	11.7308	11.4749	11.0019	11.7766	12.1664	11.9393	11.9298	11.8463	12.2069	11.7172	11.641	11.9779	11.6078
GSKIP	1.08e-21	10.2889	10.0342	10.4664	9.91935	10.286	10.0681	10.1967	9.72151	9.43703	10.3671	9.93731	10.437	9.71777	9.6184	10.5616	10.8163	10.2332	9.78967	9.65706	10.1845	10.2236	10.0405	10.2317	10.3037	10.0699	9.90344	10.4693	10.0235	10.4019	9.14215	9.53574	9.15309	9.96581	9.55365	10.8163	9.65761	9.8184	9.33267	10.0123	10.2507	9.72701	10.1254	10.0028	9.9571	9.89689	9.88021	10.2151	10.3293
MAPK9	1.47e-21	9.67425	9.26746	9.76075	9.26419	9.20078	9.60085	9.33811	9.78447	8.95126	9.45268	9.71586	10.0834	9.25663	9.5093	9.76029	10.9437	9.26822	9.43472	9.84624	9.26142	9.32564	9.48169	9.55314	9.80647	9.12978	9.23405	10.2114	9.43412	9.35487	9.47156	9.13405	9.50147	9.41015	9.56051	10.9836	9.69426	9.14883	9.35234	8.77744	9.45095	9.27003	9.56263	9.25989	9.36643	9.17266	9.73811	9.18867	9.35371
PPP1R14B	1.65e-21	9.92135	10.6186	9.63815	10.6283	9.4424	10.532	10.8647	10.7709	10.6958	9.80087	10.3054	9.24952	10.8367	9.43068	8.97657	8.15431	10.047	10.9998	11.0775	10.9321	10.3923	10.4275	11.0522	10.2193	9.70957	10.7257	9.5449	10.1346	10.2578	10.7663	9.97866	9.33195	10.4825	9.98332	8.56763	9.65972	10.2147	10.3654	11.3715	10.428	10.6992	10.7565	10.8856	10.8076	11.5509	10.2208	10.5021	10.1548
PTTG1IP	1.92e-21	13.2986	13.5442	13.1782	13.0591	13.1039	12.8412	13.2009	13.0839	13.1724	13.1782	12.968	12.8577	13.3298	13.0591	12.915	11.8216	13.1396	13.3239	12.8301	12.8211	13.3239	13.3182	13.2175	13.6397	13.4768	13.8117	12.9497	13.4085	13.2522	13.2342	12.5449	13.4372	13.1139	12.7756	11.6968	13.1293	12.6818	13.4227	13.1448	13.6397	13.2808	13.7064	13.3735	13.0133	13.3239	13.2924	13.3298	13.4505
DYNLT1	2.01e-21	12.6001	12.5359	11.7753	12.6296	12.141	12.8454	12.8495	12.7642	12.4255	12.4255	12.705	11.7199	12.5627	12.4229	11.9173	10.2772	13.0432	12.915	12.1875	12.9	12.7303	12.4826	12.5656	12.2847	12.6429	11.8817	11.8734	12.6987	12.0234	12.1588	11.5817	12.9723	12.3252	11.9883	10.5976	12.4582	12.5449	12.3957	12.4411	11.8796	12.6107	13.1843	11.884	11.7466	12.9852	11.6634	12.6987	12.0583
SH3GL3	2.08e-21	9.34726	7.87155	9.98187	8.55094	10.2909	9.05862	8.03512	8.37791	8.26754	9.14678	9.12796	9.71396	7.86479	8.7718	10.4589	10.4107	8.94031	8.52039	8.38012	8.08801	8.84002	8.33036	7.92708	9.30496	9.36643	7.83807	9.52096	8.83131	9.30547	7.77949	8.30639	8.18256	8.50653	8.46705	10.9653	8.13334	8.03271	7.99082	8.0152	7.90899	9.39529	8.34192	8.47703	7.81667	9.05725	9.17769	8.27595	7.81529
MBLAC2	2.79e-21	7.71721	7.32435	7.86999	7.95415	8.16076	8.33176	8.3331	8.35873	7.87012	8.34554	8.93472	8.65667	8.34567	7.93105	8.87087	9.11624	8.84826	7.31164	7.97047	7.009	8.65531	8.60721	8.07177	8.36581	7.77107	7.32913	8.8381	7.92735	8.41914	6.66377	8.00495	7.53175	8.71781	7.6457	9.10569	8.02135	7.31392	7.94443	7.2993	7.72986	7.64377	7.86614	8.34598	7.42461	7.99551	8.25243	7.7196	7.96863
GMNN	2.94e-21	10.1841	11.071	9.78564	10.8802	10.8693	10.6025	11.0026	10.9947	10.6441	10.1335	10.532	10.6425	10.1678	10.3509	10.2039	9.72366	10.3058	11.2619	10.2519	11.2834	10.5643	11.5302	9.98964	10.3581	10.7421	10.7119	9.79117	11.2418	10.9544	10.7344	10.2216	11.9883	10.6882	10.0936	8.93269	10.6554	10.6012	10.1392	10.4048	10.7184	11.0336	10.4961	9.90858	10.3111	11.0839	9.72941	10.1303	11.4992
FAM73A	3.7e-21	9.81172	9.31763	10.4775	9.09173	10.4323	9.06571	9.08983	9.04335	8.99974	10.3236	8.52963	10.1204	9.56138	9.50645	10.448	10.5474	9.24327	9.06891	9.51831	8.68776	9.69426	9.38606	9.87901	9.66471	9.69164	9.17877	10.2654	9.7561	9.47439	9.30134	9.34319	9.38694	9.23877	9.09473	10.8948	9.67173	8.53929	9.52404	9.31907	8.97918	9.64266	9.61787	9.24224	9.16605	9.47771	9.52609	9.13563	10.2645
TLN2	3.81e-21	8.48199	8.21609	8.32561	7.70219	9.04629	7.83922	7.92392	7.42077	8.13237	9.07777	7.33776	8.7879	8.80127	8.71465	9.30877	9.69249	8.02953	7.67336	7.65545	7.56586	7.80404	9.38328	8.6175	8.90366	8.39691	8.65499	9.51855	7.74577	8.79824	8.21531	8.20556	7.27271	7.46717	8.29208	9.92466	7.93011	6.48976	9.30208	8.35249	8.21568	8.18055	8.08956	8.17393	8.29897	7.63912	8.6363	8.09306	7.79736
PLEKHM3	4.99e-21	9.04103	8.39862	9.27695	8.55853	9.51682	8.35333	8.76181	8.48601	8.19618	9.39497	8.99417	9.27886	8.29481	9.06557	9.60129	10.0401	8.42196	8.57818	8.47038	8.53513	8.64317	8.87736	8.21016	9.05739	8.79758	8.26582	9.5237	8.6276	8.79527	8.21688	8.51458	8.87697	8.85225	8.85988	10.0681	8.73851	8.07177	9.08235	8.82161	8.1694	9.04302	9.12247	8.13583	8.76299	8.69347	9.13956	8.26319	8.34598
POLR2J	6.21e-21	12.4179	11.9188	11.6486	12.217	12.2131	12.9497	12.0961	12.311	12.4743	12.2824	11.9819	12.2847	12.5717	12.5256	11.2284	11.4664	11.9427	12.0567	12.4717	12.4965	12.4639	12.6326	12.4772	12.5359	12.7365	12.444	11.7714	12.7952	12.4611	12.5778	12.7756	12.5502	12.4499	12.8865	11.4253	12.626	12.6643	11.9763	13.018	13.0839	12.4772	12.4611	12.5599	12.3637	12.9237	12.0762	12.2776	13.0591
SEC61A1	7.42e-21	10.5862	11.144	10.5791	11.3523	10.3228	11.3807	11.1154	11.7031	11.6573	10.6176	10.9321	10.2275	11.6286	10.5543	9.57495	9.10605	11.3258	11.9001	11.1885	11.2951	11.3158	11.1831	11.2997	11.0408	10.9431	11.5627	10.5453	11.9202	10.8828	10.5894	10.7247	10.9611	11.135	11.1154	9.42389	10.8138	11.4332	11.053	10.5588	10.9818	10.8087	10.6877	11.2357	11.6275	11.0304	11.2083	11.3922	11.5968
ATOH7	7.62e-21	5.35047	5.28908	4.7322	5.00143	4.71089	5.18118	4.75312	4.95043	5.15946	5.01141	5.49421	6.48336	6.39308	4.92173	6.44292	7.353	5.93447	4.08859	4.76692	5.41714	4.89895	4.09872	5.35838	5.08292	5.51175	6.27065	6.68605	5.92364	4.96968	3.7825	5.36549	5.04486	6.59353	6.02374	8.50279	6.54348	5.57525	4.12919	5.33728	3.94866	6.00532	5.62104	4.65597	5.86446	4.65712	6.50118	4.72928	5.23766
PRKCG	9.49e-21	7.45748	7.18691	7.05742	6.47445	7.3088	7.33299	7.23222	6.76008	7.4898	6.86927	7.47662	8.73473	6.95673	6.6524	8.17218	9.10934	7.16587	6.67739	7.11553	6.95278	6.94671	7.23473	6.03843	7.09304	7.1033	7.21336	7.82789	6.95687	7.21449	7.38395	6.96953	6.932	6.85628	7.27359	9.29401	6.88479	7.08621	7.19164	7.15491	6.99691	7.41514	6.9086	7.10719	6.95976	6.92175	7.12636	7.14136	7.33557
PRSS3	9.92e-21	8.16158	7.36175	8.1137	7.74077	7.80025	8.18889	7.51648	7.22613	7.79412	8.35333	7.55355	8.90552	7.28321	7.97283	8.75855	9.81189	8.21793	7.3443	7.90143	8.38991	7.16674	8.38557	7.59362	8.26054	8.09035	7.77616	8.73421	8.36775	7.94768	7.29852	8.21162	7.45708	7.66363	8.1144	9.52863	7.40221	7.42601	7.08508	7.1178	7.87272	8.03443	7.55319	7.80929	7.84956	7.48366	8.16311	7.77547	7.41654
LINC00086	1.01e-20	8.14534	7.01147	7.60531	7.10232	7.25435	7.88733	7.21433	7.42303	7.2763	7.66573	6.92779	7.79477	7.18472	8.24091	8.63524	10.0394	7.40076	6.44855	7.84796	8.37226	8.55549	8.01097	7.23154	7.93831	8.18268	6.90628	8.54375	7.84145	7.24584	8.36442	7.6004	7.84899	7.45831	9.04603	9.42853	7.65241	8.22064	7.47865	6.22732	7.22626	7.61746	7.03816	7.02186	8.37816	6.87554	8.15975	8.02163	7.65128
KCNAB1	1.08e-20	8.41478	7.43098	8.57725	7.16736	7.72001	8.24315	7.40644	7.88586	7.23681	7.9265	8.36618	8.56163	6.87264	7.45844	9.06412	9.81024	7.23722	7.42601	7.64322	6.86583	7.74967	7.78475	7.39387	8.29123	7.81032	7.20326	9.19766	8.1357	7.89007	7.2887	6.43679	7.65624	7.82326	7.53536	9.93833	7.4285	6.99141	8.36088	6.06796	7.36477	7.72602	7.78672	6.91324	6.79738	7.00629	8.17244	7.82589	7.06135
RAB13	1.14e-20	11.7589	12.5909	11.903	11.8601	12.1708	12.1324	11.9047	11.3827	12.7147	11.9711	11.4311	11.1388	12.7642	11.9202	12.0812	10.0036	12.3583	12.5289	11.8025	11.7093	12.2669	10.7478	13.3406	11.6744	11.8093	12.5534	11.3992	12.3957	12.225	12.9	12.3583	12.896	11.997	12.7337	10.2043	11.9743	12.9497	12.1548	12.111	12.3909	11.9427	12.1508	12.7642	12.5967	12.0668	11.9852	12.6137	11.9095
IGFBP2	1.3e-20	11.8449	13.2009	12.4909	14.1062	9.59719	12.3884	14.0267	13.1238	14.2898	12.2776	10.4611	11.6057	13.7288	11.2645	7.79234	6.45997	14.5488	13.6818	14.2257	12.6227	14.241	13.5369	14.5934	11.7248	13.0042	13.464	11.936	13.0794	13.7603	11.6893	13.4372	13.3735	13.3942	13.5137	8.8763	12.8656	13.8733	12.0527	13.444	13.8568	13.1191	9.06063	13.5595	13.1039	11.1759	10.7404	13.7449	12.0618
TNPO1	1.37e-20	11.6496	11.5544	11.3776	11.7803	11.6433	11.5269	11.6067	11.3397	11.6264	11.0839	11.2508	12.0425	11.4675	11.7161	11.01	10.6339	11.3231	11.0606	11.3767	12.0762	12.1708	11.3776	11.128	11.3846	11.8316	12.1875	11.0377	11.603	11.8899	12.2313	12.3133	11.6634	11.3885	12.1264	10.4816	11.0502	12.1013	10.8601	11.171	11.947	11.5466	11.1178	11.4727	11.9763	11.1742	11.0385	11.04	11.103
GSTO2	1.52e-20	7.24271	6.81221	7.49452	7.05856	7.87216	7.35497	6.53294	6.78254	6.76898	7.29685	6.52362	7.83258	6.92903	6.57782	8.22037	7.67249	6.66067	6.98643	7.40906	7.01254	6.84936	6.37771	6.84923	7.27025	6.90954	6.91794	7.85576	6.79063	7.28555	6.63815	7.02692	6.45857	6.85685	6.89532	8.05777	6.18909	8.26127	7.20429	7.26075	7.23111	7.0799	7.28397	6.2995	7.61656	7.34501	7.80025	6.75089	6.20259
PPP2R2D	1.54e-20	6.74252	6.81613	7.10672	6.54259	7.84796	7.13569	6.75172	6.17502	6.2103	7.83618	8.21294	7.60715	6.65437	6.8074	8.35249	8.7005	6.83456	7.06902	7.01705	6.09772	6.90628	7.36718	7.02213	7.0466	7.77041	6.82574	7.90636	7.07686	7.43647	6.90654	6.22759	6.74843	8.6238	7.20732	8.78454	7.38076	6.43886	7.54746	7.85589	6.52634	6.99613	6.96773	6.35823	6.58301	7.29587	7.61564	6.80125	6.85465
FLNA	1.54e-20	11.6906	11.4737	11.1601	11.6264	11.2551	10.9885	11.5293	11.2172	12.0282	11.5333	10.2376	10.7588	11.641	10.8378	9.07533	8.82265	12.3465	12.8865	11.4263	11.9819	11.3786	10.6593	12.5477	10.64	10.8283	12.6391	11.0538	12.2151	10.7119	11.9729	11.6533	11.6883	10.9148	11.4013	9.0075	11.7803	12.1606	11.2484	11.6772	12.2189	12.0133	12.5387	11.1485	11.8702	11.6391	10.9053	12.0216	12.7952
SPPL2A	1.7e-20	10.8415	10.8934	10.52	10.4896	10.2186	9.88432	10.4368	10.2823	10.7744	10.8245	10.5974	10.442	11.3894	10.6697	9.66937	9.43926	11.1766	10.8866	10.6838	10.7481	9.54888	10.4453	10.7624	10.4673	9.95135	10.848	10.3758	10.1888	10.7904	10.9974	10.5226	10.1688	10.1552	10.8144	9.57729	10.5574	10.6834	10.5429	11.0717	11.1593	10.6604	10.6958	10.8742	10.4215	10.429	10.825	10.886	10.3503
HS3ST4	1.74e-20	9.28974	6.92825	9.82936	6.3639	9.0049	7.93477	6.70666	6.74115	6.74115	8.4986	7.18578	9.53703	7.13719	9.28208	9.49754	10.6306	7.24007	6.99	7.76352	7.20031	7.67794	7.60462	7.28263	8.42481	8.09767	7.6457	9.17266	7.49638	8.6695	6.42932	7.31717	7.1589	7.36798	7.68406	11.2852	7.67006	5.58251	6.98525	6.16742	6.77769	8.25647	7.87192	7.21494	7.50702	7.60726	8.17152	7.55683	7.88342
OPALIN	1.79e-20	10.0166	8.14363	10.904	8.06102	10.2856	9.07356	7.59863	7.64161	7.86669	9.49088	8.33485	10.0791	8.42837	8.46766	11.9188	11.2671	8.28041	7.40427	8.4017	7.77176	8.48356	8.45104	7.75895	9.39411	10.2455	7.6111	10.3143	9.40033	9.82124	7.97852	8.42302	8.58843	8.01652	8.6889	12.2384	9.11392	7.86805	7.52369	8.0014	8.35689	9.65145	7.86276	8.09277	8.4908	8.15606	9.92905	7.64598	8.09249
RTN3	1.9e-20	12.8301	12.1341	12.5387	11.9001	12.4285	12.3856	11.9252	12.9898	12.2871	12.727	13.1448	13.1622	12.4203	12.3929	13.1039	13.5668	12.6035	12.0882	12.6789	12.2049	12.6789	12.6953	12.3321	12.5534	12.4826	12.0148	13.3353	12.1749	12.3806	12.141	12.406	11.9953	12.6953	12.7222	13.5524	11.9694	11.8274	11.7104	12.4203	12.0636	12.5967	12.6953	12.0844	12.4471	12.6326	12.6504	11.8974	12.1303
INPPL1	1.94e-20	10.1664	10.216	9.95282	10.2744	9.87209	10.3249	10.3379	10.2633	10.5899	10.0893	10.0748	10.5525	10.2835	10.1694	9.66584	8.90255	10.4298	10.1853	10.7374	10.2275	10.5223	10.1884	10.4385	9.83291	10.2957	10.4125	9.69371	10.1558	10.3769	11.2409	10.6103	10.0695	10.3532	10.5226	9.5359	9.92227	10.7573	10.5145	10.766	10.8668	10.491	10.4023	10.4453	10.409	10.1648	10.6953	10.3255	10.5981
CDH8	2.18e-20	7.39809	6.3958	7.42243	6.82726	7.0843	6.79324	6.60736	6.52746	6.71222	7.47972	6.78665	8.32157	7.10106	6.59869	8.30258	9.21755	6.90184	6.33237	6.81119	6.76639	6.91964	6.44359	6.88994	7.29519	6.73897	6.69802	8.31672	7.48716	7.23783	6.6352	6.83557	7.78475	7.33599	7.63385	8.54818	6.05194	6.73507	6.4596	6.74892	6.75421	7.00338	6.72859	6.83312	6.73795	7.1506	6.96844	6.58588	6.1126
PTBP1	2.19e-20	9.63343	10.0106	9.27067	10.8126	9.15321	10.0882	10.5504	10.2052	10.4966	9.78689	9.24499	9.06571	10.0735	9.67458	8.9554	7.91682	9.89397	10.3131	9.77934	10.4924	9.72732	9.95769	10.0117	9.79218	9.75143	10.2446	8.83902	10.3054	9.68943	10.2317	10.6431	10.3742	9.82808	10.2909	8.03473	10.0491	10.6887	10.2355	10.581	10.3135	10.0076	9.96922	10.265	9.73407	10.2889	9.72366	10.3123	9.97954
MPPED1	2.59e-20	7.96	7.1856	7.74604	7.66909	7.20091	7.23392	6.74653	7.0503	7.24484	8.00847	7.43531	9.00857	7.13638	7.38089	8.57396	9.38134	7.74453	7.09658	7.01225	7.50831	6.98933	7.28995	6.36548	7.43865	6.70348	7.24663	8.62888	7.6471	7.67512	7.30136	7.65181	6.95237	6.53393	8.06581	9.43819	6.78567	6.48584	7.44667	7.05391	7.40657	7.51202	7.30421	8.04161	7.32246	6.92276	7.64798	7.38502	7.56996
RRM2	2.68e-20	10.2707	10.0974	8.48744	11.0408	7.40759	10.4323	10.9959	11.616	9.88662	9.05502	8.14534	9.79525	10.7206	8.30705	7.89168	6.75766	9.73407	11.0269	9.59227	11.3355	10.137	10.6887	9.92316	10.3728	10.6488	10.8577	9.34777	10.9925	11.0348	9.83968	11.5056	11.6325	10.3291	11.1759	7.47292	10.2329	10.6262	7.77351	10.3347	10.9504	10.3054	9.33098	11.111	9.50158	10.8686	9.3069	10.1337	8.41724
SYT7	2.85e-20	6.61627	5.41254	6.38991	6.18973	5.83645	6.6781	6.15434	4.92095	5.73464	6.56006	5.57903	6.69365	5.72421	5.92214	6.20909	6.79406	5.89796	5.86899	6.2754	6.30337	5.7728	6.27694	5.79032	6.05371	6.02109	6.11819	6.85124	6.0608	5.56235	6.12233	5.75327	5.40732	5.52892	6.22701	7.41117	5.42095	5.96047	5.65906	6.18934	5.56235	6.85585	5.98047	6.32571	6.14812	5.80123	6.1625	5.33776	5.70875
NDFIP2	2.92e-20	9.86311	9.76842	10.1485	9.62393	9.9036	10.2856	9.78378	9.9954	9.90555	9.89528	10.2305	10.1574	9.89605	9.65546	10.327	11.3158	10.2633	9.26335	9.40586	9.91794	9.74956	10.2683	10.1011	9.95563	9.30327	9.66361	10.6799	9.35403	9.80475	8.8976	8.55758	9.04278	10.245	9.85293	11.121	9.65075	9.36234	9.40929	9.36383	9.61436	9.56532	9.66679	9.70251	9.43703	9.38579	9.55149	9.9689	8.98188
PDE1A	2.97e-20	8.0879	6.01033	7.89796	6.57145	7.45241	7.83576	6.7652	7.02546	6.06207	7.63698	5.96553	9.00504	6.14383	7.69307	8.76613	10.1433	7.50237	6.79469	7.13973	5.94532	7.22146	6.9904	5.49421	7.99252	6.9051	6.5487	9.68039	7.46766	7.74464	5.97827	6.27694	5.85524	6.53137	6.80798	10.1826	7.01498	5.91775	10.2535	6.9656	6.05071	7.7144	7.26553	6.54164	5.69316	6.64605	7.84721	6.87755	5.41201
PRRX1	2.99e-20	10.6161	10.4816	10.0032	10.7284	9.68107	10.6996	10.3484	10.1389	9.93716	10.6046	10.7377	10.3611	11.0668	11.111	9.53794	8.64192	9.74292	11.7952	9.83391	9.00051	9.74637	10.0342	10.3166	10.1373	9.7489	10.7216	9.44194	10.3593	10.3879	11.3049	8.48265	10.256	10.9646	9.65012	8.32838	10.6609	10.5289	9.63429	11.3167	10.8432	10.6963	11.0717	11.1902	10.8408	10.4302	10.9565	10.013	10.9694
MAP2K4	3.44e-20	9.85223	9.30149	9.82793	9.48349	9.17666	10.0043	9.17927	9.00236	9.36905	9.50264	9.85541	10.318	9.49228	9.34761	10.1112	10.9431	9.74575	8.94646	9.4227	9.33039	9.54718	9.4256	9.87663	9.76413	9.34109	9.05169	10.3046	9.32462	9.62424	8.8628	9.30941	9.48292	9.66665	9.47018	10.9431	9.43734	9.24341	9.47466	9.22693	9.35984	9.29891	9.73652	9.29073	9.6904	9.48441	9.27681	9.35462	8.78145
NEUROD6	3.47e-20	7.1873	4.85758	7.19922	5.62051	5.69292	6.46436	6.2225	5.61784	5.61079	6.89066	4.86314	9.46916	5.43506	4.77197	9.35221	10.0056	7.03417	4.70879	6.18401	5.66046	5.78252	6.50803	5.49231	8.04244	6.32587	5.99851	8.00549	6.17569	6.92523	5.28181	6.87769	5.21042	5.01408	3.987	10.7666	4.9526	6.27935	5.9168	5.73043	5.22518	7.11586	6.31399	5.66383	6.53697	5.11298	8.96796	5.8852	5.66829
AMN1	3.55e-20	9.03215	8.28852	9.68505	7.53315	9.31066	8.79864	8.41349	9.09497	8.53288	9.26266	9.38231	9.10605	8.73226	9.40849	9.97717	10.5415	9.59623	7.86096	8.51154	8.43287	9.17644	9.11084	8.68472	8.91483	9.20646	8.05495	9.64297	8.63152	8.83448	8.28954	8.85473	8.79646	8.98905	8.46248	10.5362	9.40733	8.04975	8.44128	7.99501	8.36174	8.9205	9.18009	8.37463	8.70142	9.05937	9.61436	9.07936	7.9561
ZC3HAV1	3.72e-20	9.858	9.59719	9.5304	9.69771	10.1888	9.90831	9.79525	9.26992	9.66181	10.2056	8.89425	10.0869	10.12	9.88291	9.25191	8.37336	9.92781	10.3781	9.97776	9.80087	9.76776	9.92905	9.88792	10.115	9.51769	9.98257	9.35601	9.58595	9.89149	10.3111	9.85763	10.0771	10.0523	10.3777	8.19291	10.5211	10.1511	10.575	10.2515	10.5189	9.60098	9.9292	10.0408	10.3786	9.68318	10.3074	9.83477	10.3742
KIAA1033	3.75e-20	10.9624	11.072	11.3176	10.4765	11.1132	10.815	10.5883	10.6081	10.6636	10.4366	11.0515	10.4873	11.2203	10.9824	11.0304	10.5867	10.877	10.4318	10.7887	10.0822	10.8105	11.0253	11.0416	11.0451	10.8524	11.1676	10.7841	10.64	10.9667	10.4673	11.0668	10.5098	10.1967	10.8456	10.3989	10.4807	10.2047	10.3486	10.6846	10.2731	10.8524	10.286	10.4076	11.1759	10.3742	10.4563	11.0984	9.72941
MAST3	4.11e-20	10.0879	8.30463	10.4896	8.23816	10.7114	9.80281	8.37764	8.09249	8.83226	10.5339	8.74606	10.736	8.17292	9.87041	11.0416	11.3176	9.32552	7.82421	8.7749	8.1863	8.8298	8.92559	8.36364	9.91094	8.90524	8.38624	10.994	9.16247	9.81537	6.93385	8.25474	8.28401	7.99766	9.5106	11.5187	8.42005	8.46227	8.05118	8.73688	8.70747	9.81868	8.61472	8.76511	9.00504	9.28702	10.1072	8.36199	8.64304
HIF1A	4.15e-20	13.5907	13.6082	13.2009	13.5907	13.2175	13.2175	13.5668	12.9631	14.0659	13.7961	13.5907	13.2117	13.769	13.7064	12.9769	12.2799	13.1083	13.8455	13.2175	13.2924	13.3804	13.8995	13.5988	13.3735	13.674	13.7449	13.1083	13.7603	13.2634	14.241	13.4085	13.2117	13.4085	13.3239	12.3252	13.6322	13.8291	11.9202	13.3406	13.4161	13.444	13.5821	13.5988	13.7372	13.0938	13.3239	13.5907	13.4572
UBR3	4.92e-20	9.45517	9.33025	9.87429	8.78287	9.78416	9.14715	8.97319	9.17823	9.01534	9.67329	10.146	9.43018	9.44512	9.40054	10.1529	10.2735	9.81669	8.89843	9.20187	8.66605	9.61059	9.87864	9.28166	9.52467	9.69974	9.27656	10.053	9.23215	9.61028	8.67872	8.52308	9.01222	8.4908	9.49976	10.5348	9.54404	8.25107	9.31122	8.99607	9.17794	9.32127	9.54461	9.06891	9.20463	9.40033	9.43902	9.04603	8.89193
ABCA1	5.05e-20	11.7146	11.0584	11.128	11.1185	11.5755	11.5388	10.7268	10.6625	11.4041	10.9129	10.6171	10.0102	10.9632	11.4698	10.2727	8.23208	11.8675	10.9792	11.2435	10.4611	11.9329	10.0815	11.1357	11.0921	11.1919	11.0059	11.1653	11.1334	10.9856	11.585	11.131	11.6857	10.6257	10.5569	8.97987	11.0317	10.8444	9.52639	11.6945	10.7767	11.2834	10.4329	10.1097	11.3687	10.691	10.321	11.0279	10.8093
ATL1	5.71e-20	11.314	9.41073	11.2269	9.48758	10.8941	10.7981	9.45727	10.0297	9.18344	10.9034	11.1372	11.9909	9.95656	9.99763	11.9441	12.6609	10.3576	9.64954	10.3219	10.0169	10.9309	10.3168	10.1197	11.364	10.691	10.4215	11.8702	10.6625	10.6289	9.12127	9.38606	10.1097	9.93138	10.3944	12.5289	10.0017	9.58489	11.6757	10.286	9.97745	10.8668	10.8847	9.41671	10.0896	10.9353	10.128	9.85393	9.87041
CES4A	6.41e-20	4.98711	4.37019	8.49196	4.86234	6.03777	4.93027	3.89836	3.15563	4.9019	5.62129	4.76914	4.70583	4.71308	5.01629	7.29371	6.98089	5.54052	4.3335	4.50039	4.9979	4.52285	4.72545	4.01491	5.68195	4.80366	4.9526	4.39723	3.74201	4.67713	5.16247	4.29887	4.45853	4.6645	5.02783	8.44804	4.10922	4.93521	5.04802	4.67975	5.00573	5.28541	4.92443	4.30887	5.30861	4.60594	5.25467	4.56107	5.13985
STYK1	6.78e-20	6.75025	6.00027	6.30856	5.50345	5.78325	5.9168	5.66675	6.76843	3.17209	6.57205	6.33019	7.00338	5.57247	5.46963	7.54251	8.52921	6.66233	6.04227	6.56766	5.06751	5.4188	6.20888	6.02545	6.18215	5.7162	6.16196	7.50198	5.82059	6.31959	5.85264	6.12956	6.4854	6.35002	6.53393	8.18672	5.1093	5.81855	5.911	5.09957	4.94674	5.97581	6.15737	5.44109	5.87461	5.43734	6.42462	5.38693	5.72613
F2R	8.67e-20	9.51432	10.2126	10.105	10.2758	9.31399	10.951	10.2698	9.94328	11.4218	10.2465	9.45387	9.90256	9.67554	10.2174	8.85813	8.0434	9.29151	10.8728	8.87619	10.1861	9.97542	9.65502	10.1238	9.90956	10.083	10.8456	9.2924	9.77108	9.65582	10.0764	11.2869	10.6745	9.46412	10.1193	8.34433	11.646	9.2924	12.81	10.0628	10.934	10.5443	10.8325	10.5766	9.67979	10.018	9.56793	10.6077	9.30825
KCTD4	8.78e-20	6.95237	5.88851	7.13973	6.8661	7.96228	6.80259	5.01342	4.91749	6.44612	7.12613	8.57599	6.92653	5.1155	6.90641	8.33101	8.27815	6.97395	5.34927	6.24197	6.52284	4.86435	6.66593	5.56569	7.60763	7.03385	5.18118	7.40869	5.21524	7.79982	4.29211	5.00363	5.04179	7.83749	7.01175	8.57371	6.15391	4.59256	5.54586	4.87817	4.53927	6.59157	5.38869	6.44687	6.15737	7.07891	6.9244	5.45396	4.42859
TMEM132D	8.81e-20	8.49172	7.3701	8.38919	7.56574	8.21701	8.2183	6.55725	7.68615	7.20714	8.30342	8.09063	9.03645	7.42693	7.7126	9.30371	10.2903	7.99743	7.32819	7.28511	7.57761	7.513	7.53888	8.11014	8.29816	7.22453	7.67965	9.40021	8.0981	7.83872	7.66296	8.47408	7.53339	11.4003	8.69965	9.76792	7.63015	7.94677	7.49081	7.95388	7.88169	7.56612	7.49915	7.69	8.2575	6.86754	7.69506	7.85253	6.71696
YBX1	8.9e-20	12.3713	12.9723	12.113	13.0432	11.8391	11.8539	13.0277	13.5	12.81	12.2893	11.9694	12.4156	12.7682	12.113	11.6508	10.6273	12.727	12.8911	12.3828	12.7082	13.157	12.7184	12.8495	12.9051	13.2579	12.5717	12.141	13.3475	12.9	13.0794	12.8538	13.0794	13.1724	12.8454	11.0019	12.6359	12.6001	11.6785	13.0432	12.5778	12.5359	12.8824	12.9769	12.2468	13.1238	12.5256	12.8301	12.7756
FABP3	9.08e-20	7.52192	7.68801	7.48396	6.75061	7.54282	7.76103	6.94195	7.40063	8.03244	7.56574	7.01814	8.07331	7.69921	7.01622	7.64407	8.47294	7.77107	7.12075	7.6087	6.40638	7.67348	7.72182	7.52612	7.1856	7.08796	7.40989	8.09063	7.3057	8.30678	6.26549	7.04776	6.02527	6.91501	7.58896	8.42014	6.30674	7.47758	7.28747	7.46197	6.32873	7.18011	6.60433	6.86384	7.28347	7.27946	7.60334	6.62097	6.96499
SVOP	9.29e-20	7.61746	6.37737	6.84294	5.36835	5.80002	7.15526	6.45568	6.83908	6.2137	7.56473	8.50007	9.12042	6.99369	6.85792	9.27848	9.46269	6.65692	4.6296	6.94011	6.31823	7.05203	6.71187	4.58474	7.48557	6.85213	5.9439	8.50711	7.58066	7.0475	6.75922	6.90741	5.94601	6.62279	7.2314	10.0793	6.41015	6.12547	5.911	7.39941	5.40592	6.50253	7.08268	5.93788	6.99673	6.29769	7.05275	5.49294	5.30468
PBK	9.34e-20	9.62583	9.32592	7.57895	10.6262	7.09658	10.1868	10.7981	11.3523	9.13615	8.63296	7.56778	10.3554	9.82984	7.84475	7.66296	4.76342	9.44194	9.71706	9.37796	9.76524	10.778	10.6797	9.32636	10.4693	10.8847	10.2307	8.51188	11.1492	10.7333	9.1218	10.025	11.6136	10.5075	9.65612	6.12973	9.39627	9.39959	6.49507	10.7949	8.99447	8.79604	9.08764	10.7827	8.41995	11.2253	8.73107	9.88646	8.32313
PCLO	9.67e-20	8.45994	6.41563	8.08761	6.53137	7.44797	7.97687	6.10172	6.48459	6.69949	7.97458	7.24255	9.03403	6.70236	7.76079	8.19841	10.25	7.33662	6.47533	7.68219	7.91889	8.46651	6.9846	6.38045	8.1991	7.44331	6.42302	9.32736	7.23237	7.6707	7.07278	6.83217	7.79849	6.65071	7.3594	10.2	6.47533	8.30639	7.85662	6.0281	6.71167	7.95306	6.73395	7.38582	7.54034	6.09575	8.0564	7.40773	5.90074
RP11-710C12.1	1.04e-19	7.20258	6.515	7.51052	7.93165	7.37946	6.91919	7.56322	6.43002	6.5446	6.80378	5.84448	7.63618	6.94833	6.22127	8.27134	8.55634	6.57919	5.49197	6.1913	6.44277	6.5404	7.37142	7.71248	6.52325	6.63665	6.02319	7.11703	6.29387	7.54309	6.04679	5.61758	6.6524	7.09645	6.87051	9.27681	5.7278	5.53694	7.94826	4.70768	6.31974	7.05654	5.75158	7.8347	5.20824	6.33284	7.0809	5.88868	6.58888
C5orf30	1.05e-19	10.2147	8.4244	10.238	9.25094	10.28	10.0292	9.27848	9.50086	9.25249	9.66395	9.96219	10.0294	9.11111	9.17114	10.3858	10.9992	9.31965	9.22693	9.2512	8.57143	9.7209	10.6996	9.02434	9.80087	9.95957	9.12625	10.3421	9.43734	9.78074	9.05862	9.74507	9.84544	9.55545	10.2212	10.8313	9.8157	9.62832	9.44526	8.58678	9.50762	9.59746	9.99879	9.35258	9.11404	9.6208	9.58657	9.32025	8.78942
ARPP19	1.08e-19	12.5387	11.6671	12.0495	11.1885	11.8494	11.6968	11.1147	11.7361	11.5187	11.8525	12.4909	12.4772	11.9047	11.903	12.705	12.7642	11.8716	12.0998	12.0882	11.485	11.3755	12.1013	12.025	12.3856	11.7006	11.801	12.4033	12.3155	11.9548	11.5466	11.6659	11.6871	11.9594	12.0058	12.705	11.5602	10.7494	11.0883	11.6264	11.6696	11.9377	12.2893	11.7361	11.0013	12.0495	11.7952	11.5785	12.0216
HMG20B	1.12e-19	8.59225	9.17823	8.77398	10.0324	8.87539	9.48542	9.96791	8.94367	9.81624	8.84134	8.71324	8.52067	9.28222	8.84849	7.96259	7.44797	8.60385	8.81822	8.94996	9.74795	8.72542	9.37465	9.24224	8.32731	8.74513	9.274	8.10733	9.30645	8.86932	9.54949	8.97863	9.18544	8.15313	9.35831	7.80861	8.86374	9.29196	8.12146	8.7794	9.22767	9.361	9.41671	9.5132	8.91182	9.34761	9.0625	9.31385	9.30386
CACNG3	1.18e-19	6.53039	4.27431	5.17329	4.0328	4.87515	5.60745	3.91133	3.91729	4.06402	7.32544	3.88375	9.29959	4.9979	3.74626	9.15682	10.3532	5.37183	4.52184	5.30829	4.68625	3.99746	5.20346	4.22795	7.16268	3.66364	3.98033	9.04908	7.05275	5.63228	4.5413	3.72382	5.21042	4.22795	7.62118	10.437	3.79807	3.93114	3.75727	3.6909	3.76332	5.41654	3.7179	3.857	4.78484	4.20127	4.64576	4.15557	3.89548
GDA	1.25e-19	9.89605	7.30686	9.09971	7.297	8.60538	9.56383	7.14324	8.00998	7.53339	9.52849	7.92226	10.9148	7.64229	8.75284	10.3148	11.5602	10.9701	8.16539	9.26746	8.08204	7.41211	8.33283	7.29839	9.63086	8.04661	8.175	10.4785	9.12058	9.07356	8.07743	7.51621	7.8531	7.17466	8.66453	11.4013	8.43086	9.54865	7.59697	7.35604	7.70452	8.95488	7.75679	7.35271	8.48101	7.84258	9.27003	7.98298	7.59917
PRKD3	1.26e-19	8.69101	9.29182	8.89994	9.79878	9.24144	9.42069	9.77202	8.84862	9.44781	8.7714	8.88932	9.28907	9.36292	9.53344	8.37524	7.77124	8.63904	9.23908	8.67498	8.927	8.73651	9.28907	9.56616	9.02762	8.90978	9.37545	8.64087	9.26851	8.99551	8.67821	9.15266	8.75543	9.20495	9.28481	7.35313	8.89504	9.13942	9.96791	8.91312	8.60617	8.59656	9.30258	9.19962	8.86793	8.72082	8.87642	9.15644	8.85001
C12orf76	1.27e-19	9.45194	9.09675	9.75348	8.94145	9.85865	8.96049	9.08021	9.17062	9.53483	9.11179	9.6213	9.50384	8.93818	8.87309	10.1291	10.3198	9.16551	8.58397	9.072	9.21593	9.71396	9.36464	9.34667	9.35221	9.62866	8.8963	9.51886	8.8159	9.56826	7.69441	8.92531	9.58996	8.78059	8.85813	10.5046	9.24007	8.38844	8.71992	8.90057	8.617	9.25857	9.26836	9.0602	8.09361	9.26084	8.9518	8.80352	8.31446
LRFN2	1.44e-19	4.13499	4.08376	3.89374	3.78543	3.37962	4.2811	5.69522	3.26235	3.93568	3.71	4.154	5.0975	3.98033	3.94058	3.3369	5.7408	2.2043	3.37821	4.39763	3.07986	3.78058	4.29887	2.69811	3.68581	3.01728	3.57263	4.79934	4.65351	4.01988	3.09522	3.66025	3.69634	3.2186	4.00699	5.42841	4.31114	4.91265	3.44372	3.08746	3.70905	4.55859	3.41868	3.80839	4.88469	3.65438	3.82193	4.19029	3.32996
SSR4	1.63e-19	12.0651	12.4312	11.8867	12.3278	11.8825	12.6107	12.4179	12.6609	12.7989	12.5026	12.945	12.3492	12.3559	12.2776	12.2518	11.3185	12.4131	12.3086	12.8577	13.4924	12.4386	12.5839	12.5026	12.4529	12.5909	12.4909	11.884	12.6035	12.7756	12.6953	12.6227	12.2358	12.4179	12.4365	11.635	12.8865	13.4572	12.3982	12.9275	12.7832	12.5839	12.4798	12.7365	12.9	13.0083	12.3637	12.6679	12.0567
NUSAP1	1.66e-19	10.618	10.8035	8.80739	11.1117	7.4067	9.60223	11.2008	11.0104	9.78168	9.18635	8.15131	11.1454	10.1558	8.60222	8.07597	6.48568	9.61538	10.478	9.52578	10.763	9.42238	10.7163	9.65761	9.88808	10.0159	10.7952	9.53497	11.1766	11.0317	10.8588	11.414	11.5077	10.0846	10.4984	7.14053	10.112	10.7921	7.87928	10.5206	10.188	10.083	9.23511	10.9565	8.9385	11.4727	9.41606	10.1629	9.69054
IGFBP7	1.7e-19	13.3531	13.1843	13.6545	12.9589	13.2226	12.9402	13.0692	12.542	12.7552	13.3673	12.7952	11.3514	12.9898	13.2009	11.9729	11.3837	13.2634	13.8823	13.3298	13.769	12.3465	13.089	11.3176	13.2697	12.8495	13.7288	12.7952	12.7756	13.1238	13.3804	12.654	13.157	12.2089	12.7952	11.1766	13.2175	13.064	13.4768	13.0379	13.9522	12.6953	13.4768	13.4227	13.8995	12.9949	12.8495	13.8568	13.3475
KCNV1	1.7e-19	6.86597	7.07619	6.94422	6.76386	6.33298	7.22764	7.18049	6.79049	6.87569	6.57468	7.1339	7.37662	6.61078	3.99447	8.1189	8.56605	6.50318	6.52344	7.5302	6.97589	6.31974	6.86318	7.78332	7.32974	7.10139	7.10245	7.39105	7.2902	6.97772	4.61196	6.21317	5.97808	7.10245	7.1635	8.86768	6.30674	6.29806	7.66922	6.90891	6.74309	6.26611	7.09505	6.90586	6.47533	6.80139	7.04433	7.5916	6.34823
SSTR1	1.72e-19	6.16742	4.88404	6.21498	4.7369	6.39394	5.46519	4.88618	4.15	5.16104	6.43063	5.89459	6.1776	5.75104	5.4188	7.74532	8.03921	5.71136	4.04901	5.175	5.14019	3.98122	5.78252	4.04799	5.87191	5.15094	4.62039	7.02226	5.08414	5.1999	4.24099	3.58456	4.18601	7.79749	6.39973	7.9438	4.70115	5.00483	4.52359	5.30414	5.13587	5.498	5.87971	6.05904	5.36438	5.66125	5.62676	4.09059	3.89548
KIAA0101	1.8e-19	10.428	10.3445	9.35601	10.6963	8.90456	10.0815	10.9148	10.7431	9.96614	9.47073	8.83131	10.5429	10.1768	8.88078	8.77439	8.69039	9.75207	10.7252	9.24022	10.8668	10.1814	9.34042	9.62193	10.387	9.78529	10.7227	9.69959	10.7853	10.269	11.2008	11.4469	11.6573	9.77691	11.0554	8.61916	9.83408	11.2317	9.05539	10.3998	10.5255	10.0896	9.21002	10.4411	9.79341	10.7045	9.67376	10.0315	9.04363
ERC2	1.86e-19	9.59227	8.81525	9.00155	7.21238	7.29752	8.47108	7.31705	8.89073	7.21819	9.1888	8.56549	9.89528	8.67612	7.59667	9.83205	11.0967	8.98974	8.53083	7.88303	7.67691	8.6175	7.92282	8.61142	9.87883	8.76299	8.17292	10.4656	8.73065	8.51823	7.20906	5.18359	7.6238	8.18105	8.41409	11.2877	7.83258	6.54105	7.64814	7.97785	7.80038	8.78991	8.98317	7.15315	8.07642	8.77007	10.3385	7.64079	8.37226
DCTN1	1.96e-19	10.9667	10.5904	11.3427	10.865	11.4191	10.7704	10.4818	10.904	10.5944	11.1388	10.8367	11.3258	10.7152	10.8432	11.409	11.6844	10.8313	10.5934	10.5087	10.523	11.2365	11.0266	10.4924	11.0831	11.0225	10.8011	11.4404	10.7921	11.0327	10.736	10.0643	11.0228	10.791	10.8325	11.9867	10.6152	10.3708	10.1437	10.7735	10.6025	11.0445	11.4332	10.2756	11.0883	11.115	10.7904	10.4038	10.6887
WNK2	1.97e-19	6.36006	6.76623	6.34097	6.50561	6.67015	6.47955	6.36595	6.98731	6.6812	6.81708	6.75172	7.80455	6.56351	6.59369	7.59797	7.94665	6.78125	6.9164	6.50543	6.97682	6.64085	7.05391	7.02821	7.21494	7.21041	6.90715	7.29007	7.13328	6.97589	6.83217	7.61857	6.45083	6.21269	7.27904	7.92974	6.63483	6.56572	6.73428	7.06185	6.2754	6.77852	7.27084	6.53818	6.44508	7.19185	6.60273	6.76341	6.94211
SYNJ1	2.09e-19	9.47836	8.61033	9.43847	8.89818	8.95675	9.20281	9.07279	8.79296	8.7737	9.40586	9.49228	9.4491	8.47515	8.77744	9.63399	10.605	9.10024	8.86347	9.15321	8.44663	8.93764	9.52982	8.75933	9.32607	8.72434	8.96863	10.1707	9.28307	9.34276	8.30836	7.70023	8.8122	9.24372	8.65222	10.4736	8.55267	8.85733	8.37172	9.07256	8.71875	9.31808	8.93907	8.68709	8.37972	8.23399	9.36234	9.06814	9.21141
LPP	2.14e-19	10.1614	10.4943	10.0477	9.58813	10.2122	9.66921	9.57495	9.5267	10.0301	10.2523	9.40793	9.50441	10.226	9.98072	9.44567	9.25824	9.94738	10.657	9.37545	10.1444	10.3416	9.84356	10.2186	10.3438	9.94398	10.442	10.0881	9.97307	10.0301	11.2936	10.1184	10.408	9.87901	10.1676	9.44512	9.9663	10.3509	10.8954	10.7031	10.3722	9.99035	10.3244	9.92683	10.3139	9.29839	9.88127	10.3062	9.97884
KIAA1045	2.36e-19	9.01316	6.72768	8.31072	7.14554	7.93383	8.07515	6.77184	6.62375	7.43518	8.38218	7.12923	9.63194	6.75672	7.38184	9.20187	10.6211	7.64048	6.9789	7.77041	6.69623	7.95531	7.79541	6.95792	8.24835	7.18246	6.5142	9.62357	8.30165	8.04442	7.4921	6.90682	7.49885	7.92952	7.99837	10.7671	7.35044	6.82127	7.25461	7.07978	6.6394	8.42409	6.95481	8.27789	7.71803	6.8627	8.31289	7.61284	7.04588
PPP4R4	2.41e-19	7.01326	3.54391	5.61033	3.97936	5.95137	6.53715	2.5292	4.8008	4.38413	6.39723	4.86674	7.26651	4.28709	5.77035	7.71774	8.24235	6.54569	5.37279	6.43472	5.04082	4.89895	5.65729	5.58397	6.35588	4.76817	5.19905	7.61271	5.98784	6.30531	5.28181	4.10657	6.07586	5.00665	5.97484	7.70219	5.34488	4.96192	3.75064	4.44988	6.11741	6.01202	4.83504	5.61198	5.39015	3.97827	5.84987	6.55198	6.91107
BCL2L12	2.43e-19	7.7693	7.88827	7.90269	9.13405	7.41996	7.63245	9.03866	7.65328	9.02155	7.72739	5.99037	8.13093	7.78183	8.02061	6.43568	7.02114	7.48689	8.24686	8.17991	7.85466	8.0369	7.26815	8.69388	7.55938	7.16235	7.9283	7.24898	8.92014	8.22451	8.23317	8.76939	8.35039	6.32698	8.30639	7.16284	8.04327	8.85921	8.15211	7.52217	8.37751	7.45776	7.09001	8.03345	8.15571	8.30573	8.41187	8.15963	9.14843
C1orf216	2.5e-19	10.0235	9.59115	10.0606	9.50645	10.206	9.69715	9.69191	9.9859	9.46137	10.318	9.40095	11.0906	10.1403	10.0937	10.4816	11.3223	10.1384	10.1358	9.87663	9.56915	9.37581	10.1703	10.0649	10.5619	9.95836	10.2355	11.0921	10.013	10.2179	10.3632	9.75792	9.23325	10.2836	10.5448	11.2542	9.92949	9.61512	9.88923	10.0972	10.1244	10.3654	9.51515	10.108	10.4361	10.0948	10.4249	9.7489	10.638
KIAA0513	2.53e-19	9.03838	7.72751	8.47282	6.79205	8.02759	9.1089	7.02032	7.81542	6.96808	9.02407	7.54309	9.36697	6.71504	8.1189	9.53378	10.657	8.3823	7.65661	7.91971	5.89312	7.64149	8.25578	7.89007	8.98781	7.94957	7.58786	9.65188	8.11057	7.9407	6.92226	7.31886	7.42461	7.97891	8.90793	10.7588	7.89652	8.28226	7.84675	7.65871	7.25961	8.81389	7.56843	7.77492	8.74223	7.81265	8.72108	7.26108	7.70452
RASGRF2	2.62e-19	9.11569	7.74796	9.26335	7.41047	9.51597	8.47983	7.40786	7.01212	7.74894	8.84424	7.25015	9.70636	7.72148	8.54089	9.70829	10.2966	8.63307	8.33662	7.60579	6.95342	7.01212	7.96485	5.99649	8.50503	7.92817	7.39029	9.90765	8.03271	7.95266	7.31074	7.85429	7.16628	8.50386	8.05074	10.1534	7.91779	7.11344	10.2941	6.94658	7.32659	8.09987	6.92768	7.70667	7.23953	8.23334	8.43922	7.72208	7.32234
CEBPD	2.77e-19	11.5731	13.1622	12.254	11.3912	12.0795	12.4772	11.4479	10.0259	11.646	12.9769	9.84624	10.1481	13.1139	12.0095	11.0967	10.1258	12.6359	12.4611	12.4156	12.7721	11.9694	10.9003	12.7082	12.1467	10.7478	12.9051	12.2427	11.7266	12.1708	12.8824	11.8406	12.5449	10.7615	11.515	10.0626	11.8796	12.81	11.5731	12.4529	12.5717	13.0083	11.0578	11.9427	12.6227	11.5602	12.136	12.6887	12.0527
PLTP	2.82e-19	12.7404	13.3182	12.2647	12.3155	12.1933	12.105	12.0828	11.6496	12.217	11.903	11.6573	11.1051	12.5079	12.6789	10.3033	10.3445	13.2522	12.1303	12.4554	12.5105	12.834	11.6906	12.5564	11.3239	10.9404	12.0547	12.8495	11.3355	10.7946	12.2882	12.311	12.7303	9.64593	12.2384	10.2626	12.4386	12.5809	11.2869	11.3679	12.5871	12.6165	11.9867	12.7147	13.1191	11.2179	12.0408	12.5477	11.9236
HLA-C	2.91e-19	13.7526	14.1619	13.9403	13.9522	14.1766	13.4021	13.8823	13.4372	13.0938	13.4768	13.4924	13.7145	14.0023	13.8655	12.8454	11.8631	13.787	13.9522	13.9625	14.3427	13.4505	13.0938	13.9729	13.8455	13.1396	13.9625	13.5073	13.7214	13.4021	13.4505	13.7145	13.6644	13.5907	13.464	11.9329	13.444	13.7214	14.0393	13.8911	13.9934	13.4372	13.7372	13.8733	13.5821	13.6322	13.8291	13.4924	13.1897
SH3GLB2	2.91e-19	8.44009	8.29037	8.71931	8.4164	8.78287	7.61298	8.35641	8.07145	8.02927	8.38073	8.28277	8.91987	7.64639	8.1813	8.94285	9.46301	8.38206	7.92801	8.30451	8.06552	8.11014	7.98607	7.28789	8.40818	8.50231	7.94493	8.50279	8.19737	8.10039	7.79901	8.3204	8.22805	8.22792	8.18641	9.29781	8.24871	7.76266	9.09222	8.47539	8.46359	8.8963	8.34665	7.87037	7.43227	8.42547	8.14889	7.61076	7.97487
KIF20A	3.04e-19	8.89425	9.05901	7.1057	9.37694	4.81004	8.51032	9.61815	9.87096	7.80579	8.46954	3.72166	8.31525	8.91326	4.78915	4.46815	3.04978	8.27095	9.78447	6.30449	8.86768	8.59845	8.92338	8.23377	9.11033	9.01234	9.38496	8.43173	9.07438	9.51831	9.44866	9.19737	10.3598	8.84532	9.34924	4.05729	8.60076	8.79527	6.7187	8.265	9.01655	8.81706	7.93026	9.31845	8.31045	8.88089	7.96285	8.33721	7.70294
PRDX4	3.19e-19	11.4698	12.0742	11.4698	11.9988	10.9258	11.9015	12.2069	12.2069	12.1708	11.2148	11.7053	11.484	12.1089	11.3427	10.953	9.83514	12.354	12.5809	12.2027	13.2281	12.2557	11.3992	12.5166	11.7452	11.4675	12.3133	11.3902	12.401	12.113	11.0782	12.2027	12.3686	12.4909	11.7006	10.1154	12.4411	13.2058	11.9531	11.9377	12.2313	11.756	11.6445	12.4156	12.0583	11.958	11.5056	12.4798	12.2229
MFSD4	3.25e-19	7.85362	6.20529	7.65116	5.84878	7.37521	7.73134	6.03434	6.96899	5.89839	7.89861	7.06119	8.91722	6.5666	7.28071	8.95411	10.2504	7.03887	6.44933	7.31361	5.74197	6.27421	7.56447	6.70146	7.82938	7.72471	6.35042	9.3826	7.40356	7.7936	5.60161	5.97769	6.16126	6.78731	7.83361	9.71311	7.15633	6.3567	6.10383	5.37783	6.31258	7.42409	6.0163	6.80769	7.07655	6.48336	8.19645	7.08783	6.51721
PAK1	3.38e-19	9.40081	7.9617	9.072	9.29563	8.91694	9.33938	9.2091	8.86793	7.88422	9.4236	7.35286	10.1614	8.63034	9.04125	9.79772	10.8929	9.07019	8.57929	8.94015	8.91326	8.60235	8.6687	8.15029	9.43762	8.75805	8.10542	10.3291	8.82279	8.96456	7.80627	7.43785	7.72678	8.57857	9.21726	10.877	8.36025	8.28329	8.91031	8.07021	8.03526	8.97809	8.1134	7.86386	9.09473	8.00561	9.15644	8.37668	8.71944
RXFP1	3.47e-19	7.10068	4.71013	6.3145	6.80276	5.97749	6.51611	6.73076	4.85273	5.7762	6.26528	6.2191	8.40007	5.43202	5.75532	7.69628	9.16365	6.64479	5.95613	6.09792	5.67889	5.2063	6.2347	5.77412	6.87064	4.30477	5.8744	7.79488	6.46586	7.1939	4.82202	5.70988	5.18413	4.6027	6.04645	9.39471	5.20426	6.16543	5.5389	5.8071	6.30998	6.82591	5.7884	5.3389	6.06298	6.31053	6.32818	5.81421	6.36087
NONO	3.55e-19	12.1792	12.3202	11.8245	12.8454	11.6647	12.3515	12.705	12.8865	12.5051	11.8106	12.406	12.4691	11.9834	12.3252	11.9345	11.488	11.8053	12.1264	12.0777	12.7796	12.5683	12.1508	12.1324	12.3321	12.6035	12.3713	11.8245	12.8865	12.444	12.5534	13.2342	12.8412	12.6987	12.7147	11.3385	12.5683	13.0133	12.1247	12.8619	12.1686	12.2601	12.1731	12.3252	11.5519	12.5751	11.997	12.2518	12.3017
CD63	3.55e-19	14.1766	13.8455	14.1187	13.8995	13.821	13.9171	13.9934	13.6169	14.3624	14.2117	13.7288	13.522	13.8291	13.9729	13.2579	12.7082	14.2566	14.5488	14.0816	13.8568	13.8995	13.674	14.1187	14.0267	13.4698	14.3249	13.8995	13.3872	14.1619	13.9171	13.4924	13.9403	14.7824	14.1062	12.7517	14.3249	13.7449	13.9302	14.4055	14.132	14.0267	13.6545	14.1187	14.241	13.9171	14.3072	14.1187	14.2732
ZCCHC12	3.57e-19	8.59699	7.15515	7.95586	7.59797	7.67663	8.79908	7.55279	8.31806	7.50198	8.35759	8.44523	9.66863	7.95717	7.67995	9.44749	10.6269	9.44749	7.89317	8.25118	9.26484	9.08573	7.66349	7.668	8.70247	7.93487	8.04887	9.31965	7.84284	8.11782	7.7664	8.03805	8.70247	8.79122	8.21976	10.5268	7.3676	8.11914	7.6004	7.43647	7.79289	6.99558	7.85281	7.34458	7.82885	6.82054	7.61947	8.01477	7.32368
SLIT3	3.84e-19	6.97772	5.91901	6.57424	6.59869	7.13376	7.12981	6.95991	6.73507	6.37514	6.56555	6.92871	7.37877	6.22541	6.78036	7.19604	7.84245	7.16765	7.48342	7.39145	6.63702	6.64316	6.34394	7.24428	6.68034	6.82092	6.61783	7.05625	6.56588	6.8294	5.56939	6.37844	6.79794	6.78362	7.32925	7.46717	6.62348	6.90102	8.10879	6.45218	6.73827	7.2255	7.23627	7.19253	6.37449	6.62622	7.01314	6.92891	6.74997
PNMAL2	3.88e-19	7.52192	4.52776	7.88904	5.2698	5.96428	5.9428	5.77439	5.07363	5.44109	8.8159	5.70452	9.81537	5.08767	5.77157	9.40573	11.0818	5.28795	4.02547	5.977	4.19117	5.49942	7.24539	4.38716	7.17601	5.3211	5.36648	9.61526	7.04673	5.68074	5.12487	5.33077	5.11915	4.98434	7.96473	11.0286	5.21501	4.85504	5.13918	4.74983	5.09092	7.39159	5.41357	5.17301	5.42985	5.9941	7.15302	5.01934	5.16539
RHBDL1	4e-19	3.93608	4.1762	3.3744	4.47357	4.62231	3.49066	2.92791	3.15563	3.92726	5.82138	5.13556	4.52184	3.5671	3.88179	5.88682	7.50277	2.91574	2.98698	6.8961	2.86402	3.06772	2.94626	3.13166	3.21043	4.23584	2.80536	6.7082	4.71089	4.01988	3.803	4.55106	4.83905	3.04416	3.39005	7.23253	3.71302	3.06445	3.697	3.38446	3.82853	2.96116	3.04664	4.01491	4.25927	3.17579	4.64576	3.39383	3.66153
SNCG	4.05e-19	7.09398	5.84648	6.54838	5.51452	5.8071	6.75659	5.53759	6.09488	5.45006	6.74581	6.00043	8.53873	5.06655	6.66408	8.29348	8.59069	6.67154	6.33473	6.57064	6.3042	4.54006	6.41408	5.36613	6.29087	5.96343	5.80002	7.74541	6.85992	6.82067	4.77197	6.05921	5.51854	6.57424	5.4953	9.3357	5.23705	5.4188	6.50891	6.5182	6.32317	6.2754	7.06383	6.73091	6.69802	7.18	6.93912	6.10193	6.35259
STXBP5	4.15e-19	8.86404	7.44114	8.54771	7.87024	8.0287	8.60561	7.81478	7.56965	6.4593	8.7119	7.83284	9.30011	7.49597	8.03498	8.98974	10.4979	8.20614	8.09852	7.18387	6.95673	8.21392	8.23581	7.15359	8.58779	8.09935	6.70361	9.9292	8.18545	8.09798	7.95194	7.25015	7.99514	8.20587	7.80602	10.2114	7.69053	6.96797	8.11613	7.79541	7.10106	8.27401	7.87272	7.22651	7.1946	7.44733	8.03739	7.70114	6.99127
GNG5	4.19e-19	12.4743	13.0329	12.3417	12.5026	12.6359	12.5166	12.6987	12.6429	12.8454	12.4229	11.5064	12.5105	12.6789	12.5656	11.4952	11.2391	12.5627	13.1238	12.9275	12.6137	12.1467	12.2109	12.7365	12.3302	12.0703	12.8865	11.3427	12.6755	12.8619	13.1083	12.1508	12.7756	12.7517	12.7599	11.2091	12.9361	12.7337	11.4415	12.8373	12.945	12.5683	13.0379	12.626	12.7552	12.9316	12.3228	12.945	13.2409
RTBDN	4.35e-19	4.99291	5.6472	5.25835	6.98288	5.0236	4.47765	6.11651	6.86991	6.05649	5.30551	5.97859	6.46522	5.36682	4.80934	6.16336	7.39346	6.90539	6.07696	4.23584	5.14296	5.822	4.80366	5.37919	5.37183	5.39056	7.30481	5.33728	5.37507	6.39664	5.50607	4.89589	6.66173	5.46178	4.84345	7.16785	5.24047	5.09351	5.6246	4.0058	5.25222	5.14601	5.37649	5.12487	6.58197	6.4489	5.0938	5.29603	5.33692
RAB40C	4.74e-19	8.30026	8.69185	8.33112	7.90746	8.28443	8.4873	8.08009	8.29909	8.40697	8.66764	8.42409	8.95061	8.71139	7.4898	8.55376	9.27261	7.8202	8.23399	8.24397	8.36099	8.41384	8.38598	8.72003	8.37524	8.43258	8.39625	8.42733	8.72382	8.26861	9.05114	8.10268	8.55957	8.40118	8.52104	9.41352	8.23208	7.33299	7.92663	7.90471	8.34289	8.2187	8.27486	8.63152	8.73036	8.26264	8.4708	8.63736	7.93711
GNAI3	4.75e-19	10.9599	10.9624	10.4058	11.1911	10.3765	11.0799	11.0852	11.2753	10.7858	10.6339	9.71647	10.6742	11.1007	10.4848	9.97046	9.41569	10.9959	11.4593	10.8809	10.4984	11.3006	10.3848	11.076	10.5726	11.1775	11.2228	10.4591	11.365	10.8531	10.5735	11.057	10.8261	10.7296	11.1388	9.23352	11.0163	10.6147	10.2978	11.2815	11.1218	10.8273	11.2418	10.7848	10.8438	10.9605	10.807	11.2542	11.1919
WSCD2	5.17e-19	6.97004	6.08221	6.83188	4.70879	6.45044	6.17256	6.26806	5.02677	5.30015	6.73156	6.78731	7.24472	5.46403	5.57813	7.69688	8.80019	4.93432	5.83021	5.70516	5.66648	5.19288	6.0086	4.91391	6.91055	5.16753	5.66926	7.63015	5.62531	6.57225	5.92214	5.36027	5.40212	6.11819	7.19185	8.64317	5.24741	6.07835	5.21946	5.76623	5.39887	6.77725	5.30488	5.07363	5.48879	6.15581	6.09056	5.18386	5.7149
LRRC7	5.27e-19	8.00459	4.07815	7.59539	5.21873	7.27135	7.23017	4.57323	5.11248	5.03738	7.59904	5.12881	8.20768	4.27431	7.03269	8.04594	9.74766	6.01665	4.32776	5.77236	4.66366	5.48831	6.1769	4.72506	7.65674	5.56159	4.21193	8.70422	6.55879	6.95511	4.74391	4.56937	3.05262	5.6034	6.55741	9.20529	4.54842	5.01309	4.02308	3.68342	5.0388	6.57704	5.38771	4.99221	6.06838	5.21042	6.99075	5.16568	4.92592
MADD	5.67e-19	9.59029	9.42326	9.59405	9.31751	9.78295	9.47975	9.58061	9.51713	9.46012	9.92654	10.1553	10.4896	9.23075	9.7209	10.1692	10.5151	9.16838	8.83226	9.11569	9.97112	9.43819	9.72792	9.34376	9.45903	8.77636	9.05459	10.2078	9.17666	9.17266	9.37916	9.272	8.65544	9.00129	9.81931	10.5862	9.0751	9.53807	9.60997	9.60478	8.90175	10.0287	9.27954	8.95912	9.69988	9.42177	9.68258	8.69334	9.81286
ACVR1C	5.83e-19	8.23122	6.68787	8.92406	7.40978	8.53466	8.43856	6.82234	6.99098	6.87489	8.92483	8.48199	8.39756	6.44757	8.27401	8.9958	9.66487	8.09959	7.34798	8.44751	7.12104	7.79968	7.69794	6.83937	8.60799	7.70861	7.38831	9.20156	8.0287	8.09128	6.97784	6.93048	8.11327	7.02626	8.16502	9.21456	6.79259	7.58096	7.17616	7.41211	7.31617	8.05837	7.92444	7.5284	8.15211	7.49328	8.22664	7.26774	8.20414
ZBTB20	5.85e-19	11.8645	11.8245	11.3325	12.0495	12.0267	11.5444	12.0583	11.2349	11.9268	11.9953	12.5166	12.4109	11.713	11.6968	11.8361	10.4166	11.4902	11.2635	11.4362	11.9001	11.6757	11.6089	11.1719	12.0924	12.2799	12.1283	11.3837	11.7803	11.591	12.7365	12.2109	11.7532	11.3608	12.2647	10.6953	11.884	12.2601	11.7429	10.8256	11.6611	11.8291	12.3515	11.6219	11.7952	11.497	11.9641	11.0142	11.0445
PSMB8	6.14e-19	9.8711	11.0451	9.79738	10.4863	10.5983	9.81251	10.5268	9.91132	9.22693	9.71088	10.1794	10.1204	10.9618	9.73295	8.53819	4.04938	10.4587	11.1686	10.6855	11.6124	9.52308	9.10689	10.5383	10.0225	9.00369	10.6576	8.75271	9.94666	10.5419	8.37737	9.97954	10.2554	10.1389	9.5796	4.88654	9.9549	9.78887	10.3925	10.2378	10.6248	9.8608	10.4144	10.5934	10.1644	10.0723	10.4948	9.65582	10.3513
GAD2	6.27e-19	7.72208	6.14711	7.4345	7.0048	6.88168	7.55476	6.91324	6.20028	6.1218	7.62208	6.8496	8.3163	6.56696	6.90128	8.30177	8.93431	7.0424	6.03967	7.69337	6.50861	6.48381	7.27217	6.57869	7.27329	7.17842	6.80094	8.12057	7.33437	7.11609	6.53491	7.21754	6.38473	6.46522	7.43838	8.99365	6.44993	7.12951	6.73675	6.55067	6.73363	7.40007	6.57603	6.33738	7.13006	5.78305	7.45917	6.45257	6.15652
RECQL	6.27e-19	10.0149	10.1621	9.8106	10.0481	9.55909	9.69068	10.1352	10.0702	9.93329	9.66863	9.26366	8.36569	10.0014	9.73557	9.01822	8.53046	9.92103	10.561	9.76045	9.37404	9.58091	9.46207	10.0609	9.85727	9.45839	10.2794	9.61281	9.43238	9.83035	9.75018	9.51432	10.112	9.95972	9.90925	8.65324	10.4071	10.3022	10.5048	10.1193	9.8899	10.0312	9.76236	9.86476	10.0573	9.87144	9.95836	10.5431	9.40497
FEZF2	6.3e-19	6.6781	4.7794	6.39642	5.08292	6.17877	6.22964	4.84828	6.01033	5.71596	6.91543	5.69125	6.87219	4.51024	5.1795	7.5434	8.37791	4.05169	3.62779	6.53258	5.09668	4.5698	6.05435	6.12956	4.72907	5.32447	5.23928	7.63053	5.18544	6.0239	5.84421	5.5738	4.40442	3.86553	5.24321	8.91987	4.37019	4.82329	3.86932	5.8161	5.35771	6.76324	4.14594	4.71308	5.77465	6.09093	6.05937	4.48536	5.58775
HSPA12A	6.7e-19	8.92351	7.18222	9.21593	7.03685	8.50789	7.93867	7.08191	7.76418	6.27659	8.8963	8.51947	9.42966	6.95948	8.09935	9.87178	10.7848	7.94443	7.02821	8.2166	6.6972	9.58938	8.34078	6.74481	9.54838	7.64959	6.96826	9.93228	8.22306	8.5879	7.30518	7.86109	7.60349	10.5754	8.3396	10.7322	7.14379	6.66142	7.78475	8.24978	6.89208	8.24105	7.0555	7.33776	8.0136	7.37981	8.46674	7.00395	7.27653
AJAP1	6.75e-19	6.68549	6.02319	7.31617	5.72367	7.38316	6.95131	5.77035	5.70059	6.54963	6.79755	6.79342	6.93238	6.27383	6.65033	7.49081	8.42066	6.53378	6.13013	6.34585	6.31989	5.73197	5.9125	5.84944	6.91501	6.77725	6.56464	7.26637	6.84408	6.38063	6.08199	6.35839	5.64939	5.95684	7.09304	7.95086	5.68865	5.16247	5.93852	6.69689	5.73349	6.83726	5.79789	6.14988	6.44855	4.84439	6.68252	6.60375	5.81927
LINGO2	6.98e-19	7.45931	6.58197	7.57419	6.43375	7.3429	6.71237	6.80153	5.88067	7.44954	7.59173	7.86503	9.08311	6.19732	6.89421	8.01667	9.56398	7.66586	7.65871	6.9444	7.53916	6.29867	7.12785	6.62954	7.26989	7.29317	7.36771	8.25551	6.82692	7.29519	7.39077	6.92753	7.18945	6.68048	7.3399	9.65344	6.90715	6.55652	7.08037	6.91399	7.37911	7.33776	6.64443	6.68549	8.26473	6.61717	7.3825	6.82675	6.66188
RAB3B	7.2e-19	6.8244	6.073	7.48366	6.38355	6.53845	6.13743	6.96023	6.52149	6.25834	6.68646	4.9742	8.37095	6.11819	7.07305	7.07172	8.41995	5.88664	6.98079	5.83607	6.31074	5.80396	5.56457	6.39857	6.56464	6.6838	5.7565	6.83247	6.67366	6.39973	6.31148	6.87109	6.32501	7.56651	6.36251	7.9954	6.34394	7.09772	6.015	7.27933	6.00413	6.13399	5.52815	5.68812	6.05194	6.17877	6.55408	5.38474	6.03265
HTR2A	7.35e-19	8.8025	6.16393	8.88181	6.55919	7.57735	8.62783	6.48022	6.79306	6.52921	9.21504	8.03645	10.0625	6.67044	9.10948	9.7065	10.8934	7.85334	6.29883	7.98881	6.74012	6.55652	7.27025	6.85615	8.80724	7.09217	6.77677	9.88127	7.89034	8.18245	7.2371	7.03218	6.63859	6.74664	9.18404	10.409	6.61529	6.98173	7.09799	6.5142	7.0141	8.03549	6.95766	7.18413	7.96992	7.36338	8.44382	7.22665	6.00043
AAK1	7.92e-19	9.14908	8.4419	9.32223	8.19214	9.13877	9.08764	8.23234	8.43598	8.38436	9.24473	8.71256	9.61757	8.53993	8.84587	9.34013	10.2279	8.81736	8.85733	8.88438	8.76926	9.04629	8.9561	8.69475	9.22566	9.15065	8.54608	9.7981	8.58249	9.0582	9.27547	8.31368	8.7032	8.91445	9.16861	10.0374	9.08547	8.76456	9.06625	8.97673	8.72747	9.07777	8.91965	8.39648	9.40876	8.94312	9.0684	8.92813	8.82938
BTRC	8e-19	8.63604	7.38395	8.3454	7.80187	8.23534	7.85417	7.88561	7.8818	7.60531	7.98985	8.65139	8.51047	7.96116	8.0723	9.02155	9.37893	7.83392	7.56677	7.79762	7.3464	7.76475	8.6214	7.74771	8.46174	8.29881	7.50846	8.82044	7.99617	8.00459	7.8089	8.39239	7.14963	8.87281	8.10379	9.06462	8.0194	7.80329	8.89504	8.39239	7.80754	7.76942	8.77802	7.50321	7.91084	8.43141	8.03968	7.43421	7.86372
BAZ1A	8.24e-19	9.55314	10.0499	9.09551	9.65316	9.61772	9.73594	9.98517	9.04238	9.49442	9.55545	9.6928	9.9292	9.89813	8.87953	8.57683	7.81763	9.06005	9.47836	9.0788	10.3695	9.67979	9.23854	9.84016	9.94068	9.90749	9.83934	8.65126	10.2167	9.82616	9.79967	9.63639	9.59636	9.70381	9.02407	7.93723	9.11369	10.4258	8.39423	10.526	9.41125	10.1425	10.0902	9.50645	9.43176	10.4471	8.91881	9.78887	9.06625
TRAF3IP2	8.5e-19	8.67887	9.54732	8.04161	8.47332	8.08124	9.00637	8.45979	7.90143	8.05034	8.71743	8.76716	8.56059	9.02407	8.94515	8.6986	6.28194	8.71039	9.69008	9.19962	8.50038	7.21188	9.67015	8.85431	8.00728	8.7389	9.13685	8.28053	8.23399	8.06524	7.61024	8.57958	7.03942	9.31305	8.08653	7.82766	9.25799	8.55422	8.32617	8.36708	8.80989	7.92478	8.00549	9.01316	8.07331	8.23776	8.47515	8.56472	8.31013
EHD3	8.51e-19	9.12913	8.43061	9.1034	8.06653	8.41449	8.95881	7.93601	8.66677	8.29469	9.42326	9.13034	9.09173	8.27264	8.86605	9.75348	10.6041	8.86746	8.40942	9.08072	8.19266	8.32986	9.0468	8.14586	9.39235	9.01411	8.30026	10.105	8.93229	8.71256	7.84596	8.32313	8.28626	9.55789	9.23374	10.5684	8.43388	7.74979	8.75726	8.16869	8.56459	8.84975	8.66781	8.42027	9.2349	8.23776	9.25107	8.35385	8.64558
NCAPG	8.6e-19	7.91971	8.0707	6.69091	9.38097	7.02977	7.83602	9.65075	9.68197	8.40148	7.60205	6.8011	9.19023	8.42066	6.18359	6.4683	5.9551	8.0272	8.82455	7.65661	8.83214	8.04019	8.5257	7.73851	8.63578	8.19462	8.87877	7.29221	9.12692	8.7501	9.05569	8.78765	9.52567	8.40405	8.6813	6.21463	7.90314	9.39006	6.87916	8.8856	8.68295	8.10427	7.62838	9.21209	7.06423	9.12397	7.3429	8.16158	7.48173
CRNDE	8.66e-19	9.10282	9.77374	6.88702	5.91525	9.21209	10.424	5.35202	10.2645	9.92401	9.0173	8.30285	10.2035	10.9824	5.28742	7.67691	5.67679	10.6576	11.0107	9.25311	10.1705	8.50231	10.5415	10.4556	8.71453	10.9524	10.1872	8.26702	10.4112	9.35808	11.1601	9.99962	11.0768	10.2256	10.9346	6.57975	6.68817	10.3773	10.7993	9.73279	10.5136	8.89529	9.84224	10.4187	10.7693	10.4834	10.6976	10.1078	10.0617
OAT	9.53e-19	11.9934	11.3162	12.1983	10.3687	12.113	11.5897	10.5233	11.1178	10.896	11.7532	12.1427	12.2965	11.8376	11.8093	12.5289	12.6789	11.5024	11.1201	11.5258	10.6982	11.4794	11.5817	10.9947	11.7212	11.7361	11.1357	12.3252	11.4902	11.7093	11.8167	11.3397	11.1536	11.8539	11.6584	12.7303	11.7078	11.3645	11.936	10.9328	11.1902	11.6337	11.6286	12.103	11.3537	11.6195	11.9236	11.565	11.2008
SYNGR1	9.82e-19	8.82481	8.01491	9.05459	8.53498	8.75933	8.77153	8.49901	7.54691	8.67296	8.70166	8.99764	9.92553	7.92925	8.52687	9.87883	10.3316	8.50517	7.4633	8.74278	8.2836	8.95596	8.52473	8.56751	9.23877	7.77803	7.92109	9.77413	8.447	8.8362	7.91319	8.73133	7.56996	8.04046	8.57725	10.4227	8.51641	7.7993	8.7985	8.71465	8.47434	9.03113	8.59553	7.66775	8.67192	8.77153	8.92155	8.07021	7.91435
GABARAPL1	9.93e-19	9.79845	10.1193	10.181	9.17299	9.90432	9.95051	8.85625	9.50292	9.20586	10.0854	9.94904	10.5552	8.73093	9.76842	10.6072	11.3801	9.96504	9.37517	10.1142	8.7009	9.29059	9.32881	9.59623	9.82712	9.35009	8.84642	11.1727	9.64566	9.51242	8.59225	9.17617	9.04059	9.16551	9.58489	11.5555	9.71916	8.68167	11.111	8.83606	8.37427	9.64441	9.31277	8.63591	9.05396	9.49681	10.3765	9.61538	9.55225
ID3	1.05e-18	11.6597	12.8412	11.4554	12.7682	11.6813	12.5051	13.0938	13.1622	13.2009	12.025	12.2518	11.2877	12.1853	13.1622	10.2469	8.74513	10.4976	12.2447	11.5684	12.6679	13.0329	13.3114	9.87761	12.626	11.7816	13.6985	11.4772	12.6953	12.4965	9.14048	13.2117	13.1448	10.9155	10.5715	9.75207	11.2745	11.6611	12.0317	13.9729	13.6468	13.0839	13.6397	13.3182	12.0298	13.3735	12.1467	10.9379	14.2117
PALLD	1.08e-18	11.6683	11.4605	11.0356	11.009	10.9303	11.1342	11.0066	10.9925	10.206	10.803	10.1845	10.972	11.2418	11.0046	10.0381	9.36583	11.9934	12.0165	11.3094	10.1349	10.9412	10.7864	11.936	11.1983	10.9998	11.6772	10.9667	11.2048	11.1492	9.09235	10.5151	10.7179	10.6262	10.8493	9.21209	11.1454	10.8163	10.3394	10.7312	11.4458	11.7778	11.5684	10.7693	11.1686	10.642	10.9119	11.6813	12.0267
RPS15A	1.11e-18	11.7872	12.705	11.9427	12.9	11.9218	12.685	12.5449	12.3659	12.7082	12.2669	12.1933	12.4664	12.2027	12.094	12.2313	11.4041	12.5195	12.3444	11.74	12.5871	12.3659	11.9531	12.6953	11.8716	12.4312	12.217	11.8053	12.9723	12.2941	12.6165	13.2058	12.6719	12.4411	12.7517	11.2237	12.4772	12.2494	12.5909	12.5967	12.6165	12.5105	12.4109	12.1835	12.2447	12.5564	12.3492	12.7721	12.5227
SLC6A15	1.24e-18	6.45257	6.18321	7.71236	6.05071	7.65604	6.99219	5.4083	6.96432	5.96936	6.99584	6.00043	7.80507	5.43654	5.91585	7.46173	8.66662	6.95103	6.13937	6.66233	5.84818	6.32534	4.89736	6.03989	6.83528	5.70275	5.82956	7.664	6.34217	7.01564	6.20259	5.23873	5.7804	5.08767	6.28724	8.5476	6.04353	6.03386	5.8131	5.00483	5.99056	6.20849	5.80027	5.59078	5.4093	5.62222	5.84399	5.968	5.41357
BTBD10	1.25e-18	9.85423	9.46869	10.2951	9.52237	9.4394	9.76593	9.65582	9.95941	9.88162	9.80841	9.95458	10.5124	9.7673	9.40009	9.86946	10.8644	10.3901	10.2186	9.55089	9.9126	10.1093	9.85131	9.85438	10.1344	9.33784	9.8711	10.0742	9.52308	10.0974	9.50292	8.89373	8.92406	9.66395	10.2271	10.9015	9.22385	10.2887	9.95589	9.58374	9.77306	9.90474	9.2366	9.85293	10.3228	9.83833	9.84588	10.1625	9.75143
C1orf27	1.28e-18	9.22857	9.53649	9.66301	8.61983	9.47869	9.40095	9.48201	9.18704	9.16395	8.91633	9.91196	9.43325	9.02242	9.21152	9.15644	8.51125	9.23462	9.04115	9.33111	8.54495	8.46102	9.10496	9.36805	8.76746	9.28086	9.6184	9.2803	9.13405	9.17299	9.38579	9.91746	8.55683	9.04776	9.44838	8.41409	8.53705	9.68009	7.64242	8.84321	8.62811	9.41225	8.51327	8.9031	9.0673	8.68088	8.9958	8.7714	8.12521
TTC7B	1.35e-18	10.5527	9.69371	10.067	9.21971	9.69164	10.0232	9.74146	9.08943	9.10521	10.2727	9.82744	10.6675	9.15475	9.50572	10.7624	11.1523	9.40631	9.41484	9.57333	9.88808	9.58625	9.86708	9.57916	10.1366	9.82349	9.7339	11.0204	10.0294	9.86848	9.92482	8.86818	8.46451	9.86063	9.44366	10.9194	9.33374	9.01149	9.03074	9.58216	9.7826	9.8437	9.91229	9.86063	9.15667	9.60967	9.68715	9.39844	9.63535
SYT5	1.36e-18	7.42971	6.05769	7.29763	6.25246	6.52234	7.62369	6.14561	6.35305	5.95424	7.39374	6.55267	8.62838	5.80234	6.53755	7.84463	9.35313	7.27959	6.31031	5.77112	6.60362	6.7039	7.51041	6.50756	7.52529	6.43932	6.40866	8.38343	7.57776	6.2664	5.63541	6.82924	6.31183	5.65128	7.47237	9.3354	6.06457	5.60188	6.04846	5.68473	5.88067	7.07561	5.63514	6.88702	6.51056	6.45857	7.30283	5.89171	7.06945
LMTK2	1.39e-18	7.47573	6.58388	7.61576	7.62358	7.79488	7.92392	7.86204	7.41842	7.58707	7.99963	7.5456	8.2216	7.76863	7.63806	8.21855	8.97344	7.28263	7.40299	6.78502	7.42488	7.7979	8.06275	7.74771	7.86265	7.86683	7.71833	8.27095	7.87827	7.79953	7.76218	7.87949	7.89353	8.10402	8.36418	8.50126	7.92593	7.84344	7.79953	8.1012	8.07907	8.05557	7.15181	7.63436	7.28397	7.81398	8.0299	7.47758	7.94143
ACTR3B	1.48e-18	9.40586	8.67296	9.12142	9.4066	8.65247	9.9366	9.3784	9.37647	9.46898	9.31152	9.25663	9.9156	9.90006	9.06865	9.63194	10.3687	9.0788	8.58208	10.7624	8.83006	9.7877	9.19931	9.9146	9.858	9.25259	9.08021	9.97578	9.29182	9.13983	9.79253	10.161	9.34057	8.83841	9.86203	10.3536	9.18009	10.5007	8.27775	9.46961	9.69974	9.39038	9.21971	9.5796	9.00343	8.99001	8.87513	9.2555	8.91803
RP11-389G6.3	1.48e-18	7.41328	3.31627	6.73607	6.00391	6.78593	6.73428	6.47924	5.14721	7.0579	7.25704	6.9328	7.94854	6.36886	7.21419	7.92295	8.9829	6.89903	6.39234	5.685	5.09878	4.59632	6.66125	5.89664	6.74012	5.80905	6.48474	8.54782	6.8956	6.43455	6.36725	6.81081	6.8901	5.96212	6.25551	8.50723	6.39664	3.38631	5.94259	6.88887	6.35988	6.61448	7.4937	7.31823	7.12341	5.83607	7.58223	6.52115	5.8846
GRIN3A	1.51e-18	7.40799	6.19066	6.9676	6.18301	6.60815	6.4566	4.98281	6.08343	4.44173	6.45807	9.27186	7.44515	6.52527	7.03299	8.17292	8.27815	5.44076	5.57166	6.32534	6.52509	6.4022	6.4789	6.03658	6.1434	6.56049	6.48709	7.58042	6.99369	6.81206	6.11651	6.56874	6.48829	6.25386	6.48552	8.19841	5.58898	6.42611	6.32758	6.58214	5.53631	6.60948	6.72741	5.89573	6.40152	7.17637	6.3768	5.56939	4.26939
PTPRR	1.53e-18	7.67995	6.897	8.18079	5.54741	6.1552	8.09631	6.52762	4.56744	7.00055	7.84344	6.98628	8.63152	6.32991	6.66233	8.30774	9.53649	7.18413	6.57537	7.51162	8.19936	7.28677	7.14655	7.16823	7.63135	6.50788	6.30435	8.99068	6.34167	7.08176	6.45338	6.15315	5.79558	6.19677	7.64923	9.72442	6.41324	6.45595	8.2104	5.9253	6.69527	6.84773	6.42372	6.46251	7.35472	5.74105	7.57267	6.68269	6.31031
PPEF1	1.53e-18	6.49104	6.98658	7.08297	5.63835	5.92743	6.98628	6.20181	6.64553	6.76234	6.88407	6.38164	7.54785	7.03614	6.57361	7.73864	7.42665	6.4683	7.18596	6.62362	7.19521	7.14727	5.84966	4.65712	7.54576	7.19733	6.90128	7.10475	7.20243	6.77318	7.5951	5.83837	7.23267	5.49322	7.29533	7.96523	6.6728	7.3834	6.93736	7.15695	6.75061	6.43063	5.59783	7.52423	6.27214	6.72293	5.71338	7.28293	6.48958
DNAJA4	1.56e-18	9.3365	8.52396	9.37088	8.13286	8.89684	8.93575	8.11212	8.54666	8.92374	8.94849	8.0671	9.50326	8.73036	8.74088	9.67948	10.3421	9.11569	8.36442	8.45579	8.8472	8.86319	8.88078	8.60524	9.04495	8.14182	8.80127	9.98727	8.26435	8.65558	8.8412	7.7587	7.44404	8.67669	9.27003	10.2698	8.21367	7.95638	8.99402	8.94835	8.63336	8.41926	7.80861	8.39294	8.73595	8.00389	8.86347	8.37226	10.2122
ATRAID	1.58e-18	11.8121	12.0234	11.7212	11.6844	11.8199	12.3321	11.7179	12.0924	11.9883	11.8617	11.5155	11.4373	12.2049	12.1228	11.3776	10.5632	11.9658	12.0828	12.5195	12.2941	12.2313	11.8106	12.2735	11.947	11.9611	12.0182	11.4685	12.2069	12.2427	11.2365	11.5767	12.0742	12.5656	12.0148	10.6445	12.1955	11.6932	12.2151	11.9799	12.1853	11.8093	11.7532	12.6107	12.4386	12.1531	12.1568	12.3605	12.3228
GOLIM4	1.61e-18	10.2504	10.5117	9.87401	11.3532	10.6899	10.0856	11.3902	10.8385	10.5424	10.8	10.6231	10.1822	10.7018	10.7176	10.0431	9.361	10.071	10.183	11.3084	10.9905	10.1039	10.7449	9.72792	10.2641	9.59255	10.9739	9.56233	10.452	10.1159	11.0299	9.30119	10.6936	9.81475	10.7827	9.58248	10.2667	10.4834	10.2586	9.99035	10.085	10.5171	9.95458	10.9022	10.8261	10.3497	10.4294	10.7173	10.9124
BRCA2	1.87e-18	7.25083	7.11876	6.17373	7.95208	5.9451	7.43205	8.13484	8.30463	6.92682	6.09707	6.38642	7.01913	7.33124	6.75897	6.16763	5.44598	6.63551	7.20349	6.68661	7.02863	7.33138	7.22937	6.99431	6.72936	7.26177	7.03871	6.60131	7.08339	7.27683	7.25203	8.07177	7.77417	8.42623	7.87231	6.34823	7.25289	7.57855	6.91876	7.58066	7.49424	6.84467	6.76898	6.98658	6.76175	6.85045	6.41449	7.25228	5.78155
PDIA4	1.91e-18	10.5136	10.9639	9.93968	10.6339	9.92401	10.6675	10.5857	10.8742	10.9605	10.0727	9.96729	10.4058	11.5731	10.1786	9.9068	8.99213	10.4069	10.676	10.7322	11.0999	10.7352	10.355	11.3158	10.4323	10.1892	10.9115	9.90174	10.4591	10.4934	10.3244	10.4396	10.6118	9.84785	10.9464	9.51242	10.1598	11.1555	9.99894	10.3166	10.836	10.0146	10.0663	11.2016	10.5406	10.5998	10.1418	10.9119	10.0011
NPTXR	1.95e-18	8.33774	7.64668	7.4769	8.17446	8.31549	8.27264	7.87155	7.48636	7.89289	8.34793	8.5386	9.69131	7.98687	7.4633	9.79341	10.3755	8.09437	6.36984	8.57479	8.14704	8.84273	8.64156	8.90954	9.59165	8.27892	7.79565	9.4025	8.16311	7.99457	8.45774	7.72393	6.79245	8.05434	8.1452	10.6161	8.79469	7.65351	6.30034	6.55427	6.54105	8.0729	6.90525	8.27331	7.49395	8.28277	8.17292	7.47032	6.8362
FCGBP	1.95e-18	11.8291	12.727	10.8011	10.4687	11.0723	11.6696	10.9034	10.7088	11.1619	10.518	10.5206	9.77306	13.2924	10.886	9.009	6.2406	12.1378	12.9497	11.9548	11.1154	12.2824	9.74228	12.9197	10.6568	12.3302	12.4611	10.2615	11.565	11.8525	9.24693	10.8929	10.52	9.89563	11.6379	7.37758	13.1083	10.475	8.53622	11.2852	13.7145	11.9109	9.92039	10.2086	12.9051	10.2271	11.5731	11.487	11.0546
MOAP1	2.06e-18	11.8584	10.9918	11.7902	10.6745	11.2075	11.5497	11.1628	10.5383	11.062	12.0198	11.738	12.6922	10.3028	11.2902	12.3736	13.1346	10.8673	10.2703	11.5088	10.9974	11.3022	11.8152	11.2317	12.0095	11.2902	10.6942	12.8619	11.8152	10.8879	9.92316	10.772	10.4669	11.2391	11.411	12.9316	10.8432	10.3906	10.187	10.9478	10.657	11.7266	11.2057	10.9599	10.7747	10.8373	11.1139	11.1485	10.3563
HERC1	2.08e-18	9.01989	8.1046	9.08929	8.19923	9.11329	8.15836	8.47691	8.1379	8.16954	9.24512	9.22797	9.18991	8.4725	8.76511	9.84135	10.1806	8.48591	8.39524	7.76024	7.9262	8.18245	9.00396	8.18672	9.28702	8.59567	8.56192	9.64814	8.65152	8.93282	8.14787	8.82223	8.36555	8.80431	8.84243	10.1058	8.6936	8.1549	9.33406	8.85758	8.70305	8.95048	8.94775	8.35027	8.01652	8.86219	9.10397	8.15594	8.69296
MTHFD2	2.1e-18	9.24512	11.0272	9.12341	10.0666	9.63702	10.3232	10.0577	9.81854	9.54004	9.34642	10.3777	9.37308	9.70845	9.64622	10.6355	6.82631	9.63487	10.2007	9.99205	10.0739	10.6302	10.8903	9.98663	10.181	10.1566	10.9792	9.35831	10.5993	10.0032	9.75077	8.7257	10.145	9.96435	8.58638	7.64096	9.89254	9.54235	9.45207	10.2275	9.97275	9.87294	11.8631	9.39339	9.94666	10.2591	10.3695	10.0094	9.92585
MAPK7	2.15e-18	8.92116	9.64441	7.97812	9.02748	8.22294	8.79282	9.10662	8.96237	9.10801	8.71402	9.12439	8.21989	9.27973	8.71163	8.36076	7.15684	9.15121	9.26931	9.47621	9.88563	8.7305	8.6986	9.69426	8.61315	8.85543	9.57848	7.61298	9.03593	9.04776	8.94182	9.34875	8.88675	9.40329	8.70493	7.45529	8.99844	8.82938	9.68731	8.84258	9.63457	9.35346	8.9979	8.48401	8.94461	9.30841	8.80724	8.91339	9.21671
RCN1	2.19e-18	11.5591	11.8066	10.8041	12.8211	10.6488	12.3686	12.9051	12.3884	12.0372	11.319	11.7714	11.1088	12.1303	11.5024	11.3049	10.1495	11.7031	12.3806	12.2647	12.0512	12.1933	12.1792	12.0408	11.4749	11.0581	12.0336	12.1446	11.421	11.1246	11.6757	11.6744	11.449	11.7789	12.0742	9.94293	12.094	12.4203	12.817	11.8216	12.0924	11.9173	12.2918	12.117	12.9631	11.8652	12.0703	12.0477	11.899
MYRIP	2.21e-18	8.80572	7.71637	8.13373	7.49058	8.09564	7.29576	7.18596	8.03485	7.1195	7.87622	7.97687	8.85866	7.36011	7.79817	8.52854	9.72469	7.90702	7.97269	7.21067	7.78557	6.78854	8.36837	7.19683	8.03301	7.58815	7.30358	8.74396	8.47945	7.53138	8.32731	6.91092	7.27575	7.39888	8.20255	9.57378	7.57209	7.91791	6.79738	7.28142	6.52046	7.74219	7.19577	7.95825	7.95415	6.95252	7.89899	7.54199	8.43584
PITHD1	2.25e-18	9.68505	8.99275	9.29401	9.08155	9.42826	9.02079	9.03955	9.55965	8.79396	9.21406	8.22777	10.2252	8.98469	9.42447	10.0022	10.5374	9.55225	9.53558	9.79218	8.51696	9.21294	9.53099	8.95652	9.27261	9.44107	9.12452	10.0349	9.56502	9.45095	9.30841	9.38108	9.13971	9.44047	9.84513	10.6156	9.61983	8.2762	8.57929	9.44512	9.41282	9.45778	9.5793	9.06625	9.12678	9.82616	9.63639	8.02841	9.81156
DTX3L	2.3e-18	11.0868	11.4783	10.7887	10.78	11.2048	10.9245	10.9264	10.6445	10.4785	10.9732	10.3408	10.6191	11.2745	10.4722	10.2069	9.00832	10.8809	11.5696	10.8234	11.7803	10.4337	10.3927	11.0744	11.0259	10.2371	11.3477	10.2707	10.5899	10.7168	11.0481	10.9309	11.5302	11.3827	10.8273	8.04594	10.8081	11.468	11.4191	10.4934	10.8138	10.896	11.4533	11.1845	10.9379	10.9034	11.6968	10.6122	10.6768
LAMC1	2.44e-18	10.6077	11.2131	10.9557	11.9062	10.4448	11.2032	11.9564	9.9451	11.3158	11.6423	9.62263	9.62648	11.4415	10.6283	9.27927	8.93834	11.0558	11.6548	10.0552	10.8866	10.886	10.2149	11.486	10.4385	10.8776	11.2212	10.6736	11.0952	10.8163	11.0259	10.6866	10.9911	10.8006	10.7119	8.83565	10.635	10.8403	11.413	11.6112	11.3296	10.5641	10.1048	11.2951	10.9849	9.3909	10.224	11.5862	10.7419
PAK6	2.5e-18	9.71572	7.32697	8.76223	7.49659	7.50471	8.63667	7.36627	7.56205	7.65221	8.15287	7.92963	9.47495	7.64022	7.51563	9.3851	10.6021	8.60575	7.24271	8.32283	8.32799	7.50347	7.95677	7.59784	8.14813	7.18487	7.27344	9.64266	7.79168	7.41569	7.22174	6.575	8.01534	7.90392	7.70861	10.0502	7.49395	8.32342	7.5832	7.32953	8.65381	7.96064	7.66159	7.16928	8.57765	6.80723	8.25315	7.17868	9.49871
RAB3C	2.59e-18	7.68091	6.24681	6.86991	5.37353	6.5664	7.74928	5.50135	7.20918	5.68551	7.64266	8.02217	8.76197	6.37348	6.52325	8.70007	9.78151	7.13775	6.0368	6.55892	6.25078	7.64149	7.53329	5.77864	7.9204	7.0552	5.71414	8.9753	6.99504	7.3891	5.99516	7.82789	6.19712	6.61211	6.60362	9.60603	5.75327	6.21964	6.12391	6.03843	6.36804	6.83203	6.22074	6.02233	6.46357	6.46586	6.8961	6.70716	5.97501
ADAM11	2.63e-18	7.06076	6.82003	7.15209	5.92242	6.9164	7.29399	7.1286	6.28907	6.55682	6.77345	6.69061	8.16981	6.31742	7.06719	7.85795	8.80162	6.28873	5.02496	6.86597	6.40949	6.75043	6.5951	5.43315	6.51843	6.62575	6.60948	7.42219	7.09369	7.02186	5.99604	5.98613	6.77708	6.39381	6.08625	8.7162	6.69499	5.27857	6.24906	6.70861	6.21664	7.00404	5.89084	6.11774	6.92138	6.61265	7.37416	6.13683	6.55741
GLS	2.64e-18	9.36464	8.88438	9.30991	8.96863	8.81017	9.25441	8.9824	8.58221	8.87333	9.46616	8.76112	9.76842	8.89112	8.68397	9.42911	10.8763	9.1935	8.95994	9.05002	7.8864	8.9554	9.16838	8.88675	9.60938	8.65452	9.18789	10.2785	9.03193	9.13942	8.83786	8.36775	7.70452	9.08709	8.94474	10.6242	8.60235	8.63495	9.09662	9.33512	9.01275	9.02706	8.98659	8.77528	8.78641	8.4674	9.24047	8.96919	9.05058
YPEL2	2.65e-18	9.33914	9.08957	9.95426	7.32246	10.2457	8.38919	7.67549	9.04749	7.77442	9.78151	8.8025	9.57109	8.24371	9.20103	10.3742	10.1969	8.69527	8.81265	8.14295	8.28868	9.34376	8.02759	8.04947	9.13942	9.43703	8.44995	9.62924	8.52435	9.05528	7.80703	8.44995	9.00996	8.63552	8.69686	10.0652	8.49512	7.21669	10.2183	8.3069	8.39862	9.08573	9.26444	8.35663	9.09222	8.67337	8.86944	8.7059	8.44036
TSEN34	2.67e-18	10.6877	11.1036	10.4439	11.7321	10.6822	11.4815	11.6195	11.1226	11.5247	10.3858	10.2995	10.1895	10.8199	10.6907	10.2764	9.71207	11.0259	10.9974	10.7125	11.6829	10.7421	11.0584	11.0717	10.836	10.9296	11.1242	10.4974	11.1991	11.0052	10.8909	10.9905	11.4081	9.94225	11.256	9.8495	11.1466	11.171	10.9346	10.7222	11.2932	11.2317	10.9504	11.5696	11.3992	11.033	10.953	11.3015	11.2083
DESI2	2.71e-18	8.94942	9.52556	9.06386	10.1919	8.88129	9.59465	9.68164	9.69148	9.59559	8.85373	9.00343	9.35313	9.39587	9.17927	8.42302	8.24686	9.23374	9.29124	8.74119	9.60703	9.38191	9.59732	9.59589	9.04736	9.56653	9.96538	8.92062	9.8161	9.58657	9.45095	9.84785	9.18344	8.69581	9.14961	8.00152	9.18762	10.2913	8.38436	9.38523	9.35573	9.1742	9.22312	9.541	9.54688	8.66823	9.48671	9.80686	8.9284
PYGL	2.83e-18	9.6858	10.9079	9.47531	9.74907	10.2751	9.94949	9.68318	9.01641	10.7465	10.3598	8.22903	9.59686	10.6262	10.1676	7.92495	8.15594	10.8828	10.3468	10.8889	10.1949	10.2135	9.78939	10.9484	9.64502	9.60617	10.9258	9.32592	10.1444	10.5911	9.79036	9.70251	9.61638	9.37491	9.43986	8.49341	10.6046	11.2745	9.50526	10.4638	11.3435	10.6012	9.43266	10.3054	9.97177	9.2107	10.3394	10.6156	10.6686
NPY	3.04e-18	9.5331	8.36406	9.73249	9.89741	9.2584	8.68077	10.729	8.66372	7.59318	9.64648	7.19175	9.98452	7.72331	10.4516	9.89974	10.9659	8.5615	7.23667	9.60531	8.49411	7.86669	8.35887	7.81204	9.1229	8.1798	7.32684	9.36554	8.79311	8.68903	7.88667	7.45623	6.74279	8.06197	8.58489	11.1507	7.71503	9.87963	4.67679	8.17027	7.50872	8.91749	7.77803	7.75594	8.50413	8.43198	9.32333	8.25129	6.74843
GREM2	3.16e-18	6.28355	5.51693	6.28873	6.05309	5.9356	5.84627	5.90518	5.56457	5.86375	5.37386	6.61042	6.92425	5.61702	4.37286	6.65749	7.90112	4.97055	4.94741	6.51211	5.95851	5.79816	6.08162	5.32971	6.05263	5.48754	5.82438	6.76251	6.62811	5.8026	5.2053	5.93266	4.34835	5.43202	6.31959	6.98205	5.73922	4.96901	5.17796	5.536	6.05904	6.37401	5.72642	6.25106	6.26923	5.72535	6.13855	5.61166	5.59054
CYP46A1	3.19e-18	10.3858	8.64061	9.74985	7.98421	10.0264	10.3106	8.24635	9.00559	8.86818	10.0822	9.96758	11.3158	8.1841	10.1366	10.9836	11.8854	9.45326	8.25622	10.2735	9.32765	9.8831	10.2591	8.05722	10.0345	10.2124	9.14725	11.0272	9.5789	9.0279	9.93069	7.94258	8.60063	7.98632	9.68345	11.5755	9.16526	8.52284	7.93353	6.56324	8.61129	9.88631	9.61815	9.19434	9.04762	8.76677	9.1541	9.32697	8.60261
PCNA	3.21e-18	11.6799	11.0627	10.9086	12.2358	10.9872	11.4828	12.3778	11.9729	11.147	11.297	10.6133	11.6945	11.2645	10.9328	10.4984	9.57056	10.8742	11.8689	11.0782	12.2918	10.8735	11.1944	10.9932	11.226	11.2943	11.941	10.9135	11.8228	11.6207	12.2882	12.1771	12.5656	10.842	12.0298	9.95282	11.4263	12.7642	10.4439	11.4182	11.6548	11.5088	11.0591	12.311	10.8876	12.1228	11.0697	11.7066	11.484
WDR47	3.35e-18	11.5993	10.6855	11.0936	10.2473	10.9639	11.2418	10.1953	11.0157	10.635	11.1147	10.2027	12.1912	10.6877	10.8138	11.7146	12.4411	11.4635	10.5348	10.5959	10.2143	11.3214	10.6669	10.4929	11.0323	11.2391	11.0272	11.8584	11.0377	11.0928	11.7048	11.2122	10.642	10.9464	11.5312	12.2494	10.815	10.5554	10.2858	10.6715	10.7827	11.3223	11.0422	10.7062	10.4245	11.3562	10.9238	10.6723	11.0976
TINCR	3.46e-18	6.85672	6.6597	6.4854	6.21269	6.653	6.88016	6.40509	6.96038	6.0552	6.71187	6.55408	6.56203	6.84936	6.6572	6.86445	7.41779	6.94796	6.98686	6.25688	6.37633	6.79132	6.68787	7.03079	7.02607	6.93091	5.99212	6.12145	6.61413	6.48226	7.22004	6.09488	6.32587	7.28954	7.07434	7.52026	7.30394	6.58009	6.54907	6.61529	6.59705	6.47798	7.12249	6.31926	6.49689	6.95369	6.83937	7.03417	7.31423
KDELR2	3.5e-18	11.7738	11.5164	11.41	12.0762	10.9818	11.9852	11.914	12.6789	12.1303	11.4228	11.0831	11.5958	12.5534	11.857	10.5983	10.2881	11.5684	12.113	12.5105	12.0477	12.1508	12.0459	12.1983	12.1875	11.9867	11.7902	11.8885	12.3929	11.875	11.903	11.9015	11.8809	12.0298	12.1896	10.2898	12.1264	12.5534	11.8494	11.8184	12.4554	11.7043	11.1742	12.1548	11.8053	11.1869	11.6919	12.3064	11.6136
STX1A	3.53e-18	9.87963	8.26624	8.852	8.0179	8.36054	9.33798	8.25967	8.47998	8.52674	8.97239	7.65038	11.0852	8.08031	7.5989	10.0525	11.4292	7.91563	8.1628	8.31266	8.14507	9.25633	8.48344	8.47209	9.07384	8.71129	8.50424	10.3253	9.09159	8.77341	7.7025	8.59177	7.22422	8.38856	8.98227	11.875	6.85922	8.63764	5.73197	8.3327	8.66343	9.21922	8.26649	8.03594	8.5693	8.26065	9.24881	8.01477	8.3905
NRXN3	3.54e-18	8.50811	6.58873	8.16132	5.27551	7.63912	7.78108	4.93597	7.2314	5.33229	8.59607	7.91423	8.96186	6.82619	7.30909	9.28907	10.0861	7.56012	6.56293	8.7761	6.13891	7.86753	8.57832	7.68045	8.60051	8.62165	6.53346	9.05672	7.63462	7.84451	6.80668	5.47393	5.86679	7.78868	7.87118	10.3291	7.15729	7.35271	9.43748	8.37737	7.71168	7.82209	8.64924	6.15785	6.86768	8.2922	7.73029	6.85747	5.65999
CDKL2	3.58e-18	7.29866	5.47393	7.81265	4.68231	7.46632	7.4026	5.55455	6.04033	5.80736	7.30909	5.67227	6.87051	6.75075	6.83043	8.50265	8.89018	6.41542	4.98434	6.44836	5.93923	7.69441	6.56423	4.32705	7.08723	6.2139	5.16791	7.62056	6.03085	6.87233	5.20149	4.75774	5.03771	6.47044	6.41523	8.53058	5.48431	6.36087	6.767	6.21631	4.94077	6.35361	5.96325	6.25571	7.08666	6.85643	7.15195	6.15821	6.16176
NAPG	3.63e-18	9.37707	9.31277	9.85454	9.41999	9.65316	9.60791	9.54318	9.54378	9.26992	9.64	9.91025	9.84739	9.27316	9.60791	9.95908	10.7328	9.59344	9.46385	8.88385	9.15588	9.50118	9.91334	9.62896	9.76958	9.04483	9.67425	10.1418	9.81305	9.51456	8.30506	9.03113	8.76456	9.6329	9.42298	10.6142	9.11233	9.52161	9.68627	9.25689	9.47975	9.37893	9.65857	9.4356	9.7125	9.44806	9.72245	9.33855	9.53979
HEATR2	3.72e-18	9.77306	9.8209	9.41015	10.1093	9.41484	10.1097	10.2411	10.635	10.2496	9.96504	9.36351	9.69068	10.8121	9.64711	9.09317	8.89386	10.0028	10.1399	10.6958	10.4453	10.2599	10.2789	10.0036	9.69627	10.1993	9.76524	9.39065	10.2364	10.1188	10.2683	10.3066	10.2228	10.1053	10.5424	8.95624	10.0053	10.1131	9.40733	9.38097	10.1322	10.0815	9.82185	10.0809	10.3862	9.67077	9.76745	10.234	10.6963
CLIC1	3.76e-18	11.4902	12.5751	11.7507	11.6893	11.4522	11.8702	11.7589	11.598	11.9252	11.744	9.60129	11.3776	12.2757	11.1646	9.86747	9.46842	12.2518	12.8736	11.8106	12.4365	11.4654	11.2595	12.5227	11.6893	10.5733	12.4639	11.3608	11.4664	11.7546	11.4593	10.741	11.8734	11.2912	11.1295	9.39264	11.5466	12.3155	12.4826	12.2688	12.3583	11.7385	10.1576	12.81	12.2358	10.972	11.3336	12.444	11.6883
IQSEC1	3.97e-18	10.1927	9.57163	10.1969	9.03164	10.0688	9.77562	9.59686	8.89308	9.27804	10.0684	9.31763	10.4196	9.68874	9.64856	10.295	11.3316	10.1864	9.40763	9.2075	9.32794	9.25989	9.9589	9.77276	10.0613	10.0268	9.64087	10.9129	9.22371	9.67524	9.47219	9.50645	9.38565	9.77893	10.0474	11.4698	9.85763	8.73978	9.96822	8.96597	9.13363	10.0948	7.60053	9.45517	10.1977	8.768	9.79706	9.75965	9.83205
CCDC80	4.12e-18	7.86345	9.17036	7.84076	10.6836	8.32973	9.35935	10.5474	9.11001	10.5443	8.66253	9.60878	8.33747	10.3923	8.91749	8.72832	7.15751	8.94206	9.92354	9.85193	9.63129	7.87928	9.00996	9.06788	8.69101	9.12927	9.649	9.1742	8.92103	9.1634	9.78834	9.66729	7.99551	7.11806	10.2183	7.32953	9.87647	8.97492	9.49173	8.60209	8.52674	7.83284	9.27601	10.0915	9.66584	9.04115	9.78044	9.93015	9.06491
LRP10	4.16e-18	10.1598	10.6794	10.2937	10.0198	10.3018	10.6041	9.98831	9.54906	10.3807	10.0296	10.3185	9.2324	10.6549	10.2815	9.76909	8.79421	10.0342	10.1193	10.3874	10.3874	9.69863	10.2052	10.5151	10.0222	9.97849	10.4703	9.65857	10.1242	9.9663	9.51263	9.72398	9.49945	9.59139	9.76622	8.89193	10.183	10.4342	9.87963	10.1514	10.5075	10.3102	10.5145	10.3843	10.4085	10.0412	9.91499	10.5754	10.5518
SSR2	4.43e-18	11.2365	11.8765	11.4992	12.4229	11.4426	11.8854	12.5132	12.0687	12.113	11.8716	11.7998	11.8494	11.9062	11.623	11.5175	10.6958	11.7199	11.801	11.7738	11.9917	12.0372	11.7093	12.2358	11.6385	11.9743	11.9779	11.4479	12.6391	12.082	11.7507	12.7682	11.914	12.2229	12.0863	10.6887	11.9329	12.2384	11.804	12.4798	11.9901	11.7672	11.6844	11.9619	11.6611	12.2131	11.5532	12.2824	12.6573
BARD1	4.5e-18	9.59328	10.2794	8.81043	9.93312	9.24173	9.64384	10.0477	9.6714	9.67679	9.31587	8.36542	9.56233	9.4111	8.97723	7.97812	7.90196	9.38606	10.0927	9.00652	8.95881	9.87209	9.19904	9.42098	9.62424	9.7035	10.1064	8.63591	9.68842	9.86912	10.4294	9.69398	10.5035	10.4161	9.97745	7.44275	10.125	9.87312	8.42014	10.1489	10.2607	9.43986	10.2889	9.89858	8.59201	9.44047	8.96919	9.1406	10.2027
HAT1	4.56e-18	10.3629	10.994	10.3359	11.3204	10.0488	10.9046	11.0898	11.131	10.8903	9.56008	10.6425	10.3963	10.9905	10.2216	9.60675	9.55072	10.7268	10.9501	11.1178	10.2287	10.3408	10.4134	10.9155	10.0854	10.3931	10.5051	9.96413	10.8093	10.421	8.72806	10.1258	10.4596	10.0944	10.7274	9.75077	10.3888	10.9557	10.5248	10.1841	10.3927	10.1202	10.3539	11.0052	10.1692	10.6799	10.295	11.0207	10.5133
MCL1	4.64e-18	10.6425	11.8899	11.4332	11.1051	11.0782	10.8239	11.0515	10.8354	11.2508	11.2426	10.4071	10.2442	10.8673	11.1418	10.4034	9.28003	11.0614	11.748	10.526	10.7756	10.7581	10.9478	11.3962	10.5469	10.901	11.4794	11.1023	10.9812	11.3435	12.0495	11.0129	10.9205	11.3786	10.791	9.87144	11.0052	11.7361	10.8283	11.8554	11.2843	11.3325	10.7388	10.9771	11.1893	10.6273	10.877	11.3902	11.3661
SRGAP1	4.66e-18	9.84657	9.16738	9.07384	9.07609	9.00968	9.41437	9.12823	9.50554	9.51541	8.54364	10.0655	9.47126	9.59405	9.28386	8.83069	7.92663	8.59744	9.29151	9.34614	9.08518	9.64266	9.81475	8.0991	9.73407	10.1738	9.82025	9.04265	8.89373	9.64622	9.22961	9.83374	9.21456	10.524	9.83577	8.06552	10.0735	9.81868	9.4114	9.61346	9.41569	9.72732	9.66953	9.24099	9.41225	8.66844	11.8765	9.12192	8.67394
DDHD2	4.75e-18	10.5383	9.37077	10.8722	9.32272	10.9362	10.1521	9.76507	9.5317	9.90765	10.2384	10.1394	10.7006	9.59746	10.2155	11.2333	11.364	10.7006	10.0028	9.93086	9.0455	10.45	9.86376	9.51569	10.2768	10.5993	9.84753	10.9015	10.3291	10.0344	10.3106	10.1478	10.3046	10.041	10.2151	11.3523	9.90516	9.66274	9.99591	9.47357	9.33798	10.5499	10.3442	10.1514	9.55909	10.2221	10.3615	9.56183	10.226
SEC11A	4.82e-18	11.8825	12.1626	12.0182	12.2941	11.9062	11.5684	12.311	11.7241	12.3417	12.2004	11.7619	12.1749	12.0703	12.1771	11.8796	10.8267	12.1568	12.6987	11.6496	11.7266	12.0988	11.6871	12.3856	11.9441	11.4415	12.2447	11.5175	12.3341	12.3086	11.7532	12.6296	11.9531	11.8463	12.3391	10.8267	12.3341	12.1912	12.5132	13.1843	12.5599	12.0459	12.5627	12.5656	11.8765	12.5871	12.2427	12.1933	12.3202
PVRL1	4.86e-18	7.55238	7.29086	7.97711	7.49169	7.52853	7.59811	7.02114	7.63962	7.10025	7.5295	8.06614	7.73104	7.15181	7.34545	8.69002	8.27748	7.66072	7.07229	7.56096	7.91372	7.5876	7.52797	7.36936	7.48016	7.99941	7.15195	7.71897	7.40493	7.22575	7.82054	7.59055	6.82067	7.02573	7.5155	8.99055	6.88156	7.1339	7.00866	7.48093	7.63727	7.37156	7.34417	7.33366	8.06421	7.61857	7.02863	7.1862	7.40188
TTC9B	4.98e-18	6.25026	4.1953	5.67146	4.18397	4.58443	4.75879	5.60499	4.51805	6.49155	5.06089	7.68959	6.94138	3.69994	5.56939	8.05998	8.19692	5.50109	4.24982	4.95452	5.56542	6.31602	8.17343	5.10123	5.04152	5.84818	5.30706	6.84294	5.2002	5.19096	4.94473	3.7788	4.89856	7.49169	6.8464	9.51541	4.91092	4.02121	4.07768	6.36175	5.7555	5.04486	5.48201	4.629	4.6645	6.17926	5.20705	3.71415	4.01491
MVB12A	5.04e-18	8.96929	10.4511	8.95048	10.2881	9.62238	9.71371	10.3607	9.51376	10.485	10.2244	9.72049	9.07777	9.95576	9.90858	9.31794	7.78385	9.73249	9.42476	10.2403	11.1372	9.26918	9.55023	10.1334	9.23854	9.48217	10.1629	8.51708	10.421	9.55545	10.269	9.26836	10.1772	9.26851	9.94949	7.53548	10.0477	10.1219	9.91729	10.3464	9.94068	10.0742	9.63774	10.601	10.3316	9.97077	9.5796	10.1324	10.3116
POLR3A	5.2e-18	7.28293	7.14599	7.19591	6.90408	7.58471	7.3834	7.36826	6.93806	6.75304	7.64201	7.03685	7.78573	6.87264	7.47002	7.70266	8.13638	7.00856	8.0843	6.78036	7.13285	7.01147	7.23379	7.33424	8.35157	7.20906	7.64434	7.47744	7.49395	6.86188	8.0902	8.37894	6.98111	8.76774	7.12552	8.31564	7.78784	8.4061	8.09743	8.27966	6.8668	7.50471	8.89193	6.75481	7.26503	8.63228	7.90525	6.74293	7.22535
R3HDM1	5.2e-18	10.3862	9.75207	10.1254	9.72881	9.65807	9.94589	10.0039	10.075	9.51831	10.1969	9.81802	10.8126	9.40929	9.75739	10.6171	11.4201	9.49442	9.70411	9.26879	10.0771	9.95458	10.1204	9.22075	10.5715	10.4646	9.53277	10.9925	10.0184	10.2573	10.3517	9.43068	9.90697	8.79772	10.5293	10.9605	9.9029	10.0609	9.49991	9.85193	9.72637	9.75891	9.82984	9.84253	9.83902	9.47048	10.1598	9.70282	9.3735
HMGCLL1	5.23e-18	6.94737	5.57783	7.21848	6.15033	6.57603	6.65572	5.6423	4.79289	6.06777	6.79722	5.62917	7.27446	5.04802	6.38372	8.29025	8.76902	7.44528	6.93439	5.99649	5.99979	4.82998	6.22343	5.43543	6.50669	6.24216	5.0999	7.7821	6.54524	8.07755	6.08424	6.30013	4.75137	6.00799	6.51403	8.49598	5.82569	5.19388	8.50201	5.89037	5.3945	6.58402	6.21008	5.23441	6.45182	6.70158	7.14951	5.65928	5.28279
LAMB2	5.25e-18	9.97077	10.5046	9.7169	10.6252	10.2114	9.60444	10.2747	9.73495	11.1139	10.2667	9.03034	9.30721	10.6662	9.54633	8.66146	8.17381	10.1616	10.3657	10.0581	10.6127	8.99156	9.63519	10.5766	9.24939	9.32378	10.7472	9.5789	10.1267	9.34471	10.9911	9.55995	10.7407	8.39038	10.3342	7.83734	9.92619	9.85101	11.8245	10.146	10.0809	10.4548	10.0917	11.1058	10.8199	9.5294	9.70455	10.6431	10.3851
SLC7A14	5.28e-18	8.29897	7.37092	9.51242	5.93518	8.198	7.88393	6.28097	6.72083	6.89477	7.99551	9.90432	8.03301	6.8627	7.58185	9.14449	9.7339	7.09828	6.88887	7.32465	7.13517	7.92536	7.53758	7.12161	8.66301	7.68231	7.30768	9.00721	7.51524	7.73057	7.83392	7.28954	6.16637	6.85135	7.48437	9.73192	5.61134	7.15729	6.48865	7.17932	7.39864	8.009	6.81642	6.32232	8.33205	7.56504	7.92079	6.89843	6.30188
WWTR1	5.46e-18	11.0436	11.3477	11.0944	11.2772	11.1919	10.039	11.125	10.8518	10.9353	11.2418	10.2321	9.57308	11.5616	10.4646	9.7592	7.5951	11.0135	11.8121	10.6915	10.4129	10.0681	10.3884	12.6296	10.5273	9.68505	11.5874	10.7969	10.2003	10.6549	10.8555	10.1868	10.9953	10.409	10.0056	8.42177	11.3562	10.4797	11.0614	10.4102	11.1073	11.0697	9.63244	11.6313	11.6195	9.68107	11.0641	11.3523	10.9112
DACT3	5.86e-18	9.96968	8.974	10.224	8.98405	9.858	9.21671	8.86361	9.46584	9.79286	9.82616	9.80119	10.2284	8.97386	10.0617	10.2966	10.6849	9.20243	8.44943	9.43018	10.0563	9.87696	10.0089	9.34057	9.86912	9.4056	9.48185	9.7643	9.42853	9.83968	8.75673	9.2803	9.74672	9.2803	9.80413	10.8722	9.39038	8.89504	9.16948	8.76585	8.86932	9.43703	9.75018	9.64954	9.75018	10.1672	9.34442	10.025	8.71562
LARGE	5.97e-18	8.70747	7.58096	7.70053	8.05751	8.13437	8.80262	8.42177	8.18756	8.41349	8.54623	9.03927	9.52467	8.38919	8.53784	9.28416	9.79541	8.4606	7.93082	9.30893	8.54172	8.39731	9.09971	8.66213	8.88025	7.9561	8.45147	9.21699	8.55549	8.63999	7.52272	8.41135	8.07058	7.88001	8.47502	10.0556	8.62919	8.77502	7.69375	8.47408	7.85823	8.45401	8.67282	7.54324	8.57319	8.76716	8.60169	7.31513	7.87204
SGOL2	6.16e-18	8.4614	9.11697	7.71761	9.41806	7.79097	8.89308	9.53012	9.73249	8.63565	7.95388	7.54785	9.43875	8.75702	7.89513	7.66191	7.36146	8.15237	8.67051	8.37524	8.35901	8.15237	8.97699	8.36569	8.94683	9.33726	9.34655	8.1144	9.07544	9.41239	9.22767	8.57007	9.09249	9.18404	9.68285	7.15374	8.47434	9.15902	7.82067	9.02297	8.73079	8.82379	7.95837	9.02748	8.4204	8.93937	7.62865	9.00721	7.65755
CMTM3	6.19e-18	9.66124	9.90995	9.99962	10.4624	9.64983	9.07279	10.2003	9.96435	10.4178	10.112	9.3652	8.97686	10.3202	10.1857	8.61903	7.14879	9.72277	10.7687	9.07256	9.98484	9.24551	9.60555	10.3811	9.95118	9.69398	10.0731	9.30808	9.65127	9.55379	9.61584	9.47452	9.93701	10.236	9.68089	7.88013	10.276	9.23854	10.8486	9.60766	10.2597	9.69191	9.86678	10.2388	9.81737	10.1746	9.96011	10.2658	9.46947
DGKE	6.35e-18	6.51229	5.83275	7.11073	5.98003	6.6423	6.33545	5.85666	6.35153	6.40051	7.12265	5.65489	7.30186	5.88019	6.42132	7.07405	8.41886	6.03103	6.51036	6.32873	6.65364	5.36648	6.77199	6.16126	6.65033	5.79424	6.171	7.33804	6.79375	6.65364	6.47744	6.28425	6.08524	7.94192	6.01985	8.2104	6.10503	6.41867	8.16712	7.08053	5.95659	5.94952	6.0763	5.70475	6.88782	6.00164	6.51912	6.19284	6.64605
DUSP7	6.54e-18	8.6241	8.19898	9.2737	8.35249	9.62954	8.82889	8.31188	8.62165	8.25437	8.44354	8.63284	8.51444	7.91903	8.69927	9.2621	9.19513	7.56205	8.35861	7.53215	8.10155	8.62838	8.92788	8.0323	8.76663	8.72832	8.19123	8.50372	8.56798	8.77515	7.35806	7.35286	8.27527	8.45733	8.05371	9.7489	7.30506	7.70885	8.37803	8.45525	7.30173	9.0941	8.37051	8.32916	8.10756	8.49255	8.31606	8.25437	8.287
CLSTN3	6.67e-18	8.58957	8.3415	8.08969	8.42187	7.84173	8.71768	8.11304	8.2209	8.22222	8.29186	8.17408	8.84666	8.47195	7.37338	8.86347	9.23374	8.89139	8.85118	8.7373	8.19082	8.16785	7.95772	8.28521	8.66176	8.42755	8.01667	9.42735	8.88819	8.44857	7.68879	8.76313	8.15878	8.04386	8.7402	9.78629	7.63436	8.38356	8.84732	8.7904	7.60097	8.22805	7.92536	7.83163	7.94468	7.70755	8.18458	8.13415	7.87814
TGIF1	6.86e-18	8.54199	9.95051	8.49434	10.1676	8.7029	9.46314	9.92752	8.40585	9.66214	9.00504	7.81693	8.42302	9.35037	8.2098	7.08284	6.96574	8.93363	9.18817	8.72324	8.82057	8.64876	8.54199	9.67329	8.86932	8.20201	9.45207	8.05951	9.16861	9.37033	8.06052	10.0775	8.77153	9.74863	9.17007	7.05582	9.26366	9.12328	9.24966	9.70266	9.00236	8.52634	8.38179	9.66124	8.55773	9.48233	8.64192	9.50236	9.33039
NKIRAS1	7.03e-18	9.65582	8.90926	9.70315	8.94903	9.30482	9.11404	9.06225	9.22566	9.23684	9.52064	10.1498	9.77719	8.81694	8.84289	10.1381	11.0033	9.62114	8.67554	9.53436	8.34623	8.94849	9.39669	9.07303	9.55729	9.2737	9.10382	10.3677	9.63075	9.50384	8.70893	7.93217	8.47852	9.34981	9.05245	11.0393	8.82545	8.36418	9.11287	9.20658	9.03428	9.10134	9.60922	8.77327	9.37893	9.65174	9.60617	8.90636	9.9395
DLGAP2	7.06e-18	8.16229	6.1727	8.12543	6.55267	6.86728	7.15462	6.10993	6.39406	6.58269	7.80861	6.92336	8.64582	6.54612	5.91928	8.36823	9.89513	6.91092	5.82273	6.32066	6.21162	6.68395	6.83871	5.80027	7.81088	6.5666	6.03896	8.66764	6.94491	7.28412	6.79908	6.09265	6.99075	6.42148	8.48511	9.48555	6.56481	6.6291	7.18011	6.01608	6.17892	7.25862	6.95369	6.31808	5.84249	6.33903	6.98089	6.26341	6.21748
PPP3CB	7.25e-18	11.096	9.84916	11.0584	9.54573	10.2147	10.4748	9.71855	9.96307	9.10455	11.1492	10.6763	11.7006	9.87963	10.2332	11.5376	12.0978	10.4605	10.0948	10.1262	9.34	10.408	10.0094	9.80578	10.9751	10.3954	9.35023	11.8854	10.3559	10.5443	9.99735	9.50118	9.29811	10.5959	10.8306	12.3086	10.4816	9.74195	11.0474	10.6903	9.8238	10.6003	10.8655	9.56413	9.78939	10.4952	10.638	10.1032	9.34899
CD44	7.35e-18	11.411	11.5566	10.8367	10.0674	10.4548	11.6286	9.60878	10.3773	10.9478	10.6166	11.2753	10.0822	11.8152	10.618	8.95103	7.38923	11.449	12.039	11.9122	11.0831	10.8795	9.98893	11.914	11.1388	9.21726	11.4727	10.3236	10.825	10.6987	11.8053	10.5302	10.6046	10.4375	10.6072	7.55226	11.0717	11.2824	9.99369	11.3795	12.0601	11.4311	11.3696	10.9258	11.5013	10.5494	11.6718	11.7043	12.0668
LRR1	7.41e-18	8.10137	8.37577	7.93735	8.69558	7.77404	8.39975	9.00667	8.23707	8.20614	7.81584	7.56996	8.61889	8.22867	8.0239	7.25345	6.85976	7.37576	8.44728	8.09277	8.89657	7.70011	8.45733	8.30624	8.25409	8.37972	8.47759	7.59629	8.48293	8.57046	8.27979	8.42466	7.88508	8.82431	8.00674	6.88156	8.15431	8.78377	7.90564	8.60156	8.63552	8.1752	8.40914	8.63999	7.49649	8.95291	7.64611	8.60693	8.29986
SLC9A6	7.43e-18	11.5707	10.0267	11.2569	10.6866	11.1646	11.7066	10.8483	10.5649	10.5883	11.5993	11.2164	12.1664	10.6355	11.497	12.0906	12.5871	10.78	10.2586	11.2203	11.0883	11.0914	10.972	10.142	11.3279	11.292	10.763	12.0742	11.1911	11.3185	11.6089	10.8699	10.9181	11.0356	11.3435	12.3017	11.2779	11.486	10.1961	10.763	10.6041	11.4563	11.3912	10.2394	10.8763	11.0641	11.4311	10.6021	10.6112
RTN4RL2	7.56e-18	5.33286	3.9373	4.13315	4.78953	4.38218	4.30162	5.03114	4.77602	3.5625	4.89666	4.43491	7.75609	4.38375	3.91867	6.70068	7.05076	4.78665	3.96762	2.95804	4.52884	5.21002	6.5929	4.36972	6.78951	5.9451	4.57606	6.68067	4.7233	4.6322	4.15538	2.2594	3.80083	8.07907	5.26534	8.18384	3.44482	3.74201	3.98078	5.17697	3.66869	4.72949	4.74418	5.16247	5.36438	4.39936	4.67235	2.95327	4.70136
HYAL2	7.65e-18	9.21334	9.83035	9.84975	10.1101	9.31979	9.93434	10.0152	9.97029	10.1359	9.86766	10.0227	9.32191	9.89397	9.30011	8.82431	9.39222	9.22038	10.2783	9.57785	10.6774	9.40438	9.79509	9.94447	9.541	9.5093	9.95359	9.24133	9.90155	9.58374	9.36493	9.66729	9.90781	9.56098	9.50309	9.08848	9.39929	9.4748	11.1161	9.59372	9.59344	9.96875	9.65356	10.3735	9.90446	10.0452	9.38924	9.89497	9.84989
DDX39A	7.94e-18	11.1701	11.1302	10.6598	12.0372	10.8583	11.8974	12.1324	11.7938	11.8584	11.1161	11.3223	11.3795	10.9646	10.6242	10.6196	9.63212	10.3351	11.4544	11.6785	11.9743	11.3532	11.3931	11.0046	11.8106	11.6006	11.565	10.2228	11.5454	11.6744	12.2824	11.1447	11.9641	11.5963	11.6597	9.77719	11.598	11.9252	10.7184	12.5359	11.6683	11.8477	10.9557	11.81	11.1066	11.6275	11.3724	11.4263	10.8132
HLA-E	8.18e-18	12.2447	12.5105	12.3806	11.484	12.3583	11.7575	11.4041	11.5627	11.3523	12.0795	11.3006	12.0408	11.9202	12.3417	10.8948	10.6982	12.2151	12.1664	12.2409	12.8136	11.2902	11.3837	11.893	11.7466	11.1342	11.6611	11.728	11.8216	11.6124	10.7565	11.8391	10.8205	10.5684	11.5247	10.4624	11.7631	11.8053	12.7517	11.673	11.584	11.8391	12.1228	11.8675	12.2647	12.0336	12.2468	11.7199	11.616
CKS2	8.3e-18	10.8018	10.7858	9.27587	11.3477	8.33296	10.2422	11.591	12.2189	9.90474	9.94627	9.51541	11.409	10.1295	8.30475	8.58678	7.26272	9.94838	11.1742	10.4196	11.2065	11.0079	11.1007	8.88967	10.5098	10.7206	11.0107	10.0267	11.8631	10.8711	11.8274	10.1847	12.0234	10.3781	11.1646	7.84145	10.3848	11.8121	9.29767	11.1132	10.6936	10.6783	10.3412	10.8731	9.64814	11.9763	9.55037	10.9653	10.6593
BCL2L2	8.58e-18	10.2007	9.86912	10.4673	8.93064	10.317	9.68491	8.98405	8.37172	8.45953	9.7068	9.98023	10.0345	9.44279	9.61638	10.803	11.1766	9.61185	9.16889	10.2236	9.10411	9.16505	9.20989	9.89433	9.80887	9.48514	9.49651	10.5913	9.69919	9.95908	8.72447	9.31094	8.29828	9.42013	9.14508	11.131	9.19796	8.51865	8.61626	8.80514	9.24099	9.81156	9.03632	9.66514	9.08181	9.32257	9.92715	9.27013	9.59974
CALD1	8.58e-18	10.4375	11.0157	10.3464	10.7274	10.5574	10.7088	10.4896	10.0541	10.2892	10.8735	9.49027	9.25249	11.2253	9.99035	9.09022	8.82803	10.4104	11.2688	10.5216	9.90021	10.7494	10.2183	11.2737	10.7237	10.3089	11.2962	10.531	10.8608	10.4741	10.2611	10.1582	10.8234	9.84588	10.3425	8.58249	10.6211	10.9599	11.4643	10.5266	10.8776	10.8245	10.2802	10.5684	10.4591	9.84383	9.95282	11.2805	11.1734
CCNY	8.67e-18	9.29781	9.16584	9.58186	8.80378	9.95282	9.16738	8.77528	9.61412	8.91445	10.0177	9.52308	9.51999	9.25354	9.61468	10.2703	9.86747	9.79772	9.63194	8.96759	8.78752	9.36861	9.05725	9.51625	9.77658	9.36203	8.85063	9.66241	9.24524	9.16979	9.03632	8.36463	9.25383	10.0893	8.93087	10.3081	9.72063	9.06514	11.2155	9.58546	9.50645	8.93118	10.2063	9.20671	9.37088	10.2225	9.50147	9.00938	9.0614
RAPGEFL1	8.71e-18	7.79639	6.34601	5.91278	5.47393	6.12163	5.11167	7.37633	4.84474	5.22118	7.27192	7.43216	8.08981	6.01315	5.1795	8.82096	9.55365	5.69175	4.76644	5.70651	5.17329	6.10807	6.06149	6.91359	6.35588	5.80905	4.3069	8.601	5.75042	5.13402	5.39987	3.44135	6.01054	6.1079	6.82591	9.3784	5.85555	4.47447	4.77633	5.38474	4.84247	5.69849	6.09422	4.30887	4.13075	7.07891	6.03658	5.2517	7.13872
AKAP5	8.81e-18	6.05145	5.92092	6.00554	6.55513	4.90747	5.93132	6.27348	5.78682	5.04534	6.13839	5.85289	7.33484	4.29115	4.98475	6.48847	8.06754	5.91734	5.17661	6.08279	5.86304	5.32285	6.42882	5.57855	6.35324	5.82174	4.7971	7.27069	5.74572	6.56992	4.55783	5.45348	4.96136	5.52526	6.95976	8.53622	5.12664	5.81158	4.29715	6.16742	3.24267	5.93518	5.17329	5.67864	5.51716	5.4112	6.1652	5.96577	3.25205
SERPINA3	9.18e-18	14.5934	14.4478	14.7407	11.3599	14.5685	14.5488	11.748	11.7659	13.4505	14.6787	13.7214	12.8256	13.3735	14.4055	11.5993	9.69355	14.9242	13.8995	14.6234	12.4853	14.3249	13.6985	13.4768	14.4055	13.777	14.4262	12.8824	13.6322	14.5488	13.0986	12.2179	13.4505	12.1486	12.817	9.35037	14.472	12.5656	10.8693	14.0148	15.0178	14.4262	14.1766	13.1843	14.4262	13.7449	14.6787	14.5231	13.6082
PPP1R3F	9.4e-18	7.69416	7.19282	7.82589	6.91876	7.37029	7.41779	6.17182	7.32998	7.17774	7.56677	7.80478	8.17475	7.29112	7.42259	8.06478	8.79493	7.09018	6.9994	8.04676	7.43277	7.34838	7.02345	6.87024	7.4197	7.66746	7.25203	8.04354	7.18035	7.76177	7.76503	7.84475	7.48145	7.39503	7.87012	8.47889	7.22108	7.14312	6.82332	7.25461	7.69935	7.53349	7.72728	7.26665	7.12753	7.75578	7.01339	7.48636	7.74089
HLA-J	9.55e-18	11.2246	13.1293	11.5532	12.5717	12.0724	11.1547	11.903	11.6611	11.4236	10.523	11.5422	11.3941	12.4554	11.3776	9.92619	9.32516	11.8435	11.9284	12.3583	13.6468	10.9112	10.865	12.8301	11.3687	10.7029	12.1303	11.0591	11.914	10.7772	9.90021	11.7816	11.2779	10.4934	11.1302	9.54004	10.9646	10.8627	12.1531	12.2049	11.4282	10.6477	11.3552	12.136	11.6363	11.5555	11.4362	11.0599	11.0558
MPP7	9.6e-18	6.54708	6.42302	6.12351	6.13937	6.20259	6.43063	6.55551	6.13518	6.62414	6.74082	6.16373	6.51366	5.90355	5.86703	6.52389	7.36323	6.80519	6.10677	5.8093	6.25758	5.46743	6.17541	5.69893	6.46025	6.03515	6.55588	7.04881	6.09037	6.25758	6.2406	6.33841	5.67522	6.04011	6.51229	7.38265	5.37279	5.76015	6.35571	6.1103	6.36496	5.72535	6.02413	6.34217	6.3665	6.10503	5.86088	5.88294	6.54612
GRIN2B	9.89e-18	7.09573	6.49426	6.82757	6.40291	5.17329	7.10644	5.50418	5.91501	6.09445	6.73968	6.48353	7.38594	6.37449	6.39135	7.14854	7.15707	6.35172	6.01799	5.98651	5.51226	6.97489	6.56588	6.26283	6.71338	6.52149	6.61491	7.31	6.57225	4.43112	6.1608	6.49055	6.56351	6.93311	7.06832	7.57419	5.41283	5.02918	6.85101	6.72353	6.11063	6.67234	6.29118	6.0281	5.80957	5.98613	5.67864	6.88195	6.16742
FBXW7	1.02e-17	9.71988	8.52308	9.22742	9.02382	8.61876	9.29891	9.09886	8.56485	8.98836	10.0995	8.76926	10.6166	8.78454	9.47928	9.79602	11.2458	8.70882	8.24822	8.91497	8.32731	9.17714	9.21619	8.78086	9.66395	8.68989	8.59553	10.6779	9.03565	9.22909	8.20031	9.70709	8.03512	8.82211	9.51488	11.3894	8.77153	9.24074	8.94527	8.58344	8.39625	9.25107	8.72556	8.61688	9.18908	8.6238	9.30302	8.82455	8.2405
NDEL1	1.05e-17	9.50005	9.20897	9.41671	9.15121	9.10122	9.3063	9.21534	8.22406	9.27709	9.57994	8.99764	9.51205	9.42937	9.03511	9.77342	10.5424	9.42069	9.37404	9.41254	9.4227	9.48701	9.32724	9.45956	9.43662	8.58779	9.66332	10.1365	9.0045	9.28799	8.06478	8.34248	8.88702	9.07982	9.30064	10.0264	9.26006	9.53153	9.95656	9.58337	9.62984	9.4977	8.9122	8.98681	9.33512	8.89671	9.22616	9.49681	8.56071
FCGRT	1.06e-17	10.6751	11.4675	11.292	11.2317	11.0073	10.9022	10.9187	9.97177	10.8	10.9418	9.70743	9.70187	11.2753	11.2203	9.74441	9.41073	11.3031	10.8821	10.8157	11.6683	10.2947	10.7921	11.2745	10.3923	9.68976	10.295	11.2391	10.5481	10.4673	8.98162	10.1313	10.5348	8.8159	10.2469	8.39119	10.7996	10.9418	11.166	10.1352	10.9425	11.3983	11.4935	10.8471	11.4253	11.4282	10.6201	10.6455	11.0253
PPP3R1	1.11e-17	8.58752	8.4762	8.66372	8.22918	8.0253	8.38281	8.24727	7.67229	8.09249	8.61983	8.53563	9.17188	7.93503	8.69309	8.29123	9.54888	8.11838	8.74344	8.09782	7.59146	7.88211	8.3138	8.11771	7.59877	8.16824	8.63093	9.36383	8.58586	7.79609	8.15963	8.17702	7.69148	8.67086	8.69241	9.76607	8.50019	7.8531	8.29037	7.93867	7.9503	8.72908	8.57683	7.68693	8.26279	8.0294	7.92243	8.38753	8.08842
ASPM	1.15e-17	8.45425	8.65403	7.01368	9.35299	5.9796	8.54926	9.54432	9.14048	7.84596	7.27158	6.23867	9.06238	8.14507	5.62269	5.2885	5.85289	7.53418	8.54868	7.77817	7.59931	8.78287	9.01977	7.88291	8.92169	8.94805	9.06906	7.88211	9.12651	8.92103	8.88848	9.46554	9.79569	8.72413	9.361	5.74105	8.49968	9.84418	6.44612	9.2899	8.5753	8.33984	7.84023	9.02326	7.04383	9.52777	7.51258	8.64798	7.21551
LRRC8B	1.15e-17	8.7346	7.9634	9.25713	7.47156	9.1668	8.30906	7.93601	9.04302	7.09423	9.05396	8.39569	9.42098	8.36463	8.19189	9.43325	10.0695	8.4465	8.50734	8.72192	6.52861	9.32938	8.20177	8.18435	9.05862	8.95235	7.79168	9.56915	8.44441	8.58638	7.03548	8.03549	8.52581	8.69609	8.34511	10.0606	8.15347	8.16606	6.75685	8.8706	8.04007	9.04238	9.3784	7.44773	7.70594	9.06967	8.92934	7.97181	9.05752
MUM1L1	1.16e-17	7.76515	5.82773	7.20812	4.8008	7.30031	7.39105	6.61703	7.73333	2.45764	7.97501	6.15033	8.60385	5.29446	6.01754	9.07356	10.0548	6.55667	5.97227	6.56264	6.46882	7.20893	6.71954	7.63783	7.45801	8.35759	6.37449	9.44995	6.83679	6.9923	5.47057	6.54057	7.22535	6.72293	4.57727	9.21971	5.71596	5.10231	8.44341	6.01985	6.71167	7.05972	6.94324	5.81396	6.59984	6.20181	6.96715	6.88195	6.01826
CENPK	1.17e-17	9.26055	9.17174	7.11465	9.92135	6.57735	8.82468	10.1182	10.1288	9.17394	8.50358	6.18197	9.39815	8.93389	7.20132	6.36531	6.10383	8.59955	10.034	8.13118	9.48078	9.412	8.76433	8.75484	8.85907	8.4606	9.2617	8.45788	9.66953	9.80382	11.0247	9.80446	11.4643	9.33111	9.56021	5.5427	9.08764	10.1234	7.57253	8.3433	8.90841	9.31195	8.28029	9.93768	7.03954	10.1749	8.73619	8.54248	7.95784
TEAD1	1.19e-17	10.3794	10.3897	9.91867	10.7029	10.15	10.1411	10.7671	10.2815	10.8306	9.94838	10.5643	10.8627	10.5438	10.52	9.89497	9.1229	10.4924	10.7864	9.84753	10.4034	10.4112	10.7114	10.6273	9.91814	9.96219	10.53	10.1097	9.76745	10.5622	11.2895	11.2737	10.2015	10.4175	11.0348	9.07905	10.2225	11.5433	10.3976	11.0928	10.2183	10.3914	9.39471	10.3777	10.3572	9.49148	10.2806	10.4249	10.2829
CARD8	1.2e-17	9.11839	9.05169	9.3604	9.76687	9.29018	9.59059	9.62727	8.9502	9.01881	9.32223	8.54199	8.86577	8.927	9.63901	8.61876	8.4562	8.617	9.39529	8.94285	8.78402	9.05169	9.47593	8.81694	9.1016	8.68583	9.26552	8.87642	9.46152	9.20804	9.49991	9.64742	9.0075	8.31045	8.98587	7.74089	10.3372	8.72447	9.27954	9.14186	9.74411	9.22075	9.46194	9.14022	8.58998	9.2756	9.32412	9.12848	9.19821
CNTN4	1.21e-17	7.11387	5.6472	6.79193	3.69239	6.65471	6.49304	4.72046	5.8534	3.63888	7.69959	6.79217	7.89454	5.22484	6.17058	8.42547	8.78047	6.12547	5.68304	6.21586	6.05371	4.60564	7.07697	6.35343	6.35466	6.10284	6.36548	8.17544	7.09018	6.79827	5.18645	4.60937	5.67789	5.27187	6.30834	8.74119	5.08915	5.3945	6.41324	5.54379	6.30959	6.79132	5.99363	4.96308	6.15412	4.59023	6.97249	6.65655	5.00608
CAMKK1	1.25e-17	8.01996	7.89679	7.77053	6.84897	7.65545	8.25206	7.45724	7.38582	5.81535	7.98646	6.8074	8.62314	7.15876	7.36338	7.8347	9.45503	8.03921	7.49154	7.68008	8.01111	7.82624	7.84521	7.98659	7.69863	7.54505	7.4021	8.68976	7.97985	7.68091	6.94587	7.228	6.72229	7.335	8.33747	9.50844	7.47316	7.19652	7.9262	7.10554	7.50913	8.08927	7.04449	7.01175	7.8462	7.32395	8.03191	7.08537	7.59043
IL10RB	1.25e-17	9.39899	10.0793	9.65303	9.63815	9.62208	9.10534	9.53216	9.25605	9.39006	9.56973	9.37721	9.24582	9.64566	9.72978	9.18057	8.44778	9.77791	10.1746	9.5362	9.93819	9.66665	9.41985	9.97849	9.47738	9.45119	9.69627	9.49322	9.70381	9.67343	10.0022	8.84615	10.4159	9.89654	9.81637	9.20572	9.51347	9.88631	10.0497	10.5489	9.92316	9.48441	9.65289	9.54153	9.94398	9.63551	9.76092	9.85935	10.0841
CYP20A1	1.28e-17	8.32591	8.26715	8.35703	8.94942	7.96913	8.81574	9.12991	8.18714	8.7832	7.85402	8.09141	8.19645	8.69374	8.82765	8.09087	7.34473	8.60747	8.44315	8.7389	8.51935	7.70439	8.42976	8.90481	8.18292	8.24505	8.80908	7.78347	8.31473	8.63006	7.77454	7.91612	8.00202	8.50759	8.76099	6.40746	8.95687	8.34951	8.26597	8.83857	8.43031	8.42922	8.43791	8.77802	8.03052	8.26582	8.77675	8.7013	8.21405
RBBP8	1.28e-17	11.0079	10.5959	10.0113	11.0852	9.56263	10.7783	11.0416	11.4404	10.6066	10.5554	9.9289	10.6415	10.9099	10.0556	9.55238	9.29151	10.6072	11.9095	10.1969	10.5273	10.5157	10.6598	10.5117	11.1096	10.6926	10.7333	10.168	11.8509	10.8841	10.6607	10.7222	12.0354	10.8537	10.9296	9.14297	10.5284	12.2109	10.1594	10.9398	11.1096	10.8941	10.6092	11.0006	10.9785	11.1953	10.9878	11.0584	10.6278
ACOT7	1.3e-17	9.47425	8.72299	9.62424	8.86429	9.27302	9.2577	8.71535	10.1093	8.94983	9.31334	9.23434	10.2718	9.14565	8.84935	9.77413	10.8064	9.8793	9.26904	9.32488	9.81961	9.36776	8.91055	8.85669	9.82984	9.38328	9.40166	10.0676	9.83205	9.62516	9.49413	8.60919	8.45537	10.3683	9.33698	10.8041	8.8207	8.98836	8.35788	9.19978	9.10948	9.58546	9.7068	9.22717	10.1226	10.2	9.12314	8.36671	9.93329
RALGPS1	1.32e-17	7.65084	7.20272	7.16463	6.98382	8.04098	6.91919	7.86161	7.91264	7.30078	7.76726	7.98066	7.86479	7.24255	8.16076	8.54495	8.27925	7.31498	7.03245	7.15986	7.47909	7.81346	7.10219	6.55231	8.13996	8.65163	7.49058	8.07331	7.65382	7.52285	8.69527	7.53859	7.60638	8.06369	8.02095	8.31485	8.13186	7.41802	7.3891	7.8246	7.31566	7.56347	8.13509	7.63399	7.45886	7.96523	7.498	7.57855	7.60309
NT5DC2	1.34e-17	8.18889	8.04874	7.56794	9.4349	7.11754	8.53929	9.30572	9.76075	9.73811	8.43226	8.67422	9.00022	8.78618	6.77288	7.20059	6.95511	7.46952	8.74308	8.48868	9.83017	8.83338	8.55053	8.74278	8.99471	8.60799	9.01716	8.33563	9.32395	8.75317	8.47889	8.94918	9.3944	8.64611	8.97371	7.16736	7.81346	8.22567	7.32206	9.02049	7.7584	8.76223	8.2387	9.65735	7.54797	9.88758	7.94581	8.8129	7.81617
CDKN2D	1.35e-17	6.60421	5.97484	6.01401	6.95645	6.46648	6.53632	7.443	7.19907	6.01568	6.31384	6.40602	7.75705	5.76572	5.4824	7.47046	8.15659	6.60433	6.34043	6.01608	6.69173	6.62609	7.32016	6.46797	6.9285	6.74041	7.45292	7.307	6.5444	6.05977	6.4596	6.06718	7.1182	5.894	6.98366	8.43258	6.11355	6.61879	6.07142	6.97929	6.52746	7.18132	6.47701	6.65318	4.58971	6.09872	7.13583	5.97374	7.20579
TMEM191A	1.36e-17	4.29211	3.55722	5.5024	4.54962	3.82308	4.1393	3.80895	4.34274	4.13009	5.02419	3.99502	6.48976	3.72992	3.44135	6.78759	7.72763	4.38172	5.29203	4.39035	4.056	5.69066	4.95655	4.56045	4.3363	6.64271	4.00437	6.4941	3.54561	3.20054	4.13042	3.55514	3.92527	4.19117	4.31777	7.08176	4.31114	3.90542	4.1375	4.0058	4.13429	4.29613	4.36653	4.47114	6.60486	4.96273	5.83069	5.93201	4.49522
CPEB3	1.37e-17	7.89925	7.17896	8.34066	6.59468	7.73236	7.57553	6.09037	6.84673	6.75672	8.35132	8.19291	8.57007	5.78774	7.06298	8.63166	9.9029	7.33886	6.86651	6.89343	6.89274	7.05972	7.90013	5.76281	7.95923	7.28231	6.84294	9.0403	7.56322	7.59185	7.1856	6.94138	6.77548	7.51284	7.20526	9.64181	6.91964	7.37718	8.19189	6.6414	6.12878	7.58679	7.38265	6.44836	6.77199	7.04776	7.96953	6.67782	7.41842
MIR7-3HG	1.42e-17	5.87419	4.81146	6.15803	3.77527	6.11741	6.46917	3.76599	6.36496	3.97792	6.28076	7.00845	6.63324	5.44527	5.97529	7.67377	7.93684	5.93447	5.05546	6.07608	6.26374	5.80172	6.21409	6.21688	7.1812	7.20156	4.89247	7.25015	6.40746	6.37219	6.11133	5.30768	5.58873	5.99184	6.05498	8.41521	5.19222	5.80857	4.96448	5.45575	6.11429	6.30531	5.59676	5.50946	5.94898	4.89895	6.41991	6.14426	5.27635
C1orf115	1.47e-17	8.83565	7.45214	8.76052	7.44596	8.03896	8.67366	7.49123	5.42065	6.99205	8.99447	7.37376	10.1594	8.2925	7.79502	10.0537	11.3846	8.39499	7.63068	7.82589	7.48995	4.68192	8.5172	8.37764	8.33893	7.42395	7.53393	10.2358	8.34732	8.12171	6.81035	6.85327	5.13772	7.6959	8.60363	11.0802	7.81384	7.88267	8.81363	6.7817	7.14392	8.62637	6.55709	8.16015	8.21267	6.94658	8.27761	8.20097	7.75648
ARHGDIG	1.48e-17	8.93132	6.74829	8.37858	7.09449	8.3415	8.91031	7.59759	6.52967	7.36748	8.51618	9.17007	10.4134	6.84685	7.32647	9.65429	10.4134	7.79515	7.02435	7.64201	7.8064	7.91163	8.12813	7.43435	9.17575	7.57967	7.52648	9.81702	8.46983	8.36393	7.57267	7.47825	6.57244	7.86345	8.16502	10.6811	6.36374	7.09618	7.14021	7.17652	7.42274	8.29692	8.64142	6.66107	7.78854	8.43466	8.58155	6.91469	6.68633
EPB41L1	1.5e-17	10.0502	7.65128	9.87178	8.16296	9.97685	8.75484	7.83084	8.65907	8.36671	9.53099	9.34083	10.1637	8.66301	9.29209	10.0321	10.8903	8.58752	7.77842	8.53665	7.91306	8.45633	8.64582	7.8524	9.33195	8.55216	7.94167	10.0631	8.63904	8.56295	8.98707	8.469	8.20471	8.83392	9.31122	11.0635	8.73024	8.24105	8.53758	7.64473	8.59607	9.38073	8.62933	8.57007	9.02903	8.75702	8.82223	8.38661	8.25839
SLC6A17	1.52e-17	7.73447	5.34448	8.28649	7.35086	7.80025	8.75645	5.80103	7.31591	6.88277	7.88694	7.90415	9.18854	6.80125	6.81991	8.29148	10.1574	8.12297	6.61265	7.77309	7.33977	7.37068	7.54731	7.00965	8.20017	7.20338	7.76701	8.95652	8.16855	7.97585	7.23575	7.49638	7.35157	7.55753	8.15781	10.2523	6.98432	6.64536	6.82964	7.26075	7.37662	8.13583	6.85615	6.8799	7.90392	7.54899	7.87777	7.27919	7.31349
PRKCB	1.56e-17	10.1246	8.1752	9.79181	7.1154	8.70734	9.30231	7.0466	7.20091	8.48226	9.66241	8.68752	11.1169	7.93623	8.57333	10.412	11.9514	8.83536	7.85823	8.38409	7.46497	7.26394	8.88732	7.52827	9.63487	8.13947	7.9617	10.9966	8.80543	9.1648	7.13611	7.79142	7.00229	9.20586	9.72978	11.9062	7.43574	7.64291	7.44061	7.7859	7.74041	8.89709	8.86906	7.79953	8.11158	8.69013	9.13814	7.97219	7.84759
PAXIP1OS	1.61e-17	7.67217	8.21558	7.2483	8.04161	8.37553	8.61033	7.9265	7.46399	7.93026	7.36308	5.77391	8.08542	8.44382	7.88132	6.65255	6.70204	6.94966	7.59471	8.91209	8.18448	6.9101	7.86034	8.41563	7.33259	8.04176	8.28806	7.20132	7.82133	7.75309	8.57979	7.8089	7.52079	7.6167	8.23907	6.52376	6.95342	8.51125	7.58096	7.3619	8.28481	8.05034	5.55063	8.29299	8.57879	6.84176	7.87465	8.2138	8.2219
DLGAP5	1.66e-17	8.40448	8.85597	6.69787	9.45387	5.85477	8.82829	9.50118	9.34642	8.51365	7.7743	6.69301	8.46545	9.01921	6.55198	5.89037	6.90063	7.96702	8.76875	8.42744	9.01361	8.95317	8.70187	7.87091	9.15321	8.97224	9.42405	7.78868	9.89497	9.47156	8.4017	8.92406	9.44442	8.15416	9.0839	5.48994	8.21531	9.53676	6.81949	8.99459	9.02094	8.42222	8.01563	9.71521	7.28057	9.79441	7.06644	8.48687	6.28176
LMBRD2	1.7e-17	9.85969	9.20658	9.64677	8.93764	9.52556	9.9115	9.14035	9.90697	9.13335	9.11342	10.4439	10.1806	9.73074	9.55696	10.1726	10.9372	9.90516	9.63789	10.0674	8.62231	9.5083	10.0943	9.5197	9.8248	9.62238	9.60647	10.5464	9.58489	9.76142	8.78467	9.43847	9.44692	9.4056	9.65883	10.4852	10.0681	8.9502	8.71311	8.86504	9.23374	9.70251	9.62832	9.56138	9.69686	9.01361	10.0267	9.48758	9.33899
ZNF621	1.71e-17	8.85789	8.98332	8.79122	9.16584	8.99648	8.77398	9.15093	9.09222	9.19994	8.89657	9.10496	8.83647	9.05194	8.32539	8.66042	7.95598	8.80724	9.16652	9.01136	8.57504	8.86687	8.93764	8.92014	8.9413	9.30179	9.26851	8.66301	9.11084	8.9583	10.1598	9.10689	9.88361	9.19135	9.12439	8.16746	8.96821	9.17902	8.96561	9.47412	8.85001	9.37893	8.87619	9.38086	8.99663	8.51894	9.54404	8.92624	8.48252
APBA1	1.72e-17	9.24047	7.47182	8.56642	8.39559	8.52531	8.76875	8.26958	8.71981	8.31606	8.80658	8.70995	10.1672	7.63996	8.34066	9.41973	10.7437	8.31912	7.82222	7.97544	7.89938	8.52116	8.85172	7.2996	9.00504	8.4555	8.19936	9.41213	8.74918	8.852	7.90392	8.44178	7.52827	8.77815	8.99365	10.2321	8.12556	8.53805	7.02403	9.44307	7.99485	9.22399	9.05647	7.7389	7.15103	8.58973	8.36671	8.15781	6.96588
CLCN4	1.74e-17	8.52067	7.06135	9.36433	7.26202	9.60967	8.25315	7.48118	8.41213	6.8039	8.2405	7.8884	8.75726	7.30544	8.74169	9.23866	9.83998	8.56954	6.88605	7.443	7.43661	8.146	8.00484	7.36991	8.49624	8.28548	7.64933	8.94145	7.77547	8.68472	7.27877	6.52907	6.67704	8.0194	7.69815	9.73978	8.14704	7.07709	5.84896	6.81408	7.4294	8.37451	5.8816	7.85552	8.00434	7.80199	8.52259	6.59425	8.46034
UROS	1.82e-17	8.64597	8.44368	8.81847	8.19887	8.617	8.27134	8.21976	8.53653	8.14773	8.69808	9.2091	8.49938	8.13638	8.65558	9.18184	9.40193	8.40448	8.32192	8.53665	8.6382	7.64698	8.31289	8.01013	8.38891	8.05961	8.15224	8.99551	8.26727	8.28915	8.0118	8.71102	8.03728	8.86455	8.66301	9.33482	8.78512	8.8113	9.02706	7.42742	8.29944	8.07435	8.85656	8.20801	8.67003	8.82829	8.45815	8.31593	8.39731
OXCT1	1.84e-17	11.3167	10.5268	10.8081	10.8486	10.8903	10.9452	10.7836	10.7565	10.8435	10.3513	10.9276	11.6718	10.7317	10.5899	11.0648	11.6683	10.0854	10.8639	10.7465	10.6137	10.4285	10.8157	10.6593	10.9824	10.4337	10.7073	11.6757	10.9579	11.2269	10.4952	10.3532	10.7932	10.4699	10.8228	11.4182	10.8992	10.9478	10.0225	10.2172	11.0883	10.657	11.1759	11.1515	10.5513	10.9194	10.836	10.2794	10.8749
CA11	1.87e-17	11.0789	8.10866	10.3654	8.69488	9.33359	10.8665	8.16414	8.40723	9.3909	10.7841	9.63046	11.8167	8.67422	8.75165	11.3599	12.4826	10.5862	8.852	9.25871	9.45572	9.28086	9.92855	8.49915	11.3103	9.26758	9.04059	12.3957	10.3765	8.88232	8.88414	9.08957	9.32765	8.66199	10.9974	12.1588	9.43294	8.2691	9.08479	8.05335	9.76125	10.1594	8.3422	8.88906	10.5593	8.46996	10.3283	8.89112	9.67679
LOC285147	1.96e-17	8.41423	6.47368	8.81233	7.29128	8.26986	8.18606	7.81912	6.49639	7.2364	8.72844	7.61789	9.48835	6.77092	7.82589	9.1935	10.6704	7.46356	6.84685	7.62179	6.07235	7.2919	8.31161	6.56278	8.61129	7.50307	6.92838	9.96465	7.75212	8.18914	7.5302	7.65732	6.935	6.85063	8.34384	10.3972	7.87792	6.77889	8.21609	7.63385	7.59917	8.56709	8.48127	6.94982	7.14335	7.94581	8.49386	6.88195	6.91439
KIF14	2.05e-17	8.28029	8.85961	7.2381	9.63586	6.18763	8.30931	9.86747	9.94053	8.36254	7.54975	7.17151	9.16323	8.6324	7.46589	6.71394	5.45006	8.03088	8.82223	7.58786	7.41276	9.18085	9.16073	8.0879	8.44791	8.9958	8.94367	7.91333	9.22204	9.28799	9.6184	8.80019	10.154	9.10689	9.48413	6.62925	8.96363	9.80475	6.83043	9.46355	8.62466	8.59713	7.71204	8.88207	7.00866	9.74042	7.76599	8.45656	7.20258
CSRP2	2.09e-17	12.0165	12.0036	12.0425	12.0882	12.727	12.0844	12.3181	12.1187	12.5359	11.5064	11.8025	9.72732	11.6264	10.9404	10.3198	9.10455	12.8256	12.5195	12.7599	11.6445	10.4992	13.4293	12.6107	11.1936	11.8689	12.5683	10.8024	11.2246	12.3583	10.4722	10.7317	11.6253	13.4847	11.1531	10.5051	11.1044	12.1303	9.65413	11.7321	11.8734	12.5627	11.875	12.4084	13.8911	11.9867	12.4411	11.7031	12.217
HIVEP2	2.17e-17	9.23538	9.16031	9.33855	8.65297	8.86906	9.15561	8.59443	8.47759	8.00954	9.08601	8.7402	9.6329	9.36493	8.91182	9.32287	10.0356	9.61315	9.26691	9.18622	8.04046	8.54638	9.13242	9.14297	8.99711	8.79974	7.84023	9.82712	8.74133	8.19814	8.32945	8.55995	8.32852	9.09715	8.95963	10.5226	8.71981	9.00396	9.37679	8.83448	7.98136	9.34162	8.8724	7.95098	8.7718	7.95743	8.60222	8.9583	8.02604
HLA-B	2.18e-17	13.6644	14.3249	13.9088	14.0267	14.2117	13.4572	13.8291	13.4227	12.945	13.3872	13.444	13.787	14.0935	13.769	12.6107	11.5211	13.8823	13.9729	14.0935	14.3847	13.53	12.8911	13.9522	13.8039	12.9995	13.9934	13.4847	13.8911	13.2924	12.7989	13.8039	13.6082	13.2175	13.4847	11.4159	13.2924	13.6241	14.0267	13.9522	14.0393	13.2986	13.8455	13.8455	13.6896	13.6985	13.821	13.5	13.444
MAGEE1	2.24e-17	9.25713	8.07935	8.65796	7.81411	7.68827	8.62348	7.10185	8.07356	6.41101	9.1583	8.84947	9.77893	7.78573	7.48898	10.1864	11.3801	8.18245	7.55058	8.60114	6.63069	8.33101	7.78814	8.34089	9.04149	8.49497	6.90525	10.6003	9.37517	8.52766	8.98609	6.91615	8.97043	8.76571	9.60223	11.2979	7.26491	8.32561	8.53448	8.05998	6.57975	9.43734	8.83918	8.31657	8.64769	8.36958	8.96702	6.95717	8.18641
EPCAM	2.29e-17	6.37009	5.24741	6.8668	6.53054	6.51453	5.8524	6.11651	5.85477	6.01164	6.52921	6.48226	6.86202	3.48403	6.1652	7.06361	7.27329	6.03346	3.39726	4.54006	6.3063	5.97326	4.5417	6.25206	7.45304	7.28071	5.55191	6.84043	6.08838	6.3813	5.72583	5.50754	5.78956	6.23722	5.98613	6.84807	6.23568	6.56392	7.5702	6.07282	5.60522	6.80337	6.22387	6.44039	5.57654	5.87532	6.02457	5.96099	7.18445
SMIM17	2.32e-17	8.77341	8.45747	8.21989	8.46034	8.4465	8.30272	8.58942	8.27388	7.55529	8.35423	7.53508	8.89657	7.5205	8.02061	9.00051	9.83934	6.95511	7.65744	8.03818	7.86533	8.64664	8.31759	7.91563	8.16463	8.61019	7.61468	9.12899	8.65783	8.34511	9.12452	8.31404	8.77327	8.2922	8.17774	10.0167	8.4832	7.36839	7.62179	7.42205	8.15431	9.26444	8.59728	8.56954	6.24461	8.10985	8.06275	8.76511	8.49755
GOT1	2.37e-17	10.3456	8.86661	10.3046	8.87566	9.81737	9.54906	8.3981	8.95687	8.78416	10.0955	10.3949	10.8176	9.35856	9.64194	10.7012	12.1341	9.56826	8.95291	9.74102	9.17036	9.07997	10.037	9.50762	10.0166	8.82018	9.19978	11.1578	9.71505	9.70535	9.08872	7.00007	8.89554	9.76236	9.97405	11.9015	8.77273	9.33359	9.03838	8.5201	9.19135	9.37491	9.09061	9.09076	10.133	9.14297	9.92654	9.00885	9.8184
GNB2	2.38e-17	11.7294	11.884	11.0538	11.6195	10.9966	12.2151	11.4926	11.7888	12.8538	11.421	11.4992	11.5696	12.5166	11.2789	10.3683	10.7494	11.6611	11.7066	11.7043	12.6887	11.4958	11.8361	12.0687	11.6183	11.8152	12.299	11.1288	12.1324	11.6337	11.7888	11.842	11.4469	11.7375	12.299	10.9046	11.5281	12.229	11.5804	12.8412	12.3828	11.8066	11.5136	12.0076	11.804	12.2847	11.3103	11.8689	11.5376
MSI2	2.49e-17	10.2781	10.4104	10.0445	10.6445	9.98555	10.5484	10.7421	10.5021	11.2418	10.2407	10.453	11.2048	10.4638	10.3742	10.0232	9.57797	11.214	9.91196	10.2492	10.8105	10.6675	10.9283	10.679	9.97745	10.7006	10.5387	9.87011	10.0459	10.4745	11.111	10.9925	10.5166	10.3649	10.8853	9.64502	10.983	10.7018	9.80382	10.1684	10.3337	10.071	10.4943	10.6646	10.3434	9.8019	10.3576	10.2477	9.78817
HENMT1	2.5e-17	8.65324	8.30598	9.68107	7.45917	9.21152	8.42879	7.55796	7.42136	6.93529	8.94325	7.6136	8.93103	8.24491	8.95235	8.98429	9.73685	8.20746	8.70507	7.73488	7.32158	7.77492	7.95825	7.21963	8.50734	7.91848	7.9694	9.47466	8.04726	8.55671	7.54482	8.3977	7.65285	7.91563	8.31174	9.59074	8.03258	9.82984	8.26359	7.75563	8.30285	8.61942	7.97283	8.13093	8.25813	8.52558	8.83031	8.9533	9.27053
TTK	2.53e-17	8.71284	8.75023	6.34949	9.59344	5.86981	8.45009	9.41985	9.62881	7.23758	7.71582	7.39824	8.23208	8.35385	6.62146	6.54026	5.68865	8.29505	8.95776	7.74029	8.71284	8.95596	8.58489	7.67742	8.87903	9.44279	8.93282	7.93217	9.56067	8.49768	9.46974	8.28836	10.5273	8.91557	8.52766	6.18064	8.00446	9.13376	7.45789	9.11751	8.46609	8.22482	8.04947	8.89481	7.36338	9.45237	6.96408	8.68502	7.58185
DTYMK	2.62e-17	8.57264	9.06651	8.12971	8.97973	8.3716	8.97132	9.19513	9.49472	8.96105	8.40088	8.43338	8.97863	9.04225	8.59553	7.89499	7.54454	9.00221	8.94671	8.50201	9.05353	8.94379	9.16694	8.91568	8.91545	9.29182	9.27517	8.24105	8.94159	9.11084	8.80627	9.06035	9.11697	9.20778	8.89139	7.91238	8.927	9.23215	8.47916	9.4138	9.11751	9.0075	8.54793	9.1807	9.0826	9.34981	9.08072	9.16275	8.93177
WNT10B	2.63e-17	7.60908	5.60725	8.05584	5.41201	5.49197	5.45882	4.90097	6.04616	5.95569	7.55833	7.02805	7.97891	6.35131	5.06199	8.14307	9.8495	8.19361	4.5413	6.51437	4.65393	7.3034	7.48342	4.61676	7.57978	6.68706	7.14685	7.3546	6.99256	7.68693	7.35313	4.40243	5.573	6.0215	4.54842	9.79341	5.80857	4.6678	6.97395	4.63703	4.76953	6.98147	6.93191	5.62246	6.43118	7.23417	7.0809	4.80607	6.3506
FAM174B	2.64e-17	7.54199	7.65898	7.68045	7.31123	8.32103	7.66363	6.98447	7.40504	7.52104	7.80653	7.89599	7.86045	7.44785	7.49718	8.06653	8.60707	7.53888	7.82938	7.30031	7.47648	7.57881	7.59275	7.29163	7.62433	6.91919	7.43878	7.99202	7.49852	7.49058	6.66928	6.46133	7.38989	6.81035	7.89796	8.8381	7.49488	7.33544	8.81661	7.23446	7.32939	7.76612	7.31875	7.15103	7.65848	7.69265	7.5629	7.8366	7.20031
KIAA1644	2.67e-17	8.89684	6.14113	7.02089	6.00995	7.19948	7.70706	6.68531	6.3639	5.67416	8.23208	6.80023	9.20269	5.79284	6.33221	9.51541	10.2204	7.22174	6.36251	6.90156	6.46882	6.88143	6.9009	6.31432	8.35434	7.21128	6.06989	8.85975	7.43464	7.4623	6.32106	6.04713	6.81368	5.95281	7.15405	10.3949	6.49426	6.65318	6.55879	6.61098	6.45788	7.28826	6.70204	5.97374	6.981	7.25947	6.9714	6.48022	6.47817
AP4S1	2.67e-17	8.02734	8.14392	8.22384	8.17743	8.17544	8.21688	8.02774	7.16736	8.50889	8.21806	8.41666	8.38611	8.16229	7.54948	8.66935	9.21042	7.47702	7.46197	8.01415	8.32456	7.79833	8.35746	8.13426	8.45401	8.29839	8.28671	8.16323	8.11014	8.22025	7.35884	7.88063	7.54505	7.70527	7.4026	9.06788	7.90636	7.49108	7.86591	8.24235	8.11745	8.04442	8.53179	8.13816	7.59759	8.13653	7.98298	8.02905	8.54016
SMC4	2.7e-17	9.64998	10.0782	8.82803	10.8518	8.71441	9.9138	11.1161	10.8879	9.99035	9.32257	8.25014	10.417	9.93968	8.15781	7.77417	7.27135	9.56951	10.4613	9.40372	10.0177	9.68164	10.3755	9.88758	10.254	10.3773	10.2852	9.1575	10.4021	9.9689	10.3488	9.81156	10.7904	10.5588	10.2838	7.22788	9.74358	10.1564	10.3412	9.81686	10.1437	9.37033	9.38635	10.5665	8.9002	10.428	9.7035	9.72896	9.91057
LIN7B	2.82e-17	7.94443	7.34545	8.11314	8.4236	7.9313	8.5217	8.13358	7.96214	8.30411	8.3195	8.19413	8.43692	8.03582	8.07854	8.85503	9.38003	7.5567	6.82497	8.37972	8.74767	8.41083	8.33123	8.26154	8.34988	7.55136	8.11706	8.57587	8.02604	8.16995	8.51576	8.13983	8.24064	7.7634	7.42771	9.14129	7.92817	7.81647	7.29032	7.98964	8.21841	8.0645	8.63192	7.99779	8.07473	8.29692	8.21472	7.65494	8.6126
DLG2	2.83e-17	9.28493	6.48829	9.57622	7.09217	9.34692	8.40753	7.34024	7.14092	7.30435	8.9385	7.28293	9.48835	6.46572	7.98632	10.0876	11.0198	8.15107	6.22404	8.15224	6.78226	7.38656	7.53859	6.70146	8.85105	8.65531	6.63069	9.7744	7.74524	8.70747	5.29667	5.07985	5.48014	6.93775	8.01743	10.5731	6.82964	6.75383	5.90548	5.80208	6.40896	7.96473	7.03614	7.13733	7.12209	7.86479	8.28443	6.09812	5.23127
GPR6	2.86e-17	7.79451	6.88797	7.79289	7.36351	6.95211	7.30044	7.18049	6.81807	7.51485	7.41996	7.3464	7.33259	7.06719	7.06587	8.13886	8.61369	7.51888	7.40711	7.54221	7.40232	6.64734	7.55796	7.35858	7.63912	6.89888	7.36696	8.33893	7.47758	7.53274	7.69307	7.04826	6.70146	7.21268	7.2884	8.02801	7.27695	7.07405	7.52104	7.38847	6.9755	7.34767	7.37605	7.33692	7.41183	7.50307	7.57325	7.23237	6.87842
KCNJ3	2.88e-17	8.01548	5.5019	8.46766	6.66497	7.33756	7.68207	6.39874	7.47511	6.90018	7.96498	6.87024	9.1648	6.50964	8.32916	8.81341	10.287	7.54428	6.78484	7.84796	6.75437	7.787	6.97291	6.04486	7.98014	6.9631	6.54105	9.5331	7.58624	7.6838	6.54074	6.44204	6.85089	6.29425	7.92079	10.0326	6.8444	6.68496	6.25651	6.36071	6.34361	7.49829	7.11497	6.41052	6.95635	6.92768	7.55922	6.12569	6.29663
NECAP1	2.9e-17	10.9369	9.95223	10.3355	10.0331	9.87276	11.268	10.2395	10.3066	10.0927	10.6578	11.4582	11.076	10.2745	10.1907	11.3855	11.804	10.641	10.1935	10.9346	10.3732	10.6441	10.9464	10.4218	10.7815	10.7921	10.171	11.7093	10.3788	10.6262	9.7592	10.1617	10.0657	11.2484	10.5574	11.8631	10.6166	10.1028	9.39038	10.2001	9.85727	10.4258	10.5016	9.90574	10.0405	10.452	11.1611	10.2446	10.6306
RIMBP2	3e-17	8.52797	6.77153	7.75809	7.12785	7.08325	7.94493	6.52554	6.55446	6.65557	7.9963	7.45831	8.77719	7.29317	7.13245	8.5472	9.64677	7.13915	6.18687	7.61001	6.57292	8.10067	6.59083	6.73607	7.96875	6.92915	6.66233	8.75739	7.95531	7.20012	7.01086	7.18644	7.44137	7.64187	7.35086	9.66332	6.77332	6.8309	9.26704	7.79244	6.76724	7.58147	6.27957	7.45176	8.09306	7.04603	7.27146	6.85499	5.94898
CDCA7	3.12e-17	9.28416	8.83786	8.17758	10.5616	8.43922	10.5778	10.8337	10.1211	8.85456	8.37254	8.26568	9.80028	9.36203	8.81956	8.09647	7.39694	8.24621	9.54175	9.28493	9.6928	9.70123	8.85093	8.91077	9.83728	9.86817	9.48909	8.59805	10.1748	9.92715	8.57929	10.2986	10.1349	9.07151	9.88861	7.69935	9.57005	9.86678	8.18217	9.98023	9.50063	9.6208	9.09289	9.65692	7.85758	10.09	8.8472	9.18673	9.13349
SPRYD7	3.27e-17	7.79873	7.70053	8.34747	7.49094	8.08262	8.45066	7.66325	8.11902	8.10203	7.89599	8.38477	8.02552	7.92147	8.15262	8.51458	9.36408	7.7084	7.5112	8.04975	7.35617	7.79181	8.51837	8.45873	8.21016	7.91779	8.253	8.33217	8.01013	7.36027	7.49058	7.35981	7.99445	7.74065	8.18743	9.14333	8.0369	7.56335	7.95598	7.50168	8.02604	8.07743	7.85202	7.80467	8.71149	7.4808	7.4026	8.03204	7.28384
NEDD1	3.28e-17	9.84888	10.2035	9.77719	9.79073	9.55453	9.57848	10.2683	10.5479	9.49738	9.80446	8.9716	8.95789	10.1303	9.69974	8.75428	8.32496	9.74321	10.1072	9.75313	9.0937	9.78447	9.73373	10.0822	9.64856	9.38191	10.0431	9.14772	9.53187	9.82903	9.91334	10.0537	10.3567	10.1514	9.93968	8.37654	10.4294	9.70003	9.18817	10.7045	10.2615	9.71855	9.70282	10.2268	9.26223	9.85727	9.81088	9.87994	9.96359
ANK3	3.3e-17	9.58996	7.77524	10.2781	9.03787	10.3189	8.75673	9.15321	8.66343	7.62128	9.71972	8.94285	9.96758	7.80727	9.2091	10.6936	10.9966	8.81928	7.12813	8.49512	7.98245	8.74746	8.51176	7.58096	9.52609	9.70251	8.01802	10.2151	8.47837	9.36554	7.20118	7.44035	7.36748	8.88414	9.03325	11.2737	8.79396	8.50548	9.0684	7.97837	7.36826	9.12678	7.47156	8.16389	8.2392	7.73685	9.13726	7.96434	7.19338
ANO4	3.32e-17	7.73661	6.4596	7.89103	6.43136	8.63482	6.31415	5.9472	6.46272	6.18036	7.69763	7.18747	7.20132	6.05937	7.44501	8.51563	8.11771	7.0141	5.93395	6.91177	5.77351	7.48295	6.25184	6.40829	7.27741	7.43067	6.14113	7.77176	6.35588	7.85927	6.53715	6.52795	6.90018	7.60807	6.27776	8.81319	6.54141	6.53364	6.50702	7.09935	6.01685	7.42681	6.48794	6.89634	6.28907	6.52046	7.14189	6.31911	5.78478
SV2B	3.38e-17	9.25824	6.81439	9.18688	6.6985	8.5687	8.98484	6.54708	6.57087	6.36161	9.33281	5.9671	10.3853	6.33019	7.24472	10.0764	11.2527	8.72884	6.15896	8.63034	8.08084	6.65349	8.11695	8.46651	9.55486	7.08221	6.63702	10.5392	8.76258	8.76557	6.37945	6.6841	6.37648	6.80457	8.77554	11.7078	6.68706	6.14728	6.76359	6.54242	7.02226	8.85568	6.767	6.3684	8.20801	6.50964	8.927	6.3145	6.26848
CLEC5A	3.49e-17	8.32481	9.01222	7.73636	7.10644	9.01716	8.39731	7.11034	8.11144	8.695	8.66105	6.95595	7.36121	9.61943	6.93936	5.77532	5.7697	9.28609	8.81341	9.04651	7.71248	8.57491	8.97507	9.29124	7.83576	8.35759	8.94805	6.77153	8.38268	7.34752	8.30987	7.74209	7.02517	7.81346	8.60668	4.70879	8.7537	8.73918	5.88789	8.5019	10.0601	9.22053	6.29425	7.78602	9.37006	6.11355	6.99219	8.80045	8.98888
MICU3	3.49e-17	10.1452	8.48674	10.5655	8.84484	9.90733	9.73741	8.9753	9.24158	8.98559	10.5745	9.8324	10.2519	9.0602	9.48095	10.6953	11.8106	9.44615	8.6214	9.44483	7.98162	9.45298	9.60778	9.40943	10.0036	9.74863	9.09497	11.154	9.79967	9.83872	9.64942	8.26202	9.0806	9.7561	9.55192	11.6017	8.42976	8.57667	8.45694	9.37065	6.84054	10.0137	9.93192	9.35181	8.79934	9.53483	9.91229	9.3898	8.50889
KLC1	3.56e-17	10.9565	10.6707	10.9586	10.5438	10.842	10.8234	10.6844	9.85969	11.0654	11.0703	10.5306	11.6634	9.63551	10.6757	11.3258	11.8494	10.1211	9.73895	10.4878	10.5626	11.1919	10.9959	10.6549	11.1454	10.9425	10.8909	11.4292	10.7322	10.5324	10.4443	10.2898	9.76556	11.3316	10.1849	11.8053	10.3102	10.1861	10.0416	11.0546	10.5007	10.8415	10.3484	10.8047	9.9443	10.3329	10.2271	10.6947	10.0239
CASP6	3.58e-17	9.00697	8.78673	8.00484	9.28332	8.53563	8.58034	9.43366	8.84901	8.67448	8.73213	7.30741	7.50347	8.84243	8.74905	7.79168	6.2932	8.54977	8.67765	8.79354	9.51769	8.66857	8.65392	9.13405	8.73676	8.37362	8.78086	8.86605	8.8899	8.50231	9.09971	8.82545	8.84545	8.02095	9.63162	7.05625	8.75673	9.88329	9.44077	8.74542	9.31994	9.08311	8.83448	8.93217	8.92624	8.22521	8.56905	8.89193	8.94182
C6orf136	3.61e-17	10.3119	9.07141	9.96359	9.33228	9.82124	9.69008	9.68478	9.69565	9.5395	9.89254	10.0137	10.3994	9.38727	10.1633	10.487	10.8397	9.7044	9.45008	9.80647	9.5856	9.31907	10.0559	9.38898	9.84753	9.84821	9.46526	10.4196	9.70003	9.70221	10.4116	9.16247	9.9115	10.1043	9.40009	10.9537	8.95488	9.44541	9.51625	9.84753	9.40862	9.97988	9.76556	9.60938	9.02748	10.0499	9.35532	9.08601	10.2507
SYN2	3.78e-17	10.1193	7.23004	8.44219	7.28103	8.23317	9.98663	6.93164	7.1051	7.47207	9.48555	8.20614	10.6316	7.3371	7.81064	10.179	11.6445	9.3122	7.23312	8.76746	7.64291	7.4485	8.68826	7.48265	10.1961	7.82156	7.01797	11.0292	9.14391	9.03193	7.46647	7.9394	7.25276	8.51228	9.11867	11.3724	6.74623	7.72001	6.76607	7.39005	7.32791	9.17823	7.23494	7.50954	8.36339	7.30394	9.49257	7.57881	6.87109
PPIB	3.81e-17	12.225	13.0692	12.141	12.8538	12.0998	11.695	12.9316	12.3559	12.7642	12.6755	12.6573	12.0636	13.0083	12.1324	11.8199	10.8038	12.0354	13.0329	11.756	12.9898	11.3767	12.7552	12.7913	11.9456	11.3231	12.6107	12.3686	12.5871	12.3637	12.6296	12.5502	11.9564	12.4529	12.6001	11.0508	12.5359	12.2577	12.3909	12.3341	12.6107	12.6035	12.2427	12.8911	12.8538	12.5778	12.542	12.9237	11.8245
FN1	3.87e-17	12.3465	13.2281	13.1191	12.434	12.9723	13.3804	12.1875	12.1588	12.6429	13.2409	11.057	10.1322	13.2474	11.365	10.5438	9.38108	13.5073	13.444	13.2117	12.8824	12.6429	11.903	13.2117	12.6679	12.9197	13.4372	13.3239	12.896	13.089	12.2004	13.0432	13.064	11.3931	12.7832	9.53497	12.5967	13.1782	13.7288	12.0924	13.0591	13.3475	13.157	12.654	13.2058	11.8716	11.5293	13.7372	12.2688
IDH1	3.93e-17	11.0967	11.8539	11.1961	10.8052	11.089	11.5791	11.3385	11.7466	11.9122	11.0163	10.9412	10.3671	12.0882	10.8337	10.5145	9.53469	11.2534	11.2474	11.2401	11.0163	11.486	11.616	11.234	10.9458	12.0317	11.5933	11.0641	10.7811	12.1933	10.3143	11.4707	10.5504	11.1806	10.9992	9.28814	11.4615	11.857	10.1668	11.6445	12.0703	10.9471	11.0356	11.6671	11.5247	11.5933	11.7294	11.2291	10.8914
CXCR4	4.05e-17	11.0563	12.1548	11.9345	12.0148	11.1501	10.7068	11.8645	10.3026	10.7915	11.2997	9.88662	10.1344	11.3706	11.565	10.0123	9.03866	11.3194	11.1783	10.3949	11.0304	11.2172	10.3464	11.3571	10.3347	10.5815	11.4228	11.4805	10.6893	10.1942	10.2636	10.7666	10.4511	9.27681	11.2148	9.1648	11.4717	12.7404	10.8816	11.6136	10.7465	11.3049	9.63702	11.0682	11.0059	10.083	9.47466	11.673	11.893
BOC	4.09e-17	9.34218	9.19978	8.0063	9.24074	8.63205	9.28057	9.41871	8.59225	8.78115	9.22263	10.1007	9.14858	9.69538	8.85758	8.64821	8.36418	9.26223	9.35782	10.0573	9.83934	9.13432	8.74006	9.95769	8.8536	8.04726	8.93575	8.85037	9.05353	8.99301	10.3098	9.20063	8.38726	7.77547	9.65261	8.34113	8.9051	9.88291	10.7371	8.08009	8.999	9.38727	8.71794	8.65046	9.7633	10.2216	9.66514	9.40987	9.78817
NUP205	4.22e-17	8.91633	9.08792	8.67943	9.48292	8.90662	9.63113	9.6019	9.25053	9.78378	9.1319	9.10282	9.20463	9.89021	9.16114	8.77067	8.32456	9.26184	9.54809	9.70082	9.49487	9.37531	9.4832	9.47156	9.84821	9.83274	9.85483	8.76774	9.63702	9.75377	10.116	9.74956	9.76909	9.32712	9.95563	7.89541	10.0778	10.5538	8.82915	9.78204	10.0474	9.47652	9.74924	9.66771	9.44806	10.1429	9.74292	9.48292	9.73041
GRM1	4.29e-17	7.25302	5.55163	6.11151	5.72197	7.06705	6.59833	6.02109	5.99478	5.49372	6.46416	6.32758	7.39252	6.62811	6.42968	7.22613	8.46359	6.75933	6.49155	6.92891	6.02905	5.47338	6.21792	5.93132	6.8534	6.43932	6.43679	7.91185	5.7149	6.7386	6.0215	5.13772	5.50695	6.60084	5.14112	8.13764	6.40965	5.95115	5.99686	6.09849	6.88448	6.9904	7.13021	5.75532	6.4701	6.62162	6.97666	5.81137	6.81472
CLEC2L	4.49e-17	7.92171	6.93147	8.18949	6.60563	7.22692	6.94167	7.1639	5.98701	7.60167	7.61531	6.87539	8.53719	7.46985	7.44061	8.26225	9.58625	7.59261	6.54838	7.12691	6.61688	6.19483	7.24995	6.43455	7.64735	5.89549	7.64981	8.96496	7.8246	7.33474	7.1862	7.67995	5.10096	7.3464	8.14573	9.3895	5.02809	6.72706	7.16775	6.84685	7.4197	7.31528	7.20166	7.28718	7.40483	6.67144	8.09973	4.75648	6.88221
RAB40B	4.54e-17	9.77828	7.97269	10.5632	7.52079	11.3608	8.16252	7.68525	8.45607	7.44698	10.0327	8.30245	9.98023	7.24937	9.36367	10.7952	10.5344	9.11982	7.85334	8.469	7.32659	9.33138	8.36364	8.25647	9.80578	9.59372	7.56599	9.61828	7.85848	9.84513	7.87792	7.94907	7.9651	8.24739	8.61087	11.1432	8.43141	7.36639	9.3784	7.82589	7.1254	9.91169	8.12496	8.89843	8.55742	9.30572	9.7489	7.42025	7.88118
TRAM1	4.57e-17	11.2688	11.8093	11.3983	11.8274	11.4805	11.7361	11.652	11.6433	11.728	11.2779	11.1676	10.3301	11.8659	11.214	10.5564	10.3581	11.6634	11.8885	11.744	11.3456	11.5743	11.292	11.9917	11.2869	11.1686	11.6044	11.2745	11.4228	11.3894	10.8228	11.1104	11.5497	11.3562	10.9175	10.3451	11.3846	11.1218	11.2308	11.3103	11.9834	11.3962	11.2671	11.498	11.3514	10.9258	11.314	12.2109	11.7998
S100A6	4.65e-17	12.5935	13.0839	11.9917	11.6671	11.804	10.9953	11.6623	11.4582	12.2893	11.585	11.5355	11.623	12.3181	11.1147	10.5238	9.69482	12.2647	12.2229	12.705	12.5599	12.2965	11.9711	12.6429	13.2117	10.9742	12.9	11.073	12.6789	12.9402	13.2175	9.39829	12.8656	12.3417	11.3167	9.61059	12.3929	12.1548	13.064	12.8495	12.1467	12.896	13.4924	11.8974	13.4698	13.2175	13.0484	11.4654	13.3239
GPX7	4.73e-17	8.80529	9.67425	8.88598	9.92553	8.50889	8.67422	9.73623	10.3649	9.45969	9.09749	8.23266	9.10257	9.63457	8.59607	7.55543	8.5172	9.24538	9.43914	9.10269	10.0807	9.2631	9.25496	10.2271	9.13814	9.38651	9.28744	9.24653	9.24895	9.35767	9.57528	9.27601	9.8161	9.62679	9.54141	8.2922	9.31277	9.23185	9.48701	9.76745	9.81251	8.77966	9.5449	9.87835	9.76714	9.55037	9.39997	9.75792	9.50498
HIST1H4J	4.75e-17	6.31676	9.8919	5.02757	8.39294	8.06383	9.02512	8.18889	8.28751	8.1911	7.60462	5.01374	6.26806	9.43902	8.09552	7.12613	5.08605	8.77452	7.73317	9.96011	7.7338	9.09522	8.5257	8.23177	8.78537	8.64769	7.92552	6.56464	8.43964	8.13401	7.57179	7.27257	9.67173	6.08279	7.77479	5.00715	8.7557	6.61013	10.2707	7.47443	9.45696	8.79162	7.63698	8.5472	9.62424	7.80379	6.08297	8.31214	5.39267
2020-03-11	4.79e-17	6.12547	6.68979	6.49033	4.25155	5.98877	4.57803	4.09484	4.31028	4.54278	6.53294	4.26895	7.5155	4.14782	3.86297	7.48842	7.87132	4.3004	6.19587	4.32326	4.12728	5.46543	6.47798	7.00764	4.42723	3.88179	3.71931	7.62243	5.55717	3.89374	5.62154	4.87041	4.34835	6.74782	3.82193	8.39717	3.78577	4.25072	4.49293	4.2098	4.2747	4.53819	3.8193	4.27951	3.99829	5.41773	6.78578	5.69819	4.64886
SGTB	4.92e-17	9.5839	9.4733	9.93192	8.33325	9.4369	9.09749	8.78145	9.22782	8.72218	9.95727	9.67826	10.0725	9.29265	9.24721	10.1802	10.7618	9.25799	9.06334	9.19323	8.56217	9.51456	9.81702	9.47048	9.56713	8.9583	9.49442	10.3046	9.44541	9.4316	9.33169	8.63934	9.16169	9.91394	9.02382	10.8834	9.66696	7.89599	8.34433	8.755	8.93486	9.39497	9.68598	9.10605	9.11443	9.34471	9.60997	8.68319	8.67204
STOML1	5.12e-17	9.11001	8.33624	8.85813	7.8805	8.98836	8.65499	7.86696	8.38636	8.13426	8.9824	9.04838	9.03539	8.87395	8.89193	9.30965	9.85193	9.17007	8.89609	9.22022	9.40021	8.30451	8.61369	8.70828	8.95126	8.36935	8.95699	9.16584	8.48164	8.56669	9.24341	8.24226	7.98312	9.1888	8.85489	9.85509	8.41174	8.67872	8.26225	8.43748	8.74845	8.87749	8.63495	8.81043	9.28003	8.86374	8.94219	8.69558	8.98347
LINC00294	5.13e-17	10.5959	9.26918	10.2607	10.5993	10.4041	9.9115	11.0752	10.1053	9.50326	10.2442	10.6439	10.5852	9.20269	9.82349	11.3194	11.6573	9.87484	9.34614	9.85704	10.1617	10.0638	10.3131	9.44749	10.327	9.46717	9.32451	10.7915	9.70411	10.3691	10.2178	9.9451	9.11219	10.0793	10.0819	11.3514	9.66032	10.2872	9.28372	9.8495	10.0634	10.239	10.2835	9.47928	10.0577	9.83205	10.2225	9.69008	9.8899
RAP1GDS1	5.21e-17	10.0861	9.4873	10.9892	9.53807	10.5284	9.86035	9.80398	9.99489	10.0113	10.1403	9.73811	10.0659	9.69974	9.82744	10.4129	10.7612	10.2662	10.0974	9.59828	9.21812	9.98125	10.42	9.68687	10.2636	9.75677	10.1574	10.3998	9.78416	10.2433	8.53771	9.12127	9.31625	9.17984	9.91394	10.8543	9.54128	9.29018	9.1034	9.34501	9.82874	9.77719	9.63586	9.7981	9.81269	9.74606	9.95656	9.54865	9.16584
SEPN1	5.38e-17	11.0952	11.7714	10.7975	11.3786	10.3062	10.1969	10.9452	11.4253	11.2466	10.6834	11.2696	10.3963	11.1893	11.2834	9.74441	9.37295	11.021	11.4511	10.651	11.2212	10.2698	11.1578	10.8934	10.7504	10.6252	11.7688	10.4157	11.2466	10.2189	11.7375	10.8239	10.7333	11.5509	10.3037	9.44279	11.5933	11.6508	10.3182	11.3084	11.6757	11.1185	11.6433	11.8081	11.2474	11.7241	10.8318	10.211	12.1207
MDH1	5.42e-17	12.626	12.0336	12.7082	11.893	12.2427	12.5717	12.115	12.3755	11.7952	12.4826	12.3659	13.2409	11.9743	11.9883	12.9275	13.8568	12.81	12.2334	12.4611	11.5225	12.1247	12.5656	11.9499	12.8211	11.9427	12.2131	13.4698	12.6165	12.7116	10.6046	11.5247	11.9934	12.0998	12.7682	13.821	12.0924	12.3302	11.941	12.3321	12.0863	12.3252	12.5809	12.1228	12.5599	12.6391	12.4499	12.0618	12.654
ARHGEF6	5.62e-17	11.2943	11.7952	11.0723	11.138	10.9836	10.686	11.2962	10.6418	11.3733	11.4643	11.8274	11.8199	11.6445	11.8885	11.3846	10.0613	10.7296	11.1806	11.0875	11.2155	10.6405	11.9008	11.9763	11.2474	11.5731	11.3103	10.7975	11.0914	11.5077	12.3736	11.3067	11.5041	11.256	11.2542	10.2063	12.0425	11.3865	10.9592	11.8702	11.3223	11.157	11.884	11.3715	11.2065	11.7546	11.5862	10.8099	10.3085
NUAK1	6.11e-17	11.1169	8.90727	11.565	9.72544	11.3724	10.4342	9.38468	9.3592	8.84615	11.4236	8.77768	12.0863	9.09749	10.3347	11.7645	12.3806	10.3687	9.92654	10.005	9.44047	10.5964	10.6543	10.2325	10.8415	10.4157	9.04947	11.9188	10.0022	10.5934	8.93243	9.54235	9.01288	10.412	10.5401	12.5967	9.5237	10.4506	9.86152	10.6694	9.42668	10.6838	9.19513	10.176	10.4144	10.3089	10.4534	9.48169	10.1101
KCNC4	6.17e-17	8.03512	7.06477	7.78306	7.9021	7.22899	7.90998	7.51648	7.29627	7.41243	7.7329	7.63327	8.26874	7.8864	7.38119	7.94167	8.9002	7.74041	7.80693	7.41211	7.69053	7.32734	7.74867	7.44021	7.54282	7.49021	7.22562	7.84475	7.78868	7.41475	8.04632	7.91319	7.71867	7.58415	7.58693	8.65403	7.87355	7.69643	7.79901	7.82987	7.79515	7.34697	7.0347	7.69082	7.6795	7.23075	7.52769	7.91163	7.93819
MAPK8IP3	6.34e-17	7.87303	7.67712	8.38844	8.26154	8.54694	7.69135	8.15262	7.63912	7.6079	7.94957	8.55254	8.92014	8.37123	7.87105	8.84347	9.30208	7.51661	7.32489	8.03113	8.06859	7.71204	8.38206	8.0725	7.89899	8.23457	7.3559	8.5693	8.09602	7.82385	8.80431	8.34192	7.92327	8.68472	7.90344	9.79117	7.8246	7.9928	7.65168	7.82653	7.9698	8.36723	8.29866	7.82709	8.12874	8.22582	8.07597	8.14787	8.10176
HPCAL4	6.4e-17	9.48201	6.79563	8.02061	6.2173	7.9928	8.94615	6.46978	7.41915	6.3667	8.60707	7.12041	10.0577	6.28056	7.76418	10.1082	11.4544	8.42145	5.68916	8.14628	7.38618	6.45632	9.04225	7.10106	9.02536	8.70399	6.82799	10.4622	8.63866	8.20905	6.49012	6.86093	6.99476	8.1798	8.54089	11.0129	7.6317	6.82198	8.61142	6.91862	7.1033	7.86639	6.75203	7.08896	7.27097	6.81439	8.53966	6.48745	7.3503
CKAP4	6.45e-17	9.9146	10.5894	10.0889	10.7129	9.83833	10.403	10.686	10.5494	10.5113	9.71674	10.2023	9.87729	10.5786	9.96538	9.43646	9.2577	10.5448	10.7594	9.71161	10.7693	9.94949	9.97372	10.729	10.2143	10.1392	11.0115	10.7195	9.96822	9.74795	9.84566	10.7404	10.3385	10.3563	11.0648	9.81419	10.1219	10.6745	10.448	10.7677	10.3563	10.3862	10.5264	10.6565	11.947	10.3919	9.95769	10.7404	10.0966
GPR161	6.46e-17	7.80025	7.45401	7.69337	8.7627	7.68286	8.30609	8.59481	8.89609	8.19436	7.63556	8.48522	8.57203	8.29944	8.20587	8.20069	7.45401	7.12528	7.80253	7.40299	8.54128	8.08927	8.04442	8.28521	8.28836	9.18344	8.60261	7.94622	8.33747	8.32427	8.59495	8.83265	7.95772	8.30125	8.64339	6.91533	7.98578	8.42066	8.45788	8.96445	7.96141	8.10903	8.6201	8.4465	8.33694	8.55106	8.00045	7.81991	7.74383
KIAA0040	6.5e-17	8.55904	9.19406	8.40435	8.06038	8.25765	9.62223	8.23949	8.41588	9.20463	8.7442	7.4857	7.80391	9.96565	8.6821	7.16427	6.2347	8.46517	9.21897	7.92196	9.46933	8.38138	9.01627	9.7676	9.19159	8.59744	9.84916	7.57804	8.46301	8.87683	7.57684	7.86987	8.82605	8.64192	7.58018	7.12394	9.297	8.50681	8.48818	9.95442	9.13628	8.96509	8.16552	9.49563	10.0459	8.80086	8.68156	8.94474	9.10948
TRIP6	6.62e-17	10.9611	11.2688	10.3946	10.8668	10.7952	11.4635	10.8058	10.3954	12.0408	10.8367	8.51604	10.5479	11.9779	11.4605	9.48499	8.93331	11.0066	11.125	12.0058	11.2039	10.2395	11.6757	11.756	10.6834	10.1352	11.4292	10.3576	11.3076	11.0458	11.1272	10.7142	9.9207	9.11894	11.2164	9.38355	11.0393	11.5743	10.8378	11.6044	11.8584	11.01	9.22909	11.648	11.9377	9.60617	10.2723	11.4321	11.9157
RP11-215H22.1	6.79e-17	7.88761	6.15199	7.40857	7.43227	6.96701	7.15935	6.7833	6.95481	7.07266	7.97927	7.75474	8.56954	6.0665	6.91411	8.10203	9.37208	4.93734	6.62279	7.47346	6.36886	6.43218	7.16685	6.07776	7.8864	7.26284	7.14065	8.82335	7.48912	7.64488	4.46758	8.12171	7.36491	7.3275	7.39029	9.47018	7.22073	5.88244	5.17796	7.13233	6.90668	6.32553	7.56843	5.76102	6.74843	4.99758	7.60179	7.15769	5.93181
PITPNM3	6.92e-17	8.66213	7.00155	7.90715	6.96141	7.5591	7.47346	7.13703	6.89274	6.39406	8.20414	7.1383	9.2357	6.9558	6.94053	9.17174	10.2747	7.45844	6.37929	7.43039	7.39215	6.80783	7.71126	7.57723	8.0557	6.93238	6.68756	8.91869	7.90809	7.4501	6.67825	6.55301	7.03625	9.01222	7.7685	10.179	7.14162	7.47032	6.61194	6.50016	7.60506	7.61151	7.41955	7.12894	6.88515	7.82234	8.01139	6.21202	6.17778
GRM2	7e-17	7.38488	4.74353	6.37534	5.3389	6.57519	5.88682	6.24409	6.3786	4.83585	6.61211	6.50561	7.72576	6.16575	5.64803	6.69908	7.94245	6.61295	5.37566	5.37628	6.64587	6.85314	6.26098	5.27475	5.86249	6.8119	4.99149	6.86698	7.10524	5.11436	6.36054	7.25717	5.4112	6.48728	6.56371	8.42623	5.6844	5.82744	5.32347	4.64763	5.31842	7.56205	6.78745	6.39548	5.69125	5.3836	6.65105	5.83763	6.17778
RUNDC3B	7.2e-17	9.03927	7.77699	9.41555	8.3396	8.6889	8.89516	8.32206	6.36175	7.14259	9.57005	9.00667	9.8063	7.93026	8.64142	9.52494	10.6549	8.2121	7.91224	8.06038	7.75511	7.10068	9.29456	6.6433	8.80327	8.19841	7.51497	9.88529	8.13198	8.22521	7.62278	6.9994	7.55984	8.41449	8.60414	10.4017	7.83552	8.55509	9.02049	7.13097	7.43755	8.71605	8.65488	8.50126	9.03852	8.00434	8.50889	8.07123	8.15183
PPIC	7.44e-17	9.30208	9.47466	9.02955	11.0107	8.85289	9.82498	10.7811	9.99098	9.68107	9.48864	8.80098	9.19243	10.1834	10.2212	7.52732	7.0681	10.7142	10.8668	9.9312	9.90796	8.46819	9.60223	9.62516	9.25633	8.62559	9.91701	9.5878	9.66081	8.94448	9.79772	8.9385	9.78512	8.29289	10.4439	7.67275	9.93621	11.261	11.1919	8.4175	10.1558	9.07461	9.46121	10.2898	9.99863	8.47068	9.87041	10.355	10.4793
LOC100288911	7.56e-17	7.90392	7.68801	7.67426	7.32307	7.19109	7.84475	8.03765	7.38224	8.76223	8.31872	7.34444	8.42744	7.48295	8.26202	9.34391	9.28702	7.88103	8.01682	7.53888	7.96128	6.06718	8.695	8.12185	7.53393	8.43748	7.43545	9.09772	6.53663	7.52569	6.95511	7.45917	6.24316	8.47916	8.28893	9.11125	8.09087	7.08221	8.58663	7.49964	8.34598	7.83945	8.0223	8.6276	8.93575	8.51684	7.84388	6.91309	8.0074
SCAMP5	7.63e-17	9.33497	9.09749	9.20047	9.08518	9.11624	9.21406	8.90378	9.32287	8.95317	9.33914	10.2035	10.1935	8.54385	9.4242	10.1061	10.3853	9.62832	8.93445	9.15621	9.11839	9.05778	10.0394	8.56656	9.19295	8.79108	9.00968	10.3215	9.42192	9.06192	8.69981	9.76203	8.85277	9.99702	9.96088	10.9124	9.25295	8.89088	8.11771	8.999	8.74344	9.65174	9.5999	8.87476	9.45462	9.07555	9.85259	9.37065	9.40315
ATP6V1G2	7.64e-17	10.4736	9.30721	10.5489	8.802	9.92619	10.4227	8.69699	9.40586	9.56383	10.4878	11.9531	11.585	8.56996	8.92826	11.449	12.6719	10.1303	7.95784	9.83222	9.23839	10.161	10.044	9.89005	10.6003	9.22204	9.00682	11.958	10.7023	9.74831	8.72324	9.09385	9.3354	9.72309	9.24609	12.3202	8.56428	8.2188	8.42744	8.39548	8.56217	9.63356	10.8742	9.48879	9.519	9.73623	9.82903	8.89492	8.39472
SYDE1	7.67e-17	8.60414	9.07438	8.83031	9.24357	8.82938	9.1011	9.01234	8.57186	9.63194	8.74063	8.13509	8.04386	9.29371	8.76015	7.80478	7.56651	9.1319	9.12651	9.73526	9.70771	8.30258	8.67448	9.43238	8.84642	8.29789	9.62621	8.40228	8.93256	8.63961	9.23125	9.29615	8.7272	8.87953	8.9995	8.30026	8.86746	9.37251	9.72277	9.62178	9.39899	9.29359	9.10311	9.35371	9.00871	8.96267	8.69527	9.44019	9.36449
STXBP6	7.78e-17	8.65351	6.15581	8.95501	6.60666	9.05235	7.48067	5.90932	6.407	6.12432	8.87333	7.37825	8.73755	5.77134	8.13156	9.57565	10.318	7.50017	6.09294	7.2541	5.85217	7.55464	7.67849	6.76827	8.29099	7.40906	6.36147	9.48292	7.76556	7.9536	6.75143	7.35617	6.14769	6.57361	7.36418	9.61704	6.42115	6.09723	10.4573	5.93772	6.17079	8.5455	5.96848	6.22139	6.11904	7.37866	7.70594	5.74227	6.03145
PART1	7.89e-17	7.95266	6.59738	7.31781	7.19852	6.68803	6.91209	6.45496	6.95936	7.45292	7.56374	6.23228	8.09437	7.49501	6.9101	7.6802	8.94863	7.18022	7.32056	6.45322	6.70439	6.45322	6.95511	6.95396	7.45801	6.63194	7.08076	8.11266	6.9591	7.07606	7.15477	6.77199	7.01844	6.78886	7.3057	8.86107	6.64316	6.72795	6.60915	7.34067	6.82424	6.4832	7.21754	6.92978	6.68085	7.21806	7.26479	7.01998	6.79406
YBX3	7.94e-17	10.7189	11.6299	10.4802	10.5429	10.3066	10.7114	10.7654	10.3174	10.8705	11.0458	9.91701	8.95527	11.1426	10.4924	8.95652	7.68758	11.5817	11.5719	10.428	11.5187	10.8639	9.59946	11.8631	10.4434	10.018	11.3992	10.571	10.6686	10.3278	11.4246	10.4511	11.8645	11.0451	9.74606	8.02243	11.1669	11.1531	12.5778	10.9605	10.7475	10.5353	10.1377	10.5852	10.5616	11.01	10.9953	11.6993	10.6441
SYT13	8.15e-17	9.59269	7.77949	9.30808	8.25474	8.63406	9.58061	7.48381	8.86979	7.58018	9.59284	8.71658	11.141	7.93409	8.19136	10.2437	11.786	8.90481	7.68563	8.54782	8.28495	9.10742	8.63365	8.00807	9.72213	8.64475	7.85809	10.9372	9.0826	8.53551	7.67894	8.41914	7.98788	9.90555	9.68285	11.2586	7.26787	8.32731	8.4447	7.99445	7.90899	8.84305	7.82766	7.76024	8.56669	7.27946	9.05169	8.00128	7.43421
NAV3	8.16e-17	8.85145	7.01339	8.93818	6.84346	8.53941	8.75881	6.75143	8.3701	6.72887	8.62179	6.57292	8.58166	7.55683	9.80055	9.24473	9.7388	7.64322	7.96726	6.96384	6.19712	7.91052	8.82724	7.32291	7.79083	7.77256	6.82345	8.63999	7.39611	8.34931	7.28192	7.78519	7.43728	10.1849	7.61517	9.80752	8.37039	7.35058	6.47044	7.22355	6.52149	8.37986	7.18986	7.33109	7.53274	7.26006	9.41298	7.17262	5.92702
GALNTL5	8.17e-17	3.79395	4.56664	3.75727	3.66153	5.35202	5.50695	4.72878	3.26235	3.68963	5.92556	2.40163	2.66691	3.27808	1.94467	6.07796	7.43716	3.95443	4.82478	3.23404	2.67615	3.75824	4.14814	3.41607	5.92364	3.3247	3.35196	6.72033	3.92216	5.22012	3.58928	4.7728	3.67061	3.42278	4.83341	6.35971	2.52277	3.53332	5.17162	3.56281	4.97985	3.74528	5.0938	3.60324	3.39005	6.00579	6.07206	2.92723	3.37219
ANTXR2	8.51e-17	7.99992	7.76863	7.92952	8.47282	7.99941	9.02487	8.3739	8.72413	8.38356	8.26624	7.12567	7.44811	8.45843	9.0983	7.34102	6.78226	8.48489	9.70381	8.71875	7.58519	8.23266	7.5629	9.14537	7.93623	8.001	7.86503	8.44354	7.62256	7.65181	7.71747	9.093	8.29299	7.39752	9.09249	7.01175	9.00504	8.0525	8.95088	8.2219	9.12088	8.15913	8.90793	8.05625	9.18429	8.10804	9.00262	9.09957	9.30468
RPS5	8.56e-17	12.9631	13.769	13.1039	13.8911	12.8301	13.9934	13.8387	13.4161	14.1472	13.157	13.0432	13.2579	13.4227	13.1191	12.6922	12.81	13.1139	13.2226	13.4227	14.132	13.2474	13.4847	13.7603	13.2634	13.157	13.2058	12.626	13.9729	13.275	13.3353	13.8387	13.2924	12.1531	13.2808	12.3713	13.7372	13.1724	13.6082	12.9995	13.5524	13.769	13.3475	14.0659	12.8034	13.769	13.3872	14.1472	13.4021
GHITM	8.67e-17	11.4442	11.0928	11.4926	10.6092	11.0578	11.4572	10.6231	11.0422	10.6794	11.0967	12.094	11.74	11.0178	11.0831	11.857	12.3417	11.3696	11.2155	11.3855	10.9194	10.6658	11.2902	11.1185	11.2196	10.5969	10.7371	12.039	11.4311	11.1265	10.3695	11.3629	10.8313	11.4783	11.2212	12.3637	11.0149	11.0546	11.5923	10.5248	10.7988	10.9785	11.3486	11.0495	11.3385	11.5035	11.4352	11.2075	11.1585
ST8SIA3	8.73e-17	8.40347	6.1126	7.32845	7.61346	7.18691	7.15209	7.33571	6.53867	6.92891	8.43287	8.15913	8.71875	6.03949	7.30937	9.23097	10.2986	7.50646	6.17555	7.43949	6.90206	7.54395	6.8966	6.51666	8.58926	8.69198	6.3149	9.9245	7.57034	7.77003	6.94938	6.59238	6.66909	7.23654	8.11028	9.84163	6.10151	7.39132	7.18205	7.39972	7.03417	7.99861	7.27271	6.2406	7.26651	7.35401	7.256	6.70791	6.86216
SAMHD1	8.75e-17	9.75077	10.6166	10.5367	9.83545	10.2296	9.98865	9.96186	10.2204	9.64181	10.2331	10.2429	9.44567	9.79913	10.5268	9.34818	8.89504	10.226	10.4605	9.66551	10.3914	10.3022	9.54461	9.75779	10.0427	9.23893	10.2047	9.99962	9.29209	9.81419	10.8444	9.89293	10.8157	10.2442	9.63614	8.57117	9.83103	10.2898	9.56793	9.89894	9.94627	9.54064	10.1814	9.6397	10.3866	9.88291	10.5607	9.82427	9.80028
CAMK2B	8.93e-17	9.23799	8.5455	9.23097	8.55354	8.57058	9.44137	8.84258	7.40723	9.51769	9.72429	8.44596	10.3394	8.92062	8.75219	9.41514	11.1619	8.45707	7.70667	8.73226	8.82724	8.58817	9.43762	7.97322	8.89684	7.62333	8.15275	10.3161	8.69734	9.48671	9.40929	7.57804	7.67092	9.25053	9.0614	11.365	8.1357	8.62062	7.1516	6.91122	8.14073	9.4356	7.5508	9.07256	9.24401	7.41996	9.04789	7.92524	7.67045
STOX2	9.41e-17	9.00396	8.3401	9.39871	8.32496	9.91701	8.47591	8.83504	9.10208	7.64242	9.60617	9.35831	10.1684	8.52143	8.92788	9.86613	10.1469	8.3465	7.55113	8.77567	8.35373	10.2225	8.76246	7.78249	9.90516	9.53497	7.45831	9.84673	8.95235	8.96759	7.36082	8.79469	9.16395	10.3631	9.1319	10.213	8.89139	8.88628	8.62919	8.49938	7.89615	9.28582	9.22286	8.5836	8.59525	8.70332	9.32516	8.27685	8.85611
ZIC1	1.01e-16	9.70251	9.70426	9.9245	10.3329	9.49534	10.007	9.96048	10.4591	12.2735	11.6508	10.3425	9.58546	11.6981	11.1991	9.79913	9.02119	7.46893	10.04	10.0056	12.229	8.73093	9.31907	11.7066	9.9192	10.6092	9.83514	10.2422	9.33711	10.4153	11.7659	12.7303	11.1619	10.7969	11.2196	6.64978	12.2647	9.32502	11.7146	10.2392	12.1944	9.73192	11.4415	11.057	9.56915	10.6712	11.2155	12.0112	10.3278
AGTRAP	1.01e-16	9.70785	9.67774	9.54781	9.4663	9.68658	9.31878	9.40497	9.48618	9.83274	9.19808	8.65046	8.9518	9.9036	9.55937	8.54145	8.2098	9.97012	9.50118	9.79569	9.87696	9.09333	8.80947	9.81286	9.22356	8.94502	9.71194	8.90894	9.23866	9.08902	9.31738	9.62424	9.38606	8.95061	9.39697	7.91372	9.71706	9.63258	8.94474	9.42586	9.58882	9.55486	9.41458	9.50384	10.0188	9.24099	9.19406	9.4138	10.442
B3GNT1	1.03e-16	10.7082	10.1489	10.2687	10.0201	10.1548	10.5541	10.1318	9.96664	10.3434	11.1919	11.0342	11.4023	10.1359	10.5991	11.3608	12.025	10.6871	9.85763	11.0178	10.4245	10.3994	10.7671	10.6757	10.3111	9.53526	9.93584	11.5862	9.9443	10.287	10.018	9.93968	9.72732	10.1746	10.5862	11.7925	10.0893	9.13738	9.89468	9.97649	10.4818	10.5584	10.6186	10.2991	10.7687	10.3675	10.8909	9.98023	10.7127
CISD1	1.04e-16	9.81702	9.90858	9.93278	9.51769	9.65972	9.86343	9.62208	9.8157	9.40646	9.9014	11.1815	10.3278	9.44692	9.80254	10.0592	10.8948	10.0315	9.92282	10.0872	9.58971	9.0912	9.85935	9.32009	9.80734	8.80273	9.87312	10.265	10.0789	9.51569	9.22469	9.37268	8.8445	9.54461	9.57177	10.491	9.90432	10.6122	9.07695	9.31979	9.28814	9.43606	10.639	9.64954	10.5598	10.7671	10.0882	10.0495	9.50817
NUP160	1.04e-16	8.99844	8.9191	8.31687	9.09522	8.18889	9.0645	9.12509	9.18158	8.76133	8.68472	8.96186	8.07145	8.92597	8.67366	8.26154	7.15195	8.43114	9.2234	8.72056	9.61059	8.96807	8.68448	9.40009	8.62535	8.65558	8.7063	8.45243	8.79146	8.89243	9.49442	8.5307	8.52963	9.01881	8.28671	7.53215	8.67448	8.55053	8.81278	8.90149	8.78618	8.97099	8.79108	8.9152	8.09116	9.13738	8.76746	9.2259	8.74034
NCOA7	1.04e-16	10.1621	9.57495	10.7404	8.42785	10.78	9.77342	8.43086	8.68709	8.17702	10.3954	8.97723	10.2953	9.1634	9.69466	10.7446	11.2852	10.0141	9.64648	9.9917	8.72777	10.0735	9.10974	8.67637	10.1012	9.59284	9.09249	10.8076	9.48018	10.0017	8.62035	8.32255	9.11097	8.89425	8.9413	11.1822	9.15152	9.40193	10.5424	9.33668	9.43366	10.188	9.40733	9.08337	9.36408	9.16073	9.47156	9.81356	9.86678
RCC1	1.04e-16	8.48638	8.96186	8.28201	9.31491	8.04835	8.01285	9.1229	9.45436	8.95912	8.5172	8.0307	9.43052	8.89218	8.14586	7.79142	6.89208	8.38598	9.02016	8.69581	9.44401	8.56656	8.35101	8.5201	8.63578	8.7779	8.88414	8.08286	9.38788	8.85386	9.41073	8.98162	9.28674	8.72324	9.06571	7.50347	8.39948	8.66425	8.23935	9.32987	8.57739	8.92014	8.92432	8.8472	8.35564	9.26851	8.80139	8.75082	8.72218
ARRB1	1.05e-16	9.50292	7.93919	9.17266	7.36133	8.96609	8.63904	7.4743	7.97867	7.56817	9.06571	8.06942	9.19686	7.6238	8.39158	9.85999	10.303	8.91209	8.23738	8.43004	7.62306	8.60747	8.55579	7.50533	9.23767	8.81525	7.48173	9.47531	8.35615	8.67422	7.23168	7.35884	7.03331	6.84066	8.14392	10.1384	8.02047	7.35325	9.14961	7.1558	7.72652	8.6921	8.35361	7.87091	8.8963	8.02617	8.71549	7.78726	7.90884
NMI	1.07e-16	9.75143	10.6728	9.80347	10.2831	9.98351	10.2772	10.3941	10.0405	9.67979	9.55251	9.29878	9.15121	10.6531	9.71972	8.34761	7.87428	10.4638	10.9464	10.307	10.3552	9.95085	9.68627	10.2959	9.22797	9.24785	10.2913	9.39249	9.69398	9.85223	9.41619	9.96048	9.54838	9.49786	10.4534	8.39625	10.6262	10.9708	10.4485	10.6081	10.5904	9.66456	9.42043	10.1746	10.3724	9.64983	10.6855	9.34805	10.0717
MACROD2	1.07e-16	7.33833	6.21317	7.55601	5.81632	7.40188	6.65616	6.47215	7.31263	6.80457	7.33109	6.46169	8.50548	6.44469	6.77389	8.1911	8.79921	6.53491	5.73623	7.40232	5.86349	7.28718	6.16719	5.85682	7.35806	6.95733	6.32758	8.04713	6.88309	6.95673	7.63083	8.70399	6.90394	7.35241	6.58214	8.97657	5.72959	9.90536	7.37416	8.33539	6.64283	6.62375	7.32435	6.76664	6.57919	7.82541	7.97914	5.82956	6.69452
TROVE2	1.07e-16	11.3194	11.1364	11.0019	11.1734	11.4707	11.2091	11.0495	11.3679	11.0272	11.5198	11.4182	11.4332	11.2815	11.6124	11.2179	10.2519	11.2527	10.8705	10.7328	10.3425	11.4935	10.9252	11.0723	11.2317	11.9917	11.4914	10.8756	11.3067	11.367	12.2757	11.7803	11.3131	11.5639	12.0282	10.5448	11.2484	11.9095	10.3972	11.6423	11.2962	11.2032	11.7385	11.2688	11.5333	11.2122	11.3661	10.6171	10.9592
KLHL3	1.09e-16	7.8809	6.92825	8.60286	7.57595	8.35901	5.80984	7.84564	6.70474	5.27261	8.05495	7.57209	8.10268	7.60974	8.04522	8.65769	8.78954	7.97322	7.48342	7.36594	6.3042	7.59108	7.49464	6.42848	7.92511	8.16402	7.16445	8.34889	6.90615	7.62306	6.60421	6.30337	7.34444	8.19887	7.42502	8.64924	8.12932	7.48546	8.35564	6.08701	7.0364	7.64852	7.64307	7.00128	7.24109	6.8317	7.8246	6.76998	7.68893
HLA-G	1.09e-16	12.2601	13.5595	12.4717	13.157	12.8065	12.2049	12.8301	12.7552	12.3713	11.5684	12.3515	12.2871	13.157	12.3755	10.9812	10.7875	12.7116	12.817	13.0839	13.8733	12.039	11.7753	13.2409	11.9819	11.486	12.7365	12.0354	12.9543	11.7199	11.3223	12.5534	12.2268	11.5247	11.8779	10.7382	11.7659	11.748	12.8577	12.9949	12.5289	11.6709	12.4554	12.915	12.1341	12.5132	12.5599	12.4084	11.8376
GJC1	1.11e-16	8.97319	9.34247	9.09702	9.22229	8.3255	9.45778	9.2631	9.17085	9.11058	8.92898	7.80038	9.22229	8.98215	8.11681	6.84294	7.80782	7.52517	9.63229	7.10824	10.0431	8.53318	8.26384	8.7246	8.76469	9.17394	9.68134	8.41967	9.34953	9.43238	9.13814	9.90395	9.60396	8.01013	9.29317	7.73261	8.6793	8.79578	9.19376	9.70154	8.73962	8.98134	9.22668	9.56383	8.6201	9.12042	8.18781	9.80006	8.85456
SCN2B	1.12e-16	8.46845	6.32973	8.85892	6.56766	8.48374	7.98136	6.39171	6.54074	6.72416	8.29581	8.01373	9.23684	7.27406	7.84475	8.7627	10.2067	7.54948	6.34361	8.1837	6.46458	7.23667	7.3583	7.12003	7.86237	7.44167	6.6972	9.40193	7.60415	7.74185	5.19058	6.90437	6.38063	7.98326	8.09691	10.0999	5.97749	6.32991	7.10858	5.8161	5.96212	8.0131	5.46277	6.71116	7.67995	6.75548	7.56374	6.99271	7.04881
RP2	1.13e-16	8.32103	8.83902	8.56485	8.43791	8.15541	8.51176	8.5468	9.17188	8.48638	8.97613	8.37463	7.63542	8.91002	8.79457	8.24505	6.40884	8.92374	9.2577	7.62503	8.70258	8.77649	8.54734	8.82938	8.38919	8.94285	8.85443	8.20439	8.63866	8.74157	9.63672	8.36364	9.47304	9.0301	7.93082	6.6005	9.12466	8.6793	8.40319	9.01438	8.81352	8.28263	9.13715	8.55773	8.50918	8.64975	8.50598	8.87802	8.19786
TPBGL	1.13e-16	7.92025	7.64174	7.3341	7.52517	7.54704	6.94167	7.56504	7.54412	8.06927	7.56135	7.83096	7.90564	7.18259	7.67426	7.94325	9.13335	8.14492	7.05972	7.5921	7.5876	7.23312	7.72986	6.84673	7.87814	7.59824	8.01766	8.23306	7.6497	7.43865	6.70846	7.44208	7.42527	7.87078	7.69015	8.30087	7.32158	7.55029	7.35416	8.06552	6.96615	7.38923	7.69549	7.75731	7.77524	7.45375	6.9086	7.29153	6.6524
IRAK1	1.16e-16	10.5306	10.9181	10.5284	10.3909	10.7431	10.6441	10.2953	10.7012	10.7738	10.3476	10.7078	10.5157	10.8847	11.3477	9.73495	9.67679	11.0033	10.9966	10.8391	11.9313	10.4793	10.5883	10.8512	10.3028	10.286	10.8267	10.3342	11.2188	10.6405	10.9303	11.1676	10.2216	9.9126	11.0185	9.55314	10.9849	11.0107	9.68781	10.3255	10.8348	10.4263	10.5669	10.8866	10.9905	10.6289	10.8331	10.5066	11.4321
VIP	1.17e-16	6.43036	5.38617	6.77922	6.01095	5.33776	5.58683	3.73362	6.14577	5.26504	6.55145	2.24199	7.75795	5.52275	5.93518	8.04753	8.89969	5.27116	5.61107	6.83955	4.79351	5.40626	6.62793	3.79913	7.0183	6.36496	5.61255	7.45736	5.95217	6.11374	5.69218	5.84225	4.86843	3.40569	6.05838	8.25423	3.56381	5.25382	7.85888	5.2418	4.08376	4.52184	4.59191	4.84867	3.3744	3.43947	6.46813	5.99363	5.62222
SDR16C5	1.19e-16	6.11413	6.20414	5.78432	6.69091	5.77157	6.49486	3.0701	6.26882	5.47789	6.80783	5.49231	6.76968	5.46064	3.62277	6.13955	8.09631	6.55969	6.11193	6.38691	6.3113	6.0849	6.13078	4.99149	6.94658	5.4687	5.6797	7.38749	6.78624	5.66724	5.31146	5.73787	6.52491	5.97789	7.17882	7.575	5.93772	4.30789	4.98023	4.54099	3.97792	5.33045	5.14913	6.7142	6.33605	5.92957	5.78722	3.94756	5.79894
REPS2	1.19e-16	8.7904	6.93302	9.60703	6.24409	8.90149	7.84924	6.22979	8.05777	6.42302	8.31819	9.08403	9.28931	5.52141	7.60519	9.7125	10.7489	7.61322	6.66953	7.44773	6.89127	6.99911	7.09304	6.32892	8.62624	8.17951	6.62954	9.75247	8.57396	8.21367	5.71136	5.5606	7.5343	6.80225	7.83602	10.4099	6.53393	6.9776	8.16311	6.83408	6.14616	8.02541	7.98122	6.78759	7.04383	8.98781	7.83945	6.14043	7.05289
DDN	1.2e-16	9.51515	4.50093	6.42271	4.8179	5.78956	5.41153	4.92443	4.17207	4.1393	5.25069	4.98817	10.4617	4.52839	6.02661	10.1707	11.6264	5.26027	4.66686	4.83504	4.10183	5.19453	5.19135	4.26353	7.98551	4.44563	5.33367	9.22895	4.8382	5.32247	5.71313	5.27967	6.11774	4.43073	8.65642	11.2164	4.19847	4.80366	5.17796	5.19811	4.88353	6.76934	3.54525	4.12173	3.76462	5.34834	6.74252	4.60504	5.32371
ZNF365	1.26e-16	9.68107	7.0224	10.3329	7.28384	9.9126	8.97546	7.29356	8.37463	7.63595	10.2764	8.53733	10.4553	7.42461	8.60222	10.4948	11.5874	8.67394	7.70281	8.56137	7.51316	8.18304	8.77465	8.68448	9.8469	8.63077	7.51173	10.78	8.98429	9.18544	7.86345	6.74533	7.73766	9.95249	9.42447	11.413	8.29581	7.34545	6.20909	8.39119	7.56806	9.37119	8.99525	7.84023	8.79772	8.11314	9.30523	7.65803	7.59917
TPRG1L	1.27e-16	11.2228	9.74924	10.9516	9.42643	10.7808	11.1919	9.49199	9.259	9.84034	11.1719	9.64868	11.2962	10.2225	10.6191	11.0635	12.3982	11.0275	10.7786	10.994	10.1973	10.3078	10.0803	10.0356	10.7542	10.293	9.9954	11.9236	11.0079	10.6163	9.93819	9.8793	9.43748	9.27601	10.3735	12.0583	10.2901	9.45558	11.2107	10.0908	10.4775	10.8918	10.0809	10.1448	10.1912	10.3632	10.7242	10.6816	11.5454
SAMD12	1.28e-16	8.43868	7.17151	9.04975	6.47189	8.76951	7.81584	6.00969	8.40968	6.73591	8.48239	6.87769	9.56199	5.96936	8.23072	9.48049	10.6191	7.39864	6.23821	7.57165	6.4329	7.13973	7.8024	6.61243	8.62977	7.64798	6.73706	9.72324	8.14363	8.20135	5.59572	6.74623	7.63183	7.09744	8.25737	10.9853	6.39381	5.89525	7.321	5.74449	6.20283	8.33072	6.72293	8.194	7.65614	7.25057	8.32674	7.0865	6.57361
NELL1	1.3e-16	6.8011	5.95022	5.91567	6.31074	5.22192	7.18932	4.96579	4.05923	4.98755	6.62175	5.92092	7.13775	5.5245	7.30003	6.19619	9.15447	6.36461	5.76402	6.17406	6.10503	6.12128	8.83786	5.74227	6.52934	4.03173	4.75461	7.67691	6.96797	6.68817	5.2053	4.22375	4.55165	6.78608	7.86855	8.13898	5.54764	6.28503	6.91517	6.18475	4.80366	6.51801	5.70161	6.30643	5.90454	5.73256	6.88887	4.75264	5.64017
KIAA1107	1.35e-16	9.51033	7.41341	10.0321	6.32299	8.76875	8.76164	6.69689	8.00847	6.99127	9.80578	8.39756	10.2325	6.9877	7.37745	10.3223	11.5578	8.52308	6.6802	8.60524	7.17251	8.38674	8.47489	7.00883	9.49289	8.62287	6.41878	11.081	8.66439	8.51004	6.91904	6.10922	7.93843	8.29881	9.04471	11.2308	6.63569	6.81254	7.21621	7.09245	6.10011	8.66907	8.06566	6.90128	8.20017	7.61517	8.7059	7.29153	7.78893
TRAPPC6B	1.35e-16	10.3	9.97307	10.2823	9.94904	9.86912	10.0499	9.94263	9.18635	9.62046	10.1945	10.2183	10.4934	9.62866	9.70549	10.4622	10.8008	9.51831	9.50981	10.1036	9.61668	10.2989	10.0848	9.82681	10.4048	10.0527	9.82777	10.6221	10.4673	9.91643	8.9675	9.14048	9.33798	10.6526	9.43266	10.7152	9.42043	10.0315	9.6397	10.3135	9.66361	9.8959	9.89922	10.0285	9.22053	9.9534	9.50441	9.96714	9.85101
HABP4	1.39e-16	9.21534	8.42636	8.96784	8.82532	8.81978	8.85373	8.64036	8.72989	8.76246	8.65152	8.96622	9.83134	7.92708	8.36542	9.4515	10.1246	8.93764	8.74575	8.94072	7.99108	9.1963	8.78377	7.90855	9.33811	9.05977	8.75766	9.34027	9.20884	9.08649	8.70953	6.51611	9.07533	8.93673	8.80975	10.3476	8.72592	8.37109	8.59189	9.17336	8.99055	9.0983	9.26197	8.82789	8.42785	8.90391	8.71256	8.55	8.70777
IGSF8	1.42e-16	9.93052	9.2366	10.6691	9.55453	10.5056	9.02142	9.45839	9.01744	8.63948	9.51855	10.0259	10.6455	8.96636	10.4642	10.6025	10.741	9.20646	8.75188	9.1668	9.07544	9.05028	9.86063	9.42911	9.43548	9.48986	10.0107	10.3786	9.54128	9.91984	9.291	9.75582	8.15659	9.53056	8.80327	11.3076	9.03645	8.33296	8.64898	8.98634	8.77914	10.2332	9.50236	9.7068	10.0194	9.70535	10.1101	8.47038	9.56216
AK5	1.43e-16	10.8816	7.31049	10.7993	5.99934	10.476	10.2645	5.9439	7.73	7.58679	10.7339	6.93553	11.3629	6.39116	9.63129	11.6373	12.896	9.80055	7.39553	9.36383	7.7584	8.84744	9.81235	5.87875	10.6877	9.92872	7.34388	11.7335	9.81537	10.0966	6.58416	5.28879	6.47027	6.60177	9.48349	12.2893	8.40805	7.3111	6.31767	6.40474	8.35264	10.3121	6.94038	8.04887	7.9667	8.86847	10.1853	7.53888	8.30973
HLA-A	1.44e-16	14.3249	14.5488	14.4055	14.4055	14.5231	13.769	14.3427	14.241	13.9934	13.9729	14.1062	14.3427	14.5231	14.3847	13.275	12.5387	14.4055	14.4055	14.5934	14.7407	13.8823	13.7145	14.3072	14.4262	13.9934	14.3624	14.2898	14.2117	14.0023	13.5442	14.132	14.241	13.9729	13.6545	12.4471	14.132	14.2117	14.3249	14.4262	14.5231	13.4924	14.1619	14.132	14.132	14.132	14.3624	14.0393	14.1062
DHRSX	1.45e-16	7.01047	8.86188	7.10185	9.58882	8.31446	9.10455	9.49027	8.48279	9.34042	8.74691	8.65222	8.69002	9.54307	9.28307	6.82378	6.93453	8.95803	9.09522	9.35167	9.72544	9.15737	8.97263	9.44661	9.14268	8.71129	9.05697	7.66337	8.57587	8.26554	7.9287	9.97029	9.45587	8.23554	9.9837	7.13111	9.93545	9.9589	9.38073	8.66979	9.4505	9.00782	8.5958	9.57191	8.83477	9.32111	9.15166	8.83592	8.91339
TULP4	1.46e-16	10.2047	8.67498	9.97936	8.70669	10.2727	8.68798	8.85409	9.29878	8.76691	9.76973	8.90481	9.66032	8.73342	9.33313	10.4267	10.2913	9.02228	8.9675	8.65719	8.5914	9.34306	9.17007	8.66042	9.61059	9.57902	7.91039	9.94004	8.96939	9.11924	7.81991	8.17845	8.87539	9.00356	8.75986	10.6355	8.74278	8.81104	9.20078	9.01469	8.45425	9.54764	9.14477	8.63736	8.05737	8.90255	9.16422	8.65892	8.58915
MAK	1.47e-16	7.68576	6.515	5.00073	6.5283	6.1108	6.96808	7.56806	6.32434	6.76898	4.69057	6.9086	5.95489	5.71536	6.1158	3.40647	3.70589	8.11613	6.55934	5.50921	6.981	4.99822	6.02679	5.39659	6.45749	6.54203	6.88528	6.4789	7.26637	7.01928	6.58317	6.39784	7.24853	6.40392	6.7211	4.94741	5.6131	6.07569	4.3765	6.53021	6.55301	6.33943	5.01222	5.98589	4.14251	3.47628	6.09056	6.57556	5.54764
CDCA7L	1.47e-16	10.5211	10.998	9.71161	10.842	9.26579	10.6092	10.8909	10.8897	11.4772	10.581	7.10754	10.7252	11.3456	11.2065	9.54559	7.28057	8.8445	10.0431	11.1161	11.1694	10.5934	10.0036	11.131	10.4218	10.4771	10.1949	9.05015	10.5399	10.7018	10.0484	12.3278	11.043	9.62357	12.2207	8.04453	11.4081	11.3248	9.55846	10.4757	11.131	10.0966	8.59189	10.5873	9.61101	10.4713	9.84916	10.9205	9.27013
DCPS	1.48e-16	9.01082	9.05086	8.15721	9.291	8.36406	8.98974	9.53934	9.50005	9.74358	8.852	8.95367	8.56774	9.35878	8.59153	8.50179	8.39784	8.65139	9.24211	9.83633	10.105	9.36383	8.97809	9.45489	9.03289	8.90869	9.3136	8.57504	9.23125	9.38727	9.56083	9.48003	8.55483	8.35157	9.10411	7.25832	8.97824	9.85609	8.89034	9.22229	9.34587	9.15251	8.83731	9.76745	9.40601	9.24707	9.17877	8.87619	8.74918
HNRNPAB	1.5e-16	11.6508	11.4914	11.6089	12.7442	11.2119	12.117	12.6818	12.9316	12.5967	11.7006	12.1771	12.2735	12.0547	11.6136	11.1628	10.4026	11.5399	12.4664	12.111	12.3583	12.0216	11.8184	11.8216	12.3181	12.2824	12.3492	11.5968	12.8256	12.0924	12.0148	12.7913	12.7018	12.5778	12.5683	10.955	12.4471	12.2151	10.9892	11.7241	12.1486	12.0547	12.1708	12.2669	11.7831	12.1393	11.8796	12.0372	12.1955
OST4	1.51e-16	11.7226	11.9979	11.6785	11.6078	11.7803	11.7241	11.7031	11.9594	11.9188	11.7796	11.4828	10.7184	12.3713	11.7803	11.2115	10.626	12.217	12.354	12.7442	11.5731	11.8121	11.4958	12.5871	11.8332	12.0095	12.2229	11.7672	12.2189	11.7241	11.2043	11.1837	11.7199	11.2083	11.7172	10.9211	12.0844	11.7348	11.7872	12.2384	12.2069	12.2358	12.113	12.0408	12.3417	12.6887	11.958	12.299	12.3884
TLL2	1.51e-16	5.76826	5.67249	5.68937	5.33202	6.48091	4.87953	3.83113	4.21916	4.12606	5.42584	5.45006	5.93132	4.53313	4.41763	6.91586	6.74026	6.00457	5.11867	4.95759	5.41554	5.69595	5.1318	4.88226	5.80002	5.69947	4.98755	6.40101	5.5534	6.52736	4.48967	5.00665	5.22064	5.20319	5.00782	6.75884	5.31975	6.08017	7.04253	6.05838	4.78238	4.52776	5.16041	4.13614	4.03765	5.7953	5.61733	5.17532	5.68222
MPP2	1.56e-16	9.86278	9.14829	10.3728	9.17561	9.89922	9.61087	8.7287	10.0869	8.82641	9.24428	10.0854	9.94194	9.21812	9.14772	10.2827	10.1845	9.34848	8.45204	9.67202	9.58281	9.5677	9.41409	9.47738	9.28609	9.82169	9.24749	9.61315	9.6208	9.01122	9.19713	9.14345	9.61668	9.16861	9.32712	10.5913	8.98836	9.55576	9.08235	8.82349	8.8741	9.64148	9.52777	9.12103	9.33685	9.12314	9.34761	9.13446	8.84705
NIPA1	1.56e-16	9.26472	8.45066	10.1011	7.93217	10.1064	8.58625	7.74532	8.65392	8.76716	9.24252	9.32257	9.40044	8.58034	9.66002	9.99035	9.78998	8.93951	8.80074	8.70212	8.29099	8.93964	8.64911	9.13602	8.95675	9.19931	8.54868	8.60538	8.83276	8.82545	8.21793	8.14986	8.17393	9.31052	8.29897	10.303	8.47635	8.04399	8.46115	8.77815	8.27134	9.30559	8.53758	8.8962	8.36935	8.94448	9.13363	8.28091	8.64951
MCHR2	1.58e-16	4.46633	4.2182	4.107	3.60648	4.46371	4.88545	4.09484	4.2098	3.50532	4.04632	4.1658	3.81048	4.79375	4.68153	3.9972	4.61537	3.90102	3.8003	5.21441	3.82762	3.7689	4.70723	3.70062	3.84697	3.93929	4.17093	4.89551	4.66598	3.67607	4.75137	4.93565	3.89076	6.49319	4.42998	5.52571	3.60648	3.62209	5.34055	3.87541	3.76332	4.66806	3.55147	5.4953	5.12513	4.11137	3.63394	3.93771	3.89548
IPCEF1	1.6e-16	9.69538	7.81032	9.62063	7.23733	8.58638	8.63469	7.83149	7.60835	7.06005	9.47261	7.53508	10.5098	7.90239	9.28416	9.80446	11.2107	8.36187	8.10903	7.91708	8.04071	7.13245	8.40914	6.81287	9.04405	7.99941	7.67092	10.1853	8.61369	9.15397	6.96089	7.23346	6.63002	6.81353	9.01275	11.2662	6.85124	8.35015	7.84956	7.36378	6.93293	9.06117	8.48293	7.42136	8.18768	7.7821	9.18404	7.58403	7.50791
ROGDI	1.65e-16	10.6953	9.12232	11.4159	9.23405	11.4146	9.50158	8.99607	9.71105	9.4316	10.7465	9.83308	11.1611	9.18145	10.8041	11.41	11.603	9.79181	8.9002	9.67871	9.74195	10.1786	9.69771	9.20897	10.3081	10.6344	9.38328	10.6691	9.96375	10.5117	9.13549	9.57902	9.13491	9.26392	9.75905	11.8584	9.80826	8.55785	8.77232	8.47878	9.65735	10.6715	9.19543	9.74924	9.93545	10.4571	10.4843	9.41471	9.72792
COL4A1	1.66e-16	11.9298	13.1782	13.0083	12.113	12.0234	11.9779	12.1486	11.673	12.6107	13.2522	10.171	7.67377	12.6573	9.76649	8.49446	7.46314	11.3992	13.464	10.7201	12.8538	11.5719	11.3149	13.1191	12.4826	12.5195	13.0986	12.0372	12.4229	12.5909	12.1771	12.5132	13.9729	11.9284	11.9641	7.63462	12.0618	12.2131	13.0042	12.0978	13.1139	12.0844	11.2203	12.6035	11.8525	10.8776	8.95675	13.5595	11.3912
CELF5	1.71e-16	9.38694	6.75089	7.6004	6.69061	6.7968	7.93819	7.07876	8.64036	6.10309	8.39524	9.22286	9.93716	6.54012	7.11276	9.74292	10.33	8.25539	6.58331	7.32697	8.01153	8.49675	8.39836	6.91029	8.8542	9.37431	6.18868	9.43861	8.21367	8.33412	6.25184	7.62865	7.98194	9.12016	7.84344	10.5089	6.21162	6.95881	6.22655	7.66573	7.09047	8.4067	9.04225	6.71028	7.19019	8.32117	8.28105	6.6151	5.95989
LOC284578	1.73e-16	5.76955	4.43969	5.98542	4.9538	6.05586	5.13952	3.91133	4.31028	4.6322	6.17907	5.145	6.7094	4.60017	4.42263	6.17373	7.72223	4.63307	4.90028	5.70651	5.4687	5.24467	4.67923	4.52613	6.61879	3.6909	4.11711	7.10319	5.20824	4.73784	6.47172	2.96246	5.10544	4.97952	6.60433	8.28226	4.63456	2.99762	4.99971	4.87637	6.07835	4.48891	5.03513	4.89627	6.17352	4.81246	6.1652	4.91914	4.37589
RBL1	1.74e-16	7.11329	7.37362	6.68831	8.09714	6.80037	7.41047	7.95123	7.61802	7.58731	7.37264	6.81933	7.17466	7.46908	7.1499	7.17319	6.18321	7.1906	7.68008	6.897	6.88842	7.41569	6.98382	7.65579	7.72862	7.4194	7.66296	6.47817	7.74171	7.77767	8.32092	8.1241	7.79168	8.14534	7.10198	6.54203	7.41641	7.92282	6.6711	7.5093	7.72776	7.06616	7.1228	8.02366	7.09688	7.53201	6.73288	7.70512	7.86965
SNCA	1.79e-16	10.2654	8.79604	10.5103	7.44667	10.0435	9.76714	7.23842	7.94854	7.73738	10.0239	10.6718	11.4717	8.33101	9.29866	10.7206	12.1983	9.83103	8.27775	8.79961	8.13303	8.12355	9.07584	8.25564	10.4793	8.77427	8.16995	11.5164	9.62803	9.95972	7.30768	7.9834	7.22108	10.115	9.52308	12.1187	8.41135	7.3936	8.46008	7.59096	7.76475	9.71178	7.49659	8.71743	9.1389	8.52116	10.1722	8.25206	7.99266
NAPB	1.8e-16	10.6701	8.70904	10.0366	8.82641	9.71121	10.2957	8.90418	8.19692	9.0286	10.7056	9.26664	11.8121	8.48702	8.86529	10.83	12.434	9.83274	8.74344	9.5817	8.5307	9.13523	9.62679	8.40293	10.7988	9.06757	8.75137	11.8539	10.2287	10.0412	10.1166	8.84587	8.4576	8.22013	10.053	12.444	8.66253	8.33551	8.92272	8.58059	9.13085	10.383	8.70118	9.34332	9.01397	8.52687	10.2519	8.62888	8.17269
NEURL1	1.83e-16	7.54145	7.00462	7.0894	7.16156	7.39638	7.65783	7.10794	7.34331	7.54961	7.2249	7.66658	8.32327	7.14977	7.13083	8.24173	8.54988	7.55226	7.40711	7.45503	7.10366	6.93529	6.96499	7.53981	7.57475	6.63108	7.05181	7.74143	6.68269	7.25889	7.68058	7.32588	6.82142	7.05475	7.59459	8.75204	6.93723	6.78653	7.59863	7.03685	7.05612	7.47399	7.25803	7.02607	7.37745	6.897	7.37911	7.04371	7.11924
KCNQ3	1.85e-16	9.23767	8.485	9.40876	8.07983	8.41297	8.89231	7.65366	8.04753	7.88025	9.23045	8.34165	9.43144	8.48426	8.64975	9.02983	10.3009	8.93023	8.44153	8.7029	7.74143	9.00318	9.04103	8.12874	8.78429	8.37123	8.20556	9.65486	9.02955	8.8122	7.95867	8.61599	8.4071	7.89277	8.94575	10.1341	8.36723	8.64544	7.83361	7.38089	8.08626	9.06676	8.34395	7.81801	8.7537	7.82885	9.0403	7.87928	8.37986
CASKIN1	1.91e-16	8.40197	7.29587	8.10985	7.27344	7.8733	8.02205	7.57382	7.47909	7.82234	8.03244	9.00205	9.18301	7.57267	7.81885	8.91182	9.08666	7.43039	6.33859	7.83306	6.78442	7.86288	8.02403	6.95199	7.95005	7.82133	7.25145	8.66425	7.56817	7.96141	8.13079	7.68852	7.45189	7.7084	8.60524	9.64384	7.40585	6.12787	6.10677	7.45529	7.14554	7.67262	7.41815	7.41641	7.45503	7.37264	7.81048	6.79205	6.47368
RTN4R	1.94e-16	8.28413	5.84179	8.19554	8.68307	7.38679	7.96887	8.66278	7.11137	7.46744	8.08827	8.3319	8.83214	6.98111	6.62249	9.13296	9.60675	7.22245	7.1182	7.7775	7.76218	8.12958	8.14744	6.91177	8.42481	7.10893	7.9561	9.17114	7.7821	7.24109	7.1946	7.20634	7.57672	7.37376	8.7501	10.0455	7.17011	6.60719	7.58833	7.19494	7.39503	7.92883	7.28995	6.45237	7.50237	7.9739	7.93026	7.17415	7.88267
GRM5	1.94e-16	7.77789	5.87487	7.39005	6.16176	6.32678	7.11586	5.96408	6.80705	5.39636	7.79594	8.02579	8.69905	5.71184	7.52412	8.617	9.99205	6.92891	7.42556	7.24007	5.3854	6.91324	6.9846	5.69947	8.02927	7.00055	5.97881	8.82265	6.93614	7.32435	8.54274	5.40301	6.11445	8.88702	7.11924	9.66487	6.05748	5.97749	5.2367	6.50946	6.26117	7.23546	6.35971	6.76448	7.76038	6.55812	7.57301	7.04158	6.34082
GRM3	2.06e-16	9.8092	7.80092	10.5334	7.05233	10.9701	8.49458	7.4197	6.51982	7.15862	10.3807	6.72416	10.0445	5.37153	9.0348	11.4469	11.0591	8.71719	5.71644	7.13915	7.16543	7.57967	7.41708	7.25917	9.30281	9.5362	7.32684	10.1112	7.82222	9.69877	8.14971	6.13823	6.64536	5.86958	7.58519	11.5804	7.68128	6.36006	4.7549	5.69819	7.07305	9.59344	4.73651	8.45565	7.1004	8.54411	8.88489	8.33721	5.83813
ZFP36L2	2.06e-16	11.5324	12.7082	11.6473	11.2902	11.3397	11.4469	11.1178	10.9646	12.354	11.9202	10.4589	10.811	12.488	11.9329	10.2225	9.11713	11.3629	11.9298	11.1214	11.1876	11.234	11.4737	11.5064	11.2653	11.234	12.0425	11.1265	11.2349	11.997	12.6001	12.0298	10.9537	10.64	11.9345	9.56447	12.0148	11.6057	12.4639	12.2151	12.2893	12.1324	11.7226	12.4554	11.3248	11.5566	12.0828	12.0036	11.4382
IL1RAPL1	2.06e-16	7.75718	5.85832	8.51879	7.07781	8.97686	6.70216	7.01498	7.81667	6.52403	8.13156	7.77229	8.21726	6.39629	7.97758	9.22812	9.29429	6.66768	6.36479	7.29852	5.62051	8.92374	7.57909	6.77047	8.12261	8.84519	5.72052	7.7623	7.13624	8.40256	6.13592	6.85157	7.77188	8.4844	7.56965	9.30078	6.87489	7.47457	7.27933	8.17368	6.46648	7.32734	7.79111	6.89816	6.58301	7.87729	7.65141	6.55198	5.96913
SCAI	2.09e-16	8.71022	7.30909	8.54112	8.175	7.98162	7.83764	8.43791	7.96751	7.99239	8.50889	8.46858	9.47156	7.57776	7.60053	9.00504	9.77791	7.77323	7.73518	7.97785	7.25302	8.86504	7.74065	7.30768	8.61802	8.60024	7.89223	9.09581	8.85921	8.2166	8.47759	7.92455	8.55658	7.98827	8.74169	9.88177	8.23512	7.68525	8.79934	9.00534	7.92295	8.46115	8.49651	7.99807	6.87539	8.18781	8.14182	7.86372	7.46816
ARHGAP44	2.09e-16	8.18448	7.56612	8.13449	7.30243	7.82209	7.77576	7.16427	7.52543	7.36274	7.86614	8.05179	8.64361	6.38922	7.02661	8.51327	9.15423	7.85281	7.68864	8.03606	7.24551	7.03517	7.64586	7.48777	7.95795	7.86161	7.44667	8.47489	7.90165	7.94713	7.34986	8.57074	6.63483	8.35986	8.31327	9.30991	7.77137	6.42611	7.99837	7.16209	7.66145	7.73119	7.52231	7.37981	7.63298	7.12851	8.0299	7.79722	7.93894
ADAP1	2.12e-16	10.321	8.9291	10.7988	8.59955	10.6636	9.45237	8.38206	8.73701	8.40118	10.3087	9.15093	10.3468	8.95624	10.1775	10.901	11.0142	9.87963	8.67743	9.30675	8.99607	9.76556	9.2825	8.88833	10.3798	9.78967	8.9094	10.2843	9.22508	9.71674	8.6351	9.04363	8.26831	8.87723	9.68748	11.5293	8.83872	8.63892	8.60286	8.70371	8.99471	10.4443	9.01411	9.22399	9.54573	10.1562	10.1474	8.92597	8.90855
ANXA1	2.15e-16	12.7599	12.5534	11.6956	11.2115	11.7161	11.8184	10.7465	11.5544	11.9677	12.111	8.95261	10.4003	11.5355	11.9456	8.61983	7.8208	13.0042	12.9197	12.434	9.41073	10.1841	9.28717	11.3316	11.268	9.31794	12.2824	11.186	11.7688	11.7066	12.6471	11.7212	12.5809	10.4974	11.4392	8.55892	12.8824	12.7018	12.3828	10.6077	13.0133	12.1708	12.9402	11.0272	12.6391	11.893	11.6757	12.254	13.275
TMEM155	2.18e-16	8.15183	7.52157	7.96887	7.09975	6.44775	7.43319	6.7217	6.16945	6.96324	8.39423	7.87078	9.99833	7.10245	7.39186	9.14087	10.7671	7.46064	6.09621	7.16695	7.36851	6.41602	7.39046	6.49426	8.08275	6.59705	6.12805	9.89563	8.28156	7.86288	6.72569	5.85427	3.73772	6.5109	8.39119	10.8789	5.99979	6.08864	6.76036	6.33333	5.16183	8.04546	5.81713	6.93924	6.0163	6.42645	8.20917	7.65971	5.89118
MAP2K1	2.25e-16	11.6709	11.4926	11.3447	10.9989	11.0868	11.5743	11.138	10.5745	11.053	11.3336	11.2534	11.9834	10.9565	10.7733	11.3495	12.4156	11.7255	11.4063	11.4717	10.8572	11.0796	11.367	11.6893	11.9054	10.0846	11.2542	12.3321	11.7645	11.4246	10.0493	10.9771	10.7641	10.8052	11.3185	12.5477	10.7624	10.7654	11.3562	11.3076	11.2317	11.8554	10.9659	10.9092	11.0914	10.9745	11.6486	11.3679	11.1515
DGKZ	2.28e-16	10.2615	9.70622	10.0068	10.8415	9.65012	9.37608	10.2191	8.99685	9.80413	10.005	9.07104	11.2869	9.85727	9.84785	10.5479	11.2099	9.43427	9.25648	8.83504	10.2856	8.76133	9.78512	9.51242	9.65459	8.74223	9.64326	10.9379	9.25824	9.35403	10.7454	8.91286	8.28443	9.58418	9.73961	11.4373	8.93256	9.11839	9.50964	9.16422	9.36614	9.82532	9.30523	9.48645	9.50512	9.09971	9.86035	8.88272	9.17954
SMPX	2.29e-16	4.56512	4.29526	3.99392	2.44082	3.74011	5.37183	3.3684	2.42452	3.00099	4.15065	4.1042	5.92556	2.46319	4.03551	4.33545	7.2377	5.3104	4.55953	4.15	4.1444	4.46035	3.50211	2.47975	4.67444	2.00018	2.6888	6.57468	2.00863	5.68551	4.07862	4.29887	3.46871	3.33168	4.13042	7.0767	3.07102	2.73216	3.83073	3.44482	3.55306	4.61369	3.93365	2.52277	2.44877	3.94157	3.83752	4.11785	4.3488
PPM1H	2.31e-16	8.61955	7.01225	9.6232	7.61468	9.48701	8.40531	7.56447	7.53049	7.39638	9.05592	7.81556	9.02983	7.47182	7.97515	9.84068	10.0798	7.87718	7.33394	7.57881	8.04217	7.26855	8.01578	6.70284	8.5246	8.16043	7.24513	9.49518	7.78977	8.59213	6.89519	6.57869	6.98173	8.89231	8.19692	10.224	7.41354	7.04813	10.206	7.54112	6.54811	8.49057	7.15904	8.43375	8.23613	8.14043	8.21016	8.09374	6.72017
ANXA2	2.38e-16	12.6429	12.8211	12.0812	11.9658	11.8304	11.1132	12.0442	12.0998	11.9627	11.842	9.64416	9.88259	12.4365	11.2246	9.59623	9.40009	13.2579	13.4085	11.8525	12.1378	11.7532	11.2815	13.2058	12.8911	10.8914	13.0938	12.4582	12.3228	11.9345	12.5717	11.5388	12.2131	13.018	11.3983	9.03896	12.8538	12.0961	13.7526	12.7337	13.2009	12.3957	12.1486	12.3155	13.1083	11.4749	11.9393	12.7082	12.945
MCM7	2.42e-16	10.171	10.0448	9.39529	10.5378	9.93879	10.7726	10.3767	10.4553	10.6269	9.38217	9.88291	11.3876	10.2943	9.62832	10.0559	9.11381	9.35272	10.0702	10.2407	11.364	10.6166	9.91594	10.0921	10.5362	10.7472	9.84962	9.50236	11.1154	10.4157	10.2599	11.2391	11.0416	9.92752	11.081	9.28702	9.94526	11.0481	9.90489	11.1218	10.3931	10.0745	9.92683	10.7274	9.44279	11.8449	9.40958	10.3666	9.98678
HPCA	2.45e-16	8.49313	6.62493	8.54158	7.25665	7.68032	9.30978	7.58303	7.2579	6.27791	9.39078	7.01564	10.2747	5.81561	7.37264	9.54824	10.6942	8.20929	7.2989	8.45925	8.18865	6.64392	8.48164	7.36477	8.7749	7.59824	6.49055	9.78241	8.73498	8.14641	8.08152	7.28028	6.65152	7.47619	8.94575	11.2745	7.1873	7.28677	5.70904	7.00965	7.28028	8.92922	3.66409	7.48805	8.63106	6.92535	9.04603	6.40746	7.8868
NDUFB8	2.48e-16	11.3514	11.103	11.3912	10.3456	11.3416	11.1976	10.6855	10.8463	10.5795	11.8167	11.1783	11.7519	10.453	10.9175	12.0133	12.406	10.9441	10.7744	10.9205	11.0445	10.9504	10.8555	10.637	11.5602	11.286	10.6614	11.7789	11.1637	11.6171	11.4421	11.032	10.9079	11.4902	10.9141	12.2647	11.0342	11.2391	11.6671	11.2228	10.583	11.3427	10.9034	10.9618	11.076	11.7967	11.413	10.7082	10.3399
COL4A2	2.48e-16	11.2333	12.7337	12.542	11.8106	11.4685	11.7186	11.7803	11.234	12.3778	12.5166	10.4829	8.75384	12.1071	9.54205	7.96928	8.48239	10.6866	12.8065	10.4375	12.6755	10.772	11.0967	13.1676	11.7117	11.8199	12.6887	11.5002	11.7659	11.8601	11.8093	12.1568	13.787	11.1991	11.6044	8.14507	11.3865	11.9694	12.5599	11.8659	12.6429	11.7018	10.4793	12.1446	11.7266	10.6779	9.01038	13.2281	11.2
TAGLN3	2.56e-16	11.6112	9.50147	11.1485	9.0444	9.77007	10.581	8.45387	11.062	8.93624	11.6813	11.1388	12.3559	9.70123	9.51769	12.0601	13.4924	10.7048	8.76469	10.0789	10.4722	10.4544	9.96029	9.24524	11.9305	11.409	9.60279	12.444	10.9296	10.7105	8.82211	9.80989	10.7042	10.5846	11.0323	13.3607	9.57396	10.4802	8.68422	10.0846	9.79148	11.5779	9.68345	9.3384	9.66985	10.7187	11.1288	9.36396	8.38165
NECAB2	2.57e-16	5.99184	5.40362	4.94077	5.40808	7.18815	8.41338	5.65999	4.5639	5.27261	8.11476	4.68462	9.81769	5.05365	4.88257	8.67337	9.64533	8.75645	4.30739	7.12515	4.84828	5.40808	4.7728	5.18235	8.79191	8.49675	5.18118	8.95963	5.48861	8.09959	5.07395	5.13587	5.24438	4.52808	6.32024	9.63873	4.40442	4.96622	4.44221	6.2889	4.74901	7.31486	4.70335	5.84607	6.00927	8.30973	7.10422	5.25973	4.5417
PPP2R2C	2.59e-16	9.02326	5.54965	9.54838	4.81567	9.04711	8.50918	5.34558	5.72028	5.88478	8.60209	8.56881	9.61787	5.79627	8.09437	9.83968	10.7624	8.28836	6.77332	7.8889	7.41802	7.71897	8.10155	5.78216	8.286	8.53733	5.66724	9.90489	8.09116	7.9698	6.29677	5.59999	5.80518	5.49968	8.88598	10.5459	6.58045	7.04881	5.77964	5.37708	5.65755	8.11745	5.6472	6.85254	8.55497	7.61552	8.27344	6.31689	5.52571
KDELC2	2.63e-16	10.3265	9.80686	9.57133	10.3958	9.64726	9.68491	9.88243	9.94293	9.75435	9.6714	8.33906	9.42826	10.1826	9.74748	9.05539	8.38699	10.1052	10.238	10.4007	10.4307	10.0995	9.7649	10.117	10.1659	9.34667	10.1389	10.1452	9.77007	9.72034	10.9732	9.77791	10.4829	10.5016	10.1489	8.71297	9.75807	10.3816	10.7612	10.3042	10.3816	9.77753	7.84497	10.1664	10.2063	9.09551	9.97954	10.1429	10.642
GNG3	2.66e-16	10.6728	8.64898	9.97936	7.09758	8.74542	10.1303	7.77646	8.46832	8.1991	10.5306	8.39094	11.6102	8.12697	9.74384	11.0824	12.5105	9.57578	7.93026	9.38086	10.2654	9.16306	10.4083	7.89758	10.1252	8.02888	8.59201	11.7902	9.61757	9.45558	7.88852	8.39144	7.48396	11.2253	10.3261	12.3302	8.11516	7.54548	7.89301	8.92801	8.43198	9.7348	9.28523	8.47108	10.256	8.02243	9.78168	8.5172	8.62549
HS6ST3	2.8e-16	7.19076	5.92993	7.02646	5.95871	6.6345	6.29806	4.93027	6.01251	5.59893	7.13233	5.49109	8.25698	5.54714	6.45807	7.64215	8.88467	6.49273	7.26885	6.4283	6.15157	5.56349	7.45801	5.59783	7.01768	5.87971	6.33823	7.90056	6.9971	6.77613	8.18256	5.5919	5.41922	6.50997	7.70425	8.37362	5.62863	6.6233	5.58146	6.57468	5.68527	6.44359	5.95752	6.59869	7.69082	5.03803	7.21199	5.92092	7.72862
CDCA3	2.82e-16	8.58612	8.99028	7.70468	9.56233	7.50997	8.8759	9.73741	9.38523	8.67872	8.37722	7.21894	8.48522	8.54101	7.33977	7.53006	6.6496	8.10165	9.3063	8.93038	9.35181	9.06865	9.35209	8.52259	9.18775	9.43889	9.42208	8.09552	9.16127	9.44252	9.78905	9.41239	9.82515	8.86305	9.36306	6.55682	8.90255	9.17727	7.63794	9.25282	9.72941	8.70882	8.34318	9.78642	8.55497	10.123	8.84347	8.86687	8.30863
CEP55	2.86e-16	8.47195	8.77719	6.145	8.63806	6.11613	7.7979	8.81117	9.62114	7.04466	7.69603	6.06854	6.82535	8.92826	6.34097	3.72312	3.22105	7.83347	9.25524	7.47972	7.97405	7.68601	8.04861	7.88827	8.73511	8.15986	8.99997	7.68395	8.59128	8.70399	8.41697	8.62838	9.06491	8.44912	7.91346	5.61134	8.31045	9.20305	6.52403	8.69129	9.1888	7.80542	7.32659	8.63692	8.24835	10.0789	7.35678	8.12355	7.49154
LAP3	2.92e-16	12.8373	12.5935	12.1626	12.6887	12.5935	12.6001	12.7082	12.4582	12.8619	12.0495	11.8525	12.6391	12.401	12.4203	11.3006	10.7012	12.7952	12.9949	12.6165	12.1393	12.3252	12.7018	12.2871	12.3043	11.1088	12.9098	11.8376	12.117	12.7952	10.7612	12.7832	11.3876	12.3686	12.9631	11.0385	12.9	13.2986	12.103	12.401	12.8373	12.2447	12.6296	12.945	12.9316	12.5289	13.4572	12.4965	11.6813
ATP8A2	2.95e-16	8.74691	6.02358	8.14016	6.35414	7.40616	8.68976	4.43732	5.55679	6.29769	8.18017	7.68113	8.72242	5.88203	6.98825	8.73356	10.2344	7.40799	5.62222	7.6079	6.13304	7.52938	7.23004	6.14711	8.36463	6.49778	5.99005	9.83274	7.66909	7.44193	5.49881	4.15445	5.24239	7.64291	8.1302	10.1923	5.11585	6.28228	6.97744	5.84285	6.3063	7.96928	6.27637	5.98827	7.61346	5.89796	7.58598	5.25353	6.17058
LMNB1	2.99e-16	10.0416	9.69799	8.68724	11.261	8.40118	9.6896	11.3837	11.0356	9.55665	8.82755	8.37051	10.5993	9.70562	8.22495	7.18108	6.36445	9.11839	9.95223	9.09442	10.3093	9.7065	9.62772	9.27148	10.4938	10.3958	10.5479	9.08403	10.9805	10.9966	10.0593	10.9898	11.031	10.3416	10.6614	6.90078	9.71732	10.0775	7.38089	9.19053	9.34218	10.3726	9.13059	10.1452	8.62637	9.57038	9.02845	9.54476	8.48744
VSIG4	3.01e-16	10.6118	13.0083	13.018	9.22286	13.0794	11.565	9.25235	10.6915	10.2418	12.4639	10.3447	9.5878	11.9564	12.4386	10.119	10.0004	12.4826	11.9015	11.3755	11.5077	12.105	10.3168	11.9329	11.6584	11.2107	11.0339	11.5525	10.4898	11.7831	9.88497	9.99188	11.2155	9.50384	10.6838	9.34442	11.2269	11.5945	9.6034	10.1794	10.8463	11.635	11.2065	9.70411	12.406	11.2805	12.225	10.4934	12.0703
FAM102B	3.03e-16	9.81125	9.55821	9.84051	9.6765	9.04975	9.41029	9.64206	9.96953	8.93865	10.2228	8.76394	10.2407	9.57163	9.51515	9.81931	10.3892	9.71024	9.87041	8.891	8.67017	9.75109	9.17139	9.3339	9.6458	9.66065	9.07597	10.5278	9.54888	9.91643	9.14115	9.39616	8.85001	9.88907	9.65217	10.3127	9.76458	9.24144	8.81363	9.93621	9.34726	9.52047	9.79672	9.17286	9.36464	9.8899	10.0477	9.39639	9.22312
SLC8A2	3.14e-16	8.26948	4.20683	7.23267	6.69611	6.44359	8.20614	4.7951	7.59318	5.60084	6.89634	5.99769	9.64441	5.06993	5.37062	9.05194	10.4129	5.88337	4.75733	5.32005	4.50196	5.90486	5.17042	4.2747	7.78156	4.68878	4.94937	8.33161	5.60952	5.95198	4.9103	6.06272	5.48294	4.25882	5.89712	10.571	3.97827	5.47985	5.00952	5.04719	4.53205	8.0014	4.51226	5.05002	5.61853	5.03316	7.19093	5.3153	5.22755
ITPKA	3.19e-16	6.70907	4.65317	4.87515	4.65597	4.4596	5.45575	4.01935	4.52322	5.52706	6.79324	5.91567	8.84039	4.78132	4.7932	8.45463	9.54064	5.54788	5.1851	6.6725	6.6334	3.43694	7.47249	4.83585	5.93901	4.79852	4.87709	8.37284	5.77984	6.75255	5.66125	4.6556	4.65393	5.26473	6.80225	9.737	5.1645	4.73819	4.2098	4.81183	5.11167	4.79934	3.43458	3.67922	5.8623	5.34834	7.31617	4.77144	6.76968
PTPRN	3.22e-16	8.19965	8.28454	8.51085	7.976	8.10606	8.12199	7.54022	8.52284	7.71503	8.01505	10.9264	9.83308	7.77078	7.87622	9.28386	10.3671	8.42222	7.46877	9.15355	8.36921	8.46102	8.06679	8.49398	8.57517	8.49675	7.69053	9.60632	8.34124	7.68852	8.47136	8.82697	8.54411	7.60053	8.50723	10.2388	7.91575	8.02801	8.355	8.24885	7.92455	7.98326	8.96173	8.43141	10.2973	7.95253	8.17702	8.51641	7.39984
BMP1	3.26e-16	7.17262	7.84216	7.60736	8.03526	7.32291	7.26059	7.84899	8.34458	8.2219	7.77928	7.53941	6.71116	7.94595	7.53745	6.53393	6.55551	7.93093	8.55133	7.54022	8.18836	7.6884	7.81064	7.65396	7.69441	8.01732	8.33	7.73349	8.18592	7.83794	7.86451	8.50638	8.04019	7.63146	7.32143	6.28758	7.6094	7.83258	8.52661	7.97348	7.9333	7.51974	8.53373	8.14423	8.2925	7.84497	7.47878	8.09602	7.76751
NEDD4	3.27e-16	8.29289	8.87369	8.05506	8.89774	7.75578	7.68299	9.10483	8.45887	8.76902	8.48127	9.17114	8.83172	8.64876	8.53058	7.80318	7.54221	9.32111	9.29018	7.49688	8.22384	7.7279	8.58262	9.23227	8.35962	7.95897	8.63458	8.38491	8.36269	8.41886	8.6681	8.13387	8.79064	8.49556	8.39548	7.04198	8.89018	8.90418	10.0951	9.21181	9.72277	8.3509	9.3851	8.91936	7.86465	8.92597	7.87694	8.40955	8.43287
LOC101928335	3.49e-16	6.73172	6.41433	6.99598	6.91904	7.33012	6.88605	7.12753	6.83795	6.42181	6.77345	7.07519	7.36477	6.86537	6.68237	6.71713	8.54233	6.88752	7.15606	7.20286	6.19219	7.08136	7.15836	7.40735	6.6781	6.91615	6.70759	7.32885	6.66274	7.30382	6.9994	6.78557	5.34085	7.27146	7.21162	8.54076	5.94797	7.07006	6.67505	6.96193	5.8019	6.90699	6.09598	7.02186	7.59837	6.5307	6.89743	6.87175	6.91107
FAM126B	3.52e-16	9.46194	8.9979	9.4236	8.8706	9.02678	9.18184	9.02049	8.76926	8.63904	9.15447	9.33622	9.81868	8.77398	8.74995	9.46933	10.4816	8.7737	8.732	8.81278	8.16229	9.09061	9.00022	8.60617	9.52723	9.0937	9.04225	10.3324	9.13272	9.07461	8.88789	8.21765	8.33176	9.02434	9.38134	10.0919	8.93764	9.04603	9.45956	8.96405	8.59225	9.28416	9.38032	8.69425	8.67793	8.58117	9.1553	8.82293	8.9002
TNC	3.53e-16	11.635	11.4151	11.5366	11.3149	10.4012	11.4013	11.3679	10.4178	11.3364	11.3231	9.90925	9.33086	11.1124	10.6186	8.7501	6.68803	10.9681	12.1771	11.0259	10.8267	10.8972	10.5374	10.6651	10.7761	10.5362	12.136	9.65261	11.41	11.6647	11.9743	11.2188	11.2886	9.67888	10.4934	8.40585	12.2313	12.2557	7.65604	12.3155	12.2468	11.936	11.7493	11.5344	11.6149	10.093	11.5616	11.3532	12.0282
MAPRE1	3.54e-16	11.9079	11.646	11.6993	12.4997	11.5388	11.8525	12.4772	12.217	12.0234	11.4605	12.1955	11.5779	11.3542	11.77	11.5247	10.5836	11.6445	12.0961	11.7375	11.9456	11.9711	11.8974	11.4292	11.713	11.7753	12.4529	11.2869	12.0527	11.6428	11.652	12.0601	12.141	12.3133	11.7672	10.4067	11.7998	12.2358	11.2753	11.6597	11.9313	11.6757	12.2494	12.3181	11.3571	11.9313	11.9202	12.0703	11.6067
ACTL6A	3.6e-16	10.5754	10.1299	10.0166	12.2799	10.085	10.1949	12.2109	10.9124	10.531	10.4347	10.0374	9.57565	10.4558	9.71505	9.81702	8.0194	10.2887	10.42	10.9412	11.641	10.5867	10.3215	10.2515	10.5533	10.2604	10.6488	9.51654	10.6112	10.5284	11.2083	9.12899	11.2701	10.0184	10.2723	8.12426	10.1307	10.5383	9.91365	10.4811	10.1114	10.262	10.5626	10.4816	10.0686	11.0668	10.1738	10.4227	10.729
E2F8	3.63e-16	7.48319	6.60801	6.3808	7.88329	5.75221	8.0249	8.51406	8.67086	7.53786	6.60753	5.70111	8.22395	7.73159	3.85455	6.12748	3.34362	7.19338	8.52092	6.96887	7.65744	6.8961	7.25744	7.36477	7.15684	7.45691	8.33694	6.25669	7.01353	8.21173	7.76134	7.24802	7.97867	7.2255	7.22064	5.33552	7.60506	8.67309	6.74829	7.73649	8.23306	6.97974	6.94642	8.34497	7.29329	7.66025	6.59051	7.74894	6.51571
STMN1	3.71e-16	8.64036	8.10176	9.33062	8.71743	9.60589	8.15376	9.10257	9.66317	8.50293	8.81847	8.08761	8.95103	8.32539	8.38383	9.49132	9.43084	8.04302	8.50231	7.93255	8.45979	9.52879	8.55397	7.32925	9.60396	9.84034	8.46464	8.99288	9.58882	9.27341	8.45858	8.28454	9.39815	9.06878	9.01933	9.83064	8.53979	8.68694	8.24447	9.11624	8.36241	9.08222	8.75543	8.66605	7.94738	9.65396	8.24131	7.48956	8.15131
CDK2	3.73e-16	8.9674	9.27486	7.74724	9.60952	8.05971	9.01162	9.3354	9.42668	8.98756	8.34951	7.49108	8.5196	8.90296	8.29481	6.92707	6.53223	8.19565	9.70469	8.24557	9.56502	8.49386	8.20639	8.69002	8.86529	8.4781	9.3652	7.9709	9.11125	9.17188	9.57251	9.57714	10.6171	10.5875	9.08009	6.53039	9.26638	9.4321	9.12927	10.1097	9.62208	8.83933	8.99525	8.9958	8.3388	9.73104	8.39893	9.09196	9.50791
MCM3	3.94e-16	10.8047	10.4525	9.72182	11.5719	9.99243	10.8157	11.6561	11.0019	10.5409	10.2162	9.83776	10.9386	10.3773	10.1509	9.48775	8.38699	10.5353	11.1161	10.0713	11.2409	10.0083	10.0264	10.5513	10.4979	10.3291	10.8239	9.68874	11.3786	10.0046	10.4887	10.9849	12.0998	10.9079	10.6021	9.18529	10.4399	11.0868	10.6364	10.4841	10.7242	10.8537	10.2195	10.7416	9.55409	10.9415	9.90413	10.6196	10.7537
SLC35F3	4.04e-16	6.53528	5.02332	7.40799	5.35644	5.16894	6.3264	4.79164	5.22309	4.79246	6.58675	5.11325	7.38656	4.42531	6.60404	7.22217	8.28727	5.7549	5.42525	6.00604	5.73413	5.45575	6.37662	5.09119	6.58782	5.82392	5.11621	7.70023	5.81804	5.82832	5.11963	4.02698	5.0723	5.97648	5.55063	7.34571	3.79259	4.06021	5.29289	6.77852	4.85122	6.37787	5.39915	6.16945	5.82225	5.41773	6.7375	5.06321	5.63456
MYO5A	4.06e-16	9.97341	8.79578	10.008	8.36393	9.32025	9.01438	8.6703	8.98659	8.94353	9.94194	9.72759	10.3355	8.69734	9.65109	10.2015	10.9849	9.42586	9.21097	8.81069	8.42522	9.23125	10.209	8.7009	10.1032	9.17617	9.21897	10.6877	9.67	9.93362	8.66741	9.03428	9.59589	9.75377	9.68658	11.0782	9.05647	8.69633	7.50602	8.96536	9.0692	9.69815	9.53071	8.86027	8.85774	9.11697	9.65612	8.15696	8.46871
CCDC92	4.07e-16	11.8765	10.4071	11.9594	10.5569	11.2308	11.0606	10.5284	10.865	10.3735	11.4992	11.3581	12.2941	10.8234	11.756	12.0036	12.4386	11.1582	10.7075	10.998	10.6395	10.4765	11.4926	11.0122	11.5112	11.5046	11.1234	12.5105	10.4615	11.1991	11.6496	11.1429	10.3468	12.1835	11.4263	12.4664	11.2577	9.98517	11.1669	11.2586	11.1653	11.6718	10.9599	10.7214	11.2164	10.9659	11.2474	10.4467	11.0796
SHFM1	4.21e-16	11.2789	11.421	10.8555	11.2645	11.7361	12.4471	11.5399	11.5923	11.4593	11.3149	10.9605	10.9124	11.9484	11.0852	11.0178	10.4249	11.5616	11.7888	11.9799	11.936	12.1912	11.2705	12.1187	11.6945	12.1933	11.8817	11.3122	12.1228	11.4935	12.1264	11.6844	12.2626	10.7247	11.7631	10.3794	12.1792	12.2735	11.4469	12.2004	12.3043	11.9456	10.886	11.6772	11.748	12.4109	11.9047	12.1303	11.7967
FOXM1	4.23e-16	8.4265	9.04947	5.14885	9.76188	5.09287	8.74619	9.44047	10.0423	8.52185	6.85404	4.35192	5.36197	8.65025	5.28456	5.40132	4.75519	6.93529	8.81497	7.23346	9.70315	8.52369	9.57945	7.9069	9.36554	10.4416	9.093	7.52529	8.33947	9.26758	7.95784	8.4986	9.61211	9.1553	9.5389	4.88226	9.26992	9.40889	4.74003	9.22909	9.5722	8.06912	6.58197	9.25249	6.99818	10.4843	8.35873	7.1154	6.87651
PLEKHA1	4.29e-16	10.0645	9.13321	10.6445	8.4576	11.0122	9.18043	9.06087	8.97562	8.82173	10.2781	8.88306	10.3884	8.96714	9.9859	10.5894	11.4727	8.97099	9.55486	8.99365	8.61955	9.96435	8.75137	8.64664	9.87041	9.71459	9.06906	10.5302	9.48791	9.92752	9.7848	9.91245	9.53153	9.81702	9.31751	11.5344	9.31195	9.84291	11.1357	9.60603	9.09689	9.73133	9.43677	9.3909	8.98102	9.13242	9.36554	9.51407	9.04736
CYP4X1	4.47e-16	7.86896	4.41274	7.5629	5.14913	7.03654	6.81315	4.45058	3.84427	5.69197	7.69349	5.61532	8.2121	6.06955	6.35805	7.85848	9.78834	6.52362	6.86583	6.27007	4.67975	5.34985	6.70456	5.26027	7.40842	6.59705	6.43624	9.10296	7.31693	7.66533	6.26549	5.25496	4.92576	5.61107	7.34079	9.64648	7.13083	3.20351	9.5878	5.91775	6.47744	7.28042	4.95549	6.31808	6.33473	6.06718	7.37866	6.4712	5.86423
SGIP1	4.52e-16	8.73933	6.91073	9.10411	6.56857	9.06705	7.79502	6.54328	7.3676	7.95546	8.97507	8.82235	8.7108	8.46925	7.86999	9.28166	9.80562	9.25857	7.80956	8.43157	6.41961	7.93855	9.40513	7.49296	8.33135	8.69558	7.25255	9.58462	8.20662	8.85789	8.69927	7.46574	7.34303	8.31368	7.56748	10.2074	7.8462	7.02904	7.14122	6.78423	6.72017	8.50823	8.82364	7.43053	7.93153	8.21936	9.22286	7.83284	7.20091
CDH9	4.58e-16	7.54482	6.83871	6.33585	6.51982	5.69125	6.52891	6.82848	5.06819	5.71867	7.16506	5.13985	7.04171	6.3188	4.9187	7.9365	7.75187	6.39171	5.93395	7.33138	5.16594	6.14884	6.18424	6.18763	6.91293	4.9042	7.07278	8.11717	6.71367	5.25835	7.12567	6.37219	4.89319	5.7082	6.59901	8.70422	4.84828	3.46336	5.01506	5.57332	5.36059	6.53241	6.54123	6.39913	5.7401	6.66593	6.9952	6.66742	4.8806
XRN2	4.78e-16	9.49886	10.3148	9.64058	10.679	9.4369	9.78834	10.757	10.3532	10.3347	9.3895	9.84135	9.42505	9.99574	9.98187	8.89206	9.16197	10.1783	10.4816	9.92386	10.137	10.2352	9.94463	10.1244	9.8157	9.72592	10.3425	9.22102	10.2586	10.1465	9.31167	10.424	10.403	8.97851	10.0523	8.58726	10.1262	10.4696	9.20022	10.0374	10.6112	9.60863	9.57056	10.741	9.22022	10.3611	9.81961	10.4183	10.1648
JAM2	4.81e-16	11.4392	11.3962	10.7431	11.2492	11.1477	10.1242	11.2291	10.9959	11.2409	10.8914	11.5885	10.7158	11.4301	11.7725	10.3291	9.99666	10.3755	11.2902	11.9268	10.8138	10.6646	11.1797	11.7619	10.904	11.0875	10.9992	10.4934	11.3042	11.0606	10.8093	10.9667	11.2943	10.6455	11.7416	10.171	11.8463	10.3874	12.5166	10.8	11.0976	11.2057	11.8135	11.4373	11.0898	10.9046	11.3581	11.171	12.2131
ITGB3BP	4.89e-16	9.61857	10.1746	9.58061	10.3563	9.03735	9.26931	10.3591	10.633	9.49413	10.4271	9.24538	9.84821	9.52265	8.93363	8.69198	9.87276	9.87194	9.96011	9.941	10.0014	10.4218	9.60223	10.1053	10.0244	9.81106	9.7858	9.81219	10.7173	9.97211	10.7484	10.0981	11.3214	9.72576	10.0719	9.19725	9.76649	10.1105	9.51713	10.1075	9.96435	10.0321	9.72229	9.99833	9.9036	10.5862	9.37948	10.0356	9.94774
MTMR7	4.92e-16	6.4971	5.316	7.22108	4.60624	6.52527	6.26989	4.94838	5.07731	6.20947	5.81396	6.25062	6.39097	5.82622	5.80067	7.45623	7.79223	6.30449	5.95259	6.0415	5.04291	5.87419	6.47097	6.03103	6.63029	6.54728	6.40509	7.15959	5.55265	6.1446	6.21748	5.88315	5.92176	6.4409	5.44401	7.41752	5.76226	5.32285	6.56963	5.59078	6.24035	5.70429	6.41504	5.50318	4.86559	5.8064	6.01428	5.25607	5.62005
RBP4	4.95e-16	7.46017	6.56751	5.23203	4.42531	6.34675	6.68589	3.95389	4.64763	3.93011	7.7979	4.1156	8.65198	5.62507	5.48431	8.47384	9.6397	6.94928	7.06215	5.11657	5.52867	3.21156	6.41408	3.6366	7.59721	3.67465	4.2526	8.41588	5.2772	7.41569	6.97879	4.17775	3.82906	6.72293	6.07422	9.12156	4.18071	5.06231	5.69197	5.25778	3.35316	6.43269	3.8003	4.05642	5.8042	4.14748	6.85302	5.66881	3.58536
MORC4	4.97e-16	8.47732	9.06891	8.60209	9.27723	8.64087	9.34875	9.08751	9.18458	9.23599	8.63077	8.74146	8.88573	9.35062	9.91229	8.71731	7.79749	9.03619	9.192	9.24144	10.0789	8.94285	8.99818	9.14379	8.60306	9.06361	9.11968	8.64242	8.91209	8.87578	9.37431	9.52206	9.70315	9.13059	9.13004	7.83734	9.81507	9.77306	10.1659	8.95776	9.37893	8.6526	8.78402	9.23697	8.72669	8.63093	8.85213	9.21909	9.04265
FAM19A1	4.99e-16	8.48453	3.66409	8.73904	2.57966	6.9157	8.12761	5.92841	5.37062	6.55041	8.56046	6.44135	9.84191	4.59569	7.20326	9.97481	11.0149	7.76448	5.32804	7.03356	4.84828	6.42065	7.79244	6.92014	8.69514	8.04916	3.23685	9.80952	7.59772	7.69068	6.03248	6.12547	5.89437	8.48782	7.85914	10.3177	6.00413	3.40647	7.05192	7.0289	6.27659	7.03548	5.4083	5.35805	7.28812	5.76522	7.53381	5.573	5.99387
KCNA4	5e-16	5.18329	3.87541	6.04696	4.66321	5.04656	6.23053	4.3069	5.39825	4.76569	4.49947	6.29934	5.40661	3.93114	3.98224	5.45396	6.75501	4.266	5.89382	3.83967	4.44311	5.06089	4.51314	4.99149	4.69183	5.92425	3.75486	6.66363	5.90828	5.04656	4.36113	7.11914	4.9775	6.74533	5.70059	6.29087	6.00799	4.71808	4.06677	4.67975	3.91633	4.23543	6.12044	3.15367	5.61415	4.45324	3.76045	5.46242	6.22678
NME4	5.1e-16	10.7227	11.057	10.0841	11.2501	9.92001	11.1822	10.8288	11.1961	11.5897	10.3166	11.4081	10.5745	11.081	10.566	10.2234	9.83134	10.6992	10.6231	11.8245	11.1893	10.6893	10.9765	11.4013	10.582	10.6231	11.1637	10.6332	11.3176	11.2301	11.6445	11.2696	11.1734	10.868	11.2662	10.5673	10.8463	10.2186	9.24224	10.2654	10.8044	10.9653	11.6757	11.062	11.3922	11.128	11.0033	11.089	11.1492
ZNF558	5.15e-16	9.99	10.324	9.67826	10.7371	9.8228	10.2872	10.8256	9.78905	10.6278	10.3994	9.72978	9.15656	10.3389	10.0863	9.52308	9.34875	9.92619	9.94985	10.5175	10.5358	9.82728	10.7606	10.4314	9.89991	9.94822	10.53	9.16154	10.4071	10.2415	10.9771	10.7237	10.4379	10.3967	9.89055	9.13296	10.128	10.2901	9.61873	10.5035	10.8716	10.1931	10.1497	10.5051	9.81669	10.2982	10.4107	10.7002	10.6092
TESPA1	5.29e-16	6.25705	6.64479	7.49395	5.83205	6.41563	6.27484	6.39874	6.54811	4.30009	6.51685	4.38542	8.61485	6.38595	5.89037	8.15781	10.1352	6.02233	6.32854	6.17635	6.65692	5.78658	6.44933	6.30512	7.23897	6.66513	6.5762	8.53916	5.98676	6.97506	7.42367	6.2378	5.65879	6.23821	6.82212	9.55054	6.2789	6.59255	5.4953	6.48141	6.39874	7.14963	6.00759	6.28464	6.25343	5.69849	6.4778	5.3256	6.37737
APBB1	5.42e-16	9.89796	9.05128	10.226	9.02142	10.3497	9.4356	8.87333	10.1114	9.37235	9.87663	9.67888	10.586	9.44925	10.0388	10.6425	10.7581	9.82616	8.62862	9.27751	9.81931	9.72338	9.70957	9.62456	9.3136	9.16306	9.10509	9.97796	8.96267	9.67711	9.62569	8.98454	8.0066	9.41793	9.67871	11.062	8.98987	9.72819	9.09522	8.69309	9.19891	10.0958	8.49422	8.56113	9.84725	9.75377	9.9549	8.68903	9.59574
TMX1	5.64e-16	11.6634	11.8809	11.3416	12.0795	11.3287	11.6623	12.1187	11.2357	11.623	11.0059	11.744	11.3122	11.8121	11.2269	10.78	9.98627	11.3733	11.6671	11.7925	11.5112	11.5237	11.728	11.9173	11.0914	11.0768	11.5897	10.7078	11.8463	11.7031	9.98517	11.4191	11.3865	11.6017	11.0744	10.0008	11.314	11.6385	10.0885	11.1953	11.5993	11.2653	11.4479	11.9218	11.1169	11.5719	11.2308	11.8274	12.2799
NID1	6.12e-16	8.62301	10.6021	10.5616	10.8199	9.28523	9.37517	10.5852	9.79253	9.85918	10.3972	7.89317	8.93486	9.84418	9.21504	8.14507	6.96642	8.33585	10.7339	8.78086	10.2216	8.89088	10.0208	8.84799	8.74119	10.1136	10.4503	10.4144	9.99763	9.79772	8.95527	9.44806	10.0563	9.89397	9.37146	6.90772	9.42911	10.5959	11.2542	9.38898	9.68842	9.60496	9.85327	10.4375	9.28493	8.83157	8.26225	10.7853	9.2357
SERPINH1	6.39e-16	9.03866	11.1447	9.85374	11.2155	8.94527	9.89433	11.2595	9.44567	10.3874	10.4596	4.92013	5.37745	11.5449	6.52566	4.67645	4.34678	9.24623	12.3884	10.2305	11.3795	9.34793	8.27567	10.983	8.57517	8.07683	11.2824	9.96219	9.55251	9.55909	9.44838	9.66921	9.43412	7.8064	9.88127	3.81048	9.62016	10.5899	10.9537	10.053	11.7093	9.49442	8.95261	9.87229	9.99439	8.08927	9.33455	11.7241	10.478
FKBP10	6.47e-16	8.36775	9.85067	8.1375	10.7296	7.16775	9.28732	10.4298	9.58309	10.2984	9.23908	9.08983	8.35333	9.71855	9.13047	5.74937	4.2526	9.00262	9.91169	9.98865	9.94666	8.79052	9.25441	9.75408	9.29959	8.46345	10.2	8.85409	9.51515	9.39497	8.25014	10.1047	9.0464	9.54545	9.76236	4.25882	9.68976	8.27581	8.71022	10.355	9.38579	9.72352	7.77661	10.3324	8.65392	4.0259	9.38666	9.86203	9.62832
HS3ST2	6.56e-16	9.68814	8.04559	8.75828	7.55226	8.50053	9.79913	7.54022	7.56322	7.74954	8.80872	8.53794	9.19083	7.79412	8.52104	8.78115	10.0255	9.22125	8.81389	9.0698	7.87398	8.20991	9.10269	7.75087	9.34247	7.9121	7.73864	10.1915	8.86147	8.72908	8.53993	8.19096	7.62467	7.75538	8.4861	10.4948	7.82695	8.34384	7.84202	7.44275	7.57081	8.70882	7.57179	7.75498	9.13004	8.71055	9.21378	7.8212	7.4146
CACNA1C	6.57e-16	8.19413	7.10554	7.94907	6.68479	7.63286	7.32259	6.80367	6.48207	7.37156	7.95194	7.62306	7.94192	6.81521	7.40935	7.95962	9.09091	7.5574	7.88254	7.39029	6.81708	7.58042	7.43505	6.82127	7.61457	8.73107	6.98288	8.64876	7.40356	7.29221	8.55904	6.82454	7.62895	7.56599	7.79666	9.17561	8.20587	7.10688	8.29469	6.9707	8.14016	7.80118	8.35901	7.13651	7.4447	7.42955	7.89406	7.85746	8.17166
AACS	6.67e-16	9.75977	9.13491	9.5918	9.49472	9.16365	9.77136	9.40617	9.95694	9.73207	9.45107	9.29739	10.1961	9.65344	9.16789	9.83902	10.7431	9.9144	9.47247	10.4232	9.44181	10.2507	9.54604	9.41185	9.73623	9.47188	9.45983	10.2597	9.41366	9.27316	9.04666	9.8962	9.96048	10.5527	9.57265	10.7777	9.42284	9.57109	10.2582	10.1284	9.60085	9.36944	9.07997	8.8263	9.62817	9.30721	9.28438	9.52863	9.26184
NTN1	6.69e-16	8.46331	9.79706	8.52701	8.5561	8.23534	7.59108	8.52296	8.40228	8.29148	9.36383	9.56915	8.05482	8.85013	8.90765	8.12465	7.60296	8.34318	8.11583	7.90786	9.36944	7.67663	8.70904	8.46491	9.297	8.70344	9.56793	8.22384	8.21443	8.70953	8.34793	9.34744	9.20305	9.73407	9.01627	7.55502	9.28877	8.81352	10.1478	10.0243	10.128	7.87443	9.51033	9.60815	9.21812	9.55225	9.13916	8.79368	9.23824
MMD	6.86e-16	10.4829	10.4863	10.7366	9.52481	10.1853	10.524	9.62849	11.089	9.32287	10.5415	9.46037	10.3751	10.2268	10.5533	10.6217	10.5757	10.4976	10.7168	9.83035	10.119	10.1532	9.83577	10.133	10.4399	10.3666	9.86542	10.6926	10.2094	10.6211	9.22412	9.95957	10.7195	10.1738	9.31491	10.9586	9.9532	9.95694	8.47195	10.5185	10.4192	10.0631	10.7068	10.1276	10.9751	10.6206	10.6226	10.3228	9.83667
RAB3A	6.93e-16	9.80254	8.15528	9.4056	7.59797	9.03896	9.12766	8.22343	6.33943	6.15785	9.15212	7.36579	11.0674	7.71789	6.18493	10.1625	11.1593	9.24824	6.84391	6.59337	9.18894	7.75718	8.5764	7.33056	8.87941	8.44714	7.97585	10.1082	8.37362	8.69581	7.20701	7.07052	5.64451	8.07683	7.93341	11.364	7.04266	8.8362	7.01134	7.20594	5.46277	9.76524	8.84424	7.60882	9.18867	7.74276	8.76523	7.53888	7.88904
PCP4L1	6.94e-16	7.68339	6.86359	8.08666	6.90078	6.9637	7.77938	6.11279	6.77376	6.65557	8.61775	7.54899	8.07712	7.01797	6.82964	8.34113	8.89152	7.37521	6.96744	7.47797	6.81052	5.98353	7.43878	7.19617	7.3521	7.19076	6.683	9.25524	7.90269	7.08325	6.97651	6.1688	6.43586	6.4735	8.1733	9.51569	6.69189	6.69365	3.35719	6.14404	6.19619	7.58531	6.30674	6.13541	7.08666	6.40086	7.70679	6.42592	6.51104
GBP1	7.07e-16	11.3715	11.2798	10.1995	9.6403	10.9586	11.292	9.74146	9.82936	9.3784	10.2355	8.33283	10.3488	11.4544	9.45915	7.79849	6.61842	10.9296	11.8899	10.7565	11.7575	9.43508	8.32387	10.2143	9.47681	8.95624	12.115	10.4765	10.0378	9.81387	12.2918	11.3608	10.6963	9.20529	10.6774	6.74459	10.9303	10.479	9.56383	9.96758	10.4553	10.9353	10.8058	9.59088	11.7053	10.0491	10.8093	10.5513	11.1926
FLJ35934	7.26e-16	7.45348	7.41499	6.91055	7.91346	7.34598	7.63097	7.9484	7.66517	7.74209	6.8496	7.48805	7.95897	7.66896	6.63859	6.92468	5.93993	7.2093	7.32998	7.61961	7.57895	7.3341	6.82345	7.12923	7.19093	7.84297	7.37391	7.13761	7.56664	7.35373	8.73036	7.01537	8.29958	7.73622	7.31245	7.39864	5.36236	8.07409	7.44608	6.83753	6.596	7.24639	6.53572	7.62549	7.307	5.9555	6.19149	7.82234	7.06436
PRRG3	7.32e-16	7.82682	7.15114	7.63135	6.36948	6.97477	7.5205	6.55606	7.2947	7.18971	7.29153	7.25159	8.29944	7.50045	6.30834	7.98592	9.07461	7.2205	7.08841	7.48093	7.85334	7.64586	7.11373	8.31844	7.25134	7.59931	7.2205	8.19071	7.38923	7.20104	7.47511	5.68812	7.48927	7.50104	8.79689	8.86605	6.94658	8.42522	7.30826	6.92978	7.21586	7.56528	6.7864	7.06163	7.44021	5.97227	7.05802	7.08297	6.85063
PRSS2	7.34e-16	7.22315	6.27049	7.38864	5.71466	7.22341	7.30557	6.43406	6.38955	5.56939	6.67487	6.4255	7.46924	6.03085	6.58958	7.24484	7.47443	6.88324	5.80103	6.70875	7.2537	6.03931	6.84615	5.4752	7.03799	6.37804	6.82092	7.35858	7.43755	6.83647	6.54386	6.6383	6.48207	5.6156	7.08551	8.05683	6.19504	6.28613	6.81759	5.66211	6.29591	6.897	5.98963	5.90454	7.03669	6.38097	6.89743	6.62559	6.36235
KIF4A	7.39e-16	8.61129	8.88547	7.47839	9.48142	6.75961	9.22326	9.64119	10.3539	8.60273	7.70235	7.04433	9.29811	8.73836	7.24605	5.24942	2.79442	10.1403	9.58688	7.39092	9.99735	8.41384	9.47113	8.68502	8.76086	9.80347	8.89735	8.15746	9.25383	9.74731	8.82364	9.83134	10.1474	9.77598	9.72213	3.19936	8.97987	10.3853	7.09935	9.16584	9.03787	8.18017	7.75334	8.99105	7.97219	10.0438	7.37103	8.30559	7.92974
GARNL3	7.5e-16	8.66692	7.84521	8.56359	8.20587	8.28915	8.47009	8.14573	7.59422	7.27446	8.24315	8.53249	8.63458	7.16956	8.04823	8.77581	9.69191	8.30111	7.28677	8.04259	7.71558	8.31238	7.75623	7.178	8.29679	8.5172	8.01491	8.98188	8.02692	8.59993	8.85489	7.41695	7.9503	8.38087	8.17645	9.72338	7.90576	7.71051	8.14208	8.51563	8.35489	8.01983	8.21545	7.73134	7.57081	7.9503	8.16446	8.12992	8.61996
PI4KA	7.5e-16	10.5846	9.13864	9.87696	10.5479	10.0355	10.3261	10.8325	9.06154	9.9292	10.7232	10.1252	11.9345	10.0834	10.2271	11.1719	11.947	10.2531	9.5382	10.2934	9.75062	10.3769	10.8749	9.82842	10.8132	9.6329	9.92949	11.8093	10.0149	10.6982	9.73846	9.26758	10.1341	10.083	10.2681	12.0095	10.7111	9.83134	9.52467	11.1646	10.2494	10.6077	10.2269	9.03941	9.42533	10.1208	10.6257	8.884	10.4919
SYP	7.77e-16	8.57792	7.26272	8.29828	8.3908	7.37866	8.63034	7.4994	8.01667	7.79579	6.83282	9.15237	10.119	6.811	7.71833	9.64266	10.4664	7.80693	6.24274	8.41372	7.8477	6.17569	8.13079	7.21694	8.08993	7.23195	6.56141	9.96922	8.28077	7.90609	7.39542	7.99709	6.9616	7.93383	8.13553	10.8024	7.57047	7.98434	5.33367	7.54899	6.05904	8.21674	7.78249	7.36991	8.20556	7.19032	8.39717	7.04064	7.72029
RNF213	7.78e-16	8.67076	9.45808	8.77843	8.7139	9.6403	8.41478	8.93363	8.31897	8.0991	8.86906	8.18672	8.68976	8.60721	9.19323	8.3701	7.4345	8.43498	8.31473	8.25365	9.03164	8.12897	8.19034	8.20307	8.82938	8.51983	8.7685	8.77636	7.85634	8.57979	8.82967	8.64277	8.54818	9.92103	8.39239	7.72576	8.7801	9.06306	9.30523	8.78588	8.76382	8.6285	8.61315	8.49366	9.00871	8.43434	9.14321	8.17292	8.33825
HJURP	7.81e-16	8.28053	8.99055	6.73318	9.94463	4.74179	8.73292	9.7035	9.4011	8.21674	7.21308	4.01308	8.54988	8.3977	6.08447	5.45396	5.98134	7.81788	8.54564	8.06872	8.05358	9.12953	9.03373	7.68406	9.32412	9.18085	9.65987	7.47933	8.87381	8.93704	9.11999	9.07214	9.91334	9.62746	9.26431	5.82929	8.30258	8.8542	7.4984	9.65356	8.90094	8.42702	6.90954	9.75977	6.58605	9.68134	7.41556	7.72148	8.01039
PFN1	8.01e-16	12.9051	13.1503	12.9852	13.2409	12.4997	12.8736	13.1622	12.6471	13.089	12.9402	12.2906	12.7642	13.1622	12.5502	12.0148	11.7186	12.9197	13.3298	12.8373	13.5369	12.7018	12.6227	13.0083	12.7018	12.2268	13.3406	12.5967	12.9816	13.0591	12.1792	12.705	12.7952	12.834	12.7642	11.5616	12.9852	13.5	12.7682	12.6429	13.3942	12.9898	13.2342	13.0083	13.1622	13.3607	12.9098	13.2342	12.9098
RASGRF1	8.13e-16	7.07266	7.00055	8.02477	7.19424	7.49542	7.31123	6.68085	7.01735	7.6855	6.64512	8.04098	7.82514	6.37514	6.95511	7.79097	8.33513	6.80845	6.57361	7.15015	6.58301	7.07278	6.84374	6.84408	7.01441	7.0048	6.66816	7.14796	7.00338	7.08841	6.35706	6.79358	7.30078	6.72768	7.24853	8.51997	6.87515	5.94259	6.91934	6.74892	6.71622	7.15047	6.54123	6.84978	6.42271	6.68034	7.72471	6.37312	6.92707
DAP	8.17e-16	10.0141	10.8261	9.88329	10.1963	9.82044	10.0127	10.4802	11.2869	10.5639	9.87341	9.64181	9.84034	10.7975	10.0518	9.22934	9.38414	11.1218	10.9316	10.9425	11.1507	9.93228	10.1772	10.7709	9.57163	10.2727	10.2802	10.2597	10.6976	10.2941	10.2675	10.0865	10.6278	10.1178	9.47724	8.97239	11.4031	10.7306	10.3389	9.93312	10.6669	10.403	10.5574	10.8011	10.5518	10.4571	11.0348	10.571	10.8211
SOX9	8.44e-16	13.1346	12.9051	12.3017	13.5595	13.2342	12.8577	13.3475	11.6757	13.5442	13.4572	12.2965	13.8568	13.2865	13.0537	11.8135	11.4236	12.3492	11.1016	12.4109	12.7222	11.5486	12.9852	12.748	11.7967	13.2474	13.4847	12.3133	12.4365	13.3804	13.9403	13.8995	13.023	12.7018	13.6818	11.6508	12.9237	13.9934	9.61598	13.275	13.4293	13.2175	13.2865	13.5746	13.0432	13.0839	13.1782	12.9497	12.1686
GLT1D1	8.47e-16	6.93736	7.57881	8.00114	5.82156	3.85631	5.46277	3.60223	4.86342	5.94898	7.20788	3.57585	8.67693	4.30988	6.06168	7.2405	9.75207	5.63721	4.91816	6.17541	4.86388	3.11017	3.83967	6.08746	7.21537	5.56909	3.33628	8.67394	7.29839	7.4683	3.92114	5.74197	4.58698	7.0413	6.31792	9.62146	6.01776	5.99387	8.79893	5.83737	5.08292	7.10068	4.40243	6.90788	3.46153	3.63213	7.02226	4.69139	4.65799
TGFB1I1	8.5e-16	9.98274	10.6046	10.0623	10.3661	9.24524	9.72978	10.5624	9.27111	10.4361	10.6806	9.45268	8.63034	10.3892	8.45843	8.7162	8.16252	9.64487	11.3855	8.60114	10.9579	9.82221	9.29346	11.0782	9.84383	8.84215	11.7631	9.0788	10.5579	10.112	11.2671	9.89563	10.2411	10.2507	9.34818	7.68668	10.0225	10.2321	10.7915	10.1456	11.0682	9.87209	11.256	10.4678	10.0137	10.4491	8.14628	11.1555	10.3509
ARPP21	8.52e-16	8.12521	6.98658	7.63698	6.94354	6.59067	7.26491	6.93723	7.47954	6.17331	7.65604	8.18292	8.44857	6.56029	6.75646	9.05328	9.95972	7.34614	6.77137	7.28789	5.52369	7.14207	7.57047	6.17448	8.10155	7.74699	6.8607	8.81736	7.47018	7.57047	6.23977	6.26611	6.9707	7.46603	7.15125	9.454	6.03843	5.3986	6.07504	7.54077	6.47368	7.42527	7.03025	6.922	6.71043	7.1004	7.6707	6.23402	3.66153
N4BP2	8.57e-16	8.90007	7.28747	7.51052	9.34083	8.47384	9.04789	9.57191	8.87281	9.09196	8.64087	9.61584	8.22762	8.86305	9.24327	7.69959	6.86625	7.92182	9.05235	7.78936	8.38138	8.25897	8.30609	9.01716	9.12978	8.87851	8.71692	7.97837	9.22693	9.0625	9.19644	8.32387	9.06005	8.69659	9.11547	7.48437	8.83504	8.73304	7.92094	8.80961	8.79987	9.25496	8.92678	8.07893	8.15093	8.22281	8.77541	8.46705	7.98109
KIAA0319	8.64e-16	8.73933	4.46497	7.60478	6.1079	7.58999	7.905	6.86568	6.916	5.96777	7.28995	6.53442	8.60051	4.60416	7.3805	8.44965	9.47667	8.61853	7.61701	7.13556	4.9979	4.47221	7.27344	5.11167	7.83163	4.7091	5.42949	8.48534	7.10437	6.44532	7.60624	6.13592	7.52385	4.67235	7.50435	9.84888	6.48022	5.8031	4.46667	6.11429	5.91997	7.93667	6.27507	6.14831	6.94531	5.34196	7.79126	7.49555	7.17495
CTC-471C19.1	8.7e-16	6.02861	3.33469	5.9253	4.06297	4.38218	5.11167	3.0701	3.866	4.16176	2.69811	3.68749	4.21274	3.1212	3.72992	5.48449	6.60753	5.72166	3.59324	4.32893	3.97863	3.71818	4.43583	4.69767	3.93771	5.43438	5.20759	6.58344	3.17938	3.86761	3.89787	4.07513	2.75805	4.75807	4.23994	4.24186	4.19117	4.98281	3.62391	4.0711	4.10094	3.64043	4.20022	5.94952	3.75355	2.29109	3.50031	4.04013	4.19799
KLHL2	8.77e-16	11.4794	10.1381	11.8304	9.26836	12.0076	10.7004	9.35618	10.2139	10.0505	11.4794	10.4848	11.5293	10.2995	11.1007	11.8957	12.488	11.4342	10.652	10.6231	10.3722	10.3083	11.2635	10.9187	11.3552	10.7636	10.0512	11.7725	10.7015	10.8816	8.81389	8.10176	10.3359	9.71647	10.1818	12.2688	9.73608	9.59088	10.9501	9.33622	10.1032	11.0107	9.82221	10.2344	11.3818	10.1116	10.9892	10.3139	9.52821
LPCAT4	8.85e-16	7.31151	6.94227	7.62759	7.17616	7.02452	6.49997	7.64981	6.85389	7.48016	7.54454	7.81123	8.4419	7.5629	6.67487	7.83306	8.98634	7.28614	7.70512	6.86927	6.27994	6.8595	7.3575	7.54615	7.17559	6.56805	7.41499	8.09602	7.65871	7.17728	7.17537	6.98812	6.75354	7.31731	7.29112	9.23155	7.07229	7.22082	7.88077	8.23072	7.27135	7.74219	7.32368	7.02114	6.72569	7.81556	7.6884	6.96193	7.58442
TCF3	8.86e-16	7.52557	8.76663	7.65024	9.95392	7.83967	8.97863	9.64884	8.8163	9.35092	8.43361	8.19252	7.94934	8.81017	7.93766	7.65053	7.43812	7.85875	8.92116	8.40448	8.68195	8.22281	8.66301	8.8976	8.51696	8.69581	9.181	7.51364	8.79122	8.72832	9.01822	9.99997	8.49411	8.79146	8.88876	7.41381	8.81017	9.5965	8.47092	9.13217	8.73485	8.73978	9.01909	8.87115	8.31313	9.12738	8.45051	8.73122	8.5958
SYNPR	9.22e-16	10.307	6.84673	9.49243	8.5843	8.71969	9.16422	8.20414	6.84897	7.07266	10.6441	7.83779	11.5002	7.06249	8.06742	11.292	12.8136	9.31738	7.24444	9.43508	8.60575	7.75718	8.95514	4.58474	10.5209	8.41533	7.71376	11.8601	9.09675	9.18514	7.36463	6.59571	7.46777	7.26581	9.68505	12.8256	7.43305	6.79563	7.49612	6.41584	7.81953	9.24623	7.24995	7.63712	7.90069	7.53472	8.66161	7.93437	6.74442
SLC25A22	9.31e-16	9.34417	8.91002	9.00262	8.98587	8.37654	9.42826	9.05169	9.40849	9.38788	8.97017	9.2349	10.3846	8.41361	8.57879	9.46759	10.1892	8.98278	8.79469	8.9246	9.05328	9.35346	9.05353	9.16801	9.43508	8.6988	8.93243	9.59139	9.01222	9.44646	8.9962	9.15435	8.63228	9.61983	9.58431	10.2876	8.82211	9.68563	8.64652	9.16016	9.22742	9.41724	8.90175	8.78641	9.25857	9.03787	9.48879	8.5019	9.34027
C1orf95	9.42e-16	9.35573	8.75974	7.77734	6.35552	7.92536	8.73866	7.44722	6.56105	6.97846	8.36788	8.31806	9.69191	8.79229	7.89708	10.181	10.5443	9.95085	8.06303	7.87012	7.61322	7.97061	8.91209	7.5234	9.8106	9.0403	8.36254	9.20408	7.51352	9.10483	7.59797	8.66057	7.23953	6.98742	9.67015	10.9334	7.52582	7.24995	6.04679	8.86232	6.97163	8.30233	7.62128	7.10656	8.07529	7.82741	9.79117	6.72353	7.16685
PRPH2	9.54e-16	8.31733	7.72407	8.68397	7.89541	7.85707	8.62549	8.09552	7.85131	8.42014	8.19749	8.0323	8.59039	8.45023	7.97487	8.70344	9.18622	9.25701	8.52544	8.23592	7.97867	8.36269	8.59153	8.20917	8.72603	8.43895	8.37882	9.29401	7.87939	8.17758	8.5274	7.80531	8.32232	8.55365	7.93711	9.21726	7.97247	8.3804	9.38551	8.38557	8.31013	8.50929	8.53563	7.81234	8.93818	8.00202	8.35039	8.36519	8.1137
SYN1	9.65e-16	10.7618	8.12272	9.6973	8.01373	8.76444	10.2892	7.21728	8.78188	8.13936	10.0274	9.96997	11.3687	8.01704	8.493	10.4863	12.1749	9.58462	8.21518	8.71731	9.25575	8.57667	10.0798	8.22596	10.4161	8.72642	8.08311	11.7493	9.96538	9.50554	8.71284	8.84545	8.01983	8.80645	9.96699	11.9799	8.22891	8.54638	7.8366	7.47989	8.15001	9.90155	8.39663	7.94713	9.16948	7.32925	9.8324	8.55172	7.93082
CDK1	9.75e-16	8.8046	9.13161	7.37825	10.0416	6.2646	9.40763	9.74672	10.2043	8.39878	8.23098	7.40723	8.92571	9.2075	7.32734	6.73779	6.26264	8.48012	9.40152	8.5172	9.44047	9.27517	9.35867	8.69347	9.28057	9.32881	9.61315	7.89301	10.1664	9.71916	9.25989	9.21671	10.9843	9.87978	9.59912	6.25078	9.43819	9.85935	7.3399	9.64711	9.30808	8.84558	8.44549	9.7947	7.10937	10.6081	8.69296	9.00129	8.17832
HOOK1	9.82e-16	7.14021	6.27694	7.02358	5.33398	6.53867	6.82785	5.19527	4.37846	6.2559	7.15477	6.18763	7.93466	5.64528	5.88269	7.69959	9.21378	7.02962	5.04179	6.64002	5.47835	5.88832	6.89409	5.96869	7.05405	5.81085	6.30902	8.54209	6.68067	6.8011	5.23171	6.23941	6.23072	6.49864	6.85601	8.92678	6.2757	7.02418	6.07608	6.22287	6.30834	7.28732	5.88478	5.9697	7.307	3.29793	7.01511	5.66881	6.10133
CMTM6	1e-15	10.3054	10.8415	10.5007	11.0661	10.234	10.4192	11.0363	10.848	10.5378	10.7002	9.61185	9.58356	10.803	10.5117	9.51597	8.29897	10.6996	10.8934	10.1028	9.96323	10.238	10.1548	10.514	10.662	10.4669	10.514	10.5002	10.3351	10.618	9.70757	9.73846	10.7504	10.3695	10.537	8.31072	10.581	10.504	11.0992	10.7023	10.7756	10.2268	10.2103	10.7624	10.8087	10.4236	10.6662	10.7733	10.4624
CHD5	1.01e-15	8.36519	6.28244	7.48481	6.15716	7.41047	7.53941	5.8675	6.20564	5.62995	8.15054	7.02015	9.26638	5.30269	6.7152	8.7511	9.77076	7.33068	6.26187	6.74806	6.18813	6.02679	7.48249	5.04445	7.86204	6.99673	5.5427	9.0558	7.34697	7.75424	6.431	6.35002	6.47385	6.34063	8.15734	10.0719	7.32779	6.14205	6.79598	7.54309	6.60218	7.71542	7.28157	6.30081	7.09631	7.46453	8.16526	6.16393	6.95165
KIF18A	1.01e-15	7.33026	7.81106	6.36595	8.19977	6.22267	7.90914	8.55067	8.62192	7.37731	6.40152	5.67541	8.05264	7.53929	5.30911	5.64968	5.48123	8.17911	8.2936	6.99759	7.43277	7.74821	8.26384	7.48726	7.9418	7.89422	7.75679	7.34114	7.52079	8.16105	7.30394	7.74396	8.03443	7.67399	7.68788	6.11556	7.20662	8.79469	5.72224	8.23163	8.0131	7.58896	6.75368	8.08871	4.346	8.73256	6.64411	7.31513	7.05166
THEMIS	1.04e-15	6.72843	5.62778	6.69925	4.06836	5.77554	6.3471	5.52471	3.00195	5.03251	5.92045	5.83111	6.61717	4.91124	6.2757	6.10151	8.06369	6.34416	5.90719	4.91472	4.92013	6.32086	6.01202	2.55404	6.56407	4.53927	3.10523	7.79553	6.17997	6.07441	5.37123	5.53259	5.69629	4.38582	3.21677	8.52634	5.50946	5.78547	6.32758	4.98667	5.33552	6.44057	5.38158	5.60084	4.85979	5.68592	6.77501	6.21688	5.25102
STXBP1	1.04e-15	12.4312	10.3451	12.1644	10.0915	10.9905	11.9202	10.4168	11.3364	10.7051	12.4386	12.3583	13.2808	9.69627	10.7681	12.7303	13.8655	11.744	10.2723	11.5555	11.0578	12.0442	11.5258	9.27172	12.9197	11.7925	11.2671	13.5907	12.1187	11.7925	11.4253	9.81537	11.261	11.728	12.3659	13.8291	10.5025	11.1628	11.0466	11.9867	10.4407	11.9729	11.3248	10.2212	10.825	10.355	11.8332	10.4673	11.071
TPX2	1.05e-15	9.85745	9.89228	8.12426	11.6561	7.79234	10.1007	11.3248	11.3902	9.96068	8.66333	8.12813	10.5974	9.64622	7.98355	7.88519	5.65489	9.24682	10.2694	9.36203	10.9646	9.80254	10.1754	8.80557	10.3114	10.105	10.9034	8.93575	10.779	10.5438	10.1334	11.032	11.2902	10.6496	10.6107	7.73636	9.8106	10.807	8.06591	10.4205	10.642	9.50872	9.07141	11.0999	8.84399	11.0066	8.7685	9.75279	9.29151
SYNE2	1.05e-15	8.68224	8.62977	8.0094	8.72486	8.11955	8.82671	9.02816	8.01285	8.82776	8.10379	9.17161	8.62452	8.46517	7.7968	8.13437	7.30909	7.73622	8.23894	8.6793	8.4674	8.59252	9.53759	8.03841	8.53676	8.87176	9.12074	7.85227	9.11894	7.80404	8.45373	9.2737	8.76557	8.86661	8.30532	7.38198	8.89451	8.55595	9.13242	9.0839	8.60747	9.03178	8.98609	8.41666	7.93466	8.47195	7.64266	8.48768	8.73811
IKBKB	1.07e-15	9.35808	9.12074	8.98376	9.20671	9.34614	8.96893	9.31052	9.31546	9.50804	9.30749	8.87826	8.78512	9.65459	9.15036	8.8129	7.74967	9.27873	9.75077	9.1807	8.61651	9.07072	9.49814	9.47711	9.37948	9.69538	9.20778	8.72082	9.04265	9.09689	9.46842	9.01881	9.91626	9.74411	8.98659	8.01247	9.41409	8.74719	9.42616	9.21428	9.92781	9.34218	9.31412	9.73557	9.00938	9.31108	9.51432	9.30496	9.92553
PLEKHG2	1.07e-15	8.37427	9.1505	8.97074	9.57825	8.68088	8.56954	9.77719	9.14345	9.88861	9.44366	9.11166	8.67003	9.33798	8.51392	8.53165	8.18117	8.84385	9.42937	8.60286	9.58091	9.49148	8.52339	8.80327	9.75348	9.15475	9.95872	8.40805	9.37221	9.09333	8.90926	9.85576	9.75677	9.20694	9.37465	8.52766	8.42571	9.47593	9.46068	9.53729	9.21871	8.94259	9.31137	8.88438	8.90793	9.64954	9.2924	8.96665	8.52829
PSD3	1.1e-15	10.9878	8.27851	10.3081	9.43084	10.3728	10.5424	9.96538	9.16838	9.51999	10.7955	10.3261	11.3827	9.80826	9.50005	11.0796	12.4084	10.4741	10.2469	9.37796	9.85004	10.1288	9.67051	9.44047	11.2551	10.5979	9.72034	11.6385	10.303	10.679	9.98663	10.9765	9.62984	10.5731	9.55965	11.7532	9.29615	10.471	8.49953	10.7981	8.67526	10.3936	9.29536	9.76687	9.58518	9.95151	10.442	10.0004	9.16849
COL26A1	1.1e-15	4.61041	4.82906	5.91775	4.20201	4.35013	5.16791	5.09323	5.39512	3.90762	4.6807	4.55106	5.64675	4.40521	5.64083	6.46648	7.19032	4.45537	4.00258	4.68379	5.21002	6.46458	5.27967	4.17676	6.39598	5.38693	5.9253	6.11508	4.67255	5.05756	4.13429	4.28478	4.29526	4.82906	6.03914	6.39153	4.40031	4.2182	6.11632	6.29917	3.80255	4.65479	5.31392	4.02308	4.73298	4.88257	4.56845	5.83387	4.59023
ZNF540	1.11e-15	7.96485	7.03371	8.09714	6.70546	8.30653	7.69281	7.95123	7.28253	7.52104	7.83724	7.94581	8.26831	7.53689	7.70166	8.39239	9.59372	7.70439	7.27849	8.08813	7.24399	8.04071	8.08542	7.52104	8.08882	7.76052	6.99173	8.6363	7.63286	7.80602	7.72148	7.94991	7.09434	7.2249	7.65769	9.0468	7.58884	6.91149	8.50459	7.92735	8.00521	7.82885	6.82067	7.37429	7.0713	7.72115	7.80531	7.22749	7.76701
CLDN10	1.12e-15	10.2475	9.51242	9.41985	9.50762	8.98987	10.2001	9.42573	9.43294	9.17532	9.73715	8.05584	10.4161	10.514	9.93416	10.2595	10.7815	9.77413	9.11045	9.51583	9.55338	8.71149	10.1389	9.22668	8.54495	8.5241	9.01136	10.5564	8.85301	9.24824	9.35878	9.4984	8.195	7.22639	9.45237	10.7073	9.36805	9.25938	7.40799	8.30425	7.84968	8.84812	8.07083	9.58406	9.66937	8.06329	8.76652	9.77533	7.56677
CYFIP2	1.12e-15	10.5322	8.94367	9.97307	8.43623	9.86883	10.2453	8.29396	9.95151	7.96076	10.4429	10.3976	11.2301	9.1346	10.2047	10.9046	11.9594	10.1652	8.77744	9.31878	8.55549	10.2469	10.3773	8.95126	10.5358	9.88861	8.6727	11.4228	10.1193	9.99152	8.35975	9.2234	9.85704	10.2019	10.2934	11.9499	9.21699	7.93971	9.43112	8.96702	9.38444	10.0785	10.2172	9.54004	10.5362	9.6197	10.0315	9.11596	8.75245
SLC32A1	1.13e-15	7.59709	6.26057	7.44125	5.69893	6.94465	8.12261	4.95198	6.29711	4.85758	7.6395	7.96485	8.28105	6.25969	6.79521	8.09226	9.31763	7.32659	6.71237	8.12272	6.75117	4.94868	7.14037	5.64602	7.33756	7.70652	6.79487	9.23031	7.57487	6.66018	6.21871	6.38317	6.16987	6.35206	7.2483	9.56321	7.05582	7.0364	5.21765	5.99979	4.5571	6.74067	5.77236	5.05432	7.12341	4.81246	7.58833	7.59435	6.30337
TUB	1.14e-15	8.28077	7.66072	7.84451	7.46356	7.69794	8.07796	7.90796	9.25249	7.86251	7.92432	9.61315	8.34889	7.44048	8.39004	9.40849	9.55314	8.4299	7.51917	8.29493	7.52231	8.37942	8.34248	7.6892	8.61289	8.4419	7.53831	8.70142	8.17139	7.99316	8.39691	8.08234	7.88918	8.45887	8.50598	9.41015	7.97143	6.8496	9.69799	7.40698	7.92025	8.06524	8.24545	7.9313	8.04947	7.91834	8.1046	7.58442	8.06275
AGTPBP1	1.14e-15	9.64566	9.00809	10.2384	8.45081	10.1506	9.08518	8.89112	9.50356	8.28836	9.83188	8.71861	9.48349	8.49109	9.31108	10.5113	10.5255	9.91169	9.23501	9.61146	8.23085	10.0745	9.21491	8.81278	10.0663	9.73811	8.72299	10.0768	9.77413	9.21378	9.58489	7.33939	9.99505	8.99055	9.35878	10.5324	9.0941	8.66092	9.40876	9.08009	8.9502	9.53378	8.97344	9.05592	8.59467	8.60561	9.4138	9.1505	8.77802
SHANK2	1.14e-15	8.1694	5.97749	7.89406	6.62894	6.92304	7.11412	6.24253	7.08022	6.65391	7.67229	8.00152	8.68066	6.13823	6.91029	9.06386	9.8324	7.44556	6.37598	6.98011	6.23382	8.65351	6.69925	5.6312	8.15029	8.39268	6.78125	8.89542	7.69337	7.58786	6.29404	6.62761	6.87885	6.60815	7.81667	9.81931	6.68964	7.61182	7.37935	7.99604	6.72507	7.53187	6.58718	6.51721	6.88813	6.86812	7.24171	6.35898	5.7149
ASIC2	1.15e-15	7.69307	5.57247	5.71917	4.89352	7.17202	5.60499	4.80366	4.6599	7.2054	7.73987	5.73022	7.96821	6.46076	7.36491	8.14169	9.43762	7.98551	6.18989	7.5272	5.3189	5.00539	7.30768	7.73134	6.85389	5.25382	6.30132	8.20122	6.6689	7.29671	5.14721	4.50479	5.06378	7.53138	5.48014	9.84975	4.92674	4.3335	4.73438	4.57483	4.85122	7.92676	4.71274	5.70572	6.61717	5.11915	7.6167	6.4498	5.84966
RP1-212P9.2	1.16e-15	4.73366	4.77775	4.79399	4.70094	4.73784	4.56744	4.88293	6.26677	4.70497	4.97012	4.07892	7.15389	3.62632	3.87336	4.82478	7.87636	4.04141	4.49084	5.23441	4.10183	3.82762	4.55106	5.33202	4.23861	4.46455	4.5421	6.47641	6.26013	3.35719	4.23502	4.28478	3.47814	4.79049	5.5768	7.22217	4.45645	4.96622	4.68837	7.88707	4.68502	6.61177	5.24496	5.18645	4.2301	8.84799	4.70051	3.76462	4.24613
SERPINI1	1.2e-15	11.6744	7.9954	12.3884	9.79253	12.4853	11.0107	11.0489	8.70722	9.86063	11.9109	8.08326	12.7404	8.01205	11.031	12.8495	13.4227	11.3248	8.31819	10.4385	8.68156	9.26612	10.1269	7.83149	11.1789	10.1839	8.74676	12.8911	10.2457	11.3744	8.37777	7.93066	8.40268	8.23208	10.4429	13.3114	9.2803	7.96272	10.0037	6.30153	8.25885	11.1051	7.66561	9.94493	10.901	11.3031	11.0204	9.15266	9.04059
FOXD1	1.2e-15	8.17166	10.8288	9.03815	8.55892	8.92531	9.2342	8.50559	8.75219	9.81669	8.66895	10.5518	9.09235	9.27414	9.88361	6.46397	7.15389	10.1452	8.9616	9.08403	9.93346	9.49666	9.41366	10.3472	9.39844	10.1845	10.4003	9.27486	9.6403	10.0127	9.69715	9.708	7.87155	10.0046	9.57265	7.29987	10.791	8.4017	11.3149	9.92752	10.524	9.64181	10.2256	10.6728	7.83084	11.0515	6.78715	10.1437	9.74426
NEXN	1.22e-15	7.80542	8.03374	8.71719	7.52157	8.40019	8.58739	8.02629	8.25002	8.12841	8.51275	6.76359	7.6925	8.09526	8.78991	6.98933	6.91533	8.25698	9.28307	7.18846	6.59766	8.27542	7.84429	7.73186	7.99055	7.54112	9.39065	8.37654	7.75334	7.72471	8.00074	7.46428	7.24563	7.33544	6.89143	5.60522	8.80352	7.57124	8.59607	7.86132	8.90149	8.72423	8.03881	7.73015	7.95574	8.47889	7.80199	8.45707	8.4269
KIAA1549L	1.26e-15	9.16291	7.67822	8.51458	8.14704	7.76448	8.57074	8.38206	7.81032	8.22384	8.89059	8.77687	9.9245	7.68907	7.66131	9.74358	10.8202	8.71465	7.44996	8.2216	8.64264	8.79772	8.58166	7.61434	9.10772	8.04861	8.8759	9.89468	8.56472	8.9669	8.08262	8.38179	8.49057	8.53622	8.76444	10.7581	7.95743	10.0782	8.43706	9.23075	9.35867	8.4614	8.83338	8.34206	8.37451	8.8445	8.6995	7.51162	7.60736
CD200	1.27e-15	10.2329	9.11894	9.85637	8.32427	9.63815	9.64648	8.44549	9.80254	8.69558	9.79269	10.226	10.5752	8.61117	8.46983	10.1949	11.1139	9.85393	9.7744	9.1294	7.91667	10.3777	9.58688	8.02668	9.95151	9.90474	9.14115	10.5448	9.45268	9.2813	7.8938	8.31885	10.6007	9.43068	10.0008	10.8373	8.80947	8.17139	9.77691	9.24372	8.6703	9.38837	9.02284	9.175	9.53729	9.38635	9.17589	9.02382	7.92524
AP3B2	1.29e-15	8.14117	8.469	7.58361	7.93217	7.48535	7.78784	7.17827	7.89353	7.6919	7.91667	9.11125	9.14215	7.0515	8.05034	9.20317	9.5291	7.21832	7.16268	7.56574	7.8612	7.7126	8.50789	7.06889	8.22357	7.38212	8.02151	8.83959	8.17868	7.74712	7.37492	7.82766	7.27575	8.50424	8.60799	9.76363	8.13911	7.00493	7.42056	8.0369	7.38656	8.06754	7.31795	7.34009	7.88303	8.16015	8.14392	6.57484	7.61166
PLP2	1.3e-15	11.3406	10.7975	9.98006	10.5894	9.60006	10.9849	10.6779	9.79036	10.7811	9.13523	7.73	9.32052	10.6186	9.10593	7.41286	7.90884	11.3931	11.7117	11.3912	11.3103	10.0941	9.38666	11.6136	11.053	9.45489	11.8675	9.77629	11.7831	9.55338	11.3552	10.7034	11.8274	10.3909	10.3929	7.06573	10.83	11.6183	10.7531	11.2237	12.1187	10.9966	8.0515	10.5035	7.47414	8.34903	10.0955	10.78	11.7725
LOC283070	1.31e-15	10.3874	8.75726	10.2141	8.72413	9.41254	10.0877	8.78347	9.06005	8.54977	10.4589	9.43986	10.766	8.69129	9.78106	10.3244	11.6718	9.64352	9.00667	9.21971	8.68295	8.85625	9.56321	8.84002	10.8742	9.34899	9.01744	11.0752	9.64843	9.74411	9.192	9.26431	9.12481	10.4351	10.211	11.842	9.59828	9.01194	11.7915	9.39497	9.14101	10.042	9.71884	9.02284	9.361	9.70469	9.94701	9.26366	8.88181
ARHGAP32	1.32e-15	8.55646	8.3213	8.58694	7.97033	8.47551	8.2523	8.17178	7.79653	8.51696	8.39401	8.87281	9.15461	8.18146	8.52354	8.83786	10.0815	8.45607	8.03052	7.8884	8.48152	8.1666	8.6921	8.39324	8.55446	8.41269	8.39027	9.13161	8.20122	8.2691	9.11204	8.36309	7.70706	8.52025	8.72353	10.1291	8.35641	7.10743	7.78545	8.32283	8.153	8.23581	8.80543	8.30624	9.12168	8.4331	8.29425	8.29136	8.6276
RP11-416I2.1	1.35e-15	8.31832	7.08352	8.24912	6.83712	7.92773	8.06318	7.38898	7.41297	7.9646	7.70439	8.14006	8.47237	7.0451	7.46049	8.31746	9.1634	7.39186	7.02276	7.83511	6.21586	7.45268	7.26383	7.02213	7.57776	6.74723	7.80579	8.54926	7.45516	7.64852	7.81346	7.95388	7.41608	7.71036	7.97033	9.14908	7.46049	7.55355	7.61001	8.0249	7.60097	7.28042	8.00152	7.15959	7.36146	7.27561	7.40989	6.22008	7.01072
CLSTN1	1.35e-15	11.9883	11.2401	11.9934	11.997	11.8796	11.9427	12.0527	11.7816	12.401	12.6107	11.7172	12.7442	12.0216	12.1912	12.2089	13.1503	12.111	11.073	11.8617	12.1814	12.0148	11.6533	12.1378	11.9953	11.9393	11.8494	12.7018	11.9677	11.8617	12.8373	12.0282	12.0317	11.3795	12.8034	13.0794	11.4855	11.5817	11.3435	11.9284	12.0112	12.1089	11.5399	12.3366	11.8449	11.3149	11.8885	11.2997	11.585
HECW2	1.35e-15	7.90224	6.59964	8.78803	6.23228	8.39254	7.42205	6.50497	6.20063	7.46466	8.38674	7.53175	7.97687	7.07203	7.15289	8.74251	8.79122	7.30214	8.37642	6.40434	7.33379	7.17896	7.74171	6.7217	8.06127	7.72447	7.75944	8.33	7.41156	7.45776	7.48735	7.03715	6.36787	7.89301	7.61457	8.81552	7.09799	7.0003	9.4488	7.19922	7.1639	7.62433	7.64884	7.28897	7.02626	7.67512	7.68483	7.89439	6.81151
ROMO1	1.36e-15	10.424	11.2443	9.89957	11.3397	10.8673	10.8601	11.4501	10.5678	11.3661	11.0272	10.2671	10.5593	10.9231	10.2764	10.1783	9.81989	11.4392	10.4253	11.4737	12.9631	10.4736	9.58882	11.138	10.4457	10.8512	11.0304	10.0431	11.0999	11.0674	10.9778	11.5258	11.4246	10.9365	10.9022	9.87326	10.7237	11.9484	10.8879	10.4615	11.0377	11.2619	10.8644	11.9062	10.983	11.3591	11.1789	11.3733	10.7034
RP11-143K11.1	1.43e-15	7.91174	6.81775	7.0767	7.33939	6.56423	7.20349	6.73625	7.30255	6.91387	6.77482	9.1807	8.34761	6.506	7.12294	8.32117	8.42636	7.38433	7.04433	7.17774	7.47061	8.35157	7.3604	6.97369	7.47933	7.7329	6.89461	8.42702	8.15416	7.48331	6.83973	7.3626	6.19569	6.53802	7.30506	9.22869	6.43438	6.37128	8.55469	6.79935	6.69966	7.30641	7.76404	6.26079	6.44423	7.61947	7.63183	6.90847	6.55623
BRI3BP	1.43e-15	10.3848	9.39109	10.8194	9.64677	10.1707	10.1888	10.119	10.5579	9.61468	9.7744	10.2747	10.4717	9.71942	10.5245	10.807	11.0599	10.0908	10.6311	9.53247	10.3755	9.84308	10.2371	9.941	9.74672	9.65289	9.90446	10.5527	9.21519	10.2519	8.98484	10.8058	9.97578	11.0292	9.85865	10.5954	10.4534	10.4038	9.59284	8.91976	9.86167	9.48758	9.40044	10.1584	9.80686	9.93634	10.3481	9.45326	9.79441
GBP2	1.43e-15	11.1139	11.5175	10.5944	9.94165	10.4943	10.6297	9.61787	9.13615	9.25824	10.4495	9.02094	9.59497	10.9238	9.03138	7.57325	6.92425	10.7932	10.5264	11.6067	10.3187	9.7044	7.45388	10.0169	10.305	8.78377	11.8066	9.93673	9.43266	9.65261	11.6313	9.51713	10.15	8.29881	9.50554	7.18596	10.6077	10.9918	9.9289	10.7454	10.8661	11.4172	11.9531	9.37268	11.0408	11.1936	10.1326	10.6838	11.0606
RBM28	1.44e-15	10.7002	10.157	9.63194	10.2798	10.2484	10.303	10.428	9.91025	10.4153	9.98865	9.57495	10.3265	10.8742	9.79253	9.75952	9.31994	9.69627	10.0527	9.85637	9.73264	10.7114	10.293	10.5991	10.7317	11.0818	10.635	9.71396	10.4793	10.1641	11.144	10.523	10.5781	10.0509	10.373	8.7801	9.96758	10.3624	9.78312	11.1447	10.8847	10.321	10.119	10.6718	9.73133	10.4775	10.1444	9.96504	10.33
FSTL1	1.45e-15	11.9799	11.3067	10.7078	10.766	11.0153	11.0474	10.638	11.286	10.7504	11.7186	9.27695	10.7952	11.2451	10.7542	9.07303	9.35634	11.801	11.7335	11.2714	11.166	10.6849	10.3114	11.0317	11.0363	10.5046	11.4902	11.7031	11.1783	10.6723	10.7624	11.2212	12.039	10.3013	11.5399	9.07666	11.0789	11.7816	12.8034	10.0798	11.2188	11.3755	10.6893	11.566	11.0796	10.6166	10.9353	12.1264	11.1169
VGLL4	1.49e-15	10.7068	11.7738	10.4511	10.9398	10.8802	10.8378	11.0371	10.2654	11.2333	10.7893	10.364	10.8639	11.2317	10.2329	10.2953	10.2364	11.1628	10.7887	10.522	11.3131	11.1628	10.7216	11.0648	11.2382	11.2722	11.367	10.7597	10.9778	11.286	12.2735	10.639	11.4228	11.053	11.5344	9.97717	10.6718	10.8972	12.4365	11.6241	10.0771	10.9162	10.6915	10.7045	11.5258	10.524	10.524	10.7426	11.234
RP11-395B7.7	1.51e-15	9.13432	9.30482	8.64118	8.66119	9.60647	9.2825	8.96878	8.04594	9.24524	9.10282	8.88519	9.02692	9.5674	9.62924	8.31525	7.52423	9.32191	9.6397	9.85509	8.87619	9.1016	8.66692	9.63745	9.06168	8.76456	9.21563	8.51188	9.45462	8.64834	10.0771	9.3208	9.23045	8.54411	9.45778	8.0802	9.49257	9.95769	9.99439	9.95941	9.95872	9.38694	9.23269	9.3671	8.86504	8.56984	9.28552	9.11097	10.1265
MAN2B1	1.53e-15	9.61957	10.6297	9.93893	10.0812	10.5266	9.53794	10.2284	9.78279	9.62881	10.6236	9.28359	9.59946	10.4896	10.5607	9.29657	7.8531	9.82825	10.0163	9.74622	10.7594	9.83607	9.65857	9.98452	10.0239	9.56973	10.2578	9.60997	9.31573	9.8019	10.0163	9.82681	10.254	8.92218	9.38837	7.86999	9.56933	10.8802	9.89689	10.6122	10.434	10.2469	10.0363	10.2275	11.2653	10.5873	10.523	10.0606	10.2179
MYD88	1.56e-15	10.7836	11.2518	10.9309	11.3795	11.0737	11.154	11.3127	11.2188	10.9932	11.0984	10.3333	10.4693	11.3846	10.9437	9.77533	9.68781	11.0802	11.3447	11.4935	11.286	11.0219	11.2569	10.9099	11.5164	10.6505	11.3495	11.0668	11.131	11.2091	10.8047	10.5786	11.0654	11.4511	10.9524	9.42208	10.9932	12.1264	11.6299	11.9627	11.5225	11.111	10.8024	10.9187	11.2843	11.1426	11.5671	11.0944	11.0466
TAGLN2	1.56e-15	11.2466	12.488	10.7237	11.9122	11.3962	11.2401	11.6149	11.2301	11.4301	11.5302	9.15969	10.6431	11.9427	10.1399	8.71465	8.53526	12.4084	12.4203	11.1775	12.2494	11.2164	11.3239	12.1486	11.6486	10.763	12.7184	10.6625	11.8525	11.3902	12.4033	10.5904	12.2918	11.7967	11.3112	8.88651	11.8617	12.6296	11.6871	12.115	12.3559	11.9917	9.05862	12.0703	12.4255	10.013	11.7753	11.6932	12.3086
MS4A6A	1.58e-15	9.84753	11.0433	10.6166	9.40137	10.7426	9.92482	9.24721	9.71431	8.79229	10.2162	9.21015	8.50811	10.5632	9.9166	8.90926	7.45633	10.295	10.6488	9.64	9.55965	9.78241	9.24252	10.3249	10.0879	9.55486	9.80826	10.5665	9.67554	9.6004	8.60888	9.41841	9.65429	8.16552	9.59497	8.00259	10.5484	9.98223	9.74068	9.54662	10.2473	9.45207	10.4863	8.99974	11.0661	10.6316	11.3865	9.92282	10.4258
LANCL1	1.59e-15	11.3591	10.3484	12.2189	10.1197	12.1835	11.053	9.88021	10.8256	10.1307	11.2276	11.0697	11.3006	10.2176	11.3542	12.2268	12.0777	11.0606	10.1555	10.5684	9.84624	11.0775	11.1686	10.2126	11.4003	11.541	10.2338	11.4891	10.8261	11.6799	9.67094	10.3442	10.5959	11.0336	10.8018	12.1644	10.4457	9.42937	10.6176	9.66181	10.1672	11.4582	10.2868	10.8795	10.0011	10.9296	11.7043	10.3089	10.5293
TLR2	1.63e-15	8.77928	11.0538	10.3909	9.13491	10.1022	9.29265	8.85301	8.94956	8.58086	10.0846	8.10942	8.28939	10.3532	10.4553	7.86372	6.45613	10.3726	10.2325	9.28195	8.8741	9.36493	8.94724	10.3735	9.69324	8.85489	9.49714	9.6776	9.12625	9.14986	8.94285	8.2499	9.1147	8.25592	9.09497	7.72001	10.0258	9.27098	8.58522	8.32945	10.1014	9.66395	9.95359	8.47889	9.85178	9.07609	10.5988	9.2357	9.49548
KCTD16	1.69e-15	7.80971	6.36996	7.74771	4.35793	7.04008	7.82938	5.907	7.89708	5.95424	8.19149	6.80352	8.67872	6.32892	6.17285	8.45092	10.1548	7.76189	5.99566	7.59318	6.431	7.27013	7.12308	6.41712	7.79477	6.98921	5.38182	9.58061	7.57355	7.42693	6.09723	6.1808	7.12104	6.89843	7.30078	10.0025	5.23705	7.60858	5.09287	8.28939	6.08701	7.12851	6.77708	6.33859	5.62558	6.84936	7.39941	6.54627	6.50463
ANO6	1.73e-15	10.45	10.953	10.307	9.86394	10.3108	10.123	9.90956	10.2827	10.085	10.5103	9.86278	8.46034	10.9579	10.4448	8.9674	8.5217	10.8474	11.1701	10.5741	9.90831	10.5415	9.91968	10.9708	10.8588	9.82025	11.0614	10.1014	9.8448	10.3106	10.1699	9.509	11.0661	10.3135	9.7448	8.13143	11.0178	9.91169	10.9992	10.7641	10.9276	10.424	11.222	10.4485	9.81769	10.3923	10.1433	10.581	9.93468
TEF	1.74e-15	8.17868	6.61768	8.44884	7.51026	7.98714	8.14117	7.50017	6.96808	6.70134	7.93519	8.46925	8.6585	7.1516	8.1837	8.92898	9.77276	7.92511	6.35324	7.74784	7.27472	7.16928	8.50918	7.96089	7.9313	7.90513	7.16785	8.9793	7.74821	8.01628	7.14743	7.81384	5.92425	6.55128	7.96726	9.48049	7.93383	7.68286	7.26855	7.53677	7.11021	8.1302	7.22355	7.37591	8.03921	7.67459	7.62743	6.91806	7.23783
ACADSB	1.75e-15	7.83511	7.26413	8.63034	7.76766	8.45269	8.01111	7.90985	6.87474	7.79319	8.194	8.82265	7.7597	7.5343	8.53151	8.85078	8.85758	7.87118	7.14136	7.99551	6.4531	7.93623	8.31085	7.24692	7.84497	7.63199	7.40344	8.38779	7.3034	7.75679	7.35185	7.8347	7.69921	8.68878	7.16969	8.73742	8.65477	7.89092	8.54926	7.80531	7.78893	7.77884	8.43287	7.34127	8.33485	8.05167	8.30802	6.89494	9.99749
TSPYL4	1.75e-15	12.5751	11.6533	12.0112	11.8825	11.8554	12.2384	11.8046	12.1955	11.0466	11.9284	12.4529	13.023	11.5099	11.7753	12.6755	13.4293	11.903	11.0689	11.9202	11.7831	11.9799	11.8867	11.4891	12.3017	12.136	10.8776	12.8776	12.2049	11.5198	11.5258	11.584	12.3778	12.0512	12.0442	13.2697	11.5164	11.4236	11.6932	11.2333	11.0204	11.7146	12.254	11.6102	11.1185	11.4621	11.4301	11.6508	11.3846
CENPU	1.76e-15	8.7488	9.13405	8.2195	9.87248	7.88291	9.01716	9.95223	10.1532	8.29348	8.44382	8.03896	9.60279	8.83364	7.88864	7.62333	7.24382	8.50623	8.93331	8.68371	9.68375	9.14492	9.1586	8.52092	9.59059	9.64884	9.10382	8.62521	9.95769	9.51999	9.09049	9.40902	10.4664	9.97816	9.33622	7.66377	8.44498	9.71024	8.21578	9.06412	8.86553	9.0625	8.08084	9.55225	8.00688	9.02762	7.77176	8.46359	8.1134
RYR2	1.87e-15	8.0564	5.43255	8.62218	5.00143	7.0916	7.11635	4.22795	6.35206	4.74212	8.13898	5.55891	8.85656	4.9057	6.14154	8.58638	10.2937	6.10576	5.05034	6.37912	4.87041	5.00288	7.36323	6.18763	7.68457	6.03454	4.6046	9.53436	7.40199	7.52797	4.96579	3.93981	3.59103	3.67001	8.3649	10.2473	4.05428	5.4824	6.00927	5.32035	4.75137	8.1272	6.05586	5.65805	5.32855	5.8198	7.86034	5.10544	5.87749
SLC17A7	1.87e-15	11.5566	7.87706	10.2457	7.80615	9.17484	10.972	6.97902	7.51829	7.5155	11.0259	8.41981	12.0924	7.73409	8.42799	11.6171	12.6429	10.2204	7.7382	9.76574	8.18002	7.79833	10.495	7.86132	11.411	8.49434	7.85362	12.7337	10.4347	10.4026	7.6971	8.02905	7.18387	7.55382	10.6118	12.7913	7.69294	7.43619	7.76363	7.62333	8.40831	10.7472	7.44864	7.78602	9.11982	7.39489	10.635	7.79722	7.52143
DYNC1I1	1.95e-15	9.47869	7.56612	10.0861	7.0645	9.73345	9.15667	7.29265	8.67986	7.23195	9.52807	9.09999	10.4703	7.55753	9.54545	10.3274	11.1272	8.97132	7.87622	9.89433	7.9216	8.42329	8.51201	6.74806	9.20344	8.85237	7.24255	10.5424	8.90094	9.14705	7.57267	7.4457	8.19361	7.88422	8.51406	10.8976	7.66648	8.37577	8.03675	7.76836	7.10393	9.91041	7.83058	8.02706	9.50429	8.83239	9.03838	7.53175	7.0141
SEC14L5	1.96e-15	10.0198	8.18641	11.1653	7.75718	11.5616	8.38356	8.01955	7.84463	8.1128	10.1197	8.13665	9.98848	7.72331	10.1895	11.3015	11.0086	8.75037	8.06478	8.29581	8.45092	9.21181	8.18865	8.3204	9.06439	9.78312	8.06602	10.0199	8.22395	9.4733	8.12556	7.61656	8.50201	7.74441	8.35861	11.4246	8.26636	8.3787	8.13079	8.09865	7.91447	9.60617	7.78428	8.54884	8.60374	9.25295	9.30412	8.4269	7.84052
TNFRSF1A	1.98e-15	10.8756	11.3306	10.8776	10.9028	10.7744	11.75	10.8897	10.6066	11.9109	11.8066	10.5401	9.40282	11.0554	11.2551	9.45839	8.70435	11.3951	12.0651	11.2805	11.5627	10.7173	11.141	11.8053	11.0648	10.0484	11.6919	10.5329	10.0885	11.0898	10.6344	9.80028	11.0944	11.5355	10.9437	8.18768	12.1731	11.4191	11.157	12.0234	11.4926	11.4654	10.9586	11.6508	11.1936	11.0422	11.875	11.5422	10.9836
CAMK1G	2.01e-15	7.6457	7.00155	7.37391	7.11359	7.11703	8.01111	6.80783	7.28927	7.09988	7.83084	6.95881	8.80961	7.41983	6.80309	8.43545	10.0309	7.43277	7.08697	7.44048	7.18205	6.916	8.47837	6.41584	7.65241	6.8378	7.0843	8.45681	6.69871	7.04359	7.02114	7.28103	6.88575	6.35002	6.74843	9.67711	6.66274	7.34458	6.96384	7.05654	6.67739	7.11387	7.23296	7.10025	6.653	6.60518	7.43838	7.07752	7.11862
TOLLIP	2.02e-15	8.86875	8.63228	8.81736	8.66301	8.77286	9.00022	8.46766	8.71414	8.80685	8.60363	9.14678	9.36918	9.01796	8.47068	9.00102	9.79913	8.85568	8.71364	9.0941	9.15888	8.4164	9.11342	9.05128	8.75219	8.11955	8.66453	9.44227	8.65987	9.0464	7.39941	8.25423	7.40746	8.54855	8.6363	9.86167	8.25365	8.92325	8.05167	8.1379	8.59308	8.7272	8.14573	8.62494	8.95126	8.5274	9.25383	8.45104	9.14986
NRM	2.03e-15	10.8572	10.7114	10.2309	10.7548	9.86513	10.5959	10.8795	10.582	10.8408	10.3403	10.1961	10.9162	10.6221	10.1699	9.70426	9.52437	10.5387	10.5846	10.3434	11.3655	10.5875	10.618	10.7666	10.782	10.8391	11.0802	10.4407	10.9745	10.9124	11.2843	10.8493	11.5366	10.6631	10.4506	8.51785	10.4793	10.8879	10.7738	11.4501	11.1492	10.618	10.3385	11.086	10.6436	10.7618	10.154	10.746	10.2687
NCDN	2.11e-15	9.45008	7.43319	9.33025	8.02047	8.42595	8.91557	8.22343	7.76066	8.55867	9.35167	8.21236	10.242	7.55984	8.01298	9.51569	11.131	8.81889	8.39524	8.83872	8.10012	7.74604	9.16001	7.94056	9.17808	7.91736	7.82183	10.6242	9.03838	8.38515	8.5656	7.31717	7.01689	8.22328	9.46238	10.9818	8.11583	8.01205	7.00229	8.32916	7.82709	9.23075	8.11771	8.0063	9.13996	8.03661	9.1005	7.54899	8.94918
HSPB1	2.12e-15	12.5809	13.0432	12.1324	11.5269	12.2109	12.5683	11.2237	12.1427	11.772	11.8316	12.8136	11.3912	13.0329	13.0083	11.0377	11.2886	12.2313	13.2865	12.6818	11.9763	12.0567	12.7682	12.7721	13.1448	12.3806	12.9361	11.8346	12.2447	12.1606	12.7642	11.2131	12.8454	12.9631	12.6719	11.0839	12.8454	12.2189	12.6069	11.635	12.8412	12.5132	12.9723	11.261	13.821	11.584	13.3735	12.8696	14.195
CHST14	2.12e-15	9.6858	10.4825	9.56889	10.357	8.71675	9.5237	10.3767	9.56989	10.1988	9.78378	9.36834	9.52129	10.0386	9.60555	9.11954	8.64847	9.90073	9.95908	10.0684	9.96791	8.68397	9.88482	10.482	9.01372	9.39157	10.3143	9.09091	9.22767	9.291	9.48128	10.0874	9.50429	10.8627	9.72469	8.65931	9.70109	10.1822	10.3434	10.1128	10.6395	9.54307	10.7195	10.5607	9.53071	10.295	9.83833	9.98801	10.4656
RAP1GAP2	2.15e-15	9.67554	8.8412	9.23462	8.27608	7.81463	8.48139	8.22805	7.24651	7.15446	8.6335	7.38787	9.28359	4.85006	8.41028	9.73373	11.166	8.62314	7.62759	8.40019	8.11583	8.93764	8.06813	8.5159	8.48768	7.51648	7.52116	10.2453	8.78022	8.80658	8.53886	4.77144	8.57333	7.74867	8.12057	10.8378	8.50517	7.55136	7.16898	8.48662	9.03995	9.24473	7.84884	8.64253	7.62056	6.15033	8.7009	7.47346	7.40528
CRYM	2.31e-15	10.3272	8.20214	9.38606	7.31123	8.60427	10.9491	7.3016	7.98551	8.4861	10.6405	7.7528	11.6124	5.26594	9.9046	11.138	12.3736	10.1931	7.39581	9.86962	8.33649	8.71768	9.2959	8.3204	10.6316	8.59007	8.07021	11.9377	10.0046	9.77791	7.66561	9.38032	7.50969	7.81249	10.0802	11.9548	7.36666	10.4411	7.58251	6.92753	8.286	9.80717	8.0843	7.39824	9.31994	7.85362	9.99	8.74237	6.96207
PARP9	2.33e-15	9.51785	10.3967	9.64983	9.49801	10.3585	9.71916	9.55576	9.27148	9.40987	9.13034	9.27573	9.39308	9.87535	9.32191	8.87227	7.87231	9.97112	10.2901	9.96088	9.8161	9.24881	9.24853	9.72118	9.763	9.07609	10.0315	8.89915	9.28072	9.41779	10.0516	9.73557	9.68909	10.5056	9.62393	8.02135	9.74228	10.1775	10.0305	9.53407	9.63046	9.56098	10.0745	9.93329	9.67329	9.56413	10.2868	9.11697	9.54747
POLD1	2.41e-15	8.69401	8.35216	8.14931	9.03955	8.79921	9.01275	9.40849	8.74483	9.0673	8.35815	8.37123	8.92206	8.44204	8.66265	7.12613	7.27919	8.40545	8.77452	8.33787	9.2366	8.94888	8.68638	8.95963	8.85838	8.7108	8.86504	8.24779	9.42462	9.23799	9.26335	9.48267	9.63021	7.82898	8.41096	8.41627	8.97711	9.44781	8.90045	9.10353	9.24173	9.59559	8.50918	9.17655	9.02512	9.01052	8.60286	8.71479	8.74251
SOCS7	2.42e-15	9.49257	8.6306	9.03565	9.23075	9.47276	9.32488	9.45207	9.28552	8.96483	9.708	9.28118	10.3786	9.17666	9.34793	10.1299	10.0981	9.07327	8.42922	9.274	9.43018	9.72293	9.9689	9.60647	9.80148	10.0066	8.96609	9.67855	9.33595	9.68285	9.61668	9.82396	9.45034	9.77306	9.81387	9.97776	9.63759	9.29725	9.47412	9.8161	9.1594	9.6034	9.81507	9.14321	9.44107	9.57073	9.96219	8.90418	9.52096
HAUS1	2.43e-15	9.56843	9.98964	9.6004	10.4076	9.51801	10.0753	10.6455	10.7073	9.87502	9.75524	9.52711	10.1764	9.78204	9.47466	9.39471	8.34681	9.32736	10.0463	9.04897	10.3807	9.97372	9.64148	9.53201	9.9292	10.1768	9.83188	9.46121	10.9141	10.1403	8.79714	9.90626	10.856	9.75047	10.1953	8.47866	9.78133	11.5247	9.9917	10.052	10.2744	9.84034	9.89796	10.3657	9.36893	10.9966	9.38371	9.97615	9.50292
CD163	2.44e-15	10.4094	12.8696	11.4469	8.30931	12.1853	10.8188	8.42345	10.3751	9.26197	11.5454	9.37119	6.98963	11.6623	10.0559	7.07934	7.96899	12.4033	12.2871	11.9015	10.4267	11.8659	9.86678	11.8915	11.6932	9.83968	11.0502	11.9594	10.7227	8.87578	9.0673	9.39324	11.2349	9.45956	9.84588	7.37877	10.7841	11.0013	9.94985	10.1478	11.076	11.3258	10.487	6.42932	12.1531	9.88891	11.1507	10.7232	12.4499
GABBR1	2.45e-15	11.1147	9.76556	10.3954	10.4003	10.0613	10.637	10.1053	10.4355	10.6221	10.8228	12.817	11.3231	10.4085	10.4563	12.0007	12.1531	10.1444	9.47357	10.2252	9.38551	10.5161	10.8661	10.2264	10.9765	11.1201	9.83035	11.5933	10.4905	10.2052	9.97211	9.87565	10.0625	11.2815	10.5867	12.117	10.5479	9.32564	10.8972	10.4355	10.4843	10.3851	10.2641	9.96391	9.63702	10.3513	10.2966	9.98125	9.58406
FAM111A	2.46e-15	9.85163	9.60279	8.74633	9.45503	8.6201	9.2555	9.53056	9.57797	8.84785	9.12625	8.0307	9.89757	9.74244	9.25441	7.77003	7.82183	8.90926	9.89922	9.77736	9.47156	8.82559	9.0595	8.97769	8.70828	8.97427	9.09442	8.93486	9.20201	9.72732	10.5334	8.9647	9.8365	9.3122	9.53574	7.51461	9.47621	9.20529	9.3956	8.96186	10.0253	9.13242	8.87464	9.5965	8.76746	8.94527	9.92135	8.31806	9.86394
UBE2L6	2.48e-15	11.2975	12.1664	11.3532	11.3325	11.4828	12.0547	11.2877	11.5639	11.5497	10.8693	11.9427	11.0489	11.9122	11.2048	10.9398	10.8354	11.6385	11.8053	11.9594	12.5627	11.1265	11.5885	11.7043	11.5532	10.7831	11.9611	11.2962	10.8997	11.6844	10.8163	11.646	10.8295	11.4639	11.7018	10.476	11.3185	11.4398	11.6264	11.0723	11.5237	11.6183	12.6198	11.997	12.0036	12.103	12.1896	11.222	11.8316
MAP3K9	2.49e-15	8.75557	7.52688	8.65072	7.63501	8.25635	8.04084	7.1555	6.78951	7.92708	7.98934	8.22495	8.9099	7.88393	7.53315	8.76875	9.5389	8.01766	7.66241	7.86639	8.02706	8.70212	8.40559	8.15836	8.11452	8.42395	7.47589	9.00142	8.45413	7.80443	7.13504	7.1314	8.27527	8.09423	8.65975	9.53187	7.25005	8.84744	7.82254	8.1911	7.37391	7.9262	7.51364	7.6204	7.77688	7.39092	8.02658	7.5683	8.33574
PRKCE	2.6e-15	8.2429	7.27158	8.34192	6.79165	7.4656	7.56219	7.68417	7.84675	7.4425	7.93574	8.24384	8.94379	7.40286	7.33354	8.64502	10.2313	8.10903	7.41915	7.66623	6.68252	7.25384	8.16015	7.52704	8.15556	7.71637	7.45268	8.9191	7.82303	7.9262	6.95396	6.76769	7.0065	6.92454	8.2143	10.1112	7.20906	6.4385	7.33516	7.79833	7.28812	7.82303	7.7488	7.42784	8.18079	7.37312	8.03052	7.54221	7.08605
LIMA1	2.64e-15	10.1032	10.254	10.1467	10.8403	9.61298	10.1786	10.8543	11.0178	10.955	10.168	10.4979	9.65821	10.4058	10.5273	10.3679	8.852	9.61211	10.9856	9.67621	9.84191	10.6625	10.7189	11.3204	10.6816	11.0737	11.6718	10.007	9.77719	10.955	9.50998	10.7107	10.7393	11.585	10.1899	8.93818	10.8985	10.8126	11.3112	11.8525	10.6161	10.1291	10.9059	10.7636	10.5171	10.5268	9.18487	10.4765	10.6936
CCDC85A	2.81e-15	7.75957	6.78608	8.10542	6.39216	6.75467	7.46632	6.11114	7.64933	6.59935	7.86503	8.16526	8.8616	7.04051	7.10656	8.64317	9.17407	7.39995	6.47701	8.09935	5.70627	6.61842	6.73763	6.16284	7.53315	6.03454	6.87569	7.83422	6.33039	7.2314	4.9187	5.00831	5.57978	6.32024	6.42496	9.32528	7.52962	6.18532	7.61468	5.00288	5.89573	7.30136	8.19462	6.86754	6.12569	8.29557	6.63069	4.09524	6.61141
WLS	2.82e-15	11.8093	11.3447	10.7519	11.3696	11.6744	11.0033	11.4382	11.1734	11.7631	11.2203	10.245	10.6799	11.4392	11.4654	10.4829	9.87519	11.364	11.5707	11.0717	10.7932	10.8537	11.8291	11.186	11.8228	11.5002	11.6325	11.2179	11.3931	11.7789	12.3605	11.0661	11.8106	11.4081	10.6958	10.114	11.411	10.532	9.79672	11.6286	11.8274	11.5324	12.0844	12.2049	11.2466	11.74	11.6363	11.713	11.6573
ANO3	2.85e-15	7.80971	6.23959	6.58144	6.26397	6.53442	7.21188	6.2889	7.37376	6.31701	7.9667	5.28029	9.02064	5.86679	6.4383	9.31573	9.99931	8.23457	5.77439	6.603	5.30599	8.25341	7.22273	4.86674	8.02477	7.36798	3.60001	9.36905	7.56612	7.09018	3.44937	5.65159	7.83724	6.5307	3.34419	10.1322	4.50456	6.06817	6.51299	6.15315	4.7971	7.80493	5.88766	5.84009	6.71728	6.2548	6.90263	5.9482	5.66829
NPTN	2.85e-15	13.3353	12.4582	13.2281	12.81	12.6887	12.7552	12.81	12.0095	12.685	12.9631	12.8211	13.464	12.6137	12.8373	13.3046	14.132	13.2697	12.9816	12.654	12.4179	12.5935	12.9497	12.654	13.1139	11.6089	12.6719	13.9934	12.7682	13.0537	11.5707	12.6429	11.8675	12.7442	12.81	13.9302	12.4033	12.4411	13.0277	12.5051	12.7599	12.8034	13.0794	12.5627	11.8899	12.2334	13.0083	12.6755	12.748
ADRB1	2.87e-15	8.10189	7.35072	7.96371	6.7094	7.42433	7.88733	7.11137	6.63483	7.71867	8.47434	6.71116	8.62452	7.03954	6.93912	8.45774	9.20078	7.12308	7.57382	8.0671	7.80294	6.60388	8.76015	6.61752	7.18596	6.46882	6.603	8.80672	7.0413	7.92455	8.5958	8.38919	6.8298	6.49915	8.25823	8.93689	7.50321	7.9172	8.77286	6.87539	6.65088	7.49612	6.81822	6.69689	7.9591	6.5843	8.00617	7.62786	7.48342
NWD2	2.9e-15	7.69891	5.81927	7.09948	5.80148	7.00361	7.15848	6.31659	3.88082	6.7558	7.29915	6.8735	8.52473	4.00885	5.50553	8.3442	9.49855	4.77775	3.65721	6.89873	6.19025	6.28264	6.50419	6.83374	7.38821	5.45108	6.24865	8.54577	6.87885	6.64479	5.55314	6.93924	6.94587	6.16233	6.56526	9.13523	6.49337	6.62083	6.90586	4.94708	6.39973	7.02821	6.45008	3.857	5.24393	3.11566	6.97974	6.39473	4.38301
C1QA	2.94e-15	11.6671	13.1039	12.5051	10.7012	12.2384	11.7385	10.4017	11.6718	10.7125	12.0828	10.7996	10.514	12.5026	12.217	9.54175	9.1833	12.2688	12.217	12.0298	12.5359	11.5124	10.6963	12.1814	11.5024	10.7012	11.1806	12.4937	11.0149	11.5519	9.11274	10.9386	9.6792	9.86412	10.7738	9.31347	11.6017	12.2647	10.4992	10.9276	11.3185	12.0267	12.7116	10.6203	12.1187	12.2766	12.834	11.1911	12.5195
MSN	2.99e-15	12.1071	11.9729	11.6647	11.6533	11.8734	11.5509	11.3523	11.8974	11.8957	12.1303	9.37491	10.6112	12.3202	11.8245	10.2747	9.44615	12.0863	12.4639	11.6299	12.2518	10.5889	11.4794	12.0724	11.4263	11.6757	12.1089	11.6363	11.9298	11.6325	13.1191	10.5513	11.6785	11.8554	11.8152	9.62393	12.2776	12.406	11.8809	11.842	12.254	11.7998	10.1845	11.5791	12.0906	10.3816	11.8025	12.1427	12.3043
TMOD2	3.01e-15	10.4038	9.6184	10.2925	8.87321	9.84785	9.44279	9.1742	9.41352	9.30749	10.3715	10.5894	10.8006	9.66665	10.0628	10.8914	11.5099	9.41841	8.87552	9.68842	8.52797	9.46916	10.7624	9.23155	10.3394	9.51376	9.716	10.7993	9.71855	9.62621	8.97288	9.52467	8.79714	9.78006	10.2035	11.157	9.55392	8.1473	7.88211	9.75207	9.17213	9.55439	10.2718	9.88209	9.02049	9.92243	10.0147	8.8472	8.30609
NCS1	3.08e-15	9.12481	7.68173	8.7346	8.20332	7.96089	8.22103	8.00259	8.46359	7.16956	8.18781	8.28868	9.74795	7.71582	7.49234	8.87668	10.0349	8.45902	8.51201	8.17218	8.04442	7.85875	8.16229	7.72082	9.07327	8.21322	8.30397	9.25689	8.89267	8.1473	8.01039	7.75355	7.63938	7.96875	8.86504	9.85259	7.56146	8.11583	7.54591	8.50231	7.75563	8.48101	8.77478	7.69135	8.41349	8.38356	8.338	7.8995	8.41109
EIF4E3	3.08e-15	8.49968	8.47651	9.0348	8.62348	8.77636	8.34036	8.39524	8.19692	8.21003	8.16773	8.42522	8.65403	7.22764	8.32103	8.96835	9.61185	8.4017	8.43361	8.73279	8.35827	8.51922	8.06169	8.4762	8.73356	8.41449	7.83734	9.05328	8.46925	8.53346	7.70281	8.19214	8.1691	9.00938	8.3465	9.66584	8.00875	7.78428	8.94046	8.18422	8.3433	8.0725	7.79488	8.58406	8.2166	8.22133	8.53346	8.58387	8.09987
LGALS3BP	3.1e-15	11.6057	12.7952	12.5132	11.5779	13.3735	11.2939	11.7753	11.7631	11.6286	12.0182	11.6919	11.6313	11.9329	12.6069	11.3807	10.114	12.2776	11.3258	13.074	12.6504	12.5256	11.5112	12.3982	12.4312	11.1893	12.4853	11.4458	11.3818	11.9313	11.2484	12.4664	12.1588	12.0282	11.6089	10.4422	12.0762	12.3605	12.7756	12.542	12.3202	12.0425	12.5502	11.9313	12.945	11.7738	12.1486	11.4253	11.6641
CAMK2G	3.13e-15	9.97776	8.57698	10.0267	8.79578	9.58573	9.81356	8.66491	8.77703	8.87999	10.0117	10.5084	10.3428	8.99818	9.53216	10.1676	11.4828	9.20317	8.65324	9.12978	8.48453	8.41914	9.84191	8.32812	9.50703	9.34642	8.57117	10.6081	9.32621	9.45998	10.429	9.20408	8.55828	9.12899	10.3636	11.2869	9.78074	9.32191	9.49886	8.78942	8.99866	9.44019	9.39235	8.94543	9.33228	8.98659	9.69657	8.73279	8.87999
SCN3B	3.19e-15	9.72732	6.61078	7.50321	7.19494	7.24663	9.79984	7.63462	8.98508	6.36037	9.68039	11.0086	11.1447	7.89469	9.09802	10.972	11.8944	9.04238	6.78789	8.95501	6.93035	9.14158	9.17575	8.35564	10.4573	9.75173	6.67459	11.166	8.2625	9.12373	7.44433	6.90184	5.21873	7.77041	8.18743	11.7915	8.66764	6.80125	7.14122	6.51912	7.58926	9.28785	8.92571	7.4528	5.54474	7.71666	9.86376	8.31029	8.69672
ATAD2	3.26e-15	8.36542	8.43791	7.50646	8.67957	7.16775	8.46401	8.96509	9.60803	8.56345	7.99735	7.35286	8.71364	8.41563	7.58403	7.41641	7.11738	8.43338	8.94338	7.87803	8.3163	8.31773	8.80262	8.36878	8.6351	9.09249	8.76557	7.80554	9.07356	8.65113	8.61802	8.49915	9.89497	8.96022	8.21504	7.3594	8.05813	8.9031	7.39159	8.79179	8.35216	8.28751	7.81857	8.80645	7.55437	8.75543	8.0234	8.4036	8.51879
THRB	3.26e-15	8.7749	7.28293	8.24315	7.70613	7.95704	8.65452	7.59196	7.98245	8.5386	8.65198	9.11166	9.45095	7.49169	8.12199	9.23631	10.6415	8.09767	8.11864	7.93368	8.51201	7.58872	8.7604	7.71426	8.78881	7.82254	7.56719	9.38355	8.02503	8.53029	7.96076	7.77842	7.2989	8.50711	8.11583	10.1047	8.00954	7.02418	6.42915	7.46908	8.17231	8.17218	7.45268	8.20556	8.04453	7.08104	8.493	8.43173	7.67229
HAS2	3.29e-15	8.78347	8.40697	7.68629	8.90765	7.53994	8.97288	8.22306	9.40646	8.89296	9.19083	7.67473	7.83634	9.88162	7.86921	7.05638	7.1178	8.58072	8.81956	8.56499	8.34433	10.0919	7.86669	9.27899	10.8245	8.96456	9.75408	8.22959	8.81736	9.61611	7.6022	9.20269	10.006	9.14253	8.86092	6.77403	9.11534	9.80254	6.41433	11.0839	10.7542	8.89609	9.30302	9.28799	8.58915	9.38868	8.52813	9.61498	8.77232
PTPN5	3.3e-15	7.52079	4.25733	7.56384	4.49354	6.45749	7.72182	5.4959	6.31384	6.32434	7.68351	5.94342	8.37654	4.25291	6.20717	8.18809	9.99833	6.60988	6.34747	7.12075	6.2697	6.69515	6.77992	3.77964	7.87493	6.56893	6.00737	9.1375	7.19534	8.12454	5.15769	4.43395	5.45163	5.98701	7.45886	9.89513	5.16753	5.69175	5.77964	5.54379	6.02074	6.92187	4.46012	7.3583	6.64162	4.66195	7.46453	4.81076	5.19615
ELN	3.34e-15	10.0789	8.9061	7.70885	11.1372	8.33774	9.31573	9.80717	10.1128	8.999	7.47744	9.92135	7.378	10.0091	10.8194	7.01928	6.61333	6.83973	8.42027	8.38463	8.39401	8.02629	9.55789	9.78279	9.83514	8.8274	9.91094	8.86805	10.224	8.82605	6.88366	10.1838	9.23965	8.115	9.17139	7.46632	9.7519	10.2552	8.59039	7.58133	8.6214	9.24298	9.24312	10.1441	8.13484	9.54865	8.44928	8.49938	12.1508
CKLF	3.34e-15	9.34191	9.35519	9.61059	9.2737	9.64868	9.75018	9.75408	9.82411	9.29959	9.2366	9.21152	9.59574	10.1246	9.61498	8.82641	8.4357	9.92482	10.2418	9.12625	10.6118	9.14883	9.46238	9.96375	9.24144	9.73846	9.49976	8.59699	9.73978	9.68134	9.76524	9.2349	10.2023	9.04193	9.58797	8.13006	9.75524	10.0625	8.92898	8.36542	9.99098	9.60863	9.19406	10.3189	9.86542	9.78547	9.71088	9.99439	9.17714
CRHBP	3.36e-15	7.84796	4.6807	9.06005	4.51633	7.10106	5.71066	4.60225	4.69627	4.44173	7.22665	4.46758	7.97758	4.65127	8.40656	8.54652	8.00299	4.05774	5.91145	7.09948	4.79934	6.9631	4.62759	2.66859	7.80807	6.7094	4.5421	8.09087	4.68582	7.73173	4.91683	4.82776	5.02183	7.31528	7.00815	8.28904	4.68379	6.49304	8.57228	4.81183	4.98968	7.63756	6.0809	6.54057	5.04741	7.51364	7.60334	6.13873	4.48389
MAPRE2	3.39e-15	10.5489	10.1359	10.9303	9.40009	10.9484	10.4673	9.3778	10.4929	9.4236	10.641	10.249	10.5689	10.412	10.7537	10.7494	11.0436	10.4929	10.303	9.82249	9.03244	10.7761	10.1938	9.36464	10.5974	10.571	9.97275	10.2921	10.1594	11.1372	8.34482	9.62569	9.75952	9.76593	9.75227	11.0723	10.4673	10.6609	9.7981	9.12738	10.2846	10.6118	10.0841	9.92316	10.1485	10.3123	10.9732	10.3106	9.44541
TBR1	3.43e-15	8.25474	6.17118	8.60785	9.14725	6.95659	8.42245	9.2215	7.39736	6.85482	7.28541	7.12452	9.34306	7.07144	6.78254	8.21198	9.97246	7.4446	4.79351	7.51577	6.87489	7.74916	7.69451	6.86144	7.70322	6.58844	7.23522	9.58309	7.52597	7.86359	6.11651	7.41528	7.54603	7.41429	8.00984	10.362	5.74554	7.30785	7.46731	7.2431	7.14554	7.67907	6.85893	6.19619	6.04376	6.7955	7.99837	6.01799	7.5611
LINC00622	3.45e-15	7.44152	5.72507	7.6838	5.68764	7.28628	7.0809	6.42431	6.59984	6.58448	7.95795	6.30299	7.88877	6.98366	6.77577	7.91052	9.00194	6.94387	7.67883	6.29997	6.42848	7.88481	6.55334	5.67589	7.73575	7.25975	6.64345	8.30639	7.08339	7.28412	8.51444	7.70827	7.31513	6.50335	6.97369	8.81694	6.60576	6.69769	6.98399	7.54034	6.48568	6.73395	7.3575	7.11553	7.24035	6.47385	6.69315	7.55396	6.4746
LSM5	3.5e-15	10.1262	10.3944	9.64593	10.9491	9.41619	10.5489	10.7648	11.1766	10.5684	9.98627	9.92401	10.2	10.9437	9.98645	9.68345	9.14829	10.1075	10.4218	11.414	10.6593	10.4107	9.95694	10.8011	10.4745	10.7078	10.0305	9.75408	10.7125	10.2523	10.3074	10.2628	10.6958	10.2909	10.7941	9.37608	10.2086	11.0682	10.3361	9.94774	10.856	10.4218	9.9351	10.8992	10.2023	10.7449	12.8412	10.8415	11.2122
MCM8	3.51e-15	7.26595	7.39851	6.74293	9.01024	7.39186	7.42025	8.80431	8.38281	8.20662	7.39005	7.14614	8.1124	7.50017	7.53637	7.04895	6.99643	7.37416	7.5533	7.14225	8.42571	7.06902	7.46522	7.23987	7.84869	7.44825	8.2429	7.20662	7.64136	7.77256	8.99001	8.77966	8.61903	7.94509	8.30153	6.72125	8.01205	8.83946	7.50758	8.34817	7.74916	7.38516	7.33673	8.89504	7.4747	8.26539	7.25847	7.45583	7.3111
YWHAH	3.53e-15	10.6445	9.99205	10.5378	10.1973	9.83035	10.7666	9.81286	9.89087	9.86097	10.5284	9.71521	11.5514	10.3563	10.0208	10.6565	11.9658	10.8041	9.99666	10.3054	9.82583	9.7981	10.3954	10.52	10.5678	9.51999	10.2718	11.6486	10.1295	10.4439	8.62438	9.61087	8.94752	8.97973	10.1714	11.7146	10.1722	10.2309	9.55298	10.1525	10.0066	10.3111	9.87466	9.61281	9.61928	9.77691	10.353	9.4859	9.75707
ICAM5	3.57e-15	7.95867	4.29526	6.36996	6.73207	4.08232	6.97021	5.09878	5.50345	5.86809	7.38762	6.96499	8.60296	5.86679	6.08447	8.48558	9.6329	7.67239	6.65544	7.28321	5.90961	7.1435	6.92371	6.94256	7.66099	6.52554	4.76109	8.94527	7.05391	5.93201	6.9714	5.13587	7.53175	5.04346	5.50051	9.68976	6.37417	6.42882	3.76654	6.80276	5.81137	6.83586	5.15594	5.23766	6.94531	3.33967	7.09658	5.84421	6.01354
KCNS2	3.65e-15	6.84524	6.55301	7.61468	6.57263	7.22468	7.12366	6.59668	5.77236	6.66157	7.05306	6.74132	7.34531	6.42774	7.40541	7.36639	8.58752	7.09772	6.22926	7.42875	7.09327	7.19591	7.28087	6.59139	7.21574	7.14939	6.79375	7.85795	6.99476	6.76359	6.78951	6.75203	7.32291	6.79521	7.0112	8.58612	6.33374	7.31349	6.96193	7.07709	6.38642	6.69568	6.99385	6.82468	6.949	7.04559	6.97574	6.97112	6.68286
PGM2	3.74e-15	9.25235	9.60308	9.49356	9.51488	9.02875	9.37119	9.57431	9.67458	9.70251	8.99743	9.06386	9.12509	9.67015	9.32488	8.28727	8.05737	9.9289	10.2735	9.38868	9.49428	9.45928	9.66214	9.60938	8.95652	9.03113	9.71007	8.81069	9.27765	9.63937	9.29456	9.40586	9.17394	8.90227	9.18487	8.10351	9.18171	9.14598	9.01615	9.61115	9.3596	9.0632	9.13916	9.97597	9.99243	9.33455	9.42149	9.66895	9.98056
RBM11	3.75e-15	7.37169	5.74476	7.51188	4.32363	6.77803	6.5186	5.3836	5.6127	5.56805	7.21806	5.90649	6.28873	6.2646	7.20812	7.84551	8.44104	7.22437	5.29734	7.07158	6.12411	6.59139	6.29087	6.09265	7.00616	5.7408	5.11225	7.60703	5.84787	6.56766	4.92013	6.40809	4.92576	5.73495	7.1228	8.73701	6.16841	6.66757	7.55953	6.17239	6.18321	6.92668	5.33692	6.05145	8.07866	7.07216	6.54105	6.56822	5.73683
PLCXD2	3.75e-15	7.80703	6.98366	7.60167	7.14614	6.63801	7.25691	6.97605	8.09116	6.73269	7.41368	7.8509	7.93697	6.65008	6.95199	8.39004	9.19644	7.11835	6.14026	7.02358	6.89127	7.41752	7.11914	6.38881	7.44623	8.09852	7.35617	8.71549	7.71597	7.27069	6.68364	6.86956	7.57382	7.2397	7.7126	8.26539	7.07006	6.48584	7.14599	7.25635	6.28244	6.95948	7.92444	6.73722	5.95731	6.74892	7.5619	7.70083	6.48671
TP53	3.77e-15	10.0595	10.4802	8.88129	11.0185	8.43856	10.1291	10.7449	10.0092	10.6701	8.82843	9.94701	10.1356	10.0113	9.31152	7.86204	7.33544	9.30468	9.59481	10.0966	10.0139	9.5449	9.22827	10.057	9.87696	9.36776	10.0865	7.47589	9.62193	9.43382	6.99	10.8468	9.58136	9.28057	10.1915	7.40312	10.0394	10.642	9.89021	9.21971	9.88694	9.70957	7.9121	10.5409	9.53676	10.1582	9.73978	10.0934	7.55808
CAMTA2	3.79e-15	9.67458	8.81104	10.1502	9.34109	9.81989	9.23908	9.08751	8.84229	9.24252	9.31676	9.25409	10.2504	9.4056	9.53729	9.99313	10.5011	9.06276	8.99633	9.80952	9.1645	9.48529	9.4463	9.21971	9.5331	9.25163	8.77779	10.071	8.97251	8.65756	9.84383	9.1742	9.26579	9.81074	9.47247	10.8119	9.09608	8.67586	9.48349	9.04428	9.42814	9.72245	9.3718	8.9002	9.36554	9.29265	9.46285	9.42814	9.00782
GFOD1	3.81e-15	9.39639	8.18914	9.34	8.23399	9.18938	9.07597	8.30139	8.46885	8.03028	9.62178	9.00871	9.9146	7.99528	8.38699	9.45119	10.6675	8.68295	8.48306	8.57752	8.01603	8.88295	9.20682	8.23816	9.47399	9.01822	8.61725	10.5699	9.08805	9.18581	8.43498	8.27865	8.40045	9.25221	8.91831	10.4997	8.06211	8.02617	10.2078	8.04975	8.27979	9.13628	8.43498	8.27041	8.50386	8.29076	8.89481	8.12521	8.469
CAMKV	3.85e-15	10.2794	8.18217	9.36893	8.53873	8.79095	9.78674	8.08639	9.15805	8.48426	8.96919	9.94037	11.1422	8.06898	8.45593	10.6081	11.6548	8.92037	7.50984	8.9094	8.24727	10.7677	8.48127	7.95638	10.0593	8.83144	8.30609	10.9605	9.8711	9.48821	8.35489	8.87552	8.61356	8.60051	9.75077	10.9792	7.68339	8.15556	7.86869	8.34078	8.27461	9.48169	8.51458	8.09155	8.42187	8.43818	8.85789	8.33893	8.54926
LYPLA1	3.9e-15	10.8934	11.6078	11.1501	11.3846	10.7756	11.3514	11.5862	11.5497	12.3444	11.0356	11.0703	10.4578	11.8245	11.1961	10.0621	10.1955	11.4707	11.6813	11.2276	12.0636	11.0371	11.3715	11.4511	10.9431	11.1432	11.5064	10.8548	11.2527	11.4615	10.6734	11.1007	10.9885	10.7189	11.2401	10.1108	10.7382	11.6584	10.3691	10.7761	11.4685	10.865	10.7358	11.9988	11.8406	11.0013	11.4392	11.893	11.107
LGI3	3.92e-15	8.20639	5.00831	10.2959	4.09401	10.6887	5.78325	4.50553	5.88442	4.01036	9.34391	5.5803	9.00559	3.91322	8.48883	10.9346	10.7068	7.21694	4.82952	4.06836	4.70497	7.36839	6.44359	4.03832	8.51097	8.69241	5.07426	9.46486	6.45613	8.01205	4.93293	4.63992	4.72203	5.05791	6.0712	11.1256	4.16618	3.80485	4.96024	3.9681	3.64267	8.98874	4.73651	5.24715	6.09642	7.99252	8.81497	4.67679	4.06677
TCERG1L	3.98e-15	7.67377	6.88221	7.72804	7.24853	7.21792	7.64586	7.35431	7.06329	7.44072	7.9455	7.69322	8.1445	7.35044	7.3579	8.26624	8.96965	7.38707	7.06794	7.42421	7.40007	7.58108	7.42066	7.26651	7.905	6.90555	7.38606	8.17256	7.1939	7.59824	7.52129	7.21806	7.66131	6.91949	7.61746	8.9083	6.85763	6.99833	6.84478	7.61213	7.32559	7.4063	7.35871	7.03954	7.81064	6.61113	6.85847	6.77945	7.47386
ADCYAP1	4.22e-15	6.78472	6.67672	6.8389	6.69539	6.86956	6.3264	7.01021	6.85254	6.91615	7.1057	6.92737	7.39301	6.73575	6.16126	7.69863	7.51902	5.88972	6.18785	5.89866	7.9585	7.42573	6.93398	6.81598	6.9693	6.65214	6.82212	7.15125	5.96987	6.79624	6.37128	5.88832	6.47628	10.1124	6.61768	7.62616	5.8019	6.25758	6.42742	6.8627	5.91028	6.30096	6.71924	6.53393	6.21351	4.99185	6.22926	6.1537	5.02074
NXPH2	4.28e-15	6.85731	5.53759	6.69568	6.63586	6.46687	6.59004	6.79015	6.88541	6.52554	7.03231	6.71696	7.34139	5.99728	6.60719	7.20156	7.61776	6.69301	6.19284	7.97004	6.97963	7.27513	6.70068	6.75089	7.01551	6.29851	5.59754	7.32519	7.02904	7.23681	6.93788	7.22989	6.67421	6.72952	7.00142	7.30613	6.28758	6.84374	6.23821	6.9313	5.49372	6.59721	6.20961	7.10341	6.66995	6.40546	5.86679	6.04011	6.16543
CLEC4G	4.29e-15	4.31465	3.6134	3.60948	4.28288	3.94537	3.47418	3.92581	4.24982	4.02238	2.35127	4.25219	6.45568	3.16054	3.37114	4.82478	5.9253	5.40506	3.88235	5.38595	3.89457	3.24529	3.83967	3.49014	4.47814	3.76566	3.33628	6.2376	6.23324	3.58853	6.23844	4.94708	4.44197	3.29017	4.20163	7.3503	3.67507	4.14934	3.71931	4.0058	3.59473	3.39383	4.42188	4.05642	3.7064	3.83752	5.25467	4.43969	6.20377
HCN1	4.31e-15	7.18487	5.45457	7.39172	4.12173	6.84673	7.0071	5.56782	5.25036	5.43831	7.21908	6.58903	8.20471	5.90649	5.81396	8.0184	9.5017	6.33524	5.71644	6.78665	6.06933	5.73707	6.96499	5.75853	7.1812	6.02923	6.6204	8.71658	6.78125	7.32805	6.56785	6.10775	6.04696	6.50625	6.8859	9.48849	5.88641	5.75464	5.50288	5.78722	6.58344	7.21433	5.71014	5.66702	6.79077	5.88315	7.50402	5.85732	6.21106
UNC5D	4.34e-15	8.06859	6.87064	7.49829	6.65845	7.26413	7.35349	6.85302	6.35093	7.50576	9.64983	6.99075	8.33855	6.93984	7.98505	8.98874	10.133	7.39046	6.58331	7.19822	5.89839	7.17774	8.90468	6.96432	7.64625	6.09366	5.39608	9.14508	7.71192	8.81086	8.47651	8.91609	6.42009	8.20822	7.91765	9.66771	6.74806	7.04733	5.88414	6.19695	5.77112	8.24064	6.73737	6.10309	7.23404	6.0608	8.18606	6.67941	6.22127
PDE2A	4.43e-15	10.4467	9.14787	10.0338	8.02272	9.3898	9.76444	7.69984	9.14215	6.71808	10.2067	10.1775	11.057	7.88481	8.79052	11.057	12.0133	9.71762	8.66187	10.1627	8.38867	11.1302	9.70925	7.08454	10.6041	9.91952	8.56318	11.292	9.87341	10.0115	7.52272	8.45216	9.14565	8.74133	9.96148	11.744	8.27966	7.12294	10.8493	7.09001	8.65297	9.97029	9.43734	7.53274	9.28222	9.80413	9.84135	8.49286	8.16995
HMMR	4.44e-15	8.83504	8.63296	6.95	8.72682	6.23867	8.88628	8.69527	10.0092	7.48689	7.57081	6.92871	9.40009	8.59416	7.16326	6.93736	4.22132	8.15456	9.30496	7.96141	8.53123	7.86776	8.43338	7.7709	8.28495	8.76951	8.95008	7.92067	9.14367	8.43423	8.86493	8.73769	10.0966	9.06399	8.82889	6.88156	8.59361	9.20947	7.10366	8.56549	9.18817	8.17857	8.06156	8.7627	8.02552	9.05937	8.11926	8.55919	8.23122
PROS1	4.48e-15	10.3046	11.2997	10.9484	10.2969	9.96699	9.92299	10.4333	10.3168	11.1242	10.2172	10.5262	9.52685	9.5686	10.4034	9.01411	7.79749	11.4415	11.9834	11.2877	8.56642	11.4582	8.36694	11.297	10.3737	9.31262	11.8477	10.5949	11.756	10.0631	10.0566	8.65975	12.0828	10.6573	10.3476	7.74493	11.4273	10.7279	12.1071	11.5497	11.936	11.0356	11.5817	11.2365	11.2426	10.6838	10.5206	11.4373	11.3103
SH2D5	4.5e-15	8.11981	7.03887	7.36902	6.22139	7.58543	7.53274	7.40684	7.23534	7.37935	8.0194	7.4808	8.69267	7.00856	7.51041	8.61802	9.94738	7.79399	7.59133	7.994	8.22805	7.62663	7.77767	7.91293	8.09617	7.58815	7.44361	8.68156	7.87718	7.19706	8.51894	7.27695	8.25803	7.41815	7.70637	9.71929	6.93845	6.42164	7.36615	6.84538	7.51188	7.62467	6.74012	7.63327	7.52688	6.85568	8.03793	7.06644	7.70294
PDPN	4.55e-15	10.1969	10.5665	12.8065	10.9346	9.58925	9.97816	10.9003	9.71706	10.6226	10.7548	5.70627	10.0857	11.584	9.67051	6.52325	6.29917	11.9284	10.7317	10.4407	11.1104	9.85393	10.1949	11.5707	8.30192	7.72182	11.842	8.69101	10.3189	9.62866	10.6625	11.0502	9.63672	8.50489	9.17085	6.6781	10.4116	10.0541	9.31938	10.5669	11.5639	10.8749	6.01826	11.2877	10.422	7.91861	10.0008	10.7211	9.97405
KLK7	4.56e-15	7.95717	6.84247	7.9221	7.99577	7.41514	8.22146	7.88356	7.35157	7.7884	7.47511	8.33539	8.69488	7.73673	7.65024	8.23122	8.52854	6.98123	7.37391	7.71558	8.02075	8.12146	7.3604	7.66963	7.99591	7.66883	7.90943	8.10039	7.79386	7.79901	7.54134	7.67894	7.62838	7.62333	7.94443	8.63365	7.69461	7.994	7.48777	8.06626	7.01339	7.21224	7.69935	7.99941	7.55588	7.25475	7.5698	7.80683	7.24879
FAM46A	4.61e-15	8.4447	10.0677	9.11954	10.462	9.22742	8.70995	10.3058	8.77871	8.78714	9.48169	7.9904	7.27395	8.85145	9.24372	7.16704	5.26949	9.08887	10.8234	9.94263	10.2671	9.25328	8.72108	10.0495	8.55683	8.62438	10.2827	8.48638	9.06386	9.32025	10.6142	10.5842	10.3102	11.1396	7.42665	6.32836	9.7561	9.88432	9.71558	9.83274	10.3888	9.51152	9.30841	9.44483	10.7526	8.21122	8.2575	10.0043	10.2658
LOC100506563	4.73e-15	7.5734	6.31844	6.71954	7.03049	6.74012	6.51104	6.42915	7.0503	7.47484	6.70331	6.00782	8.46416	7.11835	6.5818	7.6204	8.72242	7.25475	6.78267	7.51765	5.80879	4.79204	6.23197	6.72952	6.68633	6.79505	6.53802	8.04019	6.8061	7.16056	4.0425	6.33943	5.79205	6.59412	6.95779	8.74767	5.69893	5.93395	6.39065	5.58251	6.41942	7.32143	5.96126	6.811	7.22195	6.86093	5.74699	6.74908	6.69554
NAGPA	4.77e-15	8.38125	8.84601	8.58752	8.47068	8.96063	8.16855	8.88207	8.07501	8.35827	8.89529	7.88291	8.07435	8.90623	8.35641	8.77623	9.10311	8.46983	8.61381	8.86577	7.82222	7.50846	8.28105	8.90366	8.41938	7.9694	8.04495	8.92571	8.04399	8.55081	7.74508	8.42329	8.42893	8.35434	8.01548	9.69863	8.43498	8.17423	8.88956	7.98052	8.80961	8.95382	8.36269	7.97208	8.25539	8.66199	8.91468	7.62589	9.7592
DNAJC6	4.84e-15	11.057	9.41752	11.9531	7.97103	11.7725	10.1738	8.63692	9.33455	9.27656	11.3042	10.4873	11.9694	8.58877	10.216	11.9953	12.401	10.618	8.19851	9.48971	8.61315	10.9148	10.4765	9.25605	11.2688	10.4797	9.39773	11.8525	10.2103	11.0046	9.12796	7.30741	8.64415	10.5113	9.9663	12.3659	8.55053	8.30973	7.91359	8.81497	8.05751	10.7366	9.90831	9.62146	9.98023	9.95872	10.8403	7.99963	8.55549
PAK3	4.85e-15	9.95802	7.13475	9.03619	5.68764	8.31266	8.65198	7.23953	9.3235	5.4039	9.67554	10.0036	10.8403	6.85715	8.38813	10.2687	11.7117	8.7108	7.60261	8.4614	9.23631	9.99608	8.31832	7.16823	10.1478	10.2176	6.9328	10.4736	9.36776	8.80365	8.75124	8.04033	8.66662	8.73866	8.94159	11.5388	8.47464	8.74431	9.0741	8.84507	6.07354	9.11782	8.78673	7.17666	8.50179	8.85397	8.85733	7.29236	7.18049
CACNA1E	4.88e-15	7.56232	5.10259	7.12753	5.14756	6.47027	6.25794	5.56457	6.14988	5.35771	7.05362	7.11034	8.21841	4.69057	6.63356	8.1397	8.86374	6.19944	5.3211	6.05071	6.14383	7.53485	5.94183	5.30739	7.23922	7.72928	6.04761	8.27513	6.23959	6.68252	5.92957	5.92425	7.88561	6.81484	6.87149	8.63336	6.00621	7.50402	5.23058	6.58873	6.11484	6.39097	5.63059	5.77236	6.48778	6.47906	6.75933	4.98392	7.10906
CLIP3	4.9e-15	10.0381	10.0838	10.2633	10.3418	10.478	9.90432	10.0713	9.94398	10.5071	10.3212	10.3127	10.9579	9.28582	9.68658	10.4924	11.3885	9.76075	9.22655	10.1682	10.1072	10.2957	10.8041	9.77108	10.5344	10.4642	10.0642	10.504	10.2889	9.89228	10.2573	10.4741	10.2872	9.65012	10.209	11.7199	10.1621	8.9829	8.90765	10.5016	10.0083	10.213	11.043	10.0359	10.5877	10.2578	10.2496	9.67343	9.8063
RAPGEF4	5.21e-15	11.6945	9.10221	10.2711	9.316	8.88219	9.93262	9.39639	9.86278	8.56751	10.5504	8.55026	11.2728	9.21028	9.35313	11.9677	12.1393	9.01881	8.35249	8.31392	7.83602	9.67695	9.77856	7.87666	10.6286	10.8735	8.05021	11.6219	10.4058	10.1072	7.60167	9.43677	9.90956	8.99275	9.56793	12.4611	9.92386	8.23351	11.5155	11.0371	8.81682	9.84753	10.6242	9.29839	7.32411	10.0014	9.99134	9.38924	7.08268
C15orf27	5.28e-15	7.36785	7.26357	7.58042	6.75699	6.81854	6.76934	5.8675	7.55069	7.41928	7.66145	7.09369	7.07079	6.27712	7.5921	7.50074	7.76177	7.2093	7.17189	7.8612	7.83072	7.72728	7.45736	7.6971	7.6337	6.80441	7.20178	7.75126	6.94068	7.34162	7.20621	8.20732	7.00976	6.91848	7.96214	7.5421	6.86144	6.78854	8.18756	7.45463	7.39159	7.8369	7.31151	6.64993	6.76537	6.71893	7.39252	7.19175	6.9755
TUBB4A	5.3e-15	11.5258	8.55106	12.0354	8.38343	12.0317	10.3392	8.0179	11.3301	8.22567	10.8306	9.37973	11.8053	8.14849	11.4135	12.0844	12.2109	9.53012	7.6884	9.1553	9.15166	10.6035	10.5954	8.32526	11.1418	10.5684	8.51392	12.094	10.7548	10.0401	8.47717	8.00005	10.2662	8.83188	9.79286	12.3778	8.88639	9.44661	7.87871	8.73784	7.97642	11.5293	9.7125	9.39972	10.0995	10.3228	10.7152	8.3833	8.93256
CAP2	5.34e-15	10.2492	10.3985	10.1204	9.74687	9.47304	9.88259	9.85901	10.3561	9.56199	10.052	7.59667	11.4282	10.3196	10.0338	10.6942	12.1446	10.0785	10.1058	10.0366	8.14307	8.79296	10.0822	9.74672	10.525	9.49306	9.81156	11.4727	10.3949	10.7222	9.35546	8.45425	9.64473	9.65289	10.6931	12.1548	9.17276	10.0416	9.34557	10.7568	9.94129	9.83998	9.74637	8.69254	10.0634	8.92406	10.0872	10.0539	9.33711
PNMAL1	5.39e-15	11.5874	9.83205	10.8816	10.9003	11.1402	11.0093	11.3355	11.0275	11.4023	11.6253	10.6701	12.0882	10.7537	11.4992	11.8463	13.0042	11.5175	9.19053	11.314	10.9681	11.8184	11.8494	11.2902	11.7688	10.6936	10.1166	12.2268	11.0451	11.4311	9.91746	11.6597	11.0952	10.9544	11.4772	12.5328	10.8588	10.3607	10.2681	11.286	11.603	11.1923	10.9824	10.9481	11.021	11.3495	11.0253	10.8892	10.9681
VAT1	5.54e-15	11.6757	11.5155	11.4522	10.7704	11.0458	10.9092	10.5161	12.5166	10.6651	10.9099	11.0898	11.1742	12.1264	10.7648	10.4425	10.4467	11.8525	11.4815	11.8216	11.6993	11.3067	11.2979	11.7672	11.7938	10.9187	12.2049	11.3131	11.1968	10.5079	10.7322	10.8052	11.414	11.4794	10.8081	10.2309	11.4253	11.4447	12.2131	11.9934	11.5198	11.1944	12.5534	11.1742	11.4914	12.136	11.3416	10.7981	13.5073
HDAC11	5.6e-15	8.91017	7.64112	9.26458	7.85576	10.0537	8.05971	6.91485	7.16404	7.41117	8.84744	8.21162	8.57371	7.85417	8.88047	10.276	9.91365	8.21148	7.29547	8.81682	7.54482	7.96642	8.30077	8.26846	8.38138	8.54509	7.66204	8.66092	7.31647	8.80724	7.72848	6.91309	7.55125	7.53444	7.37576	10.097	8.18117	7.12501	8.39862	7.8157	7.40157	8.98376	7.57967	7.82093	8.76571	8.63806	8.38674	8.00164	7.62056
RFPL1S	5.6e-15	8.78524	6.75158	9.45752	2.53692	8.68144	8.04084	3.7483	5.50867	6.90263	8.97132	9.91594	9.73264	5.56634	7.66204	9.65706	11.0266	7.20299	6.80009	7.28321	5.70755	6.40849	8.44368	6.62233	9.33111	6.8119	5.83129	10.3914	7.70484	8.12454	5.18903	5.5919	1.97838	7.18644	8.25522	11.1578	6.76117	6.07318	6.13801	6.98306	5.91997	7.97075	6.86521	6.1834	6.91373	6.52875	7.85991	6.55879	5.73022
SERP2	5.85e-15	7.06298	7.0568	7.24937	7.09606	7.85948	6.98525	7.52612	7.20918	7.69362	7.16898	8.16463	8.11826	7.24774	7.53888	8.24646	8.87776	6.97562	6.57765	7.0475	7.44114	7.20286	7.52026	6.93912	7.41528	7.6297	7.19534	7.41021	6.96356	7.1948	7.50872	6.76465	7.03602	7.44275	7.39864	8.34036	7.20474	6.67941	8.02552	7.47399	7.23061	6.8647	7.47182	7.57804	6.75273	7.36274	7.21974	6.67331	6.98799
RAB11FIP4	5.89e-15	9.03539	5.24133	9.30386	5.15196	9.72063	8.14916	6.58388	7.29412	5.51601	8.68583	8.4299	9.65261	7.27383	8.41174	10.0941	10.0545	7.81478	6.16126	7.45241	7.88952	8.44141	7.27807	5.94952	8.86565	9.04363	5.56611	9.25133	7.86533	8.54793	5.76572	7.94713	7.74808	7.29371	8.60461	10.5066	8.07145	6.60466	5.197	7.31227	7.06502	8.58586	6.93411	7.26154	7.11073	8.14813	8.52988	6.41052	7.44098
HLA-F	6.04e-15	11.3706	12.626	11.5124	12.1089	12.2871	11.3022	11.9819	11.3962	11.292	10.6969	11.1686	11.2188	12.2871	11.616	10.403	9.92986	11.9953	12.094	12.2776	13.3735	10.9557	10.486	12.3559	11.2188	10.6739	11.8554	11.0178	11.8825	10.998	10.6103	11.5088	11.3058	10.7012	11.1523	9.79181	11.2333	10.8601	12.115	12.1548	11.3022	10.994	10.803	11.8584	11.8274	11.498	11.7925	11.0648	11.2203
MKI67	6.06e-15	8.58586	8.67821	7.73	9.19904	7.44983	8.75739	9.31794	9.77506	8.34567	7.65533	7.59667	9.20694	8.67086	7.69402	7.14207	6.95165	8.09306	8.84347	7.89679	8.88876	8.61061	8.75428	8.1906	8.6417	8.9002	9.27601	8.09423	9.0133	8.83692	8.74356	9.35285	9.446	9.25328	9.34027	7.25448	8.77007	9.566	7.76024	9.18594	8.97769	8.18672	8.25724	8.95994	8.07683	9.02487	7.83564	8.55646	7.7664
KIF17	6.07e-15	6.69599	4.84065	5.60136	4.89895	4.89247	4.63456	4.89177	3.99392	5.17273	5.17225	4.6556	6.32336	5.18267	5.2698	7.17684	8.18865	7.34798	6.91454	4.02238	6.48193	4.49862	5.38182	5.41684	5.13809	5.82901	4.46371	7.79666	4.85088	5.77035	4.42102	4.18397	4.67679	6.36358	5.74227	8.32283	4.35038	4.40152	6.82332	4.44737	4.64806	6.37467	4.65479	5.62585	5.06378	5.48831	6.70846	6.21498	6.77803
ATP6V0A1	6.28e-15	11.0059	10.4656	11.0614	10.8749	10.8639	11.2374	10.1234	10.9932	10.6436	10.7449	11.5519	11.7117	10.652	11.0818	11.2196	11.9548	10.7449	10.0066	10.8841	10.8176	10.7078	10.5684	10.6081	10.9099	10.4664	10.5745	11.591	10.6526	10.1794	10.047	11.0481	9.95642	10.5392	10.9925	11.77	10.5616	10.0455	9.58983	9.80686	10.173	11.0142	10.5216	10.4038	10.3131	10.4139	10.7382	10.4591	10.7211
ATP2B3	6.29e-15	7.68733	6.03386	8.12897	5.5522	6.43175	7.47346	4.70136	5.82005	4.98571	7.94907	7.61024	8.56591	5.88244	5.64335	8.46819	9.96465	6.74012	5.1816	6.43175	4.41341	5.40894	6.53735	4.49113	7.25043	5.45108	4.94187	9.32516	7.35723	7.04198	5.91928	5.73787	5.58342	6.00912	7.55859	9.68107	5.45749	5.22064	6.18591	6.25851	5.62805	7.39596	4.85216	4.07286	5.90808	7.1209	7.43799	5.87461	5.58625
POFUT1	6.31e-15	6.98714	7.19706	6.11741	8.59631	6.48381	7.31336	8.04645	7.53623	8.57792	6.95881	7.34727	7.1946	7.44288	7.65985	6.16763	4.66321	7.27001	8.15067	7.31717	8.3483	7.07254	7.59642	8.38179	6.85063	7.20732	8.35901	6.16719	7.41542	7.13611	7.37404	7.72058	7.77229	8.08275	8.07597	6.50861	8.01867	8.37524	7.8552	7.64035	8.39678	7.20203	7.89343	9.3146	7.6297	7.94826	7.29412	7.70781	7.91084
CLTB	6.33e-15	9.50236	9.64	9.45476	9.16789	9.40315	9.79878	9.27627	9.66771	9.51625	9.71344	9.82874	10.1586	9.42298	9.55729	10.2149	10.6969	9.17213	9.6983	9.79738	10.0213	9.1092	9.91626	9.53497	9.68072	9.24252	9.47466	10.3661	9.55576	9.53153	9.54532	9.13851	8.96252	9.06075	9.76203	10.7521	9.54809	9.1218	11.598	8.32884	9.43084	9.83035	9.53407	9.55282	10.3679	9.48292	9.98223	9.3224	9.54265
RBFOX1	6.34e-15	9.6931	7.31781	10.3505	7.26609	8.65558	9.7947	6.89241	7.45975	6.86728	9.66032	7.91638	11.3733	7.07606	8.63446	10.2313	12.2494	8.87877	6.79096	9.10134	7.80942	7.96523	9.18991	7.2498	9.88162	8.17702	7.6668	11.5958	9.35077	8.83214	7.66349	7.49221	7.32885	8.23482	10.1246	12.103	8.04274	7.53381	7.57747	8.2219	7.40427	9.70709	9.07666	7.35485	8.36823	8.19707	9.22668	7.3735	7.20178
STK32C	6.4e-15	8.38179	8.1113	7.95472	7.13775	8.36309	7.98687	7.08928	8.14507	7.85214	8.53387	8.79689	9.48775	8.36606	7.66867	8.73356	9.20989	8.0249	7.9963	7.8133	7.73475	8.36418	8.14144	8.22384	8.87999	8.26831	6.96715	9.00051	8.4465	8.45295	8.44104	7.92135	7.1614	7.69082	9.26664	9.50036	8.79701	6.82022	6.51076	7.81857	8.00229	7.97297	8.50584	7.00214	8.76939	8.18561	8.20544	8.13186	7.36798
IQGAP2	6.67e-15	8.28893	9.3784	7.95266	9.10662	8.28587	8.39849	9.61903	8.92571	8.85329	8.21806	8.80614	9.50292	8.92546	8.07567	6.5133	4.15742	8.08711	8.83634	7.77912	8.19707	7.73903	8.73432	9.00088	8.09959	7.45048	8.26065	7.78977	8.8963	8.51576	9.42643	8.2591	10.2099	9.43592	8.44728	5.56514	8.90954	8.88207	7.65256	7.74464	8.23855	8.59981	9.52556	9.08403	7.6238	8.53208	8.30397	8.95978	8.42106
GNG12	6.89e-15	10.1162	10.58	9.8238	10.123	10.2513	9.68009	9.91701	10.1919	10.1933	10.0066	8.87668	9.57681	10.5091	10.0769	8.93704	8.99804	10.5626	10.9296	10.383	9.34587	9.9859	10.2868	10.442	10.4053	10.0803	10.8934	9.91905	10.6201	10.4223	10.583	10.093	10.526	10.6186	10.0342	8.71957	10.216	9.7125	9.7877	10.4915	10.3585	9.88127	9.7044	10.0645	10.5419	8.79961	9.83697	10.5278	11.3214
HID1	7.15e-15	7.69203	7.76418	8.39214	7.5921	8.434	8.0363	7.16235	7.93667	6.97589	7.57137	6.71564	8.13622	7.12613	7.9808	8.35901	8.40697	7.36888	6.7333	7.92432	7.5724	7.8208	8.09935	7.39553	7.94713	7.79502	7.31037	7.49343	7.79412	7.45227	6.61013	7.83178	7.65691	8.21367	7.32489	8.66729	7.58531	7.00229	7.54975	7.65985	7.47772	7.94957	7.88614	7.8481	8.01065	7.76903	7.82385	7.50263	7.90525
NEGR1	7.16e-15	9.16789	5.73956	9.18057	7.59849	8.09198	8.91134	7.75355	6.38063	6.96844	8.25474	7.62467	9.77753	5.2532	8.6692	9.26528	10.8138	7.45189	6.47315	7.21067	5.4056	7.35373	7.61045	6.23994	8.23098	7.78923	5.23928	9.95727	7.57937	7.97656	5.58951	7.37548	5.98984	8.24131	8.31045	10.4038	9.03325	7.95306	5.57332	5.92381	5.67708	8.06591	7.33599	6.2995	6.79657	7.50646	8.11427	6.90423	8.30667
ABCG4	7.22e-15	7.31074	7.17262	7.63385	7.58457	7.4514	7.09032	6.99476	7.91696	7.62369	6.97151	7.39288	7.95897	6.69023	7.12894	7.70966	8.20162	7.26319	7.41721	7.75578	7.50831	7.09217	7.68032	7.42516	7.93971	7.40493	7.42665	7.8683	6.65845	7.64161	7.82303	7.86479	7.82868	8.28508	8.05371	8.64502	7.00915	6.71908	7.82668	7.42955	7.37142	7.68733	7.72058	7.27039	7.56012	6.62793	7.67907	7.13638	7.44098
MAL2	7.23e-15	8.54782	2.20977	8.4175	3.97936	6.97318	7.95293	6.30068	2.50657	3.19606	8.16377	6.68949	9.87144	4.87709	6.72203	9.74847	11.0157	7.25083	5.28678	7.40299	5.19453	5.21213	7.21419	6.09265	8.64862	5.97261	6.1103	10.4525	7.74219	7.37338	5.49648	6.29539	3.25028	9.17754	8.47916	11.0192	5.19222	4.16673	5.32421	5.01506	5.25496	7.42757	3.13816	5.81396	6.8687	6.00579	8.4345	6.13873	6.11063
CELF4	7.48e-15	8.27401	5.94259	7.57067	6.32678	7.37312	7.80971	5.90765	6.5261	5.64162	8.00584	8.338	9.58186	5.38018	7.25134	8.55982	9.84291	6.97489	6.25006	6.96179	6.65204	8.24739	7.49009	6.30768	7.98434	7.49732	6.23703	8.9669	7.49583	7.7538	5.87295	6.66004	5.98877	6.46763	7.86132	9.65735	5.49265	7.10524	5.63059	6.04536	5.95355	7.61776	5.74449	5.66586	7.14939	6.03145	7.86193	6.52217	5.64429
FRMPD4	7.52e-15	7.94907	6.52736	8.21688	5.968	7.32356	7.45214	6.3842	6.32678	6.01054	8.31897	5.5357	9.08181	6.69787	5.91755	8.60156	9.83205	6.76465	6.5037	7.26723	6.56087	5.65367	6.94768	4.73266	7.86147	5.89218	6.70639	9.07088	7.49452	7.4234	6.19633	6.64299	7.20045	6.69539	7.61802	9.9292	6.42446	4.82329	4.38827	6.29463	7.29236	7.27001	5.01222	6.20491	7.2541	4.40442	7.59629	6.65572	5.27085
AKAP6	7.53e-15	8.22103	7.5642	8.27344	6.7802	7.62208	7.42539	7.34221	6.8444	6.96078	7.7993	8.74676	8.45707	7.51497	7.26027	8.65488	9.33698	6.98045	6.68286	7.59275	7.02032	7.79319	7.79625	7.2381	8.13958	8.53622	7.62651	8.47605	7.6136	7.7895	7.58851	7.58773	7.27766	8.22469	7.68947	9.06827	7.8494	7.34545	6.99504	7.43647	7.60894	7.75461	8.3787	7.50732	7.50168	7.575	7.53459	6.73041	7.13069
UBL7-AS1	7.66e-15	6.17706	6.67144	6.98045	7.4447	6.8294	6.09115	7.57804	6.52967	6.92961	6.07337	7.13517	6.66321	6.85254	6.40134	6.9328	6.28131	6.65602	6.44855	7.03769	7.42433	6.77922	6.39456	6.2995	7.41328	6.55089	6.88752	6.6689	7.37251	7.67348	5.64429	7.58707	6.51764	7.71414	7.51064	6.12002	6.75304	6.89274	7.09069	7.29974	6.91149	6.95355	6.71028	7.14289	5.59754	6.88293	7.1555	6.8119	5.86423
ANKRD34A	7.69e-15	7.85963	4.91503	7.95772	5.54211	5.2663	5.37183	7.75461	6.9456	4.74925	7.57844	4.76914	9.09509	5.07859	7.49718	9.32488	9.62178	5.97982	3.81	6.81747	5.00483	5.0723	6.25776	4.8939	6.04249	6.93881	5.34488	8.88414	7.80118	7.64586	5.05337	5.32285	5.31564	8.53784	7.82868	9.97307	6.18016	5.35079	6.98399	5.02233	6.59192	8.0879	4.57095	4.64025	6.46865	7.51449	7.25242	4.25178	7.43949
LOC100129973	7.75e-15	3.45022	3.1028	3.3744	2.19456	2.65155	3.11911	2.50042	2.53315	2.18539	3.55467	3.24314	2.79036	2.37135	3.92825	3.26033	3.0273	4.30839	2.14437	4.09109	2.77782	3.23242	2.29536	1.9013	2.52277	2.22728	3.02503	2.29109	2.32675	3.20054	2.86753	2.68493	3.54561	2.55508	2.71845	5.26204	2.35636	2.86753	2.76267	3.01543	2.28659	2.55404	2.77691	2.04693	1.8488	2.89819	4.67713	2.89705	2.42264
CACNG8	7.88e-15	7.1202	6.86188	7.13154	6.64512	5.95831	6.57831	7.46216	6.3471	8.11695	7.2148	7.53049	8.34318	6.8306	6.48141	7.24399	8.41041	6.99818	6.84615	6.57468	5.69849	6.8306	7.62728	7.18078	7.27546	6.88003	6.97291	7.87706	6.64671	7.17652	6.917	7.13111	6.77889	7.13675	7.5607	8.62663	7.85552	6.18868	7.02805	6.72276	6.77852	7.32869	6.79324	7.57209	7.15328	6.27694	6.77596	6.87539	6.96356
RTN4RL1	7.88e-15	7.55601	7.14472	7.08815	6.68851	6.39081	7.84308	6.62592	5.6406	6.84538	7.44954	6.15349	8.01827	6.15841	5.61702	7.85677	9.078	6.96408	6.71043	7.67459	6.59004	6.55379	7.34444	7.60284	7.07242	5.93788	6.94227	8.89969	6.85548	6.95165	6.06891	5.96303	6.72873	6.71794	6.98658	9.11457	6.92994	5.46464	9.02487	6.52376	6.56963	6.54691	2.50657	6.811	7.43865	6.94068	7.00602	6.57704	7.03715
HPRT1	7.99e-15	9.89894	9.96758	9.84149	9.78106	9.08627	9.77043	9.92001	9.04815	8.5602	9.96088	9.17714	10.4017	9.08235	8.99387	10.1504	11.4023	10.3897	10.6211	9.541	10.4134	9.11219	9.10397	9.17126	9.83833	8.95514	9.43351	10.9818	9.69206	9.67589	9.44307	8.57143	8.89893	9.66487	9.73526	11.3456	9.59165	11.2188	9.76556	9.30991	9.53187	9.98865	9.11045	8.92559	9.50512	9.36351	9.96186	9.49714	9.31517
PNMA6A	8.15e-15	8.88891	4.76305	9.08627	8.41843	8.74948	9.09249	8.25854	7.73958	9.12341	8.76235	9.06263	10.0713	8.45774	9.11084	10.0516	10.8403	8.12057	7.29752	8.37603	9.96148	9.2234	8.91417	8.1751	9.37863	9.05086	8.19189	10.1872	9.28142	8.7737	8.7218	8.88467	7.08454	8.39038	9.67394	10.6147	8.44728	8.59322	9.49697	8.23426	6.83297	9.14367	7.81617	8.03154	9.51555	7.90539	8.63192	8.95514	7.91238
MFSD6	8.26e-15	10.2	8.94338	11.0371	9.28625	10.7941	9.27328	9.14238	9.72576	8.29425	9.94004	10.8096	10.4938	8.65174	9.77108	11.0107	11.3031	10.4058	9.79286	9.12156	9.48156	9.73526	9.82411	8.67612	10.1202	10.1242	9.33195	10.7735	9.46898	10.0674	8.22903	7.35044	8.75271	10.0094	9.19808	11.2722	8.79122	9.19391	10.6477	9.05697	9.3652	9.96791	9.5382	9.63329	10.0537	9.71558	9.49199	9.1092	10.254
SYT16	8.26e-15	8.25394	6.80537	7.57382	7.98714	6.64151	7.13945	8.47539	7.91359	6.92304	8.63469	8.6884	9.63702	6.17136	7.48016	9.53979	10.5786	8.43388	6.23212	7.787	7.35225	7.85758	9.23767	7.25514	8.83312	9.23086	6.89816	9.77562	8.13252	7.52204	8.7535	7.11678	7.47061	9.21944	7.02775	10.5396	6.97112	7.63215	6.20909	7.74532	7.58666	8.27542	6.86445	7.65141	6.89953	7.8531	7.68655	6.17331	7.07724
SRCIN1	8.29e-15	8.8616	6.16677	9.56843	6.10677	9.75977	8.10915	6.84324	7.63859	6.16784	9.0839	8.65743	8.97477	7.15674	8.39637	9.82411	9.64502	7.64639	6.15761	7.48093	7.33804	10.0441	7.29086	7.1182	8.96835	8.3739	6.50173	8.80739	7.6317	7.90127	6.92791	7.14879	6.37737	7.22949	7.92952	10.1621	6.65488	5.59999	6.16067	6.83795	6.32149	8.38624	6.83121	7.26215	7.11344	8.32157	8.23085	6.40392	5.52224
SPTBN4	8.42e-15	7.60763	6.835	7.10245	6.73105	7.0071	6.95609	6.8449	7.28347	7.67919	7.74299	6.99598	8.38255	6.6161	7.55437	7.42784	8.57007	7.18971	6.9313	7.11986	7.15125	7.06846	7.86183	7.15276	7.15103	7.54921	6.97651	7.84451	6.93529	7.12129	7.78293	6.5951	7.45491	7.12193	7.47634	9.01989	7.7144	7.32206	7.57657	6.25228	7.3521	7.86451	6.99818	7.37877	7.04198	7.42066	7.82852	7.03738	7.5715
LOC401442	8.84e-15	7.3097	7.12528	6.67641	7.43464	7.14911	6.74602	7.20447	6.71578	7.13285	7.42475	7.0065	7.8818	6.67721	6.68756	7.4215	8.45887	7.34139	6.89421	7.59096	6.79015	7.36949	6.46342	7.47484	7.35762	6.69568	7.55998	7.67426	7.55293	7.26425	6.98259	7.307	6.83514	7.23182	7.33484	7.91957	6.0712	7.3111	6.70525	6.56498	7.28677	6.38881	7.16072	6.88621	7.37946	6.48474	6.98173	6.41847	7.22665
LRRTM1	8.88e-15	7.92432	7.48856	8.0846	7.96875	6.71622	7.94946	7.43852	8.70422	7.47893	8.2187	9.26625	8.78273	7.60736	7.72728	8.962	9.08709	7.43277	7.09688	8.46102	7.61974	8.59993	7.57978	5.37649	8.11745	8.39991	6.91949	8.73012	8.00549	8.1031	7.57989	7.41354	7.95517	8.62947	8.18341	8.94615	7.36666	7.91971	7.93165	7.54251	7.44903	7.00299	8.39377	7.33162	7.7084	7.83191	7.68947	7.57109	7.47729
TARSL2	8.9e-15	8.34962	7.99752	8.86629	7.55753	9.21699	7.74185	8.16015	7.90715	8.00175	8.42066	8.94658	7.6238	7.71414	8.57396	9.68413	8.68156	8.76774	7.95638	8.06435	7.38811	8.71091	8.3138	8.47889	8.11072	8.14958	7.31037	8.68694	7.76807	8.18961	8.27082	7.20488	7.26581	8.68371	7.34009	9.54618	8.06091	7.009	8.36442	9.46616	7.74077	8.2268	8.52505	8.10515	7.63819	9.12156	9.14622	7.95222	7.83675
ANTXR1	8.96e-15	9.10605	10.2268	9.12899	9.64593	9.47593	8.9385	9.45237	9.98865	9.71972	9.47652	9.87597	9.16197	9.60733	10.1834	9.40193	7.97867	9.43875	9.65174	9.46441	9.10742	9.06491	9.67425	9.23684	9.86817	9.68687	9.34027	9.44719	9.85704	9.60938	8.9002	9.6329	9.7649	9.24461	10.007	8.35615	10.157	9.43902	10.6344	9.97816	9.92986	9.45359	10.1291	9.51152	9.10716	9.97146	9.67077	9.86708	9.56413
DMTN	8.97e-15	10.6631	7.93082	9.57495	7.55885	9.18622	9.60647	8.27122	7.13006	8.45994	9.03539	8.86092	11.0363	8.03127	8.20332	10.4285	11.7172	9.20958	8.84758	9.24122	8.9342	7.42573	9.66953	8.0625	9.38164	8.05765	8.41588	11.2852	9.05169	8.56472	7.73475	8.05451	8.1031	7.46076	9.81769	12.0282	8.29655	8.04782	8.38726	7.42327	8.07796	9.94293	8.37603	8.33947	10.1903	8.36113	9.56571	7.65328	9.28372
HLA-DRA	8.98e-15	12.9543	13.3804	13.0591	12.3637	12.8696	13.3673	12.3583	12.8619	11.7831	12.7832	12.2384	12.5502	12.9361	13.0692	11.1876	10.4731	12.6922	12.9402	12.7642	12.2358	12.1427	12.2447	12.705	13.2409	11.914	12.4826	12.8736	12.1912	12.2847	9.58216	11.6956	11.728	10.575	12.2557	10.1641	13.3872	12.0547	12.5449	11.7952	13.4227	12.1247	13.3872	12.685	12.0687	13.4021	13.6545	13.1676	13.3114
SLITRK4	9.27e-15	7.12117	2.88131	6.8436	2.99041	5.48661	5.71414	4.73859	4.84828	4.33125	7.83446	4.59191	8.16855	3.88235	5.86703	8.53428	9.54924	5.45943	4.49563	5.47581	4.4291	4.51805	5.83763	2.74441	6.55089	4.73402	5.18475	8.32178	5.73888	7.39241	3.64336	2.76725	5.67917	8.68738	6.57132	9.02016	2.43669	3.73816	1.93017	5.3549	5.21478	6.68237	5.56027	2.76394	5.73571	4.90156	6.66742	4.45411	3.991
RUNDC3A	9.37e-15	10.3515	8.42879	9.7448	8.41349	9.12042	9.84034	8.41533	9.92986	8.05434	9.83017	10.4434	11.3031	8.18245	8.59495	11.3094	12.0029	9.09662	7.04282	9.30179	8.72353	9.3898	9.7643	8.09617	10.0474	9.56826	8.09249	11.3084	9.70504	9.39006	6.79096	8.5159	7.89439	9.18085	9.66921	11.7161	8.7985	7.90374	8.33	8.6889	7.17923	9.81769	8.68025	7.65942	9.31277	8.91803	9.67458	8.15721	7.6457
GPX8	9.39e-15	7.95222	9.19243	8.50201	8.34066	7.70219	8.75515	8.32731	8.11902	9.03565	8.17845	6.03719	8.14614	7.58018	6.86042	6.60915	5.75359	8.63934	10.1617	9.45359	8.63679	7.4808	6.40746	9.24798	6.99156	6.94713	8.43212	9.32765	9.29346	7.90666	8.70709	6.82234	9.0444	6.49587	8.60862	5.20705	8.601	9.39383	11.1727	6.60242	9.19891	8.76406	6.58661	8.91286	9.58996	7.06274	8.82618	10.0809	9.87161
GUCY1B3	9.47e-15	10.3576	9.29563	10.482	9.29346	9.27517	10.4249	9.36263	10.7029	8.98405	10.7168	9.58374	10.6557	9.49534	10.3543	10.8188	11.9711	10.0039	10.4227	10.5157	9.14129	10.1456	9.51713	8.83044	10.8035	9.27013	9.38868	11.5525	10.2482	10.3364	8.45565	8.65428	10.1619	10.0091	9.82616	11.7952	10.3295	8.98469	10.3825	9.97405	8.92922	10.1014	9.60071	9.58954	9.2716	9.55163	9.61638	10.4379	10.3009
GLS2	9.7e-15	6.45826	4.97343	5.2367	3.59931	5.58512	4.60687	4.41573	4.858	5.32208	5.12257	4.6309	6.8309	4.6827	3.68521	6.71028	8.50517	5.08579	3.6902	4.37019	4.58661	4.09816	5.20346	6.08977	4.81985	3.82906	4.58971	7.10422	5.73731	5.15138	3.91228	4.28033	3.28737	7.3583	5.498	8.24302	3.66941	4.63669	5.00715	4.82813	3.51328	6.04272	4.4715	3.74201	3.22697	4.44903	5.11585	3.67997	3.87833
KIF23	9.71e-15	7.22369	7.47372	6.09157	8.69101	5.40661	6.86128	8.34805	8.24078	7.46632	6.43375	5.56114	7.86999	7.20701	5.95446	5.93852	5.96212	7.01797	7.75705	6.97698	7.66623	7.30856	7.94325	6.87203	7.6786	6.91485	8.30397	6.96296	7.69616	7.85402	8.00594	7.86565	8.12568	7.54899	8.17818	5.85427	6.15541	7.51999	8.50611	8.00875	7.54731	7.00507	6.77199	7.66325	5.93201	7.98257	6.01729	6.95355	6.69638
NSUN7	9.8e-15	7.11046	6.69689	6.82658	7.92883	7.51364	7.15003	8.28649	7.14176	7.52853	6.33923	6.31943	7.11862	7.19019	7.63158	6.18852	6.07856	6.67059	6.44703	6.94949	7.36627	7.25545	7.49139	6.99777	7.03343	7.16072	7.23667	7.09673	6.90437	6.20868	7.1506	7.64242	8.21236	7.0799	7.59196	5.7298	7.21819	7.41542	7.33366	7.52065	7.75295	6.65923	6.84841	6.8684	5.79816	6.55446	7.0347	7.40657	7.68231
FAM64A	9.86e-15	9.23741	9.81802	7.92339	10.0488	7.75498	9.72544	10.117	9.92386	9.37694	8.56387	7.51088	9.84513	9.47945	7.86386	7.75768	4.95843	8.98215	8.97574	9.04193	10.3472	9.77856	9.82842	9.04881	10.0764	10.0958	9.84383	8.16389	9.79827	10.3434	8.77327	10.2074	10.7761	10.0815	10.3148	6.69412	9.46441	9.55604	6.91399	9.09385	9.39157	9.21593	8.88547	10.2469	8.80832	10.4026	8.75219	9.23215	6.66188
TUBA4A	9.98e-15	10.1654	9.85036	9.78674	9.0993	10.1341	10.8116	9.5069	9.57622	9.78658	10.5949	9.14883	11.3992	10.1093	9.22797	11.2208	12.039	10.4558	11.0356	11.5968	10.3303	9.64884	9.97542	10.4467	10.3329	9.94037	9.52387	11.9763	10.8493	10.1394	9.22922	9.30371	10.2973	9.75841	10.9932	12.1626	10.1641	11.2458	9.3596	9.96729	9.76236	10.1923	10.1456	9.9161	12.0477	9.47101	11.0952	10.0479	10.4966
KALRN	1e-14	8.8536	7.69737	8.67765	7.81	8.18781	8.23426	7.88393	7.51888	8.25002	8.64218	8.49968	9.17984	8.33662	7.54134	8.81574	9.85067	8.9716	8.68319	7.70885	7.95795	7.45401	8.40888	7.96751	8.61775	8.40059	8.25365	9.32621	8.12084	8.18469	8.46331	8.05926	7.77547	7.44825	8.7272	9.763	8.00335	7.77364	8.2691	8.05134	7.77283	8.49481	8.11266	7.9544	8.64626	8.14478	8.45925	8.47184	7.82209
NIPSNAP3B	1.01e-14	7.82766	6.92398	7.4179	7.37042	7.36405	7.76671	7.48624	7.9963	7.268	7.57538	7.16969	7.6131	7.12528	7.48495	7.74219	9.14802	7.84707	7.44528	7.38864	7.43138	7.45555	7.42615	6.5762	7.3546	7.27546	7.43545	8.29557	7.58042	7.43705	7.19562	6.88621	7.87064	6.99898	7.33804	8.51431	7.42573	7.23484	8.82559	6.97784	7.02919	7.38864	7.20031	6.99833	6.1103	6.99025	7.45529	7.51316	7.29852
KCNMA1	1.02e-14	9.22643	8.29789	8.98646	6.37485	9.41395	8.95103	7.07144	7.50646	8.33049	9.26197	10.2573	9.39986	7.56347	8.72242	9.24853	10.1672	9.14101	8.1628	7.91638	8.00365	8.15541	8.61545	8.00229	8.82419	8.2625	8.05837	9.60249	8.62595	8.86687	8.57778	8.50307	8.3454	8.88489	8.54219	10.1202	8.21637	7.574	8.67586	7.31864	8.37039	8.63524	7.80768	8.32342	9.43762	8.10768	8.31606	7.99577	8.47038
ATP6V1E1	1.02e-14	10.8763	10.5339	11.6337	11.076	11.5797	11.3377	11.2458	10.2504	10.8093	11.7888	11.1357	11.6844	11.0079	11.3248	11.8274	12.3064	11.7053	10.6976	11.3325	10.478	11.0956	10.8914	11.1653	11.5312	10.7492	10.8182	11.8809	10.652	11.3552	9.77719	9.89741	10.4839	11.4301	10.355	12.113	11.3786	10.8157	10.6201	11.4783	10.8555	11.314	11.073	9.89991	10.807	11.3364	10.9708	10.0521	11.9173
SHISA7	1.02e-14	7.15986	6.06603	7.54046	3.97936	6.60615	6.14812	6.09243	6.76465	6.05404	7.52853	8.90662	8.37777	4.04195	7.8818	9.19083	9.31277	6.93209	5.62028	7.65231	5.88362	8.3376	6.76797	3.7709	8.53466	8.68939	6.15033	7.26885	6.50876	8.01026	6.46151	3.83719	8.35773	8.48546	6.50189	9.51625	6.08838	5.50446	6.3188	6.20181	5.55366	6.20431	6.37088	6.48602	6.47987	7.08734	6.17841	5.73145	6.13152
CYP26A1	1.06e-14	5.33014	6.23584	5.53631	6.26759	5.41529	5.8203	5.3836	5.1155	6.1194	5.73495	5.54586	6.70791	5.76572	5.43315	5.97289	8.3	6.13399	7.83807	5.27967	6.03434	4.62503	7.6645	5.71536	5.7337	5.56159	6.07776	5.44474	4.91843	6.62025	6.85241	5.16215	4.93667	5.28716	5.63144	6.79611	5.44562	5.67995	5.63869	5.25102	5.47423	4.5659	5.39417	5.5534	7.08352	5.75936	4.80824	7.92773	5.84966
SGSM1	1.06e-14	8.48426	7.16252	8.38012	7.16982	7.79541	8.14744	7.51202	6.52746	7.61242	8.20531	9.12127	9.06005	7.06601	7.74524	9.38032	10.2798	7.45633	7.12249	7.94232	7.83446	7.51917	7.88983	7.22369	8.00414	7.37277	7.32411	9.34083	7.89665	7.93791	7.60334	8.1813	7.96259	6.99354	8.17897	9.8033	8.38255	7.54591	7.63028	7.99501	7.6604	8.09387	7.64698	7.12177	7.49108	7.05691	7.75895	7.69763	8.12244
NDRG3	1.08e-14	10.5016	9.97146	10.9708	10.5298	10.3888	10.1726	10.5216	10.9478	10.0073	10.6531	10.8914	11.1066	9.39471	11.1234	11.2501	11.5684	10.0356	9.35346	10.3476	10.3708	10.2934	10.6811	9.62424	10.5983	10.1617	10.042	11.3846	9.92316	10.1448	10.1938	10.9224	10.4129	11.0689	10.7969	11.6313	10.2768	9.76413	9.99833	9.83759	9.67173	10.179	10.6799	10.6816	10.6196	10.2683	10.8228	10.057	10.1699
FAM13C	1.08e-14	9.25311	8.39187	10.4422	7.73333	10.5344	8.80327	7.68601	9.446	7.85795	9.93701	10.429	8.68878	7.73575	9.81419	10.9124	10.4232	8.25423	8.66979	7.16427	6.96356	8.35589	9.47073	6.69751	8.85975	9.49116	8.29704	9.58912	8.13401	9.42966	7.96228	8.60037	8.05777	8.68066	8.23581	10.3765	8.74691	8.34036	7.0451	8.17434	8.26359	9.00022	8.72556	8.60474	7.37238	9.07811	8.97918	8.50759	8.13509
SAMD9L	1.09e-14	8.9554	9.6931	9.35546	10.0896	9.99666	9.88361	10.0581	9.00477	9.18704	8.85037	8.12146	8.9152	10.1977	9.61087	8.1241	7.44903	9.18131	9.42098	10.3901	8.2839	7.96913	8.45802	9.24173	8.39107	8.92546	9.92386	8.89193	8.13065	9.18009	9.46301	9.31822	8.38648	7.84103	9.70892	7.5921	9.73041	9.63343	9.78736	8.36569	10.3717	8.99105	8.79311	8.79744	9.97046	7.91068	9.68781	9.15805	9.1774
KCNJ9	1.09e-14	8.51073	6.52566	8.85329	5.69066	8.79017	5.64553	6.58704	7.15664	4.94868	8.11991	8.27029	9.05181	5.74529	7.59374	8.93206	10.0619	7.16493	3.73772	6.71467	7.21894	6.79096	7.68102	6.38822	7.72893	7.45447	6.54367	9.1379	6.96141	7.84956	6.09136	5.87295	5.30674	6.74843	8.18902	9.9443	6.12989	5.9714	5.64354	6.07282	5.61835	8.03362	7.46964	7.09231	7.04763	8.53237	8.23266	6.00003	6.34601
CXCL16	1.11e-14	10.58	11.2722	11.4935	9.26992	10.934	10.1166	9.50554	10.4116	10.3353	11.3076	9.48604	9.72063	10.8331	11.3015	10.3554	9.19323	10.7002	10.5726	10.5469	10.5857	11.0999	10.0089	10.8507	10.1252	10.504	9.99098	10.5883	10.3261	10.7494	9.25633	9.49148	10.466	9.97146	10.2982	9.45517	10.4462	10.1407	9.05765	9.79441	10.1754	10.0595	10.0655	10.5522	11.086	10.3773	10.4669	10.6118	10.3965
KCNK3	1.11e-14	6.90539	7.21621	7.02471	6.80139	7.57909	7.27271	6.78125	7.49659	6.52234	7.09412	8.54652	7.98659	6.79406	6.46687	8.94246	8.46034	7.02331	7.59982	8.34135	7.3583	7.44137	7.16996	7.58337	7.09384	7.92593	6.99598	7.95884	6.92625	6.61333	6.15498	7.32913	6.37449	7.67166	7.34838	8.07203	7.42955	6.66142	6.34972	7.19494	7.18157	7.6249	7.19164	6.5048	6.6922	7.8202	6.70191	6.78557	7.15633
CD74	1.12e-14	12.1341	12.9	12.4203	12.0459	12.5871	12.4997	11.9611	12.4639	11.541	12.2207	11.566	12.5683	12.4937	12.9	10.8716	10.2232	12.0408	12.4691	12.2494	12.3064	11.154	11.8449	11.875	12.406	11.4458	12.0882	12.4471	11.6337	12.0267	10.6681	11.8025	10.9258	10.1598	12.0724	10.5434	12.6609	11.7018	11.9548	11.8435	12.4109	12.2626	12.748	11.9252	12.2229	12.4084	13.1139	12.1749	13.1083
RHOBTB2	1.13e-14	8.20083	7.03503	8.45131	7.17788	7.90445	7.14712	7.06889	7.89439	7.57382	7.3604	8.03315	8.54652	6.81329	8.51983	8.5552	9.01469	7.58108	6.91359	6.6781	6.86991	7.17027	7.81358	7.1939	7.61024	8.03271	7.08352	8.36199	7.21974	7.85721	7.11465	7.59108	6.88679	7.60462	7.82951	9.31291	7.5361	7.38693	7.24352	8.30824	6.58873	7.60066	7.31336	7.84375	8.0802	7.6323	8.22664	6.82261	8.08596
CACNA1B	1.17e-14	8.11745	6.06777	7.77053	4.97709	6.91439	7.28397	4.7148	5.91009	4.88018	7.68525	6.13839	8.7059	6.13172	6.40929	8.4208	9.56138	6.7817	6.48761	6.93483	5.33626	6.015	6.85373	6.19787	7.76103	6.42479	5.74616	8.41789	7.10475	6.94167	6.56696	5.98701	5.82673	4.9135	7.81814	9.59284	6.28114	4.26305	4.41718	5.41503	4.86559	7.20688	6.20449	4.82292	6.50402	6.75481	7.2996	5.19322	4.61041
CELF3	1.18e-14	8.18469	6.34305	5.96026	6.0296	6.5664	6.51229	6.59613	8.23351	5.94034	7.35271	8.84732	7.87962	5.67617	6.38182	8.38318	8.599	5.55366	5.89084	6.14596	5.40152	8.14704	7.52924	6.23343	7.86359	8.51201	6.68103	8.3517	7.04185	6.60988	6.29204	5.53506	6.22267	7.37029	6.16987	9.10078	6.55606	6.37894	5.73888	7.49488	4.67235	7.32998	7.24399	4.79591	6.92425	7.35072	7.19508	6.15581	5.67325
MRC2	1.2e-14	9.62516	10.4929	9.18131	10.1064	9.0272	9.1063	10.1112	10.082	10.2898	10.2658	9.16275	9.46107	10.635	10.1344	7.97515	7.00677	10.9175	10.1136	11.1402	10.7636	9.25701	9.30386	10.7088	9.47466	9.07117	10.1818	9.89071	8.61315	10.3139	10.6806	9.97275	10.3897	10.3198	10.1452	8.70385	10.2744	10.514	12.6165	11.5046	10.4094	10.276	9.78447	10.2074	10.7858	9.46791	9.53247	11.0052	10.0208
PHACTR1	1.21e-14	9.89654	8.05544	9.52176	7.39809	8.79824	8.86919	7.8432	8.85431	7.52448	9.36697	8.57293	9.65459	8.31872	8.59772	9.82583	10.4699	9.46012	8.70734	8.3213	8.26676	8.68346	8.8412	7.77015	8.58298	8.75543	7.62155	9.93804	8.5713	8.85543	7.9503	7.63462	8.17544	8.23377	8.91857	10.3888	8.07006	9.02108	7.71248	8.90431	7.31097	9.17336	7.81436	7.60066	7.67691	8.4067	8.79255	7.83997	7.71747
CAMK2A	1.23e-14	9.3354	4.44946	9.40054	5.45749	7.89973	8.43361	6.22621	5.97057	6.55513	9.04762	7.88422	10.0036	6.49257	6.80473	9.58374	11.1066	7.76189	3.81	7.1499	4.9816	6.46847	7.62208	5.71965	8.30411	6.46043	6.33585	9.1963	8.15671	7.1106	5.95779	6.80861	6.65088	6.24425	8.92141	10.1415	7.38679	4.35192	7.07144	5.08822	6.96615	6.65873	6.19633	7.4264	6.46357	5.07293	7.74157	6.20947	6.2754
INPP5J	1.23e-14	5.04291	5.4953	5.95468	5.24689	6.18462	4.98882	6.14426	5.13587	4.85006	6.05169	5.63039	5.97904	5.09119	5.26747	5.94623	6.20283	5.77864	5.19096	5.12603	5.94881	4.43491	7.37718	5.44474	4.95229	5.37864	5.85666	5.66336	5.01535	5.89101	5.15769	6.80932	4.75461	5.67814	5.18198	6.09265	5.4503	4.81146	5.05838	5.02737	5.145	4.87676	5.4335	5.0975	5.01777	5.26774	4.94741	4.81454	5.45831
RAB26	1.23e-14	8.86956	7.61887	7.60824	7.83701	8.01415	8.18606	8.23007	7.94608	8.31266	8.48624	8.07501	9.40343	7.37745	8.09277	9.11647	10.1337	8.90405	7.22437	9.25724	8.78362	9.00667	8.45104	7.70098	8.28751	7.67388	8.27331	9.39249	8.73851	8.85597	7.31647	7.71882	8.47635	7.37169	7.91447	10.1072	7.18459	7.653	6.81598	7.25975	7.91861	8.66752	7.83149	7.90839	8.13065	8.26624	8.36065	6.74545	8.42466
TBC1D30	1.23e-14	7.60066	7.37745	8.35079	7.11073	7.73409	7.63183	6.94387	7.53772	6.82848	7.93985	8.18055	8.04676	7.36274	7.36707	8.15986	8.96352	7.81219	7.35995	7.36748	7.20579	7.60364	7.34782	7.86161	8.41776	7.95005	7.21295	8.68865	7.5112	7.27779	6.73968	7.43178	7.62141	8.69488	7.59332	9.02461	7.52285	7.5607	7.55846	7.77283	7.22146	7.83446	8.3981	7.54251	7.9216	7.64242	8.21545	7.0579	7.10139
ADAMTS8	1.24e-14	6.81206	5.15196	7.44983	6.34082	7.47076	7.15565	6.40367	5.60057	5.42398	6.83816	7.25803	7.14441	5.15138	6.82361	8.39907	8.01464	6.43247	6.81628	5.69496	5.25705	6.407	10.1197	5.81775	8.79689	6.99385	6.47968	7.16685	5.81445	6.04033	6.26806	6.37844	7.71747	5.93289	6.857	8.44204	6.75437	5.21873	5.30575	6.2448	5.91997	7.30909	8.07006	4.99536	5.99434	6.62279	7.39413	5.68693	5.06449
KLHDC8A	1.24e-14	10.4161	9.86642	9.3778	13.2579	9.97615	11.2745	13.1897	9.97246	12.6755	11.9641	10.9224	10.4443	10.7268	12.0133	8.26861	8.49354	10.6641	10.6016	11.2374	11.4316	11.4072	11.0635	11.2237	10.0342	10.7018	11.5333	9.29167	10.2186	10.8699	12.945	12.0863	10.145	9.77548	11.7429	7.88267	12.4965	12.9589	6.64702	11.8675	11.0802	10.1841	10.2921	10.9412	11.0641	11.0436	10.85	11.2008	10.6493
PPM1L	1.25e-14	8.0541	7.45857	8.06478	8.30849	8.06626	8.09437	8.26741	7.98109	7.36874	8.2922	8.37095	8.82443	7.46497	8.1691	8.98922	9.40586	8.01233	7.40344	7.44048	7.78306	7.67426	8.33825	6.76984	7.99469	8.59416	7.94443	8.6687	8.36076	7.92593	7.60261	8.05896	7.73766	7.41499	7.78018	9.06757	7.7441	7.31227	7.00588	7.39752	7.50846	7.56651	8.60427	8.00175	7.56942	7.98934	8.30748	7.74991	7.13775
PRSS3P2	1.27e-14	7.77137	7.53329	7.25134	7.3418	7.70566	7.65803	5.46277	6.95048	6.23324	7.4425	7.24324	7.66716	5.9482	6.87932	7.65744	8.39598	7.40842	6.89843	5.01266	7.67057	6.67218	6.78069	6.13801	7.37758	7.47772	5.96408	7.65256	7.44007	7.90299	6.50086	7.36666	6.62146	6.86698	7.59811	8.5764	6.38027	4.59746	7.1499	6.65132	5.63257	7.28397	6.48508	7.61701	7.47604	7.2431	6.96053	6.7811	7.78145
CPEB1	1.3e-14	8.50251	8.02176	9.50964	7.36391	10.1688	7.51537	7.10054	7.00256	7.31323	8.999	8.16674	8.83101	7.46877	8.7801	9.28359	10.0819	8.6238	7.72494	8.62772	7.09201	8.61472	7.63083	8.27134	7.97785	7.96312	7.48016	9.12439	8.19965	8.43466	7.34752	6.95199	7.88158	7.96473	7.90855	9.47754	7.66296	7.27025	7.55191	7.77378	7.59055	8.34101	7.96614	8.08894	9.28877	7.99501	8.74691	7.54309	9.11404
PRMT8	1.3e-14	7.85576	6.65749	8.27419	7.02719	7.32435	7.80602	6.93723	6.48602	6.84136	7.74508	7.53329	8.83338	6.53715	6.95808	8.45362	9.72004	7.03563	6.74806	7.56664	6.50526	7.10524	7.77789	6.93969	7.71354	7.41737	6.98173	8.44036	7.3546	7.58508	6.87309	7.26516	5.68788	6.88994	8.15878	9.47667	7.58195	7.28466	11.2626	6.85178	6.95837	7.29279	7.1435	6.74692	7.19652	6.85778	7.31	6.21202	6.79563
AIFM3	1.31e-14	8.99674	7.299	8.03485	7.17715	7.51888	8.02759	6.7833	7.4457	6.65071	8.30849	7.05566	8.0323	7.58508	8.20757	9.05752	9.67202	7.63015	6.74558	7.1555	7.34814	6.74875	9.59636	6.30068	6.80875	7.65116	7.499	9.01716	7.96102	7.35256	8.14478	7.90702	6.6005	5.3825	8.03818	9.54732	7.56384	7.37169	7.45623	6.69061	7.37042	8.4175	5.75805	8.03154	8.23208	6.92276	8.40334	7.33326	6.54308
IQSEC3	1.31e-14	6.43624	4.61021	6.51878	5.29174	5.91734	6.25092	6.12145	4.83404	4.75519	6.06955	6.32603	6.57937	4.57849	4.51725	7.54199	7.82355	5.09119	6.00837	5.12461	5.21213	5.39512	5.33521	4.60416	5.92452	4.89465	5.29569	7.02676	5.87971	5.47835	4.45741	5.2418	4.49909	4.88925	6.54674	7.96116	5.03114	4.58203	5.68982	5.38092	4.65837	5.95379	5.11196	5.38962	4.82776	4.70879	6.26117	4.87741	5.98088
AJUBA	1.32e-14	8.04606	8.10866	7.50155	8.16869	7.83922	8.06396	8.24686	7.12104	8.53784	8.15734	6.56158	7.77309	8.68798	7.28983	6.65105	5.75906	7.33624	7.99161	8.6342	7.56135	6.9444	7.31837	8.43466	7.22704	7.38749	7.9148	7.17043	7.75996	7.96551	7.58251	8.31188	7.24802	6.76843	7.33081	6.45044	7.78045	7.57657	8.31963	7.77028	9.05002	7.89406	8.29816	8.80273	6.85643	8.13537	7.87591	8.96434	8.80127
DRAM1	1.32e-14	9.11369	9.71024	8.96509	8.35837	8.52988	10.1586	8.6238	8.09063	9.08818	9.13996	9.20658	8.18079	9.63919	8.85611	9.15818	7.82754	9.66584	9.86883	9.26822	9.34628	8.26754	9.06276	9.52609	8.41614	8.25365	9.79672	9.15121	8.40045	8.26395	10.0198	9.52807	9.37465	9.45903	9.63873	8.02516	9.77643	9.20215	9.91577	9.3339	9.94463	8.71039	8.85409	9.80792	9.88758	8.41361	9.27627	10.1186	9.55009
FAM174A	1.35e-14	10.1942	10.6803	10.6441	9.68976	10.904	10.2025	9.93192	9.99651	9.941	10.7262	9.14551	10.3474	10.4443	10.305	10.9034	11.2497	10.9653	10.181	11.2	9.60647	10.1128	10.7896	10.7761	10.1134	9.66848	10.337	10.8661	10.424	10.4407	10.1694	9.87729	10.6903	11.0474	9.80666	11.2317	10.2368	10.3074	10.2737	8.89609	9.36408	10.7399	10.0159	10.0435	10.8378	10.2934	10.071	10.5788	10.5461
LOC103344931	1.38e-14	9.274	7.33939	9.16627	7.66623	8.63934	8.40955	7.86005	7.99766	7.79749	8.53563	8.72003	8.90366	6.88782	8.39569	9.28332	9.77122	7.50448	8.05777	7.40299	8.22664	7.69135	8.06552	7.23061	7.99591	8.63458	6.99414	8.89399	7.77938	7.88519	7.94783	8.63228	7.95306	8.81978	8.77126	9.47836	8.21713	8.46939	8.97465	8.21162	7.88627	8.06115	8.24356	8.10879	7.64446	8.73473	7.89113	8.167	7.53163
SMC5	1.42e-14	9.26366	9.18569	8.4762	8.76774	9.10455	8.91976	8.79408	8.72082	8.86147	8.45537	8.54029	9.64326	8.08775	8.52868	7.97061	7.85948	9.1774	9.01603	8.78881	8.15671	8.31417	8.47591	7.99469	8.64898	8.73	9.38444	8.20402	9.30841	8.81363	10.2978	8.59941	9.42643	8.47563	9.21671	7.3222	8.84959	9.44567	8.68752	9.17617	8.72434	9.02016	8.99633	8.39131	8.82967	8.34951	8.28005	8.99498	7.84173
SOX2	1.44e-14	11.6573	11.8509	10.7639	12.6198	11.2269	11.8316	12.3982	12.0148	12.1341	11.4554	12.0007	12.0547	11.5719	10.9765	11.0852	10.2052	11.2789	11.2308	11.9694	11.9427	11.7066	11.8025	11.5497	11.786	12.2776	11.7241	10.8644	11.9711	11.3865	12.1686	12.3086	12.4639	11.9499	12.2049	10.4717	11.5454	11.9779	6.82658	12.4717	12.0408	11.7619	12.2557	12.0036	11.5486	12.2268	11.8093	11.4914	12.0076
SLC26A4	1.46e-14	7.31074	4.6807	6.30403	7.37866	7.21863	7.79399	7.99877	5.15976	7.44528	6.80783	5.25196	7.23508	7.47676	6.28371	6.98731	8.52975	7.14301	7.11073	5.74326	5.89638	6.5186	6.27776	7.12841	6.80378	6.35638	6.72843	7.35723	7.1635	6.47074	6.00799	6.44057	6.22422	6.27049	6.34837	8.05482	6.77519	7.09327	6.82234	6.60867	6.81163	6.43624	6.81822	6.25851	6.8039	6.49939	6.58331	7.25461	6.63056
EPB41L4B	1.5e-14	7.04253	6.17907	7.18501	6.73795	6.91055	7.256	6.48761	7.07934	6.65937	6.61434	7.2102	7.66131	6.60646	6.71578	7.35225	8.22357	7.66746	7.00229	7.16956	6.86507	7.58719	6.77013	6.72002	7.48173	7.65435	6.57361	7.69441	6.84685	6.67523	6.98288	7.28703	7.84956	7.44035	7.33176	8.3072	7.65221	7.2431	7.68058	8.29123	7.3972	6.44648	7.49829	6.59705	6.84043	7.00414	6.8074	7.19948	7.5155
ZNF516	1.5e-14	8.12732	9.49088	7.72972	8.78727	7.92351	7.90809	9.23741	8.99093	9.01038	9.23155	8.59643	8.21806	8.86847	7.72893	8.46186	7.96523	9.21871	8.80445	8.10866	8.22762	9.71371	8.58101	9.38003	8.78629	9.29866	8.83933	7.73792	9.14961	8.72669	7.05289	8.72324	9.45852	8.9471	8.39499	7.86172	9.20694	8.05495	9.20572	9.4362	8.70479	8.17675	9.19658	8.60815	8.83364	9.10469	8.70519	8.98332	9.15588
TNFRSF19	1.53e-14	8.0481	9.44077	8.06262	10.635	8.44778	9.49917	10.6899	7.86549	10.9998	8.93389	8.58989	8.12226	9.38758	9.39383	7.43647	6.52951	8.68865	8.28893	8.27317	9.0543	8.8741	9.6928	9.67711	8.66213	8.41666	10.1927	8.09169	8.06156	9.75792	8.39004	10.9015	8.39187	9.31439	9.24499	7.18364	9.99962	9.02215	8.10515	8.9753	9.54476	7.88038	9.51769	9.96597	8.82211	8.13186	8.01779	9.73526	8.16954
LOC389831	1.53e-14	7.02489	8.40228	7.65154	7.34139	7.76279	8.17292	7.57165	7.32636	8.65877	7.69	8.17758	5.72959	8.81427	6.29463	6.85601	7.96628	7.10893	9.21755	8.86067	8.13093	9.36152	6.67974	8.44884	9.18057	8.10402	8.03113	6.44292	8.31858	7.96928	8.78246	7.49952	7.80364	9.28688	7.72941	7.69233	6.67941	6.95296	6.47277	8.74483	7.7597	8.24131	8.40118	7.83123	8.15001	7.4446	7.1555	7.51392	8.20044
CKAP2L	1.55e-14	7.98217	8.55457	7.72014	9.21056	7.08325	8.54855	9.16114	9.34818	8.14876	7.9667	7.00845	9.17589	8.78047	6.8647	5.9844	4.63914	7.70625	8.66092	7.86669	8.98974	8.51125	8.82211	7.08454	8.72205	8.71847	9.1495	7.38265	8.6687	8.97942	9.07724	8.96252	9.27341	9.33281	9.11999	4.38075	8.4265	8.58989	6.89192	8.84572	8.82161	8.46345	7.64136	9.04736	7.62851	9.03278	7.96586	8.07768	7.27205
SULT4A1	1.55e-14	10.203	7.29086	10.1105	7.1883	8.88489	10.0659	5.83903	7.15491	6.80125	10.1114	7.62179	11.2075	7.32857	8.15659	10.7981	11.9313	8.98888	6.36037	9.07997	7.39288	8.82789	9.2091	6.90298	10.0102	7.45292	7.65411	11.6829	9.51785	9.34726	9.763	4.99653	5.82392	7.46952	10.1265	11.6286	8.19488	6.94531	6.19025	6.51703	5.55366	10.0537	6.05748	7.83602	9.24285	6.28724	9.93584	6.72017	5.56971
KIF3C	1.56e-14	10.7142	9.62529	10.5255	9.6208	10.1552	10.2591	9.33406	9.87312	9.79181	9.9029	10.8632	11.2228	9.7643	9.84418	10.8608	11.7294	9.86527	9.47928	10.1366	9.68858	10.0634	10.7355	9.91779	10.5549	10.2023	10.3509	11.1463	10.1452	10.2296	9.65677	9.59194	9.36944	10.3372	10.6565	11.6149	9.66833	9.34013	8.96186	9.70315	10.0988	10.1532	10.4986	9.65356	10.3839	9.61611	9.87994	9.51769	10.0613
HEY1	1.56e-14	11.4783	11.6981	11.635	13.7961	11.4458	12.6198	13.674	12.4798	13.3673	12.9361	13.2117	11.9484	10.691	12.2131	13.2522	11.1357	11.7375	12.9543	11.9188	11.3514	12.4255	12.9098	12.4084	12.896	13.6169	12.896	11.7604	12.5564	12.3957	11.8765	12.8034	13.1897	12.217	12.6887	11.2527	13.4372	12.3202	11.2595	13.6082	12.9275	12.5227	13.522	12.6609	12.1814	13.023	12.406	12.2427	12.834
SSBP3	1.56e-14	9.98782	9.19323	10.0872	9.44567	9.86035	9.13085	8.98659	9.68285	9.11179	9.65459	9.28386	10.8828	8.81206	9.62178	10.1938	11.0135	9.5677	8.83101	9.38788	8.95488	9.57622	9.4873	8.34369	9.61638	9.66456	8.75688	10.5513	9.39354	9.25269	9.21781	10.1566	9.27709	9.20936	10.1178	11.0752	9.51242	9.43382	9.36152	9.24939	8.74444	9.73944	9.74292	8.15168	9.17714	9.95249	9.37491	8.67282	10.1935
PPP4C	1.58e-14	9.85004	10.5071	9.75765	10.5066	9.67934	10.1995	10.8331	10.645	10.6257	10.2368	9.55326	10.0988	10.6081	9.76909	8.90281	4.84636	10.137	10.5877	9.04897	10.8378	10.2399	9.61801	10.4358	10.0394	9.06361	10.4929	9.05015	11.1501	10.3751	11.3532	10.1749	10.7926	10.2937	10.6757	7.43825	10.641	10.5429	9.55251	9.86883	10.013	10.2126	10.2457	10.691	10.7893	10.8378	10.1936	10.8105	10.274
TRIM5	1.63e-14	7.65803	8.85813	7.21188	8.11314	7.79849	7.63215	7.9709	8.04874	7.86949	7.83618	7.13056	7.27344	8.35564	8.05544	6.53964	5.62028	7.78475	8.62535	7.57165	8.115	6.94949	7.25947	8.14407	7.09828	7.08454	8.28893	7.48437	6.81933	7.72341	8.16402	7.56407	7.47207	7.85746	7.60028	5.87218	8.00389	9.0541	9.316	6.88248	8.08981	7.84899	7.37092	8.17218	7.75883	7.17932	8.5196	8.38624	7.14176
PRKACB	1.66e-14	12.1207	11.2619	12.4156	11.3865	12.2358	11.8167	11.2301	11.497	10.9444	11.9456	12.0703	12.5079	11.0852	11.9564	12.2941	13.0379	11.7888	10.8176	11.5696	10.4646	11.6057	11.7575	10.8588	12.111	11.9531	11.0489	12.5387	11.5817	12.0636	10.741	10.9283	10.8343	11.9377	11.6508	12.9361	11.4946	10.8555	9.54977	10.9022	11.0019	11.5302	12.1207	11.0546	11.2722	11.1161	11.7546	11.057	11.3962
CACNB1	1.69e-14	7.41381	7.67538	8.19341	7.76204	8.28727	8.3981	7.55489	6.98753	7.76671	7.36826	7.13036	8.42094	7.31288	7.94581	7.75563	9.18648	7.62118	7.33109	7.96185	7.70322	7.67006	7.67677	7.80306	7.31474	7.29112	8.08249	7.4398	7.70452	6.99866	8.39499	8.29299	7.80145	8.06797	7.92996	8.80431	7.52896	7.45423	7.97143	7.97322	7.44733	8.42345	7.44501	7.44825	7.54221	7.62865	8.07123	7.67742	7.51392
PPFIA3	1.7e-14	8.37284	7.62358	8.55133	8.23738	8.14208	8.41449	8.63077	8.10879	8.49109	8.38844	8.49243	9.05028	7.51957	8.55934	8.86529	9.96841	7.53288	7.51707	8.19774	8.87345	9.2617	8.76824	8.34702	8.84229	7.99226	8.02905	8.79578	8.25938	8.41737	8.72413	8.58779	8.50241	7.72471	8.51458	9.8092	8.3195	7.68642	8.03594	8.22133	7.86896	8.74251	7.90143	8.32761	8.54495	8.19749	8.41213	8.35361	7.96714
C1orf204	1.71e-14	8.14641	7.86614	8.08084	8.23482	8.26127	7.84707	7.95005	6.98079	6.67839	7.88995	7.20553	8.36379	7.76279	7.92243	8.62466	9.08155	8.69241	8.3293	8.09999	7.66825	7.90715	8.00244	7.82912	8.07264	7.86949	8.29037	7.8401	7.67995	7.47772	9.09485	8.46766	8.0525	7.88169	7.72248	8.70722	7.89886	7.58209	8.12789	6.55427	7.57355	7.87827	6.9229	8.1189	7.7836	6.39364	8.39536	7.6288	9.19135
CNNM1	1.74e-14	7.71099	7.42475	7.98985	6.78759	7.51524	7.69429	7.02626	6.90741	7.57735	7.68113	7.32504	9.41185	7.12324	7.30243	8.15443	9.29959	7.78236	7.1709	6.44668	7.38775	7.39503	7.5876	5.80027	7.90609	7.05774	7.6069	9.1375	7.79722	7.67314	7.54975	6.96483	7.77508	7.85937	8.26103	9.58119	6.63569	6.8283	6.61194	7.2023	7.04008	7.52326	6.922	5.00608	7.87412	6.72607	7.62919	7.60988	7.18644
GNA12	1.77e-14	11.2091	11.297	10.5278	10.3554	10.751	11.947	10.4708	11.3837	11.3258	10.9674	11.6195	11.2	12.0112	11.7361	10.5944	10.2995	10.7671	11.0875	11.8093	11.0845	11.7631	12.0076	11.314	11.4544	11.77	11.1016	10.506	10.618	11.7348	11.5187	11.6772	10.4966	11.0921	11.1432	10.4071	11.7831	10.635	10.2917	10.4775	11.4593	11.171	10.2599	11.3767	11.1911	10.2829	11.1357	11.4685	10.2457
DDX60L	1.77e-14	7.69082	9.15588	8.20556	8.15822	8.91231	8.21308	8.19989	8.59993	7.73261	8.3905	7.72072	7.78827	8.63469	8.49541	7.54428	6.80023	8.66453	8.39446	8.69981	7.76503	8.79604	7.65942	8.32313	8.05517	8.29025	8.53873	7.69402	8.13198	8.06396	7.57684	7.85875	8.55216	9.70251	7.86276	6.123	8.50345	9.00051	8.6995	8.47785	8.8362	8.15152	8.55039	8.14492	7.93547	7.60309	8.89243	8.33551	8.13079
KCNH3	1.8e-14	8.81017	7.32173	8.99131	7.91264	8.18985	7.56096	7.7632	7.42303	6.11317	7.54921	6.91533	9.56669	6.23994	5.85314	9.0625	10.0467	8.21148	7.28775	6.25911	8.38991	4.85062	7.48927	8.33972	8.24315	7.2102	6.10464	8.93818	7.68563	7.20286	6.71971	6.93311	7.49625	7.66086	8.74575	10.5791	7.31435	7.3386	6.9017	7.72763	5.10783	7.61479	7.12353	5.64773	7.59043	5.17129	8.2829	5.08268	7.62605
2020-03-04	1.82e-14	5.94142	4.53245	6.6183	4.76817	4.52613	5.67227	4.77319	4.91061	5.49133	6.85063	8.79604	7.66257	4.4969	5.44372	9.23511	7.42875	5.39951	6.61141	7.05883	6.7375	7.19892	7.5361	4.98364	7.77404	7.48659	5.30468	7.79437	6.40982	6.83838	4.86286	5.99686	4.53538	6.8217	6.9637	8.99198	8.80753	4.72878	4.86674	5.23739	6.84697	5.59726	5.10203	4.31827	4.92957	5.25705	4.76235	5.30551	4.48389
FBXO5	1.82e-14	8.96807	9.03088	7.03854	9.86946	6.34837	9.2445	10.2425	10.3106	8.07344	7.7269	7.94977	9.57495	8.96965	6.99075	7.82183	6.35078	8.25051	9.35181	8.34458	9.68345	8.87697	9.17644	9.06209	9.02983	9.29293	8.54219	7.76726	9.7489	8.87281	8.21028	8.91609	9.94872	9.53558	8.27925	6.0826	8.39625	9.57038	8.17924	9.46675	8.59039	8.97562	8.68798	8.81682	7.43518	9.72293	7.4596	9.33253	8.1452
CCNA2	1.85e-14	8.64558	9.04075	7.98029	9.99098	7.7085	9.26392	9.83205	10.2284	8.62875	8.29396	7.86372	9.57413	9.03593	7.29329	7.45583	7.37877	8.43692	9.06598	8.10606	9.41423	9.20391	9.31845	8.31885	9.10716	9.1016	9.54545	8.23554	9.77136	9.33195	8.46373	9.59801	10.0944	9.21534	9.21922	7.09785	8.42678	9.50278	7.8237	9.40902	9.07384	8.44739	8.07006	9.63873	7.84912	8.93486	8.31498	8.78881	7.73364
CRISPLD1	1.85e-14	11.414	10.4615	10.2415	11.2291	11.0875	11.8477	10.8343	12.1912	12.654	11.6089	11.138	9.91293	11.8291	11.6017	9.72513	8.13358	10.8126	10.5515	11.5175	7.97985	11.2951	10.5479	10.6211	11.6548	11.623	11.6857	10.8909	11.5578	12.5359	8.87227	10.3888	11.9079	10.0581	11.3837	8.85556	11.4373	11.3325	9.50619	11.2443	12.0282	11.071	11.903	11.4654	11.4041	11.5302	11.8274	11.4191	9.31208
FKBP5	1.86e-14	10.0523	12.354	12.0459	9.27186	12.0022	11.616	9.53293	10.1738	11.0458	10.8941	8.99974	9.11839	10.0809	12.5839	10.6646	10.7654	10.7034	11.9393	11.0204	11.2083	11.7589	12.299	10.8463	11.8509	11.5591	12.141	12.1933	11.7589	10.8474	10.5329	9.20292	11.9852	11.5376	8.72896	10.0109	11.5344	9.27765	13.1039	9.75247	10.8087	10.8047	10.8954	8.99912	11.8809	8.20687	10.4887	9.62569	12.6953
KCNJ4	1.87e-14	8.61983	6.80829	8.30824	7.49139	7.22812	8.29425	7.67018	4.25381	8.14876	8.1238	6.20109	9.91952	5.89573	5.81158	9.38868	10.7504	7.50678	4.44872	8.02629	6.80769	5.27838	7.67377	5.36865	8.27331	3.824	6.62175	9.31892	8.0304	8.39797	5.90215	3.20584	4.79164	3.77817	8.56306	10.7641	3.95142	6.67074	7.95717	5.82545	6.25834	7.79029	5.56431	6.56555	7.4501	7.30031	7.63215	6.46076	5.00073
FBXL15	1.88e-14	7.88408	8.07264	7.89987	4.57211	7.86696	6.45875	7.75238	6.90483	6.09334	8.01298	8.11838	8.78481	7.62405	7.92552	9.02461	9.59801	7.5468	7.32659	7.48265	6.63886	7.09923	8.11014	7.25514	6.89843	7.1635	6.81119	8.79052	7.36448	6.99866	4.48201	5.90148	6.54824	8.22406	7.80821	9.85327	8.25129	7.53187	8.52284	6.81676	6.50386	7.24937	7.97515	7.19769	8.08993	8.53428	8.23534	6.36928	7.43949
LY6H	1.89e-14	10.0146	7.41141	7.45491	6.55011	8.26741	9.13738	7.05597	7.48331	6.92482	9.58309	8.2205	10.532	7.33124	8.31963	10.364	11.5532	9.03403	8.22395	8.29789	8.53013	8.02314	8.3763	7.22064	9.59815	9.3136	7.04948	10.8041	8.6095	8.50696	7.87398	6.7262	8.59388	6.50016	8.18685	11.256	7.68406	9.18372	7.02072	8.92934	7.29627	9.3851	7.18487	6.97291	7.78545	8.12114	9.10569	7.99917	7.17666
HECW1	1.89e-14	8.03818	7.64536	8.61545	7.86265	7.75944	7.96702	7.72728	7.80379	7.78183	7.73057	8.54652	9.01655	7.65636	7.70797	8.42277	9.77629	7.30802	7.37312	7.41412	7.80703	8.19008	7.81857	7.94116	8.40305	8.40148	7.5069	8.96665	8.18162	7.80683	7.84551	8.27486	7.70861	8.07983	8.42547	9.41254	7.58984	7.63833	7.45931	7.80835	7.41624	7.47714	7.68788	7.7232	8.28345	7.70098	8.09526	7.80579	7.75623
KNDC1	1.9e-14	7.51242	7.54772	7.74928	6.94671	7.82653	7.92122	7.11387	7.13517	6.81272	7.83258	7.46298	8.33395	7.81447	7.50969	8.21558	8.91339	7.68682	7.7859	8.001	7.37576	7.34929	7.78032	6.93164	7.78373	7.31886	7.01161	8.36581	8.11397	7.7859	8.8362	7.24563	7.27359	7.28569	7.71527	8.89994	7.85721	6.95733	6.83871	6.25851	7.23953	8.3	7.1286	7.92054	7.88393	6.81035	8.17343	7.29342	7.5812
CBFA2T3	1.95e-14	7.66669	7.10951	6.85178	7.22108	7.32845	7.43505	6.58388	6.68431	7.71192	7.13169	7.63756	8.59969	7.01983	7.33394	8.20255	8.58117	7.45569	6.9994	7.46975	6.67991	7.50089	7.47557	7.11151	7.55191	7.56219	6.9971	7.7633	7.53548	6.75255	7.45872	4.09146	6.73028	6.59051	7.20447	8.01718	6.63399	8.15822	7.68231	6.14404	6.60878	7.37731	7.8089	7.24563	7.28541	8.17461	7.30494	6.92212	7.32129
CHN1	1.98e-14	13.1622	10.9605	12.8656	11.4522	11.4282	12.8776	11.498	11.5112	11.2843	12.8736	10.6242	13.8995	11.2115	12.0978	13.4021	14.5934	12.3736	12.3321	12.2358	10.7993	10.3739	11.9677	10.6003	13.0839	11.4263	11.0831	13.9522	12.5387	12.8558	9.95184	10.738	10.2469	9.43889	13.1956	14.3847	12.1606	11.062	10.9674	10.8699	11.4382	12.7303	11.8675	10.8348	11.7766	10.9681	12.685	11.4675	11.1288
EMP3	2e-14	11.8406	11.3364	10.7915	11.5743	11.5333	11.5324	11.2737	11.1218	11.9284	11.4698	7.73104	10.4112	12.1378	11.5862	8.29802	8.22294	11.8135	12.5477	11.7348	11.4958	11.0744	11.4935	12.3909	11.3204	9.24099	12.3659	11.0149	11.7012	11.1869	12.9631	11.2172	11.8391	10.3425	11.4675	7.60506	12.4285	11.081	11.4727	12.3043	12.9949	11.7078	8.15556	11.5779	12.817	9.5073	11.5247	12.0636	11.9867
LRRC73	2.04e-14	8.31793	8.04204	8.06954	7.32411	7.25159	8.34817	7.43245	7.69281	8.29469	7.67289	8.55254	9.04059	7.26017	7.57855	8.77067	9.4056	8.76482	7.87884	8.86374	8.92483	7.8409	7.48132	7.8149	8.16539	7.4887	7.91198	8.59831	8.22078	7.47129	8.24462	7.40828	8.08044	8.11613	8.36241	9.70251	7.46049	7.60531	8.13437	8.01261	7.88733	7.51511	7.2919	7.75895	7.8607	7.47634	7.47772	7.86479	7.97799
NLK	2.05e-14	9.96359	9.58882	10.1779	10.0235	10.3879	9.4859	10.0621	9.50998	10.013	9.69892	9.58076	11.021	9.41593	9.80887	10.417	11.4772	9.47869	8.83757	9.67979	10.3383	9.37491	10.4943	9.55453	10.0008	9.52064	10.8805	10.5401	9.60368	10.2864	9.02242	9.39899	9.30356	9.3265	10.0563	11.3755	9.11287	9.54504	9.42533	9.28959	9.18908	9.59227	9.38275	10.8722	10.5284	9.34557	9.5736	9.36614	9.3357
NRSN1	2.07e-14	10.012	8.48252	8.86919	8.13346	8.01039	8.84091	7.94155	8.20255	7.40601	8.72669	10.1273	10.7129	8.1585	9.35403	10.7829	11.0883	7.84486	8.22555	8.67972	8.42664	8.56984	9.20269	7.89406	9.59372	9.48986	6.69623	10.2305	9.47386	9.14883	7.68058	8.41666	7.52648	8.22762	8.7032	11.6363	8.55683	7.58209	6.01315	8.25271	6.92588	8.75779	7.76038	7.2696	7.70294	8.41666	8.20544	9.35634	5.29474
FIGN	2.07e-14	9.59974	9.74042	8.69609	9.64441	10.2039	10.0259	9.64148	9.03373	9.85193	9.75952	8.69101	8.62595	9.64711	10.1861	9.28674	8.09935	9.36351	9.74637	9.57994	8.64048	9.99405	8.94502	9.24749	10.9155	9.58431	10.1356	9.43535	9.00369	10.2962	10.686	9.96861	9.64566	8.61061	10.7899	8.58651	10.3351	9.42643	9.07072	11.031	10.4578	10.3143	11.0317	9.23005	9.67173	9.93228	10.1555	8.89709	9.62866
RPS27L	2.09e-14	10.5983	11.6857	11.1007	10.4534	11.2815	10.9572	10.583	10.5904	11.4373	11.1646	11.0789	10.3474	10.9379	11.2501	10.9998	10.0287	11.713	11.4902	10.583	10.5278	9.8919	11.3377	11.2869	10.9998	10.0729	11.2	10.6718	10.9592	11.261	9.9289	12.2824	10.503	11.7018	11.5486	10.3318	11.4159	11.9456	11.9627	10.9892	11.5444	11.1492	11.0149	11.7532	12.2409	11.8391	11.3776	11.7902	10.9148
MS4A4A	2.13e-14	8.7139	11.0052	9.99035	8.0063	10.3567	8.74746	8.15708	8.6342	8.09331	8.80402	7.97033	6.89081	10.0789	9.00383	7.24927	6.07756	10.2143	10.2256	9.65546	7.98632	9.23434	8.12355	9.71311	9.30721	8.15211	8.7737	9.85116	8.56217	8.44415	6.9999	7.74699	8.55622	7.48659	8.25206	6.20414	9.23585	8.52895	8.22543	8.20556	9.41073	8.57725	9.17254	7.76527	9.59328	9.57592	9.90663	9.34642	8.7904
DCTN1-AS1	2.13e-14	6.03145	5.68916	7.11021	5.68116	7.05046	6.69061	4.77319	5.06819	5.79627	6.37662	5.43255	6.51314	5.83154	4.1762	6.42065	8.26727	6.54057	3.98663	5.74964	6.10824	5.62154	5.49197	5.42491	5.84987	1.58496	5.21333	6.59209	5.14662	6.30054	5.02737	6.24316	4.19073	6.41772	5.65413	7.05275	5.14473	2.17329	5.46434	4.99383	5.59518	6.1776	5.13024	5.75532	4.06055	4.14748	5.81878	6.54928	4.90097
LOC100506639	2.16e-14	7.90761	7.75692	7.91012	8.047	7.81076	7.86034	7.90761	7.22108	7.63028	7.55489	8.62192	8.20836	7.69294	7.35691	7.57095	7.36067	7.21162	8.00969	7.4009	6.99462	7.94726	7.75578	7.43178	8.11072	7.95757	7.90985	7.5951	7.76404	7.91588	8.45118	8.44636	7.83271	8.12114	7.99016	7.30243	7.42516	7.61732	7.35197	7.56205	7.32659	7.84824	7.71542	7.74759	7.54382	7.82314	6.85302	8.05468	7.3012
DOK6	2.16e-14	8.31301	5.68473	6.75646	3.94231	6.98011	6.99333	4.40306	4.61504	5.84818	7.66517	8.55957	8.59525	4.3488	5.57166	9.0541	9.70562	5.89912	4.8806	5.87919	4.1953	7.46546	6.81341	4.91716	7.70468	5.20372	5.3514	8.83265	6.34473	7.63462	5.64553	4.32564	4.77078	8.2836	6.39406	9.82777	5.21124	5.29106	5.44232	8.44009	4.98337	7.07203	8.51176	5.54845	4.20824	8.23534	7.56504	5.63456	4.53118
C1QC	2.17e-14	13.0591	13.7372	13.6644	11.9694	13.53	12.7442	12.1896	12.9816	11.8245	13.3406	12.1218	12.0567	13.1956	13.5907	11.7589	10.0028	13.074	13.1782	12.8538	13.3046	12.7721	12.3302	12.9361	12.7442	12.3909	12.5132	13.5442	12.0795	12.7442	9.71328	12.1264	11.6385	11.5476	12.105	10.23	12.9497	13.3531	11.41	12.5935	12.6137	13.1293	13.6644	12.0651	13.4768	13.3046	13.8733	12.4554	13.3673
MCM2	2.21e-14	10.6531	10.3359	9.1161	11.0584	8.35925	10.9129	11.1714	11.5155	10.421	9.23125	8.89856	10.8941	10.2254	8.9824	9.2317	8.96622	9.94068	11.1096	9.66456	11.4563	10.188	9.71647	10.1806	10.7114	10.4389	10.5071	9.59284	11.4926	10.7443	10.6488	11.2598	12.2557	11.0458	10.8941	8.17606	9.70282	11.2228	9.08738	10.0753	9.91334	10.7537	9.93069	10.3064	9.23031	10.2723	10.0789	10.3312	11.0802
KCNAB2	2.22e-14	9.51999	7.81632	9.31573	6.18301	8.20801	8.90227	6.87885	6.49445	6.29614	8.53194	7.04841	10.3536	7.75224	7.30506	9.20022	10.9987	8.54398	7.93805	8.50864	7.6136	6.96038	7.86005	7.30613	8.72486	6.72539	6.74098	9.93015	8.90068	8.10487	8.15347	5.94797	7.17728	6.56278	9.11316	10.6231	6.37417	6.94138	6.59705	7.65732	7.47511	8.92855	7.35497	6.90206	8.57879	7.85721	8.66528	6.37049	7.49964
DLGAP3	2.23e-14	7.40516	4.81146	5.51226	4.94937	4.553	6.79205	4.49815	4.82563	5.15946	4.777	5.04741	8.50372	4.40521	5.70572	7.61045	8.44536	4.52184	3.83113	3.92396	4.39089	4.46035	5.00715	4.52021	4.61569	5.18329	4.36479	7.75511	6.70068	4.94444	5.18298	5.47835	4.83616	5.35957	5.90051	9.09662	5.00005	4.82906	4.01418	4.27992	3.695	6.7724	4.63035	3.5625	4.85979	5.28581	4.24751	4.96242	5.07885
RIMS2	2.26e-14	9.18718	6.15613	8.68752	6.66768	7.61831	7.83319	5.92841	7.19175	7.69851	8.51154	9.54265	9.5359	6.879	7.77338	9.5793	10.9653	7.40299	6.69245	7.46546	7.33916	7.83602	7.86345	6.34692	8.86565	7.16604	6.75317	9.55282	8.10402	8.07625	6.38691	7.70885	6.66909	8.06991	8.49159	10.5264	6.271	7.23953	7.11497	8.56295	7.41708	7.96228	8.05599	6.6421	7.92268	8.62062	7.85507	7.46702	6.99025
DPYSL3	2.26e-14	11.6264	11.8199	11.1058	11.2577	11.0831	10.865	11.0703	12.225	11.591	11.4615	12.7517	10.9504	11.2619	11.8494	11.5555	9.90593	11.2179	11.4737	11.914	10.4615	11.8509	11.7645	11.7816	12.2688	12.1588	11.9594	11.4902	11.7385	11.6696	11.5779	11.6696	11.8477	11.6183	11.7604	9.84253	12.5502	10.9238	10.6543	12.2069	12.2688	11.9827	12.488	11.3855	11.0422	11.7938	12.3133	10.9667	11.8291
STK38	2.28e-14	8.36723	8.29348	7.72893	8.51018	8.38503	8.49411	8.64951	8.33229	8.56954	8.52611	7.45114	8.14334	8.35309	8.09155	7.58442	7.07144	7.95935	9.16169	8.04947	7.61831	8.66343	8.2174	8.25672	8.38281	8.52308	8.75594	8.31313	8.49541	8.12029	8.50517	8.00764	8.98573	8.18317	7.62155	6.92625	8.13509	8.83989	10.4811	9.30208	8.87357	8.61903	8.41187	8.03943	7.80329	8.44166	7.79488	8.46651	9.14115
MEX3A	2.29e-14	7.83764	8.06127	7.0887	9.34587	7.5134	8.50723	8.87802	9.39759	8.7698	8.13537	9.03215	9.07982	8.49206	7.61491	8.26279	6.87569	7.39186	7.74867	8.36065	8.48477	9.37418	8.39004	8.6214	8.98317	9.67589	8.447	7.90796	9.09999	8.81706	8.75619	9.58573	8.85093	8.76235	9.21871	6.35287	8.10768	9.23462	7.50602	9.49801	7.9216	8.40103	9.43535	8.46451	7.36532	9.44781	8.11384	8.39158	7.67192
DACH2	2.29e-14	7.30283	4.54635	5.64134	6.62162	5.98336	7.33379	5.32184	7.42706	4.88018	7.99929	8.03526	8.26292	5.15816	6.69654	9.39669	9.51432	5.93828	5.43734	6.83203	4.74592	5.38018	6.71954	6.02374	7.85692	6.29982	4.80366	9.13296	8.77007	8.88385	4.75137	5.98353	5.93719	5.80537	6.49173	9.70282	5.72367	5.99021	5.97749	5.5203	5.29924	7.58377	8.05506	5.63937	4.9742	7.17702	6.77062	5.81855	4.79548
S100A10	2.32e-14	12.1853	12.5132	11.1418	10.6604	11.3523	11.6671	10.5189	11.057	10.3802	11.0474	10.0055	9.92767	12.2893	9.52624	9.79569	8.94615	13.4768	13.0277	12.3659	11.0416	11.2155	9.691	12.8538	11.9499	10.0974	12.5195	10.8337	11.7952	11.5312	13.0839	10.2531	12.2468	11.7872	12.113	9.01024	12.8911	12.299	12.9237	12.0336	12.7952	12.4798	11.9834	11.5933	12.1606	11.728	12.0198	12.2131	11.5444
RIMS1	2.39e-14	7.99148	6.17946	7.73562	5.69363	6.63689	6.8204	5.6086	7.09573	6.27791	7.75112	7.83511	8.065	6.32758	7.35387	8.48374	9.54128	7.13997	5.70218	7.3575	5.71041	7.49199	6.89081	6.82054	7.49081	7.50745	4.81931	8.36823	7.13663	7.18472	5.81034	7.47714	6.03759	7.9515	6.97291	9.66274	6.74709	8.17675	5.81261	6.26187	4.99149	6.73675	6.44039	5.72367	5.79606	5.72283	6.62443	7.04881	5.92021
KIFAP3	2.41e-14	11.4382	10.6565	10.9365	10.1927	10.5559	11.1686	10.7516	11.5269	10.5752	10.2137	11.3296	11.2391	10.8792	10.8524	11.4321	12.0182	11.2805	11.2852	11.3715	10.5113	10.5554	11.3542	11.0502	11.0052	10.8176	10.9404	11.2172	11.2728	10.7981	10.107	10.3691	10.2019	11.5124	11.1334	11.7846	11.2246	10.2118	9.69944	10.8343	11.3258	10.8821	11.4321	10.8385	10.8655	10.9092	11.1893	10.2309	11.9819
AX746627	2.41e-14	6.35688	6.6482	6.32718	4.76267	6.21688	6.05455	6.30919	5.36769	5.41801	6.84066	6.2754	7.52783	5.86679	7.41211	7.50846	8.67901	6.09554	5.52004	6.2103	6.2191	6.22945	6.16233	6.34809	6.76175	7.06261	5.98943	7.28584	5.90172	7.32246	8.01323	6.38404	5.50695	8.03881	7.52909	7.91026	6.9086	6.01985	6.41808	6.60736	6.29498	6.95182	7.02546	5.88362	4.09524	6.13592	7.22108	7.08065	7.09521
KSR2	2.47e-14	7.9536	6.99385	7.88531	6.89307	7.33951	7.32519	6.29158	6.40291	6.5818	7.78156	8.58418	8.31072	7.32636	6.85658	9.01194	9.69671	7.24366	7.28599	7.31528	7.0466	7.05535	7.33916	4.08469	7.81398	8.59656	7.04383	8.6658	7.56012	7.42629	7.13902	6.8687	7.00677	7.83228	7.67032	9.41644	6.24923	6.78964	6.77199	6.66641	7.00791	7.67262	6.74797	6.77646	7.79488	7.23654	7.32531	6.99759	8.11667
LDLRAD3	2.58e-14	10.8863	11.365	10.7465	12.6035	11.0445	10.8373	12.1071	11.0944	11.4415	11.5968	11.8135	10.7848	11.3377	11.0599	11.0466	8.94658	11.2365	10.836	10.886	11.506	11.3131	11.7507	11.2426	11.3214	9.73249	11.268	10.0778	10.5273	11.5509	11.6219	11.8106	11.2824	11.5422	10.1664	9.98517	11.1719	11.7335	9.85067	12.4611	11.1007	10.8918	11.857	12.3856	11.9441	12.0724	11.3158	11.0079	11.1007
SRGAP3	2.64e-14	8.62218	7.52504	7.9585	8.22078	8.92922	8.0131	8.31928	8.25285	9.37006	8.36309	8.84772	9.02155	7.35349	8.15659	8.87145	8.88848	8.24871	7.54022	7.45037	7.54536	8.74868	8.23993	7.03625	8.38648	9.01024	7.32143	8.7557	8.12697	8.30013	9.30412	9.03403	8.4957	8.34623	9.15368	9.15969	8.58117	8.02075	8.31085	8.0234	7.63183	8.1134	8.36644	8.10203	7.59697	7.8872	8.53249	8.02095	7.96228
NUF2	2.69e-14	8.41575	8.98756	6.18726	10.1337	4.91647	8.37816	10.1857	10.3509	7.92939	7.76977	6.1194	9.40282	8.80485	6.78254	6.38317	4.48009	7.08325	8.93704	7.44556	8.11464	8.52782	8.92483	7.84824	8.8263	9.39397	9.12848	7.12161	9.51419	9.06705	10.4187	9.06788	10.0701	9.37721	9.26579	5.29852	8.82915	8.86245	6.25851	9.691	8.29265	8.23554	7.61418	9.00073	6.21748	10.4642	7.81088	7.68893	7.38668
CDKN2C	2.72e-14	10.842	10.9732	9.88662	12.0425	10.0684	7.35723	12.0844	10.6976	11.7066	10.735	10.0789	11.9627	10.8903	10.3364	8.59744	8.94559	10.05	10.639	10.9034	12.0076	10.9372	12.0567	10.8239	9.59746	11.6102	11.1051	9.91421	11.7466	11.3364	10.8468	11.9079	11.5013	11.1815	11.3049	8.6059	11.3613	11.1226	9.61598	11.4404	11.4246	11.043	11.5621	11.5187	10.2208	11.421	11.0198	10.452	11.6057
RTN2	2.78e-14	9.43176	9.01424	9.32287	8.66253	8.58998	8.97546	8.64415	8.90175	8.26802	8.80601	8.84273	9.64148	8.55634	8.82184	9.55365	10.5131	8.80445	8.41269	8.82322	9.43762	9.47247	9.14009	8.44816	9.05114	8.2325	8.38624	9.86448	9.18789	8.80807	6.95733	8.54199	8.24235	8.08695	8.66016	10.3593	8.74119	7.77454	8.20148	8.14058	8.37538	9.17266	8.90418	8.26054	9.08709	9.19135	8.78416	9.01247	8.47371
SUGT1P3	2.78e-14	5.8106	5.3294	5.66244	5.21308	5.1096	5.87692	5.25673	4.42531	5.67056	5.85145	6.312	5.78062	5.2926	5.86446	6.90525	6.18137	4.87953	3.77304	5.49679	5.3189	5.14721	5.56405	3.96548	5.49968	4.01578	4.77239	5.86276	4.94966	5.28716	5.36835	2.08074	5.33626	5.44109	5.66098	6.56541	5.4328	4.48503	6.7266	5.13121	5.2644	5.02677	5.77737	5.84306	3.61562	5.90649	5.03618	5.87836	5.92021
GABRG1	2.78e-14	9.11894	5.47955	8.45681	6.03103	7.75126	7.69643	5.39336	6.7386	6.63257	7.60638	6.56604	8.11314	5.68812	6.89175	9.70957	9.91533	8.66323	6.76934	7.1748	6.15561	5.99212	6.87064	5.61671	7.04813	6.64882	5.79398	8.9824	6.75699	7.71236	6.35093	6.65706	6.77708	5.76303	6.72539	9.52777	7.34614	5.45973	5.96408	6.40965	6.74623	7.09887	6.05071	6.00927	5.24527	5.87327	7.11316	6.4701	5.80103
ST5	2.83e-14	10.8705	10.5678	9.55225	10.3418	10.3351	10.4012	10.3453	10.274	10.3666	10.7073	9.50063	9.31208	10.7082	10.2371	9.85969	9.21606	10.4134	10.8892	10.3129	10.4825	9.72941	10.5546	10.4017	9.59405	10.0467	10.2962	9.26419	9.54446	10.0815	11.0563	10.1017	10.097	9.3066	10.2966	9.09845	10.7872	11.5509	10.646	10.1639	10.6691	10.6046	9.98056	10.2872	10.4436	9.84888	10.4129	10.3528	11.4218
RAB6B	2.85e-14	10.3425	9.69863	10.1574	8.92515	9.96435	10.3372	8.9167	9.91094	9.50844	10.1826	10.3131	11.0019	9.93451	9.66879	10.4443	11.7321	9.97615	9.51419	10.0272	9.27954	9.47156	10.4736	9.8209	10.2035	10.6176	10.0435	10.9191	10.2578	9.76203	10.3572	9.28222	8.98609	9.88594	10.486	11.5862	9.65247	9.5686	9.90125	8.16552	9.32025	10.293	10.1097	9.94037	10.3858	9.71194	10.4638	9.86946	9.35546
MCM5	2.91e-14	8.48601	9.09196	8.3649	9.65261	8.76557	9.45298	9.7044	8.79864	8.97371	9.13004	8.36823	8.93589	9.4618	8.76382	8.31354	4.82202	8.91457	9.24785	7.7126	10.0107	8.5208	8.86768	8.80098	9.42447	8.47136	9.37308	7.65848	8.82481	9.90858	9.44442	9.49102	9.83607	8.62521	8.59594	6.37633	9.55846	9.69008	8.64361	9.70665	9.28732	9.24881	8.69002	8.74332	8.51744	9.76203	8.94996	8.72884	8.30973
GAS2L3	2.95e-14	8.94983	9.06238	8.08827	10.3866	7.57382	8.22777	10.5836	9.98023	9.06476	9.14961	5.99138	9.68134	9.08957	8.0991	6.43756	6.4283	8.99538	8.65222	8.14169	8.84258	10.097	9.38898	9.3027	9.53558	9.78133	9.40223	8.50332	8.72192	10.514	9.10521	8.79987	10.0167	9.45008	9.30179	6.16841	8.79908	9.50677	7.03049	10.2321	8.30258	8.86429	7.40528	9.4056	8.93177	9.28702	7.40616	8.98417	7.42875
FAM49A	2.98e-14	9.56653	9.58518	9.23294	10.1303	9.43144	9.55909	10.2573	9.41015	9.58573	8.89359	9.51432	10.1246	9.21971	9.65582	9.97542	10.807	10.1536	9.00436	9.7489	9.50118	9.17336	10.5329	8.97562	9.30038	8.82532	9.07695	9.97615	8.81661	8.66553	8.18576	9.77893	8.07983	9.77007	9.71088	10.646	9.21221	9.33952	8.93459	8.53733	8.90241	9.02242	9.01989	9.49681	9.98555	8.66227	9.33914	9.13763	9.24637
PDLIM5	2.98e-14	9.99405	9.87761	9.76203	9.89689	9.62016	9.75492	9.95802	9.53277	10.4389	9.79602	10.7893	8.94448	9.6232	9.74228	10.0008	8.98047	10.4495	11.0445	9.00612	9.11657	9.7643	10.3541	9.73249	9.48879	10.039	10.6774	9.55805	9.78674	9.92836	10.2836	10.3906	9.72544	9.80752	9.24473	8.95073	9.62529	8.84666	10.3624	10.0349	9.68701	9.98763	10.3185	9.79541	9.71053	8.9069	10.3206	9.95628	10.1269
RELN	3.01e-14	9.23227	6.88221	8.42222	7.38433	9.4394	8.18656	7.22626	7.68525	7.8889	9.31625	8.86269	9.41268	7.75016	7.93867	10.7268	10.6811	8.13484	7.00404	7.98368	7.68219	8.46983	7.7389	7.48912	9.19406	7.83618	7.16338	9.09802	8.42316	7.72715	8.14614	8.11532	8.62962	7.89925	9.66771	10.0854	8.01548	7.51765	7.94967	7.47634	7.8868	8.01667	7.37605	7.23075	7.84675	8.33636	8.65174	7.55177	8.31098
NCOA3	3.1e-14	8.43141	8.52988	9.39235	9.45983	9.38245	8.69101	9.48645	8.26568	9.25107	8.40863	8.57752	8.72908	8.3158	9.61012	8.61356	8.43868	8.49458	8.53483	8.07567	8.60076	8.53288	8.86661	8.57319	8.68878	8.83579	9.64677	8.93331	8.38948	8.87903	9.33228	10.4915	8.25002	9.31907	9.14129	7.71803	9.02536	9.18316	10.2106	8.19136	8.7341	8.40473	8.34354	9.18184	9.22693	8.18055	8.3331	9.35285	8.47068
RBM43	3.13e-14	7.61087	8.19475	7.73943	8.01505	7.96383	7.96851	8.07796	7.56942	7.3953	7.28028	8.09576	7.78533	7.83922	8.00912	7.42409	7.01969	7.91447	7.72093	8.27095	6.94227	7.66716	7.58872	7.55355	7.61024	7.60703	8.15781	7.49732	7.46034	7.76836	6.77548	7.87454	7.11664	7.27793	8.62729	7.48927	8.222	7.49328	8.58181	7.33231	8.14507	7.19948	7.91752	7.98052	8.38674	7.20501	7.96523	7.95164	7.91026
RGS14	3.14e-14	6.57519	6.28798	6.93035	6.12922	6.49793	7.02101	6.91239	6.64789	6.6938	6.82631	6.36461	6.96899	7.27946	5.98963	7.04383	7.8837	6.65008	6.75685	7.13504	6.55111	6.02074	6.41619	7.49529	6.34766	6.75993	6.73237	6.835	6.64512	6.64065	5.82595	6.6419	6.61783	6.41772	7.13125	7.32477	6.25343	6.49394	6.53933	6.38529	6.63655	6.29005	6.06098	6.65829	7.29752	6.11867	6.61113	6.51895	7.39984
C1QTNF4	3.18e-14	8.12732	4.92633	8.20097	6.09772	5.2688	8.3049	5.63869	5.53334	3.97792	7.58508	7.87479	10.3481	4.75966	7.73972	9.21768	10.6299	5.96601	6.32024	6.84599	8.20376	7.22037	6.12704	3.49014	7.24937	5.03047	4.19978	9.42937	8.23982	8.12886	1.94901	7.72956	4.94674	6.82631	8.22245	10.6311	5.69893	3.55306	6.17614	8.07501	5.2418	7.79319	5.36159	5.36979	5.29569	6.7155	8.75947	5.55017	4.2301
DTL	3.23e-14	8.77581	8.70007	7.64022	10.3365	6.95252	9.28292	10.2831	10.5159	8.14262	8.065	6.89447	9.63129	8.83706	8.00807	7.92196	6.73737	7.98714	9.31439	7.47346	9.97405	8.55325	8.88519	8.56318	9.16526	9.33195	9.25039	7.78018	9.76458	10.1504	10.2228	10.3	10.4726	10.254	9.68842	5.91444	9.38003	10.6723	6.69802	9.16395	8.93673	9.2628	7.95098	9.30941	7.7634	10.0941	8.57979	8.37846	7.45163
PXDC1	3.25e-14	9.28278	9.97649	9.17394	9.63732	9.22312	8.51111	9.72261	9.57235	9.54633	9.53794	9.88631	9.50998	10.2415	9.82777	9.00205	7.81425	9.17837	10.7158	9.14321	10.2777	8.90524	10.0809	10.6431	9.49714	9.7296	9.48267	8.87176	9.71631	9.70504	9.53649	9.97866	10.0156	11.0627	8.76246	8.41724	9.65564	8.53179	9.51769	10.2225	9.4236	9.45436	9.65012	9.48413	8.91066	9.72732	9.3632	10.0378	10.0363
UNC5A	3.26e-14	8.53438	7.65871	8.3653	5.87311	7.7085	8.23377	7.18596	7.67153	7.20217	8.32456	8.46464	9.52031	5.75879	7.01722	8.90966	10.8325	7.88995	6.48489	8.44104	6.74396	7.54536	8.469	6.92639	8.86645	7.21465	6.68949	9.29305	8.16552	7.73752	7.54921	7.4398	7.01103	7.4265	8.58534	10.3004	6.66497	6.7622	5.92975	6.34246	7.256	8.68903	8.36823	6.6383	7.30627	8.00045	8.41724	6.66622	6.50543
RAD51AP1	3.26e-14	7.9407	8.75245	7.14335	9.80119	7.50846	8.87999	10.0134	10.256	8.41423	7.53902	6.99691	6.82535	8.96131	7.40978	7.19922	6.32973	7.32559	9.32257	7.76571	9.11084	8.45669	9.13615	8.54495	8.86793	10.1538	9.07072	8.06141	8.61651	9.33771	8.69927	8.21518	10.0809	9.48413	9.28072	5.99707	9.21428	9.42013	7.54494	8.67743	8.26154	9.04947	7.86987	9.40193	7.38831	10.646	8.77246	8.76511	7.36505
ZNF765	3.3e-14	8.87604	9.12537	8.47332	9.91025	8.76824	9.61611	9.95727	9.49228	9.18622	8.59429	7.68733	8.75059	9.44307	8.80711	8.30802	7.59797	8.51744	9.14238	8.67706	9.36658	9.09802	9.15588	9.25689	8.7501	9.24993	8.78828	8.42678	9.01302	9.20842	9.08235	8.94392	9.87565	8.35132	8.92678	8.01779	9.33169	9.02512	9.20694	8.63034	9.43018	9.51456	8.81574	9.6004	8.88259	8.85947	9.08547	9.49148	8.72615
AASS	3.33e-14	8.1813	9.31234	8.68144	9.36861	9.48334	9.00612	8.98484	8.0811	9.59746	9.15152	8.31704	10.2885	9.49116	9.44983	8.55158	8.74779	9.20829	8.42851	9.42601	7.6457	8.61815	9.66301	9.13161	9.08792	9.92243	8.88675	8.12708	8.79493	9.30749	10.1128	9.3944	8.69821	8.4781	9.8711	8.36997	9.38164	9.01521	8.46871	9.67077	9.36263	9.02816	9.21563	9.34793	7.82777	9.05977	8.83265	8.9138	8.02856
RFXANK	3.36e-14	9.02049	9.81868	7.82473	10.057	8.85719	10.1211	10.2968	9.47836	10.4161	9.74358	9.30841	8.25803	9.8228	9.32096	9.38328	8.40293	9.34557	9.81637	9.56616	11.0906	8.45858	9.32066	9.61731	8.97546	9.09859	9.97615	8.4781	9.40497	9.59589	9.11624	9.72151	9.42722	8.36025	9.81125	8.69267	9.5559	10.9925	8.7501	10.5084	9.94328	9.81802	9.10934	10.645	9.64352	9.32191	9.67948	10.4296	9.51305
TMEM151B	3.46e-14	8.45669	7.54145	8.69927	7.52612	7.59067	8.15431	7.17202	8.03412	7.83967	8.29136	9.16365	9.51347	7.9323	7.2314	9.43427	10.0509	7.95136	7.52231	8.2221	7.73766	7.69921	8.23007	7.93766	8.40228	8.09714	7.58519	9.24993	8.14073	8.05468	6.90078	7.8466	7.74867	7.88813	8.99213	10.3253	7.62699	7.40394	8.001	7.62108	7.64668	7.93353	7.80213	7.36418	8.03412	7.78018	7.99303	7.48791	7.54034
MOV10	3.47e-14	8.35412	9.33983	8.03217	9.29959	8.56205	8.4908	9.24499	8.09987	8.74133	7.84245	8.25854	9.23767	8.65403	8.25155	7.04466	6.83973	8.6821	8.94367	9.31994	8.95439	8.24423	8.15721	9.15667	8.62244	8.44234	8.93087	7.93766	8.84744	8.56071	9.14391	8.7714	8.833	8.65003	8.76951	7.25356	8.67151	9.02706	9.64339	9.16616	9.26184	8.80045	8.6995	8.95367	8.40763	8.37831	8.7094	8.62089	9.8793
ANXA2P2	3.5e-14	11.7888	11.8854	11.0247	10.9418	11.2619	10.1648	11.6102	11.0839	10.9316	11.5293	8.95167	9.64814	11.286	10.4245	8.85879	8.16925	11.4593	11.9934	10.7836	11.6799	10.8047	10.4825	11.9694	11.7321	10.4708	12.354	11.4563	11.01	11.0286	11.9677	11.1759	11.3767	11.2131	11.3581	7.17958	10.856	11.0132	12.8211	11.801	11.9109	11.8584	10.8438	11.3876	12.1792	10.6196	11.3827	11.497	10.5998
C21orf62	3.51e-14	10.5669	9.02625	8.50623	8.5851	9.4959	8.90978	8.12897	9.02119	9.11316	8.74223	9.90192	7.32465	10.7454	9.43457	6.82785	5.83645	10.2688	9.90155	9.48064	8.58612	7.34139	9.2467	9.89005	7.57833	7.56953	9.69745	8.14744	8.27892	8.39975	8.37451	6.73763	8.98429	7.27484	9.43833	6.18884	9.51927	9.47899	7.321	7.11106	10.3434	9.58489	6.67523	7.18093	9.66863	7.8246	9.59372	9.22102	8.78287
DBI	3.51e-14	13.3607	13.9625	13.3673	13.9837	13.1782	14.2566	13.9403	13.8387	14.2257	13.7449	14.3249	13.8655	13.9171	13.787	13.8823	12.8865	13.53	13.6169	13.0692	12.6429	13.6644	14.4478	13.5668	13.777	14.0023	14.2898	12.9237	13.444	14.472	14.0267	13.5524	13.5442	14.241	14.3249	12.9898	14.241	13.7961	11.4685	13.7064	13.9403	13.6082	13.7449	14.3847	13.8655	13.9522	13.8039	13.9934	13.064
TMEM45A	3.57e-14	10.6523	11.2317	9.55425	9.5512	9.44806	10.1695	9.10618	10.8802	10.6942	9.85865	9.44749	7.73607	11.3552	8.99818	9.22125	7.83136	11.1447	11.3325	11.6919	10.146	11.484	8.73595	12.1749	10.886	10.5964	10.4726	10.2628	11.5627	10.1407	9.6812	9.2219	11.9677	11.1193	8.20122	8.47384	9.58766	10.1299	12.2669	9.84068	10.6142	10.8711	9.90995	9.12357	9.7099	10.4094	9.79569	11.2886	10.3985
LOC100996385	3.57e-14	7.08414	6.38955	7.41412	6.27315	6.69061	7.10858	4.21887	7.06163	5.62051	6.9645	5.685	6.88277	6.93022	6.33704	7.12909	7.98659	6.62894	6.48922	6.8966	5.06751	6.59139	5.90932	4.72008	5.88766	5.60057	6.24865	7.65024	6.32149	5.99585	5.7278	6.32553	5.34409	6.37966	7.68733	7.69935	6.50847	5.50867	6.25501	6.29463	6.94	6.45875	6.60433	5.12487	6.57589	6.35552	6.68331	6.56604	6.7082
ARL6IP6	3.6e-14	10.0764	9.97731	9.18594	9.92619	9.32564	9.84624	9.8793	10.2889	9.57308	9.13284	10.1381	10.0056	10.0771	9.01247	9.68447	8.56798	9.79984	10.2011	9.68345	10.6196	9.86243	9.95019	10.4563	9.70381	10.2781	10.0066	8.91545	10.1328	10.1265	9.99505	9.54295	10.9175	9.64206	9.68874	8.68502	9.91968	9.70535	9.59719	10.2118	9.56502	9.98663	10.0861	10.6339	8.85315	10.5728	9.55515	10.2422	9.81189
PTPN12	3.6e-14	9.74441	10.4361	9.73594	9.60572	9.33086	10.1467	9.57073	9.73594	10.09	9.88907	9.57863	9.05269	10.6969	9.2467	8.81822	9.06542	9.81537	10.6963	10.0988	9.43351	10.2504	9.8711	10.724	10.3265	10.3106	10.4924	9.51682	10.8199	10.0163	9.77506	9.54378	9.55338	9.91729	9.60478	8.37095	10.1783	10.3421	10.0502	9.91626	10.9452	10.2802	9.53378	9.93968	9.83853	9.72544	9.9046	10.383	10.2789
OPTN	3.67e-14	11.0107	10.269	11.0845	8.93603	10.9745	10.429	8.80127	10.751	8.27122	10.6903	9.6896	11.3661	10.2957	10.5131	11.2426	11.6634	10.4848	10.746	10.8941	9.3956	9.44646	10.146	10.0744	10.9258	9.98056	10.057	11.7645	10.3581	10.2727	9.71088	8.65324	9.54378	10.203	10.3567	11.5376	10.5564	10.3403	12.105	9.99608	9.9029	10.7247	11.1051	9.59165	10.626	10.6669	10.6217	10.1273	9.48618
PDIA6	3.7e-14	11.9901	12.6609	11.7846	12.5751	11.3377	12.0651	12.5909	12.5359	12.6471	11.6017	12.0459	11.8066	12.7721	11.7789	11.4501	10.9812	12.3637	13.1676	12.2447	12.0495	12.2757	12.0795	12.9898	12.0527	11.748	12.654	11.6906	12.2109	12.3492	10.8795	12.8495	12.111	12.1814	12.217	10.8397	12.3605	12.1835	11.8702	11.7546	12.7517	11.8675	11.9627	12.7796	12.0354	11.9531	12.2229	12.0651	12.2334
SNAPC1	3.7e-14	8.50623	10.3399	8.48922	9.06967	8.69002	9.03088	9.59719	8.49915	9.48483	8.48807	8.96509	9.32096	9.33025	8.40585	8.20732	7.25529	8.76406	9.0673	9.29852	8.72218	8.76299	9.26612	9.58753	7.92122	9.11233	9.28493	8.06038	9.21378	7.61844	9.24022	8.97574	8.0525	9.41871	8.54479	7.48842	8.7354	9.8353	8.24569	9.18259	8.77857	9.29265	8.64664	9.07609	8.64898	8.20556	7.79653	9.72182	9.41171
SLC27A2	3.82e-14	5.11767	4.39936	5.32421	6.09075	4.31381	5.03138	5.66881	5.83369	6.78304	6.56874	4.01308	6.39406	6.02012	4.72814	5.79232	7.57581	5.56514	5.64803	5.8714	5.63972	5.44799	5.13402	5.28127	6.10403	5.38092	4.18071	6.34512	5.15769	5.57813	6.09575	5.35644	5.27857	5.72727	5.73868	7.14879	4.97498	5.22885	5.70778	3.85631	5.71693	6.01374	5.29079	6.38473	5.76648	2.84897	5.95329	5.07027	5.78432
DLG4	3.83e-14	8.77286	7.57179	8.07409	7.96259	7.38224	7.87012	7.53929	7.03954	8.02629	7.72915	8.25779	9.10772	7.27359	7.23253	8.10351	9.33195	7.60519	7.44021	7.96076	7.27054	7.65871	7.48295	7.5417	8.00299	7.19733	8.01205	8.54112	7.83084	7.87513	7.86896	8.1008	7.60506	8.26624	8.51823	9.32316	7.12193	7.38265	7.41582	7.10993	7.53969	7.86183	8.01097	7.81314	8.06653	7.25057	7.6022	7.11034	7.68173
SRPX2	3.83e-14	7.01467	8.62875	7.73104	7.9333	8.2219	7.69643	7.79041	7.03799	8.22078	7.55058	7.86302	5.80208	9.14227	7.24035	5.60725	6.15332	7.46356	8.27068	7.54989	8.11968	7.12435	7.47002	9.73863	7.52272	6.9994	8.42245	7.18022	7.98421	7.65708	7.93766	6.60242	8.17544	8.38343	6.86914	5.99934	7.54653	8.78512	6.87755	8.73811	8.94406	7.22327	7.70541	7.4754	10.2473	5.93266	6.39153	8.84901	9.68009
GABRA2	3.88e-14	9.64593	5.18544	8.80273	5.66276	8.66823	8.58445	6.52325	8.55026	6.01754	8.32298	6.39973	9.67425	6.2948	8.74223	9.31334	10.8343	8.57698	6.85314	8.33368	6.04846	6.3639	7.0183	7.61001	8.68397	6.71678	6.10635	10.3337	7.85707	9.91729	5.96408	9.5674	6.02012	5.29989	8.2625	10.3923	6.71779	7.54808	5.13614	5.45108	6.16215	7.64079	5.82545	5.68195	7.7775	6.31943	7.53485	8.67337	6.17614
RAB11FIP2	3.97e-14	9.86097	9.36643	10.1025	10.4558	10.0778	9.52821	10.4411	9.12341	9.08337	9.96922	10.4453	10.3906	9.66969	10.3244	10.6156	10.7767	9.68612	9.21781	9.44337	8.57319	9.59623	9.45649	9.50441	9.87963	9.87341	9.17266	10.5489	9.5677	9.51855	9.89087	10.0896	9.25454	10.6636	10.1058	10.8985	9.68715	9.72004	10.5216	9.54809	9.16584	9.66274	10.1162	8.95425	9.77828	9.30991	9.85901	9.35125	9.72398
E2F7	4e-14	8.80975	8.27437	7.8391	9.50204	7.75664	8.8082	9.57308	8.73012	8.70519	8.15443	8.02658	8.95566	8.49313	7.91667	7.62959	7.44667	8.3604	8.99551	8.09063	10.0098	8.06898	8.74619	8.57058	8.73327	8.57611	9.03838	7.45623	8.81552	8.6585	9.66241	9.35487	10.1949	10.7082	9.28222	7.37981	8.30532	9.6749	7.63674	8.94448	8.29909	8.87101	8.08856	9.16086	8.52674	8.74633	8.03854	8.26054	8.19176
CDH18	4.01e-14	7.67677	6.27507	7.85707	6.59613	7.75756	7.74618	6.24821	8.10093	4.31421	8.70531	8.3981	9.07461	6.78682	7.61024	8.77928	10.772	7.74065	6.25705	7.45412	7.22825	6.97249	7.23534	6.87123	8.8771	7.5036	6.18552	9.65075	7.58161	8.26554	6.94725	3.15704	6.53988	7.28569	8.20189	10.2679	6.38027	4.5413	5.1668	5.21182	5.7555	7.97208	8.46571	4.93061	7.32636	8.05264	7.76671	5.8468	6.45997
PSMB9	4.05e-14	10.9187	11.6548	10.3834	10.6156	10.8256	11.0574	11.033	10.2384	10.0666	9.85525	10.6156	11.2196	11.486	10.2978	9.35947	7.94338	10.7237	11.1334	11.4253	12.8736	9.55576	9.93932	10.7681	10.9148	9.73161	11.2435	10.2287	10.0877	10.7195	9.75296	10.4703	10.386	9.67679	10.4699	8.54364	10.2662	10.9218	11.0204	10.503	10.803	10.2165	11.1944	10.8802	10.5479	10.6217	10.9812	10.159	10.7082
CPVL	4.06e-14	10.0374	10.6697	10.1798	10.9516	10.4703	10.3589	10.9318	9.66456	10.5002	10.1845	9.34793	8.95994	11.154	11.2237	9.14158	7.29317	10.5754	10.2881	10.5396	10.8132	9.10185	9.78967	10.6779	9.38217	9.30841	10.3198	10.1301	9.48413	10.2889	8.61572	8.76133	9.70957	7.59759	9.92817	7.36888	10.2876	10.2633	9.01024	8.5802	9.64181	9.61757	9.93968	10.0211	10.5671	10.3509	10.317	10.209	10.4802
MICAL2	4.34e-14	9.42149	8.44166	9.47188	7.08508	8.96225	9.14391	7.38184	7.6892	7.86949	9.50645	7.22704	9.87632	8.33585	8.35216	9.01909	11.1418	9.09473	9.7877	8.88573	8.95566	8.1302	8.29372	8.09767	9.24252	7.94798	8.43349	10.5715	8.81153	8.74719	8.06552	8.39214	8.06341	7.74383	9.4256	10.8879	8.52424	8.91468	10.0315	7.96116	8.97319	9.04161	7.30297	7.72941	9.16031	7.46141	9.01989	10.0941	8.68694
MCTP1	4.37e-14	8.06912	8.53288	7.84402	7.36133	7.08136	8.57587	6.84697	7.39145	8.6083	9.36905	7.77066	8.53151	9.29401	8.46545	9.00409	9.88094	9.291	7.9904	8.19861	6.77076	7.46877	9.18287	8.59069	8.63934	7.16404	7.16235	9.14072	7.48396	9.31676	7.94493	7.23883	7.61402	7.68972	7.60824	9.53392	7.30394	8.10816	8.13665	7.95962	8.11955	7.46101	7.13083	8.0902	8.65025	7.41695	9.46385	8.10155	7.51974
PPFIA2	4.39e-14	9.38328	5.42274	8.70166	5.97191	8.31793	9.03061	5.12327	8.28077	5.41254	8.52039	8.66439	9.36893	8.79798	7.95056	9.5674	10.4846	8.0194	8.82018	7.74699	5.71289	8.01578	8.40504	8.57739	9.24047	8.57228	6.59369	9.37948	7.79942	8.52829	9.68715	6.12658	7.14796	10.1444	7.88438	10.1238	7.47372	8.1549	6.8961	6.65655	7.15315	9.02326	7.9849	6.64638	7.70336	7.78318	8.77039	9.09802	9.04762
RBFOX3	4.4e-14	9.2445	6.39515	9.28166	7.01576	7.4026	8.29897	4.9561	5.71845	6.71696	8.92788	7.08805	10.8632	6.45568	6.60257	9.63368	11.3902	7.81584	7.81064	7.86908	7.05669	8.26127	7.8889	5.5898	8.76939	7.24734	6.16414	10.7284	8.10427	8.10634	6.41563	6.36712	6.42252	6.37633	10.206	11.5422	6.08603	6.80243	6.54308	6.65255	6.34896	8.53665	6.1003	6.26242	8.05207	6.1432	8.54076	6.81721	6.15613
BRSK1	4.42e-14	9.66032	8.27696	9.49472	8.50638	9.68943	8.59361	8.83364	8.84484	8.20718	9.18514	8.12185	9.6714	7.88995	8.5871	10.1349	10.3879	8.57007	7.69041	8.17774	8.9099	8.01139	8.97477	8.53373	8.95276	8.55892	8.16539	9.65777	9.06865	8.07435	9.59773	8.18245	5.01596	8.22867	9.66551	10.7099	8.04098	8.19761	5.39207	7.49221	8.02503	9.68563	9.21534	8.67394	8.88385	8.76197	8.81682	7.05856	8.88967
HSPG2	4.42e-14	7.66838	9.60396	9.49428	8.39691	9.17336	7.48584	8.89003	7.97891	9.03968	9.97745	5.7762	4.47048	9.42839	7.46197	6.07282	3.74667	8.14546	10.2108	7.59484	9.88725	7.62243	7.48038	8.09663	8.48972	8.78881	9.59623	8.74691	8.34124	8.19462	9.59859	9.10974	9.0751	7.56012	7.78278	4.40031	9.0625	8.222	11.484	8.55422	8.90954	8.29063	7.34139	9.40009	9.52777	7.27039	5.81469	10.2809	8.57169
LTBP3	4.47e-14	9.89991	10.9547	9.79635	10.8555	9.95051	9.95392	10.6576	10.1849	10.3897	9.83918	10.9653	9.29046	10.4351	9.90893	9.45956	8.7447	11.4041	11.2508	10.4139	10.1931	10.4355	9.96822	11.2951	9.87835	9.39235	9.8959	9.50572	9.83477	9.85131	9.80148	9.30779	9.64119	9.84725	9.73279	9.09222	9.92986	10.8456	10.6658	10.4708	10.6436	10.6704	10.4462	10.2615	10.3123	10.1178	9.71972	10.3691	11.0356
SOWAHA	4.5e-14	9.86747	6.11741	9.50236	6.97818	9.22717	8.29944	7.53929	8.12607	5.5019	9.33784	4.6556	11.1139	6.5623	8.35913	10.7059	11.2595	9.14637	7.35313	7.86791	7.92365	7.54627	8.45401	6.56512	9.00612	8.08337	7.21938	10.2469	7.97061	8.62348	7.46816	5.34558	7.11181	3.81	9.17589	10.8239	7.78506	7.54008	3.98078	3.64336	6.8389	8.36393	4.06579	7.99892	7.5832	7.39252	8.10268	6.36271	7.5115
MAPK8IP2	4.5e-14	9.31195	6.66033	8.64783	8.51431	8.5836	9.17727	7.8872	8.03739	7.99202	8.3461	9.25799	10.047	8.19008	8.45401	9.33885	10.531	7.35654	6.6972	8.54076	7.90013	8.0819	9.08573	7.31681	8.69079	7.86265	8.62838	9.72277	8.2039	8.18809	7.69794	8.60617	6.95314	8.03703	8.89881	10.5071	8.66146	7.38063	7.10538	7.50533	7.68629	8.80514	8.01052	7.46034	7.87412	8.00128	8.18422	7.41211	8.30824
DNAJC12	4.55e-14	8.45295	8.12509	9.13763	7.40232	9.2259	8.28868	7.71527	7.87078	7.79901	8.91749	9.77202	8.43061	8.23803	8.57698	9.71088	9.80314	8.68144	7.31361	9.03982	6.17673	8.26526	8.4535	8.17256	8.71521	8.00674	7.38679	9.09008	8.49968	8.37039	6.1608	6.8283	7.83807	8.91209	7.85334	9.84356	8.60363	7.42461	8.33984	8.50517	7.42327	8.72936	9.29018	7.99173	9.08627	8.84147	8.8039	7.9585	7.1506
TAP1	4.62e-14	9.51128	10.9959	9.52015	9.9689	9.4996	9.97514	9.94053	9.63551	9.96538	9.80613	10.3834	10.7034	10.1642	9.25857	9.28523	8.06127	9.87011	10.2329	10.3636	12.1771	9.87448	9.49563	10.2506	9.88662	9.45696	9.87978	9.57578	9.87312	9.54378	9.7633	10.3687	9.90056	9.76927	9.80856	8.46885	9.5796	10.1601	10.0342	10.3337	9.67679	9.61028	10.0857	10.412	9.83496	9.5686	9.74384	9.67664	9.32425
CACNG2	4.68e-14	7.30544	6.35788	7.48611	6.9904	7.14136	7.01283	7.04383	5.48601	6.75383	7.32085	8.98134	8.0767	6.11904	7.49529	8.42961	8.70187	4.83373	6.75453	6.97536	6.71744	6.86797	7.68947	6.46133	7.58926	7.16775	6.13743	8.23789	7.13945	6.97186	6.12939	6.83425	5.53923	6.72293	7.68075	8.94515	5.77134	6.61462	6.80637	7.04253	7.38316	7.63199	6.88575	6.63123	5.8623	7.29671	7.68364	6.58555	6.82261
ZNF217	4.69e-14	9.45969	10.7201	9.73526	10.6768	9.5878	10.0321	11.0828	8.74619	10.791	10.1598	8.49159	9.15764	10.4699	9.78133	7.9511	7.15515	10.1143	10.518	9.95203	10.2321	8.55325	10.0073	10.286	8.74719	8.53332	10.5867	9.3285	9.03927	9.28877	10.5101	10.83	8.98215	8.66372	9.67301	7.89484	10.1751	10.9224	9.35125	10.0312	10.2139	9.33138	9.85831	10.5415	10.0465	8.7009	9.74731	10.692	10.4573
ANGPT2	4.69e-14	9.0279	10.2607	8.48687	8.33855	9.37948	10.0353	8.83312	8.18032	9.8899	10.5278	7.85253	5.84966	10.4375	7.34838	7.2364	6.15498	8.69322	10.0876	7.8622	9.51407	7.70166	8.81427	8.89112	9.03881	9.78347	10.3691	7.9258	9.45681	9.6611	8.79421	9.03088	8.26421	8.62035	8.69401	6.45425	8.6723	9.1229	8.5958	9.23684	9.54573	10.2868	7.35241	10.0246	9.63873	6.92791	7.15125	10.5745	7.24171
FAM60A	4.76e-14	7.96656	9.72544	8.9138	10.1381	8.6723	9.03215	10.0923	9.39497	9.27973	9.1089	9.19083	8.39254	8.89915	8.43584	8.81525	6.75766	9.15916	9.01361	7.80145	10.0977	9.21648	8.90149	9.21726	9.33228	9.27148	9.53662	8.48844	9.30721	8.79202	8.20991	10.6499	9.62597	8.40159	9.37308	7.42573	9.10122	9.22842	8.58489	10.0445	9.03193	8.67612	9.95527	9.55995	9.38579	10.2671	9.1645	9.3542	8.74088
ELOVL4	4.77e-14	7.90823	6.40785	7.94713	7.68601	7.45816	7.99135	7.80253	8.65198	4.46455	9.09522	8.28189	8.35333	7.02761	7.94443	8.56774	9.68072	8.20003	7.97433	7.93999	8.1704	8.5764	8.24423	7.49296	8.37694	7.53994	7.82326	9.03313	7.03257	7.85048	6.80037	7.12841	8.22495	9.58584	7.84158	9.85592	7.72819	7.45844	4.39306	8.4204	4.39267	7.228	7.41595	7.96156	7.41842	7.21224	7.71192	8.03385	8.14195
CD276	4.82e-14	8.76511	9.31546	8.95291	10.1504	8.43978	8.67309	9.77643	8.91312	9.59686	8.69927	8.85373	8.36644	10.2296	8.54953	7.81556	7.43344	9.05194	10.5508	8.92855	9.68764	8.91002	8.94159	10.0258	8.2221	8.51879	10.4948	8.51823	9.11001	9.1785	8.50459	9.14565	8.41423	8.82967	9.33967	7.8889	9.03215	9.61198	9.09398	9.65612	9.01822	9.00205	9.73466	9.07936	9.52064	8.93624	9.23631	9.07764	10.3972
HPS5	4.92e-14	9.78642	9.58105	10.1392	9.06691	10.4598	9.53344	9.19108	9.68478	8.99818	9.31778	9.44337	9.24761	9.15423	9.85865	9.34981	8.72042	9.78044	10.1627	10.154	9.46412	10.6077	9.20947	9.84624	9.73652	9.1594	9.74637	9.54924	8.97824	9.47386	9.48671	9.32333	9.75313	8.95103	9.51276	8.06524	9.27873	10.0613	9.23476	9.68072	9.28307	9.75408	10.0554	9.4608	10.2831	9.70315	9.708	9.27973	9.96597
SORBS2	4.99e-14	8.22596	7.14685	7.87871	6.70014	7.49718	8.35746	6.64162	7.89925	6.80769	8.65769	7.24099	8.92946	7.91834	8.36747	8.36958	9.39871	8.62192	7.76418	7.37264	6.79096	7.93766	7.9667	8.09198	8.06942	8.52531	7.21494	9.03313	7.06104	7.54428	6.60446	9.37545	7.04715	7.4285	8.63495	9.33374	8.44249	7.08796	8.974	7.10906	8.802	7.73607	7.50373	6.76267	7.51606	6.12591	7.22408	8.43412	6.63619
LDB3	5.05e-14	7.25862	5.85289	9.04394	6.12391	8.96131	6.44408	5.89796	5.95831	6.4381	7.59931	6.67074	7.33138	6.30812	7.64348	8.78259	8.30315	6.25651	5.04802	6.05904	6.76843	6.97728	5.70475	5.87836	7.09857	7.49247	6.01074	7.23494	6.7211	7.06463	5.58576	5.91077	6.35898	6.10615	6.53787	8.66729	6.00943	5.87596	6.18511	5.95971	5.94669	6.86384	6.02643	6.26497	6.2401	7.5629	6.89241	5.93901	6.27049
SNAI3-AS1	5.08e-14	6.05769	5.63392	5.91567	6.28798	6.35172	5.54326	6.66779	5.83947	5.11248	6.03124	6.61434	6.67487	5.5245	5.20496	6.42181	7.14655	5.79284	6.32248	6.68831	6.36725	6.29982	6.00579	6.89258	6.28154	6.73207	6.65453	5.98701	6.29118	5.87271	6.56308	6.96065	5.70627	6.02296	6.16784	6.20491	5.29819	4.6807	6.6183	5.5022	6.03719	6.40185	5.77532	6.34851	5.23149	5.1552	7.21295	6.15928	6.94713
NAP1L5	5.1e-14	11.4182	8.52766	11.0737	10.0239	10.4669	11.4051	10.1093	11.0752	10.3941	11.0142	11.9095	11.7161	10.3958	10.7478	11.9901	12.6391	10.5348	10.0318	10.7648	9.58406	11.0317	11.2365	10.0301	11.3818	10.4034	10.6882	12.0601	11.2508	10.9316	9.53277	8.90954	9.50204	11.2349	10.9491	12.5656	10.3037	6.44993	9.93584	10.1621	9.85327	11.0385	10.8897	10.514	10.6425	9.91132	10.8588	10.2766	10.1384
RP4-758J24.5	5.19e-14	9.2813	9.19796	10.1497	9.28453	9.96029	8.9122	9.99277	10.1478	9.08649	9.10569	7.95677	9.44383	8.67151	9.95249	9.96254	10.8256	9.54175	9.35221	9.11233	8.36775	9.74441	10.424	9.64648	9.76219	9.19904	9.21826	10.5284	9.43325	9.38551	8.85892	8.71139	9.02079	10.5713	9.05977	10.2336	9.46554	9.54363	9.96597	9.91229	9.63551	9.68039	10.097	9.37581	9.30941	9.76173	9.65644	10.1014	9.50036
PACSIN1	5.25e-14	9.37863	4.18601	9.12262	4.79472	8.11184	8.69309	4.60839	5.73707	5.70572	8.44498	6.81221	10.5508	5.3514	5.52571	10.0256	11.3696	7.8552	3.64148	7.03025	6.24719	5.89459	8.03943	5.49851	9.15985	6.7717	6.31237	10.2928	8.14507	8.33205	2.72498	5.83154	5.53421	5.40527	8.5713	11.3345	4.87515	6.08343	5.65508	5.79232	5.25496	8.48038	5.94436	4.93061	7.03548	6.27523	8.55995	5.63804	5.85264
CALB2	5.26e-14	9.18404	7.42025	7.81763	7.69451	9.08324	8.25155	7.46141	7.32832	7.91944	8.95925	9.1774	9.25295	7.85734	6.90497	9.5382	9.72732	9.24461	8.2094	9.19672	7.4596	7.59043	7.75474	7.75692	8.9152	8.17532	8.11745	9.65899	8.0981	7.86288	8.06329	7.62155	7.65221	7.6949	8.56656	9.52265	10.3367	9.54949	7.45151	7.92524	8.17774	8.60888	8.34135	7.15862	8.69723	8.18937	8.55376	7.33176	9.0029
RP11-466P24.7	5.27e-14	7.76585	6.51403	7.24158	7.32411	6.75467	7.93985	6.84424	7.13915	7.29612	7.25095	7.47839	7.57047	7.1106	6.87051	7.93533	8.10282	7.14301	6.3665	7.68058	7.20714	7.33612	7.07934	6.73507	7.90471	6.61333	7.19935	8.91077	8.06408	6.72965	7.8509	7.55177	8.06626	7.18764	7.83537	8.37577	6.48282	6.85011	7.28142	7.7148	7.43263	7.0259	6.86754	7.09327	7.47292	6.87705	7.61732	7.6497	6.02457
ATP13A2	5.32e-14	9.06557	8.06754	9.06462	9.44895	9.17266	8.04204	8.86967	9.04789	9.12752	8.92745	9.08778	9.9014	10.1614	9.33771	9.36673	9.93932	9.4748	8.89671	9.45095	9.23839	9.18458	9.19994	9.25221	9.05647	9.2924	9.46869	9.74042	8.83565	8.86629	9.89894	9.02706	8.94775	9.16789	9.21152	10.518	9.12466	9.09536	8.33734	9.59686	9.78703	9.33583	9.54164	9.58705	9.77519	9.33952	9.21648	8.51154	9.40836
RP3-406A7.7	5.34e-14	8.1213	7.38395	8.83959	6.70085	9.97884	8.37439	6.61996	7.3315	7.99892	9.06386	7.01021	8.65629	7.81088	8.88438	10.2673	9.75296	8.08337	6.12787	7.80404	6.98045	8.36708	8.14958	7.43505	8.79029	8.59772	5.96191	8.64192	7.85707	8.70709	7.19349	8.24118	6.68589	5.76015	7.80542	9.87696	7.3708	7.39275	5.95766	4.316	6.08343	9.13851	8.14492	8.13171	6.80598	7.8133	8.34761	7.1776	7.65314
PCDHB9	5.36e-14	7.88211	7.35762	7.21082	8.7904	8.37226	8.03765	8.31085	8.02176	8.22635	7.42955	9.18211	10.0046	7.21465	8.79421	7.4359	5.69728	7.32832	6.85449	6.42417	8.26435	7.84375	6.37894	8.28881	8.01505	8.59361	8.45463	8.08894	7.96027	7.36323	9.29811	8.72397	7.91779	7.44316	8.52687	7.24952	7.77588	8.10619	7.22626	7.43319	7.1996	7.74577	9.02875	8.44687	7.35349	7.97628	7.66435	8.7127	6.91107
SMO	5.39e-14	7.80455	8.62947	7.28718	9.37033	7.91563	9.65201	8.69425	9.13536	9.56413	8.54219	8.62582	8.81069	8.99633	8.80262	7.11387	8.61788	7.90097	8.18317	8.59656	9.50356	9.07341	8.35837	9.25633	8.60195	8.73241	7.47018	7.9407	8.73385	8.5713	9.25482	9.69466	9.43793	8.3759	9.45268	7.16028	8.98484	9.07356	8.86818	9.31181	9.0673	8.60261	8.04412	9.15237	8.45747	8.80933	9.63953	8.85706	9.99833
GPRASP1	5.41e-14	11.0272	10.3127	10.8385	9.48468	10.1664	11.1169	9.80254	10.0735	9.74956	10.9353	9.78133	11.7452	9.66096	10.293	11.3786	12.4471	10.662	8.67086	10.5649	10.6707	10.2703	10.2221	10.3377	10.8897	10.735	9.5921	11.9867	10.6311	10.78	6.54477	10.3488	10.0232	11.3679	11.0046	12.217	8.94738	10.8716	11.4437	9.89087	9.39669	10.5564	8.59189	9.90831	10.1425	8.54302	10.6712	9.71942	9.51444
KIF2C	5.48e-14	8.76746	8.92062	8.24658	9.24034	7.78893	8.57958	9.42208	10.1953	8.80174	8.0981	7.93477	9.21648	8.66082	7.97914	7.83647	7.98934	8.43637	8.99447	8.60439	9.45517	9.07905	8.95881	8.89438	9.29891	9.22399	9.33798	8.38343	9.39208	9.47607	9.48201	9.65807	9.708	9.42668	9.64814	7.70637	8.75165	8.95842	7.97309	9.24173	9.28582	8.7337	8.59252	9.40282	8.11613	9.87341	8.30258	8.69002	8.69198
SP100	5.62e-14	7.75538	9.62648	8.63495	7.99373	8.9082	8.21417	8.05358	7.75594	7.53138	8.34066	6.95131	7.22788	8.99551	8.55457	6.75288	6.7094	9.0029	8.78512	9.01548	8.53373	7.62605	8.11014	8.77427	8.14436	7.46017	8.42922	8.16158	8.11667	8.1432	8.1906	6.83374	8.09169	6.96324	7.92478	6.72229	8.37451	8.23993	9.20317	8.13622	8.39524	8.06396	8.10768	7.50618	9.52835	7.66909	8.61802	8.17702	8.93008
CHRM1	5.7e-14	8.03582	4.08376	8.12607	5.19222	4.83731	7.59223	4.43732	6.5133	5.3549	7.43344	8.41463	9.81356	4.3488	6.54811	8.89255	10.4216	7.06766	4.10123	7.9043	4.19891	6.47277	7.64136	5.52706	8.26861	6.16617	4.29283	9.62635	7.62358	7.63727	5.30768	4.17247	4.47578	5.80537	8.61853	10.7594	4.80799	3.83967	2.27143	5.00608	3.87033	7.08952	3.66409	3.9583	6.24234	3.89885	7.90943	3.71931	3.88321
GRIN1	5.71e-14	7.25145	6.26759	7.10719	5.90454	6.86826	6.95792	6.06401	5.87004	6.61783	6.87281	6.68994	8.81706	6.15613	5.87371	7.00677	9.37321	6.28211	6.26923	6.33237	5.54004	5.09668	6.7333	6.04846	6.9755	6.28321	5.80123	8.54089	6.78052	6.0712	6.14863	6.15434	4.76739	6.26571	7.31918	9.1785	6.3147	4.63959	5.88244	6.32836	6.19465	6.8769	5.84648	5.37891	5.89365	6.39751	6.41923	5.82521	6.20653
PLOD1	5.82e-14	9.89433	10.6092	10.0812	9.9859	10.0695	9.60892	10.0193	9.54307	10.3111	10.4017	9.23799	9.39914	10.6828	9.76014	9.21428	9.43472	10.179	10.4968	11.0489	10.7941	10.5367	9.62803	11.7078	9.92654	10.2589	10.9316	9.87294	10.3278	10.4811	10.1053	10.3172	10.491	10.998	9.78868	8.99105	10.0312	9.92386	9.64622	10.2471	10.6311	10.0846	9.6983	10.1633	10.8205	9.34361	9.5646	10.1872	10.5315
SPRYD3	5.88e-14	9.76173	9.08649	9.93701	8.72682	9.78241	9.48201	8.82223	8.7621	9.08465	9.71459	9.30179	10.7811	9.21606	9.99405	10.3265	11.4119	10.4148	9.33468	10.3631	9.30356	9.01655	9.15916	9.30808	9.42098	8.95803	9.18501	10.772	8.84484	9.23511	9.1807	8.8412	9.09091	8.93907	9.41593	11.3006	9.9312	9.02079	10.3342	9.07303	9.55267	9.70771	9.03511	8.94502	9.94526	8.71605	9.47899	9.31738	9.61281
AK021933	5.92e-14	7.76781	6.50419	6.69816	5.81445	7.41667	6.85819	6.76372	7.95266	7.20258	7.36615	7.97971	7.40966	6.67144	6.75897	7.8391	8.36309	7.46197	6.80637	7.41885	7.43408	7.44596	6.96615	7.13719	7.85795	7.68934	7.59305	8.00335	7.34127	7.53175	7.01872	7.22949	7.0346	7.86386	7.35416	7.58957	6.54348	7.14581	6.94227	7.24414	6.81368	7.26272	7.34583	7.03133	7.40989	7.77391	7.09729	6.98337	7.53079
NEDD4L	5.92e-14	9.09442	8.92116	8.94969	8.57504	8.69723	9.54718	8.88489	9.06035	7.97167	9.00477	7.09018	9.13113	8.19989	8.32561	9.10483	10.1291	9.01716	8.38113	8.66605	8.78803	9.42695	7.64723	8.53448	9.3285	9.30281	7.85035	9.57848	9.59436	9.07724	7.61552	9.38204	8.61929	7.78032	8.68951	9.95872	8.70828	9.02382	9.36493	9.29073	8.47998	9.4011	9.05963	7.32189	8.6793	9.51289	9.04525	8.27775	8.54145
TCF12	6.01e-14	10.9694	11.5064	11.04	11.3416	11.0614	10.3914	11.3435	11.9484	11.884	10.9925	12.3856	10.6587	10.901	11.0875	11.6893	9.96953	10.4403	10.6646	10.2523	11.1326	10.8474	11.884	10.9516	11.4926	11.5696	11.728	11.0648	11.5136	11.6473	10.7328	12.4109	11.3094	12.0651	11.7659	10.382	11.3837	11.2943	10.9418	12.1207	11.364	11.3204	12.2384	11.585	10.8572	11.941	11.5046	10.3223	10.2731
SCG5	6.02e-14	11.5885	11.6561	12.0317	10.9785	11.6385	11.2291	11.096	11.0591	11.2943	12.3228	12.1187	12.5051	11.7018	10.8321	12.4386	13.1083	11.7546	11.6112	9.7877	11.5555	11.2443	12.2626	12.1853	12.0601	11.2577	11.3076	12.8301	11.899	11.3067	10.2238	7.58984	10.825	10.3726	11.4522	12.9402	10.5007	10.9283	10.2552	10.9155	8.84666	11.5124	9.8184	12.113	11.5968	10.9249	12.1686	11.0416	11.8825
B3GALT2	6.06e-14	7.95056	5.56264	7.25317	4.82952	6.94053	7.70768	4.67169	7.62759	6.1776	7.35762	8.38726	7.93487	5.38439	7.05956	8.93064	9.72469	6.74753	3.34054	6.26923	5.28821	7.05726	7.76599	5.76177	7.86908	7.84271	6.92915	8.62838	8.02905	8.47068	4.24099	5.53259	5.91329	7.4883	5.16619	10.2284	4.78701	4.82329	4.57757	7.61816	5.87327	7.86669	8.07356	5.5659	5.92993	8.29853	8.25854	1.8677	3.75683
RNF41	6.12e-14	8.21082	8.48922	8.21028	8.66029	8.27851	8.26202	8.46689	8.55296	8.51576	8.26779	8.98162	8.97099	7.95825	8.15347	8.88906	9.7209	8.34582	8.46387	8.65152	8.34482	8.36364	8.81104	8.65962	8.52883	8.6976	8.29866	8.94671	8.42094	8.66227	7.48941	8.05971	8.14334	10.7741	8.22103	9.43793	8.6681	8.29557	8.18469	9.36643	8.06369	8.48716	9.01655	7.81032	8.55267	8.93575	8.24328	8.32387	8.33443
SEMA4D	6.14e-14	10.2103	8.49556	10.6681	7.38775	10.8644	8.85172	7.18846	8.74719	7.95974	9.80148	7.84216	10.0331	8.54734	9.99313	10.9579	10.5678	9.15423	8.06991	8.62165	8.05625	10.4506	8.66833	7.83015	9.51939	9.84356	8.09116	9.41282	8.28214	9.76808	7.97628	7.6534	8.39678	7.42757	8.79632	10.9959	8.97185	8.13596	8.53373	7.8938	8.33341	9.59313	8.70544	8.62287	8.25967	9.56113	9.31822	7.53444	8.72747
KCNJ6	6.18e-14	8.22555	7.49263	7.91861	9.18514	7.01758	8.31498	9.05353	4.5293	7.59824	8.56252	6.27712	9.67979	6.82741	6.61894	8.47515	9.86495	7.39567	7.31918	7.86855	7.02144	6.40849	8.30573	6.80425	8.3134	5.70651	7.98775	9.38061	7.35981	7.64035	8.35333	5.9188	5.62005	5.62863	9.04252	9.67826	7.33394	5.60745	6.38938	6.99385	6.1232	7.47825	5.46492	8.40448	6.82345	6.2801	7.86565	7.86805	6.01826
FAIM2	6.23e-14	10.7443	8.79481	11.0231	7.58786	10.7588	9.81507	8.00835	10.012	9.05882	10.3632	11.154	11.2779	9.11369	10.2325	11.3701	11.997	10.2578	9.11811	10.3232	9.64726	9.66425	10.478	9.04059	10.4125	10.0559	8.9518	11.5578	9.61059	10.2552	9.09442	7.84587	9.01424	9.82777	10.3755	11.9393	9.82616	7.73249	7.73159	9.36124	9.20129	10.4175	10.25	9.29305	10.6768	9.92715	10.2015	8.4981	9.43762
CDH11	6.29e-14	10.2838	10.8163	10.8343	10.6614	9.84291	10.4873	10.5289	10.4048	10.216	10.6248	10.6499	9.77202	10.2433	9.73074	9.50204	9.37811	9.44137	11.2728	9.82138	10.1047	10.4656	10.5189	10.0757	10.7827	10.4943	11.4664	10.9205	10.6007	9.96465	10.2798	10.5367	10.9303	10.4797	10.1692	9.24372	11.0508	10.0912	10.2751	10.1552	10.9856	10.5889	11.7872	11.0723	10.8052	10.8058	10.2204	11.286	10.9992
FAM81A	6.38e-14	7.35058	7.06945	7.61121	7.63298	7.36205	7.77243	7.37092	6.39081	7.1435	7.41608	7.04534	7.57723	7.30613	7.51621	8.08981	8.87464	6.85314	7.44528	7.19175	7.70721	7.2249	7.22719	6.8813	7.14879	7.06558	7.36109	7.42461	7.61761	7.21449	7.83564	7.71275	7.20488	7.28912	6.75421	8.97809	7.14053	7.03532	7.10172	6.93398	6.94295	6.90834	7.53651	7.61746	7.30985	7.5234	7.23346	7.5417	6.81549
CELF6	6.45e-14	9.16652	8.37894	8.54375	8.047	9.29781	7.82447	7.95222	7.73159	7.513	8.53288	9.23363	9.1379	7.97867	8.18877	9.56685	9.708	8.32617	9.22827	8.87826	7.80986	8.97465	8.16158	7.59591	8.53784	8.57371	7.54899	9.00236	8.73619	8.17689	6.981	7.10524	9.12565	8.39347	8.34793	9.39669	8.99525	7.18472	9.27709	7.99709	8.18067	9.01655	8.14208	8.0671	7.40786	7.97825	9.09076	8.20571	8.78347
SLC12A5	6.47e-14	10.9771	7.1856	11.1201	7.77699	9.30438	9.05058	7.60594	7.53187	3.15439	10.4053	8.50436	12.0495	7.6707	7.99415	11.4063	12.7913	9.38825	7.32423	9.36751	8.3517	8.72965	9.53436	6.64162	10.5004	7.96051	7.5112	12.1568	9.72576	9.56051	8.2183	7.80768	8.84732	6.95659	10.5741	12.5809	7.41681	7.75756	7.14021	7.48842	7.65382	9.60308	7.28278	7.7058	8.84215	7.2711	9.91421	7.63756	7.916
DOCK9	6.55e-14	8.41828	8.65694	9.45008	9.59844	9.93329	8.33283	9.35062	7.15073	7.71021	8.93331	8.32342	8.11555	7.33516	8.90203	9.70892	9.54718	7.653	8.48998	7.77015	7.88342	8.5159	9.04417	7.4398	8.779	8.99498	8.18422	9.2349	7.86591	8.21135	7.94129	7.09231	7.88267	7.54669	7.80174	9.59801	7.57672	7.1057	10.3532	7.03269	7.85334	8.55267	7.70023	7.8964	8.31672	7.39489	8.16252	8.05707	7.25276
CALN1	6.7e-14	8.44804	6.26397	8.9675	6.89052	8.65642	8.16043	6.39615	7.26553	6.09849	8.40789	8.71957	8.86107	6.579	8.01373	9.36464	9.62954	7.21574	6.14026	7.17627	7.78602	8.031	7.6604	6.47615	8.48868	7.5929	6.63356	9.08324	8.26937	8.02107	7.14136	6.60518	7.15504	7.40935	8.53123	9.49413	6.9714	7.20379	6.21085	7.04826	7.07465	7.76821	7.09573	6.99613	8.03315	7.61298	8.00716	7.10219	6.54308
PCDH7	6.76e-14	8.25823	6.41695	8.31161	6.98839	7.2507	7.74759	7.70966	8.65719	9.16365	9.07724	8.68144	9.0541	8.60799	8.90281	9.27737	10.0448	7.90253	7.63996	7.36696	6.4531	9.22616	7.22108	6.86493	8.84532	8.00954	6.39364	9.76687	8.89193	9.22263	8.04534	8.56774	8.49541	8.80572	9.21841	10.3329	8.53513	7.92974	6.10503	7.95638	6.65557	8.41423	8.12334	8.09767	8.28105	7.78614	9.02816	7.77492	6.81949
ELFN2	6.83e-14	9.27601	7.75692	7.95638	6.9971	7.74185	8.29531	7.12294	8.96771	6.98839	8.45051	8.98948	9.29456	6.75791	8.73918	10.3425	10.0934	7.59173	6.64863	7.62574	7.11329	10.1061	9.03787	7.40299	9.44194	8.90481	7.96394	9.20529	8.86188	8.43114	7.01454	7.39331	7.93999	7.353	8.08813	9.92263	8.33997	6.41222	7.33246	9.46327	7.20514	8.2174	8.63469	7.17043	7.07405	8.91299	8.45023	7.33901	6.34438
CALY	6.89e-14	9.1005	4.97121	8.55853	6.27637	7.05905	9.15792	6.36461	5.92609	6.58958	9.17701	6.30749	10.3501	5.18267	6.82658	9.4574	11.3194	8.443	5.78605	8.27236	6.74164	4.65282	8.23334	3.41607	8.8025	5.66617	5.76752	10.0638	8.42316	8.07971	6.70563	5.39056	5.96281	6.43118	8.75582	11.0079	6.14904	5.31733	4.85245	5.91444	6.51484	9.19083	5.74823	3.44853	6.36548	6.60897	8.41463	5.78234	6.39804
CDK5R1	6.89e-14	10.0869	7.85103	9.51654	8.91568	8.68798	9.2273	8.68273	10.0327	8.5201	9.61957	10.4615	10.7618	8.21765	8.30506	10.5533	11.3967	8.42409	7.12951	9.07117	9.36263	10.4094	8.54884	7.87897	9.83592	9.75077	7.77912	10.845	9.94855	9.52437	7.3429	9.29086	8.49286	9.70315	9.68197	11.3795	7.89301	8.37439	6.84309	9.21897	7.76612	9.12565	9.72637	9.03941	7.97322	9.63343	8.72642	8.20319	7.12489
CYS1	6.9e-14	7.83701	5.51476	7.28628	5.84878	7.22812	6.64345	6.58388	6.67505	5.61394	7.3777	7.04064	7.05894	6.42571	7.65285	8.71861	8.19528	7.29587	6.73428	7.4841	6.59851	7.14977	6.13078	6.41976	7.04212	7.77176	6.07776	7.57804	6.65453	7.13376	3.88656	6.61462	5.5174	7.49885	5.94413	8.23882	8.09451	6.4816	8.78259	6.88887	6.20785	6.74396	6.95252	5.18645	5.46148	7.92952	4.88293	5.87218	5.767
PRR18	6.92e-14	10.1732	8.24341	11.748	8.1798	12.0165	9.00982	8.38948	8.14507	8.00617	10.2789	7.94622	9.61412	7.97985	10.3333	12.2358	11.3397	8.62218	8.38242	8.75245	8.67165	9.21406	8.98036	8.33217	10.2966	10.5612	7.98551	9.79845	8.87578	9.95527	8.66199	7.76714	8.45204	8.34665	8.04161	12.0795	9.17575	8.53979	6.57132	8.04204	8.35461	9.83545	7.35654	8.63806	8.42395	9.1092	9.45866	8.59525	8.2591
NMB	7.02e-14	10.934	11.7104	11.0717	10.7553	10.9309	10.9218	10.8673	13.3475	12.2965	11.6709	11.5454	10.7168	11.4191	13.8733	11.5035	7.92094	11.9867	13.0042	10.3	12.5256	11.3239	12.1912	11.2474	10.7707	11.4373	12.4582	9.56321	13.2579	12.4312	10.9947	11.0093	10.4104	9.14022	12.6069	8.89425	12.7682	11.3894	8.95963	10.9611	12.1792	11.2577	13.5668	12.8696	10.994	12.0601	11.9427	12.6326	10.2978
LPL	7.05e-14	9.81989	10.3351	12.225	8.28671	11.7294	11.0272	8.54062	10.3567	12.9	10.997	11.8885	9.45765	12.3806	11.1318	10.1633	9.41738	10.2172	11.2083	11.3951	12.105	12.0988	12.8696	12.8136	11.4292	10.5002	12.5627	10.9034	11.4201	12.7796	10.1389	9.73249	11.2962	14.1619	9.42722	10.6152	8.69267	12.254	8.81043	12.1013	10.0625	11.6423	9.44427	10.3848	12.1393	10.2179	8.70422	10.5499	10.3751
TWSG1	7.07e-14	10.295	11.5024	10.5394	10.904	11.3591	10.9303	10.4811	10.2143	10.6691	10.9516	9.51515	9.697	10.7858	10.1452	9.50063	8.71646	10.5923	10.7921	11.4415	9.65369	10.3559	11.0039	9.9629	10.5378	9.80613	11.103	10.3148	10.6887	10.4642	9.35125	9.20671	10.5459	10.3989	9.62569	9.12965	9.8145	10.7738	10.9404	10.4053	10.75	10.8992	10.8569	10.7152	11.4218	9.85935	10.5923	10.6425	11.2349
PPP1R3E	7.08e-14	8.97863	8.24716	8.62192	7.40493	8.88819	8.19374	8.1508	7.28127	7.33964	8.00152	8.87941	8.773	8.29148	8.03716	9.00249	9.59719	7.50732	7.50074	8.95675	8.07768	8.01996	8.35663	8.03765	8.36364	8.55185	7.20429	8.25869	8.51696	8.31975	7.9221	7.52504	7.30856	8.00459	6.68994	9.37281	7.81088	7.40344	7.11497	6.57831	7.50969	8.69734	7.95056	7.90746	7.16685	8.0474	8.2174	6.98079	9.20292
EPB41L3	7.1e-14	10.3202	10.117	11.8675	7.53941	11.3837	9.45903	7.55873	8.41028	7.94812	10.448	10.6493	10.6866	9.28166	10.4434	11.6275	11.7532	9.90555	9.35154	9.65972	7.85875	9.2596	8.85656	9.04789	10.2212	9.52624	8.44415	11.3715	9.07131	10.206	7.48941	7.28359	9.49681	10.2756	9.708	11.9236	9.4515	8.28029	10.4253	10.8038	9.12625	10.0592	9.68055	8.92826	9.65145	10.4961	10.6828	9.26472	8.9069
CAMK4	7.12e-14	7.69891	6.63886	7.61974	6.14616	6.91163	8.16	6.80243	7.19309	6.72341	7.85927	7.80379	8.95317	7.9393	8.03385	8.37957	9.5359	6.97523	7.13611	7.10156	7.28307	6.92371	8.45051	7.20579	7.68259	7.65003	6.60161	8.69833	7.53187	7.91588	9.01082	6.8444	6.81081	7.04573	7.8921	9.79845	6.55212	7.31049	7.11664	6.03103	6.34167	7.86132	5.93993	7.50181	6.90628	6.12506	7.51064	7.82067	6.53867
TCTN1	7.12e-14	9.36805	9.48095	9.11392	9.70535	9.26392	9.50484	9.44307	9.52237	9.83205	9.60427	9.14158	8.94775	9.63614	9.40343	8.97756	8.15197	10.7704	9.73161	9.55604	9.63551	9.15036	9.32905	9.55995	9.21563	9.43176	9.13549	9.1668	8.35398	9.13446	9.98088	9.25107	10.4048	9.64814	9.52639	8.58573	9.82712	9.51654	9.34692	8.91145	10.0795	9.3165	9.25341	9.53574	9.83607	9.43351	9.7833	9.54004	9.90733
ZNF25	7.15e-14	9.54545	8.79551	9.59886	9.21428	9.29563	9.08441	9.23363	9.58356	8.66764	9.43238	10.119	9.84163	8.82873	9.0897	9.95085	10.8194	8.73385	8.62675	8.89296	6.85514	9.25857	9.04394	9.00221	10.1601	9.44168	8.73398	10.2768	9.52578	9.22668	9.43703	8.79255	8.82223	10.1128	9.15682	10.6996	9.0839	8.92351	9.41315	9.1575	8.63034	9.18316	9.9375	9.08035	8.75188	9.89858	9.0912	9.03361	8.41135
NLRC5	7.25e-14	8.72042	9.43778	8.90227	9.49826	10.2953	8.95488	9.3533	8.36099	8.93575	9.27232	9.05752	9.94985	9.57902	9.35664	8.27595	8.07386	9.59497	9.38003	8.54004	9.80028	8.97686	8.46871	8.7442	9.97211	8.85172	9.76944	9.29866	8.54912	9.27124	10.1396	10.2823	9.17644	8.95471	9.48267	8.53719	9.48879	9.66651	9.76776	9.74195	9.65582	8.77719	9.88054	9.39759	9.75739	9.53662	9.80446	8.6921	8.96281
VCAN	7.25e-14	12.2384	12.0636	11.4794	12.5227	11.8689	12.4664	12.5256	12.3321	11.2269	11.7308	12.4203	10.9353	12.1771	12.7116	11.5897	10.3236	12.1207	12.4937	10.736	9.80221	13.2342	12.0133	11.7738	13.157	12.6887	12.271	12.1427	12.7442	12.2893	11.0614	11.713	13.7372	11.4469	11.8435	10.815	12.3755	12.0165	12.8454	11.8025	12.3278	12.7952	13.1956	11.6171	11.3015	12.3559	12.0182	11.9122	11.8477
CCDC167	7.37e-14	8.66979	8.96445	8.44166	9.35062	8.80139	9.5736	9.68505	10.7078	9.06585	8.5386	9.71747	8.83592	9.77828	8.91708	9.50264	6.34473	8.51785	8.8263	9.23908	10.6976	9.60023	9.44252	9.13715	9.2596	10.4857	9.55515	7.01576	9.7426	9.93687	8.66071	8.07371	9.95249	9.43548	8.69309	7.24119	8.56763	9.5073	7.0183	9.60308	9.04471	9.20187	9.86817	9.82444	8.85158	11.0019	8.82393	9.50456	9.29866
GNB5	7.38e-14	8.33024	8.02314	8.20801	8.31525	7.56864	8.0234	8.29099	7.78085	8.38699	8.12084	8.45633	8.79578	7.64322	7.90392	8.54926	9.68134	8.07683	8.0846	8.18698	8.53179	6.98502	8.29581	8.05517	8.49057	7.62405	8.03739	9.1319	8.49705	8.37212	7.17214	8.37254	7.81827	8.24505	8.87006	9.52308	7.70566	7.99226	8.4762	7.90839	8.01261	8.0723	7.98855	8.24925	7.77338	7.58042	8.15313	7.6855	8.0725
MAP1LC3A	7.51e-14	9.82583	10.5846	10.2921	9.99735	10.3581	9.64352	9.96565	9.46988	10.1504	10.5603	8.58249	10.3576	10.3683	10.0719	10.5964	10.6866	10.0137	9.78529	10.0934	10.7899	9.53853	9.61146	9.56685	10.0253	9.20063	10.6206	10.4682	10.3193	9.37268	10.836	10.4687	8.73635	8.12146	10.0625	11.4201	10.2313	10.3062	11.3846	8.62702	10.0363	10.1684	9.32412	10.4125	10.6316	9.41619	10.3312	9.95051	9.82744
SLC26A4-AS1	7.61e-14	7.63158	5.77391	5.88789	7.0916	6.72795	8.22706	7.12624	5.96673	6.33114	7.02276	3.42331	8.37172	7.34672	6.10615	8.00032	9.35723	6.60719	5.57813	6.11508	5.22558	6.56351	6.76797	2.78931	7.32016	5.88337	1.25232	8.67461	7.23111	7.31763	6.41889	5.96449	6.04376	5.74032	7.07978	9.00667	5.70703	5.94774	6.13973	6.41465	5.6695	7.11586	4.98392	6.0433	3.53332	5.45624	6.81566	6.6005	3.63939
TSPYL5	7.62e-14	9.1789	8.46157	10.4271	7.71694	10.0208	9.13643	7.85914	7.56876	8.15696	9.61166	8.00018	10.0342	8.78101	9.47343	10.0626	11.033	9.78547	10.0243	9.00249	7.49313	8.355	9.05459	7.68693	9.27136	8.39201	8.00604	10.6598	10.8903	9.10282	7.63569	10.6198	7.89252	7.17652	8.92338	10.953	8.99648	10.428	9.9312	8.43679	8.39038	9.15633	8.05971	7.93503	10.6107	8.65811	9.19256	8.97686	8.08956
BRINP1	7.66e-14	8.86067	6.811	9.13577	7.64201	8.47124	9.18923	7.35723	7.47046	7.18376	9.04193	10.0966	8.98001	6.96701	9.50063	9.67826	9.89055	8.73866	7.89872	8.89466	6.66497	6.85778	8.8793	6.41202	8.58843	7.78318	7.41556	9.57005	8.51549	7.77561	10.7516	7.67691	6.98753	9.34218	8.68583	10.2835	8.82406	9.5237	7.23746	7.2902	7.06383	9.36178	8.23828	7.14867	8.7079	7.38618	8.00484	9.15969	7.69906
BSN	7.82e-14	8.93805	5.29924	8.79659	7.81885	8.01827	9.02625	6.63273	7.46964	7.31528	8.80327	8.78246	9.76593	5.26177	8.10365	9.47989	10.7537	8.04427	5.19933	7.83794	5.37708	7.94665	8.38165	5.44742	9.30134	7.96738	7.5006	10.1085	8.09743	8.39648	7.68312	8.07658	7.72904	8.73385	9.28427	11.1357	7.98646	5.15138	6.57484	7.66285	7.26124	9.1287	7.4921	7.13733	7.87694	7.14963	8.34876	5.95659	5.29474
FAM217B	8.06e-14	10.5415	9.65145	10.7242	10.2527	10.4385	10.3523	10.5302	10.2074	10.4633	10.8199	10.7366	10.8024	9.72926	10.5056	11.2164	11.7241	9.69944	9.76776	9.75348	9.69642	10.4682	10.6786	9.69944	10.452	10.5908	9.81491	11.346	10.1853	10.5579	9.68909	11.74	10.4544	10.7723	11.0416	11.4605	10.5453	10.1159	10.5103	9.86476	10.1256	10.2151	10.1514	10.7315	9.86295	10.0802	10.4026	10.5474	9.98555
PBX3	8.1e-14	9.93489	10.3737	9.85131	10.4017	9.95656	10.2334	10.1779	10.4245	10.2984	9.70187	10.6327	10.1644	10.2658	9.87144	9.49322	8.78203	10.0602	10.5051	9.24693	10.3589	10.0309	9.85163	9.40343	9.95872	10.9534	10.5122	9.88192	10.1467	10.1145	10.7201	10.6472	10.3236	10.9245	10.5474	9.57578	10.7671	9.7007	11.842	12.1875	11.086	9.41225	11.2131	10.7875	10.0301	10.382	10.5766	9.59405	10.2151
TMEM151A	8.23e-14	8.09589	3.8529	9.53794	3.60648	9.75739	6.83105	4.51269	7.37376	4.57849	8.21649	4.87918	8.2143	3.1212	8.08679	9.72182	8.71022	7.01511	4.44173	4.45853	6.86241	7.40493	6.78608	4.17676	6.7211	7.28307	3.54868	6.91934	4.7857	7.52517	5.55648	4.51576	3.72108	5.27187	5.20496	9.96938	4.50456	3.37114	3.6645	3.48689	4.02897	7.57461	3.22458	6.65923	5.61107	8.46517	7.89168	4.01036	3.49014
CPXM1	8.33e-14	8.43466	9.85969	6.92187	11.0845	7.38606	7.96228	11.2065	9.49651	10.1703	8.77007	10.491	9.14009	9.90956	8.48546	9.10772	5.11391	6.92353	9.67358	8.61005	10.8686	9.35935	8.48831	10.3385	9.1606	8.66895	9.00037	9.74524	9.70315	9.65369	6.27745	8.76313	10.8228	4.13009	9.89726	5.31803	8.419	9.08638	9.94589	10.7232	7.7633	9.32167	9.49754	8.8213	6.98892	10.7805	5.19559	8.85105	5.69472
C10orf35	8.39e-14	8.79445	7.14472	7.85334	7.9667	8.44329	8.67554	7.75355	7.3708	7.4294	7.68719	4.82563	9.33344	8.52025	7.33544	8.65694	8.95978	7.74453	7.99528	7.88169	8.26459	8.50372	8.18576	8.27914	8.17883	8.0645	8.04427	8.32973	8.04327	8.12171	7.60931	6.57087	8.67624	5.53956	9.15503	9.49886	7.63341	8.78454	7.59014	7.61402	7.85602	8.48756	6.90156	8.48662	8.601	7.48319	8.39975	7.43382	7.40188
CCDC28A	8.44e-14	10.355	10.3372	9.82999	9.6184	10.0563	9.08666	9.95694	9.33062	8.67192	9.64206	9.82777	10.4215	9.51654	9.93893	9.99718	11.0474	10.8425	9.99405	10.1075	9.69222	9.77753	9.49199	9.95957	9.52835	9.4397	9.31951	10.491	10.115	9.82365	8.91134	8.85013	10.183	9.28785	9.44227	11.076	9.80254	8.83902	10.6774	9.16114	9.0741	9.59194	9.90192	9.5362	10.0977	9.72245	9.57462	10.2232	10.8816
CD93	8.46e-14	9.80148	10.6958	10.4745	9.3956	9.51886	9.94084	9.46327	9.19023	9.50086	10.8239	9.1044	8.08927	10.6745	9.0167	8.36352	7.73159	9.94774	11.4031	9.8959	10.1783	9.45034	8.9829	9.74321	9.56933	9.94165	10.7136	10.2465	9.49917	8.89112	9.29629	9.95426	9.37006	8.85975	9.58462	8.2575	10.4827	9.82681	11.2957	9.51713	10.6405	9.74441	9.67094	10.4318	10.4611	9.10833	9.71053	11.4072	9.72759
SAMD9	8.5e-14	8.26861	9.02382	7.89827	9.86613	8.94527	7.78306	10.6081	8.53483	8.12442	7.66191	7.27575	7.72972	8.83188	8.30177	7.5093	5.3189	8.88334	8.85315	9.31277	7.42025	7.6004	7.50402	8.73304	7.56817	8.02205	8.44354	7.63979	7.85875	8.53622	7.2364	7.51621	8.57091	8.86932	8.15659	6.54074	8.54793	9.11968	8.59539	8.56954	9.15368	7.9849	8.33662	7.71897	8.29932	7.36991	9.07131	8.08749	8.95425
GLIS2	8.53e-14	10.2208	10.8354	9.92386	9.69206	9.74244	10.0246	9.76203	10.4007	10.2279	9.02079	10.3954	10.4802	9.93621	10.174	10.133	7.83258	9.67888	10.221	9.88646	10.0652	9.68535	10.4506	9.88054	9.73133	10.5649	9.90733	9.76607	9.72911	10.1933	10.0659	10.605	10.0196	10.0064	10.6472	8.65558	11.0984	9.49257	10.787	9.72454	10.7484	10.0141	10.3472	10.2174	9.38328	10.0649	9.78204	10.1637	10.7127
CNTN3	8.57e-14	9.79791	6.01568	8.7985	2.09153	7.90666	8.28777	3.71701	5.28314	5.45006	8.58262	8.93145	9.48468	5.56634	6.9816	9.84191	11.2016	8.68012	6.50253	7.30671	5.98249	7.78108	7.61121	5.47227	8.98848	9.52894	5.71136	10.0309	8.07697	8.55892	3.65438	5.78185	5.95531	6.14079	7.91026	10.5867	5.6695	6.05351	7.37142	6.03474	5.97626	7.49928	9.63368	6.00759	6.18572	8.78967	8.32761	6.09445	4.53118
BCL11A	8.59e-14	8.69013	7.80443	8.46584	8.63736	7.21433	8.58942	8.60721	9.09689	7.07495	8.77194	6.46436	9.31738	7.49868	7.66949	8.48522	9.82936	7.46802	7.46034	8.47785	9.3898	9.47681	7.08022	7.71007	9.13864	7.77338	7.33557	9.48849	8.87723	7.92843	6.66816	8.77581	9.21306	7.8864	8.45131	10.1254	7.46964	8.94046	7.53508	9.32516	7.01797	9.18344	8.2368	7.07405	7.62306	7.45975	7.63286	8.39569	6.596
BEGAIN	8.62e-14	8.5196	8.46289	8.62438	7.21952	8.55185	8.51771	7.70053	7.69082	8.6568	8.35423	8.78524	9.09631	8.27041	7.91224	9.12953	9.94904	7.9276	8.25779	8.08894	8.54965	8.7287	8.27017	8.98559	9.10455	8.25051	7.8212	8.62772	8.77412	8.37846	8.34876	7.90702	7.98447	8.67512	8.52354	10.1147	8.64475	8.19279	8.74146	8.54524	7.85771	8.14334	7.86503	7.91238	8.72542	7.79594	8.47998	7.49357	8.19645
PINK1	8.7e-14	11.3239	10.6231	11.0674	10.9846	11.2824	10.5883	10.3576	10.811	10.8385	11.3755	11.0734	11.5791	11.089	11.6195	11.7199	12.1814	11.1976	10.4678	11.222	10.8099	10.4267	11.6829	10.7687	10.5944	11.2365	10.6211	11.7385	10.8408	10.8385	10.4448	10.5334	9.93584	10.2411	11.3776	12.1749	11.2753	9.72732	10.9309	9.69745	10.6675	11.1432	11.3827	10.8756	11.0768	10.8948	11.3767	11.0831	11.6548
RAPGEF5	8.72e-14	9.8184	8.13461	11.0839	7.87398	11.147	8.86078	7.85978	8.22025	7.64723	10.3834	8.06102	9.7125	8.15287	9.92171	11.0436	10.8624	8.99243	7.77535	8.21472	8.3739	8.83946	8.44995	7.55846	9.76745	9.80028	7.93547	9.81251	8.10233	9.87194	7.04226	8.329	7.73701	7.53969	8.66278	10.8493	8.87032	8.55422	10.8841	7.19769	7.59096	9.54128	7.776	9.03495	8.43226	8.90094	9.65946	8.4781	7.35072
CREG2	8.96e-14	9.78241	5.76648	8.94461	6.23035	8.29958	8.99818	4.91432	4.95516	5.30174	9.78006	5.65703	10.953	6.3264	7.5582	9.88021	11.2301	8.78347	6.53787	8.73256	5.16828	7.49278	8.58221	5.86349	9.44107	7.08537	6.6204	11.2057	8.85517	8.97973	4.21432	4.84139	4.85155	5.21524	9.55995	11.2951	5.26234	4.35192	4.93965	4.98882	5.706	8.82857	4.92674	3.85346	8.15131	5.36743	9.48849	6.46522	4.31114
PRKCQ	9.01e-14	8.59189	8.14507	9.08415	8.05021	9.33281	8.16606	7.96785	8.02759	8.37642	8.53653	8.43482	8.58561	8.0234	8.47184	9.34899	9.36918	8.03328	7.93177	7.23253	8.15926	8.1144	8.46651	8.20587	8.1379	8.60306	7.86818	8.41237	8.16043	8.25423	7.18189	8.0725	8.32718	8.61472	8.13437	9.60098	7.73987	8.59481	7.73076	8.42595	8.47068	8.35294	8.08249	8.57046	8.43046	8.08009	8.55106	8.12686	8.21531
OLFM3	9.05e-14	7.56124	1.92296	6.11336	2.21568	4.63669	6.31742	2.07844	5.63019	5.37312	6.99156	4.59663	8.75619	2.76267	6.7262	8.48356	10.3624	6.31689	4.73542	6.89127	6.31217	4.67255	7.00588	5.22518	7.6903	4.57239	2.32452	9.1583	6.92838	7.32477	5.25222	1.75061	3.22389	7.89925	6.41847	10.095	4.74719	4.54736	1.85456	5.21524	4.33057	7.14642	3.62706	2.94897	5.70136	5.17129	7.56625	5.55265	3.7324
KIRREL3	9.1e-14	5.9482	3.99263	6.26497	5.51118	8.86455	8.11731	6.61703	4.64763	5.08646	8.22001	4.09146	8.35788	4.98309	5.98134	8.1213	9.09608	4.8664	3.91275	6.20414	3.62928	5.30768	7.38831	4.47814	7.28278	5.63835	4.09445	7.63259	4.2778	7.74288	5.70218	5.6756	4.39393	3.40569	9.12523	9.19295	7.29728	6.40982	5.19096	3.24729	5.76254	7.79155	4.16176	3.78903	4.71548	6.74971	8.22879	4.21475	4.15145
PLSCR1	9.12e-14	10.067	11.8121	10.176	10.5175	10.4997	10.6098	10.236	10.15	10.5007	10.2683	8.94338	8.99471	11.4479	9.99735	8.57857	8.13401	10.7761	10.9892	11.017	10.7624	9.11369	9.58852	10.4443	9.38911	8.72747	11.125	9.24087	9.4424	9.96323	10.5195	10.1003	10.4258	10.6122	9.98155	8.02033	11.04	10.791	10.1273	8.51073	10.9353	10.642	10.2388	10.657	9.66096	9.69426	11.3465	10.6774	9.78616
AURKA	9.14e-14	7.87012	8.3837	7.30656	9.61638	7.40356	8.17068	9.5722	9.3063	8.4236	7.9276	6.85433	8.83959	8.1906	7.09744	6.93209	6.40116	7.36826	8.53886	7.81857	9.00422	8.46301	8.4555	7.94366	8.37039	8.64036	8.93389	7.39029	8.61173	8.74332	9.23511	9.48821	9.69371	8.44954	8.50929	7.38643	7.886	9.67948	7.05856	8.70236	8.97918	8.05926	7.74157	9.59241	7.71503	9.01548	7.52129	8.44965	7.57124
IKBIP	9.25e-14	7.52688	8.84399	7.76889	8.09277	7.48481	7.81136	8.2268	8.19851	8.26406	8.03537	6.93385	7.36082	8.4781	7.49169	6.79289	5.4824	8.56459	9.56826	7.80364	7.85809	7.94338	7.6795	8.90391	7.91278	8.03818	8.66176	7.75224	7.84245	8.22495	7.74808	7.54615	8.74933	8.33721	7.62574	6.59833	8.54868	8.21052	9.33952	8.87281	8.43388	7.97375	7.75436	8.62348	8.18217	8.05306	7.90392	8.96213	7.46245
MTUS2	9.33e-14	6.90954	5.39682	7.18791	6.74344	6.08956	7.06719	5.4112	6.50511	6.34141	7.15389	6.08199	7.85634	6.66779	6.57668	7.34197	8.38611	6.42479	5.96987	6.73956	6.7833	5.96006	6.79861	5.96673	7.02875	6.55741	6.39784	7.75355	6.6207	6.03366	6.53426	6.32912	5.86543	7.24916	7.38119	8.36126	6.49668	6.143	7.61746	6.58301	5.91585	6.48635	6.58588	6.98988	7.0112	6.63665	6.14793	6.92212	6.00737
EPHA5	9.37e-14	7.28127	6.09366	6.55348	8.03549	6.24296	7.28321	8.17244	6.89307	6.31701	6.76898	5.9424	7.06674	6.67721	7.17548	6.84857	7.93843	6.05904	5.99566	7.9148	6.36564	7.14076	7.74299	6.76359	7.48927	5.86809	7.80118	7.17637	7.38594	6.77076	6.20063	8.35717	6.02478	7.54844	7.04639	8.27674	5.96936	6.41324	6.1432	5.84648	6.25422	7.69657	8.10233	6.5684	6.76309	6.52686	7.77938	5.83093	6.34343
USP46	9.43e-14	9.39959	7.57475	9.1785	8.72339	9.08415	8.92374	8.74146	9.23462	8.29531	9.01655	10.3004	9.15321	9.3374	9.49148	10.1254	10.1504	9.0348	8.99417	9.17114	8.19266	8.99387	9.83998	8.84772	9.27927	9.28756	8.6995	9.91577	9.06491	8.94527	7.61402	8.12556	8.50436	9.05963	8.86661	10.0782	9.20804	7.70755	8.63578	8.26937	8.62521	8.76028	9.44077	8.8932	8.92571	8.9502	9.26851	8.67554	8.41326
RGS4	9.6e-14	10.4063	6.6482	10.1223	6.64002	8.1549	9.95282	5.80879	7.72893	7.86183	10.3735	9.0788	11.6919	7.36785	7.94143	11.1016	12.5256	9.76014	11.1396	10.1068	6.63655	7.71613	8.63721	10.5731	10.3093	7.39172	7.20474	11.7688	9.62357	9.61346	7.39252	6.99241	8.00377	9.08805	10.1011	12.5166	6.73379	10.4294	6.75383	8.0843	7.8964	9.56138	8.59789	5.69008	10.2544	7.55191	9.38837	9.17769	7.25255
ZC3H12B	9.94e-14	7.67124	5.93132	7.40528	5.85893	7.54704	6.92753	6.38355	7.66825	6.91263	7.36874	8.08842	7.53916	6.6191	6.93302	8.39744	8.05882	7.17537	7.22437	6.07712	7.23365	7.12117	7.44903	4.85536	7.70861	6.75564	7.0048	7.83779	6.92425	6.88994	7.29412	7.00955	8.02927	7.88077	6.94928	7.26371	6.77224	7.96686	8.4891	7.64242	6.48301	7.31215	8.22903	6.75304	6.69937	8.15671	7.59863	6.43886	7.17043
LFNG	9.95e-14	7.21002	11.0292	6.31896	10.0408	9.1346	10.4063	10.8518	7.14515	11.7519	9.72819	9.45181	9.06075	9.0227	10.1114	9.28003	5.44657	6.55011	7.64959	8.04129	9.98332	8.92934	10.9805	8.97344	10.807	11.3495	9.78106	7.72029	9.3022	9.17754	10.9892	10.7344	8.05335	5.21069	9.86017	6.94982	11.5755	7.52326	5.7116	8.67999	10.6855	9.12205	9.88631	11.7766	9.1807	9.33039	10.1753	9.40689	5.90665
BZRAP1	1.01e-13	8.70904	7.58571	8.09511	7.97672	8.25635	8.6248	8.18448	7.07067	8.38101	8.42837	9.21841	9.99473	7.18364	8.3172	9.34628	9.92316	8.56228	6.15581	8.78188	7.59374	7.81076	8.24249	6.33019	8.872	8.50358	7.71192	9.16492	8.73	8.14889	7.69851	6.96483	8.92155	8.60681	8.6695	10.1841	8.29208	7.35157	8.00764	7.96383	8.14195	8.33354	8.30748	7.57253	7.91012	8.07796	8.54076	7.66909	8.32442
GBE1	1.02e-13	11.1132	12.2688	10.983	10.9667	11.3385	11.4772	11.0317	10.9211	11.1088	11.5355	10.2221	10.1053	11.7631	10.112	9.17666	9.58119	12.6471	11.5258	12.1955	11.8689	12.2518	10.5494	12.8373	10.868	11.0272	11.7766	10.6007	12.4179	11.017	11.4031	10.746	12.7989	11.2075	11.1288	9.8324	10.9258	10.8463	10.9252	10.2264	11.4794	11.9122	10.6248	10.8277	11.6919	10.8261	10.6915	11.9953	11.2737
SIX1	1.02e-13	5.89573	7.08252	6.3073	7.44698	5.76547	6.15199	7.89353	7.23111	6.68314	6.58761	7.61434	8.72434	7.0782	5.14082	6.32149	5.68057	6.1103	7.22812	6.34617	6.77663	7.2381	7.54482	7.01783	7.13475	7.20501	6.71382	6.4593	6.68803	6.06375	5.6814	8.24226	6.41755	8.39784	5.46329	3.82801	6.85806	5.44717	10.5894	9.08363	7.74771	5.0191	7.25122	6.67839	5.5389	7.62825	5.37062	7.20395	7.37866
STK17A	1.04e-13	9.62708	10.1644	9.50292	10.7209	8.77355	9.93156	10.8903	9.61584	11.4292	9.9292	9.95426	8.85093	10.8588	9.78642	8.45463	8.61903	9.1005	10.7449	10.0869	10.1101	9.76973	10.1493	10.6016	9.67826	9.28732	10.5226	9.41458	9.35346	11.3776	10.203	10.4153	9.03866	10.8518	10.152	8.34876	10.4755	10.868	9.5267	10.0712	10.7836	9.29983	9.54295	10.9124	10.9046	9.69222	8.85172	10.8205	10.0771
VMP1	1.04e-13	10.3717	12.0618	10.3775	9.47621	9.02955	9.69339	8.95235	9.65794	10.8909	9.19962	9.85193	6.59783	11.1295	8.00244	7.39374	7.2377	10.2991	11.1154	10.2953	9.85716	9.76474	8.55376	11.7915	9.90893	8.62192	11.635	10.1845	9.40124	11.1646	10.442	10.525	10.9987	11.9329	9.84051	7.3619	9.45207	11.2451	7.93623	10.7443	10.1642	9.86343	9.39065	10.4642	9.88291	9.32712	9.90626	10.7988	9.5553
KCNK1	1.07e-13	9.30149	6.2139	10.1652	5.28541	9.81024	8.92103	5.72028	6.65909	4.75879	9.08072	6.30592	9.70925	5.26594	8.86014	9.88054	10.2811	8.89644	5.8281	8.07743	5.89749	6.80668	8.02448	5.87419	9.0813	8.02176	5.82392	10.0053	8.009	8.76164	5.93395	5.04676	6.22759	8.16105	8.35552	10.4125	6.2561	5.27818	8.69796	5.42398	5.93181	8.62438	5.73069	7.72471	8.01153	8.60617	9.22022	5.48511	4.89706
MAP3K6	1.08e-13	7.0865	7.45401	7.00285	6.7292	6.9456	6.60962	6.97984	6.51721	7.53079	6.77537	6.69937	6.38219	8.01983	7.51755	6.22139	6.01054	7.77976	8.27359	7.32489	7.16928	7.28599	7.81617	8.02953	7.17637	6.57393	7.54145	6.37987	7.57313	7.27271	9.30749	6.80489	7.49278	6.73643	7.29399	6.31643	7.37492	6.94167	8.84015	7.71558	7.67499	7.98632	7.3088	6.94752	7.55846	7.21754	8.00259	6.68174	8.10542
ANKS1B	1.08e-13	9.31738	6.53393	10.2135	6.32912	10.8632	8.3908	5.53028	9.01438	6.27869	9.99997	9.24798	9.87761	6.457	9.18429	10.6701	10.8853	9.09859	7.19044	8.60209	6.3593	9.85356	9.08415	7.76863	9.75596	10.0893	5.73043	9.98627	8.64103	9.55314	7.46574	6.41408	8.72542	9.49306	8.97839	10.9892	7.91804	7.87493	7.61531	9.30721	6.90452	9.56713	8.85866	7.78533	8.33599	9.21478	9.70282	7.60097	6.45997
NKAIN2	1.1e-13	8.88219	5.92452	10.478	5.89839	10.4285	7.15125	3.82308	7.75436	5.36294	9.01052	5.83505	8.74792	5.89171	8.92116	10.6828	9.22312	7.5205	6.22306	6.40731	5.07256	8.04231	6.47987	6.53276	8.45425	8.87357	6.23266	8.69581	7.38721	8.74088	6.53294	4.10215	6.82726	5.65602	6.79032	10.0764	7.1639	6.15821	5.88414	5.82545	5.94086	8.77914	6.56351	7.51721	7.45708	8.59054	8.79354	6.0608	6.03759
LYPD8	1.11e-13	6.0221	4.20056	6.09831	4.73438	5.01596	4.2811	5.16965	4.35998	5.77002	5.39915	5.64697	6.10635	6.29917	5.73523	6.59901	6.72341	5.72583	5.57953	6.44017	5.14296	5.01159	6.01033	4.71695	6.06524	6.48282	6.26827	6.17502	5.69496	5.85808	6.50981	5.41922	5.59623	5.96385	5.71136	6.67183	5.6756	5.68642	4.83193	5.88019	4.286	5.96577	4.50832	6.08241	5.0358	5.59278	5.62483	5.40485	5.1589
EPHX4	1.12e-13	7.85963	6.55667	7.81265	7.95017	7.31137	7.67426	7.70861	7.74821	7.3953	8.58489	7.27446	8.92272	7.08136	6.21144	8.20801	10.1692	8.71493	8.21417	6.59175	6.82234	7.12677	7.69851	7.12841	7.48481	7.52637	6.59571	9.48169	7.31049	7.3371	8.06478	6.94833	7.97902	7.76475	8.12322	9.39222	6.33565	7.3594	6.10947	7.07495	6.82293	7.4179	6.58495	7.85348	7.85848	6.6841	7.82563	7.70994	6.2697
BUB1B	1.13e-13	8.99538	9.23538	7.81814	10.0046	6.48489	8.49624	9.76714	9.94627	8.41493	8.95514	7.17586	10.1578	9.21726	7.9928	7.45086	5.7804	8.56228	9.63443	8.24859	9.4025	8.46794	9.49413	8.57413	8.83364	9.17469	9.58119	8.41372	10.1028	9.59344	9.36776	9.8019	10.6201	9.1379	8.8499	6.22964	9.10426	9.35359	7.88468	10.0972	9.75492	9.16765	8.49847	9.97884	8.21392	10.4125	8.30463	8.64264	8.03473
MS4A7	1.13e-13	10.5908	10.9372	11.8854	9.2366	11.5486	9.63774	9.41724	10.0102	8.77341	10.7811	9.15503	8.94338	10.605	11.1082	9.67425	7.40585	10.7677	10.8493	9.76075	9.38164	10.2917	9.73944	10.2212	10.4249	9.97372	9.72732	11.2645	9.87248	10.318	8.36851	9.70957	10.2461	9.17188	9.58216	7.97812	10.4434	10.531	9.94004	10.1152	10.3629	10.2747	10.0885	9.64776	11.3608	10.6531	10.8385	10.5484	10.1942
LOC401220	1.15e-13	6.78902	5.05229	6.44292	2.57966	5.45654	6.64687	4.43732	5.51802	5.76281	4.88293	5.26177	7.86345	5.825	5.7691	6.34658	8.48101	5.26234	6.11193	6.86359	6.5307	6.0849	4.8421	5.0342	6.01273	5.44313	4.47323	7.3604	6.26013	5.95636	4.91221	5.81421	6.07712	5.12693	5.72451	8.1628	2.90019	5.3346	3.32996	4.85036	5.37386	6.38721	4.9135	5.55163	6.05498	5.66617	6.45023	5.96577	3.991
NRGN	1.16e-13	12.4365	8.01867	12.1508	8.48038	10.3219	11.5187	8.36644	8.88152	7.65803	12.1896	8.85682	13.8823	8.59467	9.32316	12.896	14.3072	11.9202	9.84856	11.1051	10.2094	9.53649	11.4362	8.72989	11.6772	9.43646	9.07267	13.6644	11.7902	11.0327	8.43993	8.39536	8.68638	8.19786	12.9361	14.4478	8.69185	10.1208	9.06865	8.34273	9.2349	12.0512	7.2381	6.47256	10.7516	8.18317	11.598	9.74102	7.96821
CSPG4	1.16e-13	7.32857	9.88482	7.98934	9.00129	8.11115	7.09304	8.80781	8.58573	9.08902	8.85656	8.52581	7.4596	9.18569	8.31606	8.35564	6.06149	7.08968	8.52766	7.63215	8.28302	8.94072	9.60849	8.79714	8.6853	8.28495	9.9245	7.18932	8.27122	10.526	8.80989	7.85648	8.2836	9.7858	9.55072	7.1751	8.55828	8.18576	8.09318	10.0321	8.48188	8.44843	7.75087	9.66395	8.36174	8.11464	9.49801	8.37451	6.94125
ATP6V1B2	1.17e-13	12.3957	11.3465	12.4131	11.2653	11.875	12.3736	11.3306	11.6573	11.8509	12.1588	12.0282	12.5166	11.8435	11.9953	12.434	13.0986	12.1071	12.1013	11.8449	10.9053	12.0298	11.9484	11.7546	12.6609	12.0007	12.0133	12.968	11.7631	12.817	10.5056	11.5779	11.5198	12.1912	11.8689	12.7442	11.4664	11.3706	10.2457	12.7442	11.6207	12.0112	12.0459	11.3325	11.7532	11.9393	12.1303	11.5376	12.4529
MKX	1.22e-13	4.74112	4.17207	4.56891	4.55666	4.71923	5.08977	4.47541	4.52839	5.30551	5.12139	4.37624	5.43703	5.03226	6.19868	6.89027	7.19424	5.59366	4.04389	5.95831	2.89097	4.63418	5.02304	4.63703	4.60888	3.85234	4.56296	6.43324	4.41202	4.70684	3.98378	4.64703	5.18413	3.81768	5.34759	6.47701	6.04011	5.50109	5.13226	2.8535	4.29211	4.99383	5.99076	3.65787	4.35299	6.54824	4.8997	6.45788	6.32106
HMGN1	1.23e-13	12.2776	12.2647	11.7803	12.2427	12.103	12.2871	12.7721	13.2634	13.0432	12.7116	12.311	12.8824	12.8454	12.1467	12.1427	10.8093	11.6102	12.5359	12.1771	12.5477	13.3531	12.834	12.8065	13.074	13.3046	12.7832	12.6001	12.6887	13.2009	12.968	12.6643	13.0379	12.6391	13.3531	11.1523	12.968	13.2634	13.6468	13.2175	12.9361	12.5289	12.7552	13.0692	12.2027	13.1448	13.1622	12.5132	12.896
TNFSF9	1.24e-13	7.70994	7.63068	8.29932	7.12624	8.63336	7.86976	6.74545	6.79049	6.85373	7.99082	7.4471	7.9258	7.14454	7.23088	8.39294	8.5015	7.7126	7.24444	7.30584	7.40344	8.03968	7.41708	6.91806	7.72482	7.25317	6.71646	8.15836	7.03871	7.63514	6.47833	7.74002	8.08993	9.39369	7.36615	8.25869	7.12981	7.83522	6.93238	6.96744	7.35678	7.43993	6.89816	6.99833	8.35461	7.37092	7.93919	7.50459	6.90741
[truncated: 1,998 more rows]
[truncated: 52 more columns]
