# Supplementary material for: Abnormal expression of HOXD11 promotes the malignant behavior of glioma cells and leads to poor prognosis of glioma patients
Source: PeerJ. 2021 Feb 8;9:e10820. doi: 10.7717/peerj.10820 (PMC7877241; doi:10.7717/peerj.10820)
Supplement: Supplemental Information 5 [file peerj-09-10820-s005.xlsx]

## Sheet: Figs 1C-anonymised raw data
!Sample_title	normal astrocytes_1	normal astrocytes_2	normal astrocytes_3	glioblastoma cell line_LN018_1	glioblastoma cell line_LN018_2	glioblastoma cell line_LN215_1	glioblastoma cell line_LN215_2	glioblastoma cell line_LN229_1	glioblastoma cell line_LN229_2	glioblastoma cell line_LN319_1	glioblastoma cell line_LN319_2	glioblastoma cell line_BS149_1	glioblastoma cell line_BS149_2
geneNames	GSM397656	GSM397657	GSM397658	GSM397661	GSM397662	GSM397663	GSM397664	GSM397665	GSM397666	GSM397667	GSM397668	GSM397669	GSM397670
A1BG	12.446	14.9642	15.5501	21.9455	24.474	40.3884	32.934	32.5989	34.9801	34.8113	34.9527	42.0828	41.5255
A1BG-AS1	32.6109	29.0493	31.8813	14.7604	15.2094	13.1273	14.1275	16.0803	15.8576	14.7736	15.1445	12.308	13.5469
A1CF	10.0617	8.90808	9.48386	4.35537	4.06032	5.39765	5.10394	5.16211	5.18886	4.86663	4.8989	4.59193	5.0758
A2M	114.999	70.872	225.25	4.36375	4.31286	4.94558	4.4329	228.97	316.028	4.33446	5.93602	126.263	124.462
A2M-AS1	10.5155	9.88227	6.88629	3.88639	3.9289	4.19017	3.82519	6.11071	4.78102	3.74046	4.55321	5.96858	5.03824
A2ML1	15.9464	12.3804	11.4658	4.76114	6.00513	5.6214	5.39647	4.6784	4.98708	4.55635	4.42367	5.60198	5.57392
A2MP1	13.5019	10.4935	10.9339	4.15874	3.40689	4.03611	3.78826	3.52686	3.30879	3.95843	3.76196	3.81579	4.32656
A4GALT	16.2534	14.0122	11.4514	8.64631	8.72144	8.76865	8.42423	7.60938	7.65322	10.1573	9.62276	7.28266	8.45937
A4GNT	6.82382	8.19797	7.66548	3.79702	3.7472	4.15425	4.22458	3.65587	4.44121	4.09337	3.74563	4.22816	3.33311
AA06	13.9828	14.8056	15.6361	8.62987	7.31729	5.96566	7.17982	6.11463	8.14705	8.1971	7.44789	6.92424	7.23712
AAAS	68.1729	67.7765	55.4966	181.482	162.523	139.204	146.683	250.05	276.096	137.202	115.455	95.3493	76.4928
AACS	893.861	839.499	928.444	448.237	482.421	409.103	421.474	245.494	225.055	193.035	197.715	306.191	337.391
AACSP1	10.7719	8.72496	10.1256	5.18561	6.05913	5.28	7.81415	5.09116	5.34889	5.62828	5.87696	5.1142	5.02994
AADAC	38.0891	22.868	16.524	12.0602	9.9747	5.52375	5.48453	4.88986	4.7354	5.66536	5.22579	4.9654	5.28999
AADACL2	11.824	10.1113	10.0403	3.83727	3.66384	4.55841	3.74726	4.35526	5.07345	4.38739	4.09174	4.1144	4.09187
AADACP1	8.41229	7.78307	8.74943	165.573	78.0092	3.17655	3.6999	3.26345	2.95575	3.13388	3.95366	3.2091	3.72596
AADAT	95.4927	101.7	66.0497	37.6766	29.5421	39.976	36.9491	170.845	211.263	26.9089	29.9512	33.0317	34.6794
AAED1	243.967	243.261	276.584	538.722	461.241	553.189	605.16	471.631	404.896	169.386	161.046	760.322	882.666
AAGAB	249.384	213.68	210.734	196.151	200.283	189.339	203.887	122.066	112.297	82.8989	72.1807	104.052	92.8839
AAK1	322.808	309.01	360.837	106.517	105.436	104.305	120.979	103.775	100.903	122.015	121.93	228.506	203.531
AAMDC	485.741	423.506	440.559	96.6556	99.1185	201.853	183.165	264.265	285.901	184.711	172.625	207.885	200.377
AAMP	190.209	196.433	174.037	750.258	662.944	714.5	701.976	706.047	880.851	548.651	499.223	703.427	659.031
AANAT	8.01454	7.289	6.45542	5.71936	5.15535	4.59172	5.20766	5.44584	4.37986	4.89217	5.42299	4.76552	5.53732
AAR2	504.854	458.07	452.477	442.842	508.535	576.47	534.22	555.091	568.579	696.271	709.143	443.004	468.412
AARS	1121.19	979.185	919.21	1877.56	1928.47	1296.05	1225.16	1429.25	1793.02	1253.86	1275.69	1345.05	1294.24
AARS2	124.627	108.717	100.632	92.3361	93.8313	90.7403	105.436	82.9773	99.6663	44.2719	45.7909	37.9813	49.7349
AASDH	176.767	184.323	160.92	211.377	187.165	78.3469	87.5513	128.02	153.438	61.8693	77.7694	90.7672	93.6601
AASDHPPT	1337.61	1404.54	1350.52	949.459	994.267	465.622	469.511	236.865	220.061	514.258	549.918	357.381	340.78
AASS	114.329	114.581	83.7684	95.9474	123.453	65.3278	66.0885	53.8789	74.8785	81.8448	89.2848	61.2198	47.0633
AATF	831.361	775.863	636.788	828.397	791.206	668.587	764.962	833.121	937.36	735.424	727.114	398.932	394.026
AATK	61.4343	64.3111	75.0462	13.1408	12.7261	16.3358	15.4766	17.588	18.3807	15.1012	12.6642	18.0977	13.8716
AB488780	24.0965	34.2438	23.4088	15.3799	14.1369	8.97957	9.02624	7.66994	12.6016	18.5972	16.9441	9.83834	8.6404
ABAT	1171.26	1074.94	1380.43	7.80089	11.2217	43.3242	33.0007	40.9462	42.7612	132.865	149.975	9.63458	6.79408
ABCA1	521.628	640.951	477.237	9.38304	17.6836	33.6657	24.7343	85.2384	83.7207	23.9201	36.2806	137.859	146.8
ABCA11P	69.8222	77.3977	76.3839	52.2191	46.0001	42.7381	47.0632	27.0487	24.1451	25.4871	31.0178	38.6485	37.4025
ABCA12	8.66443	8.76252	10.4582	4.76204	4.8464	4.19902	4.68007	6.3224	6.5303	3.50715	5.33047	5.1263	4.5335
ABCA13	12.4652	11.1546	17.2036	5.17427	4.81208	4.94757	4.16159	20.9435	19.6674	5.52394	5.80613	6.27054	5.98472
ABCA17P	17.6502	22.8211	13.5029	7.65389	7.69823	7.24325	9.56918	17.1916	14.4846	10.2247	8.14561	8.49896	10.8299
ABCA2	11.7458	16.5904	12.465	9.55518	9.74885	11.8322	13.5572	12.2416	12.296	9.97878	10.4192	12.9857	13.3054
ABCA3	38.5715	80.2774	79.8229	12.5021	11.3574	71.6739	71.9101	10.3026	18.0115	34.8152	23.4757	13.4586	7.21999
ABCA4	7.71851	8.00542	7.68398	4.90179	4.28837	4.02936	4.30099	4.03155	3.74008	4.77892	4.40107	4.37635	4.58097
ABCA5	41.986	37.7614	30.6081	26.4649	29.5648	18.0994	19.5484	50.7353	51.613	66.311	57.1462	24.7801	24.556
ABCA6	10.3548	9.59292	10.6639	3.98182	4.47498	4.87989	5.46486	6.40839	8.63608	4.99445	5.4638	4.64105	4.76786
ABCA7	13.3909	17.4324	18.1937	14.7454	19.0316	7.58176	8.13314	8.41321	7.01861	12.5254	12.2845	6.10104	7.64247
ABCA8	58.3668	45.4411	65.1492	4.82764	3.99689	3.96047	4.389	4.71775	4.63606	5.12206	5.20846	4.11843	4.3883
ABCA9	15.1697	12.7574	14.8451	5.68321	5.43507	5.46315	6.21998	5.73076	4.89363	5.25749	5.16672	4.94068	5.59193
ABCB1	17.0933	21.2591	20.2902	89.7822	90.367	7.79188	6.77345	10.2652	11.3684	10.0659	12.4151	6.76823	5.83254
ABCB10	292.674	372.217	359.85	212.738	224.88	280.269	316.429	351.311	282.027	126.271	145.248	334.393	288.013
ABCB11	8.44309	8.43885	8.05311	4.53266	4.35321	4.50157	4.4438	3.76962	4.18086	4.32908	4.22614	4.06771	4.2946
ABCB4	45.0928	49.1355	59.1829	6.93142	6.42014	5.30428	4.04909	21.3957	47.8767	75.2217	60.871	23.3268	33.2638
ABCB5	9.70331	15.4203	10.8117	4.38709	4.49248	4.59852	4.86149	4.90699	4.82925	4.6763	4.75042	17.5502	18.9757
ABCB6	63.5931	76.0132	81.8769	50.5845	70.3684	11.3524	15.7294	91.808	80.7392	52.3743	48.0444	41.9026	39.5027
ABCB7	670.614	564.28	474.467	606.428	473.818	222.542	264.675	257.489	293.637	573.849	572.828	303.932	298.049
ABCB8	13.8826	16.1163	20.2513	15.5004	13.6004	16.0188	12.8667	18.1842	20.6187	16.6738	13.0099	22.24	23.2572
ABCB9	35.8609	40.6378	44.4341	18.1796	21.102	9.64923	9.32628	51.2765	65.5403	13.7755	15.7111	13.3883	13.3329
ABCC1	415.731	473.175	522.677	296.858	267.582	245.951	279.046	109.477	115.695	474.803	454.331	214.419	207.547
ABCC10	295.869	303.052	435.865	247.025	265.553	253.873	234.33	127.271	121.086	132.464	140.316	110.44	119.162
ABCC11	9.48045	8.75256	8.87701	45.5864	71.3114	5.24933	4.97091	5.20963	6.37118	4.83633	4.74218	4.74298	4.82777
ABCC12	6.48679	6.77764	6.41914	3.63293	4.51508	3.80773	3.00613	3.83664	3.05426	3.72175	3.48487	3.43645	3.38441
ABCC13	9.20927	8.00259	8.97028	4.12206	4.66042	4.48454	4.27161	4.88498	4.59196	4.81689	4.89607	4.89799	4.28022
ABCC2	9.72223	10.9252	8.03583	162.401	169.343	5.33148	5.39361	3.99616	5.76333	6.40336	6.09107	8.16446	6.88381
ABCC3	108.141	114.37	122.986	46.8447	46.1883	9.56486	10.3717	26.41	25.4329	34.6054	32.2338	25.6181	26.6472
ABCC4	128.793	118.04	139.964	237.312	250.667	107.164	115.592	84.9586	74.806	408.297	448.622	102.888	116.813
ABCC5	91.2495	73.3	82.8623	23.8572	32.5484	31.7615	29.7938	48.5433	58.1136	24.8434	28.8804	47.1089	43.0038
ABCC6P1	9.63122	9.78718	10.9702	3.9225	3.50854	3.63087	3.69598	3.21792	4.09885	3.48096	4.14348	3.30542	4.72779
ABCC8	10.353	11.1761	11.0953	5.4973	7.25708	5.34897	6.72408	5.78525	6.3823	5.72581	6.02506	5.80779	5.84597
ABCC9	8.74991	8.33056	8.79343	3.99949	4.0548	6.21107	6.44311	4.24412	3.94693	4.29514	4.89665	5.80021	5.23266
ABCD1	23.6959	28.2649	24.2493	19.8544	33.5162	22.3748	22.2841	20.986	20.4598	36.4779	38.629	24.2478	31.8847
ABCD2	9.69184	7.41046	7.68521	3.63436	3.51753	5.12753	3.53469	3.50636	4.71142	4.10778	4.00222	4.18323	4.53576
ABCD3	1579.69	1531.58	1493.73	1265.16	1308.3	680.867	743.257	1009.07	939.316	685.405	745.266	728.565	686.434
ABCD4	288.446	289.021	289.071	155.443	169.75	48.9289	54.6148	82.6894	85.3038	94.7179	106.178	62.0728	38.8295
ABCE1	1459.36	1637.31	1464.6	1892.81	1875.84	863.513	877.484	1205.57	1065.9	628.828	640.106	1139.58	987.048
ABCF1	970.435	910.67	997.116	871.382	981.151	981.609	1008.29	668.36	642.683	853.881	835.925	675.43	656.023
ABCF2	143.756	154.534	154.875	424.886	384.956	297.141	292.001	479.268	491.281	291.9	274.176	570.386	538.135
ABCF3	54.6506	45.6378	56.2178	111.922	141.322	237.674	245.968	94.8297	118.385	143.76	120.084	155.604	151.666
ABCG1	14.1597	15.3759	12.1978	8.11806	10.0035	6.00374	6.03233	10.6279	8.82528	6.31487	5.90859	5.65996	6.09634
ABCG2	16.4078	16.5741	17.8777	165.278	156.656	10.2403	5.83434	51.8122	39.7229	8.76335	12.2034	19.7996	14.52
ABCG4	17.6253	17.7682	18.5017	8.08792	7.1496	8.61302	9.70361	7.17002	7.81627	7.24289	7.87949	7.37099	8.10707
ABCG5	8.94351	8.69744	10.0599	5.85491	5.98811	5.36906	5.82158	4.46593	4.86281	4.87401	5.62561	4.83165	5.5847
ABCG8	9.69483	10.7035	13.1925	6.48918	4.88073	5.94044	5.40076	5.79327	5.17394	5.18128	5.11899	6.10589	6.17496
ABHD1	19.1565	20.456	17.33	6.03118	5.47302	4.78964	4.7416	5.47858	5.45704	4.49053	4.91304	4.81369	4.71424
ABHD10	508.856	498.747	538.228	464.598	450.149	776.116	704.618	371.093	376.778	347.796	315.789	608.386	586.418
ABHD11	30.576	30.9235	24.2087	89.778	96.446	31.5382	35.1529	60.0814	67.2873	88.4936	71.5262	61.0526	67.9519
ABHD12	210.703	183.862	238.437	287.67	285.109	435.963	406.789	480.267	529.602	956.035	950.839	481.882	477.864
ABHD13	122.314	165.763	146.605	17.5092	21.5241	21.4467	22.1836	24.506	23.5441	73.1056	88.035	16.3934	14.2571
ABHD14B	70.9401	91.529	99.6754	222.078	328.345	149.875	140.797	341.863	298.747	119.364	114.992	123.254	143.128
ABHD15	22.1691	29.7665	41.0953	56.2256	64.3045	51.0547	56.872	18.7432	23.9268	16.1335	18.7909	21.7516	22.6959
ABHD16A	320.859	346.51	322.831	179.322	220.755	81.7753	97.0942	100.969	111.401	149.562	142.528	122.704	105.5
ABHD16B	7.05553	7.24745	7.31793	3.98561	4.13292	4.01278	5.01636	4.15036	4.18821	4.22288	4.0222	4.1979	4.19568
ABHD17A	831.681	807.252	943.419	817.303	813.682	1145.03	939.551	756.247	852.922	1026.35	1058.86	597.742	652.067
ABHD17B	594.94	578.175	596.348	182.064	173.748	181.211	185.909	282.594	280.214	116.411	124.253	223.343	235.747
ABHD17C	339.978	302.335	383.795	643.654	565.24	106.776	134.041	132.753	120.795	187.273	191.24	225.87	162.824
ABHD2	247.34	250.764	242.527	91.6727	91.1658	124.107	125.779	196.714	218.875	82.1109	83.6516	95.4387	99.2608
ABHD3	167.779	158.587	133.787	119.725	129.464	234.742	235.7	208.246	167.611	177.631	206.385	199.813	185.365
ABHD4	74.7301	70.9909	98.7701	41.845	36.8266	45.5283	39.7684	21.7134	25.0372	52.2207	50.3169	84.4611	106.564
ABHD5	186.143	149.774	208.531	135.752	132.151	92.7113	102.377	69.0973	73.9527	58.2117	62.0539	50.5842	41.0991
ABHD6	41.9791	35.348	52.5048	57.1859	61.8602	43.0992	39.3568	46.5824	50.2176	22.6488	22.3033	43.0847	43.5809
ABHD8	33.2162	31.1777	33.3588	9.9866	13.807	34.8688	48.0779	15.5376	22.3802	30.1877	26.607	19.7578	19.1487
ABI1	764.846	808.73	876.823	135.453	161.41	400.916	408.126	339.138	301.956	344.064	455.521	350.849	343.791
ABI2	929.37	832.308	893.863	173.543	172.246	104.315	118.123	285.836	288.865	247.85	259.353	212.023	203.385
ABI3	30.6649	30.3335	31.5355	21.2595	9.69761	16.1259	13.117	11.0393	13.4202	16.3326	12.2689	14.4108	17.1399
ABI3BP	14.304	15.5839	26.094	6.16429	5.039	78.1193	75.7194	24.0466	24.6868	5.28938	5.7304	220.262	180.242
ABL1	1164.41	1164.41	1144.11	276.961	299.932	551.072	537.376	324.57	303.247	846.773	834.786	633.706	647.302
ABL2	885.737	745.231	910.207	72.3816	51.3564	397.208	495.06	424.387	359.385	350.811	362.238	315.942	290.656
ABLIM1	415.122	362.632	505.298	6.80435	7.23237	203.005	211.051	15.3157	19.4416	432.656	477.854	25.0013	20.1537
ABLIM2	13.3255	14.7076	13.3268	7.12904	7.15356	6.59109	6.97783	6.85645	6.17816	6.6392	6.88751	6.62787	7.43933
ABLIM3	22.2228	23.042	16.9307	341.482	388.15	208.521	135.589	69.4395	62.7796	58.4706	59.9264	124.101	196.657
ABO	19.3495	18.1915	19.2242	6.53449	7.88627	8.07412	7.19496	6.01745	5.92718	5.87548	6.84274	7.11546	8.21451
ABR	265.367	243.844	256.539	151.615	150.85	301.149	305.517	254.115	250.086	167.234	171.014	242.614	252.504
ABRA	11.6485	8.82377	8.64731	4.33431	4.76409	4.69398	4.99171	4.35694	4.31487	4.23832	4.7434	4.18496	5.30908
ABRACL	1504.2	1459.44	1421.27	272.55	342.538	761.885	732.367	363.317	286.936	803.219	895.18	677.588	608.569
ABT1	77.3617	89.5369	55.851	441.646	525.051	361.168	302.358	228.496	268.59	258.418	208.244	206.354	180.71
ABTB1	13.1904	12.4783	14.8675	7.74893	7.6031	12.7925	9.86291	8.17401	8.62233	7.73143	7.55958	10.8867	10.3683
ABTB2	39.1541	47.3767	47.8832	5.95922	8.03083	15.8231	13.3874	18.5661	24.18	11.4806	12.9746	9.70235	8.39554
AC000111.3	11.3075	13.0626	11.263	5.59458	5.4871	4.98928	6.03001	4.91496	5.65291	5.57916	5.16404	5.5992	4.65596
AC002059.10	19.5052	18.4948	16.9474	6.19869	7.77721	8.40032	6.43912	7.13487	8.42412	7.15828	6.90143	9.03074	6.88967
AC002064.5	7.00314	6.20609	6.45391	3.27898	3.21896	3.62249	3.31738	3.87458	3.19824	3.35769	3.08322	3.09902	3.19483
AC003973.4	8.50506	8.55481	7.05943	3.68811	4.1359	4.39961	3.74693	3.33775	3.5908	3.74161	4.27399	3.45296	3.82496
AC003989.4	9.93792	12.4403	9.26885	5.14168	4.95938	6.62696	6.03442	5.16727	5.13527	5.30701	5.48402	7.24224	7.02833
AC004692.5	82.3027	123.97	71.3274	59.0214	68.242	65.302	73.0135	60.9315	44.7005	59.6899	61.0044	51.2771	56.4724
AC004941.5	175.758	219.606	168.969	82.2791	86.9072	59.5921	63.4232	76.8011	67.4081	53.4592	76.2302	58.187	52.4833
AC005162.4	16.7472	20.8848	19.8452	6.59028	6.20988	8.44812	5.8624	7.67362	6.60075	7.86555	6.70483	7.91545	9.05276
AC005224.2	11.2459	10.9683	13.2106	13.4113	8.89462	7.12591	7.45793	8.65502	11.7098	13.3639	28.019	5.73338	7.92105
AC005256.1	30.8944	25.2462	33.2782	5.15954	6.06867	4.45631	5.95131	5.55981	5.95243	5.47413	5.00108	5.18682	5.45091
AC005306.3	14.4679	14.4579	14.2258	12.3774	8.54144	10.954	9.63012	9.81583	9.23671	10.1679	7.99557	10.1718	9.88201
AC005498.3	14.2972	13.2332	16.5505	6.65453	7.29641	6.7154	5.83557	5.32355	6.94404	7.80469	6.51082	7.73884	7.90827
AC005523.2	253.78	237.024	196.912	11.6449	9.91629	12.0937	11.8207	12.2818	12.0395	7.21213	12.394	5.85626	6.12435
AC005523.3	8.42614	9.29962	9.85772	5.22707	6.24653	8.68815	8.54307	7.32219	7.03405	8.72212	5.88605	7.13642	7.65504
AC005537.2	6.45932	7.65618	6.46542	3.50347	3.89902	3.31595	4.63453	3.20315	3.87616	3.22283	3.40238	3.33319	3.38087
AC005592.3	6.38914	7.0926	5.64891	2.95141	3.36466	2.76085	2.68419	2.64792	2.53621	2.63049	3.3385	2.92034	2.5706
AC005606.14	7.97673	9.30173	8.89087	4.79986	4.95304	3.9549	3.6841	3.85573	3.68177	3.56105	4.268	3.9789	3.82469
AC005785.2	12.8594	11.8567	12.6068	5.97526	4.4938	6.31072	5.03621	5.09339	4.63319	5.24725	6.08759	5.0573	4.93227
AC005838.2	6.88962	8.95946	7.68716	3.10961	2.97601	3.00249	3.20212	3.16403	3.13188	3.00831	2.98024	3.52516	3.55915
AC006026.13	7.69743	7.11149	6.00041	4.53654	3.66389	13.5648	9.01116	3.6664	4.42448	4.95372	7.04215	4.45859	4.89305
AC006129.2	7.69582	7.21474	9.6509	3.76984	3.74502	3.64458	4.15563	3.43454	4.02526	4.5809	3.88312	3.28623	3.18251
AC006538.1	10.8047	7.98949	9.09845	6.61695	6.65168	6.68652	6.74498	8.69973	6.78147	7.65057	7.82257	7.03845	6.14383
AC007292.3	8.54501	9.37182	10.143	4.91751	5.80208	6.4049	7.45148	5.59423	5.57638	5.62204	7.03694	6.09514	5.97214
AC007349.5	8.35592	9.20183	8.03636	4.18525	3.7504	3.64458	4.16625	4.54157	4.46206	4.29634	4.24534	3.90082	4.78711
AC007362.3	9.27288	8.62494	8.25926	4.49151	5.24181	5.1381	4.85106	5.62603	4.67866	6.44516	6.08695	5.34644	5.34539
AC007365.3	21.5048	20.6495	17.1601	10.4454	8.92794	7.77908	7.58666	6.81133	7.06583	6.24584	6.8181	7.68565	8.22036
AC007389.3	10.8873	12.6702	10.6045	4.7875	5.73382	5.0867	4.80551	4.46157	5.46284	5.74371	5.0249	6.2303	6.24233
AC007401.2	9.60985	13.0202	9.02108	4.70429	5.0307	4.93609	3.17948	4.43623	4.72188	4.31995	4.88727	4.01139	4.2536
AC007680.2	7.27818	8.42403	7.98146	3.84484	4.26696	3.81957	4.32973	4.23041	4.68714	3.54362	4.13808	3.717	4.11611
AC007787.2	6.50606	8.93169	5.8406	4.35315	4.12096	3.59602	3.62697	3.55714	4.41711	3.99399	4.14263	3.76429	4.30117
AC008088.4	19.4906	17.5868	13.9774	8.86965	10.239	6.11652	8.92475	5.46793	4.94858	7.02508	7.46516	6.46637	7.36922
AC008746.12	9.44785	8.81254	7.91317	4.27245	4.68817	5.3348	4.51494	3.85425	5.70798	4.21429	3.60037	4.8237	5.11578
AC008753.4	23.8236	26.8574	20.7832	12.5396	13.0934	13.4261	9.53433	10.5436	12.2963	11.3839	10.0743	14.0721	11.6322
AC009120.6	64.8103	54.7093	49.8918	73.3954	77.0237	17.478	20.2099	17.4513	25.445	13.8841	25.3322	8.85934	10.9933
AC009133.15	13.2034	10.388	14.1794	7.62931	6.9002	5.20686	5.50913	5.29464	4.94382	5.4055	5.86366	6.29236	6.16276
AC009502.4	8.56249	8.56016	8.78142	3.94625	3.46989	4.10513	3.44298	4.10078	3.60593	3.42223	3.7556	3.51955	3.58266
AC010145.4	10.5658	12.7093	10.273	4.39434	4.40656	4.09239	5.07066	4.8858	4.05303	4.3815	4.38374	4.25356	5.17784
AC010524.4	7.73306	9.97685	8.85735	4.41434	4.36284	4.96268	4.07812	4.28007	5.21796	4.24825	4.18846	4.17701	4.24639
AC012065.7	23.504	29.3752	28.6117	5.8902	7.64324	6.5447	6.80775	5.36837	6.08204	6.15159	5.45599	5.95008	7.21055
AC012360.6	8.05338	7.31477	7.5346	3.8522	3.88102	4.07134	3.55116	3.70474	4.52765	3.84573	3.94194	4.40885	3.93849
AC012499.1	13.3483	9.82173	8.98689	4.39786	3.39001	3.88311	3.93994	3.42901	3.62537	3.59479	4.96271	3.94982	3.70268
AC012531.25	9.14977	9.01866	10.232	4.18022	3.7822	3.8471	4.23043	4.28912	4.28757	4.50434	4.43774	4.25511	4.79268
AC013463.2	9.11648	11.2286	8.65263	5.38533	4.88609	4.73698	4.21901	4.57107	4.42825	3.89135	4.49375	4.97668	5.04553
AC013733.4	8.18452	7.47914	7.85314	3.50441	4.04679	3.57285	3.99608	4.16932	4.55838	3.58568	3.82074	4.413	3.93156
AC016831.7	16.7699	17.9699	19.4026	7.00022	5.6004	4.64737	4.00708	4.58761	4.96477	5.87245	4.71338	4.6887	3.80701
AC016999.2	14.509	11.7825	11.2453	5.6518	5.98755	5.18691	5.32057	5.06199	5.66277	5.87166	5.61963	5.0651	4.96663
AC017002.2	167.611	137.692	97.9569	19.3855	13.4915	6.23843	5.91803	6.63427	6.81206	6.80815	8.47289	5.07623	7.03148
AC017104.6	19.5023	19.0035	21.8855	7.71088	8.39147	8.72291	9.26631	36.0374	36.3677	8.03235	9.8127	6.92769	9.56598
AC018755.16	118.981	117.417	129.526	20.4061	15.5184	29.5635	29.6638	34.0239	31.3782	42.2482	37.7017	28.4905	31.6648
AC018755.17	10.0171	9.36241	9.27207	4.20098	3.97692	5.63714	4.05277	4.02626	4.89586	4.20392	3.95374	3.59433	4.40629
AC018766.6	8.53453	8.21815	9.38134	4.73693	3.80617	3.95735	3.80983	4.39957	3.63267	4.41263	4.15722	4.05904	4.27689
AC018816.3	13.779	11.3554	18.1607	4.76704	5.02836	7.82231	5.90901	6.44737	5.70855	6.65878	6.88826	5.64501	6.25936
AC024560.2	13.877	12.112	14.1004	4.68359	5.42291	7.07214	6.41447	5.76729	6.11055	5.87809	6.21304	5.36722	5.18409
AC025442.3	11.8403	11.9642	12.0771	6.29924	7.91176	7.14153	6.90863	6.99885	6.47267	6.98633	7.26171	6.48219	6.65607
AC064852.4	8.74258	9.04904	11.0075	4.36064	5.65186	4.39994	4.61597	4.7974	5.00644	4.95831	4.14096	4.71878	4.32147
AC067956.1	7.06575	6.43226	6.11985	3.21577	3.73221	3.08113	3.17572	3.2417	3.12668	3.97445	3.23619	2.99338	3.13498
AC068039.4	17.9874	24.3076	28.6502	4.88201	6.269	3.89522	6.19452	5.01065	4.64709	4.93035	6.55076	4.31417	4.88306
AC068138.1	8.09235	7.74219	6.85909	4.78276	5.10579	4.27291	3.13514	3.67087	3.41272	4.21876	5.12516	3.44883	3.4958
AC068831.3	12.0758	11.9648	11.4055	6.85772	7.75111	6.85889	7.52259	7.20905	7.786	6.18967	7.23376	6.59767	6.95869
AC073283.7	11.5021	12.7437	12.3596	7.02536	6.55825	7.08497	6.42204	5.86861	6.33029	6.49525	7.85525	9.72899	5.48537
AC073321.4	12.4168	11.8839	11.5434	4.35548	5.27944	4.78116	4.94077	5.38726	5.84994	5.23492	4.48778	5.53502	4.14217
AC074212.6	12.5532	12.7494	11.6828	5.42147	7.47182	7.52347	7.56512	6.69398	6.10671	7.24479	6.77701	6.46725	7.47202
AC079305.10	11.9542	12.669	15.2657	8.01968	8.88803	7.27743	6.08578	9.42161	6.94869	9.5096	8.59763	8.84039	9.10204
AC079741.2	8.07054	8.15074	9.41135	3.33246	4.13109	3.65673	3.36967	4.01128	3.66818	3.30548	3.7131	4.11543	4.43448
AC079767.4	8.41144	8.63716	8.81336	3.71696	4.7476	3.95997	3.88698	3.64212	3.79096	4.05363	4.16772	4.56224	4.01758
AC079807.4	8.70334	8.04775	9.94454	4.275	3.63429	3.86834	4.01497	3.50029	4.07524	4.17743	4.77906	4.04473	4.5302
AC083843.1	14.2621	13.9685	15.3766	8.22888	10.9499	7.22808	6.96307	30.775	29.259	11.9545	12.4453	17.0129	10.9249
AC083949.1	18.2893	24.871	18.0967	10.7214	11.3957	7.31097	8.06351	8.02605	7.2213	6.07722	8.40252	8.32077	12.0973
AC084219.3	8.342	8.40725	8.97778	4.61595	4.11841	4.36976	3.93151	3.96626	3.91818	3.93329	4.69338	4.57284	4.64659
AC087501.1	13.0894	10.6009	9.52887	6.43785	8.21789	5.15602	6.41001	7.0373	6.10577	8.52551	8.2423	6.65827	7.71844
AC090627.1	11.6338	9.89272	8.98768	5.0897	5.82147	4.96891	4.6799	4.27553	5.20451	4.07623	4.66952	4.78169	4.65181
AC091133.1	109.732	94.1065	123.404	33.4428	39.998	20.4858	28.7056	48.9698	69.9605	38.7206	42.2934	27.5752	35.6509
AC091633.3	14.1655	13.5557	16.5405	4.38279	4.00569	4.08733	4.86233	4.69255	4.6449	5.1692	5.83617	4.68432	5.73121
AC092192.1	8.65801	8.08093	7.73199	4.12453	4.58367	4.41557	5.59722	4.20047	5.1777	5.31635	4.51889	4.75729	4.63259
AC092620.2	89.4274	70.6807	64.4872	8.83841	9.40789	7.1255	8.14593	7.1854	9.38511	7.16341	7.39141	7.92247	8.80893
AC092660.1	12.9727	13.1038	12.5859	4.5532	4.38161	4.24674	4.35777	4.74641	4.06663	3.85935	5.07966	4.71955	4.52517
AC092667.2	25.2573	23.5793	33.3367	5.01955	5.81925	6.39266	5.31726	4.70023	5.50318	5.58108	5.82582	6.31244	5.49054
AC100830.4	13.3236	9.2118	14.3154	4.62998	5.89891	5.58898	5.39167	6.48709	6.79559	3.97699	5.00206	6.41364	5.3088
AC104667.3	11.6298	13.3109	15.1714	6.89965	6.20578	5.9553	6.026	5.79443	6.10739	7.6792	6.80405	8.65952	6.79881
AC106801.1	8.13661	8.89145	9.2347	4.16115	3.8158	4.52633	4.09277	3.32286	4.41362	4.13707	4.38816	5.04919	4.82913
AC108056.1	6.66807	7.50809	6.61168	3.13271	2.71191	3.15532	3.67314	3.99771	3.38208	3.49897	3.75244	3.15739	3.66828
AC112198.1	11.551	10.789	10.9897	5.08004	4.4761	6.17938	5.71614	5.77262	4.94294	7.92943	9.94993	4.94506	5.557
AC114730.11	10.5655	10.0482	7.74455	6.17864	4.86866	6.07777	5.65407	5.6511	6.00742	5.42363	5.57577	5.76418	5.18512
AC114752.3	9.41633	9.94851	9.1913	4.07869	4.49522	4.71103	4.04305	5.17165	4.34851	4.34269	4.7315	4.53373	4.52868
AC124997.1	11.8089	11.5946	10.8818	4.64238	4.18677	5.13742	4.66627	4.87114	4.74366	6.51214	4.89495	4.21456	4.97693
AC136289.1	13.1891	11.4858	12.5312	8.27486	6.82964	5.85595	6.40471	7.11858	7.13244	5.02131	5.9592	6.33113	6.87955
AC139100.3	7.90801	7.96689	7.88229	4.17104	4.23986	3.46146	4.36323	4.27842	4.15916	4.11759	3.99051	4.63939	4.03476
AC141928.1	11.5232	9.9328	10.2031	5.5748	5.89998	5.56296	5.53263	5.28276	4.83872	5.84943	5.2481	6.12611	5.69573
AC144652.1	37.7468	44.901	23.08	20.0136	20.1784	11.9286	13.2197	10.2545	10.7003	18.6922	12.9904	21.1693	18.0167
AC145343.2	10.0344	11.9417	9.82861	11.4767	14.5249	7.52451	6.63355	6.71122	7.68098	8.93362	6.57015	5.74827	6.70796
ACAA1	645.013	633.234	674.623	431.161	482.44	279.851	294.321	319.902	344.081	270.35	267.407	466.086	445.189
ACAA2	570.693	554.043	452.622	159.519	196.75	294.018	282.312	59.3513	70.4132	354.724	353.43	259.557	245.808
ACACA	457.242	445.294	446.763	250.517	282.525	166.304	168.146	174.393	192.145	232.532	233.38	150.285	162.918
ACACB	25.8839	23.458	21.0088	11.5745	11.6396	11.037	10.682	8.25654	9.77553	9.38676	9.61961	15.7823	15.3079
ACAD10	25.0055	30.4602	28.2116	12.8735	14.1344	10.347	9.79691	11.9507	12.3568	16.109	18.2598	11.7322	12.0298
ACAD8	138.449	177.186	156.675	445.715	444.103	257.991	248.357	172.415	123.573	328.647	293.411	172.741	166.223
ACAD9	221.611	202.013	200.937	325.056	343.474	692.901	777.197	222.141	246.728	311.876	265.041	310.647	312.568
ACADL	14.1688	14.0817	13.9212	4.17725	4.37479	53.9295	49.4941	4.73708	5.04838	4.96855	5.08302	4.53588	4.28863
ACADM	926.083	890.817	907.236	445.073	542.905	408.553	466.316	895.118	546.502	688.004	761.318	719.151	698.262
ACADS	15.4319	18.5899	15.0295	16.5038	20.2913	17.0871	16.027	15.8575	19.6149	13.4112	12.4348	17.5092	19.4791
ACADSB	78.1691	87.3939	106.754	37.6481	38.6677	27.0213	26.5442	47.1232	41.9083	65.4329	79.3769	26.3918	24.5212
ACADVL	1092.35	1081.73	1166.16	817.53	957.356	1022.89	950.342	958.252	1046.24	1079.82	976.488	528.131	491.205
ACAN	22.9204	26.518	14.6286	5.24481	5.63625	5.6065	6.12552	7.79234	8.5799	7.07305	7.30811	285.524	248.402
ACAP1	17.3345	16.819	17.7368	10.6176	10.3546	10.0585	9.95907	8.358	9.27233	10.1065	8.70197	9.32393	9.77429
ACAP2	476.809	513.152	517.134	138.653	162.91	363.889	369.076	200.132	155.426	159.606	206.919	400.426	358.838
ACAP3	45.3914	33.5626	52.4316	61.0711	67.5132	41.5509	36.2194	40.915	40.8007	69.8546	65.1919	112.725	111.216
ACAT1	617.038	588.998	507.565	413.262	400.25	520.016	490.189	81.3425	89.8058	503.159	480.354	373.219	374.917
ACAT2	1442.85	1338.81	1049.94	1187.08	1063.07	932.113	849.65	494.681	495.791	1257.5	1183.22	609.937	593.619
ACBD3	2084.89	2069.03	2117.11	389.341	375.463	565.336	533.812	409.086	395.052	205.572	251.97	837.833	838.801
ACBD4	14.9752	19.714	15.603	8.25184	9.76376	10.2864	9.59227	7.96208	9.32321	11.4296	11.6459	7.14252	7.99554
ACBD5	698.122	767.087	719.488	275.247	270.591	398.177	453.186	365.843	334.68	282.5	329.342	404.173	400.054
ACBD6	750.421	710.824	704.575	208.608	236.835	532.453	582.352	372.545	434.659	659.011	638.04	382.627	405.876
ACCS	21.6034	22.4427	26.3535	8.87955	9.11496	11.6863	9.11727	8.48632	11.6269	10.1189	14.0409	8.49781	10.6612
ACD	170.233	157.969	138.898	676.554	749.595	895.843	950.929	410.127	446.831	412.36	428.68	348.829	359.998
ACE	13.2731	11.6067	11.2371	5.78337	5.3762	5.82431	6.03797	5.29783	5.63759	6.41405	6.43233	6.55588	6.56671
ACE2	10.5233	9.12755	9.64244	4.66014	4.69156	4.65366	4.38488	4.78403	4.49405	4.85463	5.64103	4.32168	4.37724
ACER1	9.73217	11.2437	10.4899	5.41598	5.45325	4.44475	4.65924	4.58702	4.94775	4.94113	4.89333	5.03193	5.44438
ACER3	277.829	266.54	271.045	148.796	147.963	136.34	153.926	107.059	91.1338	192.461	211.647	110.071	102.66
ACHE	10.512	10.0854	10.4552	5.69093	6.72513	6.40481	5.69719	6.1717	5.82994	6.44169	5.9581	7.07477	6.69922
ACIN1	234.893	227.115	221.971	588.199	655.896	435.35	459.093	508.581	445.338	481.588	397.131	626.882	539.141
ACKR1	11.0232	9.69155	13.7852	5.95446	5.64064	5.762	5.29144	13.5041	17.264	4.58655	5.44835	5.42842	4.82194
ACKR2	9.3746	9.71344	9.97398	4.72871	5.12479	5.45817	5.67796	5.66646	5.09569	5.25853	5.87868	5.70193	4.9695
ACKR3	647.595	640.242	688.697	7.16585	5.47557	235.29	217.034	5.51909	5.225	62.9448	72.7483	438.339	367.818
ACKR4	10.542	9.00472	12.2294	5.17314	4.93969	4.76685	5.788	7.48209	13.9976	6.39001	5.24865	5.45483	4.87794
ACLY	1957.61	1949.74	1875.09	1503	1544.12	1453.16	1400.6	838.68	853.139	1126.94	1139.55	1412.84	1349.21
ACMSD	8.86379	15.2185	8.6806	5.53526	4.69889	5.31564	4.98016	4.94216	4.84426	5.17519	5.08096	4.37934	5.03202
ACN9	179.814	198.398	187.825	44.7481	41.8643	10.1028	15.457	63.4034	66.1125	16.1951	24.4228	66.5468	73.6841
ACO1	306.48	267.598	278.868	297.593	289.714	150.052	150.018	98.8579	105.013	92.2081	90.8489	256.108	229.295
ACO2	406.756	421.121	293.72	382.182	419.687	180.223	177.354	542.633	601.076	701.333	798.85	446.575	458.056
ACOT11	14.0983	13.292	12.6837	7.89195	7.89052	8.60777	8.73772	8.55116	8.82499	7.59733	7.30627	8.51565	8.22953
ACOT12	14.3567	15.1853	16.569	3.9668	4.56672	4.40206	3.80778	5.18853	5.08269	5.778	5.91368	4.5794	4.66319
ACOT13	394.598	476.351	608.685	297.283	289.95	201.212	212.155	245.103	301.656	437.357	440.627	328.307	292.099
ACOT4	17.2862	15.5083	13.0894	5.25019	4.59147	35.452	34.9031	4.28549	4.24163	3.43513	4.46412	4.13254	4.52578
ACOT6	10.8717	9.60348	9.00384	4.80312	4.67048	4.90191	4.12335	4.57841	5.25647	4.17015	5.21956	3.86962	4.63394
ACOT7	777.865	677.282	886.504	681.575	745.718	1253.72	1125.88	526.544	562.453	825.211	734.72	884.133	864.234
ACOT8	210.215	178.37	253.79	198.566	227.357	199.626	194.483	163.675	184.836	365.433	376.912	159.097	164.108
ACOT9	2227.32	1923.48	1834.52	472.207	415.862	1328.26	1364.9	437.431	400.957	1701	1634.75	1362.02	1315.05
ACOX1	258.425	252.759	267.493	124.921	108.655	76.4307	79.7973	124.322	135.336	125.143	121.253	71.6262	72.7638
ACOX2	56.0971	66.9522	76.8165	8.44646	6.29583	7.2317	5.51751	137.916	124.913	5.842	7.07846	11.3025	11.3099
ACOX3	309.956	295.391	351.3	60.3828	59.6053	40.5083	47.0304	38.5775	37.3034	27.0471	30.8442	60.0419	71.0292
ACOXL	14.4358	12.0491	13.3314	7.23393	6.2374	6.9546	6.31837	7.23915	6.74107	5.86022	6.35492	5.54379	6.80663
ACP1	1278.15	1272.52	1234.21	1364.25	1446.97	763.84	717.273	1057.52	1112.28	773.702	821.556	1370.72	1300.96
ACP2	333.051	332.217	362.613	439.003	425.374	353.38	318.57	222.494	188.584	295.598	310.625	169.579	234.968
ACP5	9.43534	9.64106	13.0682	6.31388	7.74283	67.0784	60.7473	22.7003	22.6236	20.2763	19.1114	12.1578	12.9804
ACP6	186.025	153.102	166.46	36.5016	31.8651	105.955	100.38	480.236	539.402	138.102	126.835	26.2714	29.2513
ACPP	8.25878	8.22113	7.88877	3.67152	4.14918	3.75429	4.13374	4.75797	4.16059	4.44891	4.17253	4.60197	4.78764
ACPT	19.8045	26.7798	26.7825	8.43397	8.42187	9.42036	7.89261	7.39404	8.80046	8.0839	7.59521	8.70994	9.42724
ACR	20.035	19.1415	18.1382	6.14348	5.44954	5.47262	6.00523	5.85273	5.49917	4.88517	6.61665	6.04939	5.40302
ACRBP	12.296	11.2342	11.8249	5.62789	5.53409	6.10793	5.0938	5.46931	5.30284	5.11852	4.98875	5.42796	5.4332
ACRC	50.6385	119.903	97.7004	20.5456	24.5433	42.1381	44.8509	43.6813	47.5806	35.9118	41.8802	28.0679	29.0064
ACRV1	6.77906	6.35647	6.86137	3.73518	3.70137	3.62861	3.66877	4.02949	3.74007	3.60204	3.842	3.82895	3.79317
ACSBG1	12.2269	16.84	11.9565	4.83538	4.60414	4.85138	5.56327	5.59599	5.38529	4.34791	4.57875	4.45618	5.03146
ACSBG2	8.5822	9.47782	8.74788	4.24027	4.42979	3.92657	4.83914	3.83486	4.27771	4.49354	4.08902	4.26787	5.04351
ACSF2	57.8787	60.5287	59.8798	35.6575	50.6073	46.5167	48.5238	38.7422	41.6415	39.1698	42.9746	61.9989	64.1957
ACSF3	17.1501	20.7992	18.1719	7.69956	7.59635	9.9134	10.2467	10.4664	11.8283	8.7696	8.43043	8.21847	7.42898
ACSL1	379.733	457.299	450.693	131.083	132.544	167.462	166.545	846.594	715.209	620.617	710.851	372.487	344.085
ACSL3	1708.65	1831.23	1590.36	573.845	633.67	242.948	245.756	1397.67	1474	407.176	475.814	643.622	640.407
ACSL4	130.716	167.866	200.176	86.9836	131.046	32.4322	43.4414	29.7972	18.3566	58.4588	65.8529	72.1228	50.7541
ACSL5	17.6881	14.7746	13.6688	194.615	202.814	13.2835	11.6324	6.12012	5.25705	68.0393	52.5589	7.53179	6.55242
ACSL6	10.0015	8.47907	9.2044	3.89631	4.00624	3.84338	4.25952	3.8247	4.33972	4.47229	4.55303	4.06536	4.31626
ACSM1	12.408	9.92074	9.19547	4.45924	3.83686	4.1192	5.03529	4.55427	4.42211	4.46446	4.34501	4.3634	4.81021
ACSM2A	9.75533	9.10987	9.66428	5.41871	5.11505	4.61986	5.31271	5.03249	5.30549	4.78596	4.50789	4.51038	5.11043
ACSM2B	8.52191	7.48257	7.15732	3.57579	3.15963	3.84996	3.41712	3.08481	2.87669	3.54131	3.61652	3.76344	3.40632
ACSM3	6.80417	7.21131	8.36807	5.02766	5.16256	5.01161	5.44694	4.15193	4.05554	4.74153	4.3557	4.28832	4.67734
ACSM5	12.3384	13.4243	20.0239	5.10772	5.65267	4.70037	5.97071	5.20216	5.66886	4.72952	5.34792	5.76832	5.16389
ACSS1	15.7652	18.0119	17.9672	5.72126	5.46744	5.89729	5.50268	13.2696	13.1535	7.05398	6.86448	6.72344	6.53264
ACSS2	383.958	336.331	439.322	185.332	211.761	138.16	135.144	156.324	205.999	209.888	191.4	164.445	202.148
ACSS3	92.6856	89.6641	77.8648	4.5833	5.33514	31.8595	24.1326	7.2906	7.12039	24.2443	23.005	25.9041	24.9317
ACTA1	119.358	198.484	64.7165	6.72056	8.13944	6.86373	6.22034	7.73102	7.49344	8.42253	6.84784	9.25436	6.76804
ACTA2	11696	13706.6	15667.7	31.9066	60.5494	40.3157	40.8318	142.461	128.519	189.284	205.279	1391.29	1254
ACTA2-AS1	13.6171	27.7471	44.2535	3.88195	4.19766	4.78548	3.97353	5.27301	4.38402	4.47246	4.35768	6.18599	5.85823
ACTB	10838.2	10873.8	10974	10664.1	10728	13926.2	14013.8	12150.1	11655.2	15186	15074.6	14243.6	14223.1
ACTC1	2517.22	3278.59	3711.16	15.6682	15.9829	42.4175	55.6554	17.1813	10.5651	11.7659	15.0205	33.4211	45.9199
ACTG2	2895.94	2887.29	2871.24	23.7328	15.9547	6.88088	6.04301	8.25329	6.68903	39.9155	34.5642	565.831	605.333
ACTL10	12.9462	16.1328	19.5527	9.14111	9.05539	25.5474	22.7704	15.325	11.2325	10.4505	10.0297	12.1442	12.4679
ACTL6A	1192.1	1398.64	1301.02	868.008	846.956	1175.43	1140.51	1122.73	900.41	903.453	1114.11	1212.75	1133.03
ACTL6B	15.3645	15.0923	16.0594	4.80349	5.26858	5.71394	5.77916	4.61622	5.31385	5.2889	6.29681	5.10489	5.77937
ACTL7A	11.7259	10.1485	9.41416	5.53721	6.18608	5.50701	5.59113	6.65523	5.52162	5.29336	6.4354	6.99857	5.55036
ACTL7B	10.0213	10.2632	10.5597	5.4849	5.47329	5.63729	7.54144	5.71963	5.5469	5.4571	5.52382	5.90045	5.05714
ACTL8	10.6617	11.4676	10.8573	5.8815	5.64211	5.74778	5.96547	6.25874	6.23023	6.11041	6.58694	6.12037	6.12103
ACTL9	8.61772	9.79957	10.1101	5.13623	3.41689	5.30894	4.98642	4.48812	4.74561	4.52697	4.91897	4.16924	4.34606
ACTN1	3254.76	3511.98	3939.86	1305.33	1440.88	1659.95	1862.05	1668.76	1579.2	1806.99	1812.69	2135.31	2070.34
ACTN2	49.6003	37.0732	33.3268	6.12954	6.73665	8.02681	8.26855	9.198	9.91324	10.1175	8.77575	10.5563	10.3087
ACTN3	9.25727	10.4557	10.2245	4.56511	3.8891	4.68935	4.76651	4.83726	4.30829	4.14931	4.67787	5.66035	4.6188
ACTN4	689.567	870.524	821.148	1319.99	1283.17	2990.73	2871.61	1244.21	1166.62	1436.97	1359.1	1391.43	1246.14
ACTR10	2004.2	2060.32	2095.48	882.553	1004.26	1152.28	1162.91	1192.25	1200.82	1427.94	1528.48	1568.33	1611.01
ACTR1A	882.502	780.978	897.784	749.638	830.115	685.371	593.623	468.475	547.183	686.277	658.519	690.056	673.035
ACTR1B	270.808	231.559	310.136	320.562	315.051	278.793	237.837	346.48	324.963	208.042	170.861	336.242	336.286
ACTR2	2172.65	2423.55	1846.15	1328.58	1393.56	750.096	740.459	1210.14	1158.05	693.743	777.779	1569.38	1468.87
ACTR3	5772.1	5889.5	5754.42	1466.13	1482.7	1671.13	1596.14	2137.92	1957.12	1723.76	1886.73	2881.37	2601.62
ACTR3B	87.0124	96.2956	80.2767	37.5355	32.6344	23.9844	22.6175	62.2931	61.0488	20.6133	23.8945	30.4222	27.8106
ACTR3BP2	8.2062	9.57554	9.87344	4.16442	4.27065	5.15715	4.91762	5.62531	4.92515	4.92669	4.98212	3.45074	4.94217
ACTR3C	14.9921	12.7923	8.85882	4.35041	4.9577	4.64964	4.194	5.23744	4.6457	6.79257	10.0969	7.32657	8.79404
ACTR5	76.8374	82.135	69.6369	90.5188	90.0618	94.2679	86.1908	77.6978	77.0906	140.104	127.499	77.5079	73.0361
ACTR6	389.479	397.976	443.796	373.995	445.004	233.444	256.614	297.788	295.201	188.144	212.065	221.338	224.432
ACTR8	322.302	256.907	261.917	238.64	193.984	92.2095	70.4972	74.5681	87.0386	90.787	106.84	137.276	171.732
ACTRT2	10.003	10.1758	8.79373	3.88552	4.8484	4.87251	4.67156	5.92986	4.49807	4.97316	4.87588	4.09291	4.65594
ACTRT3	34.3332	53.4434	42.1105	3.79317	4.84985	10.7578	9.16146	8.44707	9.6614	4.57325	4.74151	9.814	8.75695
ACVR1	916.546	1146.42	946.345	108.861	123.009	184.552	210.07	328.345	359.462	237.285	266.969	551.329	535.894
ACVR1B	110.346	102.704	98.7573	40.6065	39.0345	22.8135	21.597	38.7889	43.3735	35.7988	36.6249	31.325	30.6224
ACVR1C	10.8551	13.263	10.664	4.74978	4.02882	4.27822	4.12853	5.0475	4.4404	3.62564	4.71672	5.78514	5.247
ACVR2A	229.561	234.257	324.024	41.3084	40.2116	28.197	28.0918	81.7899	78.4223	511.812	620.904	58.5838	63.35
ACVR2B	71.5909	74.6017	56.5405	26.1206	31.5219	19.0984	21.1754	23.4571	30.4633	14.6143	16.7618	13.9531	16.744
ACVR2B-AS1	8.97962	9.51156	9.19789	5.53798	6.08778	7.06566	7.62195	5.27739	7.33006	5.48917	5.85811	5.42643	6.0472
ACVRL1	17.0745	16.6862	15.4409	28.7398	32.2299	5.83451	5.66941	4.94617	5.08155	4.90402	6.16896	5.29012	6.2014
ACY1	7.02964	8.18313	7.86948	5.31861	4.86444	5.34546	5.54927	5.3073	6.77497	5.73198	5.73558	4.73887	5.23633
ACY3	11.9422	9.72457	10.0645	6.97673	5.7349	6.93704	6.62282	5.70982	6.78317	6.59206	6.1418	7.13955	6.22283
ACYP1	758.626	737.51	733.955	880.92	825.629	522.2	459.612	519.275	543.755	907.956	924.626	292.323	315.705
ADA	341.702	345.728	277.873	49.9465	44.9998	64.2605	39.9982	62.7244	83.635	386.405	360.545	71.794	62.6309
ADAD1	9.55222	8.7944	9.21281	3.97001	4.40507	3.95677	3.91548	3.68715	4.01351	3.99942	4.17715	4.00719	4.84605
ADAD2	20.5598	18.3738	15.6437	14.6253	12.6905	11.1622	11.4093	11.9749	14.1843	13.3784	10.1272	12.6333	13.6698
ADAL	26.42	27.276	29.0977	45.4459	40.9194	38.4799	38.6128	32.8123	34.5631	13.2429	14.6774	20.5531	19.7739
ADAM10	1533	1648.14	1709	678.92	672.868	973.278	946.345	1016.12	920.013	1190.01	1219.55	794.713	724.101
ADAM11	10.3065	12.2952	11.9618	6.11525	6.86802	6.51562	7.02108	6.9874	6.30997	6.63632	6.48422	6.4551	6.86578
ADAM12	1171.37	1230.43	1242.63	18.0765	16.3883	152.366	153.504	48.3305	53.8371	893.084	978.203	339.355	353.177
ADAM15	9.61289	11.0458	10.4821	27.6352	36.5157	20.46	24.7077	59.3699	80.3285	17.035	16.301	62.827	63.1009
ADAM17	402.794	422.093	387.524	279.887	339.613	204.196	205.935	263.172	245.537	193.358	208.52	335.13	323.853
ADAM18	9.7182	10.5484	8.73885	4.04667	3.87328	3.77108	3.79236	4.34227	3.73932	4.0563	4.41856	4.29461	3.71498
ADAM19	667.229	651.072	675.164	12.6794	17.2581	26.5962	26.2469	53.0794	59.6437	208.978	178.417	82.4111	67.9069
ADAM2	8.84443	8.33014	8.98931	3.48398	4.23118	3.41522	3.82489	3.96323	5.46371	3.97308	3.91901	3.6282	4.10458
ADAM20	7.84153	7.96303	9.13036	4.53185	5.20903	4.5815	4.01707	4.57443	4.74964	4.52054	4.25336	4.76149	4.99911
ADAM21	12.0929	11.0852	11.8226	5.2582	4.44611	5.5885	5.62124	4.92737	5.305	4.95687	5.86139	5.35122	4.82644
ADAM22	12.2915	13.9571	12.5991	18.3253	14.8754	6.33035	6.22656	11.0455	10.4564	8.21957	8.4857	4.97983	5.22011
ADAM23	92.2724	84.3481	88.7215	5.59095	5.22783	7.01517	10.0012	12.3051	14.0784	8.68564	8.55253	6.99557	5.90903
ADAM28	11.2675	10.0248	10.7539	7.06799	7.45601	6.06655	5.60291	6.13442	6.53204	6.50675	5.87065	6.87263	6.30746
ADAM30	9.58015	9.0188	8.56369	4.8676	5.14994	5.46169	4.84069	4.59027	4.43162	4.28101	4.89281	4.6875	5.1423
ADAM32	16.7062	19.7319	21.6614	4.32803	4.80602	4.86569	5.35347	5.27244	5.02146	7.69387	7.12705	5.24311	5.5117
ADAM33	76.0514	87.5413	78.2494	8.67962	8.85832	8.76832	8.48644	9.9405	8.6059	8.46896	10.6153	42.7051	29.8527
ADAM3A	14.9122	19.7364	12.9605	7.86953	6.51972	10.2579	7.208	6.82111	7.11853	6.01373	5.93197	6.90195	6.91606
ADAM5	8.55861	9.29335	9.36496	4.04322	4.01145	3.83218	3.66756	4.35154	3.5717	4.23316	4.60302	4.59969	4.46301
ADAM6	11.3267	11.5817	10.2928	3.77251	4.52823	4.95509	5.12369	4.22452	5.49709	6.19173	6.56561	4.51046	4.5
ADAM7	8.4971	8.01634	7.98705	4.51161	3.97739	4.05941	3.74526	4.28572	3.96356	4.40795	4.41864	4.33446	4.36792
ADAM8	15.6261	15.7621	14.2958	14.3483	13.0873	9.62356	7.49203	8.77328	8.66543	8.59607	8.80992	8.49803	8.77698
ADAM9	4469.76	4429.22	4589.57	1491.22	1631.59	1084.66	1129.72	1715.23	1531.47	1998.15	2286.23	1908.69	1795.96
ADAMDEC1	7.80581	6.90025	9.0816	4.12501	3.40783	3.5514	4.25421	4.75438	2.98925	3.98384	3.65214	3.81777	4.32216
ADAMTS1	328.81	282.428	357.299	398.806	441.256	1148.03	1200.05	317.044	292.979	338.258	391.667	744.017	648.774
ADAMTS10	93.4328	54.5571	78.666	15.6487	13.2339	16.8288	16.1858	13.3242	15.2373	26.1141	25.5102	15.2243	16.0932
ADAMTS12	2254.48	2041.81	2157.23	41.0476	37.4331	43.8226	53.2505	19.8304	23.9213	36.356	35.5005	323.868	261.709
ADAMTS13	12.7619	15.7795	16.5012	6.24296	6.51632	6.5099	7.80007	8.39875	6.87528	7.9995	7.00897	9.59231	9.70958
ADAMTS14	90.1291	104.369	68.4905	6.73237	7.08506	7.85402	7.17413	8.21801	6.20876	9.91773	12.7005	16.1476	18.829
ADAMTS15	241.377	237.003	290.928	6.32247	5.53512	28.0821	28.7111	34.5396	39.0785	75.4613	80.4061	4.59128	5.29048
ADAMTS16	208.093	169.754	35.8207	4.98007	5.88139	7.01163	6.30032	8.10558	8.88504	50.7374	63.8192	6.63845	5.6239
ADAMTS17	11.4282	11.0842	9.60213	4.30046	4.3263	3.88382	4.69813	12.2288	17.3524	4.52776	4.43285	4.05501	4.82471
ADAMTS18	34.2229	23.0386	19.9104	5.17202	6.32852	5.11036	5.48677	5.56343	4.58231	5.39513	5.54831	5.49444	5.68761
ADAMTS19	11.6219	10.835	11.9992	88.6697	97.5657	4.83254	5.63848	5.67189	5.42713	25.2178	29.4312	5.38492	4.99502
ADAMTS2	343.543	286.793	188.052	5.57217	5.45398	25.5365	21.1454	6.00779	5.22393	142.033	128.509	71.292	67.5526
ADAMTS20	7.71204	8.03596	9.2827	4.37383	4.53317	4.61126	4.43701	5.61278	6.02658	4.47231	4.35946	4.13083	4.27997
ADAMTS3	206.99	219.16	175.989	84.7366	112.553	61.5233	57.8355	78.0979	68.9698	12.0947	13.9972	80.3799	96.953
ADAMTS4	8.11278	12.1068	9.48945	4.54908	4.27915	5.11833	4.09612	4.71854	3.98798	5.06207	4.91902	6.08898	5.66228
ADAMTS5	77.7796	67.2217	152.4	11.609	11.335	15.2908	19.8494	6.61064	6.97354	52.0634	65.6671	40.7374	37.8459
ADAMTS6	302.119	299.076	220.154	24.2015	13.7762	75.8468	76.4709	10.5778	7.79025	23.414	29.7833	14.4826	13.8463
ADAMTS7	14.1052	11.9268	11.1877	5.844	5.3436	5.34543	5.37921	5.6507	5.48275	5.92104	4.97121	5.46578	6.3451
ADAMTS8	10.1769	12.0041	12.4496	6.03139	6.58101	7.59892	6.74197	6.22456	6.17795	6.73465	7.41912	7.39206	6.48935
ADAMTS9	34.3371	22.7628	32.6743	6.77256	7.61862	6.0116	5.91273	9.89291	12.1866	15.0759	15.8051	35.0204	27.4539
ADAMTS9-AS2	9.64904	10.2629	9.56737	4.6512	4.43616	4.71558	4.83262	4.96246	4.87218	5.05367	5.31679	5.33738	5.22911
ADAMTSL1	103.517	109.745	135.059	8.55138	7.90686	19.8957	22.3167	5.55967	5.59327	6.18885	6.95165	62.7516	77.8003
ADAMTSL2	9.44912	9.87316	13.8409	6.09434	6.2665	6.45397	6.2504	7.25133	6.80545	6.43859	6.14515	5.86247	7.40107
ADAMTSL3	15.9536	14.3072	13.8529	4.64027	4.02262	23.238	25.0564	3.89964	4.15163	5.22648	4.04808	4.61904	5.26801
ADAMTSL4	12.81	13.6386	14.2128	7.0923	6.81907	6.92276	7.52793	6.80164	6.19365	5.86537	6.72481	6.51663	7.04664
ADAMTSL5	10.0869	9.74382	11.3306	8.05854	9.87031	9.90081	9.50471	11.0705	8.52546	7.19137	8.43139	7.15906	9.4002
ADAP1	19.5657	21.356	24.8341	14.8772	15.4873	23.5614	22.5155	11.1313	9.83254	10.6889	10.952	14.6749	14.4926
ADAP2	21.3919	20.2071	29.3154	7.43652	8.51282	6.39472	7.52139	6.58685	7.87071	7.22485	7.03931	6.82459	6.91769
ADAR	4183.26	4155.13	3701.11	1399.59	1440.99	2746.14	2887.48	1893.77	2147.86	3489.73	3450.08	2220.57	2420.62
ADARB1	146.468	171.318	119.849	33.2991	26.0447	14.0943	15.2401	88.5981	80.1387	27.7607	21.8676	68.7328	75.5113
ADARB2	12.3072	10.3013	14.6898	5.53158	4.44837	5.38693	5.06378	4.28686	4.18205	4.73254	6.07685	5.26885	6.05613
ADARB2-AS1	7.91546	8.40228	8.40725	3.67935	4.03052	4.02023	4.82604	4.09549	3.75272	3.51027	4.21755	3.88928	3.88774
ADAT1	292.497	295.357	272.417	1057.87	1172.73	365.887	395.753	618.421	623.472	243.309	254.996	230.734	289.239
ADAT2	53.3315	62.4754	39.6488	18.4921	26.4524	13.2337	13.5577	11.4634	8.96793	15.2306	18.9447	13.2178	12.3884
ADAT3	10.0776	9.49543	10.421	12.7521	13.167	16.37	18.634	14.9037	13.7632	19.4273	19.5995	14.8406	14.8438
ADCK1	75.5814	77.1089	81.0028	21.6186	20.2433	31.2025	29.0849	18.5965	26.9577	49.4093	43.4564	24.7591	30.0519
ADCK2	84.3746	81.9578	114.604	85.9428	85.9698	144.375	147.443	138.711	149.912	60.9416	57.7636	120.201	123.618
ADCK3	121.436	125.572	153.268	24.886	26.968	35.5607	31.0207	89.9046	97.1161	23.182	29.3654	41.9563	40.7724
ADCK4	27.7946	21.9966	24.4673	10.7388	11.0116	13.4982	12.7358	12.14	10.7688	11.4403	11.9379	10.3224	9.51425
ADCK5	30.5661	15.994	18.9339	14.8065	13.7377	19.9269	16.7162	10.4651	16.8928	23.3253	15.4548	15.9079	19.8341
ADCY1	12.4155	12.7639	12.0852	6.47909	6.83896	7.51167	6.50546	27.3739	32.12	10.1548	12.5867	53.9903	59.396
ADCY10	11.4884	9.81306	10.7394	5.12934	5.64038	5.07911	4.86406	5.35324	5.12808	4.9107	4.90911	5.21049	4.44458
ADCY10P1	22.7187	20.1601	17.4261	5.33976	4.69276	9.49586	8.20598	9.48521	9.70041	5.13354	5.58578	7.2745	6.75939
ADCY2	44.3266	61.8408	52.9432	4.2728	3.98233	4.56307	4.26003	4.4718	4.33698	9.54075	10.9102	4.14522	4.40666
ADCY3	53.4184	60.4882	47.94	178.212	211.939	177.554	192.646	226.273	196.478	87.8895	101.35	181.681	171.132
ADCY4	25.7627	19.2696	19.5628	7.21029	8.7055	8.80002	7.16539	6.93318	7.37568	7.46808	8.0718	6.73879	6.38235
ADCY5	10.6297	8.26769	10.3858	5.57813	4.54067	5.25269	4.81027	4.68832	4.5432	5.09878	4.86731	5.42516	5.9164
ADCY6	61.6641	49.758	69.921	27.2265	21.1253	38.0376	51.5416	50.555	45.4965	22.5201	20.2754	39.1015	34.9562
ADCY7	125.734	126.917	166.487	80.6327	88.4502	53.2327	50.6093	12.9335	13.1405	74.1081	76.4718	86.1021	64.2495
ADCY8	8.63445	10.0381	15.0686	6.89395	6.0725	7.51986	7.10987	6.01653	5.32037	13.7301	10.5263	5.39966	6.39734
ADCY9	122.142	120.298	143.565	50.5341	49.6522	58.7632	60.5621	63.6513	66.5177	130.262	125.79	74.8294	69.2492
ADCYAP1	7.72753	8.17074	9.34364	3.32262	3.52245	3.74782	3.53358	3.91548	3.8953	3.67328	4.00234	3.9701	3.67134
ADCYAP1R1	11.9569	9.93773	15.5733	4.4867	4.60103	6.06039	4.94464	4.23037	4.86886	4.8101	5.33567	5.19953	5.66458
ADD1	1023.75	1048.75	1147.1	524.597	544.144	642.125	649.243	290.697	359.333	410.173	402.223	543.562	542.461
ADD2	74.7056	72.8343	59.1237	5.17394	5.49415	123.95	139.416	6.49138	7.04193	6.18557	6.09324	6.42846	6.17014
ADD3	2384.19	2370.35	1908.44	545.972	587.888	475.275	489.083	623.852	720.68	739.901	805.029	545.087	555.195
ADD3-AS1	20.7131	19.2354	18.6479	5.51459	5.65348	5.36956	5.26521	5.21813	5.18937	4.85542	5.72828	5.40796	5.66435
ADGB	10.0039	10.6565	9.7031	5.0093	4.66024	4.5281	5.78047	5.4206	4.90901	4.71846	4.84208	4.48476	5.12516
ADH1A	10.3672	10.7458	12.0951	4.5798	4.92537	4.53262	4.47656	4.99949	5.06788	4.43288	3.84696	4.44266	4.4058
ADH1B	9.75594	10.3661	11.9712	5.03137	4.57215	4.21042	4.09655	4.4144	4.8041	4.15732	4.467	4.78183	4.88139
ADH1C	11.9331	11.0478	10.1056	5.22189	6.09401	5.28613	5.73202	5.4235	4.89331	5.71017	5.88655	5.7435	5.88268
ADH4	19.2283	18.7022	16.9833	9.07311	8.84079	10.7333	8.89491	8.99109	8.35734	8.14094	7.74077	9.7901	10.0577
ADH5	3636.22	3516.5	3628.08	961.935	920.127	1018.75	1073.55	1056.86	1053.76	796.096	840.119	1643.78	1570.56
ADH6	9.77166	9.76276	9.44292	4.97105	3.79379	4.5867	4.54791	4.5241	4.46147	4.36624	4.22112	4.40257	3.95361
ADH7	12.8445	9.44326	9.51353	5.07442	5.26139	5.90454	5.00363	5.60763	5.09784	5.60365	4.86196	4.65187	5.18679
ADHFE1	26.2248	28.4933	50.9073	6.70612	9.86337	6.53012	9.93463	7.25849	9.70304	14.523	13.5402	9.44489	7.05386
ADI1	1221.25	1086.02	1328.12	1398.97	1369.25	1153.14	1083.13	1204.89	1338.1	1055.43	1075.25	1218.79	1169.27
ADIG	22.0128	22.1864	30.1978	16.5677	9.11666	11.7851	12.068	10.63	8.73688	9.58342	10.4199	13.0614	13.5077
ADIPOQ	8.95755	6.70258	8.43576	5.30129	4.1444	4.91118	5.84871	4.97104	4.48041	4.75446	4.55489	5.13228	4.06061
ADIPOR1	330.187	296.858	372.134	504.39	492.97	652.675	719.565	899.871	857.583	688.008	667.117	700.561	690.069
ADIPOR2	1025.77	944.127	866.287	704.781	672.243	625.934	652.051	876.624	969.12	505.037	508.064	449.369	450.391
ADIRF	14.2611	13.3051	19.2138	7.44478	9.12242	8.44262	8.68627	7.04214	10.1571	40.9792	52.8242	7.31087	9.17277
ADIRF-AS1	9.5744	9.21229	12.5453	9.76409	12.0458	11.8857	9.54921	28.2161	28.6253	13.1894	11.9707	6.82098	4.57679
ADK	513.438	495.063	492.978	593.307	528.773	450.183	474.309	750.382	759.009	849.391	851.32	523.569	489.564
ADM	4328.53	3978.13	4927.21	2849.27	2308.83	815.599	821.22	1210.67	1109.29	2762.72	3050.12	4665.91	4315.91
ADM2	14.1848	15.8619	17.8529	5.47843	8.2686	7.65057	8.34516	7.78448	6.74268	7.07242	8.54232	9.63391	8.46591
ADM5	12.2263	13.779	11.1071	21.6301	25.971	8.02001	8.92216	13.6613	18.3502	8.35574	8.39162	9.52479	7.38832
ADNP	1458.24	1351.36	1340.67	506.618	606.18	539.879	574.048	671.395	621.375	659.385	708.333	743.364	694.04
ADNP2	670.901	594.517	536.576	225.424	202.458	387	356.351	288.25	284.46	386.409	402.173	237.449	249.726
ADO	868.606	885.246	811.237	307.812	292.01	298.553	287.132	562.047	486.137	431.31	479.023	440.963	382.276
ADORA1	18.7455	18.3133	19.7477	12.1622	10.1767	14.3406	13.2859	14.4348	12.765	14.2209	11.0957	68.7752	63.6768
ADORA2A-AS1	8.36656	9.84384	8.7113	3.44646	3.78856	4.3142	4.50285	4.3805	4.09139	4.11813	4.24326	5.13572	4.29468
ADORA2B	155.385	135.913	156.372	1396.59	1205.08	359.103	352.42	1049.63	1183.71	2204.9	2319.94	179.108	157.272
ADORA3	18.3495	11.3253	10.2427	4.79146	4.02887	4.1252	4.33202	4.37478	4.50453	4.48599	4.54423	4.25138	4.60988
ADPGK	178.863	198.241	179.656	385.818	413.125	699.021	706.169	445.439	448.526	237.535	190.823	601.877	581.095
ADPRH	13.0066	11.3887	17.7798	4.65039	4.58	8.13836	7.15764	4.69797	5.47998	11.3973	11.79	7.50897	8.13196
ADPRHL1	14.0354	14.9715	16.6169	6.14916	6.25568	7.05306	6.56674	5.70371	5.26044	7.94382	8.67003	5.92047	6.69551
ADPRHL2	1520.26	1452.51	1754.66	845.331	753.308	756.032	742.115	480.525	462.249	539.714	484.772	557.724	569.003
ADPRM	170.113	178.247	227.268	88.1851	74.237	100.707	87.7211	60.3676	60.4992	144.005	151.369	46.0088	46.2198
ADRA1A	11.7279	10.257	9.81327	5.28375	4.91331	4.80302	5.26777	5.05541	5.27471	4.93302	5.13259	4.91028	4.82998
ADRA1B	6.56034	6.5037	6.35469	4.22062	5.13628	5.62257	5.38128	5.20911	4.66251	6.95972	4.95709	4.56624	4.42248
ADRA1D	11.0932	11.3115	13.3438	8.22278	9.87329	7.00136	6.56832	5.33878	5.24409	48.1074	35.5807	7.52027	7.12485
ADRA2A	8.41587	11.223	15.5683	4.86078	5.07602	6.59845	7.85799	5.13263	5.22267	5.86341	7.06667	28.6559	18.9166
ADRA2B	11.0858	10.8851	11.7779	4.99197	6.42299	7.02082	6.13978	6.57262	5.43877	6.24264	5.73334	6.31737	6.13846
ADRA2C	30.9514	34.3141	33.8611	19.0336	20.1159	13.3163	17.0704	14.288	12.6964	15.6843	13.5871	22.1617	19.4987
ADRB1	9.18494	8.01545	7.07448	9.92701	15.5301	4.7633	4.62251	4.7183	5.06468	151.553	159.252	4.26393	4.59833
ADRB2	34.9934	40.4086	69.8809	46.0717	31.0359	184.937	232.81	7.10236	10.541	40.4948	49.5118	4.97653	5.17507
ADRB3	9.98177	9.47589	9.90611	4.76986	5.28582	5.22786	6.04526	5.48709	5.7483	5.46068	5.78701	5.62196	5.70947
ADRBK1	14.2664	16.2644	17.1872	36.6469	43.2308	36.512	37.4405	31.1664	34.6385	38.6281	25.1817	22.9362	23.0303
ADRBK2	65.3738	56.8693	82.7578	11.2419	12.1092	14.3926	12.3231	6.26414	5.76527	13.177	16.3169	12.6724	10.8067
ADRM1	226.468	273.738	278.282	1635.57	1801.16	1647.11	1585.76	1483.03	1564.89	1738.85	1485.47	1416.19	1264.44
ADSL	2121.16	1879.69	1683.11	1960.21	1976.66	531.066	567.58	2332.17	2343.27	1883.98	2041.13	1001.58	974.16
ADSS	331.612	369.671	381.387	230.645	234.476	263.984	283.887	457.411	281.344	389.231	417.244	316.881	290.219
ADSSL1	24.5037	24.7712	26.001	26.0602	37.4	9.32114	11.493	10.2808	10.7449	10.5681	10.813	12.1962	13.6437
ADTRP	24.7732	20.8442	21.9833	16.5389	24.6555	6.97593	6.28758	5.9103	5.01251	5.07437	5.4359	7.88637	8.25186
AEBP1	684.018	738.956	446.995	11.5605	9.6429	10.4845	9.83814	9.37936	8.87237	10.4664	11.4885	28.3558	24.1421
AEBP2	528.452	748.948	539.604	197.267	194.302	151.658	154.374	365.858	252.158	260.874	330.475	204.943	215.678
AEN	338.559	381.91	347.55	124.475	99.3971	186.502	158.326	149.198	150.006	125.907	108.584	42.0939	49.2298
AES	174.266	186.321	211.912	397.112	376.184	684.065	637.26	372.34	490.583	655.485	679.458	493.932	504.709
AF001548.5	13.8436	11.3243	19.1495	6.08994	5.53629	10.0219	6.85946	5.02606	5.2639	7.68286	7.19158	5.18112	5.07788
AF007147	25.9651	36.2215	49.1736	6.52483	8.68347	8.25638	7.504	8.55244	6.97706	6.2309	7.59191	8.41671	6.9215
AF067845.1	8.3083	7.86129	7.76194	3.82127	4.12028	4.05049	4.32976	4.42328	4.00815	4.47191	4.12383	3.91277	4.78136
AF070581	702.856	934.288	631.805	15.3069	16.1908	57.9409	60.4084	34.4777	23.6287	34.0252	40.6787	30.925	30.7226
AF086184	10.6255	15.7805	14.8802	5.03806	4.62968	7.98592	6.29605	8.7171	5.50834	15.752	12.529	4.9951	6.02135
AF090939	19.4815	30.1363	26.6177	6.04731	5.67634	6.08907	7.20132	6.82782	5.5897	6.15327	6.03578	4.50986	5.7322
AF131215.4	11.2233	11.8787	14.9412	4.02223	3.31123	3.36647	4.43914	4.24397	5.23873	4.03575	4.63229	3.5898	3.86594
AF131215.8	56.4678	55.2033	43.7188	5.10817	4.06273	7.44684	8.60098	5.00191	5.63713	6.75964	10.0092	10.8584	9.40917
AF186192.1	19.2255	17.488	20.893	7.43676	6.67105	7.94736	8.80138	8.97076	8.04007	8.45574	8.24132	8.97836	9.466
AF198444	10.558	10.3006	10.9945	7.05237	5.72515	5.36646	5.89316	23.2404	23.3411	22.3693	120.703	7.33461	5.22462
AF213884.2	13.5504	12.0365	12.154	5.78406	5.10088	9.34676	5.3517	5.56731	5.86504	5.69108	5.78271	6.5592	6.94192
AF279780	11.5284	15.6455	16.4859	6.37855	6.82941	5.69835	6.69322	6.02987	7.37964	5.84305	5.14233	6.12701	6.32224
AF289551	21.3673	18.6371	17.0652	7.74356	6.28013	7.51657	5.2017	7.15989	5.2523	5.3589	6.14254	5.56041	6.47524
AF520793	88.1691	56.0971	129.468	4.0755	5.11631	4.56648	5.18122	12.9517	16.2593	6.62129	7.94917	11.0951	10.2003
AFAP1	88.1204	106.793	122.485	5.27216	4.34406	10.4776	11.0316	7.99195	6.53989	5.99965	7.06259	7.96947	9.67784
AFAP1-AS1	7.59643	7.99445	7.49626	3.33453	4.24468	3.5676	4.27109	4.41631	3.77431	4.44797	4.27022	4.28212	3.61004
AFAP1L1	55.9132	44.6134	47.2468	63.4948	54.4638	33.5859	38.7682	104.629	88.5252	9.75336	10.0365	10.7218	9.66995
AFAP1L2	29.3709	29.1106	19.455	22.2636	38.4086	6.49204	5.19898	103.862	121.137	8.66746	8.68671	8.67924	8.51289
AFF1	617.714	592.442	630.679	174.735	160.325	336.417	366.878	107.141	115.086	43.976	44.9751	200.936	173.177
AFF2	24.5327	22.443	18.5017	3.63862	4.01691	3.67127	3.62286	4.18925	4.43928	4.16638	4.51012	6.21125	6.82583
AFF3	79.4308	69.021	83.602	4.15616	4.32645	4.15791	4.34294	5.96409	5.39933	4.45371	4.641	5.00889	5.37766
AFF4	744.172	784.281	757.128	164.066	184.079	186.568	207.188	195.322	198.029	208.13	251.745	179.676	181.986
AFG3L1P	86.9885	88.357	78.7931	233.713	218.091	101.636	91.4434	183.342	164.311	81.6773	84.342	59.4513	55.5315
AFG3L2	1906.77	2003.11	1712.72	1083.54	1069.49	718.643	739.831	340.471	322.264	440.673	510.691	497.209	472.071
AFM	7.05091	6.73903	6.50724	3.54092	3.884	3.72582	3.41746	4.29416	4.58253	4.27233	4.40387	3.45346	4.7581
AFMID	14.1617	14.1318	13.5567	33.7908	23.5919	12.7751	10.8872	19.9671	16.5712	18.6802	12.2092	9.9544	11.1094
AFP	29.4175	24.1717	34.2905	7.85582	7.95849	25.5384	33.6906	5.98857	8.00265	46.3752	55.1501	30.6514	31.6731
AFTPH	209.966	201.915	210.835	227.223	224.972	187.63	161.202	260.118	308.297	140.636	140.854	129.047	140.186
AGA	247.523	247.8	312.018	545.462	563.619	223.628	219.619	743.849	796.418	337.97	333.832	292.292	292.448
AGAP1	117.952	122.243	119.908	56.277	58.5674	76.29	86.3634	72.5951	66.0423	51.8716	64.5604	67.8515	69.5661
AGAP11	10.4173	9.00717	7.0996	7.08247	5.8211	6.01846	6.68381	5.57659	6.47267	6.44501	8.24779	6.47296	6.07001
AGAP2	11.8735	12.557	11.0036	6.61597	6.27812	6.43523	6.16493	6.40479	6.5175	6.45129	6.3211	6.16493	6.35181
AGAP2-AS1	13.2185	26.3411	14.1045	146.099	148.927	103.021	94.0714	160.445	183.421	59.6402	52.8744	85.0001	89.4563
AGAP3	166.279	159.378	161.762	35.0661	44.789	33.9964	38.2118	64.4908	69.9386	30.9845	22.0534	69.7234	69.9823
AGAP4	72.7255	140.645	66.407	6.9681	6.23508	5.7049	4.49058	5.99232	6.33449	6.09109	6.07009	5.61491	5.68704
AGAP6	15.6714	20.3483	21.4628	16.9647	14.4729	12.4633	10.2013	13.2887	12.1446	12.3137	11.7339	8.34352	9.59277
AGAP9	40.3047	40.3627	42.2724	9.91587	7.3698	6.33646	5.70165	9.73243	7.31542	6.87561	5.68193	7.09945	7.58019
AGBL1	10.3499	8.59823	9.14179	3.60353	3.5225	3.8237	3.94968	3.84719	4.25564	4.7143	3.54889	4.87425	4.87027
AGBL2	10.9949	11.2243	10.7694	7.37018	7.23815	4.10404	4.13327	4.49148	5.8744	6.37139	4.92438	4.51409	4.61854
AGBL3	18.2369	15.6724	14.5738	5.38518	5.18981	6.44406	5.49307	10.2874	9.42057	5.42101	5.77346	5.80177	5.29477
AGBL4	9.84456	9.58477	9.00019	4.79018	5.44047	4.642	5.55206	5.00108	5.97709	4.74776	5.50997	5.46328	4.6051
AGBL5	132.719	134.253	151.238	118.325	122.345	66.184	70.3919	152.51	171.851	61.841	62.4679	81.1493	72.8162
AGER	13.319	12.747	12.701	5.83074	7.88629	5.19123	6.59704	7.87829	7.22997	6.39669	6.24462	5.94031	6.12918
AGFG1	497.785	464.223	455.819	173.463	180.981	195.325	181.363	233.8	229.44	253.448	290.133	247.042	237.856
AGFG2	14.3205	17.5237	14.6748	10.1823	10.715	11.8135	12.1716	9.29912	8.16078	8.79422	8.16777	11.3177	11.3231
AGGF1	402.178	386.659	390.727	266.687	285.464	220.288	243.449	283.952	302.961	278.494	317.576	174.952	181.934
AGK	318.512	283.61	273.894	157.631	149.783	129.17	116.711	224.487	206.89	226.988	185.289	189.034	190.301
AGL	1233.34	1359.71	1674.1	409.657	489.951	486.019	544.716	568.899	531.836	488.737	682.221	533.109	551.374
AGMAT	30.3662	22.9172	27.7517	55.2505	46.579	11.5463	11.8928	6.38981	6.65322	5.61901	5.44559	37.8466	44.9073
AGO1	228.703	226.041	229.857	90.0116	84.7935	49.2611	49.7563	85.5319	93.8988	75.9178	64.7665	90.621	85.8936
AGO2	151.742	148.222	128.559	269.11	236.284	202.218	257.371	137.274	118.802	97.2592	198.293	120.558	176.772
AGO3	189.966	196.901	198.809	81.8925	81.352	45.3714	47.9919	38.2172	53.2064	31.0556	34.7506	40.7845	39.4402
AGO4	69.4302	79.4511	84.8849	31.6694	34.5175	40.4772	45.7209	42.4045	35.5199	40.6653	46.6557	50.7276	44.6425
AGPAT1	276.798	330.856	326.34	322.455	319.418	223.363	246.765	306.666	364.246	224.79	193.995	169.449	179.84
AGPAT2	42.7867	38.243	47.0944	54.6582	51.7224	172.133	143.73	80.8579	97.2692	53.6513	55.3477	76.5523	71.5375
AGPAT3	391.182	364.647	437.228	89.3686	93.3608	189.968	192.274	188.903	197.883	60.2134	55.2292	142.101	149.712
AGPAT4	358.631	332.613	214.216	6.0587	8.42109	25.0812	23.2985	7.23718	7.1303	27.8128	36.4612	81.3588	70.0875
AGPAT4-IT1	32.6565	26.2051	17.7607	6.77797	8.20986	6.83952	9.25824	5.17918	5.87817	9.71833	6.86606	15.0174	16.5727
AGPAT5	1251.96	1174.46	1025	392.342	344.097	303.897	292.204	495.379	406.425	521.086	588.772	455.747	423.066
AGPAT6	327.567	311.196	332.757	115.924	116.594	104.205	118.487	97.0458	119.633	204.669	161.499	180.898	185.218
AGPAT9	190.174	133.856	209.415	272.912	243.231	58.0746	47.2789	2164.94	1609.85	381.088	452.934	78.7933	62.0656
AGPS	668.199	675.014	657.568	337.865	322.504	242.902	257.208	368.223	304.738	645.224	669.522	335.536	310.12
AGR2	8.94627	8.72232	8.25734	4.80761	5.37229	4.94343	5.06354	5.63458	5.85786	5.9211	5.10596	5.10886	5.17364
AGR3	9.53068	10.3634	10.4489	5.78553	4.81314	5.78139	5.05459	4.3808	4.73832	4.71636	5.90215	5.59895	4.80823
AGRN	132.433	135.459	105.097	110.327	110.939	252.468	288.006	71.027	59.6454	215.256	187.273	117.62	131.91
AGRP	5.3646	6.39968	6.6824	3.6073	3.85198	4.14942	4.23356	4.36371	3.85698	3.57122	3.74784	3.84372	4.52432
AGT	30.3072	21.5657	19.3305	7.70104	10.7459	14.5992	24.2679	9.74423	7.65198	134.52	143.96	528.153	566.897
AGTPBP1	199.91	225.206	214.698	59.4313	45.7459	189.833	188.288	105.423	106.819	65.9768	101.081	151.784	157.833
AGTR1	57.2874	46.8091	40.0651	5.52827	4.76972	5.38515	5.92947	5.48314	5.35043	5.23102	5.36149	330.804	335.967
AGTR2	9.45441	9.37246	10.5758	4.97982	4.86972	4.83323	4.4984	4.74041	4.9358	4.36977	4.56515	4.44484	4.51628
AGTRAP	76.6285	78.1062	86.7843	150.383	171.128	301.387	294.745	96.9581	108.954	139.4	117.747	286.983	287.675
AGXT	8.53782	8.68285	9.06236	4.64547	4.62997	4.6171	4.3896	4.41757	4.72966	4.81662	4.19641	4.46927	4.24157
AGXT2	8.63877	10.7427	12.0254	4.99238	4.07312	3.98443	4.31629	3.94263	4.30225	3.33325	3.92357	4.06965	5.43865
AHCTF1	456.099	518.223	417.73	327.823	352.17	356.483	361.872	465.7	461.171	394.792	466.593	451.937	409.014
AHCY	1461.33	1409.27	1352.92	1668.81	1586.95	1833.18	1670.02	1996.48	1848.86	1907.1	1766.28	1420.41	1460.21
AHCYL1	883.739	852.86	859.167	541.896	610.122	594.072	613.426	787.771	804.758	793.9	879.579	1431.61	1425.79
AHCYL2	101.752	110.61	136.38	21.2935	24.3735	18.253	17.8646	25.4501	25.7083	23.34	22.1247	24.9598	25.8163
AHDC1	12.147	13.5301	11.5805	27.5515	29.6085	18.3143	18.5128	16.9413	19.0543	12.7543	12.7831	77.8791	80.5777
AHI1	238.593	227.409	183.674	23.164	26.4436	46.6455	46.8951	20.9829	24.1575	91.4759	97.906	43.2009	37.9304
AHNAK	540.173	573.2	665.959	375.623	325.896	305.94	377.097	251.599	260.133	232.581	207.472	313.314	341.231
AHNAK2	649.351	639.821	773.606	6.33661	6.56022	422.607	421.584	65.9909	82.7791	100.27	84.1849	131.931	147.866
AHR	1623.64	1842.16	1958.62	639.857	929.471	7.91668	22.8045	1091.27	931.645	461.46	560.904	1225.05	1040.09
AHRR	318.754	386	341.726	178.612	163.521	25.118	17.3518	600.568	585.177	769.427	767.136	208.946	208.98
AHSA1	1378.36	1240.98	1263.46	2454.41	2435.5	1597.87	1633.8	1597.73	1607.59	932.381	898.431	1075.9	1046.35
AHSA2	167.383	163.649	153.233	106.207	124.313	60.3114	63.3593	188.937	166.451	77.5055	76.4688	72.9632	63.9453
AHSG	13.3384	10.6592	14.3947	5.9356	5.4376	5.72975	5.70998	5.49009	5.64449	5.72685	6.32204	5.30675	5.48955
AHSP	11.2056	10.8268	10.759	8.68663	7.45811	6.84591	7.29632	7.52595	7.35	8.44402	6.80159	7.87161	6.83664
AICDA	8.10034	6.67361	7.51592	3.59021	3.68765	3.65041	3.55198	3.55722	3.34588	3.59738	3.99141	3.82483	3.93457
AIDA	4218.68	4329.1	3873.19	1102.86	1109.78	1721.86	1655.86	1561.25	1322.83	899.924	899.465	2633.75	2640.46
AIF1	31.2588	45.2248	37.0486	6.18156	5.95822	6.28836	6.59936	6.90828	6.0772	6.14828	6.14887	6.63855	6.52091
AIF1L	109.101	109.112	114.899	9.90538	9.35176	23.5004	28.3145	169.403	160.761	5.13405	6.69992	8.47241	6.22811
AIFM1	628.304	631.098	416.51	943.947	898.974	604.399	610.315	556.177	563.499	868.389	733.051	668.535	645.755
AIFM2	85.9788	91.547	100.107	162.821	132.485	234.739	272.221	193.303	207.447	141.931	134.98	123.413	113.718
AIFM3	11.2159	11.0177	12.4582	6.87352	4.99092	11.8675	12.0472	4.57861	6.18002	6.56905	5.15811	7.97958	6.56125
AIG1	445.09	454.999	590.17	83.5108	99.8724	140.855	149.634	37.1467	35.4652	172.045	202.643	253.847	251.529
AIM1	21.4786	26.6032	44.3961	226.511	221.175	185.893	217.812	6.6018	9.99543	155.514	178.919	250.614	242.618
AIM1L	14.926	17.3476	12.6006	10.5715	9.48028	11.9508	13.2902	9.72532	10.8287	9.03517	8.55447	9.19426	9.84607
AIM2	20.7852	19.7093	25.6851	17.583	15.2192	7.103	5.53789	15.8823	21.4185	9.75305	11.2551	75.2449	72.8036
AIMP1	798.828	833.063	831.046	747.648	751.024	831.617	816.925	846.832	778.128	545.837	528.176	792.096	767.022
AIMP2	1247.77	1240.07	1161.8	1278.28	1185.83	1553.07	1553.55	1039.27	1080.32	1624.59	1621.96	1084.65	1152.81
AIP	318.988	323.293	290.021	410.188	441.462	354.776	310.543	546.309	621.054	429.074	394.275	151.454	168.708
AIPL1	10.2671	8.40385	10.3513	5.07944	4.12307	4.59535	4.9474	4.68348	4.86843	4.92249	4.70226	4.9277	4.74513
AIRE	13.0592	16.7054	12.5066	12.0046	11.6282	11.1268	10.3231	11.5075	10.068	11.9424	12.3168	13.18	15.5095
AJAP1	19.4518	15.7982	15.1633	4.26264	3.69711	4.03509	4.13655	4.05609	4.22227	4.13394	4.03901	3.81149	4.04708
AJUBA	1074.94	1095	1116.89	1182.77	1075.83	848.183	904.365	322.435	196.256	345.33	408.571	426.613	416.043
AK000798	14.967	16.0953	15.7458	3.93016	4.48283	4.72078	4.90209	5.26907	5.74612	5.74278	5.72052	6.13674	4.82848
AK021537	89.8827	80.9106	110.123	12.1822	13.0903	10.8938	12.4122	9.45337	10.3456	9.38618	9.51529	12.5296	12.0492
AK021804	4429.68	4179.52	3621.47	257.244	212.894	321.941	363.236	194.431	178.655	414.833	445.027	350.86	295.698
AK021933	26.1716	24.7163	27.4883	18.8285	17.5092	15.3508	15.226	11.1903	10.9219	9.85201	9.90426	10.2735	10.61
AK021977	78.7408	66.3942	68.3707	4.81075	5.19951	6.36996	5.96573	9.45269	8.42302	26.9893	38.6384	7.61875	4.57394
AK024936	9.99277	8.51626	9.4446	4.68213	4.9163	5.96856	4.54563	4.10982	3.9998	5.79684	4.77778	4.44698	3.98435
AK025288	794.023	657.415	944.548	94.8481	83.8798	89.4897	102.894	27.2118	30.0113	76.5801	82.6728	42.9272	25.1887
AK026905	50.1711	34.5723	41.4138	18.2298	17.0867	8.42569	8.35821	5.03724	6.22895	7.3656	6.34961	9.8195	7.68686
AK054988	13.8236	14.0371	13.9578	7.07316	6.32469	5.64553	5.28069	5.70552	5.94965	6.31271	6.71838	6.55627	6.26272
AK055458	13.2151	12.497	12.3116	4.97244	4.55053	4.73469	5.45458	5.57943	4.5934	4.83435	5.01779	5.45924	4.56109
AK055981	26.0946	30.5526	30.6368	5.9811	6.17392	9.90529	7.16453	7.79915	9.04739	7.93392	7.27944	29.1389	33.6945
AK056098	29.9548	22.244	23.8736	9.2909	7.26341	10.7257	11.1294	45.5606	46.863	15.5852	12.7503	10.0869	11.6287
AK056982	12.2802	9.9014	11.5729	4.54538	4.42005	3.86631	4.48121	5.5248	4.5239	6.15933	4.93706	6.04204	9.01121
AK074476	19.2509	16.7238	18.4601	6.4498	6.29585	4.92422	5.22166	7.83924	9.39728	9.37081	7.66092	6.63982	6.73496
AK090844	82.7026	62.7334	67.9991	38.3294	47.6256	32.5683	31.9651	33.7388	34.5954	30.895	31.7885	25.9981	27.9465
AK091729	11.807	13.4524	12.9136	7.3098	7.20568	6.53903	6.91967	12.3315	8.29612	6.60399	8.52251	7.24027	7.72204
AK093205	10.9774	9.99314	12.5255	5.22331	5.39108	6.38691	5.46989	4.97348	5.24733	4.95514	5.55158	6.40643	5.24441
AK094644	12.2079	13.7309	9.2762	5.55019	5.66052	6.61372	4.90733	4.65339	5.50512	6.08144	4.73853	4.89453	5.15086
AK096159	15.8533	16.0592	16.5118	6.81114	5.50244	12.2322	8.78372	7.26005	6.13293	4.3384	6.12845	3.87725	4.22158
AK097370	8.99062	10.5071	8.55042	4.11995	4.37811	4.64572	4.98776	4.317	4.57082	4.50125	4.51111	3.67859	4.11848
AK097453	18.958	17.071	24.6628	7.79473	8.1194	6.49923	6.94819	7.9954	6.84882	7.6368	8.31372	8.68649	6.8749
AK098263	16.7327	15.5806	16.7565	6.21422	7.26467	5.77144	6.52017	7.19763	6.19503	5.26985	6.21488	7.15429	6.52814
AK1	301.315	291.459	249.866	278.916	276.763	300.682	254.454	326.412	413.189	268.522	251.179	513.672	536.9
AK130486	14.5616	14.1705	13.4845	6.92866	7.07599	7.7937	8.52395	6.68828	6.55531	6.16713	7.38549	7.08178	8.69292
AK131021	6.7019	6.46885	7.69884	4.39533	3.84503	3.72981	5.77046	5.20428	3.89795	3.85213	4.47619	4.13673	3.88914
AK2	383.517	378.301	324.612	881.168	838.591	729.311	721.167	662.524	691.843	450.551	443.814	627.247	628.392
AK3	1784.05	2000.44	2197.22	1015.24	1156.42	877.83	877.963	640.639	620.926	1390.36	1517.71	1048.89	1030.88
AK5	40.4226	35.6945	30.349	43.997	29.5846	7.99528	5.99701	8.37723	6.37736	93.062	79.2237	159.602	159.245
AK6	1756.54	2018.24	1646.26	842.034	839.34	1401.15	1451.66	1299.14	1125.77	1735.99	1955.26	1254.65	1207.72
AK7	9.27282	8.05858	9.14022	4.59032	4.34569	4.50523	4.30921	4.792	4.43264	4.29536	4.46998	4.17207	4.03199
AK8	8.49926	10.1497	11.3001	7.80748	8.32824	7.56449	9.62206	7.75433	7.53254	7.57994	7.92597	8.71775	8.30089
AK9	23.6034	21.915	34.227	7.373	7.62756	24.4062	14.78	9.27951	11.4896	8.77504	10.6405	7.08463	6.9102
AKAP1	89.6917	88.2992	111.857	164.804	157.664	137.938	165.167	225.001	233.687	215.475	218.028	51.9238	58.8947
AKAP10	96.5841	96.556	107.824	164.749	172.751	60.4325	72.5711	47.8177	58.9826	67.5201	82.9471	39.9797	40.9346
AKAP11	433.773	509.685	488.02	351.713	361.566	279.322	318.806	334.044	293.134	586.508	584.668	322.577	304.068
AKAP12	3567.61	3738.92	3141.52	46.6515	28.9463	597.994	639.026	586.557	592.116	394.783	419.3	21.584	19.2173
AKAP13	254.417	232.198	223.089	90.6218	75.5485	53.7192	63.7906	46.8152	48.0629	72.3864	74.7287	73.0865	84.867
AKAP14	10.2483	9.36652	10.8027	6.77176	7.19288	4.52537	5.45981	5.34972	5.19829	4.95663	5.07733	3.96516	4.68263
AKAP17A	194.689	211.51	183.252	208.011	203.938	180.435	194.656	124.483	108.538	167.449	177.247	132.238	132.988
AKAP3	8.05613	6.4581	8.3646	4.48734	4.38476	4.46828	3.74614	4.6469	4.75031	4.28211	3.83995	5.19625	5.4138
AKAP4	12.3168	9.82251	14.3052	7.63004	6.83592	6.65395	7.20564	6.24646	6.05523	7.59297	6.9839	7.05006	7.77664
AKAP5	91.1778	83.7995	47.8429	13.4832	18.1785	10.3916	10.7039	8.49476	10.2885	10.2615	10.4918	8.31121	10.2667
AKAP6	16.2551	13.0791	13.9342	9.55261	13.7041	5.18685	5.64463	5.98465	5.01177	5.40276	5.7917	5.47915	5.05668
AKAP7	222.585	261.204	227.203	55.9294	59.3911	78.3278	67.3928	41.1748	29.0516	68.3846	74.9029	57.6047	66.5973
AKAP8	400.656	357.619	316.58	233.446	196.236	380.027	362.839	163.145	181.028	293.322	274.639	205.048	203.554
AKAP8L	55.634	60.6172	71.2409	37.857	40.364	51.8735	51.7906	24.9035	28.778	51.3005	49.4099	39.918	37.7961
AKAP9	541.093	451.287	469.777	135.468	135.763	110.335	118.143	206.561	212.145	209.955	213.913	175.276	195.925
AKIP1	344.579	291.94	423.708	376.376	438.033	411.669	427.481	418.949	425.89	385.117	352.681	347.969	326.011
AKIRIN1	554.888	723.291	962.459	406.382	409.123	358.955	372.796	255.971	229.529	214.613	237.93	609.555	538.458
AKIRIN2	461.359	416.654	426.025	143.732	160.267	343.952	369.803	470.663	497.385	396.431	370.337	324.329	313.045
AKNA	16.4754	17.4543	20.1186	3.87615	4.90836	9.45262	10.2405	5.07385	5.49492	5.62408	5.99318	25.5074	22.8798
AKNAD1	11.8587	8.8221	10.4523	4.6045	5.22447	4.28701	4.61242	10.2234	12.2725	4.55953	4.94163	4.32164	4.94093
AKR1A1	1800.45	1733.94	1768.57	767.799	781.722	1206.32	1122.43	304.785	397.831	885.852	857.265	1086.31	1043.58
AKR1B1	1569.37	1316.59	1316.88	2944.97	3545.93	2794.64	2688.49	2278.47	2537.18	3207.21	2981.33	4528.84	4483.97
AKR1B10	20.1987	17.6516	25.5691	982.81	1459.97	6.09344	5.81833	17.8676	15.2403	29.4671	38.8082	243.217	223.186
AKR1C1	33.5656	33.7158	28.5363	799.159	1111.28	13.6066	12.7802	273.131	400.471	368.66	404.247	341.998	321.992
AKR1C3	163.498	148.66	96.3299	1106.24	1680.4	21.3926	13.6738	412.996	571.829	120.994	99.5625	625.725	653.158
AKR1C4	12.3438	9.72532	9.96059	5.97864	6.19124	5.17067	3.76072	4.55529	4.49845	4.55965	5.08078	4.47906	5.36231
AKR1C6P	13.1652	12.8706	14.3302	6.24118	4.63855	5.2848	4.61632	6.51345	5.058	5.25379	5.54456	6.15703	6.56682
AKR1D1	9.3598	9.11211	7.58331	4.18681	5.15564	3.95898	3.98525	4.32731	4.8232	3.93719	4.25298	4.1452	3.70315
AKR1E2	28.6671	23.1418	24.8206	7.37319	8.28826	8.11051	7.75951	9.22805	7.02355	7.0525	8.57544	7.93413	7.59866
AKR7A2	1192.58	1094.15	1232.71	1176.84	1282.88	1267.24	1180.79	656.931	728.469	1023.09	1005.57	954.169	920.416
AKR7A3	56.3709	72.9752	64.6068	59.0996	57.2255	43.7645	54.2091	27.514	25.295	44.0616	47.6219	44.255	53.6504
AKT1	399.986	380.405	409.072	893.187	929.648	447.378	498.037	534.651	544.075	696.85	703.567	632.986	598.778
AKT1S1	36.3423	52.4394	60.8836	155.445	155.009	302.115	306.47	172.483	190.473	180.542	170.726	159.126	162.625
AKT2	36.4992	33.0252	34.4088	121.871	140.185	94.3203	60.9586	47.1211	42.899	37.2314	35.5496	30.9553	34.5445
AKT3	464.717	490.31	426.779	64.4681	64.0759	185.793	189.601	336.137	335.01	157.887	166.736	144.72	131.642
AKTIP	469.142	490.229	530.479	563.812	537.815	412.104	388.358	261.432	253.599	265.488	275.312	117.933	134.447
AL022341.3	16.7576	13.5414	14.323	10.1747	12.0047	12.3386	11.3099	10.0707	14.7385	10.2618	11.2065	13.0333	14.9321
AL022344.5	8.9673	10.3434	9.77183	5.01724	4.88522	4.82693	5.26909	7.29566	5.00895	4.45425	6.29623	4.68256	4.63049
AL109706	10.2268	10.5413	10.3169	4.33661	5.8179	5.01433	4.74655	4.68119	5.30477	4.56571	6.42278	5.49331	4.80255
AL132709.8	722.509	827.69	596.404	3.67611	3.11447	4.07302	3.85139	4.39582	4.4548	137.116	341.787	7.72836	10.1744
AL133493.2	11.7767	10.4574	12.5448	5.784	6.30132	11.1465	10.3471	6.67167	6.1505	4.65389	5.72579	4.63498	4.10545
AL590762.11	47.9868	52.6814	58.5661	23.6133	32.4149	18.4861	16.1654	17.5854	14.4589	15.3413	16.3309	20.9784	17.8094
AL832163	16.0623	11.169	16.5252	5.05266	5.51612	5.43135	5.53751	4.51858	5.70207	6.31146	7.38413	4.94492	5.59295
AL833181	36.1754	64.8652	37.5337	5.38377	5.54676	6.63887	6.11708	4.94854	6.11789	10.2311	9.11078	7.3613	6.39062
AL928742.12	8.62068	7.79601	7.89211	3.96896	3.83351	4.78519	3.96712	4.92862	5.14412	5.31777	4.56871	3.51783	4.16145
ALAD	205.683	249.02	273.915	82.4265	87.6398	82.6026	90.0954	167.157	167.339	74.4651	79.463	131.359	151.346
ALAS1	1103.62	1003.01	1097.08	960.45	1055.93	475.222	450.475	328.068	351.678	591.589	604.653	680.608	675.823
ALAS2	8.33194	7.42485	7.316	3.60094	3.70118	3.6198	4.04145	3.92089	3.68299	3.76969	3.77137	3.71552	3.70707
ALB	9.5773	8.95902	9.34174	4.86584	5.00685	4.70607	5.07854	4.89576	4.94948	5.72286	5.33033	5.28844	5.10002
ALCAM	3120.17	3097.77	3122.26	542.184	616.202	2685.97	2508.31	773.982	739.496	1102.79	1185.67	1198.44	1143.66
ALDH16A1	50.6613	43.886	51.3248	27.1912	32.9672	66.5916	43.9584	51.4536	39.9002	75.7515	58.8888	28.7204	33.8076
ALDH18A1	1244.24	1104.9	1141.19	1275.87	1223.16	1054.57	1036.25	918.212	944.922	1247.74	1275.96	1189.98	1165.18
ALDH1A1	11.6231	9.46297	11.5536	11.9369	15.4947	6.51902	5.88006	5.75569	6.25096	5.89964	5.33172	8.82023	8.50788
ALDH1A2	12.3691	8.7655	9.59641	6.2193	4.97356	5.32464	5.58018	6.35701	5.41435	6.32647	6.4899	5.55927	5.39025
ALDH1A3	902.732	837.16	847.474	5.02449	4.02866	36.117	33.7921	2106.47	1574.09	1735.08	1725.12	38.2694	21.7204
ALDH1B1	43.7707	71.0645	123.667	64.0553	60.4075	191.771	235.289	35.3542	43.962	15.9399	17.0173	93.9731	71.2023
ALDH1L1	31.3652	29.6474	31.0992	14.3114	10.9723	14.9556	15.3703	11.756	12.81	12.3281	10.9066	12.0112	12.6286
ALDH1L1-AS2	10.1994	12.7119	11.222	5.36806	4.18217	5.69743	5.54003	5.27017	5.80224	7.11291	5.75401	6.44428	6.18041
ALDH1L2	560.011	675.722	653.547	4.71342	5.2239	11.5368	10.7591	11.494	9.80368	7.24336	11.1825	69.2098	73.1251
ALDH2	1807.13	1841.36	2134.31	776.546	865.224	445.184	448.894	6.82939	10.2897	780.467	827.756	240.333	239.355
ALDH3A1	12.8338	11.3994	12.0587	105.048	117.19	8.75822	8.8515	10.1106	8.43902	294.167	309.703	7.50038	9.17171
ALDH3A2	497.678	449.552	456.814	785.36	793.944	230.699	183.428	287.453	305.21	819.931	851.978	285.794	288.464
ALDH3B1	18.848	18.9469	20.4665	19.56	29.7594	18.9469	25.4996	38.0597	38.3851	31.8686	23.7962	44.0779	35.7021
ALDH3B2	9.14837	8.43733	9.18953	4.25211	4.4499	4.31505	5.0116	4.61877	4.20253	4.81879	4.28415	5.05853	4.32398
ALDH4A1	39.0587	32.6196	36.6196	17.0534	18.2617	39.536	43.2344	16.1308	16.6135	53.757	47.4024	16.7269	14.0852
ALDH5A1	105.702	85.8244	84.131	24.4329	35.4119	56.4669	60.6632	9.12942	13.6145	5.09254	7.70401	5.12971	4.95433
ALDH6A1	145.128	145.665	185.447	142.898	148.915	25.4683	16.669	84.4641	87.6547	141.149	168.907	47.7078	55.737
ALDH7A1	670.347	685.063	502.549	572.992	585.842	413.763	414.3	904.4	1015.48	868.33	929.685	616.514	547.067
ALDH8A1	22.2245	15.901	25.9769	4.05953	4.14679	10.1154	5.55235	4.41711	5.17077	17.8985	29.0194	4.06403	5.0331
ALDH9A1	3623.26	3727.23	3901.55	768.803	907.16	1476.71	1612.88	968.279	1058.43	951.013	938.331	2162.38	2259.61
ALDOA	4560.61	3997.13	5520.58	4891.67	4966.71	4436.55	4144.68	4282.14	4531.64	3509.28	3344.05	5440.2	5590.52
ALDOAP2	17.9887	17.3358	12.9276	6.20191	6.43649	6.20912	5.67689	5.77568	8.08206	5.71986	6.68846	6.66483	8.48352
ALDOB	10.9239	9.78912	10.7629	5.1898	5.56495	5.9874	5.73319	5.97782	5.69828	5.88255	5.80588	5.69959	5.77439
ALDOC	36.671	43.9975	49.1456	1094.86	1183.32	18.7256	19.282	18.9747	46.4298	16.941	15.1353	17.456	16.3742
ALG1	133.976	169.105	176.556	63.0985	67.4826	141.565	152.206	96.1681	75.2408	110.483	99.1653	148.507	121.312
ALG10	20.5696	17.2645	15.9926	45.4608	43.8146	28.2731	34.6868	67.2846	43.6532	9.03971	9.65634	11.5699	12.3349
ALG12	39.1176	36.681	35.5343	48.8954	66.8997	37.9957	38.3675	49.5848	57.3248	69.0733	64.2718	32.5578	36.1242
ALG13	291.682	307.966	357.112	314.611	326.58	251.306	268.602	269.263	228.541	223.674	265.351	201.367	198.473
ALG14	347.079	294.854	334.582	178.767	193.424	185.554	217.144	187.879	172.905	162.522	166.468	246.19	279.855
ALG2	1563.92	1566.58	1764.46	433.267	447.914	579.022	582.838	344.906	346.537	223.23	221.193	625.755	603.463
ALG3	281.491	318.114	294.91	334.448	334.744	463.666	438.983	328.979	357.838	295.611	278.678	548.504	528.226
ALG5	788.046	805.103	795.479	514.52	497.364	320.972	329.698	492.049	516.763	792.624	849.439	300.91	293.045
ALG6	287.254	313.455	301.134	288.02	294.557	237.978	251.165	747.226	737.422	206.192	193.913	312.09	293.91
ALG8	871.002	855.731	820.146	991.474	1022.59	687.921	695.749	2010.2	2134.47	610.234	620.323	535.716	509.146
ALG9	414.34	390.239	401.223	358.37	354.584	226.418	243.37	49.6741	51.6254	220.091	230.703	178.218	195.995
ALK	146.513	144.84	239.826	6.18556	7.82458	6.09691	6.75222	6.62193	6.42112	6.31607	6.30192	17.8715	14.3633
ALKBH1	148.836	135.016	160.85	344.892	308.886	124.392	105.558	121.701	118.426	152.912	132.084	109.657	113.545
ALKBH2	166.445	156.904	154.241	152.008	154.581	89.2379	83.3319	330.214	385.61	164.293	168.47	96.2588	89.1853
ALKBH3	426.316	372.669	372.277	396.171	359.347	405.723	392.717	225.547	269.247	423.35	375.414	288.666	258.555
ALKBH3-AS1	8.82733	8.86332	7.73533	5.0108	4.25965	4.20296	4.73344	4.55413	4.11432	3.78875	4.86688	4.73215	4.57204
ALKBH4	31.1012	41.7877	39.5529	114.12	94.807	40.4267	63.812	105.279	91.7674	66.2471	84.4559	103.49	95.5657
ALKBH5	232.505	217.999	275.179	633.502	674.386	419.257	453.187	340.804	319.556	440.746	383.633	551.177	490.64
ALKBH6	346.989	321.975	393.453	614.009	654.817	486.319	570.499	258.619	317.13	427.696	429.823	223.335	259.132
ALKBH7	169.397	163.081	173.376	130.772	150.261	332.63	326.783	84.0271	100.837	273.139	250.218	211.627	221.096
ALKBH8	301.571	339.642	246.475	111.845	98.0584	60.2975	49.4359	32.3806	25.4219	67.7909	67.6426	48.2907	50.4245
ALLC	7.61382	8.69473	8.9448	4.55116	4.86205	4.45476	5.15546	5.91104	4.93997	4.19775	4.42246	4.13031	5.53194
ALMS1	483.92	533.904	364.119	75.7009	66.8318	109.365	110.558	65.3104	67.6148	84.1765	111.582	146.15	134.934
ALMS1-IT1	24.705	15.4141	18.1799	134.045	112.717	5.78718	6.15316	18.2398	12.9903	8.55963	9.95704	11.6555	10.1984
ALMS1P	15.6188	15.5724	13.0211	4.75813	6.10366	5.89811	6.19442	5.74731	6.37609	5.47508	5.20041	6.38318	5.41331
ALOX12	10.0831	9.57612	9.83106	5.17521	4.69234	3.66347	5.00039	5.47529	3.93258	4.84172	4.54953	4.56021	4.33416
ALOX12B	8.8501	7.7757	8.66857	5.2529	5.34712	5.29648	5.09194	5.14387	5.28153	5.37716	4.81227	4.3895	4.88602
ALOX12P2	9.50204	10.1119	8.31245	3.89031	5.16632	3.75912	4.12598	4.91203	4.55854	3.66627	3.8741	4.24048	4.14283
ALOX15	18.3153	14.0382	14.2697	10.0768	7.83794	7.43033	6.67527	7.5726	6.70944	5.96239	7.51984	7.41622	8.05036
ALOX15B	8.25412	8.23306	7.88425	4.46029	4.64148	4.59163	4.21284	4.46271	3.82613	4.77563	4.43534	4.23071	4.33931
ALOX5	8.72251	8.54874	8.36981	5.28592	5.79158	6.08072	5.34304	5.04669	4.83895	5.96293	5.21462	5.076	5.43574
ALOX5AP	32.7932	33.3367	71.1083	5.63506	7.99585	4.32684	8.56735	5.69718	6.27284	72.7018	58.5879	7.88863	7.91733
ALOXE3	7.45497	8.50071	9.59559	4.49729	4.48358	4.49419	4.35137	4.41888	4.61741	4.14856	4.27563	5.14306	4.3337
ALPI	8.27925	8.33202	8.4737	4.18518	4.9211	4.65606	4.67051	3.88564	3.85664	4.7985	3.9239	4.50665	4.49775
ALPK1	18.769	17.9973	15.306	11.4734	11.4471	10.9197	12.4659	12.7178	12.6431	8.85432	9.23203	11.9391	12.9155
ALPK2	3380.57	3537.63	4086.15	449.745	419.755	314.437	275.104	4.08047	5.49998	724.671	752.994	281.661	219.035
ALPK3	13.7196	16.9491	16.8657	4.74801	5.8937	7.67696	7.67752	4.77966	5.95815	5.36756	5.41857	4.96198	5.31194
ALPL	18.0253	19.8354	13.5744	5.71693	6.37305	6.72349	6.38247	5.99848	6.38678	6.69444	6.68058	15.4126	13.3322
ALPP	7.26482	7.74717	7.70862	3.13722	3.83941	3.97598	3.76611	3.8168	3.48441	3.08454	3.92085	3.78047	3.38197
ALPPL2	10.4672	11.1674	11.6482	6.5708	6.65572	6.82256	7.30284	6.55209	7.52296	6.67176	6.37118	6.35812	7.77054
ALS2	342.022	340.938	364.066	74.0961	72.0516	73.3607	56.8907	106.345	121.792	129.373	138.372	99.1588	101.109
ALS2CL	17.0986	17.6081	21.0951	13.5646	12.2694	16.2215	16.6381	9.85739	8.62508	19.6692	12.8063	8.46017	8.60685
ALS2CR11	13.8385	11.7668	13.5548	4.59543	4.39144	5.19834	4.83433	4.69784	5.02026	4.70914	5.0888	4.93434	4.66607
ALS2CR12	16.6123	17.326	15.5381	5.57159	6.03705	4.89311	5.41164	5.85348	6.32756	5.9576	6.12678	6.63649	5.7007
ALX1	14.8724	12.4871	11.0215	6.19603	6.23487	16.742	14.1901	5.42904	5.77052	4.39402	5.12178	6.27427	5.37766
ALX3	16.3087	14.2412	15.1211	6.13628	7.00371	6.26461	5.87079	6.30518	6.71012	6.36791	7.44261	6.18112	6.69107
ALX4	7.23296	7.09507	6.94325	6.79931	6.21794	5.24605	4.89779	5.30937	5.24848	5.38462	4.91256	5.44782	5.19448
ALYREF	720.362	750.822	580.276	1563.26	1662.63	1120.28	1422.86	2248.57	2324.18	1129.76	892.641	929.566	1024.28
AMACR	14.9029	15.1144	11.1997	6.61444	5.91755	4.77327	5.83436	8.12082	7.841	5.57883	6.65349	5.38315	5.50564
AMBN	16.1299	13.9138	13.2332	4.28611	4.48751	4.4739	4.54242	5.69096	4.00411	3.97653	4.44004	4.77579	5.06777
AMBP	10.0199	10.2514	9.64584	4.71046	4.86707	5.03315	4.87946	4.54801	4.56482	5.25181	5.06859	7.42518	5.88408
AMBRA1	84.0117	103.165	90.6331	56.3716	53.8364	46.2705	55.6266	48.2394	46.7406	39.7373	40.9923	46.1611	42.9783
AMD1	1037.59	985.886	808.092	1610.69	1649	1228.69	1117.76	1451.46	1381.46	885.956	844.919	981.827	990.505
AMDHD1	13.0583	9.89763	11.4521	5.33926	4.9949	6.27429	8.91977	19.0238	28.0856	5.09784	5.03304	9.88785	9.97707
AMELX	9.85336	9.91271	8.36405	5.92418	5.20852	7.2653	6.07148	5.48184	5.50062	5.94934	5.73136	5.38715	5.00344
AMELY	10.8818	12.3217	12.0795	5.51857	5.57726	5.42163	6.41105	5.60653	6.4232	6.81751	6.68525	6.40883	6.26047
AMER1	10.9979	13.419	11.9574	6.36302	5.31808	7.76038	6.13411	6.7165	6.06989	6.95081	7.33122	8.53695	9.05836
AMER2	13.5269	12.7439	12.9428	5.2182	5.18997	5.3952	5.48014	5.13308	4.53808	5.3821	5.97765	5.41275	6.16051
AMER3	9.08096	9.96621	10.226	4.59354	5.09546	4.79308	5.559	5.33423	4.88248	4.65363	5.19256	5.66816	5.23572
AMFR	110.149	112.501	139.498	253.335	212.89	202.754	229.85	103.015	100.831	131.584	109.823	38.8159	30.1509
AMHR2	8.90694	10.1921	10.0622	5.34622	5.36826	6.31869	5.71967	5.33754	5.30717	5.36683	5.27934	5.72909	5.38673
AMICA1	13.3422	17.9616	16.3948	7.61282	8.55765	7.93729	9.14836	9.15861	8.11436	9.73143	7.177	7.08095	6.82102
AMIGO1	19.1631	25.1686	19.7912	21.797	11.3036	15.4722	19.4875	7.96931	9.80574	9.67335	13.1199	13.2742	15.7681
AMIGO2	8437.9	8756.19	8492.06	1864.97	1975.3	1055.02	1183.03	1417.38	1157.33	958.538	1182.34	254.958	232.232
AMMECR1	570.726	562.395	507.198	168.985	157.451	120.173	129.976	709.459	615.444	268.211	300.294	349.179	359.969
AMMECR1L	2971.35	2891.99	2557.36	386.467	407.442	394.488	384.358	586.135	580.673	517.083	505.806	479.331	492.279
AMN	12.8154	14.777	16.2291	7.36444	8.1958	7.97037	8.7894	7.19297	7.89817	7.97463	7.08571	8.92524	8.77657
AMN1	110.683	83.1155	143.739	17.3059	20.0387	12.0298	8.8704	12.9958	26.4354	33.5435	38.0793	9.20399	10.812
AMOT	9.24185	8.42581	8.16693	3.77175	4.45786	3.97078	4.22008	4.88824	5.28178	5.30493	4.70912	4.70861	3.77337
AMOTL1	590.633	540.499	555.488	198.236	162.869	81.1729	77.3257	260.338	246.366	192.088	191.611	109.301	112.196
AMOTL2	1942.73	1854.83	2213.6	435.155	328.729	867.591	938.124	419.537	342.875	576.682	649.627	488.502	502.859
AMPD1	7.27376	8.66745	7.0063	3.01676	3.20624	3.55202	4.15219	3.6213	3.28518	3.70595	3.59464	3.99222	3.84258
AMPD2	352.141	331.383	379.601	132.456	135.574	209.3	164.636	143.609	127.451	109.443	100.684	516.959	522.215
AMPD3	165.393	130.517	180.813	165.014	180.038	31.413	44.3549	11.4181	6.07662	44.8812	62.0995	76.7849	82.5516
AMPH	131.3	130.248	101.149	3.34869	5.1148	380.213	413.843	37.1377	41.8444	208.116	176.204	490.352	472.022
AMT	31.1993	35.8904	39.8144	7.75459	9.59546	7.26169	7.84344	10.4669	11.5045	13.6472	14.8999	7.9744	9.68189
AMZ1	20.7267	18.031	21.4831	8.28164	6.96372	9.03566	7.63963	8.14867	8.10449	7.517	8.19592	11.5931	9.73327
AMZ2	1618.73	1538.06	1451.02	1510.56	1581.66	1231.65	1194.03	1460.97	1580.46	1517.14	1589.03	1061.14	1035.5
AMZ2P1	310.665	389.461	339.656	370.733	435.297	151.159	223.866	441.984	419.128	373.652	441.362	194.857	207.228
ANAPC10	345.307	375.744	359.514	332.328	379.027	156.748	187.628	257.222	241.109	118.244	147.173	199.67	186.02
ANAPC11	2774.44	2524.77	2522.14	1106.85	1148.21	1125.77	1134.48	1796.74	1977.33	1456.33	1624.84	1082.12	1060.77
ANAPC13	1953.36	1880.25	1941.72	697.997	702.374	642.81	691.608	769.401	740.315	652.361	729.104	739.307	757.762
ANAPC15	156.279	176.955	128.897	245.485	216.387	300.925	276.352	231.551	279.23	326.186	339.052	164.869	158.211
ANAPC16	1023.13	991.395	1122.55	568.485	575.972	309.819	299.947	550.503	596.772	565.745	588.132	544.731	556.071
ANAPC2	34.9332	31.301	31.4635	76.8666	92.3559	119.355	110.363	104.771	109.064	77.7652	70.868	121.269	139.935
ANAPC4	996.43	948.768	954.467	707.308	719.848	571.724	554.242	578.241	610.114	505.393	605.467	511.559	445.209
ANAPC5	1106.14	1024.71	988.088	744.249	771.872	633.488	608.831	577.799	623.791	587.07	578.059	662.75	674.041
ANAPC7	512.964	445.874	472.805	656.195	623.911	321.402	324.365	348.28	349.457	309.878	314.343	245.087	248.293
ANG	20.2511	12.9199	15.8619	5.59029	5.41341	19.9679	17.1164	10.3454	15.4443	5.03135	6.65005	24.1468	32.5883
ANGEL1	58.9135	68.5201	83.5224	59.3461	71.824	33.8187	26.2984	30.1353	31.0954	38.6998	35.3373	28.035	26.8212
ANGEL2	264.978	257.68	256.82	143.96	150.27	173.837	190.981	89.027	78.2751	87.8442	80.7882	241.947	215.095
ANGPT1	106.702	100.993	141.998	50.3752	43.9358	4.58399	5.42843	16.0895	22.5746	20.0865	29.3104	471.217	494.165
ANGPT2	204.697	165.82	36.5652	5.32796	5.49661	4.80783	5.65746	5.35017	5.7295	51.0066	46.1492	41.2602	44.4722
ANGPT4	13.4073	19.848	12.1332	17.203	10.5116	4.67435	4.78248	6.33404	4.36241	4.98032	5.08874	4.81136	5.31885
ANGPTL1	12.5688	12.4286	9.5576	4.82727	5.60877	5.06008	5.46833	15.7798	24.3438	4.9528	4.60277	4.80013	4.96061
ANGPTL2	41.5801	37.0016	36.2691	7.69354	7.94781	14.6946	12.8636	93.2862	108.928	116.743	104.491	356.269	420.957
ANGPTL3	10.6786	8.26418	10.7793	4.93274	5.41225	4.52547	5.39173	4.40036	4.69316	4.88447	5.48891	5.41437	4.99856
ANGPTL4	42.2093	42.2333	114.384	7.2009	7.3195	9.73536	10.2214	9.5154	10.3217	10.0694	8.55561	9.63276	11.4427
ANGPTL6	10.5059	10.3418	8.78812	6.93743	6.30864	6.0223	6.21042	6.26533	5.87314	8.61273	5.42865	6.11472	6.28008
ANGPTL7	7.24389	7.45197	8.34808	4.17109	4.72954	4.09949	4.37999	4.81277	4.057	3.72698	4.49675	4.19145	3.97375
ANHX	34.0043	27.7805	26.3415	6.58108	7.41113	8.5702	8.87038	8.91821	6.22006	8.65234	8.56904	9.66888	11.3431
ANK1	42.8335	32.5498	47.2756	6.78701	6.28398	6.721	6.81797	6.85933	7.65778	112.22	103.965	11.0365	10.1265
ANK2	54.5396	62.5557	80.8777	4.54109	4.35486	27.2261	27.7114	21.31	26.5378	6.49197	7.27812	24.7898	20.0364
ANK3	411.899	410.08	366.533	62.5822	55.0778	6.67628	8.58418	25.32	38.166	8.71447	7.25814	16.0704	15.5031
ANKAR	12.0206	11.7831	9.70376	5.66497	4.34724	5.02596	4.61957	5.56785	6.0855	5.60126	5.47726	5.10283	5.25021
ANKDD1A	30.1572	29.0466	46.3097	8.19754	8.51271	9.00895	11.2082	7.2119	8.31233	8.43079	9.76129	11.1431	10.4514
ANKEF1	18.5456	19.8803	17.4582	4.94202	4.90627	10.4007	15.5641	23.6768	24.8112	5.83127	6.25307	42.1689	35.2971
ANKFN1	15.6679	11.2215	11.216	6.78822	6.56314	5.65035	5.75547	7.04723	7.04751	4.94831	6.12843	5.51771	5.85884
ANKFY1	306.887	316.943	390.824	218.515	232.898	224.763	226.881	108.988	110.733	224.483	233.045	148.847	161.689
ANKH	276.72	267.132	237.575	29.1485	33.2644	57.1827	51.0629	275.417	349.189	4.72628	5.4361	38.7265	31.7281
ANKHD1	54.1694	48.5229	46.6988	30.5646	31.4284	18.5243	21.1468	30.932	50.1622	36.7875	33.8898	11.8655	11.7878
ANKIB1	798.846	832.631	799.55	347.533	340.142	287.221	297.421	386.454	438.172	308.102	350.341	566.09	573.036
ANKLE1	11.0044	10.6339	12.7267	5.04756	5.68126	5.46941	5.22089	5.5438	6.28356	7.53463	7.0054	8.67867	6.67104
ANKLE2	294.59	349.145	305.323	254.114	233.289	166.568	172.03	149.848	113.681	129.338	131.599	184.262	166.62
ANKMY1	14.7834	17.019	15.2429	8.6895	8.94068	7.84595	6.87626	8.96895	9.64952	9.39928	7.7943	8.1152	9.28518
ANKMY2	1028.87	966.368	1107.96	1028.08	1076.7	1004.8	955.34	564.136	571.804	270.027	269.216	968.521	955.964
ANKRA2	703.366	855.172	865.48	202.807	234.117	207.974	223.023	197.047	160.062	533.928	635.879	198.074	215.855
ANKRD1	1361.1	1300.71	1930.36	4.691	4.66061	5.20056	6.20582	3.79446	3.6096	4.62412	5.02362	4.01529	3.75637
ANKRD10	527.394	547.813	456.523	98.1436	102.117	161.875	160.617	195.986	204.682	686.749	685.386	119.649	114.925
ANKRD10-IT1	736.193	747.681	541.132	68.8166	96.6075	47.6601	63.542	137.595	159.917	140.218	160.115	32.7953	33.0369
ANKRD11	343.238	339.977	303	194.764	175.542	143.935	153.315	155.453	182.927	122.869	147.252	111.302	111.414
ANKRD12	340.789	387.31	335.908	258.244	284.722	118.697	116.494	94.7102	77.7902	152.081	181.275	103.054	102.449
ANKRD13A	1329.37	1190.24	1691.34	526.945	419.192	588.009	650.787	343.135	299.694	705.451	687.132	489.554	481.078
ANKRD13B	27.2038	29.4426	20.8322	43.6196	47.5989	68.4589	61.2762	49.3278	64.1307	71.7232	66.9304	46.3062	33.2051
ANKRD13C	254.218	309.858	288.66	121.714	124.711	152.016	146.038	206.911	172.547	268.642	299.041	207.648	174.715
ANKRD13D	56.7307	61.8966	59.588	33.0631	32.6225	19.0856	18.1005	21.1933	23.0298	21.0053	25.3848	19.605	20.471
ANKRD16	43.821	42.886	45.9389	8.69721	8.37692	25.8711	26.3399	33.6001	36.0524	27.9372	20.7204	36.0198	31.8965
ANKRD17	1799.24	1820.67	1710.51	677.958	637.085	769.375	841.735	537.577	573.358	404.898	490.599	711.303	712.902
ANKRD18A	9.59811	10.1046	8.71457	5.18551	7.1517	11.4169	17.0005	4.80421	4.65333	4.6559	4.89129	4.94405	5.04054
ANKRD18B	13.0255	11.8733	10.344	7.98367	8.13274	5.0682	5.56791	4.85578	6.2321	5.13787	6.12017	5.91844	5.60744
ANKRD19P	9.45849	10.8487	12.4651	9.65967	7.53294	5.21309	5.74778	5.6334	7.32058	5.56213	6.07417	6.42678	5.8613
ANKRD2	12.8196	13.0839	13.4306	7.361	7.75198	8.52244	7.68331	7.69031	9.2527	7.94793	7.37024	8.85627	8.22537
ANKRD20A11P	168.877	170.023	160.007	53.4504	57.9915	25.0363	27.8261	19.6911	24.177	19.2531	19.2607	20.1226	22.5043
ANKRD20A12P	11.9118	10.9213	11.5849	6.40276	4.94819	6.48156	6.19855	6.39088	6.41652	5.33314	5.52836	5.24184	7.50655
ANKRD22	19.5178	15.582	17.7611	6.66338	5.96164	5.56718	6.00029	5.88965	5.69642	6.36741	5.90766	6.52385	7.94542
ANKRD23	18.1432	13.3815	17.7946	7.60919	6.52749	5.89236	6.88007	10.3274	15.2369	11.4517	6.64306	8.51929	10.3517
ANKRD24	9.94482	9.31315	11.2577	6.0616	5.79712	6.27637	5.87854	5.85981	6.16543	5.61658	6.59253	6.0738	6.22927
ANKRD26	44.5251	43.2543	46.023	24.8511	24.5347	21.7675	19.3267	8.3779	8.53415	12.5788	12.049	19.4226	18.8966
ANKRD26P3	9.8003	10.8307	9.33479	4.48379	4.16254	3.87674	4.44761	4.55428	3.64123	3.6258	5.04625	4.04532	4.17408
ANKRD27	727.121	714.106	656.46	1123.44	1144.38	983.979	1042.77	490.955	477.605	612.873	652.126	829.617	770.573
ANKRD28	410.287	408.472	328.713	292.678	284.068	244.346	239.936	493.051	452.853	290.922	366.664	270.314	294.032
ANKRD29	9.71548	9.70222	15.1833	5.33438	5.67092	4.40294	4.1229	4.71023	5.25199	434.697	474.469	26.2673	29.1929
ANKRD30A	8.21573	9.35478	9.48405	3.85455	4.62502	3.91007	4.0221	3.97955	4.25396	4.07097	4.3063	4.42283	5.33743
ANKRD30B	17.2409	15.0203	13.204	7.3109	6.85196	28.2307	15.6061	6.09373	6.2081	7.73678	6.44792	6.83636	5.96677
ANKRD30BP2	14.2237	9.50839	11.07	5.64816	3.93291	21.6336	14.9457	4.83904	4.7921	4.40319	3.43705	4.70726	5.75395
ANKRD30BP3	10.6018	9.26399	9.50291	5.14543	4.10194	4.8771	4.33202	4.71061	4.71091	4.27309	4.99993	4.32374	4.56942
ANKRD31	14.738	11.9774	11.923	4.31887	4.61883	4.3631	4.12881	4.72185	4.53981	6.57313	4.66319	4.66245	4.24447
ANKRD32	168.838	112.552	99.1489	315.341	269.377	233.259	250.136	259.277	239.193	126.511	137.781	136.167	113.991
ANKRD33	10.5491	12.6382	8.48157	5.67055	5.3339	3.79678	5.97419	4.47561	4.64657	4.48575	4.568	5.71263	6.03415
ANKRD33B	19.8744	19.3293	21.818	5.32668	5.21097	20.8851	31.6829	5.47836	5.43613	22.6964	13.528	5.59397	6.21422
ANKRD34A	14.4432	16.7995	27.0096	4.91608	6.07793	5.13947	5.16169	7.37025	8.1783	5.02499	5.75364	18.1223	13.7021
ANKRD34C	8.34646	8.26497	7.5365	4.22606	3.30427	4.49605	3.4442	3.41944	3.39695	3.70265	3.44744	4.1698	3.41522
ANKRD35	30.3401	32.5964	21.4093	8.51473	11.9322	10.3129	8.96447	12.4541	8.75747	14.6356	13.818	154.527	98.8777
ANKRD36	240.489	282.247	186.861	14.482	17.0789	19.8081	25.3874	39.0052	27.8147	12.9631	13.8811	23.3682	19.2431
ANKRD36B	931.68	1001.91	846.152	17.2897	10.7577	283.724	376.185	66.5376	71.3324	46.1544	111.92	90.7554	88.2218
ANKRD36BP2	15.5908	13.2577	14.4999	5.62103	5.64668	7.57755	7.76019	7.0259	6.77602	5.26827	6.25931	5.81438	5.47201
ANKRD36C	28.2017	21.6331	25.8802	5.11378	5.59916	9.43056	8.9707	7.21868	8.06209	7.97966	10.0354	9.13438	7.33143
ANKRD37	58.5034	49.7531	126.864	178.808	202.87	80.7206	86.265	61.187	79.1155	20.8531	25.7616	134.699	132.41
ANKRD39	111.067	81.0678	83.2748	141.587	126.231	102.685	113.202	175.897	183.095	160.178	191.338	107.886	115.011
ANKRD40	458.13	435.455	444.325	115.261	129.926	115.222	126.752	151.88	136.315	135.119	132.708	101.896	90.291
ANKRD44	88.5592	103.32	95.9307	8.54463	9.14635	19.858	21.9203	55.7338	52.3428	39.0801	45.6549	29.2823	28.3656
ANKRD44-IT1	7.41242	7.17822	8.24771	4.10578	4.66036	3.93536	4.52171	5.07726	5.03731	4.80096	4.37571	4.04805	4.27898
ANKRD45	10.9017	16.4395	13.4357	4.99691	5.43285	9.0427	11.9572	8.92305	7.9279	5.48707	7.16797	6.57537	6.01328
ANKRD46	606.701	776.215	788.609	21.7673	33.3969	60.9561	78.8092	83.1621	114.16	86.5225	88.0468	97.018	71.082
ANKRD49	497.076	539.707	412.217	340.909	326.783	447.075	450.36	159.608	183.776	566.236	605.177	197.662	206.24
ANKRD50	661.617	600.501	551.808	345.063	337.388	83.0615	79.2027	135.557	124.256	121.305	142.292	160.185	145.149
ANKRD52	186.956	162.405	206.172	24.7934	27.0404	32.9426	41.873	50.1926	50.3817	27.6197	23.8772	36.4676	34.482
ANKRD53	22.9256	22.7382	22.5002	7.3437	6.77334	8.64483	7.40444	7.52715	7.4163	7.27322	6.59015	7.91923	8.86023
ANKRD54	89.1153	91.2477	104.549	144.542	132.426	85.102	118.937	253.955	255.031	97.5691	98.2925	95.2536	102.79
ANKRD55	13.0611	14.0437	10.8543	8.1391	9.3417	5.68393	6.48039	6.10117	4.92249	5.0794	5.84166	5.66939	6.13805
ANKRD6	362.057	365.844	486.283	5.66416	8.31898	134.383	117.219	33.1439	31.959	9.7095	8.84723	101.617	99.1456
ANKRD60	10.3942	9.49785	8.111	4.72574	4.90479	4.2268	4.75691	4.22687	4.62431	4.13686	4.44856	4.49402	4.1655
ANKRD65	19.0824	19.0381	20.9823	6.99776	8.12606	6.74443	8.78747	8.67033	7.61409	11.7775	9.15675	7.30301	7.00781
ANKRD7	10.5272	8.48895	8.82611	5.39324	9.49394	5.09369	5.29952	6.69939	5.04127	9.71294	8.47921	47.0015	37.2395
ANKRD9	190.264	167.699	201.372	106.588	112.582	83.7412	89.9944	70.174	88.4703	113.05	102.395	126.372	137.998
ANKS1A	696.554	676.955	655.352	431.373	441.053	402.384	479.696	358.03	348.868	273.656	249.618	216.023	202.119
ANKS1B	86.6839	84.4278	72.5901	5.3861	5.6951	4.95662	6.20987	5.78136	5.5595	26.471	34.216	6.68469	6.19621
ANKS3	50.1303	58.2698	52.9847	15.7964	15.2654	13.8048	15.2345	15.0011	16.278	23.2361	17.3115	16.6484	19.0977
ANKS4B	10.6909	8.4577	11.4188	3.64805	3.51979	4.00801	4.27864	4.48238	4.95757	4.58008	4.17935	4.02922	4.42519
ANKS6	39.6803	33.2291	31.7414	12.6654	14.5229	15.5292	14.5709	14.6124	15.5412	8.08036	8.31394	15.0336	13.253
ANKUB1	10.7645	12.3461	12.1243	4.56441	4.55842	4.90927	4.54008	5.21293	4.90487	4.73136	5.06008	5.03295	4.95151
ANKZF1	27.4164	22.1916	21.8022	68.7736	65.7433	45.5462	42.0029	37.7985	33.0346	41.3848	37.611	52.6786	44.1122
ANLN	1605.58	1545.68	1047.61	3148.93	3365.44	3993.41	3995.37	3445.6	2868.06	1383.75	1601.88	3573.62	3369.5
ANO1	10.9434	11.0307	11.0823	4.46786	4.56977	4.10577	4.09795	15.0225	19.5193	4.62263	4.1069	5.17055	4.32539
ANO10	424.709	482.808	598.597	401.835	400.583	366.613	337.743	194.393	188.968	192.124	179.107	354.711	363.205
ANO2	7.78377	7.90025	7.95569	3.99485	3.57697	4.17583	4.31162	3.36789	3.43083	3.7531	4.24407	4.07229	3.68058
ANO3	12.2316	12.5308	8.75136	5.39792	5.77829	11.2423	12.6384	6.34761	8.48225	3.70552	3.85279	3.66302	4.54412
ANO4	190.948	225.739	226.331	5.56805	4.88197	6.33107	6.1172	5.57297	5.84431	71.5532	108.124	4.65268	5.02725
ANO5	72.9796	43.595	66.1236	4.97621	4.36465	15.9802	16.3274	5.32565	8.75461	5.77197	8.51081	8.19342	7.00328
ANO6	1265.82	1141.64	1235.13	175.878	179.068	334.334	376.044	454.698	403.623	242.264	298.305	315.596	332.228
ANO7	9.37583	11.2095	14.3369	7.5328	7.81812	9.40619	7.20353	6.30259	5.97108	6.27916	5.94503	6.6805	10.2372
ANO8	23.9494	25.0082	16.7699	8.23731	6.45836	14.4217	16.6354	9.08351	8.67278	26.2169	19.0277	11.7717	14.2968
ANO9	9.83979	7.49407	9.05976	5.9134	5.33005	6.01052	8.3863	6.10486	7.26928	5.47823	7.06086	6.06231	6.05681
ANP32A	1323.88	1340.84	1039.06	1190.17	1335.07	655.63	468.109	742.802	698.077	461.388	472.597	552.908	515.513
ANP32A-IT1	15.9167	12.4607	12.1999	9.23397	9.53441	4.08164	5.71307	6.742	5.56473	5.30388	6.00418	6.33705	5.64041
ANP32B	4807.47	4408.26	3848.28	4507.59	4317.17	4584.26	4707.16	5324.64	5184.53	2008.63	2073.05	4395.31	4264.85
ANP32C	8.55144	7.8004	7.58267	3.60058	4.44581	4.03204	3.87402	3.85982	3.87768	4.06506	3.85311	3.86926	3.72618
ANP32D	22.4239	25.5295	22.6527	7.48551	6.09135	4.81255	5.69524	5.0823	4.8052	7.53239	4.8123	5.72007	5.67914
ANP32E	2268.92	2250.09	1721.54	1064.08	1141.25	1426.06	1504.57	1830.13	1574.59	888.744	1063.46	1527.17	1462.83
ANPEP	132.196	134.576	91.1035	11.2178	6.5556	4.58601	4.80353	4.46195	4.90849	4.20241	6.06508	345.414	320.173
ANTXR1	487.912	520.101	580.411	143.195	174.091	149.468	147.642	99.3194	102.827	105.682	109.976	383.682	386.919
ANTXR2	1110.5	992.267	830.786	36.7631	33.4747	95.0244	92.8903	73.1371	69.5021	97.7954	98.4219	310.119	309.634
ANXA1	3454.84	3405.12	3912.97	1644.88	1450.08	3459.08	3622.45	2989.42	2728.46	1508.82	1633.15	2810.92	2555.01
ANXA10	185.466	162.102	200.466	7.55304	5.80206	5.05584	4.45302	4.3376	4.98748	5.35901	6.25598	27.708	31.2751
ANXA11	1229.77	1172.8	1413.25	467.113	504.004	260.848	239.487	284.079	315.042	404.707	407.402	373.554	378.42
ANXA13	12.8904	11.8579	16.5374	3.70342	4.02706	4.49798	4.60112	4.61049	4.40758	4.06836	4.46547	5.61514	5.11537
ANXA2	13412	12394	13265.9	4820.11	4626.58	7673	7590.88	7961.99	8169.56	8071.57	8501.59	6552.91	6443.08
ANXA2P1	30.6328	29.7104	27.5823	10.2317	9.27586	18.913	15.5483	27.4734	20.2953	18.2723	23.4405	14.5095	15.8524
ANXA2P2	2798.88	2871.41	3241.83	1175.83	1126.29	2228.78	1980.43	2404.37	2352.74	2343.43	2292.74	1710.58	1867.79
ANXA2P3	36.3248	27.5557	56.0886	15.8847	16.2894	30.2385	36.0341	35.5708	40.8247	23.0931	25.7723	24.4439	28.6672
ANXA2R	21.6384	21.6713	19.4114	26.494	27.1788	31.4982	33.8068	19.9719	31.483	174.718	137.006	23.5922	23.1094
ANXA3	1370.89	1505.49	1917.57	8.08145	6.73453	1749.08	1754.39	5.98115	5.80812	5.99144	6.81839	13.6233	10.592
ANXA4	1375.8	1305.15	1550.78	380.99	534.851	872.789	878.266	490.281	561.155	609.742	664.766	993.15	1021.64
ANXA5	4811.92	5956.57	5801.69	2422.93	2737.44	2010.11	2152.02	1961.14	1960.61	2660.94	2736.9	3471.8	2987.14
ANXA6	623.773	606.112	605.666	253.454	258.808	313.928	301.97	80.0791	78.6951	86.8778	95.6154	444.234	572.644
ANXA7	1911.04	1916.43	2193.59	1092.18	1178.53	1282.54	1318.11	870.857	899.925	1050.42	1207.49	1100.85	1270.32
ANXA9	10.2026	9.30504	10.7587	5.6513	7.3871	6.21824	6.16603	5.58489	6.23775	5.65398	5.39994	5.43677	5.60502
AOAH	10.9003	10.3142	13.8129	9.29946	8.71227	13.9087	9.14652	11.3153	11.1111	11.4637	11.7286	11.9126	10.6882
AOC1	9.8911	11.0295	9.22416	4.84606	4.31861	5.15027	4.88985	5.19783	5.18754	5.12675	4.88395	4.59693	3.88701
AOC2	15.1032	12.3394	13.0626	15.2834	7.93712	5.59459	4.74993	6.43559	7.13114	6.49318	6.38669	5.74721	4.63474
AOC3	13.5493	9.05976	9.80424	10.1966	7.4376	5.34861	4.27892	5.40391	5.91753	5.89201	4.68364	5.36167	5.27036
AOC4P	9.64375	9.80313	9.7214	8.97395	7.35087	9.42045	7.19015	7.83688	8.74829	8.17435	8.23322	6.86391	9.85195
AOX1	57.4147	67.6191	88.5725	175.614	114.163	344.46	337.807	8.1382	7.97234	73.9668	90.6441	72.2313	44.1292
AOX2P	11.9039	11.1533	12.6237	5.80931	5.09526	5.48382	5.10947	5.02137	5.06029	4.99853	5.14662	6.08311	5.6122
AP000230.1	14.9893	15.7026	21.1578	6.51515	6.27199	6.67612	7.40867	6.57342	5.32895	5.45138	7.11301	5.65874	6.27747
AP000253.1	16.3846	12.3451	15.2318	6.22222	6.33025	4.68488	5.01128	6.5356	4.70461	5.92565	4.1306	6.2908	4.77582
AP000265.1	6.82747	8.09943	8.37527	4.23422	3.98605	4.58025	4.13271	3.64317	4.06989	3.70704	4.78385	4.24737	4.65086
AP000347.2	45.9024	42.055	35.0326	11.3671	10.2339	9.95652	10.5094	12.5264	11.3362	13.505	11.7824	9.75082	9.26438
AP000462.1	15.221	10.8224	12.8518	5.60091	4.34098	4.8298	5.45656	5.53605	5.11748	5.1756	5.22489	4.69927	4.28882
AP000473.8	8.49382	9.79383	7.40937	5.51054	4.43015	5.60598	5.76264	5.46785	4.47804	4.6382	5.5377	5.66154	5.47224
AP000525.9	36.6463	20.893	36.4408	166.665	179.038	591.028	615.503	112.543	167.627	53.3904	80.3828	5.76311	5.76724
AP000696.2	7.87887	10.5406	9.48901	6.32555	4.74426	5.21724	5.73963	5.65838	5.34953	4.5609	6.09018	5.40887	5.52352
AP001063.1	7.66065	9.82758	7.84252	4.22485	4.60217	4.59905	5.00911	4.60798	4.56825	4.10428	3.77685	4.74657	4.05657
AP001171.1	9.87796	12.6734	9.83073	9.61262	8.53448	6.81688	7.11658	7.99323	6.93611	9.15966	7.15384	7.25261	7.25999
AP001189.4	11.2692	11.2338	9.24594	5.76461	5.10544	6.66817	4.81743	5.63673	4.88342	5.22967	5.09543	6.11279	7.26715
AP001462.6	14.8421	13.0132	11.5134	17.0592	10.8115	7.10877	8.69014	12.5316	14.6887	6.39613	8.03499	8.84792	5.69879
AP001605.4	8.36023	8.79475	9.23527	3.74273	3.9979	3.78686	3.93556	3.97929	3.74495	4.17959	3.79327	4.36844	4.0965
AP001630.5	10.0292	10.2653	10.368	5.68431	6.63551	6.02021	5.70708	5.50907	5.3103	4.79908	5.85773	5.69174	5.22581
AP006216.10	8.80051	9.84842	9.97424	8.69141	11.8691	12.3406	11.5755	7.50027	9.94409	18.7848	16.5723	9.22838	7.77505
AP006222.2	61.1658	72.3792	64.7982	28.7991	25.6022	17.2716	13.3371	9.03402	8.58623	21.894	21.1632	18.5266	11.257
AP006547.3	12.2391	11.5939	11.1142	7.81972	7.54817	8.81159	10.2211	8.77799	9.63432	8.13085	7.46489	9.25363	9.73066
AP1AR	136.324	147.251	107.791	34.2743	28.6443	53.5365	56.7581	47.594	33.7016	26.2706	29.4348	62.2788	69.622
AP1B1	202.183	240.546	253.107	323.801	400.221	117.381	107.663	323.974	355.533	376.222	321.295	194.531	199.894
AP1G1	727.314	699.727	787.356	620.862	566.465	511.701	470.167	341.292	351.009	407.324	382.301	275.162	258.058
AP1G2	19.8363	21.3598	22.9299	222.841	229.053	23.8729	32.8435	64.0568	62.833	58.6273	53.5468	39.0684	39.0532
AP1M1	475.46	478.278	537.185	461.646	467.807	938.854	881.245	476.576	467.87	635.885	562.245	401.181	387.02
AP1M2	8.68073	10.344	11.5759	28.5908	17.6162	42.1345	30.0098	9.2625	7.62495	6.87694	6.69779	6.06838	6.44588
AP1S1	94.9314	105.899	113.493	322.402	472.852	167.611	107.046	266.62	265.991	83.4212	94.7361	333.066	431.651
AP1S2	2898.7	2610.4	3122.11	325.718	296.14	500.99	500.669	1049.82	1032.68	1688.49	1714.61	599.646	599.068
AP1S3	68.7305	66.96	85.57	9.72369	9.77769	28.8832	26.1002	53.7234	34.9801	12.3421	14.4533	8.0302	8.32811
AP2A1	17.3242	19.9356	19.4828	28.9176	37.365	78.3005	77.2656	25.9187	25.2177	67.2022	61.1212	39.3749	37.7938
AP2A2	216.458	233.999	263.136	179.087	180.251	325.238	319.213	178.83	186.749	274.088	263.086	237.753	261.332
AP2B1	784.256	816.465	843.9	830.622	850.291	708.495	661.431	456.137	475.527	387.854	421.438	310.906	376.394
AP2M1	5746.68	5265.31	6006.74	2676.66	2720.81	5274.32	5043.81	2674.34	2758.26	2549.22	2673.56	4781.02	4667.82
AP2S1	1990.3	1885.28	2202.28	2805.68	3017.42	4416.06	4264.25	2735.08	2905.74	2663.28	2568.21	3441.81	3575.15
AP3B1	381.895	410.419	333.619	329.108	348.558	590.455	588.442	397.349	457.193	477.47	508.291	316.979	297.121
AP3B2	11.375	15.9681	12.7842	5.06115	6.41415	7.33458	7.65191	11.3507	13.0189	7.04434	7.34543	18.8266	17.8169
AP3D1	874.074	832.383	898.727	353.934	390.819	602.609	632.288	289.588	323.98	431.432	457.235	349.255	371.146
AP3M1	523.267	468.922	530.572	229.763	229.627	330.799	339.338	296.926	285.342	299.26	331.1	241.923	246.79
AP3M2	320.704	285.893	283.231	59.3506	69.3235	47.6432	49.5466	80.6839	89.2445	106.685	102.694	187.888	184.051
AP3S1	5417.62	5557.87	5972.82	2019.52	2242.89	2683.17	2641.32	2540.88	2647.87	2745.82	2741.75	2551.76	2583.83
AP4B1	133.175	135.933	142.329	72.6138	73.8014	92.4415	84.1608	137.947	131.32	58.9375	62.233	120.161	127.199
AP4E1	189.565	184.697	223.909	68.4068	73.7526	81.9896	89.9922	75.9563	77.0777	99.8592	95.4391	50.0198	49.8411
AP4M1	118.757	144.479	171.837	159.784	152.492	103.717	88.2586	134.49	134.549	116.925	93.3161	211.201	211.955
AP4S1	136.304	153.038	137.398	63.332	62.7986	15.8783	19.3936	19.4136	18.3466	40.9943	45.9998	25.3439	25.5464
AP5B1	24.9402	29.3501	29.2488	7.85498	6.86303	9.82779	10.8948	12.6895	18.0563	6.62303	6.59932	7.18112	7.28466
AP5M1	464.934	497.756	521.957	83.0518	87.1816	138.45	126.935	117.166	109.162	140.274	148.319	138.963	143.704
AP5S1	82.3624	94.7236	103.275	201.648	159.267	179.991	185.276	151.048	157.792	277.063	211.458	129.606	163.009
APAF1	42.4766	49.6123	43.2427	40.7603	46.6865	17.7026	18.8572	22.2828	21.3763	16.9208	16.6	24.6341	28.836
APBA1	21.7018	25.5479	32.9442	8.15633	6.39353	16.9297	19.38	47.5587	37.5486	7.04861	5.89503	34.1553	47.6832
APBA2	324.846	250.055	362.173	25.5919	25.1795	59.519	45.6876	7.04834	9.52553	17.4174	19.6299	41.0221	50.1753
APBA3	162.728	161.238	146.665	46.407	46.1519	116.348	120.559	77.2411	69.8683	122.901	114.427	91.0352	90.985
APBB1	42.523	56.8118	57.678	9.822	8.00047	19.7164	17.0946	17.9991	15.2918	38.7005	38.4829	10.5825	11.0845
APBB1IP	24.0163	18.6134	34.0657	5.91522	6.6136	450.235	437.562	6.1509	5.96457	6.51093	5.57535	8.73114	6.98496
APBB2	483.049	481.6	510.051	65.3487	61.8669	224.455	215.278	57.2296	52.1285	37.9085	43.7366	54.148	55.6681
APC	258.463	287.485	262.185	115.274	121.484	160.199	164.357	310.978	260.771	181.465	233.565	100.617	97.7702
APC2	12.4397	17.0509	16.7864	12.1161	11.0083	13.1754	9.59793	8.94432	10.3799	10.9844	12.2879	8.68819	11.3534
APCDD1	29.7813	32.9118	36.7008	9.70149	4.27319	5.75411	6.42431	4.64896	5.93826	1379.65	1232.45	184.674	155.625
APCDD1L	367.278	465.872	260.749	24.4978	21.7394	40.9841	56.135	767.973	883.797	9.61157	13.8531	20.0623	17.1604
APCDD1L-AS1	17.8586	18.9482	14.4549	11.0943	16.7788	8.41062	11.1261	43.5635	35.7078	5.46811	5.52488	5.16391	5.58681
APCS	9.70074	7.70659	9.23113	5.47056	6.18165	5.50619	6.7403	5.4154	6.37294	6.07661	6.85545	6.79509	5.02144
APEH	272.157	290.905	275.099	445.377	483.352	382.684	388.802	292.032	340.95	266.652	243.399	232.322	224.323
APELA	12.1773	8.89498	8.24978	5.01447	4.22032	4.36901	3.90843	4.53085	5.04169	4.17184	4.35341	4.41898	4.69837
APEX1	3273.5	3375.16	3177.17	1951.51	1889.51	1776.47	1749.75	1795.39	1945.77	2693.77	2616.16	2246.71	2178.33
APEX2	72.3354	74.4212	70.2059	68.9817	67.6872	136.8	132.344	85.8857	86.4539	77.954	85.979	104.897	107.709
APH1A	85.0107	86.1727	76.4562	127.646	133.973	183.312	170.083	190.58	201.014	150.895	154.912	194.422	192.003
APH1B	124.303	138.599	122.551	33.1503	44.8237	57.9562	54.1515	31.1127	33.2607	30.0038	31.8813	51.5429	59.5722
API5	513.383	525.175	503.845	546.807	587.464	463.364	477.761	389.326	358.668	449.843	472.722	310.807	290.713
APIP	429.857	334.594	369.131	364.657	400.456	229.749	243.332	209.613	245.624	467.935	489.143	156.208	146.059
APLF	16.475	19.7223	18.3131	4.1004	4.31866	6.87845	8.12631	5.65436	6.80906	6.22312	6.92067	8.40389	10.8752
APLN	24.6474	21.1728	24.8257	28.2076	39.0804	16.7523	8.91401	8.87807	8.96566	6.69602	9.09787	25.7603	38.0794
APLNR	16.0158	13.6206	17.3895	5.67938	6.9908	6.11829	5.66389	5.72016	6.38496	6.68256	6.88397	6.18768	6.21225
APLP1	280.002	232.114	286.091	109.581	148.909	71.9398	91.4011	223.28	285.463	243.338	237.468	205.363	184.282
APLP2	1814.12	1853.71	1964.19	997.142	1054.86	1720.11	1712.15	1262.51	1404.18	1709.61	1722.64	1284.49	1280.86
APMAP	2925.73	2699.02	2682.48	940.899	944.847	1663.75	1757.97	2292.58	2046.34	2215.03	2049.34	1266.24	1180.14
APOA1	13.1753	11.4904	12.2897	7.05053	7.19084	8.06848	7.38999	7.15368	6.80171	7.77464	7.09357	8.68037	8.86832
APOA1BP	663.498	743.315	740.032	1150.81	1226.96	1118.18	1060.7	1095.81	1261.59	1630.08	1707.16	1204.77	1257.61
APOA2	7.61423	7.9757	7.04042	3.58399	4.14299	3.61612	3.34682	4.09585	3.75288	4.14872	4.44081	4.01136	4.17324
APOA4	20.7038	27.0248	25.0541	15.2671	14.642	16.1149	12.2846	11.913	15.3868	15.5436	13.3887	13.2318	14.8833
APOA5	13.0153	13.1545	11.7506	5.83593	6.70032	6.70403	7.05345	6.89869	6.28314	6.5846	6.45416	7.95389	7.08013
APOB	8.64189	10.3314	6.68678	4.93054	4.93879	4.17518	5.05591	3.96264	3.99051	4.52102	4.38748	4.14045	4.66909
APOBEC1	9.51063	8.7414	8.72732	4.99901	4.9478	4.908	4.31692	4.31534	3.93111	4.34179	4.86658	4.87673	4.19021
APOBEC2	9.92873	10.4947	9.56278	6.32586	6.37999	5.78139	5.19885	5.9664	6.21715	5.86949	5.94451	5.25931	5.86407
APOBEC3B	442.734	413.339	361.602	899.806	1061.74	512.727	537.291	2779.13	1878.95	1124.28	1257.4	890.681	811.652
APOBEC3C	139.081	104.104	126.845	498.304	570.52	266.515	197.493	599.3	646.676	611.782	679.104	528.344	667.326
APOBEC3D	26.2565	17.2934	19.663	5.05732	7.63831	7.79522	6.07657	5.4518	7.34731	7.43299	7.96974	6.28035	6.45652
APOBEC3F	17.8371	23.909	18.457	14.0597	12.0996	18.1261	16.3767	13.8602	14.494	20.6702	14.4393	18.7277	17.755
APOBEC3G	32.3294	26.8061	26.6487	126.051	175.845	23.7105	31.9	83.2319	104.52	284.122	336.184	94.2691	105.19
APOBEC4	8.14493	8.42129	8.26411	3.86993	3.90542	4.23272	4.35722	4.24936	4.09844	3.86146	5.03429	4.16299	4.64616
APOBR	8.60659	10.6444	9.61583	3.9308	5.29241	5.07687	5.11251	5.07458	4.58195	4.4385	5.84188	4.19878	5.11662
APOC1	155.971	128.7	147.083	13.8291	15.6458	9.27142	15.7031	20.166	22.8071	13.0156	13.1897	13.5518	15.2329
APOC2	13.4224	16.7667	13.507	6.85962	7.20302	9.82664	7.44189	6.44149	6.76651	6.83156	7.49339	6.83362	7.27561
APOC3	13.4458	15.2819	12.6841	7.07477	6.72981	6.63993	6.42891	6.38885	6.58036	6.38063	6.93684	6.05641	8.20576
APOD	8.76467	8.02232	14.8401	9.11572	6.23223	5.28366	8.11579	278.124	396.216	7.55149	7.0396	7.34527	6.04609
APOE	52.2667	38.0127	39.8673	40.0095	38.0706	52.388	32.3125	36.3903	65.4121	268.016	259.741	105.574	96.3243
APOF	9.09395	8.83475	8.65704	4.20722	4.16639	5.3285	4.10526	4.02948	3.95936	4.05736	4.48566	4.28309	4.71185
APOH	7.96701	10.0502	9.17177	4.13413	4.26877	4.65888	4.69128	4.5629	4.2401	3.6615	4.13495	5.53202	5.18187
APOL1	23.3772	23.0075	27.8114	69.5245	134.146	102.109	119.912	18.3682	24.0959	55.1255	38.7918	34.909	44.6316
APOL2	106.243	111.108	122.361	27.5697	29.6257	37.8562	39.1506	19.63	22.0506	45.24	43.5617	31.6206	31.1735
APOL3	37.6087	40.7143	39.6533	46.2116	39.7795	31.3113	37.3498	18.3006	15.0058	180.379	216.079	22.9956	27.9184
APOL4	12.8182	15.2174	14.2882	6.0491	6.92828	6.3568	6.75306	5.41863	6.44865	5.89849	5.82957	5.70225	6.23903
APOL5	7.2374	7.30281	8.26763	4.68299	5.6443	4.9131	5.58426	5.11492	4.35696	6.03944	5.02128	5.31908	5.45649
APOL6	23.6914	22.691	21.1083	45.9561	37.9649	9.33509	11.0119	12.8667	14.9354	82.1819	89.0617	27.2987	28.8099
APOLD1	404.892	341.726	423.93	15.4109	12.7004	41.3964	46.7419	88.3937	91.7416	140.733	111.136	86.0235	85.1463
APOM	22.1152	17.7726	18.3554	13.745	13.2779	14.6586	16.9166	14.9684	16.9082	26.4863	28.6655	19.3056	18.6033
APOO	382	353.745	348.329	538.437	551.295	958.988	779.629	389.119	491.474	978.015	1108.91	1098.55	1093.1
APOOL	291.442	305.615	451.952	253.697	259.788	172.736	162.592	159.434	151.155	171.521	190.914	169.935	171.967
APOPT1	234.715	241.399	236.938	246.267	223.318	119.156	118.415	147.582	133.039	143.264	131.099	177.932	169.535
APP	1310.19	1457.08	1503.96	295.94	378.864	509.822	489.05	575.497	459.712	550.586	682.957	584.952	590.845
APPBP2	728.879	733.292	761.415	206.943	226.844	182.826	189.126	226.016	241.188	214.37	221.831	225.54	229.982
APPL1	289.266	287.77	268.52	229.78	228.945	279.957	284.874	214.035	185.764	99.5487	120.295	209.698	206.358
APPL2	174.481	226.743	193.432	245.123	240.504	228.226	231.361	289.814	216.038	162.918	148.129	222.526	246.626
APRT	822.494	791.969	860.323	740.007	796.721	442.043	428.299	621.267	686.939	324.748	285.076	249.516	251.168
APTR	157.752	152.98	182.672	74.039	60.5365	34.9322	28.611	69.4207	70.5535	23.5642	24.076	86.5273	91.1715
APTX	232.096	182.043	182.865	189.837	194.516	207.381	178.528	259.806	265.515	101.099	95.9876	212.975	198.298
AQP1	9.91261	10.065	15.8661	5.18709	4.81417	6.09067	6.04262	5.22984	4.8584	4.75538	5.43387	8.55101	7.81466
AQP10	7.01983	6.14328	6.98828	3.81233	4.63932	5.0024	6.12057	4.80425	5.06737	4.60173	4.99605	5.24883	4.71765
AQP11	12.161	9.32612	12.3016	10.8382	8.05134	8.32404	7.83724	18.8912	29.2253	13.1698	11.306	10.0053	10.9601
AQP2	13.5438	14.3761	15.175	7.45013	7.88621	8.82944	7.97941	8.8666	9.05263	8.12008	7.9653	7.35911	9.69975
AQP3	45.6776	37.701	33.8712	12.9027	10.8079	7.51383	6.71092	13.186	20.3113	7.17834	6.98782	7.67003	7.68023
AQP4	8.78927	7.93681	9.88978	4.65257	4.03761	4.47359	3.87004	4.12774	4.09108	4.92339	5.97538	3.95074	3.98327
AQP4-AS1	8.2333	10.974	10.9917	4.08176	4.52459	4.27069	4.45874	4.16523	4.90971	4.71379	4.91275	4.06965	5.0029
AQP5	13.0551	9.84786	11.2332	3.99108	5.04721	4.92338	5.30935	4.86072	4.84	5.25664	5.24207	6.10496	6.33048
AQP6	14.9307	11.8022	13.332	6.37413	6.9996	7.30827	6.74633	7.70235	6.88641	7.07897	6.35791	6.60598	6.42061
AQP8	7.16994	8.9054	7.16458	4.24611	5.23306	5.46247	4.33734	4.6988	4.78173	4.833	5.34021	4.75592	5.4752
AQP9	10.8227	10.8323	10.977	4.03432	3.46476	5.09982	4.79235	3.99938	3.74013	3.79756	3.8621	6.68865	8.60597
AQPEP	11.3961	7.84006	7.02707	4.04984	3.53499	3.49588	4.23	3.91018	3.88708	3.97732	3.95546	3.88443	3.6531
AQR	242.742	230.552	190.033	120.986	114.969	154.293	148.909	140.686	160.139	84.5668	82.9637	118.083	109.234
AR	74.8087	63.4178	75.7451	124.672	116.859	4.74267	5.67461	5.38508	5.38796	165.499	182.711	46.1838	48.7445
ARAF	105.455	122.726	118.788	142.817	139.242	290.544	326.416	148.866	152.255	265.297	250.036	234.396	238.81
ARAP1	58.0757	50.9166	55.614	53.3614	66.5468	55.0541	69.8786	34.4002	34.5964	37.8288	36.1669	43.8316	41.4228
ARAP3	88.9115	81.4429	62.7385	111.501	138.609	62.7431	63.5053	316.982	297.137	29.1059	24.3593	39.7181	34.5474
ARC	37.7963	57.8121	47.4686	11.4698	7.90746	11.3777	8.32119	6.97058	8.57186	5.43977	9.08164	12.136	10.3647
ARCN1	3209	3406	3152.12	2274.03	2491.51	2020.9	2234.6	1519.96	1375.06	2030.74	2126.08	2158.39	1939.51
AREG	17.9462	19.3042	14.556	5.65571	5.92779	5.68032	5.57519	5.40592	5.52903	5.82787	5.18112	5.15485	5.37968
AREL1	139.147	136.471	137.487	138.533	140.809	65.3928	81.7811	115.035	105.373	119.734	119.565	77.9418	56.5854
ARF1	152.503	126.058	145.141	24.9872	27.1618	40.2448	50.7002	27.0412	34.0459	25.7146	24.9172	72.6873	65.8624
ARF3	1157.4	1092.54	1152.65	960.245	1007.16	827.405	716.475	1681.67	1796.86	692.065	665.084	926.857	979.836
ARF4	7926.11	8148.56	8448.12	3053.35	3248.33	4485.05	4717.31	2563.8	2410.59	2763.37	2821.16	5163.34	5031.76
ARF5	121.522	103.296	104.874	244.418	296.91	296.617	263.718	395.017	394.317	336.067	281.556	561.546	564.096
ARF6	2621.31	2675.82	2529.74	1036.02	1145.41	519.812	585.137	844.726	787.518	540.254	557.29	844.414	857.343
ARFGAP1	540.644	557.057	511.11	185.804	181.968	294.631	312.281	186.221	199.878	326.325	271.497	305.773	295.024
ARFGAP2	221.743	226.165	227.413	255.792	270.446	196.196	173.77	143.618	187.918	223.456	197.958	105.255	108.251
ARFGAP3	2356.1	2682.48	2405.55	501.76	525.831	587.223	632.176	914.954	757.515	965.426	1190.44	964.102	864.042
ARFGEF1	451.323	412.071	366.504	178.563	191.241	454.814	433.214	355.022	364.443	508.279	529.343	428.683	397.65
ARFGEF2	277.364	298.871	333.732	323.463	330.28	362.655	393.288	343.979	306.354	416.222	436.39	399.736	350.36
ARFIP1	1096.87	1197.51	1297.28	519.329	576.18	353.095	310.254	470.936	507.131	183.453	229.477	388.209	420.328
ARFIP2	250.312	184.684	244.705	658.358	751.385	671.821	671.638	460.815	496.681	461.549	458.73	529.876	495.951
ARFRP1	73.4458	63.9307	74.2457	116.987	125.577	195.437	178.755	165.627	165.676	211.825	203.725	166.874	171.085
ARG1	9.66582	8.92838	8.78518	4.86708	4.44573	4.94035	4.62404	4.81068	4.31286	4.56023	5.012	4.50618	4.58996
ARG2	64.2744	39.6591	74.7158	321.194	319.287	218.38	204.173	58.5065	63.3916	47.0021	51.1281	54.0901	56.3573
ARGLU1	942.219	1016.4	866.768	317.217	329.327	387.924	350.396	469.594	388.251	922.187	956.276	311.523	321.912
ARHGAP1	1247.72	1207.3	1252.8	387.436	413.19	471.471	444.513	379.64	397.884	374.056	353.482	501.547	512.224
ARHGAP10	100.086	119.804	115.146	29.4634	21.9248	21.8365	20.5944	19.1165	17.8562	16.887	13.0097	23.9351	17.484
ARHGAP11A	67.0142	76.4221	35.0655	81.1273	87.2202	67.3294	69.422	140.205	111.556	30.1596	31.5342	52.6918	39.0716
ARHGAP12	327.673	433.301	365.914	103.804	73.6966	210.518	228.293	624.739	610.28	257.976	304.806	219.339	212.174
ARHGAP17	488.581	443.922	422.276	331.097	373.053	573.208	589.065	277.954	254.215	390.117	303.11	361.509	361.66
ARHGAP18	1032.4	938.22	873.999	301.473	235.863	135.082	128.164	187.223	178.793	268.939	314.851	418.688	411.921
ARHGAP19	158.313	163.663	125.457	226.849	248.332	101.954	96.5085	132.806	145.05	125.523	139.528	75.1372	69.6689
ARHGAP20	11.8912	10.0672	11.9486	4.28576	5.28742	12.9683	16.2912	4.32507	4.70173	12.0215	10.8912	45.0046	37.4636
ARHGAP21	1291.7	1360.17	1185.09	126.057	98.0594	381.663	429.064	642.514	669.416	422.622	553.96	565.672	538.678
ARHGAP22	58.9964	61.6085	69.1001	3.66194	3.74431	5.50407	8.08081	5.56708	5.30058	5.24039	5.91095	15.5859	16.1189
ARHGAP22-IT1	7.65901	7.93838	8.77322	3.27571	3.55529	4.39964	4.05295	4.18547	3.8221	3.9592	3.93511	4.59841	4.11639
ARHGAP23	185.653	170.118	263.703	81.2822	87.0472	102.605	91.0765	21.3417	21.8637	41.2374	35.6595	59.2419	62.7938
ARHGAP24	120.798	102.961	98.5009	15.9781	15.254	84.6942	66.9034	20.6992	30.0386	23.6947	21.0255	132.716	112.19
ARHGAP25	8.87931	9.52957	9.10501	5.13284	5.271	5.25992	5.17733	4.88766	5.29273	5.36832	4.96053	4.98093	5.66977
ARHGAP26	16.3759	17.3035	13.3692	19.4794	19.1441	10.4381	10.0728	20.9699	22.856	121.353	146.25	20.4165	16.4313
ARHGAP26-AS1	12.4092	11.6379	10.4843	4.72508	5.07724	3.92988	6.34766	4.35471	4.57595	4.90858	5.26984	7.02907	6.23978
ARHGAP27	11.9952	13.259	13.75	11.1287	10.0378	13.4528	11.2007	6.7202	6.32434	7.46683	6.63977	7.1638	6.98846
ARHGAP28	61.4826	50.1047	38.174	74.7855	113.511	16.0998	15.4538	5.17361	6.12101	3.92215	4.12531	20.5038	21.7246
ARHGAP29	1198.14	1107.35	1372.28	236.084	182.316	558.481	575.804	270.059	236.812	577.125	642.295	270.75	256.995
ARHGAP30	22.8002	22.5342	24.5194	17.8385	15.0381	15.5506	14.402	11.5578	12.0797	13.4925	14.1957	13.6267	11.246
ARHGAP31	158.148	145.139	144.858	32.7784	40.9048	155.649	165.909	112.212	99.2215	104.937	108.196	107.503	99.2358
ARHGAP32	140.656	141.707	142.827	16.6412	22.2859	34.1207	46.1298	76.3088	68.8218	143.78	138.514	36.5233	46.8763
ARHGAP33	15.347	11.7713	12.5971	8.36155	11.425	14.1319	15.2841	9.38044	10.61	10.4884	9.87167	14.1097	10.1977
ARHGAP35	536.67	497.369	550.581	163.625	151.182	346.163	323.964	201.41	188.686	354.072	352.13	228.111	220.141
ARHGAP36	14.5041	12.3045	11.8089	3.592	2.73757	4.29312	3.52464	4.48442	4.30877	5.11539	4.14143	3.77408	3.67323
ARHGAP39	21.7769	23.7206	21.569	22.964	25.711	38.7915	39.1119	21.2957	25.7333	28.6495	39.4813	29.8147	30.8095
ARHGAP4	13.6253	16.1506	21.3658	8.2566	7.42236	6.47045	8.97772	6.04157	7.01994	7.85971	6.58648	8.69528	11.4449
ARHGAP42	53.6257	62.4391	43.8842	23.5545	25.545	14.3364	14.9186	6.0214	6.78706	29.3961	37.7195	61.9656	60.9371
ARHGAP44	19.3368	15.6188	16.5681	7.24156	7.81973	6.17301	6.60679	7.60278	9.07054	7.08061	7.15658	8.59026	6.61584
ARHGAP5	223.803	282.957	317.25	99.8954	119.069	87.8957	106.715	205.239	160.419	67.6467	84.2688	111.293	111.668
ARHGAP5-AS1	16.112	28.6606	37.779	26.2465	35.4289	12.5308	13.4436	34.66	44.3156	8.28487	8.07822	10.6068	16.973
ARHGAP6	21.4988	17.7414	29.7372	5.54001	5.40061	8.35327	13.4189	8.33317	9.13383	11.9077	13.3582	10.7828	9.21794
ARHGAP9	27.8799	24.0392	26.6266	13.302	15.4263	9.40355	7.73584	11.2658	9.8129	10.4553	9.32844	9.20949	10.364
ARHGDIA	312.058	290.425	273.387	468.553	436.627	670.915	601.295	646.93	636.647	482.879	403.622	389.665	386.951
ARHGDIB	939.454	838.68	422.787	158.857	138.791	206.936	225.213	7.22524	8.18233	7.99502	7.59395	72.5874	69.6503
ARHGDIG	27.0067	21.9642	27.0965	7.17201	6.13835	7.20224	7.17673	6.666	5.31514	8.31809	6.64962	6.23777	6.59064
ARHGEF1	66.3275	75.8597	72.5055	13.7646	13.8696	12.1302	10.7797	12.4873	10.3258	10.3294	9.59159	11.6427	11.5453
ARHGEF10	336.844	295.438	279.103	60.7658	51.1203	145.514	137.113	107.043	118.543	97.5096	109.601	219.47	201.037
ARHGEF10L	38.7704	37.1059	44.1697	7.32207	9.19812	20.6445	22.3492	9.32605	14.278	15.9793	17.3409	30.2983	25.5221
ARHGEF11	28.4175	32.7642	26.7968	22.8253	19.9087	57.3746	58.9623	89.8014	108.8	55.6022	44.4571	59.7627	64.2299
ARHGEF12	195.275	187.295	192.929	79.5395	90.296	64.6173	68.8871	61.6981	61.2963	97.568	102.386	64.0134	62.5958
ARHGEF15	12.8567	13.3547	15.8649	6.66827	6.78949	6.59178	6.91138	6.84971	6.44074	6.52403	6.76241	7.05761	6.49748
ARHGEF16	16.5823	17.9041	17.7857	6.9999	8.69941	9.60122	9.32074	10.3656	10.1233	6.48777	7.22576	9.24835	9.44614
ARHGEF17	49.5585	43.6891	44.1076	41.6143	69.1707	25.4044	27.0807	36.3812	42.8314	42.3437	31.6404	94.5344	134.46
ARHGEF18	839.993	794.44	944.127	763.688	702.539	1149.88	1083.82	562.894	512.128	1242.79	1165.52	473.809	489.319
ARHGEF19	21.9108	19.7829	25.0611	99.5199	71.8492	32.2168	23.7909	20.6295	18.1441	12.218	10.6558	45.2975	29.1103
ARHGEF2	185.193	213.318	263.095	91.9507	94.4771	137.571	141.644	187.119	191.187	108.033	90.9769	153.469	165.008
ARHGEF25	24.0577	27.0448	22.1449	12.3422	15.5853	16.9415	16.4449	13.8968	13.157	12.3832	10.4674	16.0957	12.013
ARHGEF26	103.113	117.522	113.385	32.7184	33.9388	89.8995	106.068	106.634	101.764	62.9157	69.5242	34.8804	24.6528
ARHGEF26-AS1	21.5992	31.8201	19.3208	5.94856	4.70136	5.02125	5.97429	5.0281	5.52699	4.45881	5.27777	4.93427	4.66207
ARHGEF28	61.292	58.5288	84.1166	75.3083	68.3487	67.7938	73.0788	61.3972	41.9203	43.7191	52.9921	22.0186	22.3242
ARHGEF3	432.552	435.693	441.41	94.1856	125.925	137.84	159.635	40.2704	27.4005	217.862	251.114	252.208	213.611
ARHGEF33	10.7045	8.19019	8.12857	5.14406	5.18597	5.64311	6.62099	5.401	6.16821	4.95131	4.57813	4.79726	4.51872
ARHGEF37	41.048	34.9593	70.4835	10.0853	10.3876	8.97817	7.31425	45.5912	48.9263	8.02796	8.79481	7.5735	8.33634
ARHGEF38	9.05166	11.3638	12.2158	3.7948	3.32749	4.49955	4.07728	3.82208	3.51024	3.17556	3.81233	4.01179	4.31386
ARHGEF39	9.5921	9.98333	11.0394	15.0839	17.6688	19.9459	25.0319	68.6957	71.0811	16.9549	16.1105	13.1835	12.0929
ARHGEF4	10.005	8.07755	8.65053	4.58362	3.56004	3.41465	4.95864	3.77105	3.61843	4.4231	4.16856	4.46964	4.46489
ARHGEF40	290.975	314.193	281.465	31.1327	37.6239	33.5491	33.8043	111.529	112.58	72.0161	78.9794	139.608	143.34
ARHGEF5	51.5617	29.4077	39.8202	18.5468	17.3886	18.1391	19.8897	5.14654	5.06158	6.012	5.75454	6.04549	5.91133
ARHGEF6	608.219	611.583	589.43	30.0115	48.5015	189.853	227.288	34.9073	40.7297	26.9569	22.3674	717.958	711.241
ARHGEF7	141.026	121.6	122.221	54.3136	57.7278	70.9741	62.9883	54.9987	61.1691	183.452	183.947	38.4084	43.8328
ARHGEF7-AS2	9.62731	9.54173	10.5362	4.0195	4.23089	3.82718	4.15952	4.30046	5.10535	4.57971	4.72944	4.38369	4.28436
ARHGEF7-IT1	7.47295	7.40164	6.61311	3.29999	3.5006	4.12054	3.49234	3.41297	3.34832	3.9541	3.67883	3.51	3.34839
ARHGEF9	78.9985	82.3115	83.4912	12.6136	15.3489	58.3825	46.014	126.78	153.078	33.9771	32.8733	63.2758	53.6284
ARID1A	427.089	375.456	387.203	663.01	600.695	518.744	605.973	473.641	439.377	422.506	401.487	534.982	552.214
ARID1B	213.436	236.67	223.43	20.9484	20.2785	52.1969	75.631	30.822	25.2231	82.7832	66.8672	50.8362	56.8672
ARID2	241.975	254.038	296.986	86.1416	72.6087	59.1421	72.5363	185.428	182.455	51.9464	67.3407	38.9638	47.9306
ARID3A	23.0917	23.536	24.3766	11.1287	14.8254	9.28019	11.4311	10.8376	10.7029	12.0209	12.2106	12.28	11.9578
ARID3B	22.2614	17.0057	16.089	9.99429	10.4158	11.1723	11.4525	7.19931	8.29559	8.82894	8.70786	6.39414	7.78157
ARID4A	104.279	157.55	136.906	33.2762	48.2261	25.6093	31.3661	57.0974	43.9164	54.3862	68.976	58.7243	61.6589
ARID4B	778.22	685.648	654.123	100.984	115.708	107.502	128.473	186.755	166.868	190.801	208.028	180.257	184.398
ARID5A	78.845	73.7127	80.6738	19.1417	27.4913	19.2825	16.9754	24.5355	25.3107	36.3178	31.4457	25.0417	21.3361
ARID5B	818.515	738.957	950.621	171.233	171.588	113.731	105.637	72.3572	75.9389	386.747	393.657	124.521	126.926
ARIH1	300.156	299.819	284.705	152.959	149.351	220.277	211.29	158.171	159.106	119.867	136.593	192.265	182.133
ARIH2	244.24	212.632	223.098	276.353	276.369	145.557	164.35	183.123	177.962	119.334	119.09	178.45	170.345
ARIH2OS	7.32831	10.8607	9.34118	5.48706	6.20079	5.67929	5.22046	6.4703	11.4469	7.95083	8.96281	7.32372	7.02926
ARL1	1356.97	1409.39	1503.78	468.128	451.336	548.25	526.785	321.559	326.54	301.078	342.133	520.77	483.362
ARL10	281.325	263.65	302.373	6.71481	6.54418	42.5167	39.7567	35.5234	40.9786	144.931	142.596	58.47	60.3488
ARL11	11.3409	8.49704	10.079	3.98054	4.08219	4.52539	5.1377	5.25695	4.4941	4.47927	3.44726	4.18575	4.86452
ARL13B	299.614	330.769	369.425	237.325	287.176	602.535	638.328	308.406	262.796	231.323	274.897	354.392	369.943
ARL14	11.9245	11.5513	10.4237	10.69	5.80587	5.57403	5.38233	3.83969	4.8109	5.21072	5.44113	4.78825	4.76303
ARL14EP	185.986	211.998	215.265	152.833	130.703	223.949	196.626	148.174	155.998	255.089	237.228	179.655	114.852
ARL15	253.358	265.756	370.67	90.8753	93.9689	119.221	110.294	179.507	211.082	227.499	274.525	55.5588	50.3092
ARL16	234.434	195.335	206.7	144.68	201.372	125.355	105.873	242.007	266.098	183.714	155.77	69.3529	76.6005
ARL2	163.468	176.556	174.266	674.102	749.918	608.24	567.602	729.123	843.001	654.146	572.246	234.545	236.847
ARL2BP	181.574	197.219	155.517	462.462	485.553	723.97	748.349	314.952	387.957	443.898	401.545	579.937	601.301
ARL3	834.288	774.829	761.976	533.698	549.546	294.778	285.371	288.03	332.331	460.686	496.648	429.566	436.824
ARL4A	793.654	647.163	719.442	415.876	344.515	691.298	748.974	438.566	374.972	790.993	689.946	822.81	759.524
ARL4C	1336.05	1236.26	1112.71	9.3491	9.04616	27.1218	26.0135	348.551	292.37	492.361	508.44	1331.17	1324.69
ARL4D	135.476	148.357	201.136	83.7536	70.4825	39.9848	40.2376	31.7793	28.6784	86.9332	71.5012	109.529	107.179
ARL5B	748.032	713.209	697.633	65.947	80.8761	129.23	131.872	162.966	144.59	190.302	205.093	165.201	165.774
ARL5C	8.10055	8.79217	8.56375	8.55793	6.20658	6.16707	7.09733	7.83442	6.0159	6.27566	6.54265	7.87354	7.30339
ARL6	73.4496	65.9443	113.31	27.9246	33.7677	70.5201	79.5723	61.7308	82.1965	23.2884	22.5254	39.1575	34.0311
ARL6IP1	4808.19	4408.51	3813.86	3221.52	3112.65	3664.71	3648.82	4780.15	4317.48	3048.9	3300.38	3693.89	3760.21
ARL6IP4	582.505	518.451	464.379	525.642	605.529	566.506	549.667	529.196	621.635	397.241	390.864	433.077	424.529
ARL6IP5	4133.04	4222.21	4659.3	1321.07	1416.88	1459.03	1394.29	1607.44	1612.19	1601.1	1721.64	2453.4	2506.71
ARL6IP6	535.128	631.972	494.689	446.022	469.338	367.613	381.363	438.476	365.575	244.008	286.315	365.543	388.448
ARL8A	91.5079	109.031	98.1705	40.5378	44.5451	134.294	156.053	112.838	89.871	167.256	174.865	175.6	148.602
ARL8B	2248.2	2382.41	2277.62	976.234	933.058	1246.81	1177.49	968.592	937.16	862.055	968.152	1613.56	1616.01
ARL9	87.6162	75.9952	58.9315	4.71268	5.16683	6.44664	5.91019	4.16621	4.37479	4.9865	6.49474	17.7232	18.6931
ARMC1	1610.75	1741.08	1482.48	884.53	901.29	1044.99	1106.48	1297.98	1058.2	897.646	995.529	1036.94	991.436
ARMC10	371.15	330.274	359.96	525.437	524.32	369.893	344.697	519.137	487.913	278.854	257.595	525.995	523.054
ARMC12	9.17036	10.2182	9.56711	4.65381	4.39465	4.42128	5.25994	6.7716	4.62504	5.04906	5.14698	5.29662	4.87898
ARMC2	13.7567	9.34586	10.5439	3.92369	5.0082	4.94365	4.69082	4.24968	5.27241	5.18003	6.15177	4.90575	5.18671
ARMC3	9.7211	7.96733	7.23296	3.64938	3.35924	3.44915	3.07007	4.28379	4.36323	3.66223	3.19	3.20204	3.14292
ARMC4	10.987	14.1245	12.6587	5.00752	5.32374	21.0296	18.2464	5.14623	4.70483	11.9713	18.7936	5.53459	5.84906
ARMC5	52.3286	36.4648	29.9677	24.1329	20.9265	34.8215	30.7571	30.4977	27.2396	24.6444	27.1307	20.6888	21.9311
ARMC6	110.708	110.43	104.283	90.2099	58.8245	270.505	268.248	66.786	63.3074	161.208	79.8367	70.8375	67.9755
ARMC7	58.021	61.9792	81.5835	47.9578	40.8091	40.9519	44.1933	50.07	53.7493	42.9912	45.7388	30.9484	30.5768
ARMC8	171.087	183.456	197.719	73.9729	74.7294	148.482	163.703	73.692	73.0633	70.6864	75.6013	90.8234	81.6479
ARMC9	103.987	106.365	112.457	55.5099	56.2484	128.254	106.994	70.8113	82.1794	42.2437	45.8392	209.49	183.3
ARMCX1	2880.19	2951	2928.71	89.5462	89.2057	1586.43	1675.73	530.853	474.411	1566.6	1686.39	2111.4	2314.48
ARMCX2	1176.43	1282.54	1360.39	300.634	354.174	433.684	429.204	113.647	110.612	629.207	698.42	1618.32	1543.43
ARMCX3	2430.88	2540.65	2829.06	324.971	381.105	649.185	700.45	384.169	332.919	937.256	1113.5	1497.15	1285.6
ARMCX4	61.0604	67.6234	54.9167	7.76892	5.89239	110.009	116.698	25.5136	22.2809	115.812	116.671	73.0703	62.6602
ARMCX5	130.026	146.215	166.983	172.201	165.542	206.669	190.67	78.0449	82.591	185.639	187.901	185.973	200.366
ARMCX6	1712.81	1673.88	1753.41	467.669	483.881	1071.11	1054.52	391.79	426.178	879.447	911.037	1346.94	1392.04
ARNT	49.3495	53.7182	50.3911	41.3023	40.193	38.4031	35.4809	50.8129	52.9543	54.381	59.295	95.9693	94.2514
ARNT2	471.567	468.651	356.231	98.3355	84.0965	74.8628	99.2141	90.1877	86.8783	196.738	195.397	132.467	126.347
ARNTL	340.264	331.774	236.607	166.627	175.684	135.961	113.652	103.416	96.069	316.268	338.193	110.103	104.126
ARNTL2	149.615	126.659	134.514	127.328	94.8039	81.7838	66.5055	82.5078	65.1789	55.2208	57.8764	39.7148	34.4005
ARNTL2-AS1	12.005	10.2555	9.252	4.77241	4.72839	3.79507	4.85132	4.99902	5.50459	4.87418	5.2159	4.56586	4.88941
ARPC1A	1637	1516.32	1505.49	2865.99	2932.11	1867.2	1819.81	3714.82	4129.63	2587.29	2490.86	4640.92	4483.71
ARPC1B	1315.05	1203.62	1048.56	960.146	1168.55	889.177	867.136	2246.71	2668.1	676.392	744.966	3108.52	3155.29
ARPC2	8858.25	8288.59	7235.34	3026.34	3065.21	2988.07	2972.32	3318.36	3168.37	3263.86	3436.15	5017.3	4806.11
ARPC3	5526.98	5195.27	5233.07	3921.38	4480.53	2571.78	2858.28	2782.6	2519.56	2616.88	2850.99	2963.04	2795.39
ARPC4	476.618	416.79	476.573	362.963	442.923	422.613	460.336	427.01	461.802	315.093	236.086	566.139	598.525
ARPC5	2189.97	2375.75	2353.87	699.298	752.646	1545.88	1463.99	1420.43	1385.22	1370.52	1450.97	1595.49	1544.32
ARPC5L	1160.1	1079.09	1163.99	987.033	930.362	705.315	731.341	805.697	849.59	401.405	402.23	934.395	925.095
ARPIN	71.9273	70.2998	66.6794	14.5697	13.0644	55.6358	44.8006	35.2348	39.9945	13.6674	15.4104	26.7633	30.5985
ARPP19	1462.71	1341.79	1482.66	586.308	586.237	990.718	994.672	1126.84	975.365	725.805	743.399	626.089	621.145
ARPP21	14.2122	12.7847	26.0546	5.01814	5.14648	5.18531	5.0065	4.92885	5.31105	5.31059	5.20915	4.96129	5.12268
ARR3	11.0539	16.0981	10.2811	6.52405	5.4249	4.96542	5.16102	7.87029	6.43842	5.33954	7.5164	7.10398	7.77144
ARRB1	63.4024	56.881	68.4739	94.8008	120.943	27.1643	25.4472	10.9803	10.5453	9.7486	9.68747	22.3386	21.4665
ARRB2	20.9708	26.4042	23.0439	107.664	115.137	64.3376	66.5441	142.804	120.844	190.389	161.114	22.6753	22.3377
ARRDC1	23.4692	26.1171	30.7823	12.3423	15.889	56.2947	69.6181	11.1612	13.2641	15.8268	17.5461	9.71007	10.2325
ARRDC2	120.809	97.9417	72.4054	38.4194	38.77	53.9406	55.8009	36.1982	38.5215	178.79	133.755	38.153	46.1941
ARRDC3	587.431	705.249	721.051	126.179	143.291	170.049	176.304	260.738	175.521	572.353	735.802	270.638	277.364
ARRDC3-AS1	11.6725	11.1003	12.1731	6.60261	6.48327	10.9593	10.6448	7.70675	9.35813	8.72697	10.1751	8.00183	9.09211
ARRDC4	537.107	603.765	1197.86	44.5055	48.0232	27.1669	21.2635	18.7908	13.724	6.95821	7.38288	235.15	212.147
ARSA	17.9361	17.7445	18.2388	8.76116	8.03961	9.50014	7.4379	8.3507	9.74795	12.3558	13.5248	9.64974	9.58404
ARSB	47.3396	73.7252	85.4552	11.9039	12.7964	7.44041	9.86258	20.6827	17.3753	12.6252	16.1584	14.6687	11.256
ARSD	85.652	78.1028	84.9326	21.0432	23.9108	29.2293	24.7557	15.3367	17.4713	44.0461	46.2173	73.6277	68.8813
ARSE	27.6452	22.0999	21.3252	9.28175	9.24427	7.68411	7.37412	76.445	106.53	75.2388	69.6136	68.5304	85.6773
ARSF	11.6213	10.7634	10.5858	5.07132	6.01595	7.12103	6.63275	5.44812	4.62508	5.83935	5.83979	5.27461	5.6461
ARSG	22.1936	16.2641	21.1777	7.00809	7.88984	6.51059	7.36914	8.45027	6.98612	6.70643	6.06478	7.56923	6.61982
ARSI	17.7493	24.066	26.4241	5.73033	5.31917	111.505	86.2003	5.71779	4.86891	32.3357	28.8763	39.2341	53.8177
ARSJ	727.865	642.963	766.014	142.591	165.867	69.7973	78.4621	290.196	187.298	146.98	188.553	135.215	164.156
ARSK	152.197	123.537	100.992	26.3923	29.482	66.0791	53.5879	64.7908	70.5259	53.822	72.1531	47.3584	52.4003
ART1	10.3963	10.064	10.1852	5.53845	5.57733	5.1396	5.39511	4.77666	4.97696	5.03578	5.1151	5.39961	5.10382
ART3	8.28113	8.6003	9.24979	3.85653	4.57729	4.85634	4.31848	4.86359	4.05394	8.64507	6.88741	4.01331	4.04709
ART4	9.66144	8.04778	7.94545	3.96805	4.33259	5.20959	5.11307	4.21987	5.85218	5.19764	5.09889	4.37145	4.5322
ART5	12.5769	13.9392	19.8134	8.33231	7.11174	6.79365	7.26024	6.55197	4.9848	5.6175	7.38704	6.22182	7.32285
ARTN	13.306	13.7984	12.7349	6.67495	6.79977	9.17972	8.41705	6.73391	6.63722	7.30588	6.95535	8.37751	8.87127
ARV1	334.451	228.256	381.992	216.691	223.675	250.961	252.099	379.382	416.761	355.465	368.79	390.862	378.229
ARVCF	21.0098	20.0587	21.7408	11.3679	10.5746	12.9082	13.584	11.4826	11.2774	13.0642	12.8619	11.8146	13.1477
ARX	234.969	247.969	176.826	5.43155	5.51817	6.15267	6.19945	5.4175	6.25202	109.777	124.066	6.53697	6.17553
AS3MT	49.6966	52.0454	55.093	11.1262	10.9701	71.5278	70.5036	13.4248	15.248	159.952	130.242	105.841	93.4549
ASAH1	1551.76	1445.02	1918.51	287.553	317.321	545.504	534.864	524.202	535.099	1262.23	1419.61	1286.28	1306.7
ASAH2B	55.0109	40.3322	39.5328	53.2073	62.7461	49.5374	53.6154	59.7783	53.1455	24.4135	26.3954	50.3919	47.1101
ASAP1	1023.04	950.254	1055.62	530.656	468.084	751.085	819.489	405.097	397.238	736.13	731.839	1012.86	1018.66
ASAP1-IT1	24.9627	20.4177	29.0552	3.86257	4.80844	3.80108	5.09991	4.14191	3.79364	3.65964	5.16495	4.63811	4.19803
ASAP1-IT2	25.0847	26.0834	30.1403	7.33232	10.0846	7.25817	9.86328	7.66625	6.97966	7.39383	11.3475	9.66979	8.28642
ASAP2	2384.77	2383.07	2216.01	538.518	503.097	333.313	425.829	665.288	678.189	331.289	414.143	580.131	455.791
ASAP3	65.4499	63.782	72.1175	53.4429	53.6978	32.6422	36.5227	31.0489	36.3159	65.1029	55.8078	140.686	135.304
ASB1	111.136	117.35	117.064	18.5541	21.5857	24.486	22.702	43.1886	41.058	72.5646	70.3035	36.2239	31.2323
ASB10	6.83584	7.48155	8.51126	4.42724	4.33768	4.27919	4.66008	4.63556	4.06501	4.55585	4.36196	4.61659	4.66999
ASB11	9.00408	10.8093	12.3349	4.23662	4.5814	5.36213	4.7884	4.40688	4.44163	5.38742	4.61849	4.48726	4.69905
ASB12	17.6292	17.6599	22.8962	6.1242	6.95155	9.70025	10.3634	6.43542	5.96094	9.44424	7.79178	7.90459	8.59502
ASB13	230.849	238.365	180.272	58.8231	57.5275	54.0744	41.7258	165.682	157.717	51.0022	61.3636	62.1721	65.9712
ASB14	8.36511	9.08716	10.2468	4.00024	4.07098	3.67055	4.95264	4.86214	4.60828	4.21563	4.97216	4.63479	4.25043
ASB15	10.1482	11.2324	10.3625	4.61397	5.03902	4.16934	4.4201	4.297	4.9758	4.31956	4.5905	5.84443	4.58415
ASB16	11.8271	13.4453	13.4909	4.63862	4.36474	4.3727	5.24444	5.86742	4.64274	4.96089	5.57989	4.58253	5.78726
ASB16-AS1	12.5733	12.5787	14.7177	51.677	61.326	38.8885	42.4835	23.3594	25.057	33.3332	23.6381	15.5588	16.763
ASB17	8.46656	7.19217	7.75657	3.41634	3.37094	3.61098	3.09811	2.94651	3.54163	4.20887	3.58906	3.6885	3.68965
ASB2	10.3683	11.7143	13.5458	4.56577	5.66448	5.22165	5.16582	5.54462	5.75065	4.86357	5.45895	5.66854	5.74792
ASB4	9.99463	10.8666	9.47241	4.72026	4.70018	4.72021	4.69771	4.44735	4.69659	4.74091	4.70518	4.47497	4.64977
ASB5	61.0688	91.9123	26.1042	540.615	702.597	5.58011	4.94877	4.01542	4.10539	4.4581	5.54988	4.37718	5.55763
ASB6	99.9477	111.242	126.039	63.1706	67.3692	70.0771	55.7628	85.7388	102.558	56.0255	46.3997	110.771	112.391
ASB7	152.401	168.056	188.117	114.045	103.282	112.067	117.221	79.0719	87.6519	30.8717	28.9315	72.023	66.3555
ASB8	294.604	271.158	339.37	146.76	174.673	120.31	138.754	281.545	259.575	180.884	171.911	148.231	155.536
ASB9	9.76097	13.8201	13.0556	15.8757	17.109	8.85961	7.74485	166.908	187.478	28.2288	46.0714	71.112	52.2828
ASCC1	333.488	290.273	345.73	500.085	466.213	238.101	208.495	283.231	292.447	446.405	424.324	353.205	359.923
ASCC2	333.805	271.041	312.465	443.737	451.025	272.473	276.121	181.83	184.22	472.866	440.44	257.218	245.681
ASCC3	599.648	681.715	651.502	282.829	298.376	317.296	361.273	220.028	206.298	456.263	485.52	309.251	314.801
ASCL1	12.1807	14.7687	12.3962	4.68438	4.91816	5.30944	4.52286	5.44951	4.94869	5.3111	5.12752	4.77042	4.88576
ASCL2	8.46103	8.73175	9.60045	4.12356	5.11248	5.07481	5.08637	4.49919	4.36644	4.55246	4.78066	4.2893	4.51811
ASCL3	6.54666	6.93953	8.90384	3.56445	4.04752	4.27675	3.7633	4.12308	3.4549	3.73097	3.97636	4.22982	3.65088
ASCL5	8.33567	9.88816	9.2136	3.38222	3.68849	4.18984	3.74357	4.0836	3.61028	3.71747	3.74484	3.53713	3.19695
ASF1A	1011.97	992.571	989.646	625.611	642.415	745.164	705.447	558.868	545.389	506.731	558.132	441.377	462.549
ASF1B	41.5889	38.9186	18.8259	429.207	409.354	755.087	746.479	501.464	399.595	409.178	337.238	248.11	310.169
ASGR1	9.48435	8.13989	8.87201	4.49894	4.23771	4.9556	3.96856	4.36247	4.00671	3.27077	5.06267	4.4093	4.01343
ASGR2	12.9178	11.3726	12.1667	5.68256	5.51027	5.36659	6.11993	6.09252	6.3649	4.94649	5.59601	5.81936	6.37754
ASH1L	677.821	682.687	666.151	231.883	232.468	253.217	277.956	310.736	352.911	329.129	424.937	396.819	397.804
ASH1L-AS1	260.876	306.173	262.16	104.327	110.463	76.7357	64.8492	90.0485	126.572	122.624	110.704	59.612	57.2021
ASH2L	2080.95	1938.96	1750.14	871.827	827.003	593.019	578.57	737.841	899.423	1097.17	1070.68	801.266	837.198
ASIC1	21.6571	15.9807	20.3064	9.32348	8.86618	7.90572	9.18277	13.6145	11.3791	10.3171	8.33186	10.8203	10.9537
ASIC2	10.6904	10.6751	9.47937	6.60175	6.28666	7.42802	6.31182	7.30056	6.15315	6.6736	5.87341	7.00404	6.33854
ASIC4	21.8751	17.1971	18.2108	6.64452	7.4438	9.69282	8.51748	7.00873	8.52976	6.88768	6.76111	7.22839	7.93084
ASIC5	7.81718	7.84654	8.44845	4.24336	3.82001	3.60091	4.21333	4.48684	3.59371	4.57122	3.85896	3.70583	3.66142
ASIP	9.7281	7.95389	9.76041	3.63972	4.49981	4.11707	4.52142	4.13342	4.68636	4.71602	4.53311	4.83313	4.37954
ASL	410.889	381.469	364.373	636.165	678.119	752.327	706.939	455.323	615.547	568.339	572.891	1133.61	1043.44
ASMT	9.80807	9.39701	10.0682	5.33377	4.49458	5.33144	4.35974	5.31902	6.67001	5.26165	4.64181	4.62006	5.36706
ASMTL	638.008	640.726	584.509	37.0052	40.3028	67.1994	72.5575	15.0948	13.2276	163.569	154.051	97.5348	100.66
ASMTL-AS1	15.8799	14.992	18.4679	5.85036	5.64181	6.31457	6.37853	6.85474	6.07388	5.68303	6.45258	6.63991	6.07582
ASNA1	697.659	629.184	648.292	505.65	456.957	1067.52	967.822	765.109	844.315	1087.74	986.994	813.151	834.753
ASNS	2270.11	2224.64	1998.06	132.577	150.033	266.29	286.03	804.307	824.533	363.51	400.415	646.274	652.394
ASNSD1	2583.58	2354.57	2196.96	745.721	704.5	645.199	650.693	997.93	913.154	869.567	912.267	891.931	817.042
ASPA	12.5215	12.3919	9.87952	4.13377	4.44616	3.64916	4.02297	6.26004	6.92251	5.63717	6.267	4.02708	4.4688
ASPDH	44.2199	41.2039	42.1926	10.3645	9.19091	10.1081	10.0917	11.578	11.5918	10.3235	10.6384	10.3872	10.9829
ASPG	8.61017	8.97294	9.31258	4.20285	5.14029	5.75075	4.64905	5.55073	5.03723	5.46926	5.17187	5.55702	5.14838
ASPH	805.092	886.286	886.386	477.894	487.774	305.23	327.672	349.675	297.445	366.938	398.782	612.032	592.158
ASPHD1	26.4434	39.6659	33.7704	11.2379	15.0879	62.0433	52.833	58.0802	49.767	62.3244	53.834	162.062	163.87
ASPHD2	207.445	192.241	201.229	5.09757	8.20634	5.88866	6.20178	48.8912	54.6086	27.163	22.6191	15.2161	13.9474
ASPM	396.135	333.99	237.402	426.148	427.069	679.281	699.917	947.829	927.212	412.746	462.84	719.923	714.732
ASPN	20.5047	10.4819	70.8624	4.60791	3.94278	3.89111	3.64763	3.9613	3.99533	4.78126	4.62379	6.67169	5.92946
ASPRV1	11.0862	15.5234	12.211	5.78786	6.91511	6.54846	6.14321	6.2157	6.55169	8.09638	8.15057	8.63342	9.87428
ASPSCR1	58.6653	61.0104	52.5385	119.435	119.456	175.78	166.056	163.761	154.749	170.075	174.345	50.2152	71.001
ASRGL1	143.874	98.7706	78.7019	165.585	164.449	309.597	305.973	66.3057	55.2505	80.0699	79.9241	10.1429	9.68434
ASS1	341.785	398.593	773.98	194.571	268.329	568.393	578.186	4.5003	4.16724	50.2698	47.8396	699.087	763.192
ASTE1	108.082	118.999	94.5163	84.1667	71.278	51.4638	50.5181	29.6222	42.6151	70.0204	88.532	94.7973	87.9369
ASTN1	25.9341	41.3716	20.6057	3.17677	3.52517	3.99022	3.86338	3.66299	4.78049	86.3427	107.933	4.39916	2.95695
ASTN2	50.0634	52.9401	51.0113	15.4807	14.5132	13.3723	12.801	46.0021	38.4891	37.8614	36.4446	23.1785	18.3261
ASUN	2549.01	2511.99	2802.13	1001.58	1046.25	712.011	686.816	1340.17	1139.06	435.744	497.484	943.792	949.579
ASXL1	208.862	215.036	184.003	427.301	405.919	447.827	457.855	418.176	410.928	396.297	370.866	217.726	229.346
ASXL2	121.063	128.596	132.327	177.883	171.251	146.927	135.318	179.808	165.017	140.78	154.39	194.147	187.745
ASXL3	19.4676	25.0076	18.5996	4.3468	4.42095	4.8719	4.5195	4.28811	4.65251	5.11406	5.58762	6.52815	6.1021
ASZ1	9.20674	10.931	9.8149	4.38981	5.27193	4.28997	4.37937	4.91354	5.44917	5.55178	5.31608	4.37724	4.47175
ATAD1	1012.41	974.966	1083.81	436.704	545.164	279.226	294.003	495.739	503.818	349.834	409.363	336.757	296.399
ATAD2	268.218	264.488	193.781	497.862	514.412	694.852	694.143	764.051	593.494	344.013	423.954	379.711	372.497
ATAD2B	123.72	147.623	106.319	38.3482	39.7345	14.0444	15.4374	35.0566	32.2504	25.4154	30.4656	29.8519	27.3399
ATAD3A	147.77	137.409	138.108	205.874	219.722	176.969	165.846	163.583	171.865	138.748	145.496	327.746	337.092
ATAD3B	113.524	124.821	87.1501	130.305	105.038	64.7252	69.6724	76.8689	61.9181	63.5106	46.7666	134.202	107.525
ATAD3C	18.6635	16.9474	19.9163	13.2362	11.4549	12.3102	10.1545	8.92747	8.74014	9.58029	9.40782	10.8955	10.9487
ATAD5	55.1918	53.7011	53.2717	57.913	103.502	29.0249	23.8387	46.559	52.8614	24.1717	27.8974	22.5254	18.5672
ATAT1	45.8207	32.6501	42.8712	20.4705	28.6857	20.6357	22.1592	16.7877	21.5543	27.3699	23.3131	24.2884	17.8575
ATCAY	132.267	152.611	135.74	16.9918	16.4654	23.2358	19.5241	17.78	19.5835	23.6223	18.6387	20.4896	22.4233
ATE1	36.8841	62.5012	49.8967	68.1086	63.0928	37.4203	35.4701	30.8847	26.9345	28.4786	29.6082	22.1636	22.452
ATF1	724.004	730.165	784.933	520.687	497.349	317.355	302.635	492.442	456.478	253.22	304.098	335.809	312.05
ATF2	588.069	584.314	629.863	173.708	184.793	185.511	186.751	282.041	232.759	227.067	283.277	315.464	312.99
ATF3	128.694	130.223	126.102	15.247	9.08777	48.8522	63.229	108.664	120.237	134.375	116.09	30.4777	34.401
ATF4	6384.87	6545.13	6206.79	2143.5	2306.81	1723.47	1787.69	4051.64	4176.41	2520.68	2605.57	3078.26	2907.73
ATF5	29.217	26.4956	26.7225	44.8111	34.2234	74.8529	84.2084	42.8367	36.8258	43.5404	41.1163	49.485	43.2064
ATF6	365.39	357.193	412.141	64.7799	65.9769	164.056	167.82	180.122	174.57	161.288	164.548	175.061	183.3
ATF6B	16.7612	15.4963	15.4767	14.5328	13.1909	12.8387	9.11045	10.1342	10.0954	9.81138	9.51075	8.34566	7.63836
ATF7	47.5709	46.2955	43.1122	95.402	114.817	49.9645	60.4136	136.258	147.664	63.6839	67.5272	73.8188	73.1482
ATF7IP	612.813	706.669	684.371	224.232	234.3	211.539	209.521	207.345	203.469	179.841	181.525	262.851	240.864
ATF7IP2	107.54	82.9259	102.482	6.19801	5.84222	5.54015	5.03408	8.16248	10.1112	5.82125	5.78717	6.23361	6.20553
ATG10	47.9689	43.8975	46.06	62.3593	65.9072	22.4898	28.926	56.8844	78.0999	20.4257	26.9567	33.9241	32.1162
ATG101	922.7	771.586	905.405	498.528	503.353	564.218	534.893	898.358	1049.91	347.816	289.824	586.949	556.502
ATG12	1319.98	1333.43	1215.29	543.919	482.905	569.435	595.386	604.53	634.412	471.387	554.499	467.959	454.039
ATG13	180.139	217.691	206.018	207.677	201.402	332.077	291.483	154.927	176.612	202.152	203.172	171.719	152.894
ATG14	281.855	260.392	277.448	79.2438	85.1039	90.751	56.5392	114.515	116.591	203.133	218.609	112.387	84.1112
ATG16L1	37.6538	32.6015	37.9114	21.6268	28.4727	14.744	14.0349	21.4429	25.7022	20.947	21.1252	20.1256	17.9622
ATG16L2	14.8931	16.0257	10.1385	6.59527	7.55766	8.92633	11.5837	7.1039	7.81656	5.93255	6.93303	6.86859	5.25507
ATG2A	50.1547	54.7417	62.3067	144.601	112.819	125.377	133.801	113.834	166.542	154.907	125.031	67.6137	90.48
ATG2B	232.471	260.303	259.827	55.075	48.6595	33.4655	35.1715	49.2655	53.4972	55.4915	69.9712	46.6851	44.537
ATG3	914.706	832.343	815.676	782.487	872.546	1218.35	1319.61	1009.33	932.9	872.15	941.086	1224.34	1172.27
ATG4A	306.291	261.92	390.745	177.483	174.633	248.194	226.844	135.844	153.286	591.092	555.537	173.399	169.781
ATG4B	337.839	361.911	333.704	128.47	121.058	219.459	204.117	197.101	219.338	393.824	377.189	324.61	292.591
ATG4C	224.793	299.614	273.738	62.0256	59.3342	118.641	97.1678	135.044	126.272	42.5389	58.9724	143.632	122.109
ATG4D	35.7419	42.9604	35.6165	30.0658	28.6647	47.2887	54.5523	45.6672	37.4597	47.6844	46.0033	29.5141	26.8922
ATG5	265.332	278.453	258.326	392.396	380.006	661.445	666.1	321.18	321.583	433.404	458.114	467.912	436.26
ATG7	123.002	115.482	118.64	82.2144	66.7315	52.0014	44.1392	47.3149	55.522	55.2949	54.0688	61.098	60.288
ATG9A	333.604	303.679	355.294	146.178	169.592	134.269	189.36	170.149	171.927	249.325	210.285	249.876	227.422
ATG9B	8.39236	9.70319	10.0182	4.61639	4.59023	4.89145	4.64238	4.7441	5.2583	4.66413	5.09207	4.51614	4.53509
ATHL1	15.9311	22.9671	25.2709	14.5808	15.504	25.7715	25.6948	16.1223	14.2877	13.4753	15.9762	15.9769	18.9618
ATIC	1613.08	1437.67	1355.37	1421.18	1233.8	943.476	925.26	1808.5	1606.22	1528.08	1443.11	1234.58	1066.01
ATL1	314.955	314.479	401.558	63.4451	42.6599	89.9983	106.478	316.972	336.17	613.386	642.016	321.409	324.844
ATL2	159.526	129.828	130.238	493.57	484.983	318.231	282.079	524.853	491.094	248.205	275.972	408.671	379.243
ATL3	730.718	689.894	739.75	708.551	634.004	859.054	828.267	891.284	843.771	504.313	508.556	590.016	600.858
ATM	195.325	217.856	205.725	99.4158	110.941	47.8605	48.303	18.0673	22.2538	67.249	67.0277	39.8813	34.4743
ATMIN	607.04	685.811	673.489	676.958	648.927	367.389	344.891	375.673	364.866	310.901	332.154	209.218	175.465
ATN1	13.5976	14.4578	14.445	15.6186	18.9827	15.9347	17.2467	19.0742	18.8505	12.9786	15.9626	18.2756	16.1824
ATOH1	7.89382	9.08546	9.61176	5.47807	4.76174	4.17767	5.5648	4.53801	5.45336	4.65355	4.39229	3.97532	4.49388
ATOH7	9.13781	7.99229	9.67328	4.60136	4.42327	5.62449	4.89568	7.33157	4.82889	4.59965	5.65767	4.87971	4.8449
ATOH8	48.0923	57.038	48.208	9.22126	12.9362	14.4603	15.9161	36.4937	30.5157	34.6819	41.8714	33.9876	28.9119
ATOX1	889.894	800.576	900.606	592.073	525.21	587.332	622.889	1485.55	1447.66	1043.24	1018.59	713.378	746.989
ATP10A	34.2094	38.376	45.0851	7.29259	6.29757	6.54179	9.08599	7.10236	6.24803	7.08825	6.4506	9.04082	11.1645
ATP10B	15.2447	13.9425	20.3855	5.61493	6.06165	6.3164	6.7644	9.40971	13.1193	5.0392	5.52149	7.21425	5.74478
ATP10D	1608.34	1776.29	2090.19	453.324	460.393	242.142	270.358	54.9226	72.6215	123.419	173.594	605.336	566.357
ATP11A	272.138	278.498	282.033	53.4764	64.4247	13.5667	12.5956	4.50798	5.62208	80.7694	94.9546	50.9501	50.8418
ATP11A-AS1	7.48464	8.708	7.96712	4.84129	4.54866	4.77692	4.91458	5.16474	5.0451	4.5058	4.30893	5.57319	4.38379
ATP11B	281.724	326.401	292.312	106.366	98.868	237.043	262.272	161.777	145.367	112.496	105.32	108.767	106.65
ATP11C	512.448	533.045	524.659	59.9463	84.7625	371.44	387.969	130.861	81.1518	255.26	283.109	273.546	280.938
ATP12A	7.83089	7.19736	6.81527	4.39908	4.21586	4.01304	4.07356	4.26167	3.82943	3.91823	5.53505	4.42563	5.04798
ATP13A1	361.948	347.344	407.557	316.089	335.153	370.578	305.48	343.172	330.182	383.98	327.341	276.746	247.669
ATP13A2	121.477	120.574	162.868	61.6129	74.4351	49.3832	60.8288	42.7769	50.3706	81.3697	76.8795	58.7156	47.1127
ATP13A3	1229.26	1219.69	1175.8	348.322	366.009	805.842	830.276	462.797	388.792	482.687	569.832	453.185	427.98
ATP13A4	9.41658	12.5859	13.6197	5.36279	5.68677	5.14604	4.78401	4.79613	3.94172	5.16013	5.67891	5.03804	5.03737
ATP13A4-AS1	13.2982	9.06375	14.667	5.48927	4.57903	4.67873	4.54554	5.52155	4.76606	4.94101	4.2645	5.03865	4.60868
ATP13A5	22.3312	19.463	21.104	5.15509	5.05654	4.92602	4.79994	5.72912	4.12111	4.98359	4.69686	5.35564	4.65062
ATP1A1	1861.84	1787.04	1546.97	802.055	768.064	1453.56	1517.68	4038.89	3608.73	2044.3	2160.11	2234.81	2157.78
ATP1A1-AS1	12.6215	12.4882	12.3362	10.9181	8.36496	6.74952	8.67268	10.812	9.77321	9.62289	7.78847	9.36734	10.6377
ATP1A2	53.2525	48.9093	44.8519	5.77099	4.63101	6.27168	5.45672	4.93382	6.68532	5.21312	5.44249	4.93705	4.97784
ATP1A4	8.5322	8.03212	8.89177	4.74836	4.44798	4.8383	4.74198	4.97399	4.65512	4.95897	4.67272	4.36598	4.34472
ATP1B1	2483.75	2433.48	1952.29	363.146	296.816	1724.9	1777.97	1407.94	1129.14	440.493	650.053	820.115	832.766
ATP1B2	30.195	27.9804	21.2028	7.25241	5.82024	7.781	4.87328	7.18614	6.49822	6.27353	9.06208	7.36622	6.92469
ATP1B3	1945.89	1867.62	1797.7	649.024	714.825	1306.41	1241.28	999.447	1151.98	655.07	654.488	936.895	940.753
ATP1B4	9.1111	9.87079	10.6638	4.67985	4.31291	4.13436	4.57005	4.00591	4.01975	4.17351	4.37593	4.90762	4.48841
ATP2A1	9.57742	9.26179	8.91286	6.69346	5.82528	5.98905	6.34228	5.9233	5.80318	6.40452	6.41652	6.68386	5.98024
ATP2A2	657.933	645.944	699.488	868.613	862.494	556.89	550.529	791.76	727.526	503.455	521.456	754.915	740.481
ATP2A3	10.5109	10.5853	9.04596	5.46514	5.84176	6.50359	6.07943	6.12623	6.25533	5.90353	6.14684	5.74747	5.83104
ATP2B1	392.962	504.698	354.76	244.306	258.605	182.196	214.854	234.578	209.918	172.062	218.876	957.85	916.102
ATP2B2	12.2868	10.2172	10.9968	5.54835	6.1984	5.18781	5.78131	4.86401	5.13354	5.24456	5.63556	12.4752	10.0296
ATP2B3	13.2167	12.9849	11.6565	3.88774	4.89554	5.12925	4.9906	4.83963	4.60346	4.93989	4.54625	4.95898	4.52253
ATP2B4	997.657	919.359	1119.65	67.909	71.6696	183.846	178.251	358.179	321.757	343.893	348.35	705.986	733.196
ATP2C1	1121.61	1100.48	1203.06	172.63	183.147	154.122	184.92	223.203	160.996	243.318	286.155	309.126	298.664
ATP2C2	12.9158	12.2288	12.7242	5.81167	5.5523	5.51722	5.26067	5.49729	5.23307	5.51094	5.83649	5.85892	5.35249
ATP4A	9.23552	9.06433	11.189	5.30845	5.15871	5.12559	4.70399	5.20458	4.86681	4.57876	5.41813	4.67497	5.71712
ATP4B	9.35208	10.9366	10.5509	4.66783	5.2735	5.16171	4.99957	5.22861	5.80952	5.16985	5.22811	5.27998	5.40012
ATP5A1	6475.96	6737.03	6541.55	2905.37	3203.8	3020.97	3120.32	3067.58	3234.11	3228.15	3234.86	2576.47	2593.36
ATP5B	5936.18	5867.47	5456.32	2936.27	3008.82	2667.75	2658.18	3817.2	3599.19	2637.88	2660.82	2875.81	2900.71
ATP5C1	3684.11	3432.27	3490.07	1351.13	1359.34	1903.26	1840.55	2284.27	2464.08	2243.68	2338.32	1913.58	1966.2
ATP5D	376.417	388.848	397.412	261.61	248.47	437.856	448.825	250.985	289.341	236.624	210.589	242.329	259.239
ATP5E	4118.69	4028.93	4309.44	2158.3	2421.98	2125.4	2334.88	2886.96	2626.88	2793.7	2958.08	2845.96	2641.92
ATP5F1	4936.86	4892.24	5025.97	2666.18	2855.03	2687.25	2757.2	3457.64	3394.13	3016.48	3367.89	3446.05	3458.48
ATP5G1	1435.06	1224.24	1386.65	1173.9	1083.73	1032.41	1027.23	1326.57	1449.76	1017.63	829.598	781.263	787.637
ATP5G2	1647.68	1609.34	1575.34	1112.06	1119.27	973.64	930.447	1838.5	1989.94	1007.49	939.427	977.144	936.278
ATP5G3	2827.99	2829.44	2833.23	2257.83	2243.4	1971.09	1958.17	2896.23	3022.47	2277.9	2413.49	1203.21	1202.92
ATP5H	716.656	720.048	767.227	2069.24	2168.65	1785.13	1756.84	2292.63	2517.42	2339.56	2368.86	1945.85	1828.97
ATP5I	2918.02	2879.69	3193.52	2790.33	2922.18	2453.9	2591.9	2294.73	2480.5	1978.9	2154.28	2429.5	2474.64
ATP5J	6312.08	5922.56	5825.93	4057.55	4248.9	4164.95	4101.63	5923.58	5354.85	5446.06	5674.19	5287.06	5595.29
ATP5J2	16.2649	10.5684	9.69847	10.8967	12.2222	8.61217	9.09736	10.6058	13.7965	9.1179	10.401	11.8646	9.48953
ATP5L	3812.47	4107.3	4258.74	4255.78	4433.79	3985.71	3945.09	3541.41	3733.56	4091.22	4043.15	3332.46	3150.73
ATP5O	2579.23	2473.18	2666.18	1362.68	1385.58	1029.09	1057.17	1265.99	1233.12	1324.22	1318.93	1534.87	1443.29
ATP5S	148.481	151.196	157.976	199.922	210.148	61.0435	56.6316	68.3746	75.5543	80.6064	97.4075	42.6188	43.6532
ATP5SL	526.658	490.956	424.61	284.935	297.777	412.319	389.931	216.606	242.528	350.421	362.002	195.057	180.032
ATP6	11361	10725.4	10947	6533.89	7461.89	8942.93	8908.26	7813.49	7479.5	8057.85	7946.65	8590.07	8480.39
ATP6AP1	960.834	1010.54	1177.94	891.227	1049.94	1389.19	1383.1	912.321	945.277	2195.43	1826.68	1382.03	1399.1
ATP6AP1L	11.9556	9.49599	10.7277	6.40256	6.4303	6.02795	5.82973	6.65913	7.28508	6.21547	8.06736	41.9453	29.0349
ATP6AP2	2222.65	2267.91	2680.38	816.656	829.564	1607.01	1681.34	1038.39	874.072	2300.68	2452.23	2290.96	2217.3
ATP6V0A1	109.676	98.0707	126.369	98.6692	90.3109	81.2112	78.3616	50.9513	60.017	123.15	96.1682	46.1932	41.3288
ATP6V0A2	75.7628	60.1125	60.4692	54.9248	53.5893	27.2191	30.0585	43.8308	42.538	25.8426	26.6504	27.8726	25.8166
ATP6V0A4	6.95543	6.25133	7.5637	6.37254	4.30932	9.64396	8.72302	17.2462	14.2231	4.16544	4.01748	4.01005	5.00102
ATP6V0B	1059.84	1118.79	1262.52	1159.27	1177.92	1363.13	1344.23	1784.46	1628.45	1432.64	1354.64	2210.78	2217.65
ATP6V0C	303.196	195.199	275.867	1147.22	1109.09	1185.89	1148.75	894.164	964.883	951.405	848.478	919.209	947.758
ATP6V0D1	942.658	740.584	916.546	1694.04	1888.48	1853.71	1838.47	1108.58	1209.77	1484.04	1346.94	1854.86	2144.15
ATP6V0D2	8.66898	9.71492	7.85066	4.00571	4.68907	4.57368	4.46013	4.40359	4.56807	4.81045	4.83718	7.46327	7.17233
ATP6V0E1	2887.7	2668.9	3584.37	889.559	974.775	1725.42	1755.1	1176.64	1137.49	1635.55	1764.08	1655.37	1596.49
ATP6V0E2	481.693	517.96	534.465	281.601	281.92	166.546	171.305	425.022	468.783	446.025	363.333	277.031	245.436
ATP6V0E2-AS1	17.5337	20.4086	17.0282	20.1298	15.0243	5.15918	5.38658	11.5775	13.6583	18.1319	12.219	15.5533	18.2727
ATP6V1A	1238.77	1197.51	1247.98	897.64	884.845	899.662	803.762	1119.73	1149.01	997.378	1096.15	1065.61	1108.47
ATP6V1B1	13.602	14.0564	14.7692	8.45441	7.39949	7.32989	7.10241	8.21988	7.94061	7.72374	7.35519	7.70242	9.78841
ATP6V1B2	1141.31	1061.71	1173.03	591.289	580.188	1201.51	1128.5	943.242	936.229	2349.4	2170.86	1988.84	1848.32
ATP6V1C1	331.222	353.301	401.992	378.382	404.321	710.205	655.869	648.428	605.631	496.034	550.55	778.971	749.834
ATP6V1C2	8.65681	7.89067	11.0641	4.66434	4.4971	4.41979	4.22893	4.90471	4.87124	4.41532	4.73265	4.81782	4.65539
ATP6V1D	1553.24	1602.02	1657.93	542.974	522.141	712.648	725.336	676.869	676.74	690.906	721.507	610.145	553.599
ATP6V1E1	1614.96	1558.8	1688.71	1348.92	1322.13	1757.45	1814.06	2611.86	2860.73	2976.02	2919.97	1816.72	1783.67
ATP6V1E2	58.4269	49.499	47.7412	8.23018	8.18397	4.94929	6.67495	11.5838	12.5803	9.48704	10.7528	11.6889	13.1518
ATP6V1G1	1202.64	1082.19	1229.71	391.163	382.459	516.279	533.921	463.531	492.697	422.002	443.271	723.562	670.532
ATP6V1G2	20.8894	29.9862	24.2364	4.00964	5.58176	5.04976	7.83381	6.48252	12.5161	18.6045	17.5756	8.11106	5.74236
ATP6V1G3	13.4103	10.0005	15.8025	5.34837	6.96956	28.2327	34.2981	4.70383	4.29172	4.06729	4.6506	15.1186	9.92215
ATP6V1H	765.406	732.231	741.628	121.964	127.401	377.475	382.273	244.254	288.923	283.946	288.8	281.269	280.894
ATP7A	265.61	227.978	333.459	70.0924	109.993	39.9095	40.2695	38.6095	45.3562	112.41	124.499	65.5234	65.1885
ATP7B	50.9711	53.5974	88.9281	6.70882	6.79806	9.07777	9.73933	5.69519	6.47036	16.3052	15.6181	8.26617	7.18404
ATP8A1	38.446	41.1036	37.7225	6.06069	8.18015	4.71756	4.47941	5.0132	4.48304	6.2873	7.80389	4.3018	4.64829
ATP8A2	45.564	37.3856	27.3232	4.88342	4.57712	5.27902	4.02985	5.68894	5.91573	5.27059	5.99362	4.57167	4.27206
ATP8B1	1239.33	1410.16	1661.31	134.451	108.992	737.493	722.185	53.2451	43.1961	91.0424	131.115	128.219	130.589
ATP8B2	83.1365	85.115	113.979	105.205	88.2642	149.542	138.873	183.924	167.741	87.2273	93.2222	416.629	449.63
ATP8B3	9.27352	10.1882	10.778	9.84996	7.85994	6.66005	7.03757	7.34486	6.92715	5.80874	5.92116	7.42354	5.9143
ATP8B4	10.7117	11.8989	11.1646	3.79569	3.91518	2.88077	3.27522	3.68976	3.18245	4.07937	6.26425	4.17643	4.04966
ATP8B5P	9.2251	9.00114	8.27183	4.35699	4.6738	4.49113	4.33631	4.11737	4.3673	4.00148	4.25285	4.15962	3.91645
ATP9A	1284.54	1185.75	1130.16	82.9197	90.515	214.305	231.873	201.198	209.02	195.699	224.517	159.745	133.635
ATP9B	41.7433	46.619	54.6632	7.19191	7.59248	16.9068	17.1899	17.4885	16.3597	21.647	22.3593	15.35	14.4381
ATPAF1	653.725	591.297	691.998	383.674	370.925	352.444	337.222	266.124	262.899	276.724	318.152	403.558	333.564
ATPAF2	49.0191	44.9382	45.0881	81.1747	112.874	72.4636	53.8567	49.3933	62.1126	58.1048	67.301	30.2555	27.6928
ATPIF1	1063.94	1056.96	1199.51	779.359	817.642	791.796	843.94	611.61	562.077	624.803	683.293	970.319	902.357
ATR	627.403	633.13	593.961	153.883	157.705	360.5	392.408	276.002	277.584	217.529	251.909	327.288	294.758
ATRAID	1986.79	1964.42	2092.98	2102.68	1966.29	1073.45	1019.6	2601.43	2633.92	1153.07	1170.28	1847.55	2050.57
ATRN	258.67	284.981	300.621	175.783	186.87	254.167	285.444	451.71	461.169	320.639	364.561	278.216	247.718
ATRNL1	13.4589	11.1242	14.0099	4.23684	4.84482	5.77157	5.57874	10.3843	11.0789	4.437	5.03259	5.82507	5.72245
ATRX	886.375	1001.14	912.959	313.686	308.495	200.531	221.462	167.998	186.515	260.756	305.315	231.985	254.381
ATXN1	349.037	359.567	289.519	39.0821	41.0683	33.6901	34.4183	69.9624	68.1223	134.067	181.194	82.6653	73.7089
ATXN10	1853.81	1744.22	1812.56	972.802	1033.67	1454.29	1565.34	1909.98	1608.59	2736.4	2897.16	1270.05	1302.88
ATXN1L	1089.24	1052.25	1044.32	405.464	410.129	325.501	309.503	359.993	347.902	251.858	293.867	348.124	366.364
ATXN2	306.574	296.566	342.063	281.049	283.511	204.881	229.678	133.607	150.438	132.415	131.129	168.96	167.642
ATXN2L	22.4974	22.3855	21.8177	24.3534	27.7465	22.3748	25.3509	19.3723	21.4628	16.0126	17.912	19.7157	18.8783
ATXN3	141.137	141.652	113.429	58.4997	61.523	32.4722	27.3905	27.7414	26.315	29.0877	36.4956	26.8331	26.3237
ATXN3L	6.86044	7.27514	8.04927	3.37138	4.13192	4.57464	3.55542	3.51045	3.12448	3.53202	4.12327	3.80954	4.29785
ATXN7	190.422	225.909	208.298	118.415	108.222	127.754	143.791	101.675	83.6327	61.2597	83.448	127.191	118.666
ATXN7L1	15.0852	17.2822	18.5893	14.4556	17.4173	7.74913	8.35108	14.2113	18.5311	9.88878	12.0752	21.4484	15.9442
ATXN7L2	8.22434	8.24801	9.35625	4.99467	4.5737	5.19551	4.408	6.65844	4.86675	4.9655	6.27114	6.72727	5.27639
ATXN7L3	60.7003	63.336	58.5239	199.282	214.015	170.269	208.264	122.425	140.789	169.705	128.279	139.914	161.172
ATXN7L3B	974.784	979.993	900.705	358.933	346.977	241.204	259.147	287.584	263.372	159.845	159.514	211.431	218.229
ATXN8OS	9.01147	9.0366	11.1223	3.72003	4.66784	5.19744	5.15931	5.38596	4.52277	5.22245	5.12141	5.33057	5.79444
AUH	279.924	247.156	174.793	110.161	129.052	197.354	189.387	115.436	114.181	82.1947	87.1652	100.904	110.805
AUNIP	38.9691	22.5329	16.0226	118.407	95.9792	64.5422	73.8048	50.4252	51.3639	25.593	28.7697	56.1182	46.8785
AUP1	913.776	903.76	1004.08	1694.01	1748.44	888.988	875.097	1887.82	2070.66	988.193	968.545	1637.27	1488.33
AURKA	1007.89	847.204	587.85	1535.05	1455.96	1555.02	1482.74	1351.54	1351.68	1095.79	1134.75	1401.69	1286.35
AURKAIP1	545.412	503.38	491.42	877.388	810.801	661.167	592.167	576.25	610.791	677.829	614.066	806.665	786.953
AURKB	40.0486	46.2445	29.9569	451.719	510.772	353.751	332.541	320.969	354.517	343.597	312.895	239.206	219.453
AURKC	7.56897	11.199	9.22493	6.4911	5.08679	7.57551	5.94162	5.25092	6.95148	7.74981	6.53471	6.80975	6.88353
AUTS2	516.184	452.268	470.682	5.98587	5.86109	27.5304	29.3343	14.2775	13.7229	397.205	431.786	292.984	265.027
AVEN	1334.74	1157.21	1321.94	248.822	274.266	390.678	371.275	229.433	212.029	131.134	121.63	358.265	374.57
AVIL	30.7154	31.289	33.2933	9.58309	8.8164	9.22998	9.98309	12.9315	13.6017	10.8794	8.65949	11.2567	9.62784
AVL9	254.33	231.789	256.834	96.6219	88.4959	84.3962	97.5387	131.216	126.607	78.2374	85.2914	120.804	115.246
AVP	7.22359	6.89008	7.72591	4.29713	3.67645	3.58712	3.88486	3.92551	4.1617	3.38195	4.70272	3.70165	4.15879
AVPI1	47.7007	38.2831	55.1537	103.752	92.1028	32.8774	25.0182	62.3	79.8428	105.845	76.2259	32.9753	35.8083
AVPR1A	8.977	9.73206	9.53103	4.33934	4.77653	4.43476	4.73738	4.36327	4.60535	4.65391	4.88221	4.97593	4.50987
AVPR1B	35.0378	25.5365	29.9262	7.08669	9.32283	8.19873	8.56958	8.41759	7.49045	8.18229	7.32746	8.78588	8.95236
AVPR2	12.2377	12.9013	11.3533	5.38672	5.39522	5.00015	4.19107	4.93419	4.66615	4.99377	5.019	4.80196	4.6199
AWAT1	7.4213	9.80195	10.3929	6.11016	8.73198	7.07316	7.1051	5.55106	6.16513	5.67437	8.07697	6.87459	6.8693
AX746627	13.8451	13.7244	17.7805	6.48078	6.79848	6.40937	7.43334	6.57442	6.76281	4.4853	6.10764	5.58704	5.79383
AX746699	9.68372	6.6427	6.49306	3.89615	3.77294	3.14542	3.84457	3.91984	4.95449	4.13231	3.49029	3.50211	3.56656
AX746710	8.56575	9.38572	7.57781	3.8194	3.47999	3.6405	3.36537	4.18791	3.92181	3.69151	4.48094	4.50972	4.44816
AX746823	57.0694	55.851	49.2259	7.09847	9.33541	5.62652	7.46735	12.3928	10.7696	18.6214	15.7458	8.22828	7.16486
AX746830	8.64188	8.14323	8.71372	4.39099	4.0357	3.32423	3.63989	3.35235	3.74981	3.8059	4.45953	3.88008	4.10799
AX746968	16.546	15.091	15.5379	8.99079	9.20572	11.3361	9.55896	9.92887	10.9386	9.67512	11.85	10.7259	8.32487
AX747031	7.81739	7.29063	6.53866	3.94357	3.44291	4.23572	4.24827	3.80507	3.64396	3.32999	4.10007	3.82548	3.81403
AX747064	9.77092	8.11853	10.4292	7.26955	12.3623	5.11195	4.32129	5.36392	5.47665	5.7665	5.84964	4.76943	5.44507
AX747191	19.6727	27.8187	21.117	5.09995	5.68201	5.1472	6.24333	6.12311	6.18241	6.05752	6.36198	6.47016	7.20775
AX747250	9.62453	8.52109	10.1134	4.35687	3.8411	3.44792	3.16821	3.0639	3.80787	3.19411	4.01832	4.97397	3.29499
AX747261	12.1737	11.0537	11.5738	5.61996	6.01654	6.81762	6.78276	4.94859	5.4636	5.65087	5.58497	7.24033	6.77996
AX747405	9.5304	9.08892	8.81373	5.6724	4.52156	5.68707	5.8595	4.66809	5.51516	5.70522	4.19577	4.7972	5.27244
AX747444	12.8711	10.453	11.9108	3.82575	4.15607	4.22437	4.54478	4.12892	4.21328	4.4663	4.29136	4.63645	4.88082
AX747507	38.3977	60.9187	45.8003	7.93771	7.67751	8.83219	8.88617	7.66133	6.14194	8.80622	8.94134	6.18612	7.74879
AX747630	7.67386	7.21556	8.91239	4.77108	5.12832	4.56742	4.8505	3.27012	3.95637	4.11563	4.23913	4.51496	4.83441
AX747652	45.5157	54.1796	37.3241	8.6439	9.50874	16.5469	10.7105	6.53981	6.66728	6.13286	5.60681	6.64937	8.22101
AX747730	15.7274	17.386	12.5124	9.93357	14.3827	4.25461	5.2292	9.0453	7.64461	4.79781	4.57986	4.95845	5.02341
AX747826	16.8792	16.0042	13.444	5.6735	7.35651	6.65955	8.30004	6.22993	6.75002	6.91876	6.25483	5.21365	5.68681
AX748157	12.1272	13.0997	13.8476	7.63354	6.32381	5.72348	6.81905	6.6094	6.13607	6.45012	7.8242	7.14598	7.02383
AX748267	11.8081	16.4683	12.4991	5.71495	5.03375	5.82519	6.20636	5.99171	5.3095	6.0899	5.929	5.6948	6.00868
AX748273	13.369	18.5251	12.7367	5.41792	3.92361	7.10239	6.32322	39.4909	46.0667	5.31126	5.86016	6.44876	5.02232
AX748292	10.184	10.0057	9.28746	4.08999	4.04115	4.5772	5.05502	4.80102	4.40556	4.15502	4.83442	4.73088	4.64252
AX748339	34.2775	26.1606	29.8289	10.9589	11.2655	7.9563	9.24113	13.091	9.79649	5.79824	8.52293	8.56467	8.39474
AXDND1	11.7443	11.1214	11.9848	5.72021	4.82782	4.78654	4.80548	5.41727	4.79364	5.10693	5.64635	5.07057	5.16542
AXIN1	22.083	23.2074	26.6955	22.5562	26.358	26.9807	31.2045	7.08865	8.95696	14.1912	17.8014	18.0702	17.235
AXIN2	47.3584	54.093	61.1697	8.47223	6.02167	11.3024	8.96	8.30667	7.22788	8.35531	7.95781	9.91423	10.366
AXL	1454.72	1245.07	1385.6	643.169	627.321	1891.94	1851.83	1323.55	1170.39	1258.35	1149.8	456.184	451.506
AY927499	13.0983	11.9173	15.9809	4.96611	6.07034	7.04288	4.72989	5.50942	5.3912	6.28058	5.45703	7.49163	8.66539
AY940074	47.3311	48.8596	47.1246	12.325	10.9188	9.1443	7.73942	14.0476	11.0836	8.31977	8.70102	8.96498	12.3648
AZGP1	12.2807	14.7093	15.6247	4.6594	7.28815	6.55664	7.82203	135.69	190.761	7.51922	5.08308	4.97713	4.07503
AZGP1P1	14.9545	10.0614	12.6971	4.62181	5.01145	5.42073	6.095	4.4321	4.25224	5.28954	4.81988	4.74372	4.8985
AZI2	308.025	292.796	311.964	94.6481	98.4221	74.5545	82.9759	77.2589	69.5717	51.4478	60.8659	95.6973	86.1821
AZIN1	2717.78	2493.89	2384.2	1099.75	1075.98	972.49	989.198	1294.98	1189.38	1327.01	1412.78	1134.56	1181.18
AZIN2	32.1514	39.9905	39.0913	16.4962	17.4577	14.7154	13.5324	12.3625	11.6127	13.764	15.0003	20.0621	16.6184
AZU1	10.534	12.2642	10.6819	6.18523	5.00023	4.37411	6.01973	5.32313	6.14836	5.81712	6.18011	6.70547	5.49562
B2M	5598.33	5882.82	5862.71	3687.78	4227.2	5932.33	6075.68	3913.83	4080	6273.92	6603.55	6267.82	5754.03
B3GALNT1	470.826	499.122	589.679	84.9361	92.0866	424.642	475.583	100.24	70.2701	154.52	176.725	186.942	171.55
B3GALNT2	246.522	231.418	226.954	67.795	75.9965	72.6122	78.2598	144.612	147.51	166.653	171.769	132.212	104.125
B3GALT1	11.1522	11.2078	8.79922	3.81247	4.53113	4.75184	4.84688	5.31953	4.67738	4.5633	4.65844	4.03053	4.49683
B3GALT2	131.842	112.967	146.613	5.82829	6.48711	4.9469	4.34372	29.2326	28.6369	4.34009	5.28129	4.77927	4.20531
B3GALT4	17.9664	28.6199	24.871	8.84757	9.9277	8.69704	7.61552	7.95599	7.48575	8.80922	9.21185	8.45379	7.12358
B3GALT5	16.684	17.7963	12.833	4.38039	5.58506	5.59937	5.97754	6.85924	6.35041	5.13282	5.24164	8.6145	7.97807
B3GALT6	699.926	640.568	716.409	219.927	198.877	399.433	413.069	196.981	199.29	332.804	295.378	307.037	297.007
B3GALTL	233.473	179.736	155.32	52.0237	42.8036	119.793	120.907	72.7895	76.6048	204.323	183.547	74.0795	79.7984
B3GAT1	20.3286	19.2151	15.5404	8.6689	11.814	6.74823	10.8365	9.81702	10.0489	8.26379	7.3836	7.00121	9.54104
B3GAT2	16.5278	12.866	19.4765	8.01	7.13929	6.8426	5.32381	6.07852	5.56857	6.20865	7.77791	5.89384	5.8175
B3GAT3	61.2619	72.952	77.1886	52.7963	72.3497	66.026	54.0314	78.6843	89.386	86.1394	79.4108	84.3126	52.8119
B3GNT1	290.893	327.262	436.527	210.088	214.536	188.318	209.56	239.127	267.946	200.98	216.524	120.135	120.492
B3GNT2	376.737	439.189	445.016	153.327	142.664	117.198	125.321	139.966	128.894	224.244	229.426	371.85	369.553
B3GNT3	12.8736	10.3239	10.5577	5.98745	6.25689	6.12277	6.87605	5.0865	5.81617	5.89279	5.96293	5.36766	6.5445
B3GNT4	22.212	33.313	35.5394	11.0903	15.957	9.83854	12.9482	13.6929	8.80636	13.2905	13.9174	13.5802	11.5871
B3GNT5	231.334	261.108	188.761	8.88954	9.57046	233.783	224.449	148.984	146.391	364.039	449.274	10.7041	12.4451
B3GNT6	11.9955	16.8155	13.375	6.62465	6.84729	7.09845	6.16715	5.66288	6.07257	6.07059	6.1667	6.53241	7.09256
B3GNT7	19.6537	20.8634	20.2985	10.939	10.5389	6.52249	7.35193	105.184	131.458	7.5634	7.88511	8.39149	8.47848
B3GNT8	11.8252	10.4811	13.3437	6.49768	6.48526	6.54501	7.39046	7.18739	6.78795	8.34552	8.99258	7.29704	7.00123
B3GNT9	36.973	38.9474	42.4255	236.256	227.542	195.104	177.659	29.7331	25.7984	97.6918	107.453	233.478	253.019
B3GNTL1	49.2835	45.1665	37.4516	29.7735	32.4435	56.1063	34.7216	53.3919	70.6006	13.3054	12.1565	15.7597	18.4479
B4GALNT1	14.4948	16.4002	16.2537	19.2191	20.7515	19.7805	18.3171	21.1272	24.0838	10.4773	9.79412	14.6805	15.8433
B4GALNT2	10.0002	9.22694	11.8279	4.15927	5.23707	5.20721	4.6848	4.41777	4.63379	4.99175	5.30775	5.09686	4.7832
B4GALNT3	15.9339	17.2912	14.7024	6.6751	6.0923	6.65992	6.38114	7.07334	6.14519	6.49767	7.01816	6.57217	6.19363
B4GALNT4	9.04628	9.77097	10.6304	4.95406	5.51155	5.45222	5.62562	5.79491	6.08739	6.41129	5.48911	5.52811	6.38828
B4GALT1	156.418	181.637	162.01	27.0939	31.5569	144.985	139.388	54.5061	42.7662	33.6894	31.3615	64.6224	56.0194
B4GALT2	55.1464	52.2904	57.9844	53.1804	45.2753	63.1276	61.7419	43.8012	45.4109	60.5622	55.4655	70.6747	77.0206
B4GALT3	248.304	192.191	218.288	146.918	138.069	197.633	200.505	283.653	295.988	192.35	177.913	296.301	290.296
B4GALT4	535.699	630.54	575.236	178.439	174.556	520.185	532.79	167.985	122.19	207.798	236.21	263.385	241.19
B4GALT5	1142.84	1109.52	1093.76	625.278	664.334	744.728	774.171	721.828	697.425	853.346	791.564	1039	1091.64
B4GALT6	53.0478	54.2611	64.6397	38.0547	42.7075	107.641	108.993	519.594	412.998	11.5704	11.2104	37.0604	39.305
B4GALT7	86.6147	81.437	98.7969	112.989	128.513	130.156	142.544	84.3812	88.8698	116.607	99.6279	84.5873	112.748
B9D1	34.8202	31.3119	34.1791	71.1179	76.4996	83.999	74.968	35.9016	41.8667	47.7726	53.1983	26.0455	25.4532
B9D2	25.6825	31.8666	31.6283	22.7907	21.2065	69.7467	75.5165	21.0784	27.9833	35.473	35.9837	24.6718	14.5966
BAALC	97.9406	69.6164	93.3939	5.00804	5.05114	3.96422	4.81841	5.6709	4.02984	278.345	319.391	342.73	360.228
BAALCOS	13.3334	10.7853	10.8351	6.81316	6.22915	8.24828	8.07697	6.09533	6.28181	6.33251	7.71011	6.01387	6.97003
BAAT	11.0162	14.8737	11.9661	6.44415	4.88737	5.36739	5.18167	4.7186	5.08237	5.51838	5.19886	5.0883	4.5919
BABAM1	1002.48	995.82	844.02	724.551	793.512	1376.67	1267.77	863.304	945.315	1143.25	1136.95	781.448	808.626
BACE1	437.716	384.772	410.601	110.018	111.652	204.679	195.788	271.695	291.006	232.477	234.027	299.788	298.631
BACE2	1111.19	1023.85	1664.47	32.7647	31.5828	556.867	614.084	1142.22	1113.11	224.505	239.84	444.084	419.81
BACH1	429.014	530.256	517.067	113.795	110.57	92.4275	88.8295	86.26	80.2141	65.7578	61.7632	93.1453	98.4642
BACH2	151.53	121.699	124.649	5.88388	6.30125	6.67023	6.81378	7.45438	7.05358	71.0881	55.1339	11.9972	9.5871
BAD	69.905	67.7891	76.9945	142.478	141.007	164.555	146.668	120.677	156.683	144.322	121.216	87.4973	90.7293
BAG1	295.439	268.837	270.849	200.137	183.917	135.22	128.834	128.614	142.96	102.714	99.9904	176.409	172.65
BAG2	200.607	243.953	260.486	412.11	380.542	215.36	208.889	200.598	170.342	160.872	156.295	221.082	213.815
BAG3	2071.09	2052.03	2324.34	1224.32	1045.5	852.272	831.65	722.677	659.206	323.375	409.788	732.277	750.411
BAG4	535.976	599.384	598.036	338.624	326.894	199.597	196.244	241.025	199.375	245.031	266.53	266.297	247.063
BAG5	664.468	619.782	622.855	306.825	328.89	295.096	310.867	237.028	228.9	254.71	245.801	251.156	222.548
BAG6	871.466	856.254	828.428	1213.77	1266.27	1301.84	1329.85	911.448	898.575	1003.56	953.243	771.327	838.182
BAGE	12.5411	12.3295	12.5553	101.215	104.699	46.8451	59.81	5.63436	5.57314	5.5511	5.21886	5.56899	4.56615
BAHCC1	14.8912	15.823	16.1303	10.1578	10.2438	11.2403	10.9747	10.5668	9.19286	11.9383	13.7695	11.7287	13.456
BAHD1	78.3343	102.87	82.9138	56.4739	47.3349	61.0093	68.4057	69.1939	65.3208	65.6091	71.1057	70.8102	71.3638
BAI1	10.6048	10.4496	11.1686	6.98331	8.90641	9.97933	9.99269	9.9286	10.2754	8.51279	7.09483	8.08984	9.25529
BAI2	30.1613	31.5457	85.8114	17.3773	14.323	19.4814	14.5095	39.3291	26.866	30.3959	30.2476	43.8823	58.2064
BAI3	18.6248	15.7399	13.2439	4.10789	4.27125	4.84081	4.99928	3.73389	4.83099	5.54754	5.25783	3.75626	3.75789
BAIAP2	49.0505	50.1867	47.1906	44.5476	36.1783	36.6917	40.0937	33.9624	32.7228	80.777	65.8051	45.4474	47.4137
BAIAP2-AS1	49.0041	46.1237	50.9625	43.2473	41.9575	42.2657	40.5097	72.7238	83.669	51.3611	55.0228	27.8613	21.2262
BAIAP2L1	225.634	245.121	245.946	4.66343	5.7144	22.7408	26.6555	161.445	147.634	5.31544	5.80679	143.093	142.798
BAIAP2L2	10.605	9.8871	9.29912	6.03556	6.22911	6.41653	5.67772	6.2473	5.58572	5.45157	6.15207	6.12919	6.5582
BAIAP3	23.4634	21.8616	22.5765	7.2142	7.69269	7.54042	8.91802	7.43713	6.43555	7.24704	7.51243	8.50476	7.70465
BAK1	72.3203	74.7274	104.947	33.6143	36.5642	54.8495	57.2693	35.5719	35.7168	49.852	32.5128	38.0399	50.706
BAMBI	816.163	737.164	925.157	243.702	353.053	142.016	169.188	1943.36	2325.79	513.769	454.656	282.824	288.147
BANCR	13.4026	12.0615	15.9724	4.83712	5.42601	6.22862	5.71138	8.72684	8.90814	5.78078	5.99127	5.03261	5.75785
BANF1	1969.38	1959.95	1825.86	4017.2	3890.02	4256.95	4471.07	3483.71	3622.2	3288.61	3051.91	2058.39	2166.24
BANF2	9.60874	10.1031	8.57182	4.64765	4.05077	4.49772	5.20926	4.74746	4.62775	5.17691	4.08899	5.02703	5.68322
BANK1	10.0519	11.69	13.8309	4.13285	4.67321	8.25937	8.7172	4.97275	4.5412	4.64999	5.34264	11.7496	9.59664
BANP	630.645	553.264	614.34	211.904	180.78	144.135	132.917	255.923	292.386	83.2086	72.5226	161.114	154.109
BAP1	186.977	163.491	191.38	254.856	276.239	213.565	213.728	232.712	252.666	149.659	144.145	270.762	279.549
BARD1	269.303	226.285	182.447	150.828	143.447	247.235	249.864	267.058	230.218	240.703	249.563	206.197	199.069
BARHL1	10.3077	9.99249	13.259	7.16742	5.68375	7.90648	8.75707	8.24165	6.07038	7.32057	7.09097	8.08093	8.29664
BARX1	11.9417	14.0013	13.246	6.52225	7.52114	5.15729	6.10218	4.8727	5.52216	5.84802	5.96456	6.98974	6.92497
BARX1-AS1	6.89155	8.577	9.64183	4.88352	4.6197	5.61212	4.42453	4.09336	4.50035	5.28968	5.43231	5.71536	4.16886
BARX2	16.0184	13.8436	14.9677	6.15518	6.30492	5.98392	5.8467	6.68936	6.2505	5.91774	6.63718	5.52729	8.34415
BASP1	2950.46	2977.69	2796.54	907.913	891.867	5.48987	5.54877	9.9846	11.7097	438.219	456.412	464.391	480.912
BATF	15.8136	16.482	19.3857	9.68223	10.3964	9.23383	9.83265	9.68543	8.9477	10.3553	10.9087	11.8088	10.5157
BATF2	11.3393	11.4012	13.6573	10.0744	12.1856	9.51691	13.3426	7.47449	6.39288	19.4628	15.5803	8.04775	9.13665
BATF3	17.556	16.6761	19.015	88.9884	96.9052	16.7064	16.1708	106.901	112.926	13.0205	11.5114	14.3747	13.8608
BAX	340.876	321.727	275.133	310.567	346.651	258.578	212.722	284.423	249.193	112.818	152.729	88.2172	130.414
BAZ1A	830.491	869.662	670.405	338.233	342.382	274.261	338.519	354.318	254.426	322.58	379.885	432.575	402.611
BAZ1B	146.343	119.205	131.775	213.269	202.881	172.864	171.872	229.214	196.658	156.968	148.046	322.982	312.27
BAZ2A	54.1116	53.3048	64.5841	42.9068	49.9885	35.1495	31.3279	38.7194	46.2622	24.3192	28.8812	38.9649	35.0593
BAZ2B	575.23	650.713	696.368	36.6391	45.4939	76.4961	71.169	90.076	98.915	137.455	146.579	140.424	136.118
BBIP1	577.393	569.533	620.257	379.324	407.987	246.319	244.157	319.079	355.256	343.378	398.511	270.199	264.144
BBOX1	15.2708	19.6081	13.4801	4.5966	4.66512	3.86923	4.16669	4.97038	4.60662	135.038	135.922	5.99734	7.37426
BBS1	108.745	114.584	116.674	22.3851	23.7729	26.2821	22.709	41.2157	42.9243	59.7027	60.1767	20.2104	21.8344
BBS10	549.989	540.465	594.409	226.695	246.697	255.576	190.115	215.714	159.453	81.7683	119.637	203.965	170.611
BBS12	283.707	290.81	203.81	18.3537	15.1541	21.8168	25.3773	32.8945	35.389	15.0642	16.2957	24.9454	20.9828
BBS2	539.581	533.633	542.473	369.521	433.977	380.04	348.653	272.955	338.605	168.813	206.681	202.398	160.913
BBS4	411.892	397.68	391.031	203.313	182.19	93.1185	79.6107	204.198	241.766	124.304	133.798	221.062	200.776
BBS5	12.797	12.6306	14.655	4.23475	4.13166	11.5471	12.6865	11.4768	10.7145	7.44398	10.8463	12.3208	12.5627
BBS7	302.488	410.04	403.619	107.691	141.303	82.5241	103.462	56.5988	48.9031	37.0219	36.4352	184.922	209.486
BBS9	124.411	130.324	117.632	18.8711	24.8531	49.75	53.6376	34.1709	44.1711	46.5616	52.7882	90.4093	92.7621
BBX	670.452	687.586	700.677	266.724	276.68	388.207	439.279	277.411	292.531	180.839	244.881	303.764	327.992
BC010186	48.0635	58.4632	52.5918	8.45196	12.185	15.2637	11.9734	13.5495	13.2093	11.1108	10.8477	11.048	15.2526
BC012193	16.5017	15.5716	16.0997	13.9825	11.2941	7.44556	13.1582	19.746	21.9918	22.5091	24.173	10.5095	9.21046
BC015159	21.9662	26.7165	21.7726	26.3121	17.8526	39.8143	39.6497	6.42273	5.14487	50.7189	36.8325	8.96014	8.69641
BC016361	6.644	7.90245	6.65295	29.5708	40.4604	3.71302	3.93343	3.45799	4.32082	6.85058	5.60884	3.89622	3.84891
BC017209	11.3056	9.56985	10.091	3.98076	5.17138	4.37656	4.8883	4.50979	3.49417	4.22199	4.64893	5.01514	4.49213
BC021061	13.2022	9.43837	15.8336	3.71487	4.71677	3.88312	4.31448	5.62249	5.48442	4.45084	4.92893	5.19108	4.76198
BC022047	537.207	676.145	721.661	27.3034	34.5417	93.3582	92.7837	64.1518	63.495	233.021	209.717	70.1478	64.2355
BC022892	26.7523	29.9392	23.222	12.8359	19.704	9.5374	10.3777	23.4358	11.9342	8.03244	8.44604	8.87377	10.2413
BC023201	11.345	12.7636	10.9809	3.63418	3.80691	3.8588	3.93253	3.96819	3.88938	3.86959	3.90624	3.75402	4.67246
BC024169	5.86092	8.95121	6.73404	3.49291	3.58589	4.47372	2.91845	3.45132	3.90142	4.05857	3.71727	3.31672	3.78008
BC027448	21.3463	14.1348	15.6202	13.149	15.1957	6.05985	6.30692	9.02552	9.87119	6.54997	7.05333	6.75648	8.51471
BC028044	11.3381	11.0797	11.8257	8.41919	8.07584	9.00114	11.5758	5.51176	7.91807	6.54057	6.15294	6.38448	6.18871
BC028670	11.1315	9.56302	10.0083	4.12968	4.60567	5.16661	4.35825	4.29869	4.33355	5.36369	4.85358	4.94183	5.29583
BC030152	13.7059	22.6443	29.9862	17.3839	21.1291	26.228	22.068	19.1908	22.3164	25.5145	21.3644	10.5343	8.95017
BC032415	14.8201	15.0735	16.5952	6.42967	6.69649	7.03294	7.64326	6.63974	5.52789	9.27618	7.506	6.77625	6.65116
BC033164	8.95782	8.84033	10.3479	5.13995	5.44312	6.43854	6.44694	6.09275	6.6946	6.06813	8.00416	6.50459	5.99897
BC033241	6.71252	7.00525	6.56117	3.62836	3.97385	3.73049	3.36605	4.19723	3.79329	3.98595	3.76408	3.82602	4.9374
BC034416	7.52704	6.92509	6.90025	3.83864	4.14774	4.85699	4.38766	3.91301	4.03581	4.26814	4.40492	4.31214	4.7064
BC034444	8.0047	8.16553	9.4456	4.01138	3.76995	3.00038	3.97631	3.75123	3.45644	3.67781	3.57947	4.10681	4.17785
BC034788	8.5796	9.07324	8.97151	5.31968	5.0466	4.53491	4.15924	3.90512	4.441	4.05177	4.5511	4.4086	4.37275
BC035400	14.1177	13.2872	22.8723	3.55853	3.57129	3.81487	3.52255	3.42532	4.74901	4.06265	4.7371	3.42981	3.56411
BC036209	11.3225	10.834	10.0163	4.025	5.35284	4.01264	3.51798	4.88621	4.53349	5.12538	6.11402	5.49676	6.21183
BC036311	9.06153	9.65473	9.76938	4.61387	4.5884	4.33531	4.98052	4.03097	3.74393	7.25756	5.40508	3.50308	4.43221
BC038205	8.39631	9.07945	9.84426	4.6374	4.59576	4.16576	5.34629	4.73646	5.14669	5.43901	5.39973	3.96699	5.04689
BC039122	5.85093	6.44952	7.56751	3.05753	2.96936	2.85887	3.2811	3.91093	3.51348	3.89571	3.22382	3.34037	3.47159
BC039319	29.9862	23.1325	30.8866	6.37283	5.93263	5.37803	5.65137	4.20799	4.45448	5.48475	5.42951	4.89723	4.96604
BC039487	16.8966	13.1182	13.7113	6.04407	5.51858	6.0593	4.42638	4.87447	5.25977	6.37634	5.8557	4.21492	5.20524
BC039673	6.84154	5.85907	6.38177	3.49264	4.59275	3.65271	3.63848	4.07572	3.29273	3.79312	3.5839	3.48212	3.42597
BC039686	9.93416	12.6292	10.6835	6.02609	6.24027	5.66293	6.18198	7.58696	7.44162	7.874	7.13422	5.15437	6.63295
BC040311	8.25171	7.58393	6.99757	4.76769	4.09228	3.8473	4.6978	4.12189	4.55999	3.52627	3.99279	3.70779	3.84895
BC040734	12.7612	11.1235	17.1447	5.14522	5.36214	5.46338	4.17782	4.3537	5.8711	5.43768	4.45123	4.69865	4.46557
BC040833	14.4483	16.0826	10.5664	4.51658	4.43112	4.7961	5.40694	4.02763	3.93614	4.59022	5.00081	4.62412	4.74694
BC041025	125.13	120.254	89.1675	32.4153	27.0114	15.3877	15.6431	50.7029	47.4407	26.9129	26.3469	51.7364	45.6635
BC041363	6.57749	7.50511	5.87335	4.34342	3.99508	3.21625	3.94529	4.07384	3.61286	4.04281	4.35421	2.94428	3.58883
BC041998	8.70119	7.59392	9.41562	3.89051	3.2936	4.66354	3.68763	3.38058	3.81722	3.85648	3.99691	3.5272	3.78865
BC042029	7.98463	9.6682	9.2141	5.33898	5.19013	4.04991	3.53053	5.09369	4.46655	5.16177	4.79755	4.76617	4.61431
BC042366	15.7341	19.9589	15.1884	5.54359	4.7462	5.36796	4.99205	4.83818	5.37532	5.20449	4.83339	4.32727	5.17573
BC042374	8.03305	8.46632	6.9641	3.48321	5.57395	4.85205	4.69477	4.76054	5.35593	5.37721	5.00328	4.06001	5.67826
BC042590	17.285	11.5178	13.2567	8.21575	7.84397	5.52136	5.77153	6.28476	6.33641	9.34839	8.52424	6.59397	6.92581
BC043227	13.025	9.40941	12.2784	6.48046	5.90177	5.42624	5.39731	4.6852	5.40262	4.62397	5.4882	4.80771	5.06494
BC043291	9.92187	8.45742	7.37063	4.10249	4.00936	4.3118	3.28446	3.65094	4.01323	4.46246	4.87789	4.15639	4.30797
BC043356	8.17995	7.5346	7.59143	3.67504	4.11387	4.48352	3.35509	3.91873	3.57548	4.54941	4.17941	3.82717	3.90903
BC043540	8.94419	8.37017	9.78441	3.81389	4.06072	4.19638	4.55113	4.63593	4.30838	4.46103	4.46869	4.66677	4.45115
BC044596	13.1468	12.2744	12.5086	5.40269	5.23579	4.231	4.03588	4.85582	4.27074	4.40975	3.97102	4.07641	3.93554
BC044614	14.6355	12.8368	12.1343	5.7833	6.34331	6.38215	5.57626	5.7208	4.8322	4.84956	5.58337	5.28407	5.89634
BC045559	16.4607	11.6142	16.0365	5.6957	6.02058	6.44401	6.08846	5.80729	5.38822	5.97816	6.54323	6.09926	7.20847
BC045560	13.2358	21.555	14.117	5.44429	6.38493	4.44631	5.57119	4.7136	4.4	4.92713	5.04565	5.55837	5.26292
BC045779	7.5019	9.12315	10.6252	7.66477	4.98074	5.95518	5.63548	7.92977	7.0256	5.52418	5.88363	5.95357	6.22876
BC045784	14.3441	12.9904	11.5298	5.87531	5.02985	4.96013	4.86368	5.24249	4.1734	5.33631	5.13087	5.41006	4.29206
BC045788	13.9077	13.3753	12.3242	6.56268	6.58029	7.89069	6.88669	7.48723	6.52409	6.75371	6.55403	6.83433	8.02673
BC045789	9.43466	9.21842	14.3435	5.09946	4.07219	4.52211	4.04528	3.08917	4.2706	3.79694	4.37139	3.51255	3.62456
BC045791	11.2906	10.1521	8.93858	4.38032	4.72943	4.56048	4.54968	4.70274	6.19415	4.37763	4.62438	4.40124	4.71381
BC045805	15.2809	17.2771	16.0846	6.49261	6.63418	6.6371	4.83131	5.53759	5.18511	5.83771	7.39442	6.36535	5.38217
BC047364	8.85091	10.172	8.64084	4.4474	3.68625	4.32021	4.43517	5.64593	4.61631	3.87933	4.46373	4.35832	4.19719
BC047484	421.183	429.273	311.146	70.0707	75.3526	140.26	134.615	116.134	127.722	137.416	143.601	91.3045	95.7995
BC047615	10.4451	10.1316	9.55247	5.30019	6.64362	7.53424	5.12074	5.85713	4.34032	5.91259	5.06448	5.4798	5.45624
BC047626	7.10231	9.31255	7.85735	3.43825	5.47024	3.98381	4.78937	4.51298	4.09229	5.16825	4.35292	3.89728	4.23159
BC047644	10.6236	15.5683	12.7956	5.43398	5.41177	5.11117	6.42351	5.43313	5.46915	5.52759	4.28227	4.58998	4.63095
BC047651	14.1373	10.1335	9.84016	5.95841	5.91454	4.93569	4.28448	4.56887	5.62422	6.63646	5.84368	5.49878	4.62946
BC048132	10.4591	7.8782	10.8857	4.39425	5.91572	4.49932	3.8471	4.48552	4.41324	4.55638	6.0323	4.04266	4.49608
BC048141	11.8408	11.9319	9.75545	5.56409	5.64507	5.40205	5.56374	5.54879	4.98262	6.55937	5.60786	5.08445	5.48013
BC048420	16.1748	15.2556	14.1016	6.61939	6.39911	6.70818	6.15518	8.82254	7.67645	6.81208	7.17385	7.29933	7.36191
BC048997	6.68394	6.9718	8.25516	3.15588	4.12391	3.4359	3.41827	3.49667	4.08871	3.37109	3.44987	3.54272	3.22308
BC053951	12.5497	11.6278	10.7414	4.47194	4.82704	4.97694	5.53001	5.52706	5.57779	5.69152	5.37118	5.65357	5.3858
BC062753	1155.26	1296.84	1442.1	198.296	240.799	272.414	271.009	358.176	300.641	169.235	202.706	505.521	372.162
BC062763	34.9562	31.6786	28.4172	31.1389	28.7365	16.9786	41.2884	12.5796	15.2378	17.5544	26.0788	19.3455	23.2171
BC069004	11.3138	16.2087	16.1143	5.97782	5.57035	5.74494	4.86463	6.00123	5.29854	5.79697	5.97058	4.94028	5.85267
BC069739	11.9977	14.3736	10.1283	8.44129	10.3626	7.15837	7.75805	7.91139	10.0769	6.41926	9.73256	15.8247	6.90284
BC069756	8.48189	9.40223	7.59051	2.65933	3.29679	4.32235	4.25392	3.98271	3.41637	4.02838	3.13484	3.96288	3.26361
BC069776	9.77637	14.1195	11.2517	7.9429	6.33822	6.2668	6.6573	6.39529	6.28977	5.70713	6.28716	6.54036	6.3358
BC070118	9.41244	7.03004	8.25256	5.15921	5.38775	5.13543	5.23614	5.6019	4.92161	4.76224	6.12235	6.4127	5.91633
BC070490	7.99289	7.49155	10.466	5.4962	4.57239	5.10313	4.4975	5.57743	6.4223	5.06971	5.22893	5.51687	4.58135
BC079832	9.28777	8.79327	8.10745	5.51354	7.57051	6.56694	4.04379	4.81729	4.54776	5.79201	5.80421	4.48855	5.12935
BC113958	12.6	12.1658	9.443	5.01417	4.68941	5.95821	4.70203	4.44945	4.63499	4.88576	4.5736	5.64305	4.70128
BC130595	13.1792	14.5808	11.1309	5.50208	5.01969	6.9928	5.88499	5.43851	5.83029	6.1411	6.36817	6.30733	6.14621
BCAM	11.8637	13.8568	15.4149	11.078	9.66113	10.1638	8.59878	9.77065	8.96396	12.8729	13.3874	8.98359	10.7837
BCAN	11.9894	11.7169	12.7492	6.73544	8.26496	8.56729	7.89975	8.29581	8.09186	7.44261	6.76628	7.36806	7.54981
BCAP29	507.719	518.021	588.508	302.612	301.23	266.781	281.552	303.482	301.136	159.21	182.531	400.325	387.353
BCAP31	1222.56	1442.85	1583.2	2832	3055.06	2783.13	2693.2	1970.49	2011.56	2694.08	2640.71	2371.04	2387.32
BCAR1	64.872	68.2668	65.8088	191.733	176.953	73.085	68.9545	45.9642	47.0193	54.2538	51.5373	63.3318	65.8854
BCAR3	644.626	687.483	736.806	754.637	596.543	612.23	550.34	347.444	288.363	795.211	907.122	434.294	446.638
BCAR4	6.49733	7.06864	6.20839	3.37195	3.20641	2.94066	4.60532	3.66598	3.45668	3.7439	3.43166	3.50545	3.22948
BCAS1	27.983	18.9648	14.4072	8.76787	10.3019	9.60347	10.7343	10.7653	13.9488	14.3714	7.97418	9.53005	11.1139
BCAS2	2360.04	2566.13	2397.14	1041.99	1167.93	1531.68	1565.12	1317.84	1300.82	1448.34	1575.39	1796.84	1558.06
BCAS3	44.8436	49.5236	48.9301	28.856	30.9516	30.8838	26.1716	32.9381	36.2609	25.5451	28.7046	11.0547	11.7319
BCAS4	62.9344	54.8393	62.9668	22.6554	26.0643	32.1038	34.4414	20.3717	20.5246	30.3028	27.984	18.7759	23.1883
BCAT1	3212.86	3363.49	3362.7	258.841	220.591	503.007	515.341	178.43	151.583	367.411	400.053	902.103	815.695
BCAT2	112.316	103.646	129.837	228.348	228.98	337.244	308.994	106.317	112.413	316.885	337.956	109.902	116.489
BCCIP	808.56	767.776	645.424	1046.44	1088.16	504.768	484.099	623.836	654.888	608.449	697.19	495.532	439.757
BCDIN3D	33.4674	24.1891	46.5187	102.466	90.8858	44.294	35.2681	148.641	134.51	67.8794	82.856	76.1332	54.527
BCDIN3D-AS1	13.2341	13.8626	13.2176	6.12655	6.65521	4.85092	5.96745	6.01167	6.12358	5.96994	6.01277	5.44506	5.73767
BCHE	267.791	264.727	373.061	3.70124	3.17364	110.907	97.27	362.096	372.56	49.2963	63.7651	21.8493	18.9296
BCKDHA	239.857	286.552	238.365	75.2383	88.8313	270.02	248.389	151.64	202.978	259.964	198.156	177.44	185.079
BCKDHB	96.657	97.2754	88.2626	35.3107	36.4046	45.003	52.548	62.4823	64.2602	54.7405	64.8281	40.5772	39.094
BCKDK	142.924	126.865	185.242	335.208	369.665	233.215	230.21	147.614	171.057	188.914	186.873	153.263	165.179
BCL10	663.644	675.408	651.486	196.824	195.199	180.866	193.616	158.689	123.494	146.97	168.721	228.551	231.255
BCL11A	171.2	159.377	127.063	4.89514	5.50261	4.83237	4.88055	4.71051	5.26312	25.1506	21.5892	4.75876	4.84842
BCL11B	9.38296	10.6459	8.78312	4.98885	4.74612	4.44778	4.73177	4.9957	4.44053	4.94999	5.26677	5.75311	4.63909
BCL2	30.5808	29.3271	29.988	9.21897	9.29939	28.6716	30.598	47.9534	34.8514	20.5153	19.8339	14.7426	13.9672
BCL2A1	6.5037	7.77474	15.2508	5.92128	5.59247	4.71569	7.1794	197.541	238.782	6.3613	4.08752	9.67061	6.12095
BCL2L1	145.212	152.498	191.705	182.647	156.045	343.358	302.789	87.4142	76.8654	220.031	214.608	102.248	89.564
BCL2L10	10.5294	9.71294	10.1177	5.75412	5.26386	5.301	5.03879	5.4206	5.86775	5.35328	5.75188	5.45858	5.38222
BCL2L11	88.5446	82.8206	72.7414	26.232	22.9512	20.8714	21.963	23.1465	32.2762	34.7886	33.411	44.9199	46.2404
BCL2L12	85.0699	69.1017	56.8976	246.38	263.479	369.228	345.187	203.564	187.044	221.768	204.586	209.18	175.158
BCL2L13	185.79	178.663	204.386	128.779	126.696	115.208	110.732	189.541	198.177	204.078	192.896	115.197	119.808
BCL2L14	8.46754	8.65508	8.76045	4.07177	3.97962	3.76036	3.60471	3.73187	3.82791	3.68095	3.76018	4.04443	3.88913
BCL2L15	9.70986	9.61142	10.1918	4.9011	4.31726	4.2583	4.90424	5.38574	4.91049	5.21247	4.7003	4.31163	4.98804
BCL2L2	88.5662	98.9562	108.416	137.036	137.786	73.6226	68.8317	95.0187	98.8785	110.874	95.5446	114.5	116.998
BCL6	320.713	325.946	413.868	64.0196	77.7896	90.7896	89.2027	238.168	229.711	137.621	143.836	156.093	163.349
BCL6B	19.3134	18.1093	16.9195	7.99294	7.94644	9.5925	8.33307	7.9556	8.49704	7.68997	8.50225	8.32632	7.97656
BCL7A	37.7883	41.2665	35.3615	17.8019	20.9383	30.9131	35.4164	7.61788	8.06679	23.7077	19.2694	17.3938	14.2997
BCL7B	196.695	145.841	185.755	603.422	557.544	265.405	275.79	418.938	450.405	271.777	246.939	633.599	622.909
BCL7C	115.578	108.946	98.8553	191.065	209.105	511.203	464.227	270.15	322.572	398.407	338.102	366.828	344.823
BCL9	69.8538	71.8334	60.6898	6.79635	7.9706	6.99271	7.07029	16.3223	20.567	9.98242	9.99171	13.7812	19.7022
BCL9L	78.2389	68.484	100.853	89.596	97.7217	66.7474	73.5531	42.481	52.082	50.6609	41.9396	119.53	110.842
BCLAF1	1800.79	1851.63	1571.43	808.181	820.044	764.222	717.982	596.1	575.817	681.557	752.406	541.873	523.885
BCMO1	14.4514	11.5248	11.4397	4.04231	5.29621	5.14799	4.47891	5.21062	4.4104	4.88385	5.48524	3.86009	4.3018
BCO2	9.78091	9.12883	7.3184	5.37975	5.06716	6.05071	6.40941	4.92676	5.22346	6.28628	6.27797	5.47472	5.46794
BCOR	58.1942	69.8805	49.7381	101.531	112.402	77.483	91.3769	90.121	64.0886	91.6069	92.7736	120.684	118.003
BCORL1	40.6804	30.5052	44.6679	25.364	23.7414	18.2033	22.5413	14.717	13.8529	16.8729	16.4353	19.0618	18.104
BCORP1	9.96242	9.40284	9.06124	4.34818	4.43077	6.07559	4.23794	4.90945	4.64285	6.52509	5.21382	4.52783	6.17029
BCR	148.423	153.21	198.944	50.7036	55.5975	122.497	142.592	89.292	98.7601	80.5069	76.9416	56.796	53.2135
BCRP3	15.7528	12.9906	12.9511	6.12447	6.00062	5.39171	4.81344	6.03295	7.10695	5.48672	5.16808	5.85797	6.87257
BCS1L	472.835	434.764	431.063	579.917	504.718	195.608	218.818	564.058	659.87	407.096	402.403	426.808	406.687
BD495725	48.5983	141.207	199.278	4.15272	4.42437	4.19724	4.76492	4.38692	4.02544	4.96284	5.54944	4.57638	4.44555
BDH1	16.4142	12.04	14.0914	108.659	138.413	220.012	348.315	17.6049	19.831	57.1497	55.4282	58.6186	51.1015
BDH2	681.037	781.882	677.911	100.209	119.54	102.382	95.9468	178.323	266.828	83.6666	91.4235	250.669	239.546
BDKRB1	14.2547	12.585	10.0899	10.0921	10.3232	75.5482	132.81	5.87645	3.85141	20.3354	11.7243	145.915	113.782
BDKRB2	15.0086	15.3798	11.8367	9.57807	11.9528	6.68773	6.05521	4.4622	4.84087	12.0039	13.129	11.4653	12.1151
BDNF	1622.49	1558.61	1798.37	378.416	390.092	360.991	416.385	17.8175	12.8533	170.01	196.69	214.139	217.752
BDNF-AS	149.41	173.45	181.537	18.371	34.9854	14.9127	11.3636	5.5976	4.88203	6.53911	8.5522	7.3408	6.70368
BDP1	734.509	729.102	640.844	206.175	213.882	226.672	226.76	185.793	154.38	202.588	231.74	142.806	141.269
BEAN1	13.0035	14.6557	12.3029	3.52303	3.87523	3.82677	3.99355	3.90317	3.91616	4.89009	4.96436	4.40477	5.2873
BECN1	587.457	577.422	600.574	400.022	417.077	373.27	412.024	483.903	451.464	572.754	566.134	302.684	280.485
BEGAIN	39.5695	41.4405	52.5737	9.12828	7.9331	7.39639	4.87663	8.5743	7.79986	14.148	16.1429	22.5256	21.9627
BEND2	11.5928	16.4715	14.7421	6.89378	7.64604	7.84289	6.19261	6.31131	6.26232	9.50519	6.75927	6.80986	7.51561
BEND3	103.162	78.2493	83.0673	73.99	62.2786	73.8259	78.6314	33.222	34.2489	37.8121	41.126	40.9849	42.937
BEND4	59.2173	36.8031	15.1386	5.29202	4.84842	4.43113	4.25538	5.71274	4.77544	4.68235	4.52478	4.52764	4.07087
BEND5	27.5606	27.8781	27.501	5.76454	4.84825	5.79921	5.4113	5.11529	7.06136	7.43609	8.03392	14.6714	20.8442
BEND6	252.465	273.47	287.022	13.7605	14.6447	15.297	13.3992	40.6134	48.0861	18.6474	23.3492	58.0828	51.6262
BEND7	103.694	99.1429	161.004	6.76132	6.72457	79.9234	73.4261	6.63422	4.78902	30.3047	36.9734	5.95854	6.72948
BEST1	13.7724	15.0609	16.9047	5.81322	6.18624	6.46388	5.66544	6.55713	6.06922	5.83599	5.43269	7.07391	7.31976
BEST2	9.12657	11.3397	11.0797	3.81749	4.23416	4.45994	4.539	4.44575	4.60023	5.04478	4.42017	5.17344	5.39514
BEST3	20.097	21.3764	16.1991	5.26555	5.46739	5.49421	5.6507	4.87486	4.98904	5.20924	6.47968	5.76521	5.30702
BEST4	9.97284	12.2124	10.8053	4.61997	5.9304	6.28321	6.36063	5.74958	4.55342	5.65593	5.99784	5.41916	5.00977
BET1	1015.28	1033.96	1146.42	564.702	510.828	495.837	495.282	347.073	394.156	394.04	465.298	1198.86	1070.12
BET1L	148.495	197.162	199.488	81.759	84.951	94.9956	83.1836	45.3561	44.7028	76.3259	56.6649	66.3669	52.2285
BEX1	5117.38	5157.41	4335.71	270.375	261.863	1459.82	1493.85	36.8883	24.3356	6392.1	6518.94	618.851	580.612
BEX2	624.194	547.873	789.15	12.3728	9.25262	514.833	558.171	48.3794	44.2356	43.7308	53.0494	48.8821	49.8894
BEX4	2019.05	2014.4	1832.76	3.9313	8.86876	215.434	228.793	8.68361	9.58051	126.47	146.813	270.035	240.405
BEX5	73.1502	90.9249	57.7232	5.75474	7.01473	125.181	113.486	4.60157	3.53138	6.41836	12.1972	10.1898	13.4327
BFAR	517.292	481.03	438.771	627.949	553.589	691.428	785.257	584.034	596.127	535.252	520.045	611.716	569.146
BFSP1	37.6906	35.7999	45.4623	22.1659	35.1257	10.7262	14.8809	167.435	308.014	8.98356	14.3366	13.9353	13.1761
BFSP2	11.6907	10.4788	10.9656	4.37981	5.5227	5.71551	4.90394	5.20127	4.93578	5.35335	5.95795	4.53038	5.30933
BFSP2-AS1	9.78378	9.53639	8.74598	5.08541	5.35008	5.6406	5.22744	4.59397	4.61228	4.91936	5.00046	4.32536	4.97945
BGLT3	17.3873	15.2456	15.2436	8.31729	7.08584	7.7091	9.94032	8.51737	7.45584	8.94727	8.2942	8.20516	8.93767
BGN	1048.8	1006.96	1009.54	173.125	224.215	10.0273	8.4758	8.26807	9.24791	63.6432	64.7633	1304.78	1252.91
BHLHB9	105.432	91.5079	97.1309	13.7727	9.94954	24.171	23.2073	6.50934	7.91385	65.7752	61.7978	206.955	178.696
BHLHE22	14.7805	11.4346	10.4673	6.12216	7.73626	4.91949	5.19043	5.49951	6.46358	5.28895	5.43473	5.87427	7.32816
BHLHE23	7.67746	7.58062	7.65271	3.45461	4.10803	4.07124	3.6606	3.44393	3.58198	3.87916	3.60284	3.65843	3.70166
BHLHE40	230.243	275.532	239.083	567.768	686.951	810.308	680.04	306.63	355.24	227.885	218.176	779.57	729.33
BHLHE41	360.865	319.098	397.837	6.79075	7.21573	29.6381	19.6525	41.5452	30.202	81.8472	86.3605	87.411	105.824
BHMT	8.62451	10.4081	14.3971	4.27492	4.65015	4.96049	5.18932	3.82831	4.64788	3.72052	4.41324	4.44039	4.29906
BHMT2	21.1318	19.9439	22.7518	5.42559	4.41409	5.83667	5.06099	5.5929	5.36989	5.84575	5.18717	5.30301	6.62548
BICC1	567.371	589.395	649.467	59.2084	75.7667	7.98772	10.564	58.8061	23.2543	170.646	182.733	133.567	157.843
BICD1	550.394	554.15	580.18	38.1726	43.8766	30.9041	36.1814	142.652	150.725	42.1888	41.7457	15.8318	15.1625
BICD2	695.623	700.766	653.676	197.356	186.874	203.28	208.015	287.763	253.766	175.29	183.021	413.284	387.572
BID	315.758	293.36	370.553	498.006	527.553	291.39	297.834	109.702	123.088	378.216	405.719	350.378	352.529
BIK	10.67	12.9624	9.68804	6.04162	6.09429	6.3932	6.13019	5.50529	5.25739	7.03747	8.56114	5.46396	6.55012
BIN1	268.025	285.867	269.763	107.844	129.579	85.0962	85.1344	103.114	109.966	102.324	102.255	311.898	293.066
BIN2	10.7344	9.02548	10.6115	5.866	5.6337	5.19263	5.53446	5.14669	5.23318	5.00198	7.03909	6.5663	6.29087
BIN3	127.03	116.939	98.9527	84.3131	78.4177	100.623	105.924	478.503	564.881	133.582	102.31	148.599	131.491
BIN3-IT1	40.0912	33.9784	33.1024	9.59652	8.05275	8.4217	9.54981	11.5194	17.33	11.4407	12.4911	9.3036	8.3683
BIRC2	4568.26	4907.87	4863.1	1349.12	1369.24	1714.28	1740.42	759.507	693.744	1480.93	1576.9	948.28	928.065
BIRC3	36.5276	43.5379	45.5295	6.16221	6.02131	10.3425	11.949	4.91595	6.0726	20.2195	26.3338	5.82636	6.60249
BIRC5	248.778	182.183	129.757	928.221	901.26	743.87	820.136	1902.46	1819.02	1006	926.478	640.558	672.147
BIRC6	851.812	878.748	903.895	528.97	625.189	306.421	348.785	474.294	419.659	365.078	396.429	671.854	645.569
BIRC7	32.0178	26.9025	31.4677	14.6532	16.1492	18.7428	18.395	15.7643	19.5949	18.5364	18.008	16.4221	17.7237
BIVM	209.526	199.971	216.538	35.3879	35.6602	38.6012	38.8102	52.3543	56.0429	100.825	101.812	33.2608	32.3785
BLACAT1	45.3569	23.7796	20.4503	5.11984	4.69039	5.60237	5.55487	63.905	52.5763	5.1032	4.08479	4.17393	4.79552
BLCAP	2117.3	2196.05	2507.71	1100.81	1045.78	861.199	867.711	488.989	504.846	888.913	973.626	1254.63	1134.53
BLID	160.8	193.767	124.313	5.7241	4.46603	4.54626	4.66823	3.72817	3.71588	5.22988	4.78478	4.19475	4.1841
BLK	7.60635	7.23482	7.91027	4.49582	4.49678	4.5896	4.4859	4.16701	4.76584	4.72576	4.46163	4.2054	4.40578
BLM	179.782	109.106	54.986	361.148	399.788	208.041	195.321	301.801	323.406	112.727	116.12	89.3518	81.1698
BLMH	559.609	539.824	469.773	640.613	636.873	488.806	492.592	375.806	440.677	547.815	497.36	253.906	221.604
BLNK	8.69031	7.73914	6.21111	2.6735	2.96129	2.90415	3.05699	3.26156	2.96752	4.40715	4.25846	3.04014	3.5505
BLOC1S1	219.517	183.533	188.743	296.944	384.615	303.287	335.365	741.85	882.786	368.232	328.269	425.881	401.473
BLOC1S2	1914.84	1906.45	1961.88	1514.65	1529.23	870.53	938.257	804.677	772.951	1174.62	1266.57	815.859	759.363
BLOC1S3	71.5536	67.7953	64.1798	25.9413	32.8421	73.7752	80.6954	33.5938	30.1595	53.8601	55.7494	63.071	54.8445
BLOC1S4	468.579	544.933	469.866	664.84	659.171	333.325	290.847	308.736	326.127	247.296	307.438	410.343	402.837
BLOC1S6	1236.54	1272.99	1245.4	400.671	405.386	558.397	571.829	581.25	554.059	386.525	487.217	548.498	534.003
BLVRA	863.411	847.412	899.162	371.498	408.851	621.645	612.754	352.79	393.549	348.474	375.158	372.39	372.497
BLVRB	277.494	300.468	277.563	1353.96	1223.53	584.048	488.074	489.073	493.845	925.704	1017.22	867.035	766.902
BLZF1	98.5953	116.646	125.974	50.4812	52.0561	128.063	138.019	122.738	90.6381	90.0171	134.364	122.325	120.182
BMF	17.9336	21.4247	17.1762	6.79162	9.47286	10.1684	7.55458	9.70275	12.3359	66.9886	63.0615	13.7526	10.987
BMP1	126.814	105.85	92.6022	14.755	19.0097	37.7907	32.3162	23.6045	26.0385	164.507	159.699	104.358	104.588
BMP10	8.98169	12.2632	9.65723	4.85279	4.08168	4.38323	4.44487	4.52239	3.55556	4.07461	4.54291	4.43642	4.38432
BMP15	9.30236	7.97616	9.15936	3.75507	3.24133	4.24596	4.31861	3.64271	3.20608	3.66845	3.64672	4.46276	3.53859
BMP2	208.282	263.39	102.069	13.2205	17.9328	10.4243	11.5629	12.7523	11.364	11.9328	12.8021	10.1346	9.02471
BMP2K	157.233	123.229	144.913	42.9467	35.8338	62.5917	60.4716	31.2397	23.0636	41.7488	44.5975	87.2178	89.4787
BMP3	8.06207	7.73397	8.26945	4.61543	4.71125	4.30123	5.17692	4.71956	5.83299	4.69181	5.3097	5.72269	4.47898
BMP4	561.486	623.836	557.379	102.908	178.269	11.5921	10.2421	45.9425	50.7071	122.804	127.994	18.5708	20.8733
BMP5	8.34098	8.51792	7.45786	83.3746	95.5526	4.94251	5.09208	4.18214	4.10292	4.15547	4.68347	4.37226	4.05522
BMP6	56.2789	47.6645	31.2477	4.93924	5.85839	4.43353	4.49798	4.64597	5.38781	333.752	332.967	5.32183	4.56418
BMP7	20.5442	23.8322	16.2871	40.0046	40.1997	7.95335	8.26125	8.66015	8.35176	9.81807	8.15642	7.0163	7.97682
BMP8A	37.285	38.1002	38.6158	4.90325	4.89394	4.84796	5.27635	5.10629	6.21155	5.06766	5.23707	5.13362	5.63314
BMP8B	12.5287	16.7727	11.5386	7.88859	7.46723	9.22952	8.23669	120.155	122.091	9.33389	10.4735	8.6349	8.94715
BMPER	14.3139	10.6038	14.6455	2.96258	3.85914	2.75762	4.26568	3.25186	4.31445	3.66154	4.34234	38.8172	46.7013
BMPR1A	593.204	556.455	620.287	176.713	191.207	190.078	188.03	145.763	127.609	188.934	231.218	170.836	167.612
BMPR1B	112.223	157.313	110.83	6.61916	6.20158	6.25976	7.81676	53.1117	40.3323	9.20837	9.66171	22.5812	23.4792
BMPR2	715.579	818.636	848.602	65.6544	77.2176	90.4859	93.7317	88.4619	72.0846	202.187	220.362	222.445	196.128
BMS1	1041.86	993.998	719.778	680.93	707.202	388.664	416.177	550.998	580.142	486.351	521.516	381.342	392.199
BMS1P20	262.211	250.727	277.293	54.5337	54.1053	105.878	91.5397	119.729	124.347	99.0621	122.677	97.3113	74.9694
BMS1P5	49.0272	45.8126	45.3305	56.467	46.1462	35.8533	47.6662	28.9667	41.4698	33.7944	34.3346	32.0347	33.8272
BMS1P6	242.448	222.539	190.85	23.2873	22.2391	11.541	14.8478	14.9261	15.6266	9.35883	9.13165	9.72754	7.48661
BMX	8.40954	6.91233	6.81886	4.1283	4.24528	3.80133	3.98678	3.9622	4.08456	4.06375	4.02868	4.2208	3.6711
BNC1	141.071	112.412	204.308	4.68758	3.98134	4.91762	4.76608	4.23648	4.22248	5.09256	4.48515	6.48949	6.43815
BNC2	206.802	223.047	250.077	22.5292	16.4919	48.0816	52.1867	23.0303	18.2043	55.0418	62.7172	152.691	138.177
BNIP1	91.0959	81.9491	104.168	136.102	103.331	127.605	115.972	105.857	109.85	112.095	117.607	75.041	77.4883
BNIP2	1151.81	1293.2	1212.58	313.539	367.428	418.203	462.365	372.004	342.249	278.516	303.384	340.308	385.207
BNIP3	994.802	980.94	2646.45	3204.84	3241.91	914.318	932.71	1142.24	1074.86	873.862	934.321	1689.79	1583.86
BNIP3L	2199.06	2217.85	2923.75	1506.44	1680.77	1172.12	995.751	572.28	607.553	1299.13	1557.44	2191.17	2285.75
BNIPL	8.20021	8.49928	9.98494	4.36301	4.38035	4.56837	5.15808	4.47533	4.88329	4.21798	4.71166	4.32195	4.86621
BOC	52.0198	37.8634	52.9816	8.98453	9.574	15.0903	17.1116	10.1179	13.2697	27.8643	25.99	35.2737	35.7886
BOD1	1648.47	1431.17	1420.68	559.928	531.303	1316.61	1312.84	688.309	680.172	1579.22	1625.22	1196.43	1192.41
BOD1L1	207.031	231.222	199.01	234.377	237.071	143.739	173.102	152.442	135.413	94.5912	111.961	103.486	99.4941
BOD1L2	10.0421	12.9925	14.946	5.30064	6.51622	6.15593	5.57186	5.33541	6.19225	6.26216	7.79618	5.88324	5.39502
BOK	587.113	547.155	631.507	65.7361	66.7052	124.219	115.714	20.5623	17.6013	195.496	169.174	12.1555	11.891
BOLA1	81.5992	54.3982	89.3421	47.7816	59.037	62.2344	49.9707	87.8131	108.87	48.382	48.4613	70.6911	63.8187
BOLA2	26.9744	26.3108	22.7787	21.9214	21.1821	12.9344	12.2053	17.6485	12.8409	8.05671	9.45502	11.4832	12.1197
BOLA3	2750.7	2485.98	2391.23	2772.53	2770.49	1322.32	1429.11	2192.45	2216.04	1577.82	1549.32	2003.4	1910.29
BOLA3-AS1	20.8877	16.1311	14.9944	14.0052	12.7586	9.64229	10.9156	7.56838	8.28922	10.3977	9.09233	13.0953	12.3309
BOLL	7.8214	8.28017	8.83876	4.75878	6.04207	5.22643	4.81535	5.91553	4.49759	5.42221	6.83754	4.9217	4.55382
BORA	96.5417	106.209	92.5421	401.174	377.439	269.949	266.725	411.324	468.149	203.865	240.703	304.155	264.344
BPESC1	9.16755	8.94702	9.92789	4.46423	4.39557	4.05882	4.13599	4.17796	4.56542	3.7125	4.76095	3.90014	4.71575
BPGM	812.821	697.074	798.869	110.567	155.831	85.5369	96.759	200.953	155.333	541.329	583.996	275.356	256.514
BPHL	205.983	201.763	181.982	42.5131	57.2182	48.12	41.8512	48.611	45.4087	113.102	93.083	98.5426	94.0468
BPIFA1	10.0496	9.48994	11.1348	5.40774	7.1499	5.98401	4.99794	6.43006	5.17314	6.89387	5.11096	5.93166	5.95253
BPIFA2	11.803	9.2319	9.94616	5.24538	5.3	6.08426	4.87864	4.70123	5.4484	5.28566	5.68825	5.16076	4.84311
BPIFA3	18.6031	20.0014	18.437	4.59654	5.65624	4.67017	5.31411	4.95222	4.95355	5.17333	5.77982	5.39079	5.59462
BPIFA4P	9.63364	9.31655	9.81159	4.92231	4.15676	4.13676	3.93448	4.28785	4.35177	4.20308	5.09152	5.69068	4.53723
BPIFB1	6.6066	7.72983	8.6718	4.881	4.73824	3.60374	4.39258	4.0729	4.36211	3.90352	3.87901	4.87237	4.79788
BPIFB2	7.70806	8.90186	9.92426	5.00261	5.94278	5.95498	6.04942	6.34008	7.73596	6.15764	6.29068	7.87425	6.96284
BPIFB4	7.99996	6.58574	8.76905	3.64672	4.74815	4.25596	3.81705	3.94916	3.53205	3.83429	3.72234	4.03644	4.01401
BPIFB6	7.59051	7.03328	8.3169	4.08117	3.44589	6.05238	4.91177	4.32188	3.97975	4.26624	4.90877	4.34417	3.98276
BPIFC	7.92286	9.18072	8.31216	4.51403	5.54628	5.4693	4.37524	4.93814	6.669	4.70329	4.8872	5.1382	4.22378
BPNT1	114.625	136.153	118.381	13.0022	17.2566	18.7573	16.8756	25.0251	33.1544	10.1557	13.8765	22.8885	29.1609
BPTF	593.047	598.621	584.474	230.829	202.01	241.428	251.269	199.264	215.948	206.653	247.709	151.869	149.188
BPY2	8.40931	7.30736	8.20959	3.40563	3.78065	5.29163	4.77619	3.64386	4.5458	3.83441	4.29942	4.58196	5.04467
BRAF	111.999	117.496	112.141	42.8199	53.1606	34.1591	37.6878	39.951	40.9968	30.7087	29.1623	85.5955	81.1875
BRAP	257.079	265.905	254.905	104.314	106.239	64.9479	59.7426	64.1617	64.8777	64.126	71.2403	60.2599	64.4126
BRAT1	26.3628	22.5445	26.3386	40.0345	35.8916	61.8632	60.7518	49.0467	52.7475	26.2086	20.1767	44.1613	53.5736
BRCA1	79.0354	64.1609	51.5716	258.103	239.995	121.428	143.03	156.565	151.206	108.993	107.445	123.769	112.653
BRCA2	15.869	16.6074	12.5403	100.253	75.5369	81.1519	95.0811	50.2747	48.848	68.223	81.8917	45.1511	57.9666
BRCC3	229.016	289.317	276.673	658.615	725.311	327.813	337.164	369.368	373.729	430.265	459.668	414.914	399.059
BRD1	459.182	458.899	491.157	202.861	199.697	349.148	357.625	309.455	261.85	337.937	365.705	205.418	208.786
BRD2	792.403	776.907	688.356	755.411	769.441	638.721	620.522	641.196	726.383	396.284	479.647	411.773	384.062
BRD3	655.116	660.999	587.165	144.721	153.869	205.564	217.849	107.654	130.49	135.602	138.608	224.366	229.653
BRD4	288.339	286.25	261.697	185.326	168.547	281.709	303.877	125.108	120.943	183.16	192.574	171.045	187.434
BRD7	312.375	271.357	274.135	293.404	313.296	286.899	284.342	216.616	216.852	220.755	239.132	147.258	128.88
BRD7P3	9.69791	12.2813	10.8375	4.87988	4.81864	5.37507	4.98592	4.86822	4.76335	5.50409	5.29423	5.24454	4.66153
BRD8	492.543	463.504	374.775	411.743	465.766	354.996	369.514	371.95	431.316	335.695	356.525	175.501	160.777
BRD9	587.949	482.657	502.22	683.239	648.08	466.186	475.944	605.483	648.278	537.367	495.783	347.485	343.824
BRDT	15.7813	14.4163	14.1954	6.12641	6.60947	4.84955	5.01105	5.73922	5.88917	7.1061	6.04675	6.39649	5.47527
BRE	459.226	405.833	477.72	314.419	309.589	168.452	161.418	311.135	351.894	297.369	294.343	480.346	531.207
BRE-AS1	10.8566	9.59475	11.5846	5.73963	5.11571	6.2241	4.19935	6.9411	5.1046	5.7998	8.10896	6.299	6.28428
BREA2	8.69716	10.1616	10.7954	7.05392	4.90234	5.78835	6.60362	7.15033	5.9348	8.46862	6.22282	6.16767	5.56124
BRF1	13.9733	13.6454	13.3815	18.6279	20.5205	10.8451	12.4402	10.7677	12.1052	11.5207	12.118	9.12938	9.49287
BRF2	145.853	130.504	142.717	80.6192	89.6107	75.8894	90.7661	110.238	117.536	141.03	120.221	193.968	196.177
BRI3	716.417	696.497	888.102	228.727	238.48	894.995	851.02	420.264	361.327	579.434	528.74	1494.72	1419.84
BRI3BP	1200.51	1345.42	1371.91	871.828	783.373	619.589	682.66	547.201	465.109	289.514	305.373	249.533	234.708
BRICD5	45.1525	32.4584	46.9122	10.1968	9.87456	13.6512	9.91634	19.4134	18.9546	10.1123	10.413	11.0247	11.6974
BRINP1	27.7063	25.4829	18.345	4.70648	4.6595	43.1883	33.3531	4.47124	4.74714	5.21108	5.19811	5.50948	5.28415
BRINP2	8.32488	11.1563	12.0866	4.50639	5.47603	4.04028	4.18164	6.42815	4.73519	9.55765	8.66953	4.20236	4.09966
BRINP3	11.4001	10.1717	9.03043	4.6506	5.52296	4.38436	4.775	4.42228	4.34433	4.92024	5.12238	4.0406	4.54623
BRIP1	249.957	245.623	183.912	130.872	117.891	221.586	278.641	145.007	114.785	119.831	141.401	140.394	141.551
BRIX1	305.123	282.007	224.463	251.569	242.775	139.754	149.519	213.657	193.939	138.285	148.207	79.3603	77.7984
BRK1	1302.65	1346.67	1401.06	1303.94	1434.86	1073.93	1086.49	974.997	982.094	1006.13	1095.73	1709.5	1508.9
BRMS1	306.173	206.48	236.194	239.975	264.553	291.161	239.352	282.695	307.187	317.504	243.519	188.994	186.04
BRMS1L	663.151	629.186	680.598	188.241	178.892	221.179	222.412	246.92	223.836	316.417	347.647	242.623	350.981
BROX	554.829	533.555	583.716	275.532	263.819	333.248	323.975	540.248	478.233	185.834	211.386	426.368	422.311
BRPF1	136.762	117.397	111.435	149.096	159.473	147.578	116.751	138.733	119.656	68.8733	82.0886	176.726	135.823
BRPF3	55.0658	50.5967	66.2888	63.2231	52.8169	38.3617	42.5909	35.672	23.1919	26.7137	27.3062	38.23	35.8614
BRS3	7.06432	7.31676	7.92658	4.69565	4.4625	4.54667	4.15223	4.98623	4.54519	4.27446	4.73954	5.2358	4.19254
BRSK1	15.4778	16.117	18.6072	12.1489	11.425	13.7729	12.7099	12.5684	16.6557	14.0694	11.7856	12.3883	12.4323
BRSK2	12.3735	11.4027	13.4971	6.36579	6.16052	5.27527	6.19814	5.20784	5.40826	9.03327	8.17254	6.11024	5.23578
BRWD1	94.6081	108.957	108.439	19.9102	25.2369	25.8186	28.684	24.7404	22.7415	32.6922	34.3146	28.3971	22.7139
BRWD1-IT2	10.5389	11.4286	14.5167	6.78166	7.62198	7.7496	8.33142	7.433	7.32906	6.62149	9.24438	10.2827	7.67971
BRWD3	122.586	128.791	119.794	69.667	72.3363	16.9729	17.3543	28.5305	26.1034	38.044	38.8668	18.9108	21.6802
BSDC1	441.482	434.253	463.432	200.098	201.768	371.389	360.606	181.29	192.761	305.625	301.206	259.788	294.123
BSG	591.381	584.283	695.045	1149.74	1337.06	2459.99	1993.21	1216.65	1419.35	2629.92	2271.32	1323.8	1431.66
BSN	16.288	13.1858	13.4997	3.89339	4.96659	4.92694	5.06355	3.72849	5.99826	5.39336	5.74648	4.55418	4.64219
BSN-AS2	7.88103	7.69325	10.0556	5.17887	4.86815	5.50311	4.91803	7.57699	5.21423	6.09312	5.39687	5.299	5.63386
BSND	10.0457	9.40421	9.33102	5.47114	5.55248	5.22982	5.59787	6.02353	5.02125	5.98472	5.43747	5.93096	5.5654
BSPRY	9.6907	9.00595	8.44568	4.89435	4.8674	4.94067	4.86425	5.35709	4.99886	4.57452	4.8914	4.99355	5.29709
BST1	379.067	416.839	240.546	4.34826	6.2465	67.1239	72.2679	5.48137	4.37357	217.121	233.117	17.9283	20.7229
BST2	16.0809	9.15079	9.21303	169.846	246.367	17.1118	17.0565	6.90338	10.6254	1233.12	1222.9	481.51	536.263
BTAF1	1424.29	1412.49	1354.32	632.044	605.606	376.2	396.781	666.16	629.406	634.706	691.971	432.776	416.979
BTBD1	3762.39	3791.73	3841.88	1684.65	1682.86	1423.38	1485.95	1032.39	966.452	1025.22	1127.28	1207.79	1179.41
BTBD10	2155.98	2127.51	2125.19	479.457	551.472	650.867	769.198	277.701	268.588	419.815	492.575	283.711	244.528
BTBD11	114.331	132.349	120.443	13.0184	10.3099	8.95863	8.89878	5.36919	4.22431	5.43428	6.24818	4.423	5.11823
BTBD16	7.00877	6.93889	6.87485	3.27307	2.89145	3.89845	3.15374	5.67782	4.11719	3.47232	3.41187	3.46034	3.17147
BTBD17	6.73129	8.48871	10.1964	4.25297	5.96607	4.49667	5.04394	5.02552	4.4723	6.25096	5.76203	5.77645	5.4012
BTBD18	6.277	5.43566	8.0248	4.18526	4.4177	4.57141	5.32087	3.43866	4.33875	5.43304	5.62403	4.19256	4.16816
BTBD19	62.787	55.586	69.6692	12.5646	16.636	28.8102	34.4076	17.0356	15.6605	14.5087	11.5177	35.7298	38.6923
BTBD2	53.9614	36.9203	50.5607	39.3176	36.0042	109.04	105.958	59.3272	60.6118	66.1859	47.1716	65.9028	70.7017
BTBD3	1530.36	1504.2	1470.7	178.462	172.78	593.136	628.95	1277.38	1084.99	644.781	740.888	335.996	354.199
BTBD6	832.542	695.811	806.543	644.559	663.402	552.845	502.428	489.531	471.749	601.27	480.988	468.074	472.686
BTBD7	310.315	312.125	301.224	77.9484	63.6802	43.56	45.3952	55.8016	43.7228	67.4897	78.668	68.6507	62.532
BTBD8	12.3282	11.5895	11.3908	7.73308	5.80767	7.34862	4.79602	5.41234	5.74128	4.30816	4.88209	5.59205	5.69839
BTBD9	23.8776	22.7318	28.1021	6.83934	8.0156	8.31574	8.4653	6.55128	5.87402	9.5175	10.8041	8.89176	9.30155
BTC	10.2876	12.0554	12.0935	4.2244	4.9561	10.8633	12.0503	5.76403	5.67422	6.16688	5.75059	5.51457	4.39094
BTD	44.4907	42.2693	48.2316	39.1471	40.2555	66.792	62.7038	36.3883	38.0643	16.6258	15.387	43.0032	38.9288
BTF3	6509.58	6130.46	6165.87	5127.81	5316.59	4426.47	4540.21	4866.87	4951.24	4401.39	4822.67	3426.86	3253.46
BTF3L4	599.893	562.053	547.458	458.555	439.113	361.021	386.74	373.352	354.393	372.827	394.708	406.85	390.312
BTF3P11	9.19789	15.3762	9.21893	7.00629	6.34698	5.63195	7.16131	6.21338	6.68629	6.5092	7.01927	6.39209	5.96432
BTG1	872.154	838.636	864.699	977.916	1035.24	257.446	260.131	843.372	869.272	794.107	800.825	499.254	482.851
BTG2	182.906	230.293	152.073	7.12555	8.03826	8.90352	6.09648	7.81314	8.1271	18.719	17.1127	7.26032	5.94083
BTG3	688.409	685.438	604.123	382.993	357.413	617.379	622.569	731.203	729.228	558.994	625.697	951.954	911.908
BTG4	7.25781	8.05354	7.28546	3.83344	4.23007	3.98997	3.55941	3.75272	4.03316	4.72903	4.52555	3.9915	4.16842
BTK	28.6016	17.7043	24.5741	5.10403	5.16447	7.16308	6.0591	6.46717	5.68918	5.7558	5.42938	5.78444	5.67989
BTLA	9.26915	11.3887	11.2317	5.35268	5.4201	5.33741	4.75439	5.01925	3.61845	4.02754	4.53488	4.54097	4.65125
BTN1A1	6.0463	6.28554	6.33366	3.4046	4.06007	3.47297	3.61906	3.24419	3.34107	3.79892	3.88078	3.66368	4.46065
BTN2A1	476.617	540.362	491.213	342.445	325.069	323.322	326.983	164.125	168.253	203.874	218.373	196.678	184.66
BTN2A2	168.378	165.369	164.36	59.0656	51.1226	66.9927	60.925	53.1343	63.4387	63.0155	58.2861	25.9113	20.3053
BTN2A3P	13.8725	13.7059	14.1485	8.32523	6.46117	6.52699	7.89965	6.14993	7.23348	6.18005	8.40699	5.97616	5.92834
BTN3A1	79.874	68.0852	70.9855	48.9078	55.7076	80.27	73.5717	38.9044	37.7098	45.1598	44.9816	71.262	68.0653
BTN3A2	106.151	89.6619	61.4208	227.455	234.552	173.291	164.321	122.161	146.15	179.132	190.451	269.538	285.45
BTN3A3	119.375	115.68	119.485	56.4451	70.5897	137.096	131.125	19.9271	21.2808	70.9121	84.4599	231.72	194.407
BTNL2	7.42272	10.3376	9.12835	4.86494	4.38196	4.8469	5.63021	5.12972	4.70079	4.87218	4.75195	5.47689	4.56971
BTNL3	14.3308	13.1785	12.844	7.40678	5.90425	7.76542	6.3294	8.04768	7.91285	7.17789	6.52993	6.36552	7.29265
BTNL8	17.5109	10.8016	10.76	4.08308	5.34671	5.37575	6.06586	4.80755	5.57903	5.75228	6.11719	5.76558	6.50132
BTNL9	15.9944	16.1901	13.5842	6.48297	6.8261	5.81785	6.74946	6.41839	6.2943	6.15248	6.66687	5.81185	6.23814
BTRC	51.4889	50.1181	55.9104	75.2251	63.923	24.1522	24.0278	24.4506	26.0669	35.2451	43.2605	19.2548	15.7656
BUB1	70.258	57.6439	36.5205	329.057	322.46	252.991	243.821	334.766	309.969	179.625	182.794	300.516	280.082
BUB1B	1184.45	851.355	462.145	972.448	769.537	1392.79	1316.28	1720.08	1584.07	1190.56	1225.13	1048.82	1129.23
BUB3	1538.79	1380.77	1346.65	1840.17	1766.89	1360.22	1389.88	1372.57	1285.48	1124.54	1145.65	1121.51	1100.59
BUD13	214.664	193.567	170.657	394.039	403.956	395.175	402.221	241.082	269.72	219.341	242.048	168.217	162.405
BUD31	704.781	612.546	691.383	1187.8	1161.45	709.608	713.589	1023.63	1069.24	770.779	743.296	1340.24	1303.4
BVES	143.108	148.455	171.151	15.293	17.591	31.0972	31.5429	49.8332	44.8019	33.9096	32.7952	86.7132	75.1689
BVES-AS1	10.2771	9.52704	10.0946	5.87205	6.4639	5.27026	5.52449	6.69862	7.35197	5.38213	5.37055	7.8574	8.43713
BX648501	7.8316	6.73522	5.98337	3.81663	3.45437	3.18399	3.09795	3.21371	3.25093	3.34685	3.2513	3.15835	3.30884
BYSL	393.645	431.703	297.127	342.52	332.453	287.211	276.252	206.01	170.275	185.545	176.351	136.972	143.838
BZRAP1	25.2145	8.44531	19.5234	6.83893	7.7108	8.54215	6.96389	8.76802	8.34396	6.86282	6.74732	7.5738	8.25287
BZRAP1-AS1	11.1082	12.1405	11.5523	4.71398	4.36992	4.1273	4.60164	4.73879	5.15577	5.31184	4.93373	5.18418	5.667
BZW1	5072.4	4863.12	4618.73	3709.02	3525.65	2290.77	2272.71	3335.95	3253.31	2854.42	3151.86	3156.27	3161.5
BZW2	2561.38	2707.14	2463.24	1502.79	1526.24	1883.44	1985.79	2985.97	2869.18	1057.07	1021.67	2612.2	2341.7
C10orf10	24.5959	23.1613	38.1169	7.48229	8.63185	10.714	7.92133	12.0826	14.7785	9.4309	11.2823	39.9379	34.3971
C10orf107	11.6145	11.7068	8.20371	4.80539	4.16392	3.87076	3.94847	4.18239	4.67832	5.37206	5.99131	4.68546	4.61521
C10orf11	9.39024	9.69284	9.56094	15.8911	14.3521	5.07909	4.12051	7.38208	8.64942	16.2236	22.838	22.956	28.2117
C10orf113	9.48094	9.28899	8.70607	7.49911	6.33254	7.1508	5.55149	5.64939	6.41657	6.48614	5.68052	6.71627	5.81281
C10orf12	64.0784	63.0386	74.5182	24.3172	26.4171	18.4712	24.2161	12.8325	11.2294	25.5537	33.7625	22.0573	20.1297
C10orf126	12.0018	12.9448	15.3821	5.50059	5.32399	6.08143	5.93137	4.16092	5.35294	6.19811	5.65908	5.51384	5.40677
C10orf128	10.2354	13.2119	16.3764	3.3375	3.78046	3.65514	4.66349	3.41636	3.8145	4.34519	4.27228	5.78007	5.94036
C10orf2	244.854	232.779	182.275	301.572	320.541	58.1243	60.8763	164.559	173.856	58.8055	65.432	38.0881	37.7992
C10orf25	22.54	20.6443	22.2806	10.5738	11.7732	7.46192	8.12652	7.75839	7.78396	8.79383	13.2245	11.7819	11.3388
C10orf32	1455.99	1674.7	1796.27	475.105	498.404	420.528	431.542	405.275	314.229	517.504	544.692	480.242	483.711
C10orf35	175.801	180.64	211.404	23.5116	19.1089	131.817	112.319	14.0777	12.0734	7.5785	5.28873	12.8988	13.3124
C10orf40	10.1227	8.04513	9.41216	4.74615	4.41411	4.4661	5.03641	4.84468	4.05551	4.19047	4.11272	4.19357	4.68535
C10orf53	9.81749	8.74753	9.68961	4.62119	5.06909	5.61987	5.39835	5.2417	4.61764	6.24676	4.62734	5.2616	5.23627
C10orf54	53.1591	40.3394	66.4595	20.5102	20.2996	43.9323	53.9023	10.7325	12.3923	30.9953	30.6811	25.8	32.615
C10orf55	12.6787	14.1158	16.7372	7.11656	6.45666	6.01964	7.42068	5.06307	4.97169	12.6135	15.8507	4.82069	6.46139
C10orf62	15.1004	16.6259	13.5722	4.92718	4.72121	4.99883	4.6227	5.0299	4.57806	5.54555	5.34699	4.89923	4.95631
C10orf67	16.5686	14.8946	16.6111	7.60837	7.31975	6.73684	7.2521	6.82877	7.74657	6.36268	5.58641	5.9464	6.31681
C10orf71	11.8928	15.1238	17.7029	5.75702	5.91989	6.23303	5.37232	6.61086	5.65283	7.20727	6.10656	5.63875	5.8363
C10orf71-AS1	16.6473	20.1332	18.8439	8.11056	7.10056	5.56942	5.43052	6.02128	5.75221	8.33629	6.38126	6.07148	6.93084
C10orf76	210.049	213.863	253.868	81.6684	85.4362	34.9466	34.3037	39.6557	47.5282	42.9393	42.7989	75.6163	77.3288
C10orf82	21.1647	24.4793	15.5867	4.89974	4.52834	5.12043	4.85409	4.6592	5.6039	4.87512	5.17803	6.78921	4.9287
C10orf85	61.425	83.8397	81.365	4.85882	7.89281	7.48313	7.46293	14.4249	11.556	8.58253	6.70983	7.62555	8.08477
C10orf88	216.07	215.312	210.268	95.2201	79.0509	97.9269	100.137	97.2244	77.6076	86.5106	88.0688	88.3134	82.4596
C10orf90	13.7492	11.4336	12.3076	7.78226	7.42686	8.11911	6.74473	29.1411	30.9062	9.60334	8.67912	8.907	11.2733
C10orf91	15.744	12.3665	17.7483	5.86161	6.74981	6.40895	6.18627	5.35859	4.64073	5.96895	4.93208	5.62329	5.5218
C10orf95	15.7199	20.0749	17.8459	6.45912	7.43667	7.58094	6.16956	5.90677	6.52524	4.86576	6.17181	6.47409	6.12801
C10orf99	12.8171	12.0873	10.5429	3.92037	4.7107	4.34899	3.83916	4.2973	4.55347	4.3456	4.48742	3.99886	5.06108
C11orf1	123.866	108.531	141.203	160.922	170.51	41.2571	41.0257	49.7168	59.2967	63.6923	58.3775	60.4177	66.7065
C11orf16	16.4708	16.6323	14.4103	8.90823	6.83302	7.41142	9.19135	8.42559	8.33242	7.96076	6.74542	8.59357	8.59813
C11orf21	8.51225	10.2229	9.85013	4.55663	5.12992	4.76465	5.04905	5.11982	4.77971	4.91931	4.98886	5.25954	5.09043
C11orf24	388.782	381.581	454.968	164.558	160.072	222.442	213.492	698.567	613.507	133.314	134.614	373.831	363.51
C11orf30	152.009	166.389	149.33	85.6667	81.6399	62.994	64.4871	101.459	110.478	69.4353	85.6516	48.9436	49.6004
C11orf31	1592.3	1472.48	1486.98	854.816	809.831	867.115	860.036	880.979	894.125	721.714	775.345	901.124	873.658
C11orf40	6.54261	7.18745	6.20609	3.22719	3.6524	3.55948	3.61546	3.50079	4.39378	3.08694	3.29722	3.6929	3.78679
C11orf42	8.91003	8.32817	10.4298	4.50177	4.89908	4.10994	5.28283	4.38458	4.16575	4.03421	4.26599	4.80221	4.27822
C11orf44	8.51845	7.34161	7.65683	3.75629	3.652	3.3885	3.64375	4.05512	3.72975	3.42116	3.8204	3.57492	3.67785
C11orf45	14.0219	16.5915	19.9891	27.7567	21.4194	8.26971	7.06709	8.87267	12.9518	5.14159	6.93977	7.77523	12.6986
C11orf49	372.038	380.634	406.508	140.881	143.183	233.786	210.457	138.328	157.523	256.635	264.317	116.994	127.36
C11orf53	14.7412	13.0606	11.2031	5.21989	5.24134	5.53116	6.11349	5.66242	5.98465	5.60172	4.38447	6.30173	5.55647
C11orf54	172.348	187.488	201.081	100.463	102.498	131.018	131.029	59.3388	46.279	130.277	164.492	91.7878	79.146
C11orf57	133.012	133.612	133.555	118.756	138.685	118.244	140.587	33.2433	26.8255	120.089	124.937	92.2018	86.8847
C11orf58	2053.35	2007.66	2053.72	1033.65	1169.69	1270.46	1330.8	1045.37	1026.46	1045.18	1209.93	953.627	880.752
C11orf63	16.9478	16.7861	13.4825	17.5053	17.3648	19.064	17.0662	10.2647	11.1176	11.8336	14.316	34.7874	33.953
C11orf65	13.4183	13.6112	11.7274	5.75063	5.2974	3.5153	4.29577	4.24946	3.29524	3.99654	4.61486	4.10759	4.17766
C11orf68	395.936	382.801	399.33	175.779	168.704	215.096	229.666	364.52	285.034	276.465	227.887	196.944	189.737
C11orf70	51.3163	71.517	82.4442	9.63998	8.73853	11.5077	10.3404	5.18573	5.4943	6.37427	6.84605	28.8255	32.7037
C11orf71	28.5284	31.0466	32.7496	194.78	249.578	72.0646	60.6305	15.2032	20.1736	67.1418	76.5148	13.7832	11.7832
C11orf72	9.22694	8.54853	9.44846	4.51117	5.44562	4.93355	6.43371	6.33762	5.40127	5.48545	5.72757	6.30727	5.64425
C11orf73	811.445	913.118	949.386	909.767	943.409	666.425	685.294	425.687	484.123	745.351	734.219	742.071	661.901
C11orf74	349.871	295.408	403.876	146.557	142.762	169.734	169.083	217.955	217.023	243.405	249.302	182.73	176.289
C11orf80	50.364	37.8388	58.5029	19.9495	19.0848	26.7812	18.8919	15.56	17.0956	22.0551	25.1212	11.2642	11.386
C11orf83	460.218	397.81	448.494	270.648	232.509	299.948	345.183	249.432	295.543	261.528	273.467	148.761	134.686
C11orf84	26.9337	32.893	27.5941	46.0477	45.3118	35.4866	41.4324	30.2833	31.2299	26.8395	31.5833	27.6265	24.9078
C11orf85	10.9065	16.173	12.0226	3.96429	5.01211	3.94703	4.74874	5.2379	4.148	3.88088	4.39474	4.49235	5.1493
C11orf86	9.38889	11.1398	12.5961	6.21796	6.44997	6.92673	6.59342	6.72526	7.25125	7.61577	6.25076	6.48782	6.63264
C11orf87	14.1956	13.6893	16.1512	4.60242	5.12011	5.5143	5.18741	3.77093	3.85681	5.47334	5.51971	4.95662	4.42589
C11orf88	7.72325	7.55681	8.96108	4.84789	4.42963	5.01166	6.82464	4.69327	4.66976	7.37664	9.04583	4.33275	4.42987
C11orf92	19.6923	14.1636	13.5197	4.82643	5.77201	6.05403	5.56212	4.53333	5.00547	5.92612	5.67134	6.56313	7.4601
C11orf94	14.6583	16.1053	13.2694	6.15692	6.57354	7.22006	7.20897	7.64652	5.84095	6.13345	7.11727	6.27388	7.19586
C11orf95	553.472	479.934	466.733	67.7294	60.499	52.1663	57.9799	73.23	71.9629	65.5872	66.9936	72.9445	66.8913
C11orf96	212.812	305.183	151.522	10.336	18.0897	15.704	15.7697	9.78542	7.37444	172.326	212.071	280.049	268.47
C11orf97	8.57578	7.6339	7.24389	5.39107	4.58337	4.28096	4.19265	5.435	4.5711	4.62727	3.60985	4.24572	5.57652
C12orf10	589.657	564.514	511.495	300.644	349.076	233.424	217.884	467.225	523.973	178.823	192.469	256.831	241.332
C12orf29	562.98	535.702	513.014	387.415	396.355	222.53	232.488	393.594	382.999	165.442	178.165	266.621	280.99
C12orf4	691.111	844.762	779.968	203.751	183.073	182.336	188.035	245.055	249.4	247.283	229.533	259.864	240.085
C12orf40	10.344	11.2428	11.4127	4.60639	5.12705	4.54404	4.89564	4.58533	4.77068	4.23031	5.01042	4.89151	4.66696
C12orf42	11.674	11.3005	11.2655	5.44763	6.22635	5.91188	4.56761	5.37328	5.22233	5.99451	6.43297	5.41406	5.56951
C12orf43	448.394	362.213	324.937	447.779	378.045	189.974	185.351	265.141	270.319	193.006	178.343	177.738	163.782
C12orf45	131.169	136.823	114.157	714.378	634.554	209.958	195.91	280.324	360.887	187.671	174.979	160.319	186.274
C12orf49	407.84	409.303	391.64	136.659	136.658	123.373	112.548	134.038	126.92	100.729	101.187	104.563	105.657
C12orf5	2514.85	2393.85	2498.48	497.93	516.696	451.278	481.475	1460.37	1594.49	688.839	783.325	316.467	309.156
C12orf50	6.87529	6.20159	6.838	3.33348	3.19712	2.77328	3.39969	3.03573	3.08713	4.19989	3.43744	3.35636	3.42189
C12orf54	13.1979	13.7501	16.0352	5.34564	5.60046	6.03602	5.48024	5.05443	5.1241	5.13204	5.3779	6.53196	5.80436
C12orf55	8.3316	7.43113	10.8678	4.60281	4.26905	4.738	3.85925	5.05985	4.39438	4.62781	5.4454	4.73088	4.63082
C12orf56	8.15502	7.68233	7.74717	5.99274	10.2037	4.10332	3.71998	4.45112	3.57008	3.42315	3.81551	3.74496	3.66226
C12orf57	1790.09	1719.39	1851.3	1517.57	1547.89	1507.78	1437.29	1786.93	2071.27	1279.85	1287.01	1873.9	1918.69
C12orf60	15.0735	20.6105	19.9159	28.3557	13.7083	10.0678	9.29629	32.5587	32.437	6.99694	8.32642	9.60926	10.0767
C12orf61	10.3631	9.90905	11.4841	4.70939	5.0092	7.56209	6.64216	5.87207	6.41203	4.466	4.30435	6.95354	7.12983
C12orf65	43.2973	40.7859	40.3332	127.376	110.138	68.9302	51.1547	55.137	63.2835	36.0863	42.4232	49.2419	52.153
[truncated: 19,631 more rows]
