# Supplementary material for: Abnormal expression of HOXD11 promotes the malignant behavior of glioma cells and leads to poor prognosis of glioma patients
Source: PeerJ. 2021 Feb 8;9:e10820. doi: 10.7717/peerj.10820 (PMC7877241; doi:10.7717/peerj.10820)
Supplement: Supplemental Information 6 [file peerj-09-10820-s006.xlsx]

## Sheet: 9 glioma tissues
Well	Well Position	Omit	Sample Name	Target Name	Task	Reporter	Quencher	Quantity	Quantity Mean	Quantity SD	RQ	RQ Min	RQ Max	CT	Ct Mean	Ct SD	Delta Ct	Delta Ct Mean	Delta Ct SD	Delta Ct SE	Delta Delta Ct	Automatic Ct Threshold	Ct Threshold	Automatic Baseline	Baseline Start	Baseline End	Amp Status	Comments	Cq Conf	CQCONF	Tm1	HIGHSD	OUTLIERRG	MTP	Tm2	Tm3	Tm4
34	C10	FALSE	Sample 1-1	GAPDH	UNKNOWN	SYBR	None				1	0.420049	2.38067	23.641	24.025	0.254458		-2.24463	0.575162	0.39321	0	TRUE	0.417625	TRUE	3	24	Amp		0.988087	N	N	N	N	83.892	N
35	C11	FALSE	Sample 1-2	GAPDH	UNKNOWN	SYBR	None				1	0.420049	2.38067	24.952	24.025	0.254458		-2.24463	0.575162	0.39321	0	TRUE	0.417625	TRUE	3	26	Amp		0.991501	N	N	N	N	83.892	N
36	C12	FALSE	Sample 1-3	GAPDH	UNKNOWN	SYBR	None				1	0.420049	2.38067	23.481	24.025	0.254458		-2.24463	0.575162	0.39321	0	TRUE	0.417625	TRUE	3	25	Amp		0.991774	N	N	N	N	84.1944	N
34	C10	FALSE	Sample 1-1	HOXD11	UNKNOWN	SYBR	None				1	0.420049	2.38067	31.6366	31.6268	0.254458		-2.24463	0.575162	0.39321	0	TRUE	0.417625	TRUE	3	24	Amp		0.988087	N	N	N	N	83.892	N
35	C11	FALSE	Sample 1-2	HOXD11	UNKNOWN	SYBR	None				1	0.420049	2.38067	31.8763	31.6268	0.254458		-2.24463	0.575162	0.39321	0	TRUE	0.417625	TRUE	3	26	Amp		0.991501	N	N	N	N	83.892	N
36	C12	FALSE	Sample 1-3	HOXD11	UNKNOWN	SYBR	None				1	0.420049	2.38067	31.3676	31.6268	0.254458		-2.24463	0.575162	0.39321	0	TRUE	0.417625	TRUE	3	25	Amp		0.991774	N	N	N	N	84.1944	N
88	H4	FALSE	Sample 16-1	GAPDH	UNKNOWN	SYBR	None				1.235	0.563	2.518	23.471	23.658	0.151583		-2.358	0.569	0.415	0.584	TRUE	0.350563	TRUE	3	26	Amp		0.974239	N	N	N	84.048
89	H5	FALSE	Sample 16-2	GAPDH	UNKNOWN	SYBR	None				1.235	0.563	2.518	23.956	23.658	0.151583		-2.358	0.569	0.415	0.584	TRUE	0.350563	TRUE	3	26	Amp		0.98397	N	N	N	83.7455
90	H6	FALSE	Sample 16-3	GAPDH	UNKNOWN	SYBR	None				1.235	0.563	2.518	23.548	23.658	0.151583		-2.358	0.569	0.415	0.584	TRUE	0.350563	TRUE	3	27	Amp		0.88666	N	N	N	84.048
88	H4	FALSE	Sample 16-1	HOXD11	UNKNOWN	SYBR	None				1.235	0.563	2.518	32.2406	32.224	0.151583		-2.358	0.569	0.415	0.584	TRUE	0.350563	TRUE	3	26	Amp		0.974239	N	N	N	84.048
89	H5	FALSE	Sample 16-2	HOXD11	UNKNOWN	SYBR	None				1.235	0.563	2.518	32.0648	32.224	0.151583		-2.358	0.569	0.415	0.584	TRUE	0.350563	TRUE	3	26	Amp		0.98397	N	N	N	83.7455
90	H6	FALSE	Sample 16-3	HOXD11	UNKNOWN	SYBR	None				1.235	0.563	2.518	32.3666	32.224	0.151583		-2.358	0.569	0.415	0.584	TRUE	0.351	TRUE	3	27	Amp		0.88666	N	N	N	84.048
7	A7	FALSE	Sample 17-1	GAPDH	UNKNOWN	SYBR	None				0.892	0.384	2.158	24.581	24.415	0.00646965		-1.982	0.347	0.289	0.385	TRUE	0.384	TRUE	3	22	Amp		0.991375	N	N	N	84.3504
8	A8	FALSE	Sample 17-2	GAPDH	UNKNOWN	SYBR	None				0.892	0.384	2.158	24.681	24.415	0.00646965		-1.982	0.347	0.289	0.385	TRUE	0.384	TRUE	3	23	Amp		0.973209	N	N	N	84.5017
9	A9	FALSE	Sample 17-3	GAPDH	UNKNOWN	SYBR	None				0.892	0.384	2.158	23.984	24.415	0.00646965		-1.982	0.347	0.289	0.385	TRUE	0.384	TRUE	3	21	Amp		0.991428	N	N	N	84.3504
7	A7	FALSE	Sample 17-1	HOXD11	UNKNOWN	SYBR	None				0.892	0.384	2.158	28.3323	28.3334	0.00646965		-1.982	0.347	0.289	0.385	TRUE	0.384	TRUE	3	22	Amp		0.991375	N	N	N	84.3504
8	A8	FALSE	Sample 17-2	HOXD11	UNKNOWN	SYBR	None				0.892	0.384	2.158	28.3275	28.3334	0.00646965		-1.982	0.347	0.289	0.385	TRUE	0.384	TRUE	3	23	Amp		0.973209	N	N	N	84.5017
9	A9	FALSE	Sample 17-3	HOXD11	UNKNOWN	SYBR	None				0.892	0.384	2.158	28.3403	28.3334	0.00646965		-1.982	0.347	0.289	0.385	TRUE	0.384	TRUE	3	21	Amp		0.991428	N	N	N	84.3504
19	B7	FALSE	Sample 18-1	GAPDH	UNKNOWN	SYBR	None				1.108	0.492	2.351	24.102	23.643	0.428374		-2.208	0.451	0.386	0.482	TRUE	0.426	TRUE	3	28	Amp		0.991782	N	Y	N	84.1992	72.1001
20	B8	FALSE	Sample 18-2	GAPDH	UNKNOWN	SYBR	None				1.108	0.492	2.351	23.681	23.643	0.428374		-2.208	0.451	0.386	0.482	TRUE	0.426	TRUE	3	26	Amp		0.992236	N	N	N	84.3504
21	B9	FALSE	Sample 18-3	GAPDH	UNKNOWN	SYBR	None				1.108	0.492	2.351	23.147	23.643	0.428374		-2.208	0.451	0.386	0.482	TRUE	0.426	TRUE	3	27	Amp		0.988443	N	N	N	84.048
19	B7	FALSE	Sample 18-1	HOXD11	UNKNOWN	SYBR	None				1.108	0.492	2.351	33.6987	33.4384	0.428374		-2.208	0.451	0.386	0.482	TRUE	0.426	TRUE	3	28	Amp		0.991782	N	Y	N	84.1992	72.1001
20	B8	FALSE	Sample 18-2	HOXD11	UNKNOWN	SYBR	None				1.108	0.492	2.351	32.944	33.4384	0.428374		-2.208	0.451	0.386	0.482	TRUE	0.426	TRUE	3	26	Amp		0.992236	N	N	N	84.3504
21	B9	FALSE	Sample 18-3	HOXD11	UNKNOWN	SYBR	None				1.108	0.492	2.351	33.6726	33.4384	0.428374		-2.208	0.451	0.386	0.482	TRUE	0.426	TRUE	3	27	Amp		0.988443	N	N	N	84.048
31	C7	FALSE	Sample 19-1	GAPDH	UNKNOWN	SYBR	None				0.813	0.398	2.249	23.152	23.116	0.0885658		-2.537	0.548	0.429	0.502	TRUE	0.423	TRUE	3	25	Amp		0.992996	N	N	N	84.048
32	C8	FALSE	Sample 19-2	GAPDH	UNKNOWN	SYBR	None				0.813	0.398	2.249	23.158	23.116	0.0885658		-2.537	0.548	0.429	0.502	TRUE	0.423	TRUE	3	26	Amp		0.989362	N	N	N	84.1992
33	C9	FALSE	Sample 19-3	GAPDH	UNKNOWN	SYBR	None				0.813	0.398	2.249	23.039	23.116	0.0885658		-2.537	0.548	0.429	0.502	TRUE	0.423	TRUE	3	25	Amp		0.991181	N	N	N	84.048
31	C7	FALSE	Sample 19-1	HOXD11	UNKNOWN	SYBR	None				0.813	0.398	2.249	30.9455	30.9326	0.0885658		-2.537	0.548	0.429	0.502	TRUE	0.423	TRUE	3	25	Amp		0.992996	N	N	N	84.048
32	C8	FALSE	Sample 19-2	HOXD11	UNKNOWN	SYBR	None				0.813	0.398	2.249	31.014	30.9326	0.0885658		-2.537	0.548	0.429	0.502	TRUE	0.423	TRUE	3	26	Amp		0.989362	N	N	N	84.1992
33	C9	FALSE	Sample 19-3	HOXD11	UNKNOWN	SYBR	None				0.813	0.398	2.249	30.8383	30.9326	0.0885658		-2.537	0.548	0.429	0.502	TRUE	0.423	TRUE	3	25	Amp		0.991181	N	N	N	84.048
46	D10	FALSE	Sample 2-1	GAPDH	UNKNOWN	SYBR	None				0.70283	0.35174	1.40436	23.418	23.259	0.319353		-1.73588	0.623006	0.359693	0.508752	TRUE	0.417625	TRUE	3	24	Amp		0.990239	N	N	N	N	83.5896	N
47	D11	FALSE	Sample 2-2	GAPDH	UNKNOWN	SYBR	None				0.70283	0.35174	1.40436	23.258	23.259	0.319353		-1.73588	0.623006	0.359693	0.508752	TRUE	0.417625	TRUE	3	24	Amp		0.991289	N	N	N	N	83.892	N
48	D12	FALSE	Sample 2-3	GAPDH	UNKNOWN	SYBR	None				0.70283	0.35174	1.40436	23.102	23.259	0.319353		-1.73588	0.623006	0.359693	0.508752	TRUE	0.417625	TRUE	3	25	Amp		0.986414	N	N	N	N	84.0432	N
46	D10	FALSE	Sample 2-1	HOXD11	UNKNOWN	SYBR	None				0.70283	0.35174	1.40436	31.5837	31.4606	0.319353		-1.73588	0.623006	0.359693	0.508752	TRUE	0.417625	TRUE	3	24	Amp		0.990239	N	N	N	N	83.5896	N
47	D11	FALSE	Sample 2-2	HOXD11	UNKNOWN	SYBR	None				0.70283	0.35174	1.40436	31.7001	31.4606	0.319353		-1.73588	0.623006	0.359693	0.508752	TRUE	0.417625	TRUE	3	24	Amp		0.991289	N	N	N	N	83.892	N
48	D12	FALSE	Sample 2-3	HOXD11	UNKNOWN	SYBR	None				0.70283	0.35174	1.40436	31.098	31.4606	0.319353		-1.73588	0.623006	0.359693	0.508752	TRUE	0.417625	TRUE	3	25	Amp		0.986414	N	N	N	N	84.0432	N
43	D7	FALSE	Sample 20-1	GAPDH	UNKNOWN	SYBR	None				1.086	0.461	2.368	23.695	23.337	0.149552		-2.964	0.682	0.518	-0.648	TRUE	0.350563	TRUE	3	22	Amp		0.992767	N	N	N	83.8967
44	D8	FALSE	Sample 20-2	GAPDH	UNKNOWN	SYBR	None				1.086	0.461	2.368	23.157	23.337	0.149552		-2.964	0.682	0.518	-0.648	TRUE	0.350563	TRUE	3	23	Amp		0.991394	N	N	N	83.7455
45	D9	FALSE	Sample 20-3	GAPDH	UNKNOWN	SYBR	None				1.086	0.461	2.368	23.158	23.337	0.149552		-2.964	0.682	0.518	-0.648	TRUE	0.350563	TRUE	3	22	Amp		0.990114	N	N	N	83.5942
43	D7	FALSE	Sample 20-1	HOXD11	UNKNOWN	SYBR	None				1.086	0.461	2.368	28.8881	29.0165	0.149552		-2.964	0.682	0.518	-0.648	TRUE	0.350563	TRUE	3	22	Amp		0.992767	N	N	N	83.8967
44	D8	FALSE	Sample 20-2	HOXD11	UNKNOWN	SYBR	None				1.086	0.461	2.368	29.1807	29.0165	0.149552		-2.964	0.682	0.518	-0.648	TRUE	0.350563	TRUE	3	23	Amp		0.991394	N	N	N	83.7455
45	D9	FALSE	Sample 20-3	HOXD11	UNKNOWN	SYBR	None				1.086	0.461	2.368	28.9809	29.0165	0.149552		-2.964	0.682	0.518	-0.648	TRUE	0.350563	TRUE	3	22	Amp		0.990114	N	N	N	83.5942
58	E10	FALSE	Sample 3-1	GAPDH	UNKNOWN	SYBR	None				1.60045	0.586568	4.36682	23.032	23.341	0.0854566		-2.92311	0.645398	0.45503	-0.678478	TRUE	0.417625	TRUE	3	24	Amp		0.987992	N	N	N	N	84.0432	N
59	E11	FALSE	Sample 3-2	GAPDH	UNKNOWN	SYBR	None				1.60045	0.586568	4.36682	23.146	23.341	0.0854566		-2.92311	0.645398	0.45503	-0.678478	TRUE	0.417625	TRUE	3	22	Amp		0.987519	N	N	N	N	84.0432	N
60	E12	FALSE	Sample 3-3	GAPDH	UNKNOWN	SYBR	None				1.60045	0.586568	4.36682	23.845	23.341	0.0854566		-2.92311	0.645398	0.45503	-0.678478	TRUE	0.417625	TRUE	3	25	Amp		0.984912	N	N	N	N	83.892	N
58	E10	FALSE	Sample 3-1	HOXD11	UNKNOWN	SYBR	None				1.60045	0.586568	4.36682	31.2683	31.3612	0.0854566		-2.92311	0.645398	0.45503	-0.678478	TRUE	0.417625	TRUE	3	24	Amp		0.987992	N	N	N	N	84.0432	N
59	E11	FALSE	Sample 3-2	HOXD11	UNKNOWN	SYBR	None				1.60045	0.586568	4.36682	31.379	31.3612	0.0854566		-2.92311	0.645398	0.45503	-0.678478	TRUE	0.417625	TRUE	3	22	Amp		0.987519	N	N	N	N	84.0432	N
60	E12	FALSE	Sample 3-3	HOXD11	UNKNOWN	SYBR	None				1.60045	0.586568	4.36682	31.4364	31.3612	0.0854566		-2.92311	0.645398	0.45503	-0.678478	TRUE	0.417625	TRUE	3	25	Amp		0.984912	N	N	N	N	83.892	N
70	F10	FALSE	Sample 4-1	GAPDH	UNKNOWN	SYBR	None				1.824	0.628	5.018	23.174	23.202	0.319969		-2.057	0.529	0.398	-0.596	TRUE	0.417625	TRUE	3	23	Amp		0.990784	N	N	N	N	84.1944	N
71	F11	FALSE	Sample 4-2	GAPDH	UNKNOWN	SYBR	None				1.824	0.628	5.018	23.168	23.202	0.319969		-2.057	0.529	0.398	-0.596	TRUE	0.417625	TRUE	3	25	Amp		0.986731	N	N	N	N	83.892	N
72	F12	FALSE	Sample 4-3	GAPDH	UNKNOWN	SYBR	None				1.824	0.628	5.018	23.264	23.202	0.319969		-2.057	0.529	0.398	-0.596	TRUE	0.417625	TRUE	3	22	Amp		0.990032	N	N	N	N	84.0432	N
70	F10	FALSE	Sample 4-1	HOXD11	UNKNOWN	SYBR	None				1.824	0.628	5.018	30.898	30.9737	0.319969		-2.057	0.529	0.398	-0.596	TRUE	0.417625	TRUE	3	23	Amp		0.990784	N	N	N	N	84.1944	N
71	F11	FALSE	Sample 4-2	HOXD11	UNKNOWN	SYBR	None				1.824	0.628	5.018	31.3248	30.9737	0.319969		-2.057	0.529	0.398	-0.596	TRUE	0.417625	TRUE	3	25	Amp		0.986731	N	N	N	N	83.892	N
72	F12	FALSE	Sample 4-3	HOXD11	UNKNOWN	SYBR	None				1.824	0.628	5.018	30.6985	30.9737	0.319969		-2.057	0.529	0.398	-0.596	TRUE	0.417625	TRUE	3	22	Amp		0.990032	N	N	N	N	84.0432	N
82	G10	FALSE	Sample 5-1	GAPDH	UNKNOWN	SYBR	None				1.305	0.528	4.843	23.984	23.371	0.38038		-1.956	0.675	0.429	0.581	TRUE	0.417625	TRUE	3	24	Amp		0.989195	N	N	N	N	84.4969	N
83	G11	FALSE	Sample 5-2	GAPDH	UNKNOWN	SYBR	None				1.305	0.528	4.843	23.013	23.371	0.38038		-1.956	0.675	0.429	0.581	TRUE	0.417625	TRUE	3	22	Amp		0.988273	N	N	N	N	84.4969	N
84	G12	FALSE	Sample 5-3	GAPDH	UNKNOWN	SYBR	None				1.305	0.528	4.843	23.146	23.371	0.38038		-1.956	0.675	0.429	0.581	TRUE	0.417625	TRUE	3	23	Amp		0.989195	N	N	N	N	84.7993	N
82	G10	FALSE	Sample 5-1	HOXD11	UNKNOWN	SYBR	None				1.305	0.528	4.843	30.0665	30.0149	0.38038		-1.956	0.675	0.429	0.581	TRUE	0.417625	TRUE	3	24	Amp		0.989195	N	N	N	N	84.4969	N
83	G11	FALSE	Sample 5-2	HOXD11	UNKNOWN	SYBR	None				1.305	0.528	4.843	30.3668	30.0149	0.38038		-1.956	0.675	0.429	0.581	TRUE	0.417625	TRUE	3	22	Amp		0.988273	N	N	N	N	84.4969	N
84	G12	FALSE	Sample 5-3	HOXD11	UNKNOWN	SYBR	None				1.305	0.528	4.843	29.6113	30.0149	0.38038		-1.956	0.675	0.429	0.581	TRUE	0.417625	TRUE	3	23	Amp		0.989195	N	N	N	N	84.7993	N

## Sheet: 5 normal tissues
Well	Well Position	Omit	Sample Name	Target Name	Task	Reporter	Quencher	Quantity	Quantity Mean	Quantity SD	RQ	RQ Min	RQ Max	CT	Ct Mean	Ct SD	Delta Ct	Delta Ct Mean	Delta Ct SD	Delta Ct SE	Delta Delta Ct	Automatic Ct Threshold	Ct Threshold	Automatic Baseline	Baseline Start	Baseline End	Amp Status	Comments	Cq Conf	CQCONF	Tm1	HIGHSD	OUTLIERRG	MTP	Tm2	Tm3	Tm4
88	H4	FALSE	Normal 1-1	GAPDH	UNKNOWN	SYBR	None				1	0.708499	1.41143	20.075	20.57	0.276569		1.36813	0.310148	0.179064	0	TRUE	0.27389	TRUE	3	24	Amp		0.990488	N	84.2391	N	N	N
89	H5	FALSE	Normal 1-2	GAPDH	UNKNOWN	SYBR	None				1	0.708499	1.41143	20.921	20.57	0.276569		1.36813	0.310148	0.179064	0	TRUE	0.27389	TRUE	3	23	Amp		0.99308	N	84.0866	N	N	N
90	H6	FALSE	Normal 1-3	GAPDH	UNKNOWN	SYBR	None				1	0.708499	1.41143	20.714	20.57	0.276569		1.36813	0.310148	0.179064	0	TRUE	0.27389	TRUE	3	25	Amp		0.993705	N	84.0866	N	N	N
7	A7	FALSE	Normal 2-1	GAPDH	UNKNOWN	SYBR	None				0.848384	0.622918	1.15546	20.157	20.326	0.198593		1.60534	0.27803	0.160521	0.23721	TRUE	0.27389	TRUE	3	25	Amp		0.993741	N	84.6964	N	N	N
8	A8	FALSE	Normal 2-2	GAPDH	UNKNOWN	SYBR	None				0.848384	0.622918	1.15546	20.648	20.326	0.198593		1.60534	0.27803	0.160521	0.23721	TRUE	0.27389	TRUE	3	24	Amp		0.981722	N	84.6964	N	N	N
9	A9	FALSE	Normal 2-3	GAPDH	UNKNOWN	SYBR	None				0.848384	0.622918	1.15546	20.172	20.326	0.198593		1.60534	0.27803	0.160521	0.23721	TRUE	0.27389	TRUE	3	24	Amp		0.9954	N	84.5439	N	N	N
19	B7	FALSE	Normal 3-1	GAPDH	UNKNOWN	SYBR	None				0.801717	0.581694	1.10496	20.369	20.291	0.143869		1.68697	0.288733	0.1667	0.318834	TRUE	0.27389	TRUE	3	25	Amp		0.993378	N	84.5439	N	N	N
20	B8	FALSE	Normal 3-2	GAPDH	UNKNOWN	SYBR	None				0.801717	0.581694	1.10496	20.149	20.291	0.143869		1.68697	0.288733	0.1667	0.318834	TRUE	0.27389	TRUE	3	23	Amp		0.991775	N	84.5439	N	N	N
21	B9	FALSE	Normal 3-3	GAPDH	UNKNOWN	SYBR	None				0.801717	0.581694	1.10496	20.354	20.291	0.143869		1.68697	0.288733	0.1667	0.318834	TRUE	0.27389	TRUE	3	23	Amp		0.991958	N	84.3915	N	N	N
31	C7	FALSE	Normal 4-1	GAPDH	UNKNOWN	SYBR	None				0.179865	0.0938303	0.344788	20.394	20.565	0.564886		3.84314	0.585654	0.338127	2.47501	TRUE	0.27389	TRUE	3	25	Amp		0.993199	N	83.4769	Y	N	N
32	C8	FALSE	Normal 4-2	GAPDH	UNKNOWN	SYBR	None				0.179865	0.0938303	0.344788	20.954	20.565	0.564886		3.84314	0.585654	0.338127	2.47501	TRUE	0.27389	TRUE	3	25	Amp		0.993383	N	83.7818	Y	N	N
33	C9	FALSE	Normal 4-3	GAPDH	UNKNOWN	SYBR	None				0.179865	0.0938303	0.344788	20.348	20.565	0.564886		3.84314	0.585654	0.338127	2.47501	TRUE	0.27389	TRUE	3	27	Amp		0.993001	N	83.3244	Y	N	N
43	D7	FALSE	Normal 5-1	GAPDH	UNKNOWN	SYBR	None				0.261714	0.156845	0.436702	20.581	20.233	0.295718		3.30207	0.460802	0.266044	1.93394	TRUE	0.27389	TRUE	3	25	Amp		0.994201	N	83.6293	N	N	N
44	D8	FALSE	Normal 5-2	GAPDH	UNKNOWN	SYBR	None				0.261714	0.156845	0.436702	20.048	20.233	0.295718		3.30207	0.460802	0.266044	1.93394	TRUE	0.27389	TRUE	3	24	Amp		0.989174	N	83.9342	N	N	N
45	D9	FALSE	Normal 5-3	GAPDH	UNKNOWN	SYBR	None				0.261714	0.156845	0.436702	20.069	20.233	0.295718		3.30207	0.460802	0.266044	1.93394	TRUE	0.27389	TRUE	3	25	Amp		0.988896	N	83.7818	N	N	N
88	H4	FALSE	Normal 1-1	HOXD11	UNKNOWN	SYBR	None				1	0.708499	1.41143	29.853	29.9194	0.276569		1.36813	0.310148	0.179064	0	TRUE	0.27389	TRUE	3	24	Amp		0.990488	N	84.2391	N	N	N
89	H5	FALSE	Normal 1-2	HOXD11	UNKNOWN	SYBR	None				1	0.708499	1.41143	29.6821	29.9194	0.276569		1.36813	0.310148	0.179064	0	TRUE	0.27389	TRUE	3	23	Amp		0.99308	N	84.0866	N	N	N
90	H6	FALSE	Normal 1-3	HOXD11	UNKNOWN	SYBR	None				1	0.708499	1.41143	30.2232	29.9194	0.276569		1.36813	0.310148	0.179064	0	TRUE	0.27389	TRUE	3	25	Amp		0.993705	N	84.0866	N	N	N
7	A7	FALSE	Normal 2-1	HOXD11	UNKNOWN	SYBR	None				0.848384	0.622918	1.15546	30.3845	30.1832	0.198593		1.60534	0.27803	0.160521	0.23721	TRUE	0.27389	TRUE	3	25	Amp		0.993741	N	84.6964	N	N	N
8	A8	FALSE	Normal 2-2	HOXD11	UNKNOWN	SYBR	None				0.848384	0.622918	1.15546	30.1777	30.1832	0.198593		1.60534	0.27803	0.160521	0.23721	TRUE	0.27389	TRUE	3	24	Amp		0.981722	N	84.6964	N	N	N
9	A9	FALSE	Normal 2-3	HOXD11	UNKNOWN	SYBR	None				0.848384	0.622918	1.15546	29.9874	30.1832	0.198593		1.60534	0.27803	0.160521	0.23721	TRUE	0.27389	TRUE	3	24	Amp		0.9954	N	84.5439	N	N	N
19	B7	FALSE	Normal 3-1	HOXD11	UNKNOWN	SYBR	None				0.801717	0.581694	1.10496	29.9393	29.9175	0.143869		1.68697	0.288733	0.1667	0.318834	TRUE	0.27389	TRUE	3	25	Amp		0.993378	N	84.5439	N	N	N
20	B8	FALSE	Normal 3-2	HOXD11	UNKNOWN	SYBR	None				0.801717	0.581694	1.10496	29.764	29.9175	0.143869		1.68697	0.288733	0.1667	0.318834	TRUE	0.27389	TRUE	3	23	Amp		0.991775	N	84.5439	N	N	N
21	B9	FALSE	Normal 3-3	HOXD11	UNKNOWN	SYBR	None				0.801717	0.581694	1.10496	30.0492	29.9175	0.143869		1.68697	0.288733	0.1667	0.318834	TRUE	0.27389	TRUE	3	23	Amp		0.991958	N	84.3915	N	N	N
31	C7	FALSE	Normal 4-1	HOXD11	UNKNOWN	SYBR	None				0.179865	0.0938303	0.344788	31.7643	32.1788	0.564886		3.84314	0.585654	0.338127	2.47501	TRUE	0.27389	TRUE	3	25	Amp		0.993199	N	83.4769	Y	N	N
32	C8	FALSE	Normal 4-2	HOXD11	UNKNOWN	SYBR	None				0.179865	0.0938303	0.344788	31.9499	32.1788	0.564886		3.84314	0.585654	0.338127	2.47501	TRUE	0.27389	TRUE	3	25	Amp		0.993383	N	83.7818	Y	N	N
33	C9	FALSE	Normal 4-3	HOXD11	UNKNOWN	SYBR	None				0.179865	0.0938303	0.344788	32.8222	32.1788	0.564886		3.84314	0.585654	0.338127	2.47501	TRUE	0.27389	TRUE	3	27	Amp		0.993001	N	83.3244	Y	N	N
43	D7	FALSE	Normal 5-1	HOXD11	UNKNOWN	SYBR	None				0.261714	0.156845	0.436702	31.6717	31.8964	0.295718		3.30207	0.460802	0.266044	1.93394	TRUE	0.27389	TRUE	3	25	Amp		0.994201	N	83.6293	N	N	N
44	D8	FALSE	Normal 5-2	HOXD11	UNKNOWN	SYBR	None				0.261714	0.156845	0.436702	32.2314	31.8964	0.295718		3.30207	0.460802	0.266044	1.93394	TRUE	0.27389	TRUE	3	24	Amp		0.989174	N	83.9342	N	N	N
45	D9	FALSE	Normal 5-3	HOXD11	UNKNOWN	SYBR	None				0.261714	0.156845	0.436702	31.7862	31.8964	0.295718		3.30207	0.460802	0.266044	1.93394	TRUE	0.27389	TRUE	3	25	Amp		0.988896	N	83.7818	N	N	N

## Sheet: Sheet3
Sample Name	GAPDH	HOXD11	ΔCt	Mean of NormalΔCt	ΔΔCt	2-ΔΔCt
Normal 1-1	20.075	29.853	9.77799	10.422	-0.644009	2.64401
Normal 1-2	20.921	29.6821	8.76114	10.422	-1.66086	3.66086	9.21769	3.07256
Normal 1-3	20.714	30.2232	9.50918	10.422	-0.912823	2.91282
Normal 2-1	20.157	30.3845	10.2275	10.422	-0.194536	2.19454
Normal 2-2	20.648	30.1777	9.5297	10.422	-0.892296	2.8923	7.69344	2.56448
Normal 2-3	20.172	29.9874	9.81539	10.422	-0.606608	2.60661
Normal 3-1	20.369	29.9393	9.57033	10.422	-0.851671	2.85167
Normal 3-2	20.149	29.764	9.61498	10.422	-0.807015	2.80702	8.38546	2.79515
Normal 3-3	20.354	30.0492	9.69523	10.422	-0.726769	2.72677
Normal 4-1	20.394	31.7643	11.3703	10.422	0.948294	1.05171
Normal 4-2	20.954	31.9499	10.9959	10.422	0.573949	1.42605	2.42553	0.808509
Normal 4-3	20.348	32.8222	12.4742	10.422	2.05223	-0.0522313
Normal 5-1	20.581	31.6717	11.0907	10.422	0.668703	1.3313
Normal 5-2	20.048	32.2314	12.1834	10.422	1.76145	0.238551	2.27468	0.758228
Normal 5-3	20.069	31.7862	11.7172	10.422	1.29516	0.704837
Sample 1-1	23.641	31.6366	7.99556	10.422	-2.42644	4.42644
Sample 1-2	24.952	31.8763	6.92426	10.422	-3.49774	5.49774	14.4596	4.81985
Sample 1-3	23.481	31.3676	7.88662	10.422	-2.53538	4.53538
Sample 16-1	23.471	32.2406	8.76965	10.422	-1.65235	3.65235
Sample 16-2	23.956	32.0648	8.10882	10.422	-2.31318	4.31318	11.5689	3.85631
Sample 16-3	23.548	32.3666	8.81862	10.422	-1.60338	3.60338
Sample 17-1	24.581	28.3323	3.75133	10.422	-6.67067	8.67067
Sample 17-2	24.681	28.3275	3.64648	10.422	-6.77552	8.77552	25.5119	8.50397
Sample 17-3	23.984	28.3403	4.35629	10.422	-6.06571	8.06571
Sample 18-1	24.102	33.6987	9.59673	10.422	-0.825266	2.82527
Sample 18-2	23.681	32.944	9.26303	10.422	-1.15897	3.15897	7.88066	2.62689
Sample 18-3	23.147	33.6726	10.5256	10.422	0.103573	1.89643
Sample 19-1	23.152	30.9455	7.79352	10.422	-2.62848	4.62848
Sample 19-2	23.158	31.014	7.85599	10.422	-2.56601	4.56601	13.8172	4.60574
Sample 19-3	23.039	30.8383	7.79928	10.422	-2.62272	4.62272
Sample 2-1	23.418	31.5837	8.16565	10.422	-2.25635	4.25635
Sample 2-2	23.258	31.7001	8.44212	10.422	-1.97988	3.97988	12.6622	4.22073
Sample 2-3	23.102	31.098	7.99603	10.422	-2.42597	4.42597
Sample 3-1	23.032	31.2683	8.23628	10.422	-2.18572	4.18572
Sample 3-2	23.146	31.379	8.23298	10.422	-2.18902	4.18902	13.2053	4.40178
Sample 3-3	23.845	31.4364	7.59141	10.422	-2.83059	4.83059
Sample 4-1	23.174	30.898	7.72397	10.422	-2.69803	4.69803
Sample 4-2	23.168	31.3248	8.1568	10.422	-2.2652	4.2652	13.9508	4.65025
Sample 4-3	23.264	30.6985	7.43447	10.422	-2.98753	4.98753
Sample 5-1	23.984	30.0665	6.08252	10.422	-4.33948	6.33948
Sample 5-2	23.013	30.3668	7.35383	10.422	-3.06817	5.06817	17.3643	5.78811
Sample 5-3	23.146	29.6113	6.46534	10.422	-3.95666	5.95666		0
Sample 20-1	23.695	28.8881	5.19306	10.422	-5.22894	7.22894
Sample 20-2	23.157	29.1807	6.0237	10.422	-4.3983	6.3983
Sample 20-3	23.158	28.9809	5.82285	10.422	-4.59915	6.59915
