# Supplementary material for: Abnormal expression of HOXD11 promotes the malignant behavior of glioma cells and leads to poor prognosis of glioma patients
Source: PeerJ. 2021 Feb 8;9:e10820. doi: 10.7717/peerj.10820 (PMC7877241; doi:10.7717/peerj.10820)
Supplement: Supplemental Information 7 [file peerj-09-10820-s007.xlsx]

## Sheet: Results
Block Type	96-Well 0.2-mL Block
Calibration Background is expired	No
Calibration Background performed on	2020.07.20
Calibration Pure Dye ABY is expired	No
Calibration Pure Dye ABY performed on	2020.07.20
Calibration Pure Dye FAM is expired	No
Calibration Pure Dye FAM performed on	2020.07.20
Calibration Pure Dye JUN is expired	No
Calibration Pure Dye JUN performed on	2020.07.20
Calibration Pure Dye NED is expired	No
Calibration Pure Dye NED performed on	2020.07.20
Calibration Pure Dye ROX is expired	No
Calibration Pure Dye ROX performed on	2020.07.20
Calibration Pure Dye SYBR is expired	No
Calibration Pure Dye SYBR performed on	2020.07.20
Calibration Pure Dye TAMRA is expired	No
Calibration Pure Dye TAMRA performed on	2020.07.20
Calibration Pure Dye VIC is expired	No
Calibration Pure Dye VIC performed on	2020.07.20
Calibration ROI is expired	No
Calibration ROI performed on	2020.07.20
Calibration Uniformity is expired	No
Calibration Uniformity performed on	2020.07.20
Chemistry	SYBR_GREEN
Date Created	2020.07.20 13:20:42 PM CST
Experiment Barcode
Experiment Comment
Experiment File Name	D:\Users\INSTR-ADMIN\Desktop\2020.07.20.eds
Experiment Name	2020.07.20
Experiment Run End Time	2020.07.20 12:36:22 PM CST
Experiment Type	Comparative Cт (ΔΔCт)
Instrument Name	272322040
Instrument Serial Number	272322040
Instrument Type	QuantStudio™ 3 System
Passive Reference	ROX
Post-read Stage/Step
Pre-read Stage/Step
Quantification Cycle Method	Ct
Signal Smoothing On	true
Stage where Melt Analysis is performed	Stage3
Stage/ Cycle where Ct Analysis is performed	Stage2, Step2
User Name	WJL
Well	Well Position	Omit	Sample Name	Target Name	Task	Reporter	Quencher	Quantity	Quantity Mean	Quantity SD	RQ	RQ Min	RQ Max	CT	Ct Mean	Ct SD	Delta Ct	Delta Ct Mean	Delta Ct SD	Delta Ct SE	Delta Delta Ct	Automatic Ct Threshold	Ct Threshold	Automatic Baseline	Baseline Start	Baseline End	Amp Status	Comments	Cq Conf	CQCONF	Tm1	HIGHSD	OUTLIERRG	MTP	Tm2	Tm3	Tm4
1	A1	FALSE	HA-1	GAPDH	UNKNOWN	SYBR	None				0.848384	0.622918	1.15546	20.283	20.143	0.198593		1.60534	0.27803	0.160521	0.23721	TRUE	0.27389	TRUE	3	25	Amp		0.993741	N	84.6964	N	N	N
2	A2	FALSE	HA-2	GAPDH	UNKNOWN	SYBR	None				0.848384	0.622918	1.15546	19.987	20.143	0.198593		1.60534	0.27803	0.160521	0.23721	TRUE	0.27389	TRUE	3	24	Amp		0.981722	N	84.6964	N	N	N
3	A3	FALSE	HA-3	GAPDH	UNKNOWN	SYBR	None				0.848384	0.622918	1.15546	20.158	20.143	0.198593		1.60534	0.27803	0.160521	0.23721	TRUE	0.27389	TRUE	3	24	Amp		0.9954	N	84.5439	N	N	N
4	A4	FALSE	HA-1	HOXD11	UNKNOWN	SYBR	None				0.848384	0.622918	1.15546	29.856	29.546	0.198593		1.60534	0.27803	0.160521	0.23721	TRUE	0.27389	TRUE	3	25	Amp		0.993741	N	84.6964	N	N	N
5	A5	FALSE	HA-2	HOXD11	UNKNOWN	SYBR	None				0.848384	0.622918	1.15546	29.128	29.546	0.198593		1.60534	0.27803	0.160521	0.23721	TRUE	0.27389	TRUE	3	24	Amp		0.981722	N	84.6964	N	N	N
6	A6	FALSE	HA-3	HOXD11	UNKNOWN	SYBR	None				0.848384	0.622918	1.15546	29.653	29.546	0.198593		1.60534	0.27803	0.160521	0.23721	TRUE	0.27389	TRUE	3	24	Amp		0.9954	N	84.5439	N	N	N
7	A7	FALSE	T98-1	GAPDH	UNKNOWN	SYBR	None				0.801717	0.581694	1.10496	18.975	18.641	0.143869		1.68697	0.288733	0.1667	0.318834	TRUE	0.27389	TRUE	3	25	Amp		0.993378	N	84.5439	N	N	N
8	A8	FALSE	T98-2	GAPDH	UNKNOWN	SYBR	None				0.801717	0.581694	1.10496	18.254	18.641	0.143869		1.68697	0.288733	0.1667	0.318834	TRUE	0.27389	TRUE	3	23	Amp		0.991775	N	84.5439	N	N	N
9	A9	FALSE	T98-3	GAPDH	UNKNOWN	SYBR	None				0.801717	0.581694	1.10496	18.694	18.641	0.143869		1.68697	0.288733	0.1667	0.318834	TRUE	0.27389	TRUE	3	23	Amp		0.991958	N	84.3915	N	N	N
10	A10	FALSE	T98-1	HOXD11	UNKNOWN	SYBR	None				0.801717	0.581694	1.10496	25.614	25.465	0.143869		1.68697	0.288733	0.1667	0.318834	TRUE	0.27389	TRUE	3	25	Amp		0.993378	N	84.5439	N	N	N
11	A11	FALSE	T98-2	HOXD11	UNKNOWN	SYBR	None				0.801717	0.581694	1.10496	25.652	25.465	0.143869		1.68697	0.288733	0.1667	0.318834	TRUE	0.27389	TRUE	3	23	Amp		0.991775	N	84.5439	N	N	N
12	A12	FALSE	T98-3	HOXD11	UNKNOWN	SYBR	None				0.801717	0.581694	1.10496	25.128	25.465	0.143869		1.68697	0.288733	0.1667	0.318834	TRUE	0.27389	TRUE	3	23	Amp		0.991958	N	84.3915	N	N	N
13	B1	FALSE	LN229-1	GAPDH	UNKNOWN	SYBR	None				0.179865	0.0938303	0.344788	19.562	19.496	0.564886		3.84314	0.585654	0.338127	2.47501	TRUE	0.27389	TRUE	3	25	Amp		0.993199	N	83.4769	Y	N	N
14	B2	FALSE	LN229-2	GAPDH	UNKNOWN	SYBR	None				0.179865	0.0938303	0.344788	19.254	19.496	0.564886		3.84314	0.585654	0.338127	2.47501	TRUE	0.27389	TRUE	3	25	Amp		0.993383	N	83.7818	Y	N	N
15	B3	FALSE	LN229-3	GAPDH	UNKNOWN	SYBR	None				0.179865	0.0938303	0.344788	19.673	19.496	0.564886		3.84314	0.585654	0.338127	2.47501	TRUE	0.27389	TRUE	3	27	Amp		0.993001	N	83.3244	Y	N	N
16	B4	FALSE	LN229-1	HOXD11	UNKNOWN	SYBR	None				0.179865	0.0938303	0.344788	26.548	26.589	0.564886		3.84314	0.585654	0.338127	2.47501	TRUE	0.27389	TRUE	3	25	Amp		0.993199	N	83.4769	Y	N	N
17	B5	FALSE	LN229-2	HOXD11	UNKNOWN	SYBR	None				0.179865	0.0938303	0.344788	26.362	26.589	0.564886		3.84314	0.585654	0.338127	2.47501	TRUE	0.27389	TRUE	3	25	Amp		0.993383	N	83.7818	Y	N	N
18	B6	FALSE	LN229-3	HOXD11	UNKNOWN	SYBR	None				0.179865	0.0938303	0.344788	26.857	26.589	0.564886		3.84314	0.585654	0.338127	2.47501	TRUE	0.27389	TRUE	3	27	Amp		0.993001	N	83.3244	Y	N	N
19	B7	FALSE	U251-1	GAPDH	UNKNOWN	SYBR	None				0.261714	0.156845	0.436702	21.824	21.722	0.295718		3.30207	0.460802	0.266044	1.93394	TRUE	0.27389	TRUE	3	25	Amp		0.994201	N	83.6293	N	N	N
20	B8	FALSE	U251-2	GAPDH	UNKNOWN	SYBR	None				0.261714	0.156845	0.436702	21.627	21.722	0.295718		3.30207	0.460802	0.266044	1.93394	TRUE	0.27389	TRUE	3	24	Amp		0.989174	N	83.9342	N	N	N
21	B9	FALSE	U251-3	GAPDH	UNKNOWN	SYBR	None				0.261714	0.156845	0.436702	21.716	21.722	0.295718		3.30207	0.460802	0.266044	1.93394	TRUE	0.27389	TRUE	3	25	Amp		0.988896	N	83.7818	N	N	N
22	B10	FALSE	U251-1	HOXD11	UNKNOWN	SYBR	None				0.261714	0.156845	0.436702	24.153	24.389	0.295718		3.30207	0.460802	0.266044	1.93394	TRUE	0.27389	TRUE	3	25	Amp		0.994201	N	83.6293	N	N	N
23	B11	FALSE	U251-2	HOXD11	UNKNOWN	SYBR	None				0.261714	0.156845	0.436702	24.107	24.389	0.295718		3.30207	0.460802	0.266044	1.93394	TRUE	0.27389	TRUE	3	24	Amp		0.989174	N	83.9342	N	N	N
24	B12	FALSE	U251-3	HOXD11	UNKNOWN	SYBR	None				0.261714	0.156845	0.436702	24.906	24.389	0.295718		3.30207	0.460802	0.266044	1.93394	TRUE	0.27389	TRUE	3	25	Amp		0.988896	N	83.7818	N	N	N
Analysis Type	Singleplex
Endogenous Control	GPX7
RQ Min/Max Confidence Level	95.0
Reference Sample	Sample 1

## Sheet: Sheet4
Sample Name	GAPDH	HOXD11
U251-1	21.824	24.153
U251-2	21.627	24.107
U251-3	21.716	24.906

## Sheet: Sheet5
Sample Name	GAPDH	HOXD11	ΔCT	对照组ΔT的均值	实验组相对于对照组的表达量ΔΔCt	2-ΔΔCt
HA-1	20.283	29.856	9.573	9.403
HA-2	19.987	29.128	9.141		0	2
HA-3	20.158	29.653	9.495
T98-1	18.975	25.614	6.639	9.403	-2.764	4.764
T98-2	18.254	25.652	7.398	9.403	-2.005	4.005
T98-3	18.694	25.128	6.434	9.403	-2.969	4.969
LN229-1	19.562	26.548	6.986	9.403	-2.417	4.417
LN229-2	19.254	26.362	7.108	9.403	-2.295	4.295
LN229-3	19.673	26.857	7.184	9.403	-2.219	4.219
U251-1	21.824	24.153	2.329	9.403	-7.074	9.074
U251-2	21.627	24.107	2.48	9.403	-6.923	8.923
U251-3	21.716	24.906	3.19	9.403	-6.213	8.213

## Sheet: Sheet3
Sample Name	GAPDH	HOXD11
LN229-1	19.562	26.548
LN229-2	19.254	26.362
LN229-3	19.673	26.857

## Sheet: Sheet1
	GAPDH	HOXD11	ΔCT
HA-1	20.283	29.856	9.573
HA-2	19.987	29.128	9.141
HA-3	20.158	29.653	9.495

## Sheet: Sheet2
Sample Name	GAPDH	HOXD11
T98-1	18.975	25.614
T98-2	18.254	25.652
T98-3	18.694	25.128
