# Supplementary material for: Abnormal expression of HOXD11 promotes the malignant behavior of glioma cells and leads to poor prognosis of glioma patients
Source: PeerJ. 2021 Feb 8;9:e10820. doi: 10.7717/peerj.10820 (PMC7877241; doi:10.7717/peerj.10820)
Supplement: Supplemental Information 8 [file peerj-09-10820-s008.xlsx]

## Sheet: singleGeneCliData
id	time	state	HOXD11	PRS_type	Histology	Grade	Gender	Age	Radio_status	Chemo_status	IDH_mutation_status	1p19q_codeletion_status
CGGA_1404	5.5589	0	0.0936741	Primary	AOA	WHO III	Female	>41	Yes	No	Mutant	Codel
CGGA_1071	7.87945	0	0.0294218	Primary	A	WHO II	Male	>41	Yes	No	Wildtype	Non-codel
CGGA_1011	0.29863	1	-0.207534	Primary	GBM	WHO IV	Female	>41	Yes	No	Wildtype	Non-codel
CGGA_1156	6.7863	0	0.135304	Primary	OA	WHO II	Female	<=41	Yes	No	Mutant	Non-codel
CGGA_1536	2.30137	1	0.0936741	Primary	OA	WHO II	Male	>41	No	No	Mutant	Non-codel
CGGA_605	10.0493	0	-0.207534	Recurrent	rAO	WHO III	Male	>41	Yes	Yes	Mutant	Non-codel
CGGA_1031	6.73151	1	-0.207534	Primary	A	WHO II	Female	<=41	No	Yes	Mutant	Non-codel
CGGA_1129	0.460274	1	0.982433	Secondary	sGBM	WHO IV	Male	<=41	Yes	No	Mutant	Non-codel
CGGA_752	9.55068	0	-0.207534	Primary	OA	WHO II	Male	<=41	Yes	No	Mutant	Codel
CGGA_1516	5.00274	0	0.0936741	Primary	OA	WHO II	Male	>41	Yes	Yes	Mutant	Codel
CGGA_1419	0.682192	1	0.430303	Recurrent	rGBM	WHO IV	Male	>41	Yes	Yes	Wildtype	Non-codel
CGGA_1906	2.13425	0	0.135304	Recurrent	rAA	WHO III	Male	>41	Yes	Yes	Mutant	Non-codel
CGGA_P283	1.81918	0	0.484688	Recurrent	rGBM	WHO IV	Male	<=41	Yes	Yes	Wildtype	Non-codel
CGGA_1496	0.90411	1	0.0936741	Recurrent	rGBM	WHO IV	Female	>41	Yes	Yes	Mutant	Codel
CGGA_274	1.67123	0	2.50167	Primary	GBM	WHO IV	Female	>41	Yes	Yes	Wildtype	Non-codel
CGGA_834	9.28219	0	3.53899	Primary	OA	WHO II	Male	<=41	Yes	No	Wildtype	Non-codel
CGGA_1604	2.0274	1	1.34417	Recurrent	rGBM	WHO IV	Male	>41	Yes	Yes	Mutant	Non-codel
CGGA_878	2.36438	1	2.61047	Primary	GBM	WHO IV	Male	>41	No	Yes	Wildtype	Non-codel
CGGA_1737	3.41918	0	0.0936741	Primary	AO	WHO III	Male	<=41	Yes	Yes	Mutant	Codel
CGGA_541	10.2493	0	0.769097	Primary	OA	WHO II	Female	<=41	Yes	Yes	Wildtype	Non-codel
CGGA_842	0.641096	1	2.31227	Primary	GBM	WHO IV	Female	>41	Yes	Yes	Wildtype	Non-codel
CGGA_598	10.074	1	-0.207534	Primary	AO	WHO III	Female	>41	Yes	Yes	Mutant	Codel
CGGA_543	10.2356	0	-0.207534	Primary	O	WHO II	Male	>41	Yes	No	Mutant	Codel
CGGA_1679	3.95068	0	0.0936741	Primary	AOA	WHO III	Female	>41	Yes	Yes	Mutant	Codel
CGGA_1619	2.09863	1	0.148912	Primary	AA	WHO III	Male	>41	Yes	Yes	Mutant	Non-codel
CGGA_1356	2.59726	1	0.746793	Recurrent	rAOA	WHO III	Male	>41	No	Yes	Mutant	Non-codel
CGGA_1072	2.9863	1	3.30487	Primary	GBM	WHO IV	Male	<=41	Yes	Yes	Wildtype	Non-codel
CGGA_1041	7.84384	0	0.0936741	Primary	GBM	WHO IV	Male	>41	Yes	Yes	Wildtype	Non-codel
CGGA_1012	8.53699	0	0.227908	Recurrent	rO	WHO II	Male	>41	Yes	Yes	Mutant	Non-codel
CGGA_1760	1.25753	1	2.00322	Recurrent	rA	WHO II	Male	>41	Yes	Yes	Wildtype	Non-codel
CGGA_564	1.86027	1	1.71307	Primary	AA	WHO III	Male	>41	Yes	Yes	Wildtype	Non-codel
CGGA_1223	1.86849	1	0.832697	Primary	AOA	WHO III	Male	>41	Yes	Yes	Wildtype	Non-codel
CGGA_1329	0.893151	1	2.43504	Recurrent	rAOA	WHO III	Female	>41	Yes	Yes	Mutant	Non-codel
CGGA_P298	1.73699	0	0.0936741	Recurrent	rAO	WHO III	Female	>41	Yes	No	Mutant	Codel
CGGA_1053	1.0137	1	1.44043	Primary	GBM	WHO IV	Female	>41	Yes	Yes	Wildtype	Non-codel
CGGA_P150	0.956164	0	0.0936741	Primary	OA	WHO II	Male	<=41	Yes	No	Mutant	Non-codel
CGGA_1546	0.610959	1	0.960096	Primary	GBM	WHO IV	Male	>41	No	Yes	Wildtype	Non-codel
CGGA_680	7.63836	1	-0.0097813	Primary	GBM	WHO IV	Male	>41	Yes	Yes	Wildtype	Non-codel
CGGA_831	1.49589	1	4.06476	Primary	GBM	WHO IV	Female	>41	Yes	Yes	Wildtype	Non-codel
CGGA_P106	0.194521	1	3.67102	Recurrent	rGBM	WHO IV	Male	<=41	Yes	Yes	Wildtype	Non-codel
CGGA_837	1.18356	1	3.72611	Primary	GBM	WHO IV	Male	>41	Yes	Yes	Wildtype	Non-codel
CGGA_336	6.98356	1	0.0936741	Recurrent	rAOA	WHO III	Female	>41	Yes	Yes	Mutant	Codel
CGGA_273	7.21918	1	0.792618	Primary	OA	WHO II	Female	<=41	Yes	No	Mutant	Non-codel
CGGA_1300	3.91233	1	0.0936741	Primary	AOA	WHO III	Male	<=41	Yes	Yes	Mutant	Non-codel
CGGA_1649	2.86849	0	0.16239	Primary	OA	WHO II	Male	<=41	Yes	Yes	Mutant	Codel
CGGA_1255	0.361644	1	2.97944	Recurrent	rGBM	WHO IV	Male	>41	Yes	Yes	Wildtype	Non-codel
CGGA_1387	0.246575	1	3.72121	Recurrent	rGBM	WHO IV	Male	<=41	Yes	Yes	Wildtype	Non-codel
CGGA_1569	3.85205	0	0.0936741	Primary	AOA	WHO III	Female	<=41	No	No	Wildtype	Codel
CGGA_1292	6.63288	0	-0.207534	Primary	AOA	WHO III	Male	<=41	Yes	Yes	Wildtype	Non-codel
CGGA_503	10.3479	0	0.0936741	Primary	OA	WHO II	Male	>41	Yes	Yes	Mutant	Non-codel
CGGA_825	2.29041	1	0.121564	Recurrent	rAA	WHO III	Male	<=41	Yes	Yes	Mutant	Non-codel
CGGA_1393	0.753425	1	-0.207534	Secondary	sGBM	WHO IV	Male	<=41	Yes	Yes	Wildtype	Non-codel
CGGA_1591	3.10411	1	0.0936741	Recurrent	rAOA	WHO III	Male	>41	Yes	Yes	Mutant	Non-codel
CGGA_1335	5.33425	0	0.0936741	Primary	O	WHO II	Female	>41	No	Yes	Mutant	Codel
CGGA_D36	0.0931507	1	3.16617	Recurrent	rGBM	WHO IV	Male	>41	No	No	Wildtype	Non-codel
CGGA_1631	0.605479	1	3.79533	Recurrent	rGBM	WHO IV	Female	>41	Yes	No	Wildtype	Non-codel
CGGA_D19	0.813699	1	0.849266	Recurrent	rO	WHO II	Female	>41	Yes	Yes	Mutant	Codel
CGGA_802	1.86575	1	-0.207534	Primary	GBM	WHO IV	Male	>41	Yes	Yes	Wildtype	Non-codel
CGGA_619	1.50685	1	0.0936741	Recurrent	rA	WHO II	Male	<=41	Yes	No	Wildtype	Non-codel
CGGA_501	10.4055	0	-0.207534	Primary	O	WHO II	Male	<=41	Yes	No	Mutant	Codel
CGGA_507	0.89863	1	2.16749	Recurrent	rAA	WHO III	Female	>41	No	Yes	Mutant	Non-codel
CGGA_1299	1.50685	1	1.9439	Primary	GBM	WHO IV	Male	>41	Yes	Yes	Wildtype	Non-codel
CGGA_283	9.50685	1	-0.207534	Primary	O	WHO II	Female	>41	Yes	Yes	Mutant	Codel
CGGA_1611	3.1726	1	5.13518	Recurrent	rGBM	WHO IV	Female	<=41	Yes	Yes	Mutant	Non-codel
CGGA_1145	0.654795	1	-0.207534	Recurrent	rAA	WHO III	Male	<=41	Yes	Yes	Wildtype	Non-codel
CGGA_1562	4.71507	0	0.0936741	Primary	AO	WHO III	Male	>41	Yes	No	Mutant	Codel
CGGA_P182	2.31781	0	3.86089	Recurrent	rGBM	WHO IV	Female	>41	Yes	Yes	Wildtype	Non-codel
CGGA_1642	4.27945	0	0.215046	Primary	A	WHO II	Male	>41	Yes	No	Mutant	Non-codel
CGGA_1671	4.01096	0	0.240654	Primary	AOA	WHO III	Female	<=41	Yes	Yes	Mutant	Non-codel
CGGA_1738	1.28493	1	1.26674	Primary	AA	WHO III	Male	>41	Yes	Yes	Wildtype	Non-codel
CGGA_1216	0.854795	1	1.35715	Primary	GBM	WHO IV	Male	>41	Yes	Yes	Wildtype	Non-codel
CGGA_1019	0.580822	1	2.39791	Recurrent	rGBM	WHO IV	Male	>41	No	Yes	Wildtype	Non-codel
CGGA_D52	8.37534	0	-0.207534	Primary	AO	WHO III	Male	>41	Yes	Yes	Mutant	Codel
CGGA_1284	0.265753	1	2.78434	Primary	AA	WHO III	Male	>41	No	Yes	Wildtype	Non-codel
CGGA_652	1.30411	1	0.0936741	Recurrent	rAA	WHO III	Male	>41	Yes	Yes	Mutant	Non-codel
CGGA_1431	5.41096	0	0.0936741	Primary	AA	WHO III	Male	>41	Yes	Yes	Mutant	Non-codel
CGGA_705	4.12877	1	0.148912	Primary	AA	WHO III	Male	<=41	Yes	No	Mutant	Non-codel
CGGA_1039	1.99178	1	3.2661	Primary	GBM	WHO IV	Male	<=41	No	Yes	Wildtype	Non-codel
CGGA_1236	0.523288	1	0.0936741	Primary	GBM	WHO IV	Female	>41	No	No	Wildtype	Non-codel
CGGA_1188	0.70137	1	0.141268	Secondary	sGBM	WHO IV	Female	<=41	Yes	Yes	Mutant	Non-codel
CGGA_1718	2.28767	0	0.0936741	Primary	AA	WHO III	Female	<=41	Yes	Yes	Mutant	Non-codel
CGGA_1121	7.0137	0	0.0936741	Recurrent	rAOA	WHO III	Female	<=41	Yes	Yes	Mutant	Non-codel
CGGA_D45	2.34521	0	0.90502	Recurrent	rAOA	WHO III	Male	<=41	Yes	Yes	Mutant	Non-codel
CGGA_1322	0.693151	1	-0.207534	Primary	AOA	WHO III	Male	<=41	Yes	Yes	Mutant	Non-codel
CGGA_1004	2.46301	1	-0.207534	Primary	A	WHO II	Female	>41	Yes	No	Wildtype	Non-codel
CGGA_1471	5.25753	0	0.148912	Primary	OA	WHO II	Male	>41	Yes	Yes	Mutant	Non-codel
CGGA_426	4.27397	1	2.346	Primary	AA	WHO III	Male	>41	Yes	Yes	Wildtype	Non-codel
CGGA_1411	0.90137	1	-0.207534	Recurrent	rAA	WHO III	Female	<=41	Yes	Yes	Wildtype	Non-codel
CGGA_1066	1.98082	1	0.0936741	Primary	A	WHO II	Female	<=41	Yes	No	Mutant	Non-codel
CGGA_1592	4.35068	1	0.430303	Recurrent	rAOA	WHO III	Male	<=41	Yes	Yes	Mutant	Codel
CGGA_1269	6.06575	0	0.0936741	Primary	AO	WHO III	Female	<=41	No	Yes	Mutant	Codel
CGGA_616	2.60822	1	2.68333	Primary	AA	WHO III	Male	>41	Yes	Yes	Wildtype	Non-codel
CGGA_888	1.83288	1	0.0936741	Recurrent	rAO	WHO III	Male	<=41	Yes	Yes	Mutant	Codel
CGGA_1135	3.21096	1	0.547293	Primary	GBM	WHO IV	Male	<=41	Yes	Yes	Wildtype	Non-codel
CGGA_D16	0.715068	1	-0.207534	Primary	AOA	WHO III	Female	>41	Yes	No	Wildtype	Non-codel
CGGA_1817	1.09315	1	0.0936741	Primary	GBM	WHO IV	Female	>41	Yes	Yes	Wildtype	Non-codel
CGGA_1425	1.75342	1	3.08602	Primary	GBM	WHO IV	Female	<=41	Yes	Yes	Wildtype	Codel
CGGA_P128	2.51781	0	0.135304	Primary	OA	WHO II	Male	<=41	Yes	No	Mutant	Non-codel
CGGA_1175	1.20822	1	-0.207534	Secondary	sGBM	WHO IV	Female	<=41	No	Yes	Mutant	Non-codel
CGGA_1612	1.96712	1	2.37719	Primary	GBM	WHO IV	Male	>41	Yes	Yes	Wildtype	Non-codel
CGGA_1345	5.78904	0	0.121564	Primary	OA	WHO II	Male	>41	Yes	No	Mutant	Codel
CGGA_1785	0.90137	1	0.227908	Recurrent	rGBM	WHO IV	Male	<=41	Yes	Yes	Mutant	Non-codel
CGGA_1641	0.79726	1	0.188964	Recurrent	rGBM	WHO IV	Female	>41	Yes	Yes	Wildtype	Non-codel
CGGA_780	2.52877	1	0.135304	Recurrent	rAO	WHO III	Female	>41	No	Yes	Wildtype	Non-codel
CGGA_1703	3.74247	0	0.0936741	Primary	OA	WHO II	Female	<=41	Yes	Yes	Mutant	Non-codel
CGGA_1049	2.21644	1	2.25433	Primary	GBM	WHO IV	Male	>41	Yes	Yes	Wildtype	Non-codel
CGGA_1246	6.82466	0	-0.207534	Primary	AO	WHO III	Male	>41	Yes	Yes	Mutant	Codel
CGGA_1854	2.5589	0	0.175739	Primary	AA	WHO III	Male	<=41	Yes	Yes	Mutant	Non-codel
CGGA_1523	4.94247	0	0.148912	Primary	OA	WHO II	Male	>41	Yes	Yes	Mutant	Non-codel
CGGA_P98	0.868493	1	0.0936741	Recurrent	rAOA	WHO III	Male	>41	Yes	Yes	Mutant	Non-codel
CGGA_1321	1.92329	1	0.350454	Primary	AOA	WHO III	Male	>41	Yes	Yes	Mutant	Non-codel
CGGA_1388	1.32877	1	-0.207534	Recurrent	rAA	WHO III	Male	<=41	Yes	Yes	Mutant	Non-codel
CGGA_P270	0.882192	1	1.303	Recurrent	rA	WHO II	Male	<=41	Yes	Yes	Mutant	Non-codel
CGGA_1441	3.67123	1	1.5488	Primary	GBM	WHO IV	Male	>41	Yes	Yes	Wildtype	Non-codel
CGGA_1412	0.810959	1	1.15714	Secondary	sGBM	WHO IV	Female	>41	Yes	Yes	Mutant	Codel
CGGA_406	0.246575	1	2.42373	Recurrent	rAOA	WHO III	Female	<=41	No	No	Mutant	Non-codel
CGGA_1662	4.09041	0	0.0936741	Primary	OA	WHO II	Female	>41	Yes	No	Mutant	Codel
CGGA_1313	1.03836	1	3.34555	Primary	GBM	WHO IV	Male	>41	Yes	Yes	Wildtype	Non-codel
CGGA_1571	1.12877	0	0.0936741	Primary	GBM	WHO IV	Female	>41	Yes	Yes	Mutant	Non-codel
CGGA_1901	1.47945	1	2.47659	Primary	GBM	WHO IV	Male	>41	Yes	Yes	Wildtype	Non-codel
CGGA_1204	6.40548	0	0.0936741	Primary	O	WHO II	Male	>41	No	Yes	Mutant	Codel
CGGA_655	9.86301	0	-0.207534	Primary	O	WHO II	Male	<=41	Yes	No	Mutant	Codel
CGGA_1036	3.19452	1	0.674085	Primary	GBM	WHO IV	Male	<=41	Yes	Yes	Wildtype	Non-codel
CGGA_725	9.74795	0	-0.207534	Primary	OA	WHO II	Male	>41	Yes	No	Mutant	Codel
CGGA_1239	6.24658	0	0.135304	Primary	O	WHO II	Female	>41	Yes	Yes	Mutant	Codel
CGGA_1108	2.38356	1	3.60741	Primary	AOA	WHO III	Female	<=41	Yes	Yes	Wildtype	Non-codel
CGGA_D11	2.26575	1	2.05911	Primary	AOA	WHO III	Female	>41	Yes	Yes	Wildtype	Non-codel
CGGA_D34	0.40274	1	0.141268	Secondary	sGBM	WHO IV	Male	>41	No	No	Mutant	Non-codel
CGGA_509	1.70685	1	3.79736	Primary	GBM	WHO IV	Male	<=41	Yes	Yes	Wildtype	Non-codel
CGGA_678	1.05753	1	3.98636	Recurrent	rAA	WHO III	Male	>41	Yes	Yes	Wildtype	Non-codel
CGGA_634	7.2137	1	0.121564	Primary	AOA	WHO III	Female	<=41	Yes	Yes	Mutant	Non-codel
CGGA_642	9.91233	0	-0.207534	Primary	A	WHO II	Male	<=41	Yes	No	Mutant	Non-codel
CGGA_1219	5.80822	1	-0.207534	Primary	GBM	WHO IV	Female	>41	Yes	Yes	Mutant	Non-codel
CGGA_1099	0.334247	1	3.66009	Secondary	sGBM	WHO IV	Male	<=41	No	Yes	Wildtype	Non-codel
CGGA_1462	0.515068	1	1.23578	Primary	GBM	WHO IV	Male	>41	Yes	Yes	Wildtype	Non-codel
CGGA_521	1.40822	1	0.0936741	Primary	AA	WHO III	Male	<=41	Yes	Yes	Wildtype	Non-codel
CGGA_822	6.12877	1	-0.207534	Secondary	sGBM	WHO IV	Male	>41	Yes	Yes	Mutant	Non-codel
CGGA_1840	2.6411	0	1.97388	Primary	GBM	WHO IV	Female	>41	Yes	Yes	Wildtype	Non-codel
CGGA_P102	2.70959	0	0.0936741	Primary	GBM	WHO IV	Male	<=41	Yes	Yes	Mutant	Non-codel
CGGA_1491	1.4	1	0.148912	Primary	GBM	WHO IV	Male	<=41	Yes	Yes	Mutant	Non-codel
CGGA_662	0.778082	1	-0.207534	Primary	OA	WHO II	Female	>41	No	No	Mutant	Codel
CGGA_1113	3.46575	1	-0.207534	Primary	AOA	WHO III	Male	<=41	No	Yes	Mutant	Codel
CGGA_1343	0.257534	1	3.62119	Recurrent	rGBM	WHO IV	Male	<=41	Yes	Yes	Wildtype	Non-codel
CGGA_D33	0.479452	1	0.52056	Recurrent	rAA	WHO III	Male	<=41	No	No	Mutant	Non-codel
CGGA_633	4.96438	1	0.853605	Primary	O	WHO II	Female	>41	Yes	Yes	Wildtype	Non-codel
CGGA_1902	2.16438	0	0.202065	Primary	OA	WHO II	Male	<=41	No	No	Mutant	Non-codel
CGGA_1541	0.221918	1	1.82549	Recurrent	rGBM	WHO IV	Female	>41	Yes	Yes	Wildtype	Non-codel
CGGA_1572	0.438356	1	0.253285	Recurrent	rGBM	WHO IV	Female	>41	Yes	Yes	Wildtype	Non-codel
CGGA_J030	7.60274	0	-0.207534	Primary	OA	WHO II	Male	<=41	Yes	No	Mutant	Codel
CGGA_D37	2.64384	1	0.823419	Primary	GBM	WHO IV	Male	>41	Yes	Yes	Wildtype	Non-codel
CGGA_P7	0.30137	1	2.01046	Recurrent	rGBM	WHO IV	Male	>41	Yes	No	Wildtype	Non-codel
CGGA_1655	3.31233	0	0.0936741	Primary	OA	WHO II	Male	>41	Yes	No	Mutant	Non-codel
CGGA_1553	1.47945	1	0.0936741	Recurrent	rAOA	WHO III	Male	<=41	Yes	Yes	Mutant	Non-codel
CGGA_1152	6.80548	0	0.121564	Primary	A	WHO II	Male	<=41	Yes	Yes	Wildtype	Non-codel
CGGA_1461	0.619178	1	3.5162	Primary	GBM	WHO IV	Female	>41	Yes	Yes	Wildtype	Non-codel
CGGA_J024	7.67397	0	-0.207534	Recurrent	rA	WHO II	Female	<=41	No	No	Mutant	Non-codel
CGGA_1623	4.39178	0	0.121564	Primary	AOA	WHO III	Female	<=41	Yes	No	Wildtype	Non-codel
CGGA_1870	2.36712	0	0.135304	Primary	GBM	WHO IV	Male	>41	Yes	Yes	Mutant	Codel
CGGA_1492	0.734247	1	1.96644	Recurrent	rGBM	WHO IV	Female	>41	Yes	Yes	Wildtype	Non-codel
CGGA_P144	2.44384	0	0.0936741	Primary	AOA	WHO III	Male	>41	Yes	Yes	Mutant	Non-codel
CGGA_P314	1.56712	0	0.121564	Recurrent	rAO	WHO III	Female	<=41	No	No	Mutant	Codel
CGGA_762	9.51781	0	-0.207534	Primary	OA	WHO II	Female	<=41	Yes	No	Mutant	Codel
CGGA_1091	3.05753	1	2.82738	Primary	GBM	WHO IV	Female	>41	Yes	Yes	Wildtype	Non-codel
CGGA_551	10.2137	0	-0.207534	Primary	O	WHO II	Male	>41	Yes	No	Mutant	Codel
CGGA_852	0.463014	1	2.90873	Primary	AA	WHO III	Male	<=41	Yes	No	Wildtype	Non-codel
CGGA_1770	0.816438	1	0.215046	Recurrent	rGBM	WHO IV	Female	>41	No	Yes	Mutant	Non-codel
CGGA_1180	7.2	0	1.80332	Primary	GBM	WHO IV	Female	>41	Yes	Yes	Wildtype	Non-codel
CGGA_1596	0.561644	1	2.67692	Primary	GBM	WHO IV	Male	>41	Yes	Yes	Wildtype	Non-codel
CGGA_1579	4.14247	0	0.135304	Primary	OA	WHO II	Male	<=41	No	No	Wildtype	Non-codel
CGGA_1476	0.819178	1	2.61717	Primary	GBM	WHO IV	Female	>41	No	No	Wildtype	Non-codel
CGGA_314	7.03562	1	-0.207534	Recurrent	rAO	WHO III	Male	<=41	Yes	Yes	Mutant	Codel
CGGA_1231	6.24384	1	0.0550026	Recurrent	rAA	WHO III	Female	<=41	Yes	Yes	Wildtype	Non-codel
CGGA_1126	2.14795	1	3.8004	Primary	AOA	WHO III	Male	>41	Yes	Yes	Mutant	Non-codel
CGGA_625	5.74795	1	0.0936741	Recurrent	rAOA	WHO III	Female	<=41	No	No	Mutant	Codel
CGGA_1539	4.81644	0	0.0936741	Primary	GBM	WHO IV	Male	>41	Yes	Yes	Mutant	Non-codel
CGGA_446	10.5753	0	-0.207534	Primary	O	WHO II	Female	<=41	Yes	No	Mutant	Codel
CGGA_333	4.88493	0	0.52056	Primary	OA	WHO II	Male	<=41	Yes	No	Mutant	Non-codel
CGGA_1211	6.36712	0	0.0936741	Primary	OA	WHO II	Male	<=41	No	No	Mutant	Codel
CGGA_1159	6.75068	0	0.121564	Primary	OA	WHO II	Male	>41	No	Yes	Mutant	Non-codel
CGGA_276	1.44932	0	0.404408	Primary	O	WHO II	Male	>41	No	No	Mutant	Non-codel
CGGA_1271	1.43288	1	3.2154	Recurrent	rGBM	WHO IV	Male	<=41	Yes	Yes	Wildtype	Non-codel
CGGA_1504	5.07945	0	0.0936741	Primary	AOA	WHO III	Female	>41	Yes	Yes	Mutant	Non-codel
CGGA_1566	4.70137	0	0.148912	Primary	AOA	WHO III	Female	>41	Yes	Yes	Mutant	Codel
CGGA_P174	2.23562	0	0.121564	Primary	OA	WHO II	Male	<=41	Yes	Yes	Mutant	Codel
CGGA_1055	4.4137	1	0.0936741	Primary	AA	WHO III	Male	>41	Yes	Yes	Mutant	Non-codel
CGGA_1740	0.994521	1	0.227908	Primary	GBM	WHO IV	Female	>41	No	No	Wildtype	Non-codel
CGGA_490	10.4219	0	-0.207534	Primary	AO	WHO III	Female	<=41	Yes	Yes	Mutant	Codel
CGGA_1380	0.79726	1	0.0936741	Primary	GBM	WHO IV	Male	>41	Yes	Yes	Wildtype	Non-codel
CGGA_457	0.205479	1	0.0936741	Recurrent	rAOA	WHO III	Male	<=41	No	No	Mutant	Non-codel
CGGA_1061	1.45753	1	-0.133898	Recurrent	rAOA	WHO III	Female	>41	Yes	Yes	Mutant	Non-codel
CGGA_1307	6.54795	0	-0.0364941	Primary	AOA	WHO III	Female	<=41	Yes	Yes	Mutant	Non-codel
CGGA_P109	1.11233	1	4.95126	Recurrent	rGBM	WHO IV	Male	<=41	Yes	Yes	Mutant	Non-codel
CGGA_279	3.6	1	1.31489	Recurrent	rAOA	WHO III	Female	>41	Yes	Yes	Mutant	Non-codel
CGGA_1669	0.380822	1	3.07927	Primary	AOA	WHO III	Female	>41	No	No	Wildtype	Non-codel
CGGA_P27	1.13151	0	0.135304	Primary	OA	WHO II	Female	<=41	Yes	No	Mutant	Non-codel
CGGA_1232	5.66301	1	0.215046	Primary	AOA	WHO III	Male	<=41	Yes	Yes	Mutant	Non-codel
CGGA_1326	0.882192	1	2.79552	Primary	GBM	WHO IV	Male	>41	Yes	No	Mutant	Non-codel
CGGA_P21	3.27397	0	0.385231	Primary	A	WHO II	Male	<=41	Yes	Yes	Mutant	Non-codel
CGGA_731	1.37808	1	3.01877	Primary	GBM	WHO IV	Male	>41	Yes	No	Wildtype	Non-codel
CGGA_1023	1.86575	1	2.20021	Primary	GBM	WHO IV	Female	>41	Yes	Yes	Wildtype	Non-codel
CGGA_1212	6.27945	1	0.0936741	Primary	AOA	WHO III	Male	<=41	Yes	Yes	Mutant	Non-codel
CGGA_1359	0.939726	1	0.0936741	Recurrent	rAOA	WHO III	Male	<=41	Yes	Yes	Wildtype	Non-codel
CGGA_P157	1.28767	1	1.29702	Primary	AOA	WHO III	Female	>41	Yes	Yes	Wildtype	Non-codel
CGGA_1272	0.339726	1	2.68555	Secondary	sGBM	WHO IV	Male	<=41	No	Yes	Mutant	Non-codel
CGGA_1370	6.32877	0	2.45586	Recurrent	rGBM	WHO IV	Male	>41	No	Yes	Wildtype	Non-codel
CGGA_458	1.14795	1	-0.177647	Recurrent	rOA	WHO II	Male	>41	Yes	Yes	Mutant	Non-codel
CGGA_1140	2.52329	1	-0.207534	Recurrent	rAA	WHO III	Female	>41	No	Yes	Wildtype	Non-codel
CGGA_252	0.452055	0	-0.207534	Primary	A	WHO II	Female	<=41	Yes	No	Mutant	Non-codel
CGGA_1330	6.48219	0	-0.207534	Primary	A	WHO II	Male	>41	Yes	Yes	Mutant	Non-codel
CGGA_P176	2.20274	0	0.135304	Primary	OA	WHO II	Female	<=41	Yes	No	Mutant	Codel
CGGA_1564	0.520548	1	4.15896	Primary	GBM	WHO IV	Male	>41	Yes	Yes	Wildtype	Non-codel
CGGA_245	0.871233	1	0.00339987	Recurrent	rAA	WHO III	Female	<=41	Yes	Yes	Mutant	Non-codel
CGGA_1644	0.473973	1	3.505	Primary	GBM	WHO IV	Male	>41	Yes	Yes	Wildtype	Non-codel
CGGA_236	1.93425	0	-0.207534	Primary	O	WHO II	Male	>41	Yes	Yes	Mutant	Codel
CGGA_499	0.334247	1	0.831023	Primary	GBM	WHO IV	Male	>41	Yes	No	Wildtype	Non-codel
CGGA_P199	0.556164	1	4.28438	Recurrent	rGBM	WHO IV	Male	>41	No	No	Wildtype	Non-codel
CGGA_1946	0.389041	1	2.0284	Recurrent	rGBM	WHO IV	Female	>41	Yes	Yes	Wildtype	Non-codel
CGGA_1282	3.05753	1	1.24203	Primary	GBM	WHO IV	Female	<=41	Yes	Yes	Wildtype	Non-codel
CGGA_P28	0.293151	1	1.75801	Primary	GBM	WHO IV	Male	>41	No	No	Wildtype	Non-codel
CGGA_1865	0.243836	1	4.3572	Recurrent	rGBM	WHO IV	Female	>41	No	No	Wildtype	Non-codel
CGGA_738	9.59178	0	0.610961	Primary	A	WHO II	Male	>41	Yes	No	Mutant	Non-codel
CGGA_1324	2.32329	1	0.0676323	Secondary	sGBM	WHO IV	Male	>41	Yes	Yes	Mutant	Codel
CGGA_1444	1.30411	1	3.884	Primary	GBM	WHO IV	Female	>41	Yes	Yes	Wildtype	Non-codel
CGGA_1002	0.835616	1	1.1453	Primary	AA	WHO III	Female	>41	Yes	Yes	Wildtype	Non-codel
CGGA_265	10.8466	0	0.0936741	Recurrent	rA	WHO II	Male	>41	Yes	Yes	Mutant	Non-codel
CGGA_1340	3.03836	1	-0.207534	Primary	AOA	WHO III	Male	<=41	Yes	Yes	Wildtype	Non-codel
CGGA_1170	0.947945	1	2.02855	Secondary	sGBM	WHO IV	Male	<=41	Yes	Yes	Mutant	Non-codel
CGGA_1457	0.854795	1	1.28499	Primary	GBM	WHO IV	Male	>41	Yes	Yes	Wildtype	Non-codel
CGGA_1634	1.00274	1	0.385231	Primary	GBM	WHO IV	Female	<=41	No	No	Wildtype	Non-codel
CGGA_1420	0.99726	1	0.314797	Primary	GBM	WHO IV	Male	>41	Yes	Yes	Wildtype	Non-codel
CGGA_1527	4.69589	1	0.227908	Primary	AOA	WHO III	Male	>41	Yes	Yes	Mutant	Non-codel
CGGA_1614	2.95616	1	0.0936741	Recurrent	rAA	WHO III	Male	>41	Yes	Yes	Mutant	Non-codel
CGGA_810	1.50959	1	0.202065	Recurrent	rAO	WHO III	Male	<=41	Yes	Yes	Wildtype	Non-codel
CGGA_P146	0.942466	0	0.240654	Recurrent	rA	WHO II	Male	<=41	Yes	Yes	Mutant	Non-codel
CGGA_905	8.69589	1	-0.207534	Primary	A	WHO II	Male	>41	Yes	No	Mutant	Non-codel
CGGA_1686	0.964384	0	0.0936741	Primary	AA	WHO III	Male	<=41	No	Yes	Wildtype	Non-codel
CGGA_1916	0	0	4.05803	Primary	GBM	WHO IV	Female	<=41	No	No	Mutant	Non-codel
CGGA_1197	2.58082	1	1.40456	Secondary	sGBM	WHO IV	Male	>41	Yes	Yes	Mutant	Codel
CGGA_1228	6.29041	0	0.0936741	Primary	OA	WHO II	Male	<=41	No	Yes	Wildtype	Non-codel
CGGA_1281	6.65479	0	-0.207534	Primary	AOA	WHO III	Male	>41	Yes	Yes	Wildtype	Codel
CGGA_1833	1.35342	1	4.04361	Primary	GBM	WHO IV	Female	>41	Yes	Yes	Wildtype	Non-codel
CGGA_1409	6.16164	0	-0.207534	Primary	GBM	WHO IV	Female	<=41	Yes	Yes	Mutant	Non-codel
CGGA_599	1.14521	1	0.729062	Primary	AO	WHO III	Female	>41	Yes	No	Wildtype	Non-codel
CGGA_1620	3.90959	0	0.0936741	Primary	AOA	WHO III	Male	>41	Yes	Yes	Mutant	Codel
CGGA_1434	0.221918	1	2.39654	Recurrent	rAA	WHO III	Male	>41	Yes	Yes	Wildtype	Non-codel
CGGA_777	0.4	1	0.278213	Recurrent	rGBM	WHO IV	Male	>41	Yes	No	Wildtype	Non-codel
CGGA_1124	1.32603	1	3.19019	Primary	GBM	WHO IV	Male	>41	Yes	Yes	Wildtype	Non-codel
CGGA_560	10.1973	0	0.776978	Primary	AOA	WHO III	Male	>41	Yes	No	Mutant	Non-codel
CGGA_374	1.35068	1	1.02971	Secondary	sGBM	WHO IV	Male	<=41	Yes	Yes	Mutant	Non-codel
CGGA_1058	2.72603	1	0.0936741	Recurrent	rA	WHO II	Male	<=41	Yes	Yes	Mutant	Non-codel
CGGA_1001	9.00822	0	-0.207534	Primary	GBM	WHO IV	Male	<=41	No	Yes	Wildtype	Non-codel
CGGA_1589	0.936986	1	0.362142	Recurrent	rA	WHO II	Male	>41	Yes	Yes	Wildtype	Non-codel
CGGA_1402	5.56164	0	3.76448	Primary	GBM	WHO IV	Male	<=41	Yes	Yes	Wildtype	Non-codel
CGGA_P392	1.19726	0	0.0936741	Recurrent	rA	WHO II	Male	<=41	No	Yes	Mutant	Codel
CGGA_638	6.53699	0	-0.162922	Primary	O	WHO II	Male	>41	Yes	No	Mutant	Codel
CGGA_D38	1.88767	1	2.29512	Recurrent	rGBM	WHO IV	Female	<=41	Yes	No	Mutant	Codel
CGGA_139	1.90137	1	0.0936741	Primary	GBM	WHO IV	Male	>41	Yes	Yes	Mutant	Non-codel
CGGA_889	8.80274	0	0.0936741	Primary	A	WHO II	Male	<=41	Yes	Yes	Mutant	Non-codel
CGGA_1773	0.284932	1	3.65201	Recurrent	rGBM	WHO IV	Female	>41	Yes	Yes	Wildtype	Non-codel
CGGA_1826	0.120548	1	0.990223	Primary	GBM	WHO IV	Female	>41	No	No	Wildtype	Non-codel
CGGA_1183	1.11781	1	0.148912	Primary	AA	WHO III	Female	<=41	Yes	Yes	Wildtype	Non-codel
CGGA_1713	0.909589	1	1.72744	Primary	GBM	WHO IV	Male	>41	Yes	Yes	Wildtype	Non-codel
CGGA_1105	1.66849	1	-0.207534	Secondary	sGBM	WHO IV	Male	<=41	Yes	Yes	Mutant	Non-codel
CGGA_1264	6.07397	0	0.0936741	Primary	AO	WHO III	Female	<=41	No	Yes	Mutant	Codel
CGGA_400	3.61918	1	-0.207534	Recurrent	rAA	WHO III	Female	<=41	Yes	No	Mutant	Non-codel
CGGA_P99	1.86027	0	0.0936741	Recurrent	rGBM	WHO IV	Male	>41	Yes	Yes	Mutant	Non-codel
CGGA_1880	2.34247	0	0.202065	Recurrent	rAA	WHO III	Female	<=41	No	No	Mutant	Non-codel
CGGA_1398	1.51781	1	0.148912	Recurrent	rAOA	WHO III	Male	>41	Yes	Yes	Mutant	Non-codel
CGGA_1401	4.60274	1	0.188964	Primary	AA	WHO III	Male	<=41	Yes	Yes	Mutant	Non-codel
CGGA_1074	0.235616	1	0.883199	Primary	GBM	WHO IV	Male	>41	Yes	Yes	Wildtype	Non-codel
CGGA_P155	2.23836	0	0.148912	Primary	A	WHO II	Male	>41	Yes	No	Wildtype	Non-codel
CGGA_1014	0.720548	1	0.253285	Primary	A	WHO II	Male	>41	No	Yes	Wildtype	Non-codel
CGGA_671	9.81918	0	-0.207534	Primary	OA	WHO II	Female	<=41	Yes	No	Mutant	Codel
CGGA_1708	3.07397	1	0.373734	Primary	GBM	WHO IV	Female	>41	Yes	Yes	Wildtype	Non-codel
CGGA_1458	0.347945	1	0.16239	Recurrent	rAOA	WHO III	Female	>41	Yes	Yes	Mutant	Codel
CGGA_1034	2.06301	1	-0.207534	Primary	AA	WHO III	Male	<=41	Yes	No	Wildtype	Non-codel
CGGA_2002	1.43562	0	0.0936741	Recurrent	rA	WHO II	Male	<=41	Yes	Yes	Mutant	Non-codel
CGGA_1743	3.37534	0	0.0936741	Primary	AOA	WHO III	Female	>41	No	No	Mutant	Non-codel
CGGA_1528	4.91233	0	0.215046	Primary	O	WHO II	Female	<=41	Yes	No	Mutant	Codel
CGGA_1305	5.44932	0	0.0936741	Primary	AOA	WHO III	Male	>41	Yes	Yes	Mutant	Non-codel
CGGA_1601	1.94521	1	4.5655	Primary	GBM	WHO IV	Male	>41	Yes	Yes	Wildtype	Non-codel
CGGA_1658	4.12877	0	0.0936741	Recurrent	rGBM	WHO IV	Female	>41	Yes	Yes	Wildtype	Non-codel
CGGA_1227	3.27945	1	2.96441	Recurrent	rGBM	WHO IV	Female	>41	Yes	No	Wildtype	Non-codel
CGGA_1020	3.06849	1	-0.207534	Primary	A	WHO II	Female	<=41	Yes	No	Mutant	Non-codel
CGGA_485	6.67671	0	-0.207534	Primary	O	WHO II	Male	<=41	Yes	No	Mutant	Codel
CGGA_1057	4.24384	1	0.0936741	Primary	OA	WHO II	Female	>41	Yes	Yes	Wildtype	Non-codel
CGGA_P142	2.4411	0	0.0936741	Primary	AOA	WHO III	Male	>41	Yes	Yes	Mutant	Codel
CGGA_1715	2.38904	0	0.0936741	Primary	O	WHO II	Female	<=41	No	No	Wildtype	Non-codel
CGGA_1185	2.00274	1	0.215046	Recurrent	rAOA	WHO III	Female	>41	Yes	Yes	Wildtype	Non-codel
CGGA_P111	2.66027	0	0.0936741	Primary	OA	WHO II	Female	>41	Yes	No	Mutant	Codel
CGGA_1682	0.945205	1	3.58987	Recurrent	rGBM	WHO IV	Male	>41	Yes	Yes	Wildtype	Non-codel
CGGA_881	0.690411	1	0.0936741	Recurrent	rAOA	WHO III	Female	<=41	Yes	Yes	Wildtype	Non-codel
CGGA_676	1.03014	1	1.15102	Primary	GBM	WHO IV	Male	>41	Yes	No	Wildtype	Non-codel
CGGA_1735	2.2274	1	0.0936741	Primary	GBM	WHO IV	Male	>41	Yes	Yes	Wildtype	Non-codel
CGGA_P131	2.54521	0	0.148912	Primary	AOA	WHO III	Female	>41	Yes	Yes	Mutant	Codel
CGGA_789	0.945205	1	2.48909	Primary	GBM	WHO IV	Male	>41	Yes	No	Wildtype	Non-codel
CGGA_420	9.6274	0	0.0936741	Recurrent	rAO	WHO III	Female	<=41	Yes	Yes	Mutant	Codel
CGGA_P280	1.84932	0	0.0936741	Recurrent	rGBM	WHO IV	Female	>41	Yes	Yes	Wildtype	Non-codel
CGGA_1829	2.19452	0	0.0936741	Primary	OA	WHO II	Male	<=41	No	No	Wildtype	Non-codel
CGGA_1953	0.2	1	2.30583	Recurrent	rGBM	WHO IV	Male	>41	Yes	Yes	Wildtype	Non-codel
CGGA_1318	4.10137	0	0.338668	Primary	OA	WHO II	Male	<=41	Yes	No	Mutant	Non-codel
CGGA_1148	1.63288	1	0.557462	Primary	A	WHO II	Male	<=41	Yes	Yes	Mutant	Non-codel
CGGA_D30	0.589041	1	0.153199	Primary	GBM	WHO IV	Male	>41	Yes	No	Wildtype	Non-codel
CGGA_630	10.0493	0	-0.207534	Recurrent	rAO	WHO III	Male	>41	Yes	No	Mutant	Codel
CGGA_1338	3.07397	1	2.85143	Primary	GBM	WHO IV	Female	>41	Yes	Yes	Wildtype	Non-codel
CGGA_P93	2.76712	0	0.0936741	Primary	A	WHO II	Female	>41	No	No	Mutant	Non-codel
CGGA_1502	5.09863	0	0.0936741	Primary	OA	WHO II	Female	<=41	No	No	Mutant	Codel
CGGA_1103	1.60274	1	1.50812	Primary	GBM	WHO IV	Female	<=41	Yes	Yes	Mutant	Non-codel
CGGA_1257	0.526027	1	0.0936741	Recurrent	rGBM	WHO IV	Male	>41	Yes	Yes	Wildtype	Non-codel
CGGA_1094	0.690411	1	1.99386	Recurrent	rAOA	WHO III	Female	<=41	No	Yes	Mutant	Non-codel
CGGA_1681	0.947945	1	0.227908	Primary	GBM	WHO IV	Female	>41	Yes	Yes	Wildtype	Codel
CGGA_P112	2.28493	1	0.362142	Primary	GBM	WHO IV	Male	>41	Yes	Yes	Wildtype	Non-codel
CGGA_679	0.720548	1	1.43027	Primary	GBM	WHO IV	Female	>41	Yes	No	Wildtype	Non-codel
CGGA_1027	7.36438	0	-0.207534	Primary	AOA	WHO III	Male	<=41	Yes	Yes	Mutant	Codel
CGGA_P132	2.56438	0	0.175739	Primary	OA	WHO II	Male	>41	Yes	No	Mutant	Codel
CGGA_884	3.09863	1	-0.207534	Primary	A	WHO II	Female	>41	Yes	Yes	Mutant	Non-codel
CGGA_288	2.89589	1	0.0936741	Recurrent	rO	WHO II	Male	>41	Yes	No	Mutant	Codel
CGGA_1050	8.32877	0	-0.207534	Primary	OA	WHO II	Male	<=41	Yes	No	Mutant	Codel
CGGA_482	6.87945	1	0.0936741	Primary	OA	WHO II	Male	>41	Yes	Yes	Mutant	Codel
CGGA_1006	0.69589	1	0.961711	Primary	AOA	WHO III	Male	>41	Yes	Yes	Wildtype	Non-codel
CGGA_1178	1.15616	1	0.148912	Recurrent	rAOA	WHO III	Male	<=41	Yes	Yes	Mutant	Non-codel
CGGA_1234	1.93151	1	0.729062	Primary	GBM	WHO IV	Male	<=41	Yes	Yes	Wildtype	Non-codel
CGGA_1118	1.09041	1	-0.133898	Recurrent	rAA	WHO III	Male	<=41	No	No	Mutant	Non-codel
CGGA_1558	0.356164	1	2.55968	Recurrent	rGBM	WHO IV	Male	>41	Yes	Yes	Wildtype	Non-codel
CGGA_1214	1.65479	1	-0.207534	Primary	GBM	WHO IV	Female	>41	Yes	Yes	Wildtype	Non-codel
CGGA_1911	2.08767	0	3.01174	Recurrent	rGBM	WHO IV	Male	<=41	Yes	Yes	Wildtype	Non-codel
CGGA_1286	6.01096	0	0.0936741	Primary	O	WHO II	Female	>41	Yes	Yes	Mutant	Codel
CGGA_1138	1.12603	1	1.23578	Primary	GBM	WHO IV	Male	>41	Yes	Yes	Wildtype	Non-codel
CGGA_1390	5.61644	0	0.148912	Recurrent	rAOA	WHO III	Male	>41	Yes	Yes	Mutant	Non-codel
CGGA_1664	4.08493	0	0.0936741	Primary	O	WHO II	Female	<=41	Yes	No	Mutant	Non-codel
CGGA_1544	0.569863	1	0.0936741	Primary	AOA	WHO III	Female	<=41	No	No	Mutant	Non-codel
CGGA_2006	1.4137	0	0.0936741	Recurrent	rAA	WHO III	Male	>41	Yes	Yes	Mutant	Non-codel
CGGA_730	5.80274	1	0.0936741	Recurrent	rOA	WHO II	Female	>41	Yes	No	Mutant	Codel
CGGA_P20	3.27671	0	0.0936741	Primary	A	WHO II	Female	>41	Yes	No	Mutant	Non-codel
CGGA_1354	1.45205	1	1.47154	Primary	GBM	WHO IV	Female	<=41	Yes	Yes	Wildtype	Non-codel
CGGA_1147	6.84384	0	0.0936741	Primary	A	WHO II	Male	<=41	No	Yes	Mutant	Non-codel
CGGA_1377	5.66575	0	0.0936741	Primary	AOA	WHO III	Male	<=41	Yes	Yes	Mutant	Non-codel
CGGA_491	2.94247	1	-0.0774713	Primary	GBM	WHO IV	Female	<=41	Yes	Yes	Mutant	Non-codel
CGGA_689	9.76164	0	-0.207534	Primary	O	WHO II	Female	<=41	Yes	No	Mutant	Codel
CGGA_P179	2.13151	0	0.0936741	Primary	OA	WHO II	Female	>41	Yes	Yes	Mutant	Non-codel
CGGA_1863	2.47123	0	0.135304	Recurrent	rAOA	WHO III	Female	>41	Yes	Yes	Mutant	Codel
CGGA_493	6.52603	1	-0.133898	Primary	A	WHO II	Female	<=41	Yes	Yes	Mutant	Non-codel
CGGA_838	9.27671	0	-0.207534	Primary	OA	WHO II	Female	<=41	Yes	Yes	Mutant	Codel
CGGA_448	0.969863	1	-0.207534	Primary	AOA	WHO III	Male	>41	Yes	Yes	Wildtype	Non-codel
CGGA_1190	7.12877	0	0.49235	Primary	AOA	WHO III	Female	>41	Yes	Yes	Mutant	Non-codel
CGGA_1586	0.635616	1	3.00284	Primary	GBM	WHO IV	Female	>41	Yes	Yes	Wildtype	Non-codel
CGGA_1650	3.51507	1	0.121564	Primary	GBM	WHO IV	Male	<=41	Yes	Yes	Mutant	Non-codel
CGGA_1258	0.312329	1	2.90419	Primary	GBM	WHO IV	Male	>41	No	No	Wildtype	Non-codel
CGGA_1729	0.668493	1	1.94012	Recurrent	rGBM	WHO IV	Male	>41	Yes	Yes	Wildtype	Non-codel
CGGA_1627	4.37534	0	0.0936741	Primary	AOA	WHO III	Male	<=41	Yes	Yes	Mutant	Non-codel
CGGA_568	0.780822	1	0.278213	Recurrent	rGBM	WHO IV	Male	<=41	No	Yes	Wildtype	Non-codel
CGGA_1534	0.112329	1	0.175739	Primary	GBM	WHO IV	Female	>41	No	No	Mutant	Non-codel
CGGA_330	3.07123	1	1.94753	Primary	AOA	WHO III	Male	>41	Yes	Yes	Wildtype	Non-codel
CGGA_710	1.80822	1	-0.207534	Primary	GBM	WHO IV	Male	<=41	No	Yes	Mutant	Non-codel
CGGA_1406	5.90137	1	0.165036	Primary	OA	WHO II	Male	<=41	Yes	Yes	Mutant	Non-codel
CGGA_1081	0.591781	1	1.49025	Recurrent	rAA	WHO III	Female	<=41	Yes	No	Wildtype	Non-codel
CGGA_1694	1.70959	1	0.773118	Primary	GBM	WHO IV	Male	>41	Yes	Yes	Wildtype	Non-codel
CGGA_1689	3.87397	0	0.121564	Primary	A	WHO II	Male	>41	Yes	No	Mutant	Non-codel
CGGA_1450	2.62192	1	-0.207534	Secondary	sGBM	WHO IV	Male	<=41	Yes	Yes	Mutant	Codel
CGGA_1177	1.23014	1	2.68555	Recurrent	rGBM	WHO IV	Male	<=41	Yes	Yes	Wildtype	Non-codel
CGGA_1700	3.7589	0	0.0936741	Primary	AOA	WHO III	Male	>41	Yes	Yes	Mutant	Codel
CGGA_494	10.4164	0	0.153199	Primary	GBM	WHO IV	Female	>41	Yes	Yes	Wildtype	Non-codel
CGGA_P295	0.747945	1	3.01174	Recurrent	rGBM	WHO IV	Male	>41	Yes	Yes	Wildtype	Non-codel
CGGA_1815	0.506849	1	1.6077	Recurrent	rGBM	WHO IV	Female	>41	Yes	Yes	Wildtype	Non-codel
CGGA_591	4.53151	1	-0.207534	Primary	AOA	WHO III	Female	>41	Yes	Yes	Mutant	Non-codel
CGGA_1875	2.3726	0	0.302707	Primary	OA	WHO II	Female	<=41	Yes	Yes	Wildtype	Non-codel
CGGA_1520	0.813699	1	0.135304	Recurrent	rGBM	WHO IV	Female	>41	Yes	Yes	Wildtype	Non-codel
CGGA_871	9.15068	0	0.256533	Primary	O	WHO II	Male	<=41	Yes	No	Mutant	Codel
CGGA_818	9.32055	0	0.90502	Primary	A	WHO II	Male	>41	Yes	No	Mutant	Non-codel
CGGA_1557	4.72055	0	0.0936741	Primary	AOA	WHO III	Male	>41	Yes	Yes	Mutant	Codel
CGGA_1606	1.29041	1	0.338668	Primary	AOA	WHO III	Female	<=41	Yes	Yes	Wildtype	Non-codel
CGGA_1407	5.52329	0	0.0936741	Primary	AO	WHO III	Female	<=41	No	Yes	Mutant	Codel
CGGA_890	8.16986	1	0.0936741	Primary	AA	WHO III	Male	<=41	Yes	Yes	Mutant	Non-codel
CGGA_1659	1.06027	1	0.240654	Recurrent	rGBM	WHO IV	Male	<=41	Yes	Yes	Wildtype	Non-codel
CGGA_763	0.873973	0	0.0936741	Recurrent	rAOA	WHO III	Male	>41	Yes	No	Wildtype	Non-codel
CGGA_1263	2.11507	1	2.33764	Primary	AA	WHO III	Male	>41	Yes	No	Wildtype	Non-codel
CGGA_1720	3.53425	0	0.148912	Primary	OA	WHO II	Male	<=41	Yes	Yes	Mutant	Non-codel
CGGA_759	3.46027	1	-0.207534	Primary	GBM	WHO IV	Male	<=41	Yes	Yes	Mutant	Non-codel
CGGA_D29	8.68767	0	-0.207534	Primary	O	WHO II	Male	<=41	Yes	No	Mutant	Codel
CGGA_545	1.52055	1	0.453896	Recurrent	rGBM	WHO IV	Female	<=41	Yes	Yes	Mutant	Non-codel
CGGA_761	5.0411	1	2.19099	Primary	GBM	WHO IV	Male	>41	Yes	No	Mutant	Non-codel
CGGA_1626	1.90685	1	3.80647	Primary	GBM	WHO IV	Male	>41	Yes	Yes	Wildtype	Non-codel
CGGA_1500	0.29589	1	2.21825	Primary	GBM	WHO IV	Female	>41	Yes	Yes	Wildtype	Non-codel
CGGA_1587	2.05479	1	0.0936741	Primary	AA	WHO III	Female	<=41	No	No	Mutant	Non-codel
CGGA_1369	0.986301	0	0.0936741	Primary	AO	WHO III	Female	<=41	Yes	Yes	Mutant	Non-codel
CGGA_815	6.07945	1	-0.207534	Primary	OA	WHO II	Female	>41	Yes	No	Mutant	Non-codel
CGGA_1459	1.43014	0	4.16053	Recurrent	rAOA	WHO III	Male	>41	Yes	Yes	Wildtype	Non-codel
CGGA_1680	1.63288	1	0.253285	Primary	AA	WHO III	Male	>41	Yes	Yes	Mutant	Non-codel
CGGA_1709	1.13699	1	3.53834	Primary	GBM	WHO IV	Male	>41	Yes	Yes	Wildtype	Non-codel
CGGA_1607	3.65205	1	0.396635	Recurrent	rOA	WHO II	Female	<=41	Yes	Yes	Mutant	Codel
CGGA_1065	7.34795	0	0.0936741	Primary	OA	WHO II	Female	>41	Yes	Yes	Mutant	Codel
CGGA_603	0.460274	0	-0.207534	Recurrent	rAA	WHO III	Male	<=41	Yes	Yes	Mutant	Non-codel
CGGA_1136	0.646575	1	2.9061	Secondary	sGBM	WHO IV	Female	<=41	No	Yes	Mutant	Non-codel
CGGA_1426	0.40274	1	3.61783	Primary	GBM	WHO IV	Female	>41	Yes	Yes	Wildtype	Non-codel
CGGA_607	3.80548	0	-0.207534	Primary	A	WHO II	Male	<=41	Yes	No	Mutant	Non-codel
CGGA_1008	0.863014	1	1.35178	Primary	GBM	WHO IV	Female	>41	Yes	Yes	Wildtype	Non-codel
CGGA_601	3.10411	1	0.861058	Primary	A	WHO II	Male	<=41	Yes	No	Mutant	Non-codel
CGGA_747	2.65753	1	-0.207534	Primary	GBM	WHO IV	Male	<=41	Yes	No	Mutant	Non-codel
CGGA_565	9.87671	0	0.679574	Primary	AOA	WHO III	Male	>41	Yes	Yes	Wildtype	Non-codel
CGGA_1184	0.427397	1	0.135304	Recurrent	rAOA	WHO III	Male	>41	Yes	Yes	Mutant	Non-codel
CGGA_1116	0.679452	1	-0.207534	Recurrent	rGBM	WHO IV	Female	>41	Yes	Yes	Mutant	Non-codel
CGGA_1786	3.09041	0	0.0936741	Recurrent	rAO	WHO III	Female	>41	Yes	Yes	Mutant	Codel
CGGA_1346	0.778082	1	1.12628	Secondary	sGBM	WHO IV	Female	>41	Yes	Yes	Wildtype	Non-codel
CGGA_1215	0.0794521	1	-0.207534	Recurrent	rAOA	WHO III	Male	<=41	Yes	Yes	Mutant	Non-codel
CGGA_1275	0.50137	1	0.539079	Primary	GBM	WHO IV	Male	>41	Yes	Yes	Wildtype	Non-codel
CGGA_1235	6.26575	0	0.0936741	Primary	AO	WHO III	Female	<=41	No	Yes	Mutant	Non-codel
CGGA_D26	0.720548	1	1.5852	Recurrent	rGBM	WHO IV	Male	>41	Yes	No	Wildtype	Non-codel
CGGA_1169	4.83562	1	0.0936741	Primary	AOA	WHO III	Male	<=41	Yes	Yes	Mutant	Non-codel
CGGA_P110	2.19178	1	0.188964	Primary	AO	WHO III	Female	>41	Yes	Yes	Wildtype	Non-codel
CGGA_1013	4.72603	1	-0.207534	Primary	A	WHO II	Female	<=41	Yes	Yes	Mutant	Non-codel
CGGA_J130	6.86849	0	-0.207534	Recurrent	rA	WHO II	Male	<=41	Yes	No	Wildtype	Non-codel
CGGA_1073	0.739726	1	0.575448	Primary	GBM	WHO IV	Female	>41	Yes	No	Wildtype	Non-codel
CGGA_846	8.19452	0	0.0936741	Recurrent	rA	WHO II	Female	<=41	No	Yes	Wildtype	Non-codel
CGGA_604	1.04384	1	1.68748	Primary	GBM	WHO IV	Male	>41	Yes	Yes	Wildtype	Non-codel
CGGA_1146	6.84384	0	0.769097	Primary	AA	WHO III	Male	<=41	Yes	Yes	Mutant	Non-codel
CGGA_P22	1.11233	1	0.567558	Primary	GBM	WHO IV	Male	>41	Yes	Yes	Wildtype	Non-codel
CGGA_1384	0.523288	1	-0.207534	Primary	GBM	WHO IV	Female	<=41	Yes	Yes	Mutant	Non-codel
CGGA_809	3.43014	1	0.0936741	Primary	A	WHO II	Male	<=41	Yes	Yes	Mutant	Non-codel
CGGA_1451	1.2	1	4.19846	Primary	GBM	WHO IV	Female	>41	Yes	Yes	Wildtype	Non-codel
CGGA_1701	2.93699	0	0.0936741	Primary	AOA	WHO III	Male	>41	Yes	Yes	Mutant	Codel
CGGA_1026	4.30137	1	0.737154	Primary	GBM	WHO IV	Male	>41	Yes	Yes	Wildtype	Non-codel
CGGA_1758	1.13425	1	4.8057	Primary	GBM	WHO IV	Female	>41	Yes	Yes	Wildtype	Non-codel
CGGA_1408	3.73151	1	2.6128	Primary	AOA	WHO III	Female	>41	Yes	Yes	Wildtype	Non-codel
CGGA_D47	2.87123	1	0.394313	Primary	OA	WHO II	Male	<=41	Yes	Yes	Mutant	Codel
CGGA_641	9.34521	1	-0.207534	Primary	AO	WHO III	Female	>41	Yes	Yes	Mutant	Codel
CGGA_707	9.03836	1	0.0936741	Primary	OA	WHO II	Female	<=41	Yes	Yes	Mutant	Codel
CGGA_1521	0.561644	1	0.982751	Primary	GBM	WHO IV	Female	>41	Yes	Yes	Wildtype	Non-codel
CGGA_1588	4.6	0	0.0936741	Primary	AOA	WHO III	Female	<=41	No	No	Wildtype	Non-codel
CGGA_698	5.07123	1	-0.207534	Primary	A	WHO II	Female	>41	Yes	Yes	Mutant	Non-codel
CGGA_703	3.71233	1	0.16239	Recurrent	rAO	WHO III	Female	<=41	Yes	Yes	Mutant	Non-codel
CGGA_1059	0.0575342	1	2.91185	Recurrent	rA	WHO II	Female	>41	Yes	No	Mutant	Non-codel
CGGA_643	0.906849	1	3.38934	Primary	AOA	WHO III	Male	>41	Yes	Yes	Wildtype	Non-codel
CGGA_1191	6.47945	0	0.148912	Primary	AOA	WHO III	Male	>41	No	No	Mutant	Codel
CGGA_1651	2.30685	1	0.0936741	Recurrent	rA	WHO II	Female	>41	Yes	Yes	Mutant	Non-codel
CGGA_1392	1.29589	1	2.28815	Primary	GBM	WHO IV	Male	>41	Yes	Yes	Wildtype	Non-codel
CGGA_1287	1.46027	1	-0.207534	Primary	GBM	WHO IV	Male	<=41	Yes	Yes	Mutant	Non-codel
CGGA_1608	4.46301	0	4.0614	Recurrent	rAA	WHO III	Male	<=41	Yes	No	Mutant	Non-codel
CGGA_659	2	0	0.548254	Primary	O	WHO II	Female	>41	Yes	Yes	Wildtype	Non-codel
CGGA_D59	7.61096	0	-0.207534	Secondary	sGBM	WHO IV	Female	<=41	Yes	Yes	Mutant	Non-codel
CGGA_1361	5.73151	0	0.0936741	Primary	O	WHO II	Male	<=41	Yes	Yes	Mutant	Non-codel
CGGA_663	9.53151	0	0.188964	Primary	A	WHO II	Female	<=41	Yes	No	Mutant	Non-codel
CGGA_1007	0.945205	1	-0.207534	Primary	GBM	WHO IV	Female	>41	Yes	Yes	Wildtype	Non-codel
CGGA_1563	4.70959	0	0.0936741	Primary	A	WHO II	Female	<=41	Yes	No	Wildtype	Non-codel
CGGA_P183	2.21096	0	0.0936741	Primary	AO	WHO III	Male	>41	Yes	Yes	Mutant	Codel
CGGA_D32	0.980822	1	2.76972	Recurrent	rGBM	WHO IV	Male	>41	No	Yes	Wildtype	Non-codel
CGGA_1702	0.460274	1	1.8337	Recurrent	rGBM	WHO IV	Female	<=41	Yes	Yes	Wildtype	Non-codel
CGGA_1452	1.28219	1	4.02559	Primary	GBM	WHO IV	Male	>41	Yes	Yes	Wildtype	Non-codel
CGGA_632	1.57808	1	-0.207534	Primary	OA	WHO II	Female	<=41	Yes	Yes	Mutant	Non-codel
CGGA_1809	0.939726	1	0.373734	Primary	AO	WHO III	Male	<=41	Yes	Yes	Wildtype	Non-codel
CGGA_D44	0.857534	1	1.49025	Primary	AOA	WHO III	Female	<=41	Yes	No	Wildtype	Non-codel
CGGA_1433	1.33425	1	0.240654	Primary	GBM	WHO IV	Female	>41	Yes	Yes	Wildtype	Non-codel
CGGA_704	7.04658	1	0.141268	Primary	OA	WHO II	Male	<=41	Yes	Yes	Mutant	Non-codel
CGGA_1814	0.605479	1	3.43978	Recurrent	rGBM	WHO IV	Female	>41	Yes	Yes	Wildtype	Non-codel
CGGA_1886	0.926027	1	0.350454	Recurrent	rGBM	WHO IV	Male	<=41	Yes	Yes	Wildtype	Non-codel
CGGA_1413	5.50137	0	0.0936741	Primary	AO	WHO III	Male	<=41	Yes	Yes	Mutant	Codel
CGGA_1820	0.210959	1	0.290513	Recurrent	rGBM	WHO IV	Female	>41	Yes	Yes	Wildtype	Non-codel
CGGA_1192	6.47397	0	0.0936741	Primary	OA	WHO II	Female	>41	Yes	Yes	Mutant	Non-codel
CGGA_1695	2.53973	0	0.253285	Recurrent	rAA	WHO III	Male	>41	Yes	Yes	Mutant	Non-codel
CGGA_1391	1.16712	1	0.516339	Primary	GBM	WHO IV	Male	>41	Yes	Yes	Wildtype	Non-codel
CGGA_1155	3.76164	1	0.202065	Primary	AA	WHO III	Male	>41	Yes	Yes	Mutant	Codel
CGGA_D56	0.175342	1	0.808097	Recurrent	rAOA	WHO III	Male	>41	Yes	No	Mutant	Non-codel
CGGA_1857	0.430137	1	1.87406	Recurrent	rGBM	WHO IV	Male	>41	Yes	Yes	Wildtype	Non-codel
CGGA_P19	3.27945	0	0.0936741	Primary	OA	WHO II	Male	<=41	Yes	No	Mutant	Non-codel
CGGA_580	3.81918	1	-0.0230786	Primary	OA	WHO II	Male	>41	Yes	No	Mutant	Non-codel
CGGA_1673	3.99178	0	0.0936741	Primary	OA	WHO II	Female	<=41	No	No	Mutant	Non-codel
CGGA_1362	5.73151	0	0.202065	Primary	AA	WHO III	Female	>41	Yes	Yes	Wildtype	Non-codel
CGGA_1613	0.684932	0	3.17723	Primary	GBM	WHO IV	Male	>41	Yes	Yes	Wildtype	Non-codel
CGGA_1575	0.353425	1	0.227908	Recurrent	rAOA	WHO III	Male	<=41	Yes	No	Mutant	Non-codel
CGGA_1161	6.74795	0	0.227908	Primary	AOA	WHO III	Male	<=41	Yes	No	Mutant	Non-codel
CGGA_1280	1.22466	1	1.71307	Primary	AA	WHO III	Male	>41	Yes	Yes	Wildtype	Non-codel
CGGA_807	9.35616	0	-0.207534	Primary	A	WHO II	Male	>41	Yes	Yes	Wildtype	Non-codel
CGGA_1463	4.46575	0	0.0936741	Primary	O	WHO II	Female	>41	Yes	No	Mutant	Codel
CGGA_502	10.3589	0	-0.207534	Primary	A	WHO II	Male	<=41	Yes	No	Mutant	Non-codel
CGGA_1621	4.40274	0	0.0936741	Primary	OA	WHO II	Female	>41	No	No	Mutant	Non-codel
CGGA_1688	0.139726	1	0.188964	Recurrent	rAA	WHO III	Female	>41	Yes	Yes	Wildtype	Non-codel
CGGA_488	1.19178	1	4.17636	Primary	AOA	WHO III	Male	<=41	Yes	Yes	Wildtype	Non-codel
CGGA_525	0.378082	1	0.671166	Primary	GBM	WHO IV	Male	>41	Yes	No	Wildtype	Non-codel
CGGA_1087	1.92055	0	0.0936741	Primary	OA	WHO II	Female	<=41	No	Yes	Mutant	Codel
CGGA_P103	2.69315	0	0.0936741	Primary	OA	WHO II	Male	<=41	Yes	No	Mutant	Codel
CGGA_1543	1.98082	1	3.10606	Primary	GBM	WHO IV	Male	>41	Yes	No	Mutant	Non-codel
CGGA_1565	3.88219	0	0.0936741	Primary	AOA	WHO III	Female	<=41	No	No	Mutant	Non-codel
CGGA_1142	2.75342	1	0.41917	Primary	GBM	WHO IV	Male	>41	Yes	Yes	Wildtype	Non-codel
CGGA_P185	1.37534	1	0.0936741	Recurrent	rAA	WHO III	Female	<=41	Yes	Yes	Mutant	Non-codel
CGGA_1171	1.12877	1	2.346	Primary	GBM	WHO IV	Male	<=41	Yes	Yes	Wildtype	Non-codel
CGGA_1111	7.07397	0	1.87406	Primary	AOA	WHO III	Male	>41	Yes	Yes	Mutant	Non-codel
CGGA_1728	2.51233	1	0.0936741	Primary	GBM	WHO IV	Male	>41	Yes	Yes	Mutant	Non-codel
CGGA_1663	0.794521	1	0.148912	Recurrent	rGBM	WHO IV	Male	>41	Yes	Yes	Wildtype	Non-codel
CGGA_1645	4.20274	0	0.148912	Primary	AA	WHO III	Male	>41	Yes	Yes	Mutant	Non-codel
CGGA_1488	5.15616	0	0.0936741	Primary	OA	WHO II	Male	<=41	No	No	Mutant	Non-codel
CGGA_D15	8.7589	0	-0.207534	Primary	OA	WHO II	Female	<=41	Yes	No	Mutant	Codel
CGGA_669	1.66301	1	-0.177647	Recurrent	rGBM	WHO IV	Female	>41	Yes	Yes	Wildtype	Codel
CGGA_727	2.80274	1	1.30819	Primary	AA	WHO III	Male	>41	Yes	Yes	Wildtype	Non-codel
CGGA_D51	0.369863	1	0.712745	Recurrent	rGBM	WHO IV	Female	>41	Yes	No	Wildtype	Non-codel
CGGA_1332	1.39726	0	3.54779	Primary	GBM	WHO IV	Female	>41	No	Yes	Wildtype	Non-codel
CGGA_721	6.99178	1	0.0936741	Primary	OA	WHO II	Male	>41	Yes	Yes	Mutant	Non-codel
CGGA_1131	6.93973	0	0.0936741	Primary	AOA	WHO III	Female	>41	Yes	Yes	Mutant	Non-codel
CGGA_1226	1.83562	1	0.921507	Primary	A	WHO II	Female	<=41	Yes	Yes	Wildtype	Non-codel
CGGA_1508	2.87397	1	0.0936741	Primary	AOA	WHO III	Male	<=41	No	No	Mutant	Non-codel
CGGA_D57	2.09863	1	1.61256	Primary	GBM	WHO IV	Male	<=41	Yes	Yes	Wildtype	Non-codel
CGGA_P31	3.30137	0	0.0936741	Primary	A	WHO II	Male	>41	No	Yes	Wildtype	Non-codel
CGGA_1353	2.8	1	3.7769	Primary	GBM	WHO IV	Male	>41	Yes	Yes	Wildtype	Non-codel
CGGA_804	1.68219	0	-0.207534	Primary	GBM	WHO IV	Female	>41	Yes	Yes	Wildtype	Non-codel
CGGA_1475	0.49863	1	-0.14834	Secondary	sGBM	WHO IV	Male	<=41	No	No	Mutant	Non-codel
CGGA_1415	5.49863	0	0.188964	Recurrent	rGBM	WHO IV	Female	<=41	Yes	Yes	Wildtype	Non-codel
CGGA_194	6.31233	1	0.0936741	Recurrent	rAO	WHO III	Female	>41	Yes	No	Mutant	Codel
CGGA_1850	2.05479	0	0.0936741	Primary	OA	WHO II	Male	<=41	No	Yes	Mutant	Non-codel
CGGA_1435	0.887671	0	0.215046	Primary	AOA	WHO III	Female	>41	Yes	No	Mutant	Non-codel
CGGA_D46	0.821918	1	1.54321	Recurrent	rAA	WHO III	Female	<=41	No	Yes	Mutant	Non-codel
CGGA_1615	1.60548	1	1.50812	Recurrent	rGBM	WHO IV	Male	>41	Yes	Yes	Wildtype	Codel
CGGA_P13	3.31781	0	0.0936741	Primary	OA	WHO II	Female	<=41	No	No	Mutant	Codel
CGGA_1172	6.6137	0	0.175739	Primary	GBM	WHO IV	Female	<=41	Yes	Yes	Mutant	Non-codel
CGGA_323	11.0219	0	0.575448	Primary	O	WHO II	Female	>41	No	No	Wildtype	Non-codel
CGGA_1311	2.9589	1	0.0936741	Recurrent	rAOA	WHO III	Female	<=41	Yes	Yes	Mutant	Codel
CGGA_1675	2.68493	0	0.0936741	Primary	AA	WHO III	Male	<=41	Yes	Yes	Mutant	Non-codel
CGGA_1371	5.69589	0	2.97763	Primary	GBM	WHO IV	Male	>41	Yes	Yes	Wildtype	Non-codel
CGGA_1513	5.00548	0	0.121564	Recurrent	rAOA	WHO III	Female	<=41	Yes	Yes	Mutant	Codel
CGGA_1342	6.42466	0	0.539079	Primary	GBM	WHO IV	Male	>41	Yes	Yes	Wildtype	Non-codel
CGGA_D35	1.81096	1	1.88471	Primary	GBM	WHO IV	Female	>41	Yes	No	Wildtype	Non-codel
CGGA_635	9.94795	0	-0.207534	Primary	OA	WHO II	Male	>41	Yes	Yes	Mutant	Codel
CGGA_666	6.84658	1	-0.207534	Primary	OA	WHO II	Female	>41	Yes	No	Mutant	Codel
CGGA_724	9.33151	0	0.0936741	Recurrent	rOA	WHO II	Male	<=41	No	No	Mutant	Non-codel
CGGA_P17	3.29589	0	0.0936741	Primary	AOA	WHO III	Male	<=41	Yes	Yes	Mutant	Codel
CGGA_1533	3.33425	1	0.121564	Recurrent	rAOA	WHO III	Female	>41	Yes	Yes	Wildtype	Non-codel
CGGA_1132	6.93973	0	0.0936741	Recurrent	rAOA	WHO III	Female	<=41	Yes	Yes	Mutant	Codel
CGGA_1552	4.73425	0	0.0936741	Primary	AOA	WHO III	Male	<=41	Yes	Yes	Mutant	Codel
CGGA_1119	1.15616	1	0.662711	Recurrent	rGBM	WHO IV	Male	>41	Yes	Yes	Mutant	Codel
CGGA_P147	2.36438	1	0.0936741	Primary	OA	WHO II	Male	>41	Yes	No	Mutant	Non-codel
CGGA_1251	0.745205	1	0.0422664	Primary	GBM	WHO IV	Female	>41	Yes	Yes	Wildtype	Non-codel
CGGA_859	1.06027	1	3.19969	Primary	GBM	WHO IV	Male	>41	Yes	No	Wildtype	Non-codel
CGGA_1687	3.87397	0	0.537051	Primary	GBM	WHO IV	Male	<=41	Yes	Yes	Wildtype	Non-codel
CGGA_863	5.67945	1	0.0936741	Primary	A	WHO II	Female	>41	Yes	No	Wildtype	Non-codel
CGGA_D21	3.30959	1	-0.207534	Primary	AA	WHO III	Female	<=41	Yes	No	Mutant	Non-codel
CGGA_757	2.86849	1	-0.207534	Primary	A	WHO II	Male	>41	Yes	Yes	Mutant	Non-codel
CGGA_621	3.69041	0	0.148912	Recurrent	rAOA	WHO III	Male	<=41	Yes	Yes	Mutant	Non-codel
CGGA_1429	5.4137	0	0.148912	Recurrent	rGBM	WHO IV	Female	<=41	Yes	Yes	Mutant	Codel
CGGA_1882	2.30685	0	0.0936741	Primary	AOA	WHO III	Male	<=41	No	No	Mutant	Codel
CGGA_1526	4.92603	0	0.0936741	Primary	AOA	WHO III	Male	<=41	Yes	Yes	Mutant	Codel
CGGA_D27	8.70685	0	0.373918	Recurrent	rAOA	WHO III	Male	<=41	Yes	Yes	Mutant	Codel
CGGA_1208	0.441096	1	2.30583	Recurrent	rGBM	WHO IV	Male	<=41	Yes	Yes	Wildtype	Non-codel
CGGA_1139	3.27671	1	0.434295	Primary	GBM	WHO IV	Female	>41	Yes	Yes	Wildtype	Non-codel
CGGA_715	9.39452	0	-0.207534	Primary	O	WHO II	Male	>41	Yes	No	Mutant	Codel
CGGA_861	2.44658	1	0.0936741	Primary	AOA	WHO III	Male	<=41	No	No	Wildtype	Non-codel
CGGA_1559	1.65205	1	0.0936741	Primary	GBM	WHO IV	Male	>41	No	Yes	Mutant	Codel
CGGA_867	1.00548	1	0.982751	Recurrent	rAA	WHO III	Female	<=41	No	No	Mutant	Non-codel
CGGA_1706	3.73699	0	1.5538	Primary	GBM	WHO IV	Male	>41	Yes	Yes	Wildtype	Non-codel
CGGA_1487	1.42466	1	0.0936741	Recurrent	rAA	WHO III	Female	>41	Yes	Yes	Wildtype	Non-codel
CGGA_1750	0.684932	1	0.0936741	Primary	GBM	WHO IV	Female	>41	Yes	Yes	Wildtype	Non-codel
CGGA_1727	3.49589	0	0.135304	Primary	GBM	WHO IV	Male	>41	Yes	Yes	Mutant	Non-codel
CGGA_843	9.26027	0	-0.207534	Primary	OA	WHO II	Male	<=41	Yes	No	Mutant	Codel
CGGA_108	1.00274	1	0.865643	Recurrent	rAA	WHO III	Male	>41	Yes	Yes	Wildtype	Non-codel
CGGA_578	0.991781	1	-0.0500299	Primary	AOA	WHO III	Female	>41	Yes	Yes	Wildtype	Non-codel
CGGA_812	9.34247	0	-0.207534	Primary	O	WHO II	Male	<=41	Yes	No	Mutant	Codel
CGGA_120	0.789041	1	0.737907	Recurrent	rGBM	WHO IV	Male	>41	Yes	Yes	Wildtype	Non-codel
CGGA_1045	0.953425	1	2.57507	Primary	GBM	WHO IV	Male	>41	Yes	Yes	Wildtype	Non-codel
CGGA_1656	0.408219	1	3.62128	Recurrent	rGBM	WHO IV	Male	>41	Yes	Yes	Wildtype	Non-codel
CGGA_1580	4.33151	1	0.121564	Primary	AA	WHO III	Female	<=41	Yes	Yes	Mutant	Non-codel
CGGA_P160	0.6	1	3.1242	Primary	GBM	WHO IV	Female	>41	Yes	Yes	Wildtype	Non-codel
CGGA_431	10.5918	0	-0.207534	Recurrent	rAOA	WHO III	Male	<=41	Yes	Yes	Mutant	Codel
CGGA_1507	1.9589	1	3.24797	Recurrent	rGBM	WHO IV	Female	<=41	Yes	Yes	Wildtype	Non-codel
CGGA_P177	2.12603	0	0.0936741	Primary	OA	WHO II	Male	>41	Yes	No	Wildtype	Non-codel
CGGA_1295	0.849315	1	0.188964	Recurrent	rAOA	WHO III	Male	<=41	Yes	Yes	Mutant	Non-codel
CGGA_1319	5.88767	0	0.278213	Primary	AO	WHO III	Female	>41	Yes	Yes	Wildtype	Non-codel
CGGA_D24	2.29315	1	-0.207534	Primary	AOA	WHO III	Female	<=41	Yes	No	Mutant	Non-codel
CGGA_766	9.51233	0	-0.207534	Primary	OA	WHO II	Male	<=41	Yes	No	Mutant	Codel
CGGA_1022	8.94521	0	2.41127	Recurrent	rA	WHO II	Female	>41	No	Yes	Wildtype	Non-codel
CGGA_P137	2.35616	0	0.0936741	Primary	A	WHO II	Male	>41	Yes	Yes	Mutant	Non-codel
CGGA_1339	5.80822	0	0.0936741	Primary	O	WHO II	Male	<=41	No	Yes	Mutant	Codel
CGGA_369	10.8411	0	0.0936741	Recurrent	rA	WHO II	Male	<=41	Yes	No	Mutant	Non-codel
CGGA_1273	5.23836	0	0.135304	Recurrent	rAOA	WHO III	Male	>41	Yes	Yes	Mutant	Non-codel
CGGA_864	9.1863	0	-0.207534	Primary	OA	WHO II	Male	<=41	Yes	No	Mutant	Codel
CGGA_1764	1.94521	1	0.0936741	Primary	GBM	WHO IV	Male	<=41	Yes	Yes	Mutant	Non-codel
CGGA_413	0.50137	0	-0.0500299	Primary	GBM	WHO IV	Male	>41	Yes	Yes	Wildtype	Non-codel
CGGA_1035	1.55342	1	3.06435	Primary	GBM	WHO IV	Female	>41	Yes	Yes	Wildtype	Non-codel
CGGA_272	0.652055	1	3.17422	Secondary	sGBM	WHO IV	Male	>41	Yes	No	Wildtype	Non-codel
CGGA_1075	1.9726	0	1.72301	Primary	GBM	WHO IV	Male	>41	Yes	Yes	Wildtype	Non-codel
CGGA_1015	0.449315	1	1.14487	Primary	GBM	WHO IV	Male	>41	Yes	No	Wildtype	Non-codel
CGGA_P84	2.81096	0	0.290513	Primary	A	WHO II	Female	<=41	Yes	No	Mutant	Non-codel
CGGA_1460	0.572603	1	3.56772	Secondary	sGBM	WHO IV	Male	>41	Yes	Yes	Wildtype	Non-codel
CGGA_1283	0.0547945	1	-0.207534	Secondary	sGBM	WHO IV	Male	<=41	Yes	Yes	Wildtype	Non-codel
CGGA_261	11.3151	0	-0.207534	Primary	A	WHO II	Male	<=41	Yes	No	Mutant	Non-codel
CGGA_267	3.76438	1	-0.207534	Primary	A	WHO II	Male	<=41	No	No	Mutant	Non-codel
CGGA_1048	1.92603	0	0.0936741	Primary	OA	WHO II	Female	<=41	No	Yes	Wildtype	Non-codel
CGGA_1811	0.832877	1	0.0936741	Recurrent	rGBM	WHO IV	Male	>41	Yes	Yes	Wildtype	Non-codel
CGGA_358	0.334247	1	0.0936741	Recurrent	rAOA	WHO III	Female	<=41	No	No	Mutant	Non-codel
CGGA_685	8.87397	1	-0.207534	Primary	A	WHO II	Female	<=41	Yes	Yes	Mutant	Non-codel
CGGA_1567	2.30137	1	0.265804	Primary	AO	WHO III	Female	>41	Yes	Yes	Mutant	Non-codel
CGGA_1749	1.09863	1	1.87406	Primary	GBM	WHO IV	Female	>41	Yes	Yes	Wildtype	Non-codel
CGGA_1389	3.75342	1	0.135304	Primary	AOA	WHO III	Female	>41	Yes	No	Mutant	Codel
CGGA_1003	8.45753	0	0.0936741	Primary	OA	WHO II	Female	>41	No	Yes	Mutant	Codel
CGGA_904	2.12055	1	-0.207534	Primary	A	WHO II	Male	<=41	Yes	No	Mutant	Non-codel
CGGA_247	1.66849	1	0.363616	Primary	AA	WHO III	Male	>41	Yes	Yes	Mutant	Non-codel
CGGA_1660	1.1863	0	1.44481	Primary	OA	WHO II	Male	<=41	Yes	Yes	Wildtype	Codel
CGGA_P156	2.25205	0	0.0936741	Primary	O	WHO II	Male	<=41	No	No	Mutant	Codel
CGGA_1394	0.380822	1	-0.207534	Recurrent	rGBM	WHO IV	Male	<=41	Yes	Yes	Mutant	Non-codel
CGGA_241	11.4055	0	-0.207534	Primary	OA	WHO II	Male	<=41	Yes	No	Mutant	Non-codel
CGGA_P439	0.846575	0	0.0936741	Recurrent	rA	WHO II	Male	>41	Yes	Yes	Mutant	Non-codel
CGGA_796	1.53151	0	-0.207534	Primary	A	WHO II	Male	>41	Yes	Yes	Wildtype	Non-codel
CGGA_492	1.7863	0	0.148912	Recurrent	rAOA	WHO III	Male	<=41	Yes	Yes	Wildtype	Non-codel
CGGA_J042	3.86027	1	-0.207534	Recurrent	rOA	WHO II	Male	<=41	No	No	Mutant	Non-codel
CGGA_243	8.15616	0	-0.207534	Primary	OA	WHO II	Female	<=41	Yes	No	Mutant	Codel
CGGA_1164	2.8	1	0.188964	Recurrent	rGBM	WHO IV	Female	<=41	No	Yes	Mutant	Codel
CGGA_256	0.432877	0	-0.0774713	Primary	A	WHO II	Male	<=41	Yes	Yes	Mutant	Non-codel
CGGA_1106	1.15068	1	3.80243	Primary	GBM	WHO IV	Male	<=41	Yes	Yes	Wildtype	Non-codel
CGGA_P87	0.657534	1	1.09779	Recurrent	rGBM	WHO IV	Male	<=41	Yes	Yes	Mutant	Non-codel
CGGA_1454	5.33151	0	0.0936741	Primary	OA	WHO II	Female	>41	Yes	No	Wildtype	Non-codel
CGGA_1597	0.476712	1	0.215046	Primary	GBM	WHO IV	Male	>41	Yes	Yes	Wildtype	Non-codel
CGGA_1704	3.72603	0	0.0936741	Primary	A	WHO II	Female	<=41	Yes	No	Wildtype	Non-codel
CGGA_1078	0.863014	1	2.26902	Recurrent	rGBM	WHO IV	Female	>41	Yes	Yes	Wildtype	Non-codel
CGGA_1018	6.92329	1	0.0936741	Recurrent	rO	WHO II	Male	>41	Yes	Yes	Mutant	Codel
CGGA_1739	1.41096	1	0.227908	Recurrent	rAOA	WHO III	Male	>41	Yes	Yes	Mutant	Non-codel
CGGA_1524	3.3589	0	0.0936741	Recurrent	rAOA	WHO III	Male	<=41	Yes	Yes	Mutant	Codel
CGGA_P83	2.82192	0	0.0936741	Primary	A	WHO II	Female	<=41	Yes	Yes	Mutant	Non-codel
CGGA_D28	2.35616	1	0.0936741	Primary	AA	WHO III	Male	<=41	Yes	No	Mutant	Non-codel
CGGA_1189	7.12877	0	-0.207534	Primary	AOA	WHO III	Female	<=41	Yes	Yes	Mutant	Codel
CGGA_848	0.558904	0	2.07915	Primary	GBM	WHO IV	Female	>41	Yes	No	Wildtype	Non-codel
CGGA_103	3.25479	1	0.148912	Primary	AA	WHO III	Male	>41	Yes	No	Mutant	Non-codel
CGGA_1510	1.27397	1	0.16239	Recurrent	rAOA	WHO III	Male	<=41	Yes	Yes	Mutant	Non-codel
CGGA_893	8.65753	1	-0.207534	Primary	OA	WHO II	Female	<=41	Yes	No	Mutant	Non-codel
CGGA_760	9.53151	0	-0.207534	Primary	O	WHO II	Female	<=41	Yes	No	Mutant	Codel
CGGA_1437	2.8411	1	0.0936741	Recurrent	rAOA	WHO III	Male	>41	Yes	Yes	Wildtype	Non-codel
CGGA_799	5.11781	1	0.0936741	Recurrent	rAOA	WHO III	Male	>41	Yes	Yes	Mutant	Codel
CGGA_903	3.9863	1	0.135304	Primary	AOA	WHO III	Female	<=41	Yes	No	Mutant	Non-codel
CGGA_107	5.90685	1	3.52362	Recurrent	rAA	WHO III	Female	<=41	No	No	Wildtype	Non-codel
CGGA_1690	1.62192	1	4.01258	Primary	GBM	WHO IV	Male	>41	Yes	Yes	Wildtype	Non-codel
CGGA_1417	5.48219	0	0.0936741	Primary	AOA	WHO III	Male	>41	Yes	Yes	Mutant	Codel
CGGA_850	1.54521	0	2.72714	Primary	GBM	WHO IV	Female	>41	No	No	Wildtype	Non-codel
CGGA_1603	0.975342	1	0.175739	Recurrent	rGBM	WHO IV	Male	<=41	Yes	Yes	Wildtype	Non-codel
CGGA_1505	0.471233	1	1.39539	Recurrent	rGBM	WHO IV	Male	<=41	Yes	Yes	Mutant	Non-codel
CGGA_882	2.76164	0	0.16239	Recurrent	rAOA	WHO III	Male	<=41	Yes	No	Mutant	Non-codel
CGGA_42	7.7589	1	0.0936741	Primary	A	WHO II	Male	<=41	Yes	Yes	Mutant	Codel
CGGA_P121	2.57808	0	0.0936741	Primary	OA	WHO II	Male	<=41	Yes	No	Wildtype	Non-codel
CGGA_1725	3.51233	0	0.0936741	Primary	AOA	WHO III	Female	<=41	Yes	Yes	Mutant	Codel
CGGA_1240	0.0520548	1	-0.207534	Primary	GBM	WHO IV	Male	<=41	No	No	Wildtype	Non-codel
CGGA_P411	1.12603	0	3.77484	Recurrent	rGBM	WHO IV	Female	>41	Yes	Yes	Mutant	Non-codel
CGGA_P5	1.03562	1	0.0936741	Recurrent	rAA	WHO III	Female	>41	Yes	Yes	Mutant	Non-codel
CGGA_785	9.47123	0	-0.207534	Primary	O	WHO II	Male	>41	Yes	No	Mutant	Codel
CGGA_1403	1.86027	1	2.99389	Primary	GBM	WHO IV	Female	>41	Yes	Yes	Wildtype	Non-codel
CGGA_P18	1.06027	1	0.0936741	Primary	AA	WHO III	Male	<=41	No	Yes	Mutant	Non-codel
CGGA_300	6.02466	1	-0.207534	Primary	A	WHO II	Female	<=41	Yes	Yes	Mutant	Non-codel
CGGA_1819	2.76164	0	1.42306	Primary	GBM	WHO IV	Male	>41	Yes	Yes	Wildtype	Non-codel
CGGA_1060	0.621918	1	1.87335	Recurrent	rGBM	WHO IV	Male	>41	No	Yes	Mutant	Non-codel
CGGA_P145	0.843836	1	0.0936741	Primary	OA	WHO II	Male	>41	Yes	No	Mutant	Non-codel
CGGA_P163	2.41096	0	0.227908	Recurrent	rAO	WHO III	Female	>41	Yes	Yes	Mutant	Non-codel
CGGA_P315	1.23562	1	0.326783	Recurrent	rOA	WHO II	Female	>41	Yes	No	Mutant	Non-codel
CGGA_1685	0.616438	1	0.0936741	Recurrent	rAA	WHO III	Male	<=41	Yes	Yes	Mutant	Non-codel
CGGA_1381	0.126027	1	1.56668	Recurrent	rGBM	WHO IV	Female	<=41	Yes	Yes	Mutant	Non-codel
CGGA_1077	1.61918	1	2.20632	Primary	GBM	WHO IV	Male	>41	Yes	No	Wildtype	Non-codel
CGGA_1017	2.10411	1	0.0936741	Primary	GBM	WHO IV	Female	<=41	Yes	No	Wildtype	Non-codel
CGGA_112	4.20274	1	0.0936741	Primary	OA	WHO II	Male	<=41	Yes	Yes	Mutant	Non-codel
CGGA_487	0.427397	1	2.82418	Recurrent	rGBM	WHO IV	Male	>41	Yes	Yes	Wildtype	Non-codel
CGGA_1598	1.54521	1	2.75991	Primary	AOA	WHO III	Male	<=41	Yes	Yes	Wildtype	Non-codel
CGGA_P122	2.66027	0	0.0936741	Recurrent	rOA	WHO II	Male	>41	Yes	Yes	Mutant	Codel
CGGA_1866	0.347945	1	2.26423	Primary	GBM	WHO IV	Male	>41	Yes	Yes	Wildtype	Non-codel
CGGA_1618	4.42466	0	0.0936741	Primary	AOA	WHO III	Male	<=41	Yes	Yes	Mutant	Non-codel
CGGA_1270	0.515068	1	-0.207534	Primary	GBM	WHO IV	Female	>41	Yes	Yes	Wildtype	Non-codel
CGGA_808	3.19726	0	-0.207534	Primary	GBM	WHO IV	Male	<=41	Yes	Yes	Wildtype	Non-codel
CGGA_483	0.758904	1	0.645657	Primary	GBM	WHO IV	Female	>41	Yes	Yes	Wildtype	Non-codel
CGGA_P269	1.4	1	0.952462	Recurrent	rAO	WHO III	Female	>41	Yes	Yes	Wildtype	Codel
CGGA_1731	2.66301	0	0.175739	Primary	AOA	WHO III	Female	>41	Yes	Yes	Mutant	Non-codel
CGGA_658	1.01918	1	1.36781	Primary	GBM	WHO IV	Male	>41	Yes	No	Wildtype	Non-codel
CGGA_1224	0.742466	1	1.94027	Primary	GBM	WHO IV	Male	>41	Yes	Yes	Wildtype	Non-codel
CGGA_D58	0.49589	1	-0.207534	Recurrent	rAA	WHO III	Male	<=41	No	No	Wildtype	Codel
CGGA_675	9.80548	0	-0.207534	Primary	OA	WHO II	Female	<=41	Yes	No	Mutant	Codel
CGGA_2003	1.41644	0	1.46091	Recurrent	rGBM	WHO IV	Male	<=41	Yes	Yes	Mutant	Non-codel
CGGA_D40	8.45205	0	0.897781	Recurrent	rOA	WHO II	Male	>41	No	No	Mutant	Non-codel
CGGA_1478	1.48493	1	2.21825	Primary	GBM	WHO IV	Female	>41	Yes	Yes	Wildtype	Non-codel
CGGA_700	0.465753	0	-0.207534	Primary	GBM	WHO IV	Female	<=41	Yes	Yes	Mutant	Non-codel
CGGA_1181	0.871233	0	0.202065	Primary	OA	WHO II	Male	<=41	Yes	Yes	Mutant	Non-codel
CGGA_1771	2.92603	1	0.0936741	Recurrent	rAOA	WHO III	Male	<=41	Yes	Yes	Mutant	Non-codel
CGGA_1382	0.778082	1	3.02234	Primary	GBM	WHO IV	Male	>41	Yes	Yes	Wildtype	Non-codel
CGGA_1260	0.484932	1	0.849266	Recurrent	rGBM	WHO IV	Male	<=41	Yes	Yes	Wildtype	Non-codel
CGGA_782	0.791781	1	2.79057	Primary	GBM	WHO IV	Male	>41	Yes	No	Wildtype	Non-codel
CGGA_1723	3.51233	0	0.148912	Primary	AOA	WHO III	Female	<=41	Yes	Yes	Mutant	Codel
CGGA_694	3.27123	1	-0.207534	Recurrent	rA	WHO II	Male	<=41	Yes	Yes	Mutant	Non-codel
CGGA_1548	2.88767	1	3.70504	Primary	GBM	WHO IV	Male	>41	Yes	Yes	Wildtype	Non-codel
CGGA_320	8.23288	1	0.0936741	Primary	OA	WHO II	Male	<=41	Yes	Yes	Mutant	Codel
CGGA_1301	0.654795	1	-0.0230786	Secondary	sGBM	WHO IV	Male	>41	Yes	Yes	Wildtype	Non-codel
CGGA_1605	0.879452	1	0.0936741	Recurrent	rGBM	WHO IV	Male	<=41	Yes	Yes	Wildtype	Non-codel
CGGA_P143	0.715068	1	3.59457	Primary	GBM	WHO IV	Female	>41	Yes	Yes	Wildtype	Non-codel
CGGA_135	5.27123	1	0.302707	Primary	AA	WHO III	Female	<=41	Yes	No	Wildtype	Non-codel
CGGA_P108	2.67397	0	0.215046	Primary	AOA	WHO III	Female	<=41	Yes	Yes	Wildtype	Non-codel
CGGA_1899	0.482192	1	2.78722	Recurrent	rGBM	WHO IV	Male	>41	Yes	Yes	Wildtype	Non-codel
CGGA_P279	1.83014	0	0.0936741	Recurrent	rAO	WHO III	Female	>41	Yes	Yes	Mutant	Codel
CGGA_P151	2.50685	0	0.148912	Primary	OA	WHO II	Female	>41	Yes	Yes	Mutant	Non-codel
CGGA_1097	3.77534	1	2.08089	Primary	OA	WHO II	Male	<=41	Yes	Yes	Wildtype	Non-codel
CGGA_P30	1.10685	1	2.63814	Primary	A	WHO II	Male	>41	Yes	Yes	Wildtype	Non-codel
CGGA_1518	1.12603	1	0.0936741	Primary	AOA	WHO III	Female	<=41	Yes	Yes	Wildtype	Non-codel
CGGA_720	3.44658	1	0.0936741	Recurrent	rA	WHO II	Female	>41	Yes	No	Mutant	Non-codel
CGGA_1908	0.816438	1	4.5513	Recurrent	rGBM	WHO IV	Female	>41	Yes	Yes	Wildtype	Non-codel
CGGA_D50	2.14247	1	0.0936741	Recurrent	rOA	WHO II	Male	<=41	No	No	Mutant	Codel
CGGA_1024	8.42192	1	1.10112	Primary	GBM	WHO IV	Male	>41	Yes	Yes	Wildtype	Non-codel
CGGA_D48	0.605479	1	0.414436	Recurrent	rAOA	WHO III	Female	<=41	Yes	No	Mutant	Non-codel
CGGA_1158	6.76986	0	0.0936741	Primary	OA	WHO II	Male	<=41	Yes	Yes	Mutant	Codel
CGGA_1698	1.06301	1	3.36864	Primary	GBM	WHO IV	Female	>41	No	No	Wildtype	Non-codel
CGGA_1538	0.676712	1	3.44109	Recurrent	rGBM	WHO IV	Female	>41	Yes	Yes	Wildtype	Non-codel
CGGA_P113	2.8274	0	0.135304	Primary	OA	WHO II	Male	<=41	Yes	No	Wildtype	Non-codel
CGGA_P173	2.14247	0	0.0936741	Primary	OA	WHO II	Male	<=41	Yes	No	Mutant	Non-codel
CGGA_1070	0.912329	1	3.64606	Primary	GBM	WHO IV	Male	<=41	Yes	No	Wildtype	Non-codel
CGGA_1237	0.810959	1	2.93836	Primary	GBM	WHO IV	Male	>41	Yes	Yes	Wildtype	Non-codel
CGGA_1030	8.03836	0	0.0936741	Primary	OA	WHO II	Female	<=41	Yes	Yes	Mutant	Non-codel
CGGA_P308	1.54247	1	0.0936741	Recurrent	rAA	WHO III	Male	<=41	Yes	Yes	Mutant	Non-codel
CGGA_28	3.02192	1	0.265804	Primary	A	WHO II	Male	<=41	Yes	No	Mutant	Codel
CGGA_1667	4.04384	0	0.0936741	Primary	AO	WHO III	Female	<=41	Yes	Yes	Mutant	Codel
CGGA_1005	9.00274	0	-0.207534	Primary	A	WHO II	Female	<=41	Yes	No	Mutant	Non-codel
CGGA_269	8.03288	0	-0.207534	Primary	A	WHO II	Female	>41	Yes	No	Wildtype	Non-codel
CGGA_1769	3.15342	0	0.0936741	Primary	GBM	WHO IV	Female	>41	Yes	Yes	Wildtype	Non-codel
CGGA_530	1.3863	1	2.46094	Recurrent	rGBM	WHO IV	Female	<=41	No	Yes	Wildtype	Non-codel
CGGA_1862	0.30137	1	3.10772	Primary	AA	WHO III	Male	<=41	Yes	Yes	Wildtype	Non-codel
CGGA_1320	0.161644	1	-0.105421	Primary	GBM	WHO IV	Male	<=41	No	Yes	Wildtype	Non-codel
CGGA_1068	0.186301	1	2.64734	Secondary	sGBM	WHO IV	Male	<=41	No	No	Mutant	Non-codel
CGGA_P159	0.578082	1	3.78614	Primary	AOA	WHO III	Male	>41	No	No	Wildtype	Non-codel
CGGA_251	3.5589	0	0.363616	Primary	OA	WHO II	Male	>41	Yes	No	Mutant	Non-codel
CGGA_1285	0.216438	1	2.43766	Recurrent	rGBM	WHO IV	Female	>41	No	No	Wildtype	Non-codel
CGGA_1440	5.3726	0	0.0936741	Primary	O	WHO II	Female	<=41	No	Yes	Mutant	Codel
CGGA_P86	2.81096	0	0.0936741	Primary	O	WHO II	Female	<=41	Yes	No	Mutant	Codel
CGGA_290	11.1644	0	0.0936741	Primary	OA	WHO II	Female	<=41	Yes	No	Mutant	Codel
CGGA_479	10.4438	0	-0.207534	Primary	OA	WHO II	Female	<=41	Yes	No	Mutant	Codel
CGGA_1314	0.471233	1	2.84545	Primary	GBM	WHO IV	Female	<=41	No	No	Mutant	Non-codel
CGGA_1144	6.86301	0	0.0936741	Primary	AA	WHO III	Female	<=41	Yes	Yes	Wildtype	Non-codel
CGGA_106	11.9836	0	0.0936741	Recurrent	rA	WHO II	Male	<=41	No	Yes	Wildtype	Non-codel
CGGA_1334	0.4	1	0.0936741	Primary	OA	WHO II	Female	<=41	Yes	Yes	Wildtype	Non-codel
CGGA_1248	0.378082	1	0.278213	Recurrent	rGBM	WHO IV	Male	>41	Yes	Yes	Wildtype	Non-codel
CGGA_1560	1.25753	1	3.38234	Primary	GBM	WHO IV	Female	<=41	Yes	Yes	Mutant	Non-codel
CGGA_1083	1.23288	1	2.03198	Primary	GBM	WHO IV	Male	>41	Yes	Yes	Wildtype	Non-codel
CGGA_235	6.41096	1	-0.207534	Primary	OA	WHO II	Male	<=41	Yes	Yes	Mutant	Codel
CGGA_1517	5.00274	0	0.0936741	Primary	O	WHO II	Male	>41	Yes	No	Mutant	Codel
CGGA_J023	2.81644	1	1.11375	Primary	AO	WHO III	Male	<=41	Yes	Yes	Mutant	Non-codel
CGGA_P89	0.805479	1	3.31246	Recurrent	rGBM	WHO IV	Male	>41	Yes	Yes	Wildtype	Non-codel
CGGA_1430	0.482192	1	2.42642	Recurrent	rGBM	WHO IV	Female	<=41	Yes	Yes	Wildtype	Non-codel
CGGA_P326	1.50959	0	0.0936741	Recurrent	rAA	WHO III	Female	>41	No	No	Mutant	Non-codel
CGGA_1624	0.238356	1	4.57839	Recurrent	rGBM	WHO IV	Female	<=41	Yes	Yes	Mutant	Non-codel
CGGA_510	10.3288	0	-0.207534	Primary	AO	WHO III	Male	>41	Yes	Yes	Mutant	Codel
CGGA_1537	0.547945	0	0.0936741	Primary	GBM	WHO IV	Male	>41	No	No	Wildtype	Non-codel
CGGA_1410	2.26027	1	0.202065	Primary	GBM	WHO IV	Female	<=41	Yes	Yes	Wildtype	Non-codel
CGGA_858	9.20274	0	-0.207534	Primary	O	WHO II	Male	>41	Yes	No	Mutant	Codel
CGGA_1157	2.03014	1	0.0936741	Primary	A	WHO II	Male	>41	Yes	Yes	Wildtype	Non-codel
CGGA_254	11.3507	0	-0.207534	Primary	OA	WHO II	Male	<=41	Yes	Yes	Mutant	Codel
CGGA_1238	6.25205	0	0.16239	Primary	OA	WHO II	Female	<=41	No	No	Wildtype	Non-codel
CGGA_1716	3.64932	0	0.148912	Recurrent	rAA	WHO III	Male	<=41	Yes	Yes	Mutant	Non-codel
CGGA_1776	0.709589	1	0.616981	Recurrent	rGBM	WHO IV	Male	<=41	Yes	Yes	Wildtype	Non-codel
CGGA_1114	1.26027	1	1.22874	Primary	GBM	WHO IV	Male	>41	Yes	Yes	Wildtype	Non-codel
CGGA_1218	0.783562	1	1.42004	Secondary	sGBM	WHO IV	Male	>41	No	Yes	Wildtype	Non-codel
CGGA_1736	2.56986	1	0.0936741	Primary	GBM	WHO IV	Female	>41	Yes	Yes	Wildtype	Non-codel
CGGA_791	0.690411	1	-0.207534	Primary	AA	WHO III	Male	>41	Yes	No	Wildtype	Non-codel
CGGA_D20	6.48493	1	-0.207534	Primary	A	WHO II	Female	<=41	No	No	Mutant	Non-codel
CGGA_1134	0.161644	1	2.48949	Primary	GBM	WHO IV	Female	>41	No	Yes	Wildtype	Non-codel
CGGA_1670	3.12603	0	0.373734	Recurrent	rAA	WHO III	Female	<=41	Yes	Yes	Wildtype	Non-codel
CGGA_1497	3.2274	1	0.781786	Primary	AOA	WHO III	Female	<=41	Yes	Yes	Mutant	Non-codel
CGGA_899	0.632877	1	2.73145	Recurrent	rGBM	WHO IV	Male	>41	No	Yes	Mutant	Non-codel
