# Supplementary material for: Abnormal expression of HOXD11 promotes the malignant behavior of glioma cells and leads to poor prognosis of glioma patients
Source: PeerJ. 2021 Feb 8;9:e10820. doi: 10.7717/peerj.10820 (PMC7877241; doi:10.7717/peerj.10820)
Supplement: Supplemental Information 9 [file peerj-09-10820-s009.xlsx]

## Sheet: Results
Block Type	96-Well 0.2-mL Block
Calibration Background is expired	No
Calibration Background performed on	2020.08.15
Calibration Pure Dye ABY is expired	No
Calibration Pure Dye ABY performed on	2020.08.15
Calibration Pure Dye FAM is expired	No
Calibration Pure Dye FAM performed on	2020.08.15
Calibration Pure Dye JUN is expired	No
Calibration Pure Dye JUN performed on	2020.08.15
Calibration Pure Dye NED is expired	No
Calibration Pure Dye NED performed on	2020.08.15
Calibration Pure Dye ROX is expired	No
Calibration Pure Dye ROX performed on	2020.08.15
Calibration Pure Dye SYBR is expired	No
Calibration Pure Dye SYBR performed on	2020.08.15
Calibration Pure Dye TAMRA is expired	No
Calibration Pure Dye TAMRA performed on	2020.08.15
Calibration Pure Dye VIC is expired	No
Calibration Pure Dye VIC performed on	2020.08.15
Calibration ROI is expired	No
Calibration ROI performed on	2020.08.15
Calibration Uniformity is expired	No
Calibration Uniformity performed on	2020.08.15
Chemistry	SYBR_GREEN
Date Created	2020.07.20 13:20:42 PM CST
Experiment Barcode
Experiment Comment
Experiment File Name	D:\Users\INSTR-ADMIN\Desktop\2020.08.15.eds
Experiment Name	2020.08.15
Experiment Run End Time	2020.08.15 12:15:22 PM CST
Experiment Type	Comparative Cт (ΔΔCт)
Instrument Name	272322040
Instrument Serial Number	272322040
Instrument Type	QuantStudio™ 3 System
Passive Reference	ROX
Post-read Stage/Step
Pre-read Stage/Step
Quantification Cycle Method	Ct
Signal Smoothing On	true
Stage where Melt Analysis is performed	Stage3
Stage/ Cycle where Ct Analysis is performed	Stage2, Step2
User Name	WJL
Well	Well Position	Omit	Sample Name	Target Name	Task	Reporter	Quencher	Quantity	Quantity Mean	Quantity SD	RQ	RQ Min	RQ Max	CT	Ct Mean	Ct SD	Delta Ct	Delta Ct Mean	Delta Ct SD	Delta Ct SE	Delta Delta Ct	Automatic Ct Threshold	Ct Threshold	Automatic Baseline	Baseline Start	Baseline End	Amp Status	Comments	Cq Conf	CQCONF	Tm1	HIGHSD	OUTLIERRG	MTP	Tm2	Tm3	Tm4
1	A1	FALSE	U251-NC-1	GAPDH	UNKNOWN	SYBR	None				0.848384	0.622918	1.15546	22.581	22.689	0.198593		1.60534	0.27803	0.160521	0.23721	TRUE	0.27389	TRUE	3	25	Amp		0.993741	N	84.6964	N	N	N
2	A2	FALSE	U251-NC-2	GAPDH	UNKNOWN	SYBR	None				0.848384	0.622918	1.15546	22.917	22.689	0.198593		1.60534	0.27803	0.160521	0.23721	TRUE	0.27389	TRUE	3	24	Amp		0.981722	N	84.6964	N	N	N
3	A3	FALSE	U251-NC-3	GAPDH	UNKNOWN	SYBR	None				0.848384	0.622918	1.15546	22.568	22.689	0.198593		1.60534	0.27803	0.160521	0.23721	TRUE	0.27389	TRUE	3	24	Amp		0.9954	N	84.5439	N	N	N
4	A4	FALSE	U251-NC-4	GAPDH	UNKNOWN	SYBR	None				0.848384	0.622918	1.15546	21.581	21.736	0.198593		1.60534	0.27803	0.160521	0.23721	TRUE	0.27389	TRUE	3	25	Amp		0.993741	N	84.6964	N	N	N
5	A5	FALSE	U251-NC-5	GAPDH	UNKNOWN	SYBR	None				0.848384	0.622918	1.15546	21.957	21.736	0.198593		1.60534	0.27803	0.160521	0.23721	TRUE	0.27389	TRUE	3	24	Amp		0.981722	N	84.6964	N	N	N
6	A6	FALSE	U251-NC-6	GAPDH	UNKNOWN	SYBR	None				0.848384	0.622918	1.15546	21.671	21.736	0.198593		1.60534	0.27803	0.160521	0.23721	TRUE	0.27389	TRUE	3	24	Amp		0.9954	N	84.5439	N	N	N
7	A7	FALSE	U251-NC-1	HOXD11	UNKNOWN	SYBR	None				0.848384	0.622918	1.15546	25.958	25.573	0.198593		1.60534	0.27803	0.160521	0.23721	TRUE	0.27389	TRUE	3	25	Amp		0.993741	N	84.6964	N	N	N
8	A8	FALSE	U251-NC-2	HOXD11	UNKNOWN	SYBR	None				0.848384	0.622918	1.15546	25.108	25.573	0.198593		1.60534	0.27803	0.160521	0.23721	TRUE	0.27389	TRUE	3	24	Amp		0.981722	N	84.6964	N	N	N
9	A9	FALSE	U251-NC-3	HOXD11	UNKNOWN	SYBR	None				0.848384	0.622918	1.15546	25.652	25.573	0.198593		1.60534	0.27803	0.160521	0.23721	TRUE	0.27389	TRUE	3	24	Amp		0.9954	N	84.5439	N	N	N
10	A10	FALSE	U251-NC-4	HOXD11	UNKNOWN	SYBR	None				0.848384	0.622918	1.15546	25.128	25.587	0.198593		1.60534	0.27803	0.160521	0.23721	TRUE	0.27389	TRUE	3	25	Amp		0.993741	N	84.6964	N	N	N
11	A11	FALSE	U251-NC-5	HOXD11	UNKNOWN	SYBR	None				0.848384	0.622918	1.15546	25.917	25.587	0.198593		1.60534	0.27803	0.160521	0.23721	TRUE	0.27389	TRUE	3	24	Amp		0.981722	N	84.6964	N	N	N
12	A12	FALSE	U251-NC-6	HOXD11	UNKNOWN	SYBR	None				0.848384	0.622918	1.15546	25.716	25.587	0.198593		1.60534	0.27803	0.160521	0.23721	TRUE	0.27389	TRUE	3	24	Amp		0.9954	N	84.5439	N	N	N
13	B1	FALSE	U251-SI-1	GAPDH	UNKNOWN	SYBR	None				0.801717	0.581694	1.10496	23.571	23.452	0.143869		1.68697	0.288733	0.1667	0.318834	TRUE	0.27389	TRUE	3	25	Amp		0.993378	N	84.5439	N	N	N
14	B2	FALSE	U251-SI-2	GAPDH	UNKNOWN	SYBR	None				0.801717	0.581694	1.10496	23.158	23.452	0.143869		1.68697	0.288733	0.1667	0.318834	TRUE	0.27389	TRUE	3	23	Amp		0.991775	N	84.5439	N	N	N
15	B3	FALSE	U251-SI-3	GAPDH	UNKNOWN	SYBR	None				0.801717	0.581694	1.10496	23.628	23.452	0.143869		1.68697	0.288733	0.1667	0.318834	TRUE	0.27389	TRUE	3	23	Amp		0.991958	N	84.3915	N	N	N
16	B4	FALSE	U251-SI-4	GAPDH	UNKNOWN	SYBR	None				0.801717	0.581694	1.10496	22.967	22.821	0.143869		1.68697	0.288733	0.1667	0.318834	TRUE	0.27389	TRUE	3	25	Amp		0.993378	N	84.5439	N	N	N
17	B5	FALSE	U251-SI-5	GAPDH	UNKNOWN	SYBR	None				0.801717	0.581694	1.10496	22.814	22.821	0.143869		1.68697	0.288733	0.1667	0.318834	TRUE	0.27389	TRUE	3	23	Amp		0.991775	N	84.5439	N	N	N
18	B6	FALSE	U251-SI-6	GAPDH	UNKNOWN	SYBR	None				0.801717	0.581694	1.10496	22.683	22.821	0.143869		1.68697	0.288733	0.1667	0.318834	TRUE	0.27389	TRUE	3	23	Amp		0.991958	N	84.3915	N	N	N
19	B7	FALSE	U251-SI-1	HOXD11	UNKNOWN	SYBR	None				0.801717	0.581694	1.10496	29.984	29.734	0.143869		1.68697	0.288733	0.1667	0.318834	TRUE	0.27389	TRUE	3	25	Amp		0.993378	N	84.5439	N	N	N
20	B8	FALSE	U251-SI-2	HOXD11	UNKNOWN	SYBR	None				0.801717	0.581694	1.10496	29.581	29.734	0.143869		1.68697	0.288733	0.1667	0.318834	TRUE	0.27389	TRUE	3	23	Amp		0.991775	N	84.5439	N	N	N
21	B9	FALSE	U251-SI-3	HOXD11	UNKNOWN	SYBR	None				0.801717	0.581694	1.10496	29.637	29.734	0.143869		1.68697	0.288733	0.1667	0.318834	TRUE	0.27389	TRUE	3	23	Amp		0.991958	N	84.3915	N	N	N
22	B10	FALSE	U251-SI-4	HOXD11	UNKNOWN	SYBR	None				0.801717	0.581694	1.10496	29.104	29.316	0.143869		1.68697	0.288733	0.1667	0.318834	TRUE	0.27389	TRUE	3	25	Amp		0.993378	N	84.5439	N	N	N
23	B11	FALSE	U251-SI-5	HOXD11	UNKNOWN	SYBR	None				0.801717	0.581694	1.10496	29.528	29.316	0.143869		1.68697	0.288733	0.1667	0.318834	TRUE	0.27389	TRUE	3	23	Amp		0.991775	N	84.5439	N	N	N
24	B12	FALSE	U251-SI-6	HOXD11	UNKNOWN	SYBR	None				0.801717	0.581694	1.10496	29.317	29.316	0.143869		1.68697	0.288733	0.1667	0.318834	TRUE	0.27389	TRUE	3	23	Amp		0.991958	N	84.3915	N	N	N
Analysis Type	Singleplex
Endogenous Control	GPX7
RQ Min/Max Confidence Level	95.0
Reference Sample	Sample 1

## Sheet: Sheet5
Sample Name	GAPDH	HOXD11	ΔCT	对照组ΔT的均值	实验组相对于对照组的表达量ΔΔCt	2-ΔΔCt
U251-NC-1	22.581	25.958	3.377	3.367	0	2
U251-NC-2	22.917	25.108	2.191		0	2
U251-NC-3	22.568	25.652	3.084		0	2
U251-NC-4	21.581	25.128	3.547		0	2
U251-NC-5	21.957	25.917	3.96		0	2
U251-NC-6	21.671	25.716	4.045		0	2
U251-SI-1	23.571	29.984	6.413	3.367	3.046	-1.046
U251-SI-2	23.158	29.581	6.423	3.367	3.056	-1.056
U251-SI-3	23.628	29.637	6.009	3.367	2.642	-0.642
U251-SI-4	22.967	29.104	6.137	3.367	2.77	-0.77
U251-SI-5	22.814	29.528	6.714	3.367	3.347	-1.347
U251-SI-6	22.683	29.317	6.634	3.367	3.267	-1.267

## Sheet: Sheet1
Sample Name	GAPDH	HOXD11
U251-NC-1	22.581	25.958
U251-NC-2	22.917	25.108
U251-NC-3	22.568	25.652
U251-NC-4	21.581	25.128
U251-NC-5	21.957	25.917
U251-NC-6	21.671	25.716

## Sheet: Sheet2
	GAPDH	HOXD11
U251-SI-1	23.571	29.984
U251-SI-2	23.158	29.581
U251-SI-3	23.628	29.637
U251-SI-4	22.967	29.104
U251-SI-5	22.814	29.528
U251-SI-6	22.683	29.317
