# Supplementary material for: Abnormal expression of HOXD11 promotes the malignant behavior of glioma cells and leads to poor prognosis of glioma patients
Source: PeerJ. 2021 Feb 8;9:e10820. doi: 10.7717/peerj.10820 (PMC7877241; doi:10.7717/peerj.10820)
Supplement: Supplemental Information 10 — Data analysis of colony formation assay after 10 days of cell transfection. [file peerj-09-10820-s010.xlsx]

## Sheet: Sheet1
	HOXD11-NC	HOXD11-siRNA
Number of clones	86	48
	100	56
	112	65
