# Supplementary material for: Abnormal expression of HOXD11 promotes the malignant behavior of glioma cells and leads to poor prognosis of glioma patients
Source: PeerJ. 2021 Feb 8;9:e10820. doi: 10.7717/peerj.10820 (PMC7877241; doi:10.7717/peerj.10820)
Supplement: Supplemental Information 35 — Data analysis of cell cycle distribution ratio by flow cytometry after cell transfection. [file peerj-09-10820-s035.xlsx]

## Sheet: Sheet1
SI
G1	0.4743		S	0.2559		G2	0.2699
G1	0.4917		S	0.2412		G2	0.2671
G1	0.4998		S	0.2507		G2	0.2496
NC
G1	0.6122		S	0.2633		G2	0.1244
G1	0.6369		S	0.202		G2	0.1611
G1	0.6396		S	0.1705		G2	0.1899
G1	0.6396		S	0.1705		G2	0.1899
