# Supplementary material for: Abnormal expression of HOXD11 promotes the malignant behavior of glioma cells and leads to poor prognosis of glioma patients
Source: PeerJ. 2021 Feb 8;9:e10820. doi: 10.7717/peerj.10820 (PMC7877241; doi:10.7717/peerj.10820)
Supplement: Supplemental Information 42 — Data analysis of the expression of key proteins in the G2 phase of the cell cycle by western blotting after cell transfection. [file peerj-09-10820-s042.xlsx]

## Sheet: Sheet1
CyclinB1	137.18	73.75	0.537615
	141.33	76.09
	142.42	87.68
CDK1	120.43	42.6	0.353732
	115.54	49.29
	117.11	48.8
Cdc25C	104.54	43.1	0.412282
	101.82	45.07
	105.92	48.1
GAPDH	221.04	232.57	1.05216
	216.26	228.25
	218.94	203.82
