# Supplementary material for: Abnormal expression of HOXD11 promotes the malignant behavior of glioma cells and leads to poor prognosis of glioma patients
Source: PeerJ. 2021 Feb 8;9:e10820. doi: 10.7717/peerj.10820 (PMC7877241; doi:10.7717/peerj.10820)
Supplement: Supplemental Information 48 [file peerj-09-10820-s048.xlsx]

## Sheet: TCGA
id	futime	fustat	HOXD11
TCGA-12-0618-01A-01R-1849-01	1.08219	1	0.179142
TCGA-02-2485-01A-01R-1849-01	1.28767	0	2.3933
TCGA-15-0742-01A-01R-1850-01	1.14795	1	0.182091
TCGA-06-0210-01A-01R-1849-01	0.616438	1	4.04851
TCGA-28-5204-01A-01R-1850-01	1.24384	1	1.72545
TCGA-06-0168-01A-01R-1849-01	1.63836	1	0.503514
TCGA-28-2514-01A-02R-1850-01	0.438356	0	6.09126
TCGA-06-0221-02A-11R-2005-01	1.65205	1	0.0427103
TCGA-14-1829-01A-01R-1850-01	0.59726	0	2.74824
TCGA-06-0152-02A-01R-2005-01	1.0274	1	0.0180133
TCGA-06-0187-01A-01R-1849-01	2.26849	1	1.77309
TCGA-06-0744-01A-01R-1849-01	3.90685	1	0.143486
TCGA-26-5139-01A-01R-1850-01	0.131507	0	4.64406
TCGA-06-0125-01A-01R-1849-01	3.96712	1	1.1821
TCGA-06-0190-02A-01R-2005-01	0.868493	1	3.0626
TCGA-12-0616-01A-01R-1849-01	1.2274	1	3.95713
TCGA-76-4928-01B-01R-1850-01	0.257534	1	1.31754
TCGA-06-0156-01A-03R-1849-01	0.487671	1	2.59798
TCGA-06-0686-01A-01R-1849-01	1.18356	1	1.96436
TCGA-06-0750-01A-01R-1849-01	0.0767123	1	0.703394
TCGA-28-1747-01C-01R-1850-01	0.210959	1	1.3611
TCGA-41-5651-01A-01R-1850-01	1.26027	1	3.56657
TCGA-19-2629-01A-01R-1850-01	2.01918	1	0.339699
TCGA-32-4213-01A-01R-1850-01	1.65479	0	2.72027
TCGA-06-0157-01A-01R-1849-01	0.265753	1	1.67284
TCGA-76-4925-01A-01R-1850-01	0.4	1	0.138964
TCGA-06-2565-01A-01R-1849-01	1.3863	1	2.62163
TCGA-06-0158-01A-01R-1849-01	0.90137	1	1.12991
TCGA-06-5413-01A-01R-1849-01	0.734247	0	3.79811
TCGA-76-4926-01B-01R-1850-01	0.378082	1	1.03938
TCGA-06-5417-01A-01R-1849-01	0.424658	0	0.195896
TCGA-06-2562-01A-01R-1849-01	1.04658	1	0.0936992
TCGA-41-3915-01A-01R-1850-01	0.986301	1	1.27348
TCGA-06-0130-01A-01R-1849-01	1.07945	1	1.19439
TCGA-06-0745-01A-01R-1849-01	0.654795	1	2.65564
TCGA-19-5960-01A-11R-1850-01	1.24658	1	1.06918
TCGA-06-0645-01A-01R-1849-01	0.479452	1	2.83602
TCGA-06-5858-01A-01R-1849-01	0.512329	0	0.0548548
TCGA-27-2521-01A-01R-1850-01	1.39726	1	4.40186
TCGA-19-1787-01B-01R-1850-01	1.05479	1	0.0717903
TCGA-06-0178-01A-01R-1849-01	7.34521	1	0.416866
TCGA-12-3652-01A-01R-1849-01	2.90959	1	2.74408
TCGA-28-5220-01A-01R-1850-01	1.06301	1	6.93937
TCGA-08-0386-01A-01R-1849-01	1.50137	1	2.1195
TCGA-06-5414-01A-01R-1849-01	0.747945	0	0.285862
TCGA-28-5215-01A-01R-1850-01	0.917808	1	0.766022
TCGA-06-2557-01A-01R-1849-01	0.090411	1	1.84416
TCGA-19-4065-02A-11R-2005-01	0.586301	0	0.951551
TCGA-26-5132-01A-01R-1850-01	0.783562	0	0.50817
TCGA-19-1389-02A-21R-2005-01	0.386301	1	0.437576
TCGA-32-1982-01A-01R-1850-01	0.389041	1	2.09602
TCGA-19-2624-01A-01R-1850-01	0.0136986	1	4.87598
TCGA-06-2570-01A-01R-1849-01	2.62466	0	0.102503
TCGA-32-2634-01A-01R-1850-01	1.89863	0	2.18365
TCGA-12-3650-01A-01R-1849-01	0.912329	1	2.55527
TCGA-06-0219-01A-01R-1849-01	0.060274	1	2.71655
TCGA-06-0141-01A-01R-1849-01	0.857534	1	0.0174023
TCGA-02-2486-01A-01R-1849-01	1.69315	1	0.145409
TCGA-28-5209-01A-01R-1850-01	1.21096	0	3.16436
TCGA-12-5295-01A-01R-1849-01	1.24384	1	0.108068
TCGA-06-0649-01B-01R-1849-01	0.175342	1	2.52171
TCGA-28-2513-01A-01R-1850-01	0.608219	0	0.151393
TCGA-06-0644-01A-02R-1849-01	1.05205	1	0.0266271
TCGA-32-2615-01A-01R-1850-01	1.32877	1	0.0081491
TCGA-41-2571-01A-01R-1850-01	0.0712329	1	1.17141
TCGA-06-2559-01A-01R-1849-01	0.410959	1	4.83561
TCGA-06-5410-01A-01R-1849-01	0.29589	1	0.671445
TCGA-06-5412-01A-01R-1849-01	0.378082	1	1.78789
TCGA-27-1835-01A-01R-1850-01	1.77534	1	3.13706
TCGA-76-4932-01A-01R-1850-01	3.99452	1	1.15505
TCGA-28-2499-01A-01R-1850-01	0.260274	1	0.00971126
TCGA-19-2625-01A-01R-1850-01	0.339726	1	2.78982
TCGA-06-5418-01A-01R-1849-01	0.227397	1	3.35961
TCGA-12-0821-01A-01R-1849-01	0.884932	1	4.84659
TCGA-06-0211-02A-02R-2005-01	0.986301	1	0.181646
TCGA-06-2558-01A-01R-1849-01	1.0411	1	2.0814
TCGA-28-5208-01A-01R-1850-01	1.49041	1	3.18626
TCGA-26-5134-01A-01R-1850-01	0.457534	0	6.17265
TCGA-14-1823-01A-01R-1849-01	1.48767	1	1.67063
TCGA-26-5135-01A-01R-1850-01	0.739726	1	0.598626
TCGA-14-1402-02A-01R-2005-01	2.67123	1	1.82885
TCGA-06-2563-01A-01R-1849-01	2.55342	0	0.3815
TCGA-41-2572-01A-01R-1850-01	1.11233	1	2.42143
TCGA-27-2526-01A-01R-1850-01	0.238356	1	0.0412843
TCGA-06-0138-01A-02R-1849-01	2.01918	1	2.99281
TCGA-06-0238-01A-02R-1849-01	1.10959	1	2.38911
TCGA-06-1804-01A-01R-1849-01	1.13425	1	5.76595
TCGA-26-5136-01B-01R-1850-01	1.58082	1	0.943094
TCGA-06-5408-01A-01R-1849-01	0.978082	1	3.4665
TCGA-19-2620-01A-01R-1850-01	0.405479	1	0.175637
TCGA-16-0846-01A-01R-1850-01	0.326027	1	2.89627
TCGA-06-0184-01A-01R-1849-01	5.82466	1	0.0543798
TCGA-12-3653-01A-01R-1849-01	1.21096	1	0.0456037
TCGA-27-2519-01A-01R-1850-01	1.50685	1	1.60423
TCGA-06-0743-01A-01R-1849-01	2.2	1	4.2903
TCGA-06-0882-01A-01R-1849-01	1.73151	1	0.018955
TCGA-28-2509-01A-01R-1850-01	0.39726	0	1.56823
TCGA-06-0132-01A-02R-1849-01	2.11233	1	0.273738
TCGA-28-5207-01A-01R-1850-01	0.939726	1	3.68289
TCGA-19-0957-02A-11R-2005-01	1.82466	1	0.803077
TCGA-26-5133-01A-01R-1850-01	1.23836	0	1.211
TCGA-12-5299-01A-02R-1849-01	0.268493	1	0.00875161
TCGA-06-0129-01A-01R-1849-01	2.80548	1	2.48398
TCGA-12-1597-01B-01R-1849-01	1.84932	1	0.0750167
TCGA-14-1825-01A-01R-1850-01	0.635616	1	2.89564
TCGA-06-5856-01A-01R-1849-01	0.312329	1	1.52743
TCGA-14-0790-01B-01R-1849-01	1.14795	1	1.27809
TCGA-14-0781-01B-01R-1849-01	0.0794521	1	2.54193
TCGA-27-1832-01A-01R-1850-01	0.821918	1	1.20267
TCGA-15-1444-01A-02R-1850-01	4.21096	1	0.254892
TCGA-27-2523-01A-01R-1850-01	1.33973	1	2.42863
TCGA-27-1837-01A-01R-1850-01	1.16986	1	4.69555
TCGA-32-2632-01A-01R-1850-01	0.736986	1	3.20766
TCGA-32-5222-01A-01R-1850-01	1.60274	1	1.35461
TCGA-32-2638-01A-01R-1850-01	2.09863	1	0.0855967
TCGA-06-0171-02A-11R-2005-01	1.09315	1	0.139206
TCGA-27-1830-01A-01R-1850-01	0.421918	1	1.29245
TCGA-14-0736-02A-01R-2005-01	1.26027	1	2.19358
TCGA-14-1034-01A-01R-1849-01	1.32877	1	0.0258883
TCGA-14-2554-01A-01R-1850-01	1.45753	1	0.31175
TCGA-06-0747-01A-01R-1849-01	0.224658	1	2.81828
TCGA-41-4097-01A-01R-1850-01	0.0164384	1	0.592357
TCGA-14-0787-01A-01R-1849-01	0.186301	1	3.47636
TCGA-06-0646-01A-01R-1849-01	0.479452	1	5.7951
TCGA-14-0817-01A-01R-1849-01	0.449315	1	0.172575
TCGA-06-0139-01A-01R-1849-01	0.991781	1	0
TCGA-28-5216-01A-01R-1850-01	1.13699	0	1.79685
TCGA-19-1390-01A-01R-1850-01	2.11507	1	0.137653
TCGA-32-2616-01A-01R-1850-01	0.613699	1	0.211618
TCGA-12-0619-01A-01R-1849-01	2.90959	1	1.55422
TCGA-76-4929-01A-01R-1850-01	0.30411	1	6.54618
TCGA-06-0878-01A-01R-1849-01	0.59726	0	2.95016
TCGA-26-1442-01A-01R-1850-01	2.61096	0	0.0429466
TCGA-02-2483-01A-01R-1849-01	1.27671	0	0.115398
TCGA-27-1834-01A-01R-1850-01	3.37808	1	2.32541
TCGA-14-0789-01A-01R-1849-01	0.936986	1	0.25311
TCGA-06-5859-01A-01R-1849-01	0.380822	0	3.13028
TCGA-06-5416-01A-01R-1849-01	0.558904	0	0.150413
TCGA-32-1980-01A-01R-1850-01	0.0986301	1	0.368741
TCGA-28-1753-01A-01R-1850-01	0.10137	0	1.69359
TCGA-19-2619-01A-01R-1850-01	0.805479	0	0.229512
TCGA-06-2564-01A-01R-1849-01	0.49589	0	0.185842
TCGA-32-1970-01A-01R-1850-01	1.28219	1	0.168547
TCGA-06-2561-01A-02R-1849-01	1.47123	1	5.05533
TCGA-16-1045-01B-01R-1850-01	2.41918	1	0.308106
TCGA-28-5218-01A-01R-1850-01	0.430137	1	3.4677
TCGA-76-4931-01A-01R-1850-01	0.764384	1	0.531379
TCGA-27-2524-01A-01R-1850-01	0.632877	1	0.186073
TCGA-76-4927-01A-01R-1850-01	1.46575	1	4.24853
TCGA-02-0047-01A-01R-1849-01	1.2274	1	1.09085
TCGA-27-2528-01A-01R-1850-01	1.31507	1	1.7726
TCGA-06-5411-01A-01R-1849-01	0.69589	1	1.5362
TCGA-27-1831-01A-01R-1850-01	1.38356	1	0.17695
TCGA-06-0174-01A-01R-1849-01	0.268493	1	5.46806
TCGA-28-5213-01A-01R-1850-01	2.60548	1	0.671024
TCGA-02-0055-01A-01R-1849-01	0.208219	1	0.737977
TCGA-CS-5396-01A-02R-1470-07	4.46849	0	0.0373194
TCGA-DU-8158-01A-11R-2256-07	0.424658	1	2.47483
TCGA-S9-A89V-01A-11R-A36H-07	1.5589	0	0
TCGA-DU-6404-01A-11R-1708-07	11.1452	1	0.00628015
TCGA-S9-A7QZ-01A-12R-A34R-07	2.26301	0	0
TCGA-DU-8162-01A-21R-2256-07	1.21644	1	0.0495405
TCGA-QH-A65X-01A-11R-A32Q-07	1.32055	0	0
TCGA-DH-5143-01A-01R-1470-07	3.83836	0	0
TCGA-CS-4944-01A-01R-1470-07	5.00822	0	0
TCGA-QH-A6X4-01A-51R-A32Q-07	1.21096	0	0
TCGA-E1-A7YK-01A-11R-A34F-07	1.03562	1	0.0249262
TCGA-DU-7013-01A-11R-2027-07	0.736986	1	0.0880282
TCGA-S9-A7R8-01A-11R-A34R-07	2.63288	1	0
TCGA-HT-7604-01A-11R-2090-07	10.2055	0	0.00772861
TCGA-HT-8013-01A-11R-2403-07	5.29589	1	0
TCGA-WY-A85D-01A-11R-A36H-07	3.14247	0	0
TCGA-DU-6400-01A-12R-1708-07	0.10137	1	0.042457
TCGA-P5-A72W-01A-11R-A32Q-07	0.868493	0	0.0298893
TCGA-VM-A8CD-01A-11R-A36H-07	0.657534	1	0
TCGA-DU-6407-02A-12R-A36H-07	7.87671	1	0.0101747
TCGA-S9-A7R3-01A-11R-A34R-07	8.25479	0	0.010257
TCGA-DU-A7TC-01A-21R-A34R-07	3.11507	0	0
TCGA-DB-5279-01A-03R-2347-07	3.70959	0	0.0263538
TCGA-FG-A4MT-02A-11R-A29R-07	3.18904	0	0
TCGA-DU-A7TD-01A-12R-A34F-07	0.624658	1	3.71864
TCGA-TM-A84M-01A-11R-A36H-07	2.06575	0	0
TCGA-HT-7693-01A-11R-2256-07	1.46027	0	0
TCGA-HT-7476-01A-11R-2027-07	0.545205	0	0.00812177
TCGA-P5-A72X-01A-11R-A32Q-07	1.10411	0	0
TCGA-HT-7485-01A-11R-2027-07	0.334247	0	0
TCGA-P5-A5EW-01A-11R-A27Q-07	0.558904	0	0
TCGA-FG-A60K-01A-11R-A29R-07	1.48493	0	0
TCGA-HT-8015-01B-11R-A28M-07	0.00821918	0	0
TCGA-FG-A60J-01A-11R-A28M-07	1.23014	0	0
TCGA-HT-8105-01A-11R-2404-07	0.520548	0	0
TCGA-TM-A7CA-01A-21R-A33Z-07	2.89863	0	0
TCGA-HW-7490-01A-11R-2027-07	3.8	0	0
TCGA-HT-7611-01A-11R-2403-07	4.8	0	0
TCGA-HT-7467-01A-11R-2027-07	0.00821918	0	0
TCGA-VM-A8CB-01A-11R-A36H-07	0.00821918	0	0
TCGA-HT-A615-01A-11R-A29R-07	1.41096	0	0
TCGA-E1-A7YQ-01A-11R-A34R-07	4.32329	1	0.00866507
TCGA-P5-A730-01A-11R-A32Q-07	0.912329	0	0
TCGA-QH-A6X8-01A-12R-A32Q-07	1.39452	0	0.04192
TCGA-S9-A6WD-01A-12R-A33Z-07	6.27123	0	0.00863772
TCGA-S9-A7IQ-01A-21R-A34F-07	3.01096	0	0
TCGA-S9-A6TY-01A-12R-A32Q-07	2.94795	0	0
TCGA-HT-7602-01A-21R-2090-07	2.48767	0	0
TCGA-HT-A61C-01A-11R-A29R-07	1.47123	1	8.95623
TCGA-FG-8186-01A-11R-2256-07	1.33425	0	0
TCGA-FG-5963-02A-12R-A29R-07	2.12329	1	0.97683
TCGA-E1-A7YW-01A-11R-A34R-07	3.06849	1	0.00933747
TCGA-DB-A64W-01A-11R-A29R-07	1.2	1	0.0215703
TCGA-HT-7691-01A-11R-2256-07	0.00821918	0	0
TCGA-TQ-A7RV-01A-21R-A34F-07	5.11781	0	0
TCGA-F6-A8O3-01A-11R-A36H-07	0.0191781	0	0
TCGA-S9-A6WQ-01A-12R-A34F-07	1.1726	0	0.00871776
TCGA-S9-A6U6-01A-12R-A33Z-07	2.92877	0	0
TCGA-HW-8320-01A-11R-2404-07	3.33425	0	0.00766209
TCGA-DU-7304-02A-12R-A36H-07	1.94247	1	9.32075
TCGA-E1-5311-01A-01R-1470-07	11.189	1	0.00662009
TCGA-VM-A8CE-01A-11R-A36H-07	3.26301	0	0
TCGA-HT-7474-01A-11R-2027-07	0.312329	0	0
TCGA-QH-A65Z-01A-11R-A29R-07	1.16986	0	0
TCGA-14-0871-01A-01R-1849-01	2.41096	1	1.4003
TCGA-06-2569-01A-01R-1849-01	0.0356164	0	4.56803
TCGA-06-0749-01A-01R-1849-01	0.224658	1	3.32023
TCGA-DB-5277-01A-01R-1470-07	4.23836	1	0.00822786
TCGA-TM-A84C-01A-11R-A36H-07	1.34795	1	0
TCGA-CS-6670-01A-11R-1896-07	3.90685	0	0
TCGA-S9-A7J1-01A-21R-A34R-07	0.682192	0	0
TCGA-HT-7687-01A-11R-2256-07	0.00821918	0	0
TCGA-FG-A6J1-01A-11R-A31N-07	1.36986	0	0
TCGA-FG-A711-01A-21R-A33Z-07	4.05753	1	0
TCGA-QH-A6CY-01A-11R-A32Q-07	1.11781	0	0
TCGA-FG-A710-01A-12R-A33Z-07	3.05479	0	0
TCGA-S9-A7R2-01A-21R-A34R-07	0.865753	1	0.476954
TCGA-HT-A618-01A-11R-A29R-07	1.40274	0	0
TCGA-P5-A77X-01A-11R-A32Q-07	0.287671	0	0.0084076
TCGA-RY-A83Z-01A-11R-A36H-07	0.824658	0	0.93076
TCGA-DB-A64O-01A-11R-A29R-07	2.12329	1	0
TCGA-FG-8188-01A-11R-2256-07	1.24658	0	0
TCGA-E1-A7YI-01A-11R-A34F-07	0.30411	1	1.42548
TCGA-P5-A5F6-01A-11R-A28M-07	0.106849	0	0
TCGA-S9-A7R7-01A-11R-A34R-07	8.21918	0	0.0353074
TCGA-HW-8322-01A-11R-2404-07	2.07671	0	0
TCGA-HT-7692-01A-12R-2256-07	0.246575	0	0
TCGA-HT-7858-01A-11R-2403-07	4.21918	0	0
TCGA-HW-7489-01A-11R-2027-07	3.45753	1	0.00743942
TCGA-HT-A614-01A-11R-A29R-07	0.224658	0	0
TCGA-DU-A5TY-01A-11R-A28M-07	2.83014	1	1.12835
TCGA-DU-5852-01A-11R-1708-07	0.561644	1	4.11897
TCGA-DB-A64L-01A-11R-A29R-07	2.01644	0	0.0104898
TCGA-CS-4942-01A-01R-1470-07	3.65753	1	0
TCGA-HT-A74K-01A-11R-A32Q-07	1.27945	0	0.0223396
TCGA-HT-7680-01A-11R-2256-07	0.0630137	0	0
TCGA-S9-A6UB-01A-21R-A33Z-07	10.3041	0	0
TCGA-HT-8108-01A-11R-2404-07	0.208219	0	0
TCGA-DB-A4XD-01A-11R-A27Q-07	3.31507	0	0
TCGA-HT-7884-01B-11R-2403-07	0.939726	0	0
TCGA-FG-6688-01A-11R-1896-07	1.56438	0	0.030288
TCGA-S9-A6WI-01A-21R-A33Z-07	7.08219	0	0
TCGA-HT-7688-01A-11R-2256-07	2.6411	0	0.00629744
TCGA-S9-A6TV-01A-12R-A34R-07	1.56438	0	0.0200862
TCGA-HT-7616-01A-11R-2256-07	0.0191781	1	0
TCGA-P5-A5F4-01A-11R-A28M-07	0.632877	0	0.0103809
TCGA-QH-A6X5-01A-12R-A32Q-07	1.36164	0	0.0189343
TCGA-QH-A6CS-01A-11R-A31N-07	1.61096	0	0
TCGA-FG-7643-01A-11R-2090-07	1.67397	0	0
TCGA-CS-4938-01B-11R-1896-07	9.79178	0	0
TCGA-HT-7695-01A-11R-2256-07	1.21096	0	0
TCGA-HT-A61A-01A-11R-A29R-07	0.531507	0	0
TCGA-TM-A84T-01A-11R-A36H-07	1.98356	0	0
TCGA-P5-A780-01A-12R-A32Q-07	0.19726	0	0.00787769
TCGA-P5-A77W-01A-11R-A32Q-07	1.6	0	0
TCGA-DU-6402-01A-11R-1708-07	0.586301	1	0.833137
TCGA-FG-A87N-01A-11R-A36H-07	1.55342	0	0.639818
TCGA-DU-A5TS-01A-11R-A28M-07	2.6411	0	0.0120027
TCGA-HT-7676-01A-11R-2403-07	0.0136986	0	0
TCGA-DB-A75P-01A-11R-A32Q-07	1.34795	0	0
TCGA-HT-A4DV-01A-11R-A26U-07	2.16986	0	0
TCGA-E1-A7YE-01A-11R-A34F-07	2.4274	1	0.00718987
TCGA-FG-A70Y-01A-12R-A34R-07	2.37808	0	0.00860188
TCGA-QH-A6CU-01A-11R-A31N-07	1.23562	0	0
TCGA-QH-A6CV-01A-11R-A31N-07	1.21096	0	2.19361
TCGA-S9-A6TS-01A-12R-A33Z-07	5.18082	1	0
TCGA-TQ-A7RM-01A-11R-A33Z-07	3.05753	0	0
TCGA-HT-7473-01A-11R-2027-07	1.37808	0	0
TCGA-DU-8163-01A-11R-2256-07	1.72329	0	0
TCGA-DU-8167-01A-11R-2256-07	1.29041	0	0.035943
TCGA-HT-8010-01A-11R-2403-07	0.136986	0	0
TCGA-HT-7480-01A-11R-2090-07	6.26575	0	0
TCGA-E1-A7YO-01A-11R-A34F-07	6.25205	1	0
TCGA-HT-8564-01A-11R-2404-07	1.30959	0	5.25028
TCGA-DU-7010-01A-11R-2027-07	1.24932	1	0.0134351
TCGA-DB-A4XC-01A-11R-A26U-07	3.89315	0	0
TCGA-HT-7874-01A-11R-2403-07	3.09589	0	0.00713453
TCGA-S9-A6WL-01A-21R-A33Z-07	2.59178	0	0.0195864
TCGA-DU-7302-01A-11R-2090-07	5.02466	0	0
TCGA-HT-8558-01A-21R-2404-07	1.14521	0	0
TCGA-HT-7605-01A-11R-2090-07	0.380822	0	0
TCGA-HT-8018-01A-11R-2404-07	3.15616	1	0.0850877
TCGA-TQ-A7RW-01A-11R-A33Z-07	2.24932	1	0.022692
TCGA-DB-A4XH-01A-11R-A27Q-07	2.63562	0	0
TCGA-DB-A4XB-01A-11R-A26U-07	2.51781	0	0
TCGA-DU-6408-01A-11R-1708-07	9.50685	1	0.00851626
TCGA-S9-A6WG-01A-11R-A33Z-07	7.12877	0	0
TCGA-HT-7686-01A-11R-2256-07	3.56164	0	0.0159236
TCGA-HT-8011-01A-11R-2403-07	1.35342	0	3.82095
TCGA-CS-5393-01A-01R-1470-07	3.34795	0	0
TCGA-DU-5872-02A-21R-A36H-07	1.45753	0	0.0109682
TCGA-CS-6666-01A-11R-1896-07	3.91233	0	0
TCGA-DU-A5TU-01A-11R-A28M-07	2.18082	0	0.546153
TCGA-CS-6290-01A-11R-1708-07	3.11507	1	0.0244912
TCGA-HW-8321-01A-11R-2404-07	3.54521	0	0.00695505
TCGA-DU-A6S7-01A-21R-A32Q-07	1.74795	0	0
TCGA-HT-7882-01A-11R-2403-07	0.309589	1	0.513429
TCGA-S9-A7QW-01A-11R-A34F-07	1.25479	0	0
TCGA-DU-6542-01A-11R-1896-07	0.2	1	0
TCGA-HW-8319-01A-11R-2404-07	3.31233	1	0.00696673
TCGA-IK-7675-01A-11R-2090-07	1.58356	1	0.0219404
TCGA-DB-A4XE-01A-11R-A27Q-07	3.12055	0	0
TCGA-DB-5280-01A-01R-1470-07	3.04658	0	0
TCGA-FG-8187-01A-11R-2256-07	1.67397	0	0
TCGA-DU-A7TJ-01A-11R-A34R-07	0.0465753	0	1.79864
TCGA-DB-5278-01A-01R-1470-07	7.59452	0	0
TCGA-HT-7470-01A-12R-2090-07	3.34247	1	0.0338519
TCGA-S9-A6U8-01A-21R-A33Z-07	8.1863	1	0
TCGA-FG-6690-01A-11R-1896-07	3.54521	0	0
TCGA-DH-A7US-01A-11R-A33Z-07	1.93425	0	0
TCGA-F6-A8O4-01A-11R-A36H-07	0.0164384	0	0
TCGA-HT-7689-01A-11R-2256-07	1.24658	0	0.0075132
TCGA-HT-8111-01A-11R-2404-07	0.0191781	0	0
TCGA-P5-A781-01A-11R-A32Q-07	0.367123	0	0
TCGA-E1-5319-01A-01R-1896-07	7.96438	1	0
TCGA-HT-7875-01A-11R-2403-07	0.0273973	0	0.00688788
TCGA-VM-A8C9-01A-11R-A36H-07	3.6	0	0.0348475
TCGA-HT-A616-01A-11R-A29R-07	0.150685	0	0
TCGA-S9-A7R1-01A-12R-A34R-07	14.1534	1	0.0322163
TCGA-CS-4941-01A-01R-1470-07	0.641096	1	0.626015
TCGA-DU-5870-01A-11R-1708-07	15.1945	0	0
TCGA-FG-7637-01A-11R-2090-07	3.33973	0	0
TCGA-CS-6668-01A-11R-1896-07	4.16164	0	0
TCGA-S9-A6U5-01A-12R-A33Z-07	2.71781	0	0.00842847
TCGA-DH-A66G-01A-21R-A31N-07	1.43288	0	0
TCGA-S9-A6UA-01A-12R-A33Z-07	0.487671	1	0.0307385
TCGA-P5-A5EV-01A-11R-A27Q-07	0.0191781	0	0
TCGA-E1-A7YJ-01A-11R-A34F-07	1.62192	1	2.45018
TCGA-DB-5273-01A-01R-1470-07	6.83014	0	0
TCGA-FG-5964-01A-11R-1708-07	4.35068	0	0
TCGA-HT-7681-01A-11R-2403-07	3.72329	0	0
TCGA-TQ-A7RK-02B-11R-A40A-07	3.67397	0	0
TCGA-HT-7603-01A-21R-2090-07	1.93151	0	0
TCGA-IK-8125-01A-11R-2256-07	3.56438	0	0
TCGA-P5-A735-01A-11R-A32Q-07	0.8	0	0
TCGA-S9-A6WN-01A-12R-A33Z-07	2.20548	0	0
TCGA-DB-5281-01A-01R-1470-07	6.52329	0	0
TCGA-HT-7478-01A-11R-2027-07	0.531507	0	0.0069684
TCGA-TQ-A7RH-01A-12R-A34F-07	1.33151	0	0
TCGA-DU-7301-01A-11R-2090-07	2.1589	1	0.0456577
TCGA-HT-7879-01A-11R-2403-07	0.306849	0	0
TCGA-CS-6188-01A-11R-1896-07	2.23014	1	0.0162532
TCGA-DH-5144-01A-01R-1470-07	2.04932	0	0.0073415
TCGA-P5-A5EY-01A-11R-A27Q-07	0.19726	0	0
TCGA-DU-7306-01A-11R-2090-07	3.49863	0	0.256082
TCGA-TM-A7C3-01A-11R-A32Q-07	4.56438	1	4.68349
TCGA-TM-A7C5-01A-11R-A32Q-07	4.10959	0	0
TCGA-TM-A7C4-01A-11R-A32Q-07	4.0274	0	0
TCGA-HT-7694-01A-11R-2256-07	0.575342	0	0
TCGA-HT-7677-01A-11R-2256-07	1.35342	0	0.00673641
TCGA-DU-5849-01A-11R-1708-07	1.2137	0	0
TCGA-DU-A76R-01A-11R-A32Q-07	1.77534	1	0
TCGA-TM-A84R-01A-21R-A36H-07	1.55068	0	0
TCGA-HT-7479-01A-11R-2027-07	3.36164	0	0
TCGA-QH-A65R-01A-21R-A31N-07	1.26301	0	0.00852745
TCGA-E1-A7YS-01A-11R-A34F-07	1.27671	1	0.413925
TCGA-DB-A75O-01A-11R-A32Q-07	2.56164	0	0
TCGA-FG-7641-01B-11R-2256-07	1.71781	0	0
TCGA-FG-A4MY-01A-11R-A26U-07	1.97534	0	0.0141862
TCGA-DU-6397-01A-11R-1708-07	3.83836	1	0.00750307
TCGA-HT-7606-01A-11R-2090-07	1.4411	0	0
TCGA-TQ-A7RG-01A-11R-A33Z-07	1.6411	0	0
TCGA-DU-6395-01A-13R-1708-07	4.08493	1	0
TCGA-KT-A7W1-01A-11R-A34F-07	1.2	0	2.39419
TCGA-DH-A7UR-01A-11R-A33Z-07	4.52055	0	0.027651
TCGA-DB-A4X9-01A-11R-A26U-07	3.86849	0	0
TCGA-RY-A843-01A-11R-A36H-07	0.172603	0	0
TCGA-HT-A4DS-01A-11R-A26U-07	0.0191781	0	0
TCGA-R8-A6ML-01A-11R-A32Q-07	7.83562	0	0.0236579
TCGA-W9-A837-01A-11R-A36H-07	4.25479	0	0.00806183
TCGA-P5-A5F1-01A-11R-A28M-07	0.490411	0	0
TCGA-DU-A76L-01A-11R-A32Q-07	2.23014	1	1.14579
TCGA-TQ-A7RI-01A-11R-A33Z-07	0.169863	0	0
TCGA-DH-A669-02A-11R-A31N-07	2.51781	1	0.0838469
TCGA-DU-A7T8-01A-21R-A34R-07	11.5863	1	0.00791019
TCGA-HT-7860-01A-11R-2403-07	0.0410959	0	2.15755
TCGA-DU-A7TI-01A-11R-A33Z-07	3.2411	1	0.0186613
TCGA-DU-A7TG-01A-21R-A34R-07	3.70137	1	0
TCGA-TM-A84L-01A-11R-A36H-07	3.40274	1	0
TCGA-KT-A74X-01A-11R-A32Q-07	1.2	0	0.0188328
TCGA-FG-8182-01A-11R-2256-07	1.13973	0	0.00786973
TCGA-HT-7690-01A-11R-2256-07	0.00821918	0	0
TCGA-DU-A5TR-01A-11R-A28M-07	2.48767	0	0
TCGA-HT-7610-01A-21R-2090-07	4.67397	0	0
TCGA-S9-A7R4-01A-12R-A34R-07	2.50411	0	0
TCGA-HW-7493-01A-11R-2027-07	5.7726	0	0
TCGA-DU-6392-01A-11R-1708-07	17.5973	0	0.0376469
TCGA-HW-7491-01A-11R-2027-07	5.69315	0	0
TCGA-TM-A84Q-01A-11R-A36H-07	2.11507	0	0
TCGA-DU-7298-01A-11R-2027-07	1.57808	1	0
TCGA-HT-7608-01A-11R-2090-07	1.83836	0	0
TCGA-E1-A7YN-01A-11R-A34F-07	1.99178	1	0.534199
TCGA-DH-A7UU-01A-12R-A34F-07	1.14247	0	0.0285574
TCGA-E1-A7Z6-01A-11R-A34R-07	2.69589	1	0
TCGA-S9-A6WP-01A-12R-A34F-07	1.55342	0	0
TCGA-FG-8191-01A-11R-2256-07	2.71781	0	0
TCGA-TQ-A7RQ-01A-11R-A33Z-07	2.17808	0	0.00714326
TCGA-S9-A6TZ-01A-21R-A32Q-07	3.06849	0	0.0160962
TCGA-DU-7006-01A-11R-2027-07	0.956164	1	0.195095
TCGA-TM-A7CF-02A-11R-A32Q-07	5.44932	0	0.0186084
TCGA-WH-A86K-01A-11R-A36H-07	1.10959	0	0
TCGA-DU-A5TW-01A-11R-A28M-07	2.08219	0	0
TCGA-TQ-A8XE-02A-11R-A36H-07	2.6137	1	0
TCGA-RY-A847-01A-11R-A36H-07	2.55616	0	0.0104801
TCGA-E1-A7YD-01A-11R-A34F-07	1.19178	1	1.23272
TCGA-RY-A845-01A-11R-A36H-07	1.63288	0	0
TCGA-P5-A5F0-01A-11R-A28M-07	0.786301	0	0
TCGA-DU-8168-01A-11R-2256-07	1.18082	0	0
TCGA-DU-7019-01A-11R-2027-07	2.19178	0	0
TCGA-DH-A66F-01A-11R-A29R-07	1.43288	0	0.0193892
TCGA-QH-A6X9-01A-12R-A32Q-07	0.158904	0	0.00857841
TCGA-DU-5847-01A-11R-1708-07	1.50137	0	0.883664
TCGA-HT-A619-01A-11R-A29R-07	1.78356	0	0
TCGA-DH-A7UT-01A-12R-A34F-07	1.45479	1	0
TCGA-HT-A61B-01A-11R-A29R-07	1.46027	0	0.0202891
TCGA-P5-A737-01A-11R-A32Q-07	1.01918	0	0
TCGA-DU-7299-01A-21R-2027-07	3.66849	1	0
TCGA-DU-8165-01A-11R-2256-07	1.59452	0	1.11113
TCGA-CS-5397-01A-01R-1896-07	0.531507	1	0
TCGA-DU-7008-01A-11R-2027-07	13.0192	0	0.00594204
TCGA-S9-A7IS-01A-11R-A34F-07	0.660274	1	0.410425
TCGA-FG-6692-01A-11R-1896-07	1.53699	1	2.16487
TCGA-HT-8012-01A-11R-2403-07	0.783562	0	0
TCGA-S9-A6U2-01A-21R-A33Z-07	2.48767	0	0
TCGA-HT-7902-01A-12R-2403-07	2.61918	0	0
TCGA-DB-A64V-01A-11R-A29R-07	2.43562	0	0
TCGA-FG-5965-02A-11R-A29R-07	3.06849	1	0.0469843
TCGA-HT-A5R9-01A-11R-A28M-07	0.00547945	0	0
TCGA-P5-A5F2-01A-11R-A28M-07	0.663014	0	0
TCGA-CS-6186-01A-12R-2027-07	1.47397	1	0
TCGA-HT-7854-01A-11R-2256-07	3.29041	0	0.0216627
TCGA-S9-A6WH-01A-12R-A33Z-07	3.2137	0	0
TCGA-FG-8185-01A-11R-2256-07	1.1863	0	0
TCGA-DU-6406-01A-11R-1708-07	1.40274	1	0.133489
TCGA-HT-7481-01A-11R-2027-07	7.99452	0	0
TCGA-HT-A74H-01A-11R-A32Q-07	0.20274	0	0.540556
TCGA-HW-A5KK-01A-11R-A27Q-07	1.06301	1	0.0333391
TCGA-S9-A6U9-01A-11R-A32Q-07	7.99452	0	0
TCGA-E1-A7YH-01A-11R-A34F-07	7.76712	1	0.0164513
TCGA-S9-A7QX-01A-11R-A34F-07	1.54521	0	0
TCGA-HT-8104-01A-11R-2404-07	1.01918	0	1.56309
TCGA-E1-A7YV-01A-11R-A34R-07	2.70411	1	3.96838
TCGA-WY-A858-01A-11R-A36H-07	3.66301	0	0
TCGA-S9-A6TX-01A-21R-A32Q-07	3.41096	0	0.00837174
TCGA-TM-A84S-01A-11R-A36H-07	1.24384	0	0
TCGA-QH-A6CZ-01A-11R-A32Q-07	0.764384	0	0
TCGA-QH-A6CW-01A-11R-A32Q-07	1.13425	0	0
TCGA-DU-8161-01A-11R-2256-07	1.97808	1	0.0130868
TCGA-QH-A6XA-01A-12R-A32Q-07	1.37534	0	0
TCGA-HT-A617-01A-11R-A29R-07	1.34521	0	0
TCGA-FG-6689-01A-11R-1896-07	1.24384	0	0
TCGA-DB-A75M-01A-11R-A32Q-07	1.49041	0	0
TCGA-E1-A7Z3-01A-11R-A34R-07	6.12329	1	0
TCGA-FG-7636-01A-11R-2090-07	1.49041	0	0
TCGA-S9-A7IZ-01A-11R-A34F-07	1.66575	0	0.00900627
TCGA-HT-A5RB-01A-11R-A28M-07	0.00821918	0	0
TCGA-QH-A6XC-01A-12R-A32Q-07	1.39178	0	0.440359
TCGA-DU-7290-01A-11R-2027-07	0.863014	1	0.606615
TCGA-DU-8164-01A-11R-2256-07	1.78356	0	0
TCGA-TQ-A7RO-01A-11R-A33Z-07	2.6	0	0
TCGA-DU-5853-01A-11R-1896-07	1.11507	0	0.0247477
TCGA-HT-7857-01A-11R-2403-07	0.0191781	0	0.0076158
TCGA-DU-A7TA-01A-11R-A33Z-07	7.0274	0	0.0642977
TCGA-S9-A7J0-01A-11R-A34F-07	1.66849	0	0.632141
TCGA-HW-A5KL-01A-11R-A27Q-07	2.40548	0	0.0348808
TCGA-FG-A60L-01A-12R-A31N-07	1.79452	0	0
TCGA-HT-A74O-01A-11R-A32Q-07	0.00821918	0	0
TCGA-CS-4943-01A-01R-1470-07	3.03014	1	0.00746479
TCGA-EZ-7264-01A-11R-2027-07	3.29041	0	0
TCGA-DU-7300-01A-21R-2090-07	5.16712	1	0
TCGA-HT-7482-01A-11R-2027-07	8.91233	0	0
TCGA-CS-6669-01A-11R-1896-07	4.09315	0	0
TCGA-VV-A86M-01A-11R-A36H-07	1.33425	0	0
TCGA-DU-5874-01A-11R-1708-07	1.26301	0	0
TCGA-VM-A8C8-01A-11R-A36H-07	3.8274	0	0
TCGA-P5-A72Z-01A-11R-A32Q-07	0.969863	0	0
TCGA-DH-5140-01A-01R-1470-07	1.66301	1	0.00721998
TCGA-FG-A4MW-01A-11R-A26U-07	1.53151	1	2.29809
TCGA-FN-7833-01A-11R-2090-07	2.29315	0	0
TCGA-DU-6405-01A-11R-1708-07	1.65753	1	0.00718747
TCGA-DU-7292-01A-11R-2027-07	0.663014	1	1.13751
TCGA-TQ-A7RF-01A-11R-A33Z-07	1.78082	0	0
TCGA-TM-A84O-01A-11R-A36H-07	2.76986	1	0.0098145
TCGA-DU-A5TT-01A-11R-A28M-07	2.03562	0	1.28235
TCGA-R8-A6MK-01A-11R-A32Q-07	7.40274	0	0.0152408
TCGA-S9-A6U1-01A-21R-A33Z-07	2.15068	0	0
TCGA-QH-A6X3-01A-21R-A32Q-07	0.857534	0	0
TCGA-HT-8019-01A-21R-2404-07	2.75068	0	0
TCGA-HT-8113-01A-11R-2404-07	2.46575	0	0
TCGA-DU-A6S8-01A-12R-A32Q-07	1.85753	0	0
TCGA-VM-A8CF-01A-11R-A36H-07	1.66849	0	0.0148325
TCGA-WY-A859-01A-12R-A36H-07	3.32329	0	0.00735516
TCGA-VV-A829-01A-21R-A36H-07	3.08767	0	0.0271241
TCGA-S9-A7QY-01A-11R-A34F-07	2.36438	0	0
TCGA-QH-A86X-01A-11R-A36H-07	0.923288	0	0
TCGA-DH-5141-01A-01R-1470-07	2.65205	0	0
TCGA-S9-A6TW-01A-12R-A32Q-07	3.42466	0	0
TCGA-WY-A85B-01A-11R-A36H-07	3.81644	0	0
TCGA-DH-A66B-01A-11R-A29R-07	3.50411	0	0.018503
TCGA-DU-6393-01A-11R-1708-07	4.34247	1	0.0582385
TCGA-CS-5394-01A-01R-1470-07	0.0219178	0	0
TCGA-DU-7015-01A-11R-2027-07	7.56438	0	0.0123573
TCGA-DU-7009-01A-11R-2027-07	12.863	1	0
TCGA-TM-A84J-01A-11R-A36H-07	2.0137	0	0.0703336
TCGA-E1-5322-01A-01R-1470-07	10.8986	1	0
TCGA-HT-7601-01A-11R-2090-07	0.419178	0	0
TCGA-TQ-A7RJ-01A-11R-A33Z-07	3.36712	0	0.00774641
TCGA-QH-A65S-01A-11R-A29R-07	0.210959	0	0
TCGA-R8-A73M-01A-11R-A32Q-07	4.94795	0	0
TCGA-HW-7495-01A-11R-2027-07	2.95342	0	0
TCGA-DU-7309-01A-11R-2090-07	0.230137	0	0.00656613
TCGA-HT-7877-01A-11R-2403-07	0.0109589	0	0
TCGA-DU-6403-01A-11R-1708-07	0.969863	1	0.805977
TCGA-FG-8181-01A-11R-2256-07	2.36164	0	0
TCGA-RY-A840-01A-11R-A36H-07	2.33973	0	0
TCGA-E1-A7Z2-01A-21R-A34R-07	1.09041	1	0
TCGA-DB-A64R-01A-11R-A29R-07	2.61644	0	0
TCGA-QH-A65V-01A-11R-A29R-07	1.05205	0	0.00986215
TCGA-E1-5307-01A-01R-1896-07	4.8274	1	0.00833554
TCGA-FG-5962-01B-11R-1896-07	3.98082	0	0.00712149
TCGA-TQ-A7RR-01A-21R-A34F-07	2.15616	0	0
TCGA-DU-7012-01A-11R-2027-07	0.545205	1	0.918138
TCGA-DU-6396-01A-11R-1708-07	6.26301	1	0
TCGA-DB-A4XF-01A-11R-A27Q-07	2.79726	0	0
TCGA-HT-7472-01A-11R-2027-07	0.00273973	0	0.00718939
TCGA-DU-7018-01A-11R-2027-07	2.55616	1	0
TCGA-DU-A76K-01A-11R-A33Z-07	0.950685	1	0.286203
TCGA-TM-A84H-01A-11R-A36H-07	2.53699	0	0.0161838
TCGA-HT-7855-01A-11R-2403-07	1.60274	0	0.00795844
TCGA-FG-8189-01B-11R-A28M-07	1.87671	0	0
TCGA-S9-A6U0-01A-12R-A32Q-07	2.03288	1	0.844762
TCGA-FG-A6IZ-01A-11R-A31N-07	1.25205	0	0.009396
TCGA-DU-7007-01A-11R-2027-07	5.24658	1	0.942288
TCGA-S9-A6WO-01A-21R-A34F-07	1.55068	0	0
TCGA-DH-A66D-01A-11R-A31N-07	2.31781	0	0
TCGA-HT-7469-01A-11R-2256-07	0.961644	1	8.18815
TCGA-WY-A85A-01A-21R-A36H-07	3.61644	0	0
TCGA-CS-5395-01A-01R-1470-07	1.75068	1	0
TCGA-QH-A6CX-01A-11R-A32Q-07	1.01918	1	0.555727
TCGA-DU-5855-01A-11R-1708-07	0.567123	0	0
TCGA-VW-A8FI-01A-11R-A36H-07	0.671233	1	0.955787
TCGA-DU-A5TP-01A-11R-A28M-07	2.7726	0	0
TCGA-E1-5302-01A-01R-1470-07	4.17808	1	0
TCGA-DB-A75L-01A-11R-A32Q-07	0.936986	0	0
TCGA-P5-A5EZ-01A-11R-A27Q-07	0.191781	0	0.0547375
TCGA-P5-A5EX-01A-12R-A28M-07	0.665753	0	0.00967647
TCGA-TM-A84G-01A-11R-A36H-07	3.3863	0	0
TCGA-DU-6401-01A-11R-1708-07	7.28767	1	0
TCGA-HW-A5KJ-01A-12R-A27Q-07	2.63562	1	0
TCGA-DU-A7T6-01A-11R-A33Z-07	1.49863	1	0.365805
TCGA-FG-7638-01B-12R-2090-07	1.87945	0	0
TCGA-HW-A5KM-01A-11R-A27Q-07	1.72603	0	0.0121579
TCGA-CS-6667-01A-12R-2027-07	4.02466	0	0
TCGA-HT-8107-01A-13R-2404-07	0.0383562	0	0
TCGA-HT-7881-01A-11R-2403-07	2.95616	0	0
TCGA-DU-8166-01A-11R-2256-07	1.4137	0	0
TCGA-DU-5854-01A-11R-1708-07	0.70411	0	0
TCGA-VW-A7QS-01A-12R-A33Z-07	1.93425	0	0.00883432
TCGA-DU-A76O-01A-11R-A32Q-07	1.43014	0	0
TCGA-HW-7487-01A-11R-2027-07	3.7863	0	0
TCGA-E1-A7YY-01A-11R-A34R-07	12.1781	1	0.00773404
TCGA-S9-A6TU-01A-12R-A32Q-07	7.26027	0	0
TCGA-RY-A83X-01A-11R-A36H-07	2.5726	0	0
TCGA-HT-7856-01A-11R-2403-07	3.25753	0	0
TCGA-RY-A83Y-01A-11R-A36H-07	0.454795	0	0
TCGA-QH-A870-01A-11R-A36H-07	1.08219	0	0
TCGA-DU-7011-01A-11R-2027-07	8.76712	1	0
TCGA-DU-6394-01A-11R-1708-07	1.86849	1	0
TCGA-DB-5274-01A-01R-1470-07	6.27123	0	0
TCGA-WY-A85C-01A-11R-A36H-07	3.90685	0	0.0579291
TCGA-VM-A8CA-01A-11R-A36H-07	1.12603	0	0
TCGA-FG-A713-01A-11R-A32Q-07	1.70411	0	0
TCGA-E1-5304-01A-01R-1470-07	3.4274	1	0
TCGA-HT-7475-01A-11R-2027-07	1.45205	0	0
TCGA-DU-A7TB-01A-11R-A33Z-07	4.29315	0	0
TCGA-FG-A4MU-01B-11R-A28M-07	0.893151	0	0.507353
TCGA-S9-A7IX-01A-12R-A34F-07	2.24384	1	0.0145449
TCGA-E1-5303-01A-01R-1470-07	5.62192	1	0
TCGA-HT-7468-01A-11R-2027-07	0.556164	0	0
TCGA-HT-7477-01B-11R-A28M-07	2.02192	0	0.0456616
TCGA-TQ-A7RP-01A-21R-A34F-07	2.50411	0	0.0431485
TCGA-P5-A72U-01A-31R-A32Q-07	0.0191781	0	1.45027
TCGA-P5-A731-01A-11R-A32Q-07	0.750685	0	0.194668
TCGA-E1-A7YM-01A-11R-A34F-07	1.77534	1	0
TCGA-DB-A64X-01A-11R-A29R-07	1.54247	0	0.102336
TCGA-HT-8110-01A-11R-2404-07	1.14795	0	1.12926
TCGA-DU-A6S2-01A-21R-A32Q-07	2.12877	0	0
TCGA-HT-8109-01A-11R-2404-07	0.463014	0	0
TCGA-S9-A89Z-01A-11R-A36H-07	1.70685	0	0.0331257
TCGA-HT-A5RC-01A-11R-A28M-07	0.443836	1	0.00992807
TCGA-DU-A6S6-01A-21R-A32Q-07	7.92603	0	0
TCGA-FG-A87Q-01A-11R-A36H-07	0.476712	0	1.55583
TCGA-WY-A85E-01A-11R-A36H-07	1.73425	0	0.00824904
TCGA-TQ-A7RN-01A-11R-A33Z-07	2.81096	0	0
TCGA-HT-7483-01A-11R-2027-07	14.3973	0	0
TCGA-DU-7294-01A-11R-2027-07	7.86027	0	0
TCGA-VM-A8CH-01A-12R-A36H-07	1.95616	0	0
TCGA-HT-7609-01A-11R-2090-07	3.83288	0	0
TCGA-DB-5270-01A-02R-1470-07	10.2274	0	0
TCGA-DU-7014-01A-11R-2027-07	9.78356	1	0
TCGA-DB-A64P-01A-11R-A29R-07	2.50959	0	0
TCGA-TM-A84B-01A-11R-A36H-07	2.07671	1	0.983731
TCGA-DB-A75K-01A-11R-A32Q-07	1.00822	0	0
TCGA-E1-5318-01A-01R-1470-07	6.51781	1	0
TCGA-DU-6399-01A-12R-1708-07	5.47945	1	0
TCGA-FG-A6J3-01A-11R-A31N-07	1.85479	0	2.23104
TCGA-FG-A70Z-01A-12R-A33Z-07	0.89863	0	0.589937
TCGA-S9-A7J3-01A-21R-A34R-07	1.72329	0	0.0303257
TCGA-DH-5142-01A-01R-1470-07	5.32329	0	0.00833306
TCGA-DB-A64Q-01A-11R-A29R-07	0.49863	0	0
TCGA-HT-7873-01B-11R-2403-07	1.96712	0	0
TCGA-P5-A733-01A-11R-A32Q-07	1.13425	0	0.00853361
TCGA-E1-A7YL-01A-11R-A34F-07	1.34795	1	6.12482
TCGA-TM-A84I-01A-11R-A36H-07	2.33973	0	0.512344
TCGA-E1-A7Z4-01A-11R-A34R-07	12.0877	1	0
TCGA-S9-A6WE-01A-12R-A33Z-07	11.2685	0	0
TCGA-FG-6691-01A-11R-1896-07	3.44384	0	0
TCGA-DU-5871-01A-12R-1708-07	1.57808	0	0
TCGA-S9-A7J2-01A-11R-A34F-07	0.169863	0	0
TCGA-HT-7684-01A-11R-2256-07	0.50411	0	0
TCGA-S9-A7IY-01A-11R-A34F-07	1.9589	0	0
TCGA-DU-6410-01A-11R-1896-07	0.663014	0	0
TCGA-HT-7607-01A-11R-2090-07	0.263014	1	0
TCGA-E1-5305-01A-01R-1896-07	6.66575	1	0
TCGA-DB-A4XG-01A-11R-A27Q-07	6.07945	0	0.00840145
TCGA-HW-7486-01A-11R-2027-07	4.71507	0	0
TCGA-E1-A7YU-01A-11R-A34R-07	0.0630137	1	0
TCGA-P5-A736-01A-11R-A32Q-07	0.630137	0	0
TCGA-HT-A74J-01A-12R-A32Q-07	0.876712	0	0
TCGA-HT-7620-01A-11R-2256-07	1.18904	0	0
TCGA-HT-A74L-01A-11R-A32Q-07	0.920548	0	0.0221288
TCGA-HT-A5R7-01A-11R-A28M-07	1.68493	0	0.0633194
TCGA-FG-7634-01A-11R-2090-07	1.27945	0	0
TCGA-FG-A4MX-01A-11R-A26U-07	1.5589	0	0.0179521
TCGA-DB-5275-01A-01R-1470-07	3.99452	0	0.0209162
TCGA-DB-A64U-01A-11R-A29R-07	2.31781	0	0
TCGA-HT-A5RA-01A-11R-A28M-07	2.27945	0	3.54792
TCGA-DB-A64S-01A-11R-A29R-07	2.28767	0	0
TCGA-HT-8563-01A-11R-2404-07	2.35616	0	0
TCGA-TM-A84F-01A-11R-A36H-07	4.92055	0	0
TCGA-HT-7880-01A-11R-2403-07	0.443836	0	0
TCGA-DH-A7UV-01A-12R-A34F-07	1.55068	0	0.048268
TCGA-DB-A4XA-01A-11R-A26U-07	1.56986	0	0
TCGA-S9-A6WM-01A-12R-A33Z-07	1.65479	0	0.735983
TCGA-R8-A6MO-01A-11R-A33Z-07	2.72055	0	0
TCGA-HT-8114-01A-11R-2404-07	2.84932	0	0
TCGA-HT-7471-01A-11R-2256-07	0.0109589	0	0
TCGA-HT-A5R5-01A-11R-A28M-07	0.0109589	0	0.0104169
TCGA-DU-A6S3-01A-12R-A32Q-07	1.79726	0	0
TCGA-06-2567-01A-01R-1849-01	0.364384	1	0.285127
